# Supplementary material
Source: MDPI journal article supplement (https://www.mdpi.com/2073-4352/8/5/229)

# checkCIF/PLATON report

You have not supplied any structure factors. As a result the full set of tests cannot be run.

THIS REPORT IS FOR GUIDANCE ONLY. IF USED AS PART OF A REVIEW PROCEDURE FOR PUBLICATION, IT SHOULD NOT REPLACE THE EXPERTISE OF AN EXPERIENCED CRYSTALLOGRAPHIC REFEREE.

No syntax errors found.      CIF dictionary      Interpreting this report

## Datablock: 170623e

---

Bond precision:    C-C = 0.0157 Å                      Wavelength=0.71073

Cell:                      a=14.3022(13)              b=34.152(3)              c=19.4743(17)  
                            alpha=90                      beta=106.772(2)              gamma=90

Temperature:            298 K

|                        | Calculated                                          | Reported                           |
|------------------------|-----------------------------------------------------|------------------------------------|
| Volume                 | 9107.6(14)                                          | 9107.6(14)                         |
| Space group            | P 21/n                                              | P 21/n                             |
| Hall group             | -P 2yn                                              | ?                                  |
| Moiety formula         | 2(C76 H56 Eu Fe4 N8 O20),<br>7(C5 H5 N), 2(C5 H6 N) | ?                                  |
| Sum formula            | C197 H159 Eu2 Fe8 N25 O40                           | C98.50 H79.50 Eu Fe4<br>N12.50 O20 |
| Mr                     | 4267.24                                             | 2133.61                            |
| Dx, g cm <sup>-3</sup> | 1.556                                               | 1.556                              |
| Z                      | 2                                                   | 4                                  |
| Mu (mm <sup>-1</sup> ) | 1.381                                               | 1.381                              |
| F000                   | 4340.0                                              | 4340.0                             |
| F000'                  | 4346.55                                             |                                    |
| h,k,lmax               | 17,40,23                                            | 17,40,23                           |
| Nref                   | 16068                                               | 16024                              |
| Tmin,Tmax              | 0.594,0.679                                         | 0.608,0.863                        |
| Tmin'                  | 0.570                                               |                                    |

Correction method= # Reported T Limits: Tmin=0.608 Tmax=0.863  
AbsCorr = MULTI-SCAN

Data completeness= 0.997                      Theta(max)= 25.020

R(reflections)= 0.0594( 10074)              wR2(reflections)= 0.1646( 16024)

S = 1.020                      Npar= 1225

---

The following ALERTS were generated. Each ALERT has the format

**test-name\_ALERT\_alert-type\_alert-level.**

Click on the hyperlinks for more details of the test.

### ● Alert level C

|                   |                                                         |              |
|-------------------|---------------------------------------------------------|--------------|
| CRYSC01_ALERT_1_C | No recognised colour has been given for crystal colour. |              |
| PLAT220_ALERT_2_C | Non-Solvent Resd 1 C Ueq(max)/Ueq(min) Range            | 4.2 Ratio    |
| PLAT234_ALERT_4_C | Large Hirshfeld Difference N7 --C67                     | 0.16 Ang.    |
| PLAT234_ALERT_4_C | Large Hirshfeld Difference N8 --C76                     | 0.16 Ang.    |
| PLAT234_ALERT_4_C | Large Hirshfeld Difference C69 --C70                    | 0.19 Ang.    |
| PLAT234_ALERT_4_C | Large Hirshfeld Difference C70 --C71                    | 0.19 Ang.    |
| PLAT241_ALERT_2_C | High 'MainMol' Ueq as Compared to Neighbors of C70      | Check        |
| PLAT241_ALERT_2_C | High 'MainMol' Ueq as Compared to Neighbors of C75      | Check        |
| PLAT242_ALERT_2_C | Low 'MainMol' Ueq as Compared to Neighbors of N7        | Check        |
| PLAT243_ALERT_4_C | High 'Solvent' Ueq as Compared to Neighbors of C92      | Check        |
| PLAT243_ALERT_4_C | High 'Solvent' Ueq as Compared to Neighbors of C90      | Check        |
| PLAT244_ALERT_4_C | Low 'Solvent' Ueq as Compared to Neighbors of C93       | Check        |
| PLAT244_ALERT_4_C | Low 'Solvent' Ueq as Compared to Neighbors of C95       | Check        |
| PLAT244_ALERT_4_C | Low 'Solvent' Ueq as Compared to Neighbors of C91       | Check        |
| PLAT250_ALERT_2_C | Large U3/U1 Ratio for Average U(i,j) Tensor ....        | 2.6 Note     |
| PLAT331_ALERT_2_C | Small Average Phenyl C-C Dist C37 -C42                  | 1.37 Ang.    |
| PLAT342_ALERT_3_C | Low Bond Precision on C-C Bonds .....                   | 0.01569 Ang. |
| PLAT369_ALERT_2_C | Long C(sp2)-C(sp2) Bond C88 - C89 .                     | 1.53 Ang.    |
| PLAT411_ALERT_2_C | Short Inter H...H Contact H92 ..H97                     | 2.03 Ang.    |
| PLAT411_ALERT_2_C | Short Inter H...H Contact H96 ..H99                     | 2.11 Ang.    |

### ● Alert level G

|                   |                                                         |             |
|-------------------|---------------------------------------------------------|-------------|
| PLAT002_ALERT_2_G | Number of Distance or Angle Restraints on AtSite        | 41 Note     |
| PLAT003_ALERT_2_G | Number of Uiso or Uij Restrained non-H Atoms ...        | 137 Report  |
| PLAT005_ALERT_5_G | No Embedded Refinement Details Found in the CIF         | Please Do ! |
| PLAT007_ALERT_5_G | Number of Unrefined Donor-H Atoms .....                 | 1 Report    |
| PLAT045_ALERT_1_G | Calculated and Reported Z Differ by a Factor ...        | 0.50 Check  |
| PLAT300_ALERT_4_G | Atom Site Occupancy of N13 Constrained at               | 0.5 Check   |
| PLAT300_ALERT_4_G | Atom Site Occupancy of C98 Constrained at               | 0.5 Check   |
| PLAT300_ALERT_4_G | Atom Site Occupancy of H98 Constrained at               | 0.5 Check   |
| PLAT302_ALERT_4_G | Anion/Solvent/Minor-Residue Disorder (Resd 2 )          | 27% Note    |
| PLAT432_ALERT_2_G | Short Inter X...Y Contact N12 ..C99                     | 2.47 Ang.   |
| PLAT432_ALERT_2_G | Short Inter X...Y Contact N12 ..C97                     | 2.55 Ang.   |
| PLAT432_ALERT_2_G | Short Inter X...Y Contact C92 ..C97                     | 3.06 Ang.   |
| PLAT432_ALERT_2_G | Short Inter X...Y Contact C96 ..C99                     | 3.12 Ang.   |
| PLAT790_ALERT_4_G | Centre of Gravity not Within Unit Cell: Resd. # C5 H5 N | 3 Note      |
| PLAT794_ALERT_5_G | Tentative Bond Valency for Eu1 (III) .                  | 3.28 Info   |
| PLAT794_ALERT_5_G | Tentative Bond Valency for Fe1 (III) .                  | 3.02 Info   |
| PLAT794_ALERT_5_G | Tentative Bond Valency for Fe2 (III) .                  | 3.09 Info   |
| PLAT794_ALERT_5_G | Tentative Bond Valency for Fe3 (III) .                  | 3.08 Info   |
| PLAT794_ALERT_5_G | Tentative Bond Valency for Fe4 (III) .                  | 3.03 Info   |
| PLAT860_ALERT_3_G | Number of Least-Squares Restraints .....                | 4020 Note   |
| PLAT899_ALERT_4_G | SHELXL97 is Deprecated and Succeeded by SHELXL          | 2018 Note   |

0 **ALERT level A** = Most likely a serious problem - resolve or explain

0 **ALERT level B** = A potentially serious problem, consider carefully

20 **ALERT level C** = Check. Ensure it is not caused by an omission or oversight

21 **ALERT level G** = General information/check it is not something unexpected

2 ALERT type 1 CIF construction/syntax error, inconsistent or missing data

15 ALERT type 2 Indicator that the structure model may be wrong or deficient  
2 ALERT type 3 Indicator that the structure quality may be low  
15 ALERT type 4 Improvement, methodology, query or suggestion  
7 ALERT type 5 Informative message, check

---

It is advisable to attempt to resolve as many as possible of the alerts in all categories. Often the minor alerts point to easily fixed oversights, errors and omissions in your CIF or refinement strategy, so attention to these fine details can be worthwhile. In order to resolve some of the more serious problems it may be necessary to carry out additional measurements or structure refinements. However, the purpose of your study may justify the reported deviations and the more serious of these should normally be commented upon in the discussion or experimental section of a paper or in the "special\_details" fields of the CIF. checkCIF was carefully designed to identify outliers and unusual parameters, but every test has its limitations and alerts that are not important in a particular case may appear. Conversely, the absence of alerts does not guarantee there are no aspects of the results needing attention. It is up to the individual to critically assess their own results and, if necessary, seek expert advice.

### **Publication of your CIF in IUCr journals**

A basic structural check has been run on your CIF. These basic checks will be run on all CIFs submitted for publication in IUCr journals (*Acta Crystallographica*, *Journal of Applied Crystallography*, *Journal of Synchrotron Radiation*); however, if you intend to submit to *Acta Crystallographica Section C* or *E* or *IUCrData*, you should make sure that full publication checks are run on the final version of your CIF prior to submission.

### **Publication of your CIF in other journals**

Please refer to the *Notes for Authors* of the relevant journal for any special instructions relating to CIF submission.

---

**PLATON version of 23/04/2018; check.def file version of 23/04/2018**

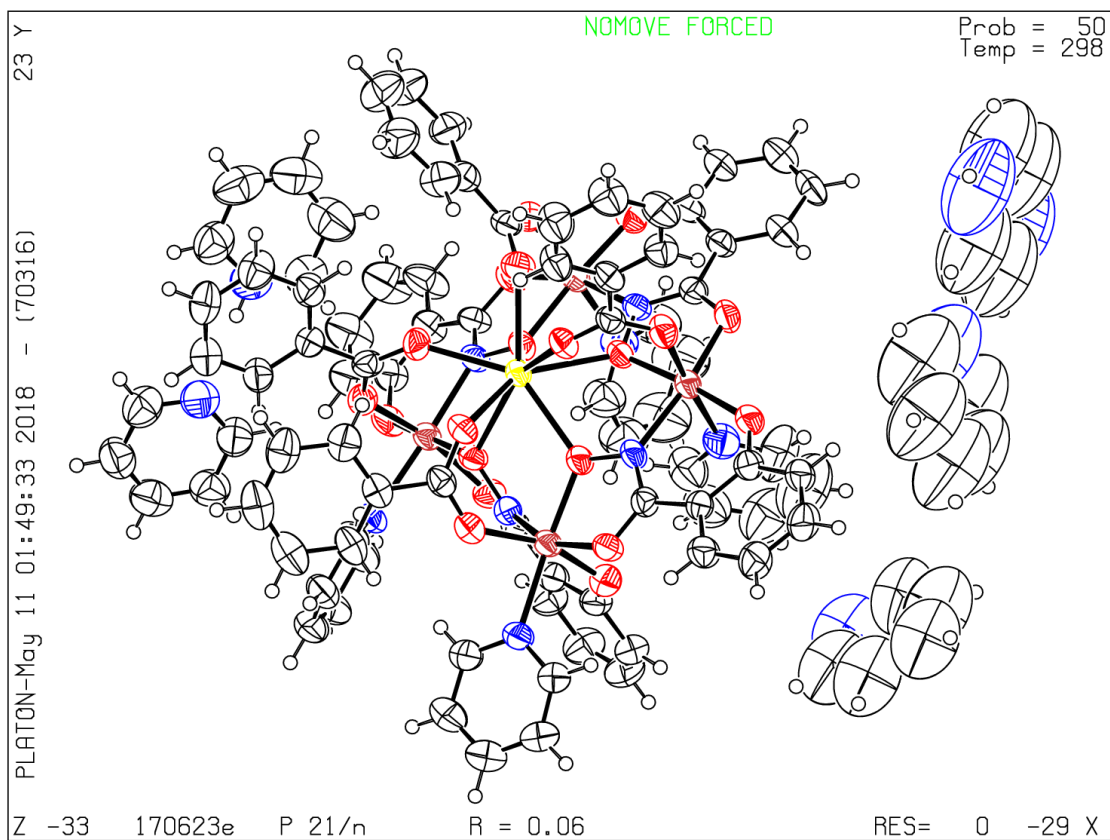

Supplement: s1 [file s1]
