# Supplementary material
Source: MDPI journal article supplement (https://www.mdpi.com/2073-4352/8/5/229)
Supplement: s1 [file s1]

## Supporting Information

### **A New Family of Heterometallic $\text{Ln}^{\text{III}}$ [12- $\text{MC}_{\text{Fe}^{\text{III}}\text{N}(\text{shi})}$ ]-4]**

### **Complexes: Syntheses, Structures, and Magnetic Properties**

Tingting Lou, Hua Yang, Suyuan Zeng, Dacheng Li, Jianmin Dou\*

\*Corresponding author Tel: +8606358239298. E-mail: dougroup@163.com

School of Chemistry and Chemical Engineering, and Shandong Provincial Key Laboratory of Chemical Energy Storage and Novel Cell Technology, Liaocheng University, Liaocheng, Shandong 252000, PR China.

## Contents:

**Figure. S1.** The experimental XRD pattern of samples and the simulated XRD pattern of single crystal X-ray diffraction data for complexes **1-4**.

**Figure. S2.** Distorted square-antiprismatic geometries around Dy1(a), Eu1(b), Gd1(c), Tb1(d).

**Figure. S3.** Fe 2p XP spectras of complexes **1** (a), **2** (b), **3** (c), **4** (d) in monolayers.

**Figure. S4.** Temperature dependence of the in-phase ( $\chi'_M$ ) and out-of phase ( $\chi''_M$ ) ac susceptibility signals of complex **1** measured under 2.0 Oe field with a 0 dc field.

**Figure. S5.** Temperature dependence of the in-phase ( $\chi'_M$ ) and out-of phase ( $\chi''_M$ ) ac susceptibility signals of complex **1** measured under 2.0 Oe field with a 2000 Oe dc field.

**Figure. S6.** Temperature dependence of the in-phase ( $\chi'_M$ ) and out-of phase ( $\chi''_M$ ) ac susceptibility signals of complex **2** measured under 2.0 Oe field with a 0 dc field.

**Figure. S7.** Temperature dependence of the in-phase ( $\chi'_M$ ) and out-of phase ( $\chi''_M$ ) ac susceptibility signals of complex **2** measured under 2.0 Oe field with a 2000 Oe dc field.

**Figure. S8.** Temperature dependence of the in-phase ( $\chi'_M$ ) and out-of phase ( $\chi''_M$ ) ac susceptibility signals of complex **3** measured under 2.0 Oe field with a 0 Oe dc field.

**Figure. S9.** Temperature dependence of the in-phase ( $\chi'_M$ ) and out-of phase ( $\chi''_M$ ) ac susceptibility signals of complex **3** measured under 2.0 Oe field with a 2000 Oe dc field.

**Figure. S10.** Temperature dependence of the in-phase ( $\chi'_M$ ) and out-of phase ( $\chi''_M$ ) ac susceptibility signals of complex **4** measured under 2.0 Oe field with a 0 Oe dc field.

**Figure. S11.** Plots of isothermal magnetization  $M$  vs.  $H$  for complex **1** at 1.8-8 K (left).

Plots of magnetization  $M$  vs.  $H/T$  for complex **1** at 1-7 T (right).

**Figure. S12.** Plots of isothermal magnetization  $M$  vs.  $H$  for complex **2** at 1.8-8 K (left).

Plots of magnetization  $M$  vs.  $H/T$  for complex **2** at 1-7 T (right).

**Figure. S13.** Plots of isothermal magnetization  $M$  vs.  $H$  for complex **3** at 1.8-8 K (left).

Plots of magnetization  $M$  vs.  $H/T$  for complex **3** at 1-7 T (right).

**Figure. S14.** Plots of isothermal magnetization  $M$  vs.  $H$  for complex **4** at 1.8-8 K (left).

Plots of magnetization  $M$  vs.  $H/T$  for complex **4** at 1-7 T (right).

**Table S1.** The BVS calculations for complexes **1-4**

**Table S2.** Selected bond angles for complexes **1-3**

**Table S3.** The distances between Ln-O for complexes **1-4**

**Table S4.** The distortion angles of benzoate for complexes **1-4**

**Table S5.** Fit parameters for the Fe 2p XP spectra of complexes **1-4**.

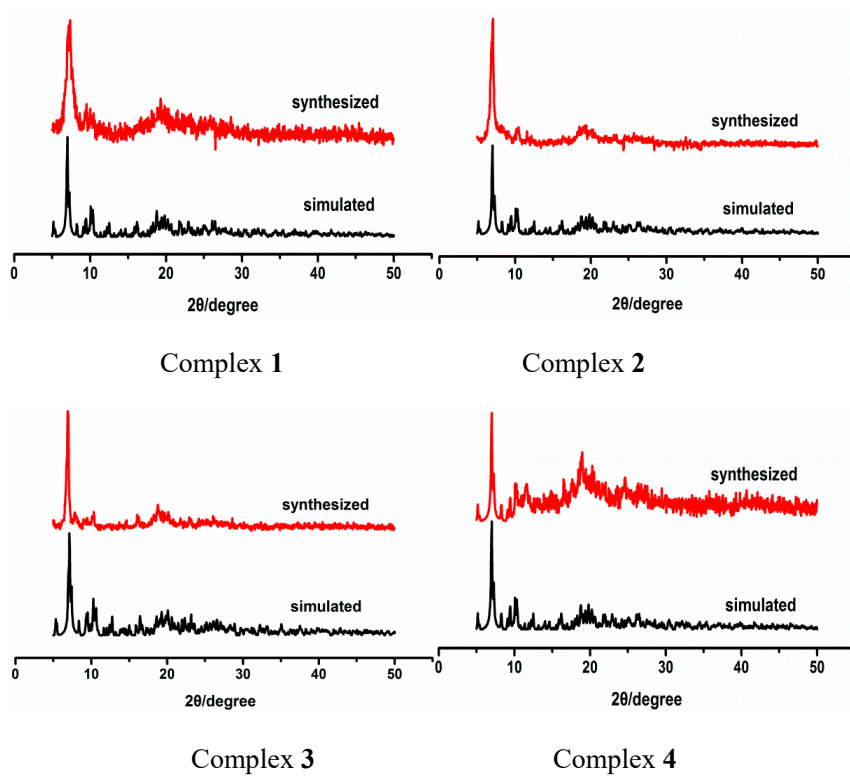

**Figure. S1.** The experimental XRD pattern of samples and the simulated XRD pattern of single crystal X-ray diffraction data for complexes 1-4.

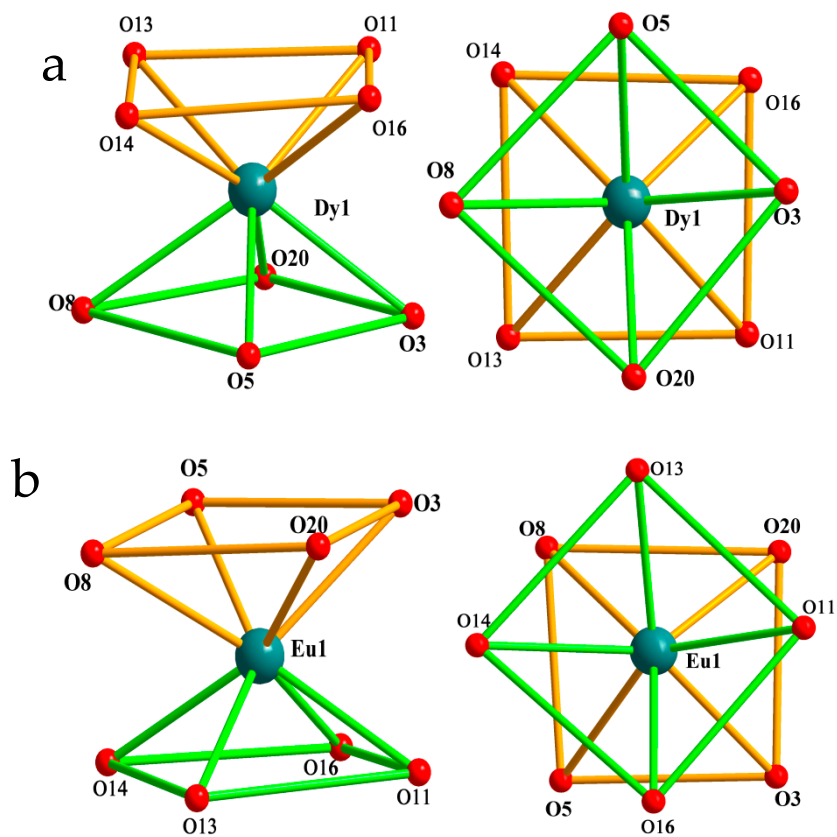

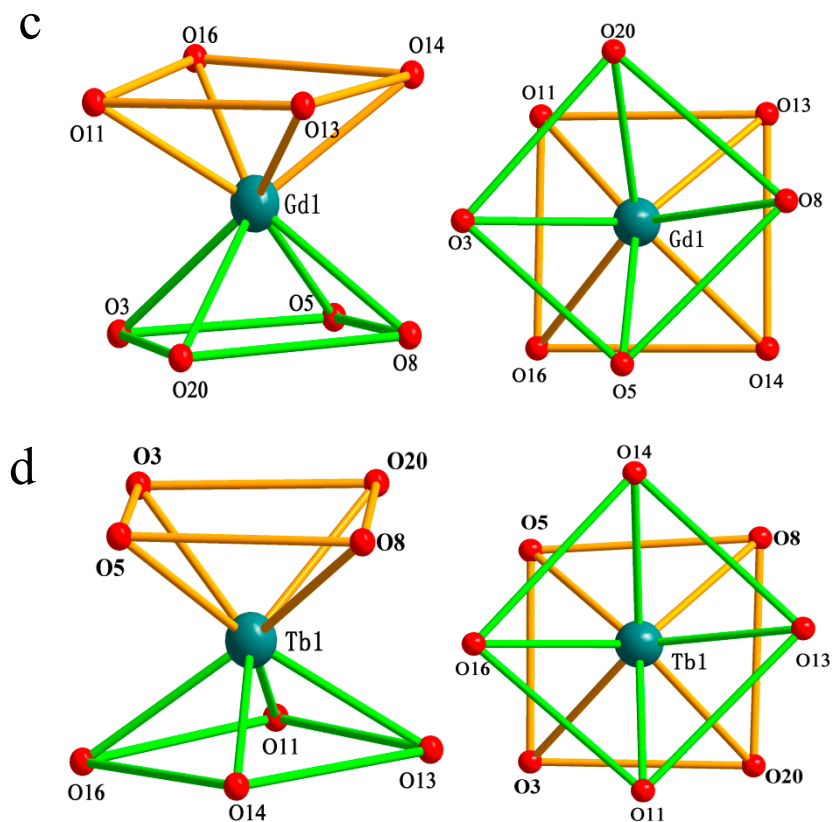

**Figure. S2.** Distorted square-antiprismatic geometries around Dy1(a), Eu1(b), Gd1(c), Tb1(d)

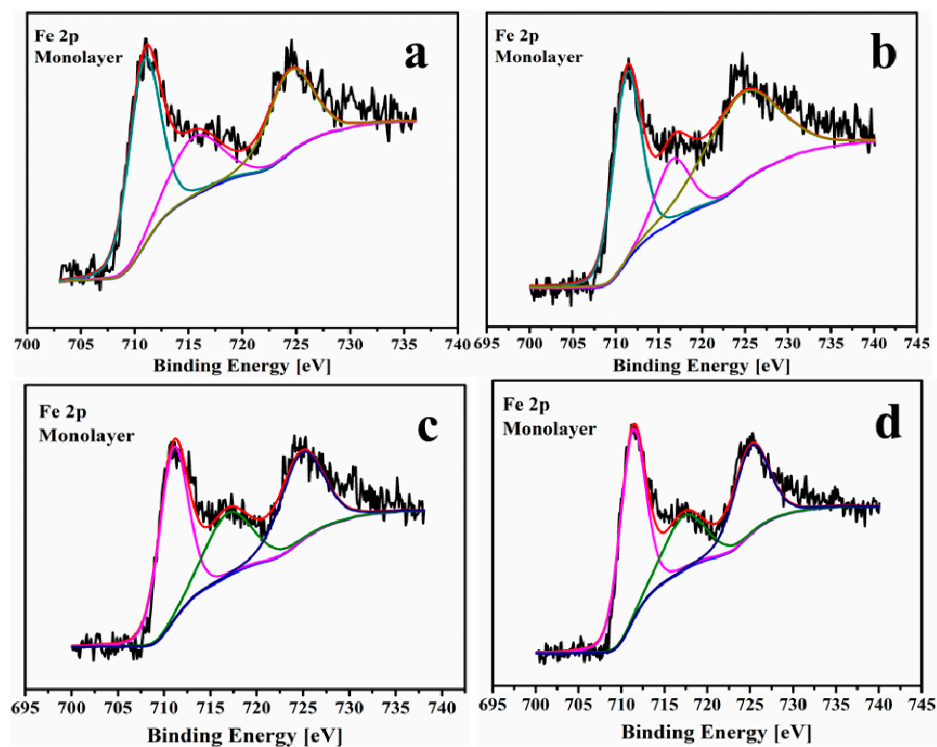

**Figure. S3.** Fe 2p XP spectras of complexes 1 (a), 2 (b), 3 (c), 4 (d) in monolayers.

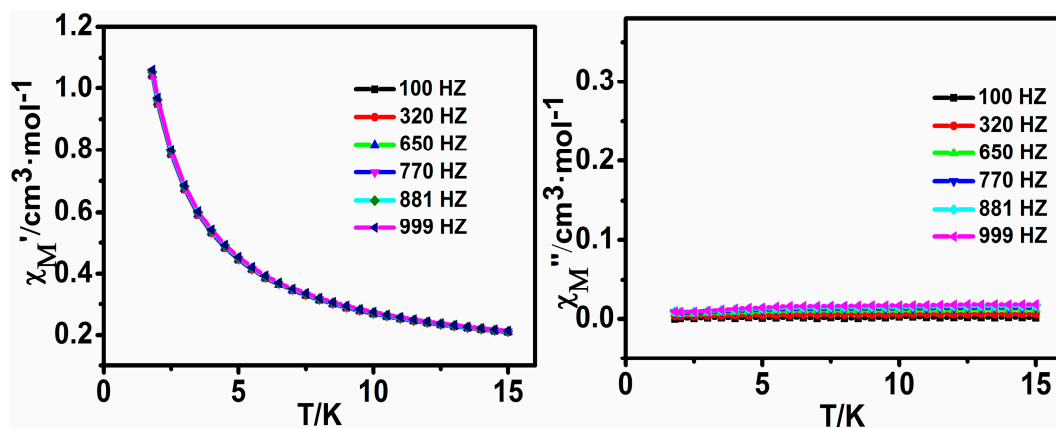

**Figure. S4.** Temperature dependence of the in-phase ( $\chi'_M$ ) and out-of phase ( $\chi''_M$ ) ac susceptibility signals of complex 1 measured under 2.0 Oe field with a 0 dc field.

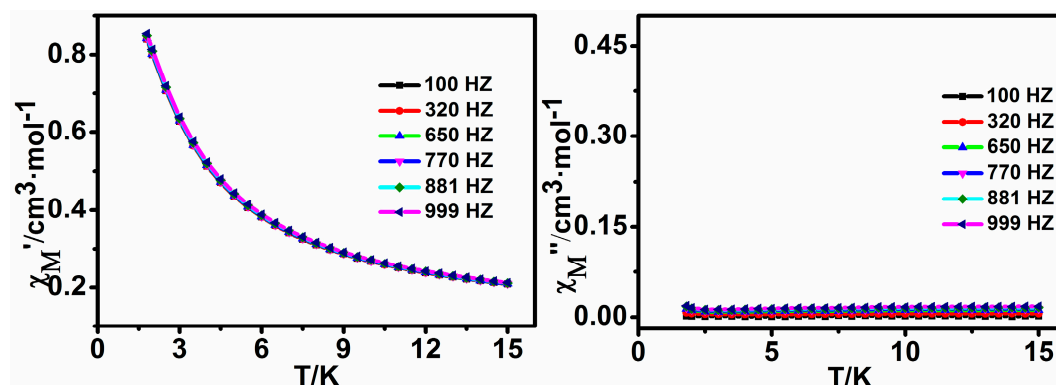

**Figure. S5.** Temperature dependence of the in-phase ( $\chi'_M$ ) and out-of phase ( $\chi''_M$ ) ac susceptibility signals of complex 1 measured under 2.0 Oe field with a 2000 Oe dc field.

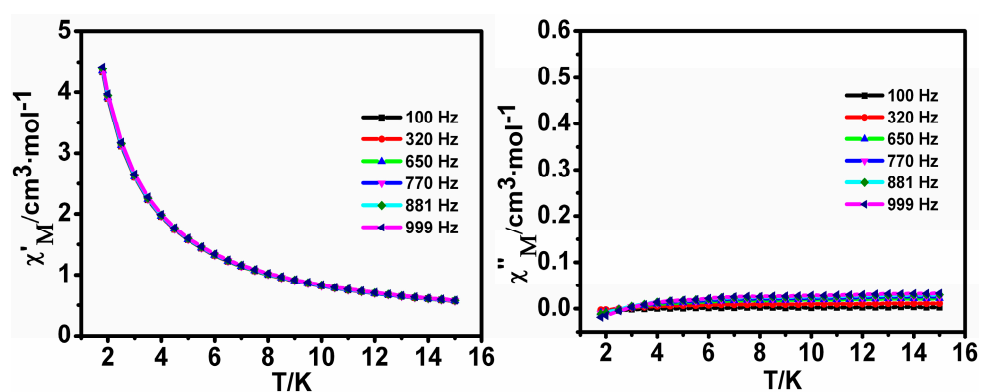

**Figure. S6.** Temperature dependence of the in-phase ( $\chi'_M$ ) and out-of phase ( $\chi''_M$ ) ac susceptibility signals of complex 2 measured under 2.0 Oe field with a 0 dc field.

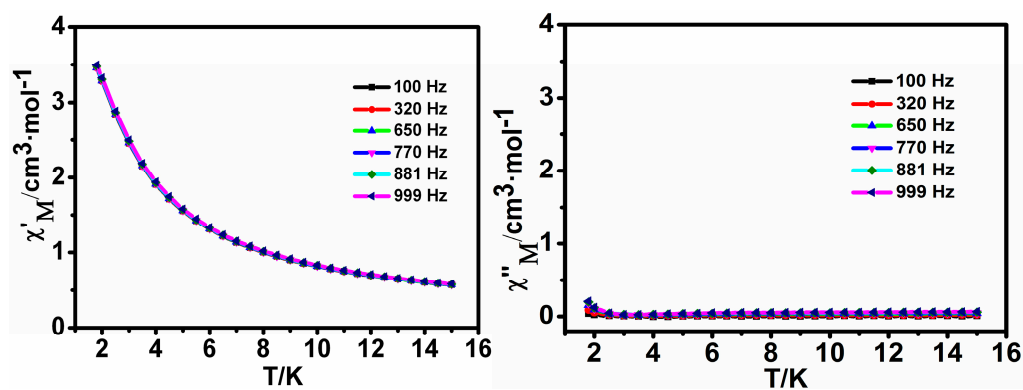

**Figure. S7.** Temperature dependence of the in-phase ( $\chi'_M$ ) and out-of phase ( $\chi''_M$ ) ac susceptibility signals of complex 2 measured under 2.0 Oe field with a 2000 Oe dc field.

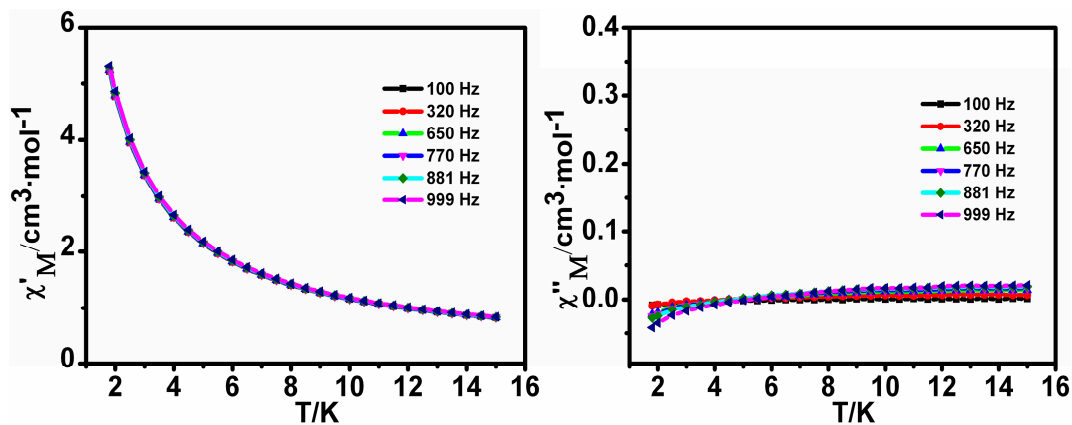

**Figure. S8.** Temperature dependence of the in-phase ( $\chi'_M$ ) and out-of phase ( $\chi''_M$ ) ac susceptibility signals of complex 3 measured under 2.0 Oe field with a 0 Oe dc field.

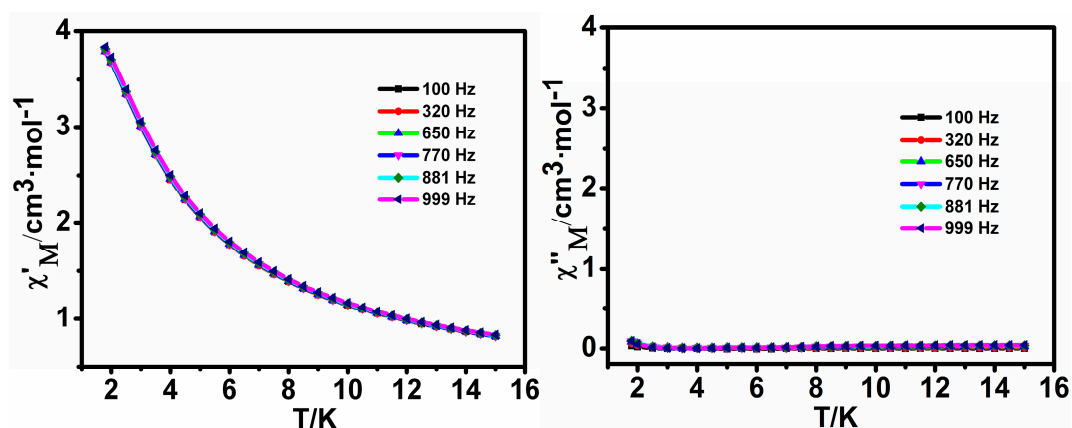

**Figure. S9.** Temperature dependence of the in-phase ( $\chi'_M$ ) and out-of phase ( $\chi''_M$ ) ac susceptibility signals of complex 3 measured under 2.0 Oe field with a 2000 Oe dc field.

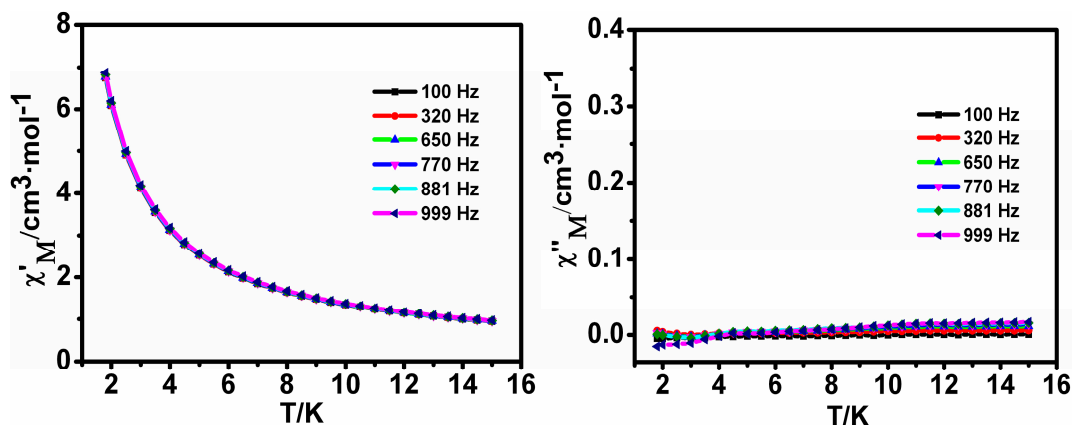

Figure. S10. Temperature dependence of the in-phase ( $\chi'_M$ ) and out-of phase ( $\chi''_M$ ) ac susceptibility signals of complex 4 measured under 2.0 Oe field with a 0 Oe dc field.

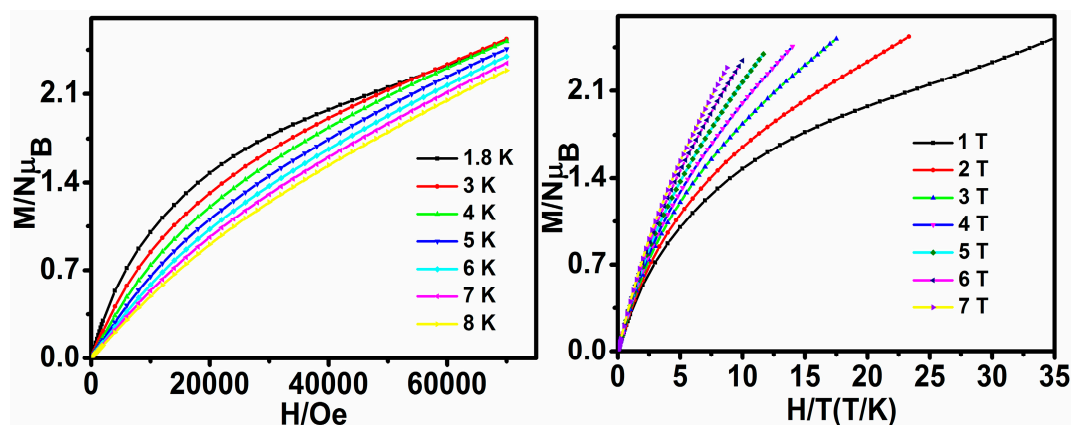

Figure. S11. Plots of isothermal magnetization  $M$  vs.  $H$  for complex 1 at 1.8- 8 K (left).

Plots of magnetization  $M$  vs.  $H/T$  for complex 1 at 1-7 T (right).

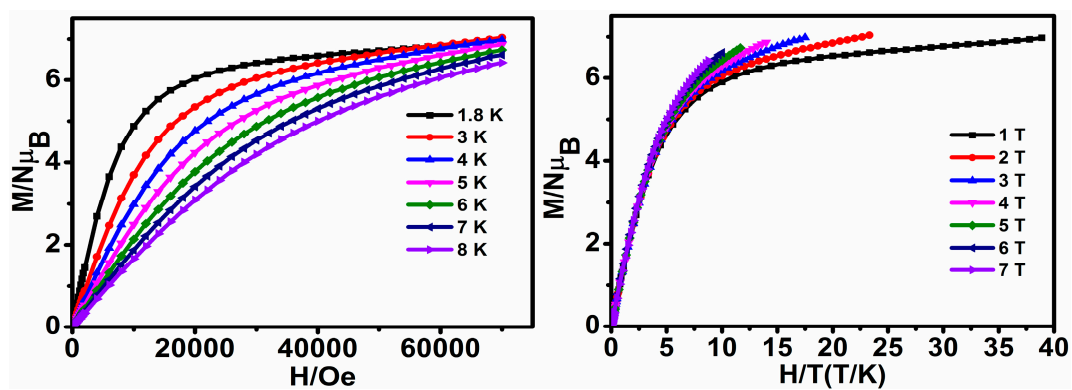

Figure. S12. Plots of isothermal magnetization  $M$  vs.  $H$  for complex 2 at 1.8- 8 K (left).

Plots of magnetization  $M$  vs.  $H/T$  for complex 2 at 1-7 T (right).



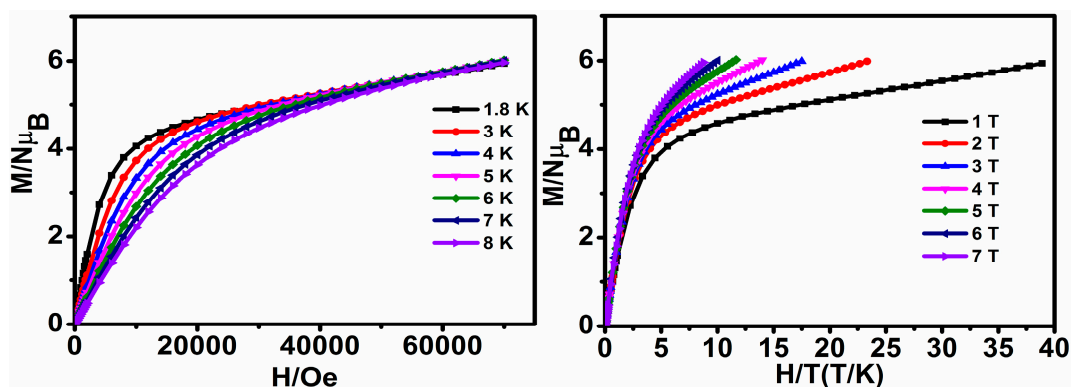

**Figure. S13.** Plots of isothermal magnetization  $M$  vs.  $H$  for complex 3 at 1.8- 8 K (left).

Plots of magnetization  $M$  vs.  $H/T$  for complex 3 at 1-7 T (right).

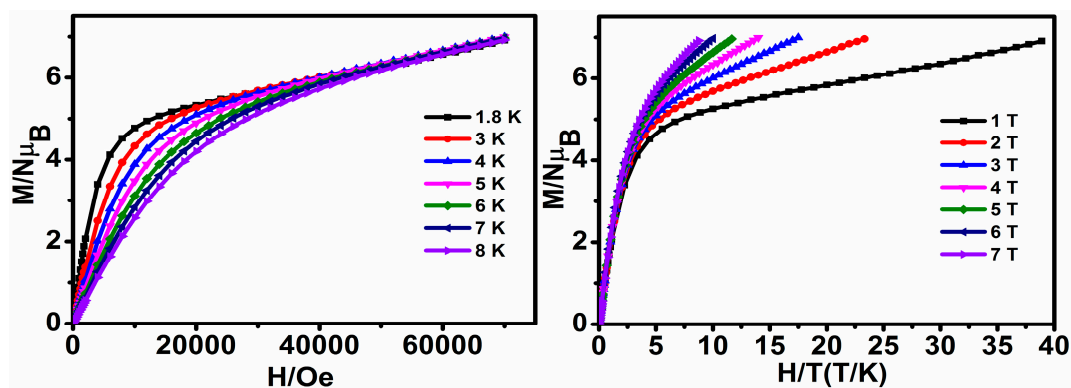

**Figure. S14.** Plots of isothermal magnetization  $M$  vs.  $H$  for complex 4 at 1.8- 8 K (left).

Plots of magnetization  $M$  vs.  $H/T$  for complex 4 at 1-7 T (right).

**Table S1.** The BVS calculations for complexes 1-4

|     | Complex 1        |                  | Complex 2        |                  | Complex 3        |                  | Complex 4        |                  |
|-----|------------------|------------------|------------------|------------------|------------------|------------------|------------------|------------------|
|     | Fe <sup>2+</sup> | Fe <sup>3+</sup> |
| Fe1 | 2.87             | 3.14             | 2.91             | 3.18             | 2.86             | 3.13             | 2.86             | 3.12             |
| Fe2 | 2.87             | 3.19             | 3.02             | 3.29             | 2.92             | 3.19             | 2.88             | 3.14             |
| Fe3 | 2.91             | 3.18             | 3.02             | 3.29             | 2.89             | 3.15             | 2.91             | 3.17             |
| Fe4 | 2.87             | 3.12             | 2.92             | 3.19             | 2.87             | 3.12             | 2.85             | 3.11             |

**Table S2.** Selected bond angles for complexes 1-3

| Complex 1                 |              |                          |              |
|---------------------------|--------------|--------------------------|--------------|
| O(13)-Eu(1)-O(16)         | 117.192(155) | O(20)-Eu(1)-O(5)         | 108.016(129) |
| ( $\gamma$ angle)         |              | ( $\gamma$ angle)        |              |
| $\alpha$ angle (O13, O16) | 58.596       | $\alpha$ angle (O20, O5) | 54.008       |
| O(14)-Eu(1)-O(11)         | 119.929(160) | O(3)-Eu(1)-O(8)          | 111.431(144) |
| ( $\gamma$ angle)         |              | ( $\gamma$ angle)        |              |

|                                        |              |                                       |              |
|----------------------------------------|--------------|---------------------------------------|--------------|
| $\alpha$ angle (O14, O11)              | 59.965       | $\alpha$ angle (O3, O8)               | 55.717       |
| <b>Complex 2</b>                       |              |                                       |              |
| O(13)-Gd(1)-O(16)<br>( $\gamma$ angle) | 115.572(147) | O(20)-Gd(1)-O(5)<br>( $\gamma$ angle) | 107.819(136) |
| $\alpha$ angle (O13, O16)              | 57.786       | $\alpha$ angle (O20, O5)              | 53.910       |
| O(14)-Gd(1)-O(11)<br>( $\gamma$ angle) | 118.751(136) | O(3)-Gd(1)-O(8)<br>( $\gamma$ angle)  | 112.195(145) |
| $\alpha$ angle (O14, O11)              | 59.376       | $\alpha$ angle (O3, O8)               | 56.098       |
| <b>Complex 3</b>                       |              |                                       |              |
| O(13)-Tb(1)-O(16)<br>( $\gamma$ angle) | 116.910(199) | O(20)-Tb(1)-O(5)<br>( $\gamma$ angle) | 108.693(167) |
| $\alpha$ angle (O13, O16)              | 58.455       | $\alpha$ angle (O20, O5)              | 54.347       |
| O(14)-Tb(1)-O(11)<br>( $\gamma$ angle) | 119.210(195) | O(3)-Tb(1)-O(8)<br>( $\gamma$ angle)  | 111.314(149) |
| $\alpha$ angle (O14, O11)              | 59.605       | $\alpha$ angle (O3, O8)               | 55.657       |

**Table S3.** The distances between Ln-O for complexes 1–4

| complex 1   |          | complex 2   |          |
|-------------|----------|-------------|----------|
| Eu(1)-O(11) | 2.378(4) | Gd(1)-O(11) | 2.361(4) |
| Eu(1)-O(14) | 2.379(4) | Gd(1)-O(14) | 2.369(3) |
| Eu(1)-O(13) | 2.381(4) | Gd(1)-O(16) | 2.379(3) |
| Eu(1)-O(5)  | 2.392(4) | Gd(1)-O(13) | 2.382(3) |
| Eu(1)-O(3)  | 2.402(4) | Gd(1)-O(5)  | 2.393(3) |
| Eu(1)-O(16) | 2.410(4) | Gd(1)-O(20) | 2.397(3) |
| Eu(1)-O(20) | 2.418(4) | Gd(1)-O(3)  | 2.415(3) |
| Eu(1)-O(8)  | 2.487(4) | Gd(1)-O(8)  | 2.475(3) |
| complex 3   |          | complex 4   |          |
| Tb(1)-O(11) | 2.338(5) | Dy(1)-O(11) | 2.333(6) |
| Tb(1)-O(13) | 2.359(5) | Dy(1)-O(13) | 2.361(5) |
| Tb(1)-O(14) | 2.362(5) | Dy(1)-O(14) | 2.366(5) |
| Tb(1)-O(5)  | 2.366(5) | Dy(1)-O(5)  | 2.383(5) |
| Tb(1)-O(16) | 2.381(5) | Dy(1)-O(16) | 2.393(5) |
| Tb(1)-O(3)  | 2.383(5) | Dy(1)-O(3)  | 2.399(5) |
| Tb(1)-O(20) | 2.403(5) | Dy(1)-O(20) | 2.409(5) |
| Tb(1)-O(8)  | 2.458(5) | Dy(1)-O(8)  | 2.466(5) |

**Table S4.** The distortion angles of benzoate for complexes **1–4**

| complex 1                                         |             | complex 2                                         |             |
|---------------------------------------------------|-------------|---------------------------------------------------|-------------|
| MP <sub>(Fe1O5Eu)</sub> -Mp <sub>(benzoate)</sub> | 28.766(766) | MP <sub>(Fe1O5Gd)</sub> -Mp <sub>(benzoate)</sub> | 30.668(224) |
| MP <sub>(Fe2O3Eu)</sub> -Mp <sub>(benzoate)</sub> | 70.899(226) | MP <sub>(Fe2O3Gd)</sub> -Mp <sub>(benzoate)</sub> | 69.105(32)  |
| MP <sub>(Fe3O8Eu)</sub> -Mp <sub>(benzoate)</sub> | 76.264(167) | MP <sub>(Fe3O8Gd)</sub> -Mp <sub>(benzoate)</sub> | 75.680(275) |
| MP <sub>(Fe4O8Eu)</sub> -Mp <sub>(benzoate)</sub> | 80.728(223) | MP <sub>(Fe4O8Gd)</sub> -Mp <sub>(benzoate)</sub> | 79.704(308) |
| complex 3                                         |             | complex 4                                         |             |
| MP <sub>(Fe1O5Tb)</sub> -Mp <sub>(benzoate)</sub> | 30.075(222) | MP <sub>(Fe1O5Dy)</sub> -Mp <sub>(benzoate)</sub> | 28.981(225) |
| MP <sub>(Fe2O3Tb)</sub> -Mp <sub>(benzoate)</sub> | 69.874(329) | MP <sub>(Fe2O3Dy)</sub> -Mp <sub>(benzoate)</sub> | 70.731(341) |
| MP <sub>(Fe3O8Tb)</sub> -Mp <sub>(benzoate)</sub> | 75.246(242) | MP <sub>(Fe3O8Dy)</sub> -Mp <sub>(benzoate)</sub> | 75.634(253) |
| MP <sub>(Fe4O8Tb)</sub> -Mp <sub>(benzoate)</sub> | 79.218(304) | MP <sub>(Fe4O8Dy)</sub> -Mp <sub>(benzoate)</sub> | 79.146(309) |

**Table S5.** Fit parameters for the Fe 2p XP spectra of complexes **1-4**.

| complex   | Binding    | Fe 2p <sub>3/2</sub> | Satellite | Fe 2p <sub>1/2</sub> |
|-----------|------------|----------------------|-----------|----------------------|
|           | Energy(eV) |                      |           |                      |
| complex 1 |            | 711.11               | 717.13    | 724.82               |
| complex 2 |            | 711.50               | 717.97    | 725.40               |
| complex 3 |            | 711.10               | 718.07    | 725.14               |
| complex 4 |            | 711.49               | 718.33    | 725.38               |
