# Supplementary material
Source: MDPI journal article supplement (https://www.mdpi.com/2073-4352/8/5/229)
Supplement: s1 [file s1]

Archive with 9 entries (9 files):
- 1.cif
- 1.pdf
- 2.cif
- 2.pdf
- 3.cif
- 3.pdf
- 4.cif
- 4.pdf
- support information .pdf
