# Supplementary material
Source: MDPI journal article supplement (https://www.mdpi.com/2073-4352/8/5/229)
Supplement: s1 [file s1 › 1.cif]

 
data_170623e
 
_audit_creation_method            'SHELXL-2014/7'
_shelx_SHELXL_version_number      '2014/7'
_chemical_name_systematic         ?
_chemical_name_common             ?
_chemical_melting_point           ?
_chemical_formula_moiety          ?
_chemical_formula_sum
 'C98.50 H79.50 Eu Fe4 N12.50 O20' 
_chemical_formula_weight          2133.60

loop_
 _atom_type_symbol
 _atom_type_description
 _atom_type_scat_dispersion_real
 _atom_type_scat_dispersion_imag
 _atom_type_scat_source
 'C'  'C'   0.0033   0.0016
 'International Tables Vol C Tables 4.2.6.8 and 6.1.1.4'
 'H'  'H'   0.0000   0.0000
 'International Tables Vol C Tables 4.2.6.8 and 6.1.1.4'
 'N'  'N'   0.0061   0.0033
 'International Tables Vol C Tables 4.2.6.8 and 6.1.1.4'
 'O'  'O'   0.0106   0.0060
 'International Tables Vol C Tables 4.2.6.8 and 6.1.1.4'
 'Fe'  'Fe'   0.3463   0.8444
 'International Tables Vol C Tables 4.2.6.8 and 6.1.1.4'
 'Eu'  'Eu'  -0.1578   3.6682
 'International Tables Vol C Tables 4.2.6.8 and 6.1.1.4'
 
_space_group_crystal_system       monoclinic
_space_group_IT_number            14
_space_group_name_H-M_alt         'P 21/n'
_space_group_name_Hall            '-P 2yn'
 
_shelx_space_group_comment
;
The symmetry employed for this shelxl refinement is uniquely defined
by the following loop, which should always be used as a source of
symmetry information in preference to the above space-group names.
They are only intended as comments.
;
 
loop_
 _space_group_symop_operation_xyz
 'x, y, z'
 '-x+1/2, y+1/2, -z+1/2'
 '-x, -y, -z'
 'x-1/2, -y-1/2, z-1/2'
 
_cell_length_a                    14.3022(13)
_cell_length_b                    34.152(3)
_cell_length_c                    19.4743(17)
_cell_angle_alpha                 90
_cell_angle_beta                  106.772(2)
_cell_angle_gamma                 90
_cell_volume                      9107.6(14)
_cell_formula_units_Z             4
_cell_measurement_temperature     298(2)
_cell_measurement_reflns_used     7949 
_cell_measurement_theta_min       2.381 
_cell_measurement_theta_max       22.787
 
_exptl_crystal_description        acicular 
_exptl_crystal_colour             dark 
_exptl_crystal_density_meas       ?
_exptl_crystal_density_method     ?
_exptl_crystal_density_diffrn     1.556          
_exptl_crystal_F_000              4340
_exptl_transmission_factor_min    ?
_exptl_transmission_factor_max    ?
_exptl_crystal_size_max           0.400
_exptl_crystal_size_mid           0.320
_exptl_crystal_size_min           0.280
_exptl_absorpt_coefficient_mu     1.381
_shelx_estimated_absorpt_T_min    0.608
_shelx_estimated_absorpt_T_max    0.698
_exptl_absorpt_correction_type    multi-scan 
_exptl_absorpt_correction_T_min   0.6084 
_exptl_absorpt_correction_T_max   0.8630 
_exptl_absorpt_process_details    sadabs
_exptl_absorpt_special_details    ?
_diffrn_ambient_temperature       298(2)
_diffrn_radiation_wavelength      0.71073
_diffrn_radiation_type            MoK\a
_diffrn_source                    ?
_diffrn_radiation_source          'fine-focus sealed tube' 
_diffrn_measurement_device_type   'CCD area detector' 
_diffrn_measurement_method        'phi and omega scans' 
_diffrn_detector_area_resol_mean  ?
_diffrn_reflns_number             44120
_diffrn_reflns_av_unetI/netI      0.0883
_diffrn_reflns_av_R_equivalents   0.0647
_diffrn_reflns_limit_h_min        -16
_diffrn_reflns_limit_h_max        17
_diffrn_reflns_limit_k_min        -37
_diffrn_reflns_limit_k_max        40
_diffrn_reflns_limit_l_min        -21
_diffrn_reflns_limit_l_max        23
_diffrn_reflns_theta_min          2.184
_diffrn_reflns_theta_max          25.020
_diffrn_reflns_theta_full         25.020
_diffrn_measured_fraction_theta_max   0.997
_diffrn_measured_fraction_theta_full  0.997
_diffrn_reflns_Laue_measured_fraction_max    0.997
_diffrn_reflns_Laue_measured_fraction_full   0.997
_diffrn_reflns_point_group_measured_fraction_max   0.997
_diffrn_reflns_point_group_measured_fraction_full  0.997
_reflns_number_total              16024
_reflns_number_gt                 10074
_reflns_threshold_expression      'I > 2\s(I)'
_reflns_Friedel_coverage          0.000
_reflns_Friedel_fraction_max      .
_reflns_Friedel_fraction_full     .
 
_reflns_special_details
;
 Reflections were merged by SHELXL according to the crystal
 class for the calculation of statistics and refinement.
 
 _reflns_Friedel_fraction is defined as the number of unique
 Friedel pairs measured divided by the number that would be
 possible theoretically, ignoring centric projections and
 systematic absences.
;
 
_computing_data_collection        'Bruker SMART' 
_computing_cell_refinement        'Bruker SMART' 
_computing_data_reduction         'Bruker SHELXTL'
_computing_structure_solution     'SHELXL-2014/7 (Sheldrick, 2014)'
_computing_structure_refinement 'SHELXL-2014/7 (Sheldrick, 2014)'
_computing_molecular_graphics     'Bruker SHELXTL' 
_computing_publication_material   'Bruker SHELXTL'
_refine_special_details           ?
_refine_ls_structure_factor_coef  Fsqd
_refine_ls_matrix_type            full
_refine_ls_weighting_scheme       calc
_refine_ls_weighting_details
'w=1/[\s^2^(Fo^2^)+(0.0802P)^2^] where P=(Fo^2^+2Fc^2^)/3'
_atom_sites_solution_primary      ?
_atom_sites_solution_secondary    ?
_atom_sites_solution_hydrogens    geom
_refine_ls_hydrogen_treatment     constr
_refine_ls_extinction_method      none
_refine_ls_extinction_coef        .
_refine_ls_number_reflns          16024
_refine_ls_number_parameters      1225
_refine_ls_number_restraints      4050
_refine_ls_R_factor_all           0.1026
_refine_ls_R_factor_gt            0.0585
_refine_ls_wR_factor_ref          0.1623
_refine_ls_wR_factor_gt           0.1440
_refine_ls_goodness_of_fit_ref    1.006
_refine_ls_restrained_S_all       6.364
_refine_ls_shift/su_max           0.001
_refine_ls_shift/su_mean          0.000
 
loop_
 _atom_site_label
 _atom_site_type_symbol
 _atom_site_fract_x
 _atom_site_fract_y
 _atom_site_fract_z
 _atom_site_U_iso_or_equiv
 _atom_site_adp_type
 _atom_site_occupancy
 _atom_site_site_symmetry_order  
 _atom_site_calc_flag
 _atom_site_refinement_flags_posn
 _atom_site_refinement_flags_adp
 _atom_site_refinement_flags_occupancy
 _atom_site_disorder_assembly
 _atom_site_disorder_group
N9 N 0.9265(5) 0.7427(2) 0.6276(4) 0.0712(18) Uani 1 1 d D U . . .
N11 N 0.0661(5) 0.7745(2) 0.5692(4) 0.0752(18) Uani 1 1 d D U . . .
H22 H 0.0272 0.7643 0.5906 0.090 Uiso 1 1 calc R U . . .
N12 N 0.8951(13) 0.4761(8) 0.6389(11) 0.353(6) Uani 1 1 d D U . . .
N22 N 0.5563(13) 0.3724(5) 0.7523(11) 0.240(5) Uani 1 1 d D U . . .
Eu1 Eu 0.47218(2) 0.66667(2) 0.75142(2) 0.03794(12) Uani 1 1 d . U . . .
Fe1 Fe 0.43421(7) 0.58785(3) 0.88201(5) 0.0416(2) Uani 1 1 d . U . . .
Fe2 Fe 0.68982(7) 0.59846(3) 0.77471(5) 0.0428(3) Uani 1 1 d . U . . .
Fe3 Fe 0.20187(7) 0.63980(3) 0.67318(5) 0.0408(2) Uani 1 1 d . U . . .
Fe4 Fe 0.45651(7) 0.64371(3) 0.55637(5) 0.0438(3) Uani 1 1 d . U . . .
N1 N 0.5777(4) 0.62478(15) 0.6352(3) 0.0415(12) Uani 1 1 d . U . . .
N2 N 0.6141(4) 0.59904(16) 0.8488(3) 0.0445(12) Uani 1 1 d . U . . .
N3 N 0.3272(4) 0.59549(15) 0.7871(3) 0.0437(12) Uani 1 1 d . U . . .
N4 N 0.2833(4) 0.64794(16) 0.6029(3) 0.0440(12) Uani 1 1 d . U . . .
N5 N 0.1045(4) 0.63151(16) 0.7418(3) 0.0470(13) Uani 1 1 d . U . . .
N6 N 0.3646(4) 0.56551(17) 0.9598(3) 0.0518(14) Uani 1 1 d . U . . .
N7 N 0.6259(5) 0.53910(19) 0.7416(4) 0.0659(15) Uani 1 1 d . U . . .
N8 N 0.4102(5) 0.57939(19) 0.5368(4) 0.0656(16) Uani 1 1 d . U . . .
N13 N 0.956(2) 0.4661(8) 0.458(2) 0.338(7) Uani 0.5 1 d . U P A 1
O1 O 0.5279(4) 0.63814(14) 0.4887(2) 0.0553(12) Uani 1 1 d . U . . .
O2 O 0.7268(3) 0.59731(14) 0.6837(3) 0.0511(11) Uani 1 1 d . U . . .
O3 O 0.5725(3) 0.62340(12) 0.7058(2) 0.0423(10) Uani 1 1 d . U . . .
O4 O 0.7927(3) 0.57227(14) 0.8435(3) 0.0526(12) Uani 1 1 d . U . . .
O5 O 0.5159(3) 0.60950(13) 0.8245(2) 0.0459(10) Uani 1 1 d . U . . .
O6 O 0.5706(3) 0.58111(13) 0.9474(2) 0.0470(11) Uani 1 1 d . U . . .
O7 O 0.4303(4) 0.53295(14) 0.8544(3) 0.0568(12) Uani 1 1 d . U . . .
O8 O 0.3199(3) 0.63375(12) 0.7579(2) 0.0402(10) Uani 1 1 d . U . . .
O9 O 0.2151(3) 0.58110(13) 0.6805(3) 0.0489(11) Uani 1 1 d . U . . .
O10 O 0.4798(4) 0.70247(14) 0.5610(3) 0.0532(12) Uani 1 1 d . U . . .
O11 O 0.5280(4) 0.71162(14) 0.6787(3) 0.0544(12) Uani 1 1 d . U . . .
O12 O 0.1943(3) 0.69651(13) 0.6982(3) 0.0505(11) Uani 1 1 d . U . . .
O13 O 0.3491(3) 0.71566(13) 0.7181(3) 0.0512(11) Uani 1 1 d . U . . .
O14 O 0.4500(3) 0.68775(13) 0.8622(2) 0.0474(11) Uani 1 1 d . U . . .
O15 O 0.3947(3) 0.63987(14) 0.9178(2) 0.0504(11) Uani 1 1 d . U . . .
O16 O 0.6337(3) 0.68755(13) 0.8184(2) 0.0476(11) Uani 1 1 d . U . . .
O17 O 0.7546(3) 0.65041(14) 0.8039(3) 0.0524(11) Uani 1 1 d . U . . .
O18 O 0.0898(3) 0.64046(14) 0.5920(3) 0.0539(12) Uani 1 1 d . U . . .
O19 O 0.3199(3) 0.65195(15) 0.4968(3) 0.0554(12) Uani 1 1 d . U . . .
O20 O 0.3858(3) 0.64583(13) 0.6311(2) 0.0440(10) Uani 1 1 d . U . . .
C1 C 0.6133(5) 0.6213(2) 0.4925(4) 0.0493(16) Uani 1 1 d . U . . .
C2 C 0.6403(6) 0.6170(2) 0.4289(4) 0.0615(19) Uani 1 1 d . U . . .
H2 H 0.5993 0.6264 0.3859 0.074 Uiso 1 1 calc R U . . .
C3 C 0.7259(6) 0.5991(3) 0.4295(5) 0.071(2) Uani 1 1 d . U . . .
H3 H 0.7421 0.5964 0.3868 0.085 Uiso 1 1 calc R U . . .
C4 C 0.7878(6) 0.5852(2) 0.4911(5) 0.063(2) Uani 1 1 d . U . . .
H4 H 0.8454 0.5729 0.4903 0.076 Uiso 1 1 calc R U . . .
C5 C 0.7653(5) 0.5894(2) 0.5552(4) 0.0529(17) Uani 1 1 d . U . . .
H5 H 0.8088 0.5804 0.5975 0.064 Uiso 1 1 calc R U . . .
C6 C 0.6778(5) 0.60707(19) 0.5569(4) 0.0481(16) Uani 1 1 d . U . . .
C7 C 0.6601(5) 0.61027(19) 0.6284(4) 0.0432(14) Uani 1 1 d . U . . .
C8 C 0.8085(5) 0.5656(2) 0.9138(4) 0.0483(16) Uani 1 1 d . U . . .
C9 C 0.8995(5) 0.5505(2) 0.9534(4) 0.0561(18) Uani 1 1 d . U . . .
H9 H 0.9472 0.5464 0.9303 0.067 Uiso 1 1 calc R U . . .
C10 C 0.9204(6) 0.5417(2) 1.0245(5) 0.068(2) Uani 1 1 d . U . . .
H10 H 0.9812 0.5314 1.0486 0.081 Uiso 1 1 calc R U . . .
C11 C 0.8519(6) 0.5480(2) 1.0609(5) 0.067(2) Uani 1 1 d . U . . .
H11 H 0.8664 0.5424 1.1096 0.081 Uiso 1 1 calc R U . . .
C12 C 0.7605(6) 0.5628(2) 1.0233(4) 0.0563(18) Uani 1 1 d . U . . .
H12 H 0.7143 0.5672 1.0476 0.068 Uiso 1 1 calc R U . . .
C13 C 0.7365(5) 0.57114(19) 0.9496(4) 0.0445(15) Uani 1 1 d . U . . .
C14 C 0.6367(5) 0.58449(19) 0.9139(4) 0.0433(15) Uani 1 1 d . U . . .
C15 C 0.3541(6) 0.5123(2) 0.8165(4) 0.0535(16) Uani 1 1 d . U . . .
C16 C 0.3508(6) 0.4712(2) 0.8289(4) 0.0630(19) Uani 1 1 d . U . . .
H16 H 0.4007 0.4595 0.8645 0.076 Uiso 1 1 calc R U . . .
C17 C 0.2760(7) 0.4492(2) 0.7897(5) 0.074(2) Uani 1 1 d . U . . .
H17 H 0.2760 0.4225 0.7995 0.088 Uiso 1 1 calc R U . . .
C18 C 0.2001(7) 0.4643(2) 0.7359(5) 0.072(2) Uani 1 1 d . U . . .
H18 H 0.1494 0.4485 0.7093 0.087 Uiso 1 1 calc R U . . .
C19 C 0.2028(6) 0.5041(2) 0.7232(4) 0.0626(19) Uani 1 1 d . U . . .
H19 H 0.1531 0.5149 0.6862 0.075 Uiso 1 1 calc R U . . .
C20 C 0.2749(5) 0.5282(2) 0.7623(4) 0.0506(16) Uani 1 1 d . U . . .
C21 C 0.2725(5) 0.57032(19) 0.7423(4) 0.0428(14) Uani 1 1 d . U . . .
C22 C 0.0760(5) 0.6465(2) 0.5222(4) 0.0535(17) Uani 1 1 d . U . . .
C23 C -0.0219(6) 0.6476(3) 0.4788(4) 0.075(2) Uani 1 1 d . U . . .
H23 H -0.0725 0.6434 0.4990 0.090 Uiso 1 1 calc R U . . .
C24 C -0.0418(7) 0.6547(3) 0.4078(5) 0.096(3) Uani 1 1 d . U . . .
H24 H -0.1064 0.6553 0.3794 0.115 Uiso 1 1 calc R U . . .
C25 C 0.0337(7) 0.6612(3) 0.3761(5) 0.103(3) Uani 1 1 d . U . . .
H25 H 0.0200 0.6664 0.3273 0.124 Uiso 1 1 calc R U . . .
C26 C 0.1271(6) 0.6597(3) 0.4189(5) 0.082(2) Uani 1 1 d . U . . .
H26 H 0.1772 0.6636 0.3981 0.099 Uiso 1 1 calc R U . . .
C27 C 0.1520(6) 0.6524(2) 0.4925(4) 0.0562(17) Uani 1 1 d . U . . .
C28 C 0.2561(5) 0.6506(2) 0.5321(4) 0.0483(15) Uani 1 1 d . U . . .
C29 C 0.5018(5) 0.7244(2) 0.6167(4) 0.0484(15) Uani 1 1 d . U . . .
C30 C 0.4961(6) 0.7671(2) 0.6049(4) 0.0555(18) Uani 1 1 d D U . . .
C31 C 0.4640(6) 0.7832(2) 0.5366(5) 0.068(2) Uani 1 1 d D U . . .
H31 H 0.4483 0.7668 0.4967 0.082 Uiso 1 1 calc R U . . .
C32 C 0.4555(8) 0.8230(2) 0.5278(5) 0.088(2) Uani 1 1 d D U . . .
H32 H 0.4325 0.8334 0.4819 0.106 Uiso 1 1 calc R U . . .
C33 C 0.4802(8) 0.8474(3) 0.5852(5) 0.093(3) Uani 1 1 d D U . . .
H33 H 0.4757 0.8744 0.5784 0.111 Uiso 1 1 calc R U . . .
C34 C 0.5118(8) 0.8324(2) 0.6530(5) 0.091(3) Uani 1 1 d D U . . .
H34 H 0.5258 0.8490 0.6925 0.110 Uiso 1 1 calc R U . . .
C35 C 0.5228(7) 0.7924(2) 0.6625(5) 0.076(2) Uani 1 1 d D U . . .
H35 H 0.5486 0.7823 0.7085 0.091 Uiso 1 1 calc R U . . .
C36 C 0.2624(5) 0.7223(2) 0.7159(4) 0.0465(15) Uani 1 1 d . U . . .
C37 C 0.2333(5) 0.7634(2) 0.7292(4) 0.0485(16) Uani 1 1 d D U . . .
C38 C 0.2897(5) 0.7944(2) 0.7232(4) 0.0566(18) Uani 1 1 d D U . . .
H38 H 0.3473 0.7904 0.7112 0.068 Uiso 1 1 calc R U . . .
C39 C 0.2620(6) 0.8319(2) 0.7347(5) 0.071(2) Uani 1 1 d D U . . .
H39 H 0.3001 0.8532 0.7299 0.085 Uiso 1 1 calc R U . . .
C40 C 0.1780(6) 0.8375(2) 0.7534(5) 0.071(2) Uani 1 1 d D U . . .
H40 H 0.1581 0.8628 0.7601 0.086 Uiso 1 1 calc R U . . .
C41 C 0.1230(6) 0.8064(2) 0.7625(4) 0.067(2) Uani 1 1 d D U . . .
H41 H 0.0676 0.8103 0.7775 0.081 Uiso 1 1 calc R U . . .
C42 C 0.1497(5) 0.7695(2) 0.7494(4) 0.0573(17) Uani 1 1 d D U . . .
H42 H 0.1113 0.7483 0.7541 0.069 Uiso 1 1 calc R U . . .
C43 C 0.3999(5) 0.6754(2) 0.9004(4) 0.0458(15) Uani 1 1 d . U . . .
C44 C 0.3391(5) 0.7038(2) 0.9282(4) 0.0486(16) Uani 1 1 d D U . . .
C45 C 0.3429(6) 0.7429(2) 0.9139(4) 0.0620(19) Uani 1 1 d D U . . .
H45 H 0.3863 0.7520 0.8900 0.074 Uiso 1 1 calc R U . . .
C46 C 0.2810(7) 0.7694(3) 0.9353(5) 0.076(2) Uani 1 1 d D U . . .
H46 H 0.2841 0.7960 0.9265 0.091 Uiso 1 1 calc R U . . .
C47 C 0.2170(7) 0.7555(3) 0.9691(5) 0.081(2) Uani 1 1 d D U . . .
H47 H 0.1747 0.7728 0.9818 0.097 Uiso 1 1 calc R U . . .
C48 C 0.2134(6) 0.7168(3) 0.9846(5) 0.076(2) Uani 1 1 d D U . . .
H48 H 0.1698 0.7078 1.0084 0.091 Uiso 1 1 calc R U . . .
C49 C 0.2760(5) 0.6909(2) 0.9644(4) 0.0608(18) Uani 1 1 d D U . . .
H49 H 0.2749 0.6645 0.9756 0.073 Uiso 1 1 calc R U . . .
C50 C 0.7196(5) 0.6831(2) 0.8181(4) 0.0449(15) Uani 1 1 d . U . . .
C51 C 0.7891(5) 0.7163(2) 0.8357(4) 0.0497(16) Uani 1 1 d D U . . .
C52 C 0.7611(6) 0.7522(2) 0.8545(4) 0.0616(19) Uani 1 1 d D U . . .
H52 H 0.6971 0.7561 0.8553 0.074 Uiso 1 1 calc R U . . .
C53 C 0.8283(6) 0.7827(2) 0.8723(5) 0.075(2) Uani 1 1 d D U . . .
H53 H 0.8088 0.8070 0.8852 0.090 Uiso 1 1 calc R U . . .
C54 C 0.9231(6) 0.7775(2) 0.8711(5) 0.073(2) Uani 1 1 d D U . . .
H54 H 0.9680 0.7979 0.8837 0.088 Uiso 1 1 calc R U . . .
C55 C 0.9500(6) 0.7419(2) 0.8509(4) 0.069(2) Uani 1 1 d D U . . .
H55 H 1.0132 0.7382 0.8480 0.083 Uiso 1 1 calc R U . . .
C56 C 0.8844(5) 0.7116(2) 0.8350(4) 0.0583(18) Uani 1 1 d D U . . .
H56 H 0.9048 0.6873 0.8234 0.070 Uiso 1 1 calc R U . . .
C57 C 0.2712(6) 0.5724(2) 0.9535(4) 0.0650(19) Uani 1 1 d . U . . .
H57 H 0.2371 0.5894 0.9176 0.078 Uiso 1 1 calc R U . . .
C58 C 0.2222(7) 0.5558(3) 0.9977(5) 0.081(2) Uani 1 1 d . U . . .
H58 H 0.1563 0.5608 0.9910 0.097 Uiso 1 1 calc R U . . .
C59 C 0.2739(7) 0.5314(3) 1.0521(5) 0.081(2) Uani 1 1 d . U . . .
H59 H 0.2438 0.5203 1.0837 0.097 Uiso 1 1 calc R U . . .
C60 C 0.3699(7) 0.5241(2) 1.0588(5) 0.075(2) Uani 1 1 d . U . . .
H60 H 0.4058 0.5075 1.0947 0.089 Uiso 1 1 calc R U . . .
C61 C 0.4122(6) 0.5411(2) 1.0125(4) 0.0599(18) Uani 1 1 d . U . . .
H61 H 0.4775 0.5356 1.0174 0.072 Uiso 1 1 calc R U . . .
C62 C 0.0277(6) 0.6072(2) 0.7223(4) 0.0630(19) Uani 1 1 d . U . . .
H62 H 0.0137 0.5955 0.6774 0.076 Uiso 1 1 calc R U . . .
C63 C -0.0310(6) 0.5986(2) 0.7641(5) 0.069(2) Uani 1 1 d . U . . .
H63 H -0.0840 0.5818 0.7479 0.082 Uiso 1 1 calc R U . . .
C64 C -0.0098(6) 0.6155(2) 0.8311(5) 0.066(2) Uani 1 1 d . U . . .
H64 H -0.0486 0.6106 0.8611 0.079 Uiso 1 1 calc R U . . .
C65 C 0.0693(6) 0.6394(2) 0.8522(4) 0.0611(19) Uani 1 1 d . U . . .
H65 H 0.0859 0.6507 0.8976 0.073 Uiso 1 1 calc R U . . .
C66 C 0.1250(5) 0.6470(2) 0.8066(4) 0.0552(17) Uani 1 1 d . U . . .
H66 H 0.1786 0.6636 0.8218 0.066 Uiso 1 1 calc R U . . .
C67 C 0.5369(8) 0.5309(3) 0.7278(5) 0.089(2) Uani 1 1 d . U . . .
H67 H 0.4951 0.5513 0.7307 0.107 Uiso 1 1 calc R U . . .
C68 C 0.4947(9) 0.4941(3) 0.7087(6) 0.104(3) Uani 1 1 d . U . . .
H68 H 0.4275 0.4904 0.6953 0.124 Uiso 1 1 calc R U . . .
C69 C 0.5570(12) 0.4648(4) 0.7110(8) 0.143(4) Uani 1 1 d . U . . .
H69 H 0.5336 0.4393 0.7029 0.172 Uiso 1 1 calc R U . . .
C70 C 0.6525(13) 0.4716(4) 0.7250(9) 0.178(4) Uani 1 1 d . U . . .
H70 H 0.6963 0.4520 0.7222 0.213 Uiso 1 1 calc R U . . .
C71 C 0.6819(9) 0.5090(3) 0.7433(6) 0.120(3) Uani 1 1 d . U . . .
H71 H 0.7489 0.5134 0.7587 0.144 Uiso 1 1 calc R U . . .
C72 C 0.3600(7) 0.5612(3) 0.5716(5) 0.086(2) Uani 1 1 d . U . . .
H72 H 0.3493 0.5743 0.6105 0.103 Uiso 1 1 calc R U . . .
C73 C 0.3202(9) 0.5243(3) 0.5573(7) 0.110(3) Uani 1 1 d . U . . .
H73 H 0.2833 0.5135 0.5847 0.132 Uiso 1 1 calc R U . . .
C74 C 0.3361(10) 0.5053(4) 0.5039(8) 0.135(4) Uani 1 1 d . U . . .
H74 H 0.3112 0.4801 0.4930 0.162 Uiso 1 1 calc R U . . .
C75 C 0.3893(10) 0.5221(4) 0.4642(7) 0.136(4) Uani 1 1 d . U . . .
H75 H 0.4036 0.5088 0.4268 0.163 Uiso 1 1 calc R U . . .
C76 C 0.4207(8) 0.5596(3) 0.4815(6) 0.103(3) Uani 1 1 d . U . . .
H76 H 0.4520 0.5721 0.4519 0.123 Uiso 1 1 calc R U . . .
C77 C 0.9194(7) 0.7036(3) 0.6279(5) 0.075(2) Uani 1 1 d . U . . .
H77 H 0.9676 0.6883 0.6177 0.091 Uiso 1 1 calc R U . . .
C78 C 0.8419(7) 0.6859(3) 0.6431(5) 0.074(2) Uani 1 1 d . U . . .
H78 H 0.8366 0.6588 0.6427 0.089 Uiso 1 1 calc R U . . .
C79 C 0.7741(7) 0.7082(3) 0.6585(5) 0.076(2) Uani 1 1 d . U . . .
H79 H 0.7199 0.6967 0.6674 0.091 Uiso 1 1 calc R U . . .
C80 C 0.7842(7) 0.7475(3) 0.6611(5) 0.079(2) Uani 1 1 d . U . . .
H80 H 0.7377 0.7629 0.6731 0.095 Uiso 1 1 calc R U . . .
C81 C 0.8623(8) 0.7646(3) 0.6462(5) 0.084(2) Uani 1 1 d . U . . .
H81 H 0.8701 0.7916 0.6493 0.100 Uiso 1 1 calc R U . . .
C82 C 0.1218(8) 0.7515(3) 0.5471(5) 0.087(2) Uani 1 1 d . U . . .
H82 H 0.1175 0.7246 0.5530 0.104 Uiso 1 1 calc R U . . .
C83 C 0.1874(9) 0.7659(4) 0.5148(6) 0.112(3) Uani 1 1 d . U . . .
H83 H 0.2304 0.7496 0.5006 0.135 Uiso 1 1 calc R U . . .
C84 C 0.1870(9) 0.8045(4) 0.5045(6) 0.110(3) Uani 1 1 d . U . . .
H84 H 0.2278 0.8150 0.4796 0.132 Uiso 1 1 calc R U . . .
C85 C 0.1302(9) 0.8289(3) 0.5288(6) 0.106(3) Uani 1 1 d . U . . .
H85 H 0.1344 0.8559 0.5240 0.127 Uiso 1 1 calc R U . . .
C86 C 0.0641(7) 0.8123(3) 0.5617(5) 0.089(2) Uani 1 1 d . U . . .
H86 H 0.0208 0.8278 0.5774 0.107 Uiso 1 1 calc R U . . .
C87 C 0.5726(16) 0.3783(6) 0.8268(14) 0.237(5) Uani 1 1 d D U . . .
H87 H 0.5197 0.3863 0.8420 0.285 Uiso 1 1 calc R U . . .
C88 C 0.654(2) 0.3735(6) 0.8750(11) 0.254(6) Uani 1 1 d D U . . .
H88 H 0.6590 0.3748 0.9235 0.305 Uiso 1 1 calc R U . . .
C89 C 0.7431(16) 0.3656(6) 0.8494(13) 0.257(6) Uani 1 1 d D U . . .
H89 H 0.8064 0.3657 0.8802 0.309 Uiso 1 1 calc R U . . .
C90 C 0.7232(17) 0.3586(6) 0.7788(15) 0.268(6) Uani 1 1 d D U . . .
H90 H 0.7750 0.3486 0.7643 0.322 Uiso 1 1 calc R U . . .
C91 C 0.6409(19) 0.3637(6) 0.7264(11) 0.235(5) Uani 1 1 d D U . . .
H91 H 0.6371 0.3619 0.6780 0.283 Uiso 1 1 calc R U . . .
C92 C 0.8724(13) 0.4353(8) 0.6447(13) 0.352(7) Uani 1 1 d D U . . .
H92 H 0.8514 0.4190 0.6049 0.422 Uiso 1 1 calc R U . . .
C93 C 0.8845(13) 0.4222(6) 0.7145(15) 0.317(6) Uani 1 1 d D U . . .
H93 H 0.8702 0.3959 0.7189 0.380 Uiso 1 1 calc R U . . .
C94 C 0.9143(14) 0.4426(8) 0.7769(12) 0.319(6) Uani 1 1 d D U . . .
H94 H 0.9192 0.4312 0.8211 0.382 Uiso 1 1 calc R U . . .
C95 C 0.9363(14) 0.4808(7) 0.7702(12) 0.312(6) Uani 1 1 d D U . . .
H95 H 0.9594 0.4961 0.8111 0.374 Uiso 1 1 calc R U . . .
C96 C 0.9247(14) 0.4975(6) 0.7020(16) 0.341(7) Uani 1 1 d D U . . .
H96 H 0.9374 0.5241 0.6992 0.410 Uiso 1 1 calc R U . . .
C97 C 0.955(2) 0.4697(9) 0.528(2) 0.343(7) Uani 1 1 d D U . . .
H97 H 0.9322 0.4495 0.5507 0.412 Uiso 1 1 calc R U . A 1
C98 C 0.956(2) 0.4661(8) 0.458(2) 0.338(7) Uani 0.5 1 d D U P A 2
H98 H 0.9233 0.4464 0.4272 0.406 Uiso 0.5 1 calc R U P A 2
C99 C 1.011(2) 0.4948(13) 0.4371(12) 0.338(9) Uani 1 1 d D U . . .
H99 H 1.0273 0.4900 0.3949 0.405 Uiso 1 1 calc R U . A 1
 
loop_
 _atom_site_aniso_label
 _atom_site_aniso_U_11
 _atom_site_aniso_U_22
 _atom_site_aniso_U_33
 _atom_site_aniso_U_23
 _atom_site_aniso_U_13
 _atom_site_aniso_U_12
N9 0.058(4) 0.080(4) 0.073(4) 0.008(4) 0.015(4) -0.008(4)
N11 0.067(4) 0.082(4) 0.072(4) 0.013(4) 0.012(3) -0.016(4)
N12 0.359(11) 0.264(11) 0.334(11) -0.015(11) -0.060(11) 0.009(11)
N22 0.230(9) 0.197(8) 0.253(10) -0.027(8) 0.004(9) -0.016(8)
Eu1 0.02925(19) 0.0436(2) 0.0423(2) 0.00295(16) 0.01242(14) 0.00093(16)
Fe1 0.0330(6) 0.0512(6) 0.0420(6) 0.0074(4) 0.0128(4) 0.0011(4)
Fe2 0.0332(6) 0.0493(6) 0.0478(6) 0.0057(5) 0.0147(5) 0.0044(4)
Fe3 0.0302(5) 0.0493(6) 0.0427(6) 0.0041(4) 0.0103(4) -0.0015(4)
Fe4 0.0397(6) 0.0523(6) 0.0421(6) 0.0042(5) 0.0162(5) 0.0014(5)
N1 0.041(3) 0.046(3) 0.042(3) 0.002(2) 0.018(2) -0.002(2)
N2 0.028(3) 0.058(3) 0.050(3) 0.007(2) 0.015(2) 0.005(2)
N3 0.036(3) 0.047(3) 0.049(3) 0.006(2) 0.014(2) 0.002(2)
N4 0.034(3) 0.053(3) 0.047(3) 0.004(2) 0.016(2) -0.004(2)
N5 0.034(3) 0.059(3) 0.052(3) 0.002(3) 0.018(3) -0.003(3)
N6 0.043(3) 0.061(3) 0.056(3) 0.014(3) 0.020(3) 0.003(3)
N7 0.057(3) 0.067(3) 0.073(4) -0.003(3) 0.018(3) -0.009(3)
N8 0.069(4) 0.060(3) 0.071(4) -0.004(3) 0.025(3) -0.011(3)
N13 0.322(12) 0.283(12) 0.314(12) -0.021(12) -0.060(12) 0.075(11)
O1 0.058(3) 0.067(3) 0.050(3) 0.008(2) 0.028(2) 0.009(2)
O2 0.040(3) 0.063(3) 0.054(3) 0.002(2) 0.020(2) 0.013(2)
O3 0.039(2) 0.052(2) 0.040(2) 0.0052(19) 0.0189(19) 0.007(2)
O4 0.039(3) 0.064(3) 0.058(3) 0.013(2) 0.020(2) 0.008(2)
O5 0.032(2) 0.057(2) 0.050(2) 0.010(2) 0.0141(19) 0.006(2)
O6 0.039(3) 0.059(3) 0.044(3) 0.009(2) 0.014(2) 0.000(2)
O7 0.053(3) 0.056(3) 0.061(3) 0.007(2) 0.018(2) 0.004(2)
O8 0.035(2) 0.044(2) 0.045(2) 0.0064(19) 0.0149(19) -0.0043(19)
O9 0.044(3) 0.049(2) 0.051(3) 0.002(2) 0.011(2) -0.008(2)
O10 0.061(3) 0.055(3) 0.047(3) 0.010(2) 0.022(2) 0.010(2)
O11 0.052(3) 0.061(3) 0.054(3) 0.009(2) 0.019(2) -0.004(2)
O12 0.037(3) 0.051(2) 0.061(3) 0.007(2) 0.011(2) 0.002(2)
O13 0.034(3) 0.050(2) 0.068(3) 0.007(2) 0.013(2) 0.006(2)
O14 0.043(3) 0.054(3) 0.051(3) -0.003(2) 0.023(2) -0.002(2)
O15 0.043(3) 0.058(3) 0.053(3) -0.001(2) 0.020(2) -0.001(2)
O16 0.036(3) 0.058(3) 0.051(3) -0.001(2) 0.017(2) -0.001(2)
O17 0.039(3) 0.057(3) 0.062(3) -0.005(2) 0.017(2) 0.001(2)
O18 0.035(3) 0.079(3) 0.046(3) 0.006(2) 0.009(2) -0.004(2)
O19 0.043(3) 0.075(3) 0.048(3) 0.006(2) 0.013(2) 0.002(2)
O20 0.032(2) 0.057(2) 0.045(2) 0.002(2) 0.0128(19) 0.005(2)
C1 0.050(4) 0.055(4) 0.052(4) 0.002(3) 0.029(3) -0.006(3)
C2 0.063(5) 0.072(4) 0.060(4) 0.003(4) 0.035(4) 0.004(4)
C3 0.071(5) 0.085(5) 0.067(5) -0.004(4) 0.039(4) 0.002(4)
C4 0.057(4) 0.075(5) 0.072(5) -0.011(4) 0.041(4) 0.001(4)
C5 0.047(4) 0.064(4) 0.053(4) -0.009(3) 0.024(3) -0.006(3)
C6 0.046(4) 0.048(3) 0.056(4) -0.001(3) 0.026(3) -0.005(3)
C7 0.038(3) 0.045(3) 0.048(3) 0.003(3) 0.014(3) -0.003(3)
C8 0.034(3) 0.053(3) 0.055(4) 0.010(3) 0.009(3) 0.001(3)
C9 0.037(4) 0.070(4) 0.061(4) 0.013(4) 0.013(3) 0.009(3)
C10 0.042(4) 0.078(5) 0.073(5) 0.017(4) 0.001(4) 0.013(4)
C11 0.051(4) 0.083(5) 0.060(5) 0.011(4) 0.005(4) 0.014(4)
C12 0.045(4) 0.068(4) 0.056(4) 0.010(3) 0.014(3) 0.003(3)
C13 0.036(3) 0.050(3) 0.047(4) 0.009(3) 0.011(3) 0.007(3)
C14 0.037(3) 0.044(3) 0.049(3) 0.000(3) 0.012(3) 0.000(3)
C15 0.060(4) 0.047(3) 0.059(4) 0.002(3) 0.026(3) -0.003(3)
C16 0.073(5) 0.052(4) 0.070(5) 0.014(4) 0.030(4) 0.005(4)
C17 0.087(5) 0.048(4) 0.086(5) 0.003(4) 0.024(5) -0.012(4)
C18 0.073(5) 0.058(4) 0.079(5) -0.003(4) 0.010(4) -0.019(4)
C19 0.061(4) 0.057(4) 0.066(4) 0.001(3) 0.012(4) -0.009(4)
C20 0.055(4) 0.049(3) 0.052(4) -0.001(3) 0.023(3) -0.005(3)
C21 0.039(3) 0.046(3) 0.046(3) 0.004(3) 0.018(3) -0.002(3)
C22 0.035(3) 0.069(4) 0.050(4) 0.006(3) 0.003(3) -0.004(3)
C23 0.043(4) 0.119(6) 0.053(5) 0.011(4) -0.002(4) -0.013(4)
C24 0.052(5) 0.160(6) 0.065(5) 0.021(5) 0.001(4) -0.011(5)
C25 0.065(5) 0.174(7) 0.062(5) 0.024(5) 0.003(4) -0.010(5)
C26 0.050(4) 0.140(5) 0.054(4) 0.018(4) 0.011(4) -0.016(4)
C27 0.044(4) 0.082(4) 0.041(4) 0.005(3) 0.008(3) 0.001(3)
C28 0.044(3) 0.060(3) 0.044(3) 0.008(3) 0.017(3) -0.007(3)
C29 0.042(3) 0.056(3) 0.053(4) 0.011(3) 0.022(3) -0.002(3)
C30 0.056(4) 0.055(4) 0.062(4) -0.001(3) 0.027(3) -0.005(3)
C31 0.083(5) 0.053(4) 0.071(5) 0.009(4) 0.028(4) 0.001(4)
C32 0.102(6) 0.074(5) 0.086(5) 0.024(4) 0.025(5) 0.006(5)
C33 0.118(7) 0.059(5) 0.099(6) 0.003(5) 0.027(6) 0.000(5)
C34 0.122(6) 0.067(5) 0.089(6) -0.007(4) 0.038(5) -0.003(5)
C35 0.090(5) 0.069(4) 0.071(5) 0.003(4) 0.027(4) -0.005(4)
C36 0.039(3) 0.052(3) 0.045(3) 0.013(3) 0.008(3) -0.001(3)
C37 0.046(4) 0.050(3) 0.050(4) 0.004(3) 0.014(3) 0.005(3)
C38 0.044(4) 0.058(4) 0.066(4) 0.000(3) 0.013(3) -0.001(3)
C39 0.065(5) 0.057(4) 0.082(5) -0.006(4) 0.009(4) -0.005(4)
C40 0.072(5) 0.065(5) 0.073(5) -0.012(4) 0.015(4) 0.017(4)
C41 0.063(4) 0.066(4) 0.074(4) -0.004(4) 0.022(4) 0.011(4)
C42 0.052(4) 0.062(4) 0.060(4) 0.005(3) 0.019(3) 0.011(3)
C43 0.034(3) 0.059(4) 0.043(3) -0.002(3) 0.010(3) 0.000(3)
C44 0.041(4) 0.060(4) 0.044(4) -0.010(3) 0.010(3) -0.001(3)
C45 0.064(4) 0.063(4) 0.054(4) -0.009(3) 0.010(3) 0.004(4)
C46 0.077(5) 0.073(5) 0.068(5) -0.012(4) 0.007(4) 0.017(4)
C47 0.061(5) 0.102(6) 0.077(5) -0.028(5) 0.014(4) 0.017(5)
C48 0.055(5) 0.102(5) 0.074(5) -0.024(4) 0.023(4) -0.007(4)
C49 0.051(4) 0.077(4) 0.058(4) -0.016(3) 0.021(3) -0.001(4)
C50 0.039(3) 0.057(3) 0.040(3) 0.008(3) 0.014(3) 0.002(3)
C51 0.038(4) 0.061(4) 0.052(4) -0.002(3) 0.016(3) -0.005(3)
C52 0.049(4) 0.065(4) 0.075(4) -0.013(4) 0.025(4) -0.004(4)
C53 0.072(5) 0.067(5) 0.089(5) -0.019(4) 0.028(4) -0.007(4)
C54 0.061(5) 0.072(5) 0.084(5) -0.017(4) 0.018(4) -0.021(4)
C55 0.053(4) 0.082(5) 0.076(5) -0.010(4) 0.022(4) -0.017(4)
C56 0.050(4) 0.059(4) 0.066(4) -0.005(3) 0.016(3) -0.008(3)
C57 0.055(4) 0.072(4) 0.072(4) 0.022(4) 0.026(4) 0.007(4)
C58 0.062(5) 0.093(6) 0.100(6) 0.014(5) 0.042(5) -0.002(4)
C59 0.085(6) 0.080(5) 0.090(6) 0.017(4) 0.045(5) -0.008(5)
C60 0.084(6) 0.063(5) 0.084(5) 0.022(4) 0.036(5) 0.000(4)
C61 0.062(4) 0.060(4) 0.064(4) 0.013(3) 0.027(4) 0.006(3)
C62 0.043(4) 0.082(4) 0.065(4) -0.008(4) 0.018(3) -0.011(4)
C63 0.041(4) 0.083(5) 0.084(5) -0.001(4) 0.022(4) -0.022(4)
C64 0.048(4) 0.078(5) 0.077(5) 0.014(4) 0.027(4) 0.000(4)
C65 0.054(4) 0.078(5) 0.059(4) 0.000(4) 0.028(4) 0.004(4)
C66 0.041(4) 0.068(4) 0.060(4) -0.001(3) 0.021(3) -0.004(3)
C67 0.084(5) 0.083(4) 0.106(5) -0.025(4) 0.038(4) -0.012(4)
C68 0.102(5) 0.100(5) 0.114(5) -0.016(5) 0.042(4) -0.027(5)
C69 0.150(7) 0.105(6) 0.162(7) -0.009(6) 0.025(7) -0.011(6)
C70 0.175(7) 0.120(6) 0.201(7) -0.025(6) -0.005(7) 0.007(7)
C71 0.110(6) 0.078(5) 0.150(6) -0.018(5) 0.003(5) 0.016(4)
C72 0.093(4) 0.075(4) 0.097(4) -0.006(4) 0.038(4) -0.015(4)
C73 0.119(6) 0.091(6) 0.131(6) -0.011(5) 0.053(5) -0.033(5)
C74 0.147(8) 0.112(7) 0.145(8) -0.032(6) 0.042(7) -0.053(6)
C75 0.166(8) 0.110(7) 0.138(7) -0.035(6) 0.055(7) -0.050(6)
C76 0.122(6) 0.091(5) 0.102(5) -0.016(5) 0.045(5) -0.031(5)
C77 0.071(5) 0.072(5) 0.085(5) 0.001(4) 0.025(4) 0.003(4)
C78 0.070(5) 0.070(4) 0.082(5) 0.003(4) 0.020(4) -0.009(4)
C79 0.066(4) 0.088(4) 0.070(4) 0.008(4) 0.016(4) -0.009(4)
C80 0.065(5) 0.098(5) 0.076(5) 0.003(4) 0.023(4) 0.011(4)
C81 0.079(6) 0.082(5) 0.084(6) 0.004(5) 0.015(5) 0.004(5)
C82 0.087(5) 0.089(5) 0.084(5) 0.001(4) 0.023(4) -0.005(4)
C83 0.116(7) 0.129(7) 0.108(6) -0.004(6) 0.058(6) -0.008(6)
C84 0.111(6) 0.128(7) 0.095(6) 0.024(6) 0.037(5) -0.020(6)
C85 0.100(7) 0.103(6) 0.099(6) 0.032(5) 0.003(6) -0.015(6)
C86 0.073(5) 0.095(5) 0.090(5) 0.015(5) 0.009(4) 0.004(5)
C87 0.230(10) 0.197(9) 0.243(11) -0.024(9) 0.001(10) -0.017(9)
C88 0.238(12) 0.210(9) 0.266(11) -0.035(10) -0.006(11) 0.006(11)
C89 0.237(11) 0.222(10) 0.269(12) -0.039(10) 0.004(11) -0.004(10)
C90 0.256(11) 0.225(9) 0.267(11) -0.030(10) -0.015(10) 0.017(9)
C91 0.216(10) 0.194(8) 0.259(10) -0.039(8) 0.009(9) 0.008(9)
C92 0.361(11) 0.259(11) 0.333(12) -0.015(11) -0.061(11) 0.020(11)
C93 0.325(10) 0.234(9) 0.300(11) -0.013(9) -0.054(10) 0.024(9)
C94 0.324(10) 0.227(10) 0.308(11) -0.026(10) -0.061(11) 0.021(10)
C95 0.316(10) 0.230(10) 0.299(11) -0.009(10) -0.055(10) 0.011(10)
C96 0.344(11) 0.264(11) 0.320(12) -0.030(11) -0.058(11) 0.012(10)
C97 0.334(11) 0.276(12) 0.323(12) -0.026(12) -0.058(12) 0.052(11)
C98 0.322(12) 0.283(12) 0.314(12) -0.021(12) -0.060(12) 0.075(11)
C99 0.313(15) 0.279(16) 0.318(15) -0.028(14) -0.071(14) 0.065(14)
 
_geom_special_details
;
 All esds (except the esd in the dihedral angle between two l.s. planes)
 are estimated using the full covariance matrix.  The cell esds are taken
 into account individually in the estimation of esds in distances, angles
 and torsion angles; correlations between esds in cell parameters are only
 used when they are defined by crystal symmetry.  An approximate (isotropic)
 treatment of cell esds is used for estimating esds involving l.s. planes.
;
 
loop_
 _geom_bond_atom_site_label_1
 _geom_bond_atom_site_label_2
 _geom_bond_distance
 _geom_bond_site_symmetry_2
 _geom_bond_publ_flag
N9 C81 1.312(11) . ?
N9 C77 1.341(10) . ?
N11 C82 1.282(11) . ?
N11 C86 1.299(11) . ?
N12 C96 1.387(16) . ?
N12 C92 1.443(16) . ?
N22 C87 1.41(2) . ?
N22 C91 1.47(2) . ?
Eu1 O11 2.377(5) . ?
Eu1 O13 2.379(4) . ?
Eu1 O14 2.381(4) . ?
Eu1 O5 2.390(4) . ?
Eu1 O3 2.401(4) . ?
Eu1 O16 2.410(5) . ?
Eu1 O20 2.419(4) . ?
Eu1 O8 2.487(4) . ?
Fe1 O7 1.947(5) . ?
Fe1 O5 1.981(4) . ?
Fe1 O6 2.012(5) . ?
Fe1 O15 2.047(5) . ?
Fe1 N3 2.048(6) . ?
Fe1 N6 2.176(5) . ?
Fe2 O4 1.904(5) . ?
Fe2 O2 1.991(5) . ?
Fe2 O17 2.007(5) . ?
Fe2 O3 2.011(4) . ?
Fe2 N2 2.039(5) . ?
Fe2 N7 2.241(7) . ?
Fe3 O18 1.899(5) . ?
Fe3 O8 2.002(4) . ?
Fe3 O12 2.007(5) . ?
Fe3 O9 2.015(4) . ?
Fe3 N4 2.057(5) . ?
Fe3 N5 2.209(5) . ?
Fe4 O1 1.896(4) . ?
Fe4 O19 1.983(5) . ?
Fe4 O20 1.998(4) . ?
Fe4 O10 2.032(5) . ?
Fe4 N1 2.060(6) . ?
Fe4 N8 2.294(6) . ?
N1 C7 1.319(8) . ?
N1 O3 1.400(6) . ?
N2 C14 1.312(8) . ?
N2 O5 1.394(6) . ?
N3 C21 1.310(8) . ?
N3 O8 1.417(6) . ?
N4 C28 1.322(8) . ?
N4 O20 1.411(7) . ?
N5 C66 1.322(9) . ?
N5 C62 1.341(9) . ?
N6 C57 1.328(9) . ?
N6 C61 1.346(9) . ?
N7 C67 1.255(11) . ?
N7 C71 1.298(11) . ?
N8 C72 1.282(10) . ?
N8 C76 1.316(11) . ?
N13 C97 1.372(17) . ?
N13 C99 1.387(17) . ?
O1 C1 1.332(8) . ?
O2 C7 1.294(8) . ?
O4 C8 1.340(8) . ?
O6 C14 1.300(8) . ?
O7 C15 1.329(9) . ?
O9 C21 1.300(8) . ?
O10 C29 1.280(8) . ?
O11 C29 1.235(8) . ?
O12 C36 1.284(8) . ?
O13 C36 1.249(8) . ?
O14 C43 1.247(8) . ?
O15 C43 1.267(8) . ?
O16 C50 1.240(8) . ?
O17 C50 1.285(8) . ?
O18 C22 1.332(8) . ?
O19 C28 1.291(8) . ?
C1 C2 1.408(9) . ?
C1 C6 1.412(10) . ?
C2 C3 1.366(11) . ?
C3 C4 1.353(11) . ?
C4 C5 1.383(9) . ?
C5 C6 1.398(9) . ?
C6 C7 1.490(9) . ?
C8 C9 1.404(9) . ?
C8 C13 1.415(9) . ?
C9 C10 1.362(10) . ?
C10 C11 1.382(11) . ?
C11 C12 1.396(10) . ?
C12 C13 1.405(9) . ?
C13 C14 1.469(9) . ?
C15 C20 1.415(10) . ?
C15 C16 1.427(10) . ?
C16 C17 1.351(11) . ?
C17 C18 1.373(11) . ?
C18 C19 1.384(10) . ?
C19 C20 1.368(10) . ?
C20 C21 1.487(9) . ?
C22 C27 1.386(10) . ?
C22 C23 1.412(10) . ?
C23 C24 1.352(11) . ?
C24 C25 1.408(13) . ?
C25 C26 1.356(12) . ?
C26 C27 1.396(10) . ?
C27 C28 1.468(10) . ?
C29 C30 1.478(10) . ?
C30 C35 1.378(9) . ?
C30 C31 1.389(9) . ?
C31 C32 1.371(9) . ?
C32 C33 1.358(11) . ?
C33 C34 1.365(11) . ?
C34 C35 1.383(10) . ?
C36 C37 1.509(9) . ?
C37 C38 1.356(9) . ?
C37 C42 1.378(9) . ?
C38 C39 1.378(9) . ?
C39 C40 1.365(10) . ?
C40 C41 1.363(10) . ?
C41 C42 1.361(9) . ?
C43 C44 1.504(9) . ?
C44 C49 1.367(9) . ?
C44 C45 1.367(9) . ?
C45 C46 1.410(9) . ?
C46 C47 1.356(10) . ?
C47 C48 1.361(10) . ?
C48 C49 1.394(9) . ?
C50 C51 1.481(9) . ?
C51 C52 1.373(9) . ?
C51 C56 1.376(9) . ?
C52 C53 1.394(9) . ?
C53 C54 1.374(10) . ?
C54 C55 1.367(10) . ?
C55 C56 1.371(9) . ?
C57 C58 1.378(10) . ?
C58 C59 1.382(12) . ?
C59 C60 1.364(12) . ?
C60 C61 1.352(10) . ?
C62 C63 1.359(10) . ?
C63 C64 1.377(11) . ?
C64 C65 1.360(11) . ?
C65 C66 1.379(9) . ?
C67 C68 1.396(12) . ?
C68 C69 1.333(16) . ?
C69 C70 1.333(19) . ?
C70 C71 1.359(16) . ?
C72 C73 1.376(12) . ?
C73 C74 1.301(14) . ?
C74 C75 1.359(15) . ?
C75 C76 1.365(13) . ?
C77 C78 1.367(11) . ?
C78 C79 1.333(11) . ?
C79 C80 1.346(11) . ?
C80 C81 1.364(12) . ?
C82 C83 1.362(13) . ?
C83 C84 1.334(15) . ?
C84 C85 1.341(15) . ?
C85 C86 1.406(14) . ?
C87 C88 1.28(2) . ?
C88 C89 1.52(3) . ?
C89 C90 1.34(3) . ?
C90 C91 1.33(2) . ?
C92 C93 1.394(16) . ?
C93 C94 1.358(16) . ?
C94 C95 1.357(16) . ?
C95 C96 1.411(16) . ?
C97 C98 1.372(17) . ?
C97 C99 1.411(13) 3_766 ?
C98 C99 1.387(17) . ?
C99 C97 1.411(13) 3_766 ?
 
loop_
 _geom_angle_atom_site_label_1
 _geom_angle_atom_site_label_2
 _geom_angle_atom_site_label_3
 _geom_angle
 _geom_angle_site_symmetry_1
 _geom_angle_site_symmetry_3
 _geom_angle_publ_flag
C81 N9 C77 120.4(8) . . ?
C82 N11 C86 124.6(9) . . ?
C96 N12 C92 117.3(16) . . ?
C87 N22 C91 118.2(16) . . ?
O11 Eu1 O13 74.49(16) . . ?
O11 Eu1 O14 120.00(16) . . ?
O13 Eu1 O14 75.68(16) . . ?
O11 Eu1 O5 143.80(15) . . ?
O13 Eu1 O5 141.50(15) . . ?
O14 Eu1 O5 77.77(15) . . ?
O11 Eu1 O3 80.68(15) . . ?
O13 Eu1 O3 143.71(16) . . ?
O14 Eu1 O3 140.47(15) . . ?
O5 Eu1 O3 68.64(14) . . ?
O11 Eu1 O16 72.38(16) . . ?
O13 Eu1 O16 117.23(16) . . ?
O14 Eu1 O16 77.14(15) . . ?
O5 Eu1 O16 82.78(15) . . ?
O3 Eu1 O16 78.51(15) . . ?
O11 Eu1 O20 77.18(16) . . ?
O13 Eu1 O20 79.16(16) . . ?
O14 Eu1 O20 143.36(15) . . ?
O5 Eu1 O20 108.00(15) . . ?
O3 Eu1 O20 69.72(14) . . ?
O16 Eu1 O20 138.87(14) . . ?
O11 Eu1 O8 140.50(16) . . ?
O13 Eu1 O8 75.03(14) . . ?
O14 Eu1 O8 75.11(15) . . ?
O5 Eu1 O8 71.52(14) . . ?
O3 Eu1 O8 111.48(14) . . ?
O16 Eu1 O8 145.41(14) . . ?
O20 Eu1 O8 72.92(14) . . ?
O7 Fe1 O5 100.22(19) . . ?
O7 Fe1 O6 90.6(2) . . ?
O5 Fe1 O6 77.22(18) . . ?
O7 Fe1 O15 160.3(2) . . ?
O5 Fe1 O15 97.73(18) . . ?
O6 Fe1 O15 101.33(19) . . ?
O7 Fe1 N3 85.3(2) . . ?
O5 Fe1 N3 81.4(2) . . ?
O6 Fe1 N3 157.2(2) . . ?
O15 Fe1 N3 89.4(2) . . ?
O7 Fe1 N6 82.7(2) . . ?
O5 Fe1 N6 170.9(2) . . ?
O6 Fe1 N6 94.2(2) . . ?
O15 Fe1 N6 80.8(2) . . ?
N3 Fe1 N6 107.5(2) . . ?
O4 Fe2 O2 105.5(2) . . ?
O4 Fe2 O17 90.9(2) . . ?
O2 Fe2 O17 92.9(2) . . ?
O4 Fe2 O3 174.68(19) . . ?
O2 Fe2 O3 78.44(18) . . ?
O17 Fe2 O3 92.46(19) . . ?
O4 Fe2 N2 88.1(2) . . ?
O2 Fe2 N2 164.2(2) . . ?
O17 Fe2 N2 95.0(2) . . ?
O3 Fe2 N2 87.5(2) . . ?
O4 Fe2 N7 86.9(2) . . ?
O2 Fe2 N7 85.2(2) . . ?
O17 Fe2 N7 176.6(2) . . ?
O3 Fe2 N7 89.9(2) . . ?
N2 Fe2 N7 87.5(2) . . ?
O18 Fe3 O8 174.7(2) . . ?
O18 Fe3 O12 95.7(2) . . ?
O8 Fe3 O12 89.52(18) . . ?
O18 Fe3 O9 96.3(2) . . ?
O8 Fe3 O9 78.42(18) . . ?
O12 Fe3 O9 162.46(19) . . ?
O18 Fe3 N4 87.1(2) . . ?
O8 Fe3 N4 93.3(2) . . ?
O12 Fe3 N4 96.4(2) . . ?
O9 Fe3 N4 97.0(2) . . ?
O18 Fe3 N5 88.6(2) . . ?
O8 Fe3 N5 91.00(19) . . ?
O12 Fe3 N5 83.7(2) . . ?
O9 Fe3 N5 83.9(2) . . ?
N4 Fe3 N5 175.7(2) . . ?
O1 Fe4 O19 104.2(2) . . ?
O1 Fe4 O20 175.7(2) . . ?
O19 Fe4 O20 78.48(19) . . ?
O1 Fe4 O10 90.9(2) . . ?
O19 Fe4 O10 90.4(2) . . ?
O20 Fe4 O10 92.45(18) . . ?
O1 Fe4 N1 88.9(2) . . ?
O19 Fe4 N1 162.8(2) . . ?
O20 Fe4 N1 87.86(19) . . ?
O10 Fe4 N1 100.7(2) . . ?
O1 Fe4 N8 88.6(2) . . ?
O19 Fe4 N8 81.4(2) . . ?
O20 Fe4 N8 88.5(2) . . ?
O10 Fe4 N8 171.4(2) . . ?
N1 Fe4 N8 87.9(2) . . ?
C7 N1 O3 112.8(5) . . ?
C7 N1 Fe4 128.9(5) . . ?
O3 N1 Fe4 118.1(4) . . ?
C14 N2 O5 111.6(5) . . ?
C14 N2 Fe2 130.4(5) . . ?
O5 N2 Fe2 116.8(4) . . ?
C21 N3 O8 112.2(5) . . ?
C21 N3 Fe1 131.6(5) . . ?
O8 N3 Fe1 115.4(4) . . ?
C28 N4 O20 111.7(5) . . ?
C28 N4 Fe3 130.6(5) . . ?
O20 N4 Fe3 117.3(4) . . ?
C66 N5 C62 117.1(6) . . ?
C66 N5 Fe3 121.4(5) . . ?
C62 N5 Fe3 121.1(5) . . ?
C57 N6 C61 117.0(6) . . ?
C57 N6 Fe1 121.6(5) . . ?
C61 N6 Fe1 121.1(5) . . ?
C67 N7 C71 114.1(9) . . ?
C67 N7 Fe2 124.6(7) . . ?
C71 N7 Fe2 120.8(7) . . ?
C72 N8 C76 113.4(8) . . ?
C72 N8 Fe4 123.7(6) . . ?
C76 N8 Fe4 122.2(6) . . ?
C97 N13 C99 113.3(18) . . ?
C1 O1 Fe4 132.4(4) . . ?
C7 O2 Fe2 114.3(4) . . ?
N1 O3 Fe2 113.5(3) . . ?
N1 O3 Eu1 123.3(3) . . ?
Fe2 O3 Eu1 119.12(19) . . ?
C8 O4 Fe2 131.9(4) . . ?
N2 O5 Fe1 114.4(3) . . ?
N2 O5 Eu1 118.5(3) . . ?
Fe1 O5 Eu1 123.1(2) . . ?
C14 O6 Fe1 112.6(4) . . ?
C15 O7 Fe1 128.2(5) . . ?
N3 O8 Fe3 111.9(3) . . ?
N3 O8 Eu1 118.2(3) . . ?
Fe3 O8 Eu1 117.01(17) . . ?
C21 O9 Fe3 111.6(4) . . ?
C29 O10 Fe4 127.7(4) . . ?
C29 O11 Eu1 138.7(5) . . ?
C36 O12 Fe3 129.6(4) . . ?
C36 O13 Eu1 141.9(4) . . ?
C43 O14 Eu1 133.5(4) . . ?
C43 O15 Fe1 134.2(4) . . ?
C50 O16 Eu1 139.2(5) . . ?
C50 O17 Fe2 130.7(4) . . ?
C22 O18 Fe3 133.8(4) . . ?
C28 O19 Fe4 114.3(4) . . ?
N4 O20 Fe4 113.9(3) . . ?
N4 O20 Eu1 123.0(3) . . ?
Fe4 O20 Eu1 119.5(2) . . ?
O1 C1 C2 118.4(7) . . ?
O1 C1 C6 123.5(6) . . ?
C2 C1 C6 118.1(7) . . ?
C3 C2 C1 120.8(8) . . ?
C4 C3 C2 121.3(8) . . ?
C3 C4 C5 120.0(8) . . ?
C4 C5 C6 120.6(8) . . ?
C5 C6 C1 119.1(6) . . ?
C5 C6 C7 116.7(7) . . ?
C1 C6 C7 124.1(6) . . ?
O2 C7 N1 120.8(6) . . ?
O2 C7 C6 118.0(6) . . ?
N1 C7 C6 121.2(6) . . ?
O4 C8 C9 118.7(6) . . ?
O4 C8 C13 123.3(6) . . ?
C9 C8 C13 117.9(7) . . ?
C10 C9 C8 122.4(7) . . ?
C9 C10 C11 120.5(8) . . ?
C10 C11 C12 118.8(8) . . ?
C11 C12 C13 121.7(7) . . ?
C12 C13 C8 118.6(6) . . ?
C12 C13 C14 117.7(6) . . ?
C8 C13 C14 123.7(6) . . ?
O6 C14 N2 120.5(6) . . ?
O6 C14 C13 118.9(6) . . ?
N2 C14 C13 120.6(6) . . ?
O7 C15 C20 124.2(6) . . ?
O7 C15 C16 119.3(7) . . ?
C20 C15 C16 116.5(7) . . ?
C17 C16 C15 120.8(8) . . ?
C16 C17 C18 123.0(8) . . ?
C17 C18 C19 116.6(8) . . ?
C20 C19 C18 123.2(8) . . ?
C19 C20 C15 119.8(7) . . ?
C19 C20 C21 118.7(7) . . ?
C15 C20 C21 121.3(7) . . ?
O9 C21 N3 121.8(6) . . ?
O9 C21 C20 118.5(6) . . ?
N3 C21 C20 119.8(7) . . ?
O18 C22 C27 123.1(7) . . ?
O18 C22 C23 116.4(7) . . ?
C27 C22 C23 120.5(7) . . ?
C24 C23 C22 119.8(8) . . ?
C23 C24 C25 121.0(9) . . ?
C26 C25 C24 117.9(9) . . ?
C25 C26 C27 123.6(8) . . ?
C22 C27 C26 117.2(7) . . ?
C22 C27 C28 125.0(7) . . ?
C26 C27 C28 117.8(7) . . ?
O19 C28 N4 121.1(7) . . ?
O19 C28 C27 118.9(6) . . ?
N4 C28 C27 120.0(6) . . ?
O11 C29 O10 123.6(7) . . ?
O11 C29 C30 119.2(7) . . ?
O10 C29 C30 117.2(6) . . ?
C35 C30 C31 118.1(7) . . ?
C35 C30 C29 120.1(7) . . ?
C31 C30 C29 121.8(7) . . ?
C32 C31 C30 120.2(8) . . ?
C33 C32 C31 120.9(9) . . ?
C32 C33 C34 120.0(9) . . ?
C33 C34 C35 119.6(9) . . ?
C30 C35 C34 121.0(8) . . ?
O13 C36 O12 123.6(7) . . ?
O13 C36 C37 118.9(6) . . ?
O12 C36 C37 117.3(6) . . ?
C38 C37 C42 119.6(7) . . ?
C38 C37 C36 120.8(6) . . ?
C42 C37 C36 119.6(6) . . ?
C37 C38 C39 120.3(7) . . ?
C40 C39 C38 119.3(8) . . ?
C41 C40 C39 120.8(8) . . ?
C42 C41 C40 119.5(8) . . ?
C41 C42 C37 120.4(8) . . ?
O14 C43 O15 124.9(6) . . ?
O14 C43 C44 119.2(6) . . ?
O15 C43 C44 115.9(6) . . ?
C49 C44 C45 119.3(7) . . ?
C49 C44 C43 120.9(7) . . ?
C45 C44 C43 119.7(6) . . ?
C44 C45 C46 120.1(8) . . ?
C47 C46 C45 119.2(8) . . ?
C46 C47 C48 121.4(8) . . ?
C47 C48 C49 119.0(8) . . ?
C44 C49 C48 121.0(8) . . ?
O16 C50 O17 123.8(7) . . ?
O16 C50 C51 120.3(6) . . ?
O17 C50 C51 115.9(6) . . ?
C52 C51 C56 118.2(7) . . ?
C52 C51 C50 121.1(6) . . ?
C56 C51 C50 120.7(6) . . ?
C51 C52 C53 120.1(7) . . ?
C54 C53 C52 120.8(8) . . ?
C55 C54 C53 118.8(8) . . ?
C54 C55 C56 120.3(8) . . ?
C55 C56 C51 121.7(7) . . ?
N6 C57 C58 123.3(8) . . ?
C57 C58 C59 118.1(8) . . ?
C60 C59 C58 119.0(8) . . ?
C61 C60 C59 119.2(9) . . ?
N6 C61 C60 123.3(8) . . ?
N5 C62 C63 124.2(8) . . ?
C62 C63 C64 118.1(8) . . ?
C65 C64 C63 118.4(7) . . ?
C64 C65 C66 120.2(8) . . ?
N5 C66 C65 122.0(7) . . ?
N7 C67 C68 126.3(10) . . ?
C69 C68 C67 115.7(12) . . ?
C68 C69 C70 120.7(14) . . ?
C69 C70 C71 116.0(16) . . ?
N7 C71 C70 126.6(13) . . ?
N8 C72 C73 126.7(10) . . ?
C74 C73 C72 117.6(11) . . ?
C73 C74 C75 119.8(12) . . ?
C74 C75 C76 117.0(12) . . ?
N8 C76 C75 125.2(11) . . ?
N9 C77 C78 120.5(9) . . ?
C79 C78 C77 119.0(9) . . ?
C78 C79 C80 120.0(9) . . ?
C79 C80 C81 120.2(9) . . ?
N9 C81 C80 119.8(9) . . ?
N11 C82 C83 120.7(11) . . ?
C84 C83 C82 117.1(12) . . ?
C83 C84 C85 122.5(11) . . ?
C84 C85 C86 117.7(11) . . ?
N11 C86 C85 117.2(10) . . ?
C88 C87 N22 125(2) . . ?
C87 C88 C89 117(2) . . ?
C90 C89 C88 114.7(18) . . ?
C91 C90 C89 130(2) . . ?
C90 C91 N22 113.5(18) . . ?
C93 C92 N12 114.8(16) . . ?
C94 C93 C92 128.8(18) . . ?
C95 C94 C93 115.4(17) . . ?
C94 C95 C96 120.8(17) . . ?
N12 C96 C95 122.9(17) . . ?
C98 C97 C99 117.2(19) . 3_766 ?
N13 C97 C99 117.2(19) . 3_766 ?
C97 C98 C99 113.3(18) . . ?
C98 C99 C97 128(2) . 3_766 ?
N13 C99 C97 128(2) . 3_766 ?
 
_refine_diff_density_max    0.816
_refine_diff_density_min   -0.670
_refine_diff_density_rms    0.098

_shelx_res_file
;

    170623e.res created by SHELXL-2014/7

TITL 170623e in P2(1)/n
CELL 0.71073  14.3022  34.1521  19.4743  90.000 106.772  90.000
ZERR    4.00   0.0013   0.0027   0.0017   0.000   0.002  0.0000
LATT 1
SYMM            0.5 - X ,    0.50000 + Y ,    0.50000 - Z
SFAC C  H  N  O  Fe Eu
UNIT 394 318 50 80 16 4
OMIT  -1.00  50.04
L.S. 15
ACTA
BOND
FMAP 2
PLAN 20
size 0.40 0.32 0.28
dfix 3.15 0.01 n9 n11
eqiv  $1   -x+2, -y+1, -z+1
dfix 1.39 0.02 c97 c99_$1 c99 c97_$1
dfix 2.37 0.03 c98 c97_$1 c98 c99_$1
dfix 1.39 0.02 c44 c45 c45 c46 c46 c47 c47 c48 c48 c49 c49 c44
dfix 1.39 0.02 c30 c31 c31 c32 c32 c33 c33 c34 c34 c35 c35 c30
dfix 1.39 0.02 c51 c52 c52 c53 c53 c54 c54 c55 c55 c56 c56 c51
dfix 1.39 0.02 c37 c38 c38 c39 c39 c40 c40 c41 c41 c42 c42 c37
dfix 2.37 0.03 n22 c88 c88 c90 c90 n22 c87 c89 c89 c91 c91 c87
dfix 2.37 0.03 n12 c93 c93 c95 c95 n12 c92 c94 c94 c96 c96 c92 c97 c99
dfix 1.39 0.02 n12 c92 c92 c93 c93 c94 c94 c95 c95 c96 c96 n12 c97 c98 c98 c99
flat 0.02 n12 c92 c93 c94 c95 c96
delu 0.002 0.001 n7 c71
simu 0.02 0.04 3.8
exyz n13 c98
eadp n13 c98
TEMP 25
WGHT    0.080200
FVAR       0.07053
N9    3    0.926450    0.742733    0.627567    11.00000    0.05810    0.07983 =
         0.07333    0.00819    0.01544   -0.00790
N11   3    0.066069    0.774536    0.569234    11.00000    0.06671    0.08155 =
         0.07227    0.01259    0.01198   -0.01581
AFIX  43
H22   2    0.027195    0.764258    0.590628    11.00000   -1.20000
AFIX   0
N12   3    0.895079    0.476129    0.638894    11.00000    0.35881    0.26435 =
         0.33395   -0.01543   -0.05983    0.00850
N22   3    0.556306    0.372427    0.752344    11.00000    0.23017    0.19713 =
         0.25295   -0.02743    0.00442   -0.01560
EU1   6    0.472184    0.666666    0.751418    11.00000    0.02925    0.04358 =
         0.04232    0.00295    0.01242    0.00093
FE1   5    0.434207    0.587849    0.882012    11.00000    0.03300    0.05124 =
         0.04195    0.00743    0.01280    0.00107
FE2   5    0.689825    0.598459    0.774711    11.00000    0.03323    0.04929 =
         0.04776    0.00565    0.01472    0.00445
FE3   5    0.201868    0.639805    0.673185    11.00000    0.03023    0.04927 =
         0.04273    0.00405    0.01027   -0.00154
FE4   5    0.456511    0.643708    0.556368    11.00000    0.03974    0.05231 =
         0.04207    0.00416    0.01619    0.00143
N1    3    0.577697    0.624781    0.635182    11.00000    0.04059    0.04565 =
         0.04221    0.00189    0.01820   -0.00237
N2    3    0.614142    0.599036    0.848813    11.00000    0.02758    0.05753 =
         0.05037    0.00705    0.01462    0.00474
N3    3    0.327166    0.595485    0.787077    11.00000    0.03605    0.04677 =
         0.04941    0.00551    0.01406    0.00221
N4    3    0.283317    0.647942    0.602861    11.00000    0.03404    0.05305 =
         0.04725    0.00390    0.01560   -0.00420
N5    3    0.104452    0.631505    0.741754    11.00000    0.03393    0.05859 =
         0.05230    0.00214    0.01839   -0.00333
N6    3    0.364623    0.565508    0.959793    11.00000    0.04264    0.06067 =
         0.05577    0.01409    0.01983    0.00268
N7    3    0.625942    0.539103    0.741560    11.00000    0.05712    0.06708 =
         0.07328   -0.00270    0.01839   -0.00948
N8    3    0.410245    0.579387    0.536784    11.00000    0.06877    0.06040 =
         0.07058   -0.00377    0.02486   -0.01072
PART 1
N13   3    0.956019    0.466082    0.457723    10.50000    0.32208    0.28302 =
         0.31447   -0.02129   -0.06001    0.07550
PART 0
O1    4    0.527944    0.638138    0.488703    11.00000    0.05750    0.06653 =
         0.04997    0.00765    0.02842    0.00903
O2    4    0.726847    0.597313    0.683727    11.00000    0.04022    0.06267 =
         0.05448    0.00234    0.02028    0.01289
O3    4    0.572479    0.623402    0.705822    11.00000    0.03877    0.05246 =
         0.04047    0.00519    0.01888    0.00678
O4    4    0.792709    0.572271    0.843535    11.00000    0.03882    0.06419 =
         0.05827    0.01339    0.01967    0.00807
O5    4    0.515900    0.609497    0.824459    11.00000    0.03235    0.05709 =
         0.04958    0.01022    0.01410    0.00575
O6    4    0.570577    0.581107    0.947444    11.00000    0.03941    0.05896 =
         0.04373    0.00888    0.01369   -0.00002
O7    4    0.430312    0.532951    0.854370    11.00000    0.05346    0.05607 =
         0.06148    0.00706    0.01771    0.00415
O8    4    0.319885    0.633747    0.757894    11.00000    0.03471    0.04370 =
         0.04454    0.00639    0.01494   -0.00426
O9    4    0.215145    0.581104    0.680453    11.00000    0.04419    0.04949 =
         0.05116    0.00191    0.01069   -0.00807
O10   4    0.479765    0.702473    0.560967    11.00000    0.06115    0.05535 =
         0.04694    0.01002    0.02159    0.00991
O11   4    0.527966    0.711619    0.678681    11.00000    0.05153    0.06057 =
         0.05356    0.00904    0.01892   -0.00444
O12   4    0.194309    0.696514    0.698171    11.00000    0.03718    0.05092 =
         0.06126    0.00665    0.01091    0.00183
O13   4    0.349088    0.715657    0.718123    11.00000    0.03407    0.05019 =
         0.06821    0.00735    0.01292    0.00640
O14   4    0.450003    0.687754    0.862220    11.00000    0.04288    0.05434 =
         0.05085   -0.00256    0.02293   -0.00231
O15   4    0.394672    0.639870    0.917776    11.00000    0.04344    0.05805 =
         0.05330   -0.00133    0.01956   -0.00081
O16   4    0.633668    0.687554    0.818407    11.00000    0.03627    0.05794 =
         0.05146   -0.00079    0.01729   -0.00125
O17   4    0.754610    0.650413    0.803945    11.00000    0.03929    0.05690 =
         0.06247   -0.00487    0.01688    0.00140
O18   4    0.089756    0.640455    0.592025    11.00000    0.03516    0.07868 =
         0.04604    0.00586    0.00882   -0.00404
O19   4    0.319893    0.651947    0.496845    11.00000    0.04320    0.07530 =
         0.04769    0.00634    0.01310    0.00196
O20   4    0.385816    0.645835    0.631074    11.00000    0.03176    0.05664 =
         0.04462    0.00237    0.01277    0.00466
C1    1    0.613329    0.621335    0.492534    11.00000    0.04998    0.05491 =
         0.05192    0.00243    0.02884   -0.00619
C2    1    0.640263    0.616980    0.428903    11.00000    0.06338    0.07157 =
         0.06039    0.00311    0.03497    0.00366
AFIX  43
H2    2    0.599250    0.626398    0.385917    11.00000   -1.20000
AFIX   0
C3    1    0.725927    0.599086    0.429549    11.00000    0.07102    0.08548 =
         0.06738   -0.00415    0.03865    0.00205
AFIX  43
H3    2    0.742060    0.596365    0.386825    11.00000   -1.20000
AFIX   0
C4    1    0.787776    0.585240    0.491078    11.00000    0.05650    0.07509 =
         0.07228   -0.01067    0.04136    0.00111
AFIX  43
H4    2    0.845422    0.572900    0.490288    11.00000   -1.20000
AFIX   0
C5    1    0.765281    0.589435    0.555171    11.00000    0.04749    0.06419 =
         0.05333   -0.00914    0.02439   -0.00633
AFIX  43
H5    2    0.808776    0.580434    0.597495    11.00000   -1.20000
AFIX   0
C6    1    0.677824    0.607068    0.556932    11.00000    0.04637    0.04850 =
         0.05647   -0.00087    0.02590   -0.00509
C7    1    0.660100    0.610273    0.628438    11.00000    0.03784    0.04490 =
         0.04800    0.00269    0.01435   -0.00298
C8    1    0.808535    0.565578    0.913761    11.00000    0.03434    0.05298 =
         0.05534    0.01019    0.00948    0.00096
C9    1    0.899461    0.550506    0.953390    11.00000    0.03679    0.07035 =
         0.06081    0.01340    0.01342    0.00935
AFIX  43
H9    2    0.947151    0.546376    0.930277    11.00000   -1.20000
AFIX   0
C10   1    0.920352    0.541717    1.024462    11.00000    0.04212    0.07820 =
         0.07261    0.01725    0.00103    0.01292
AFIX  43
H10   2    0.981157    0.531435    1.048632    11.00000   -1.20000
AFIX   0
C11   1    0.851869    0.547965    1.060898    11.00000    0.05081    0.08287 =
         0.06045    0.01144    0.00469    0.01410
AFIX  43
H11   2    0.866418    0.542405    1.109598    11.00000   -1.20000
AFIX   0
C12   1    0.760467    0.562769    1.023304    11.00000    0.04483    0.06764 =
         0.05596    0.00979    0.01374    0.00270
AFIX  43
H12   2    0.714266    0.567203    1.047640    11.00000   -1.20000
AFIX   0
C13   1    0.736494    0.571141    0.949643    11.00000    0.03568    0.05030 =
         0.04690    0.00892    0.01076    0.00683
C14   1    0.636653    0.584487    0.913897    11.00000    0.03691    0.04390 =
         0.04876    0.00015    0.01185    0.00033
C15   1    0.354075    0.512305    0.816497    11.00000    0.05996    0.04697 =
         0.05924    0.00156    0.02606   -0.00342
C16   1    0.350772    0.471235    0.828944    11.00000    0.07287    0.05232 =
         0.06973    0.01413    0.02998    0.00508
AFIX  43
H16   2    0.400698    0.459514    0.864535    11.00000   -1.20000
AFIX   0
C17   1    0.276024    0.449167    0.789671    11.00000    0.08703    0.04784 =
         0.08579    0.00284    0.02432   -0.01224
AFIX  43
H17   2    0.275977    0.422520    0.799501    11.00000   -1.20000
AFIX   0
C18   1    0.200078    0.464264    0.735884    11.00000    0.07283    0.05807 =
         0.07905   -0.00308    0.01032   -0.01934
AFIX  43
H18   2    0.149397    0.448537    0.709335    11.00000   -1.20000
AFIX   0
C19   1    0.202769    0.504068    0.723178    11.00000    0.06080    0.05682 =
         0.06614    0.00119    0.01178   -0.00914
AFIX  43
H19   2    0.153090    0.514927    0.686237    11.00000   -1.20000
AFIX   0
C20   1    0.274922    0.528221    0.762296    11.00000    0.05478    0.04945 =
         0.05227   -0.00090    0.02313   -0.00541
C21   1    0.272543    0.570318    0.742333    11.00000    0.03950    0.04593 =
         0.04618    0.00434    0.01753   -0.00250
C22   1    0.075993    0.646498    0.522223    11.00000    0.03537    0.06938 =
         0.04956    0.00601    0.00265   -0.00416
C23   1   -0.021876    0.647560    0.478809    11.00000    0.04285    0.11880 =
         0.05281    0.01142   -0.00178   -0.01345
AFIX  43
H23   2   -0.072520    0.643358    0.499030    11.00000   -1.20000
AFIX   0
C24   1   -0.041798    0.654698    0.407766    11.00000    0.05239    0.15978 =
         0.06475    0.02114    0.00078   -0.01138
AFIX  43
H24   2   -0.106401    0.655309    0.379385    11.00000   -1.20000
AFIX   0
C25   1    0.033709    0.661222    0.376067    11.00000    0.06483    0.17379 =
         0.06220    0.02414    0.00308   -0.00999
AFIX  43
H25   2    0.019987    0.666446    0.327294    11.00000   -1.20000
AFIX   0
C26   1    0.127065    0.659651    0.418877    11.00000    0.05000    0.13992 =
         0.05445    0.01759    0.01071   -0.01590
AFIX  43
H26   2    0.177225    0.663584    0.398060    11.00000   -1.20000
AFIX   0
C27   1    0.151974    0.652450    0.492509    11.00000    0.04353    0.08165 =
         0.04085    0.00535    0.00805    0.00068
C28   1    0.256148    0.650637    0.532148    11.00000    0.04396    0.05977 =
         0.04383    0.00795    0.01683   -0.00651
C29   1    0.501830    0.724356    0.616695    11.00000    0.04154    0.05599 =
         0.05273    0.01123    0.02154   -0.00225
C30   1    0.496109    0.767147    0.604927    11.00000    0.05611    0.05456 =
         0.06202   -0.00096    0.02699   -0.00472
C31   1    0.464028    0.783164    0.536589    11.00000    0.08349    0.05337 =
         0.07136    0.00928    0.02832    0.00069
AFIX  43
H31   2    0.448284    0.766845    0.496661    11.00000   -1.20000
AFIX   0
C32   1    0.455501    0.822954    0.527812    11.00000    0.10206    0.07416 =
         0.08626    0.02424    0.02496    0.00626
AFIX  43
H32   2    0.432459    0.833363    0.481882    11.00000   -1.20000
AFIX   0
C33   1    0.480222    0.847388    0.585233    11.00000    0.11849    0.05850 =
         0.09888    0.00336    0.02716   -0.00040
AFIX  43
H33   2    0.475657    0.874350    0.578391    11.00000   -1.20000
AFIX   0
C34   1    0.511768    0.832404    0.652993    11.00000    0.12184    0.06721 =
         0.08950   -0.00740    0.03759   -0.00347
AFIX  43
H34   2    0.525762    0.849016    0.692496    11.00000   -1.20000
AFIX   0
C35   1    0.522786    0.792369    0.662527    11.00000    0.08985    0.06859 =
         0.07100    0.00320    0.02705   -0.00513
AFIX  43
H35   2    0.548587    0.782315    0.708498    11.00000   -1.20000
AFIX   0
C36   1    0.262400    0.722314    0.715877    11.00000    0.03934    0.05236 =
         0.04535    0.01274    0.00837   -0.00069
C37   1    0.233276    0.763449    0.729151    11.00000    0.04623    0.04979 =
         0.04964    0.00418    0.01403    0.00510
C38   1    0.289654    0.794434    0.723152    11.00000    0.04408    0.05806 =
         0.06569    0.00046    0.01259   -0.00097
AFIX  43
H38   2    0.347301    0.790363    0.711154    11.00000   -1.20000
AFIX   0
C39   1    0.261988    0.831924    0.734739    11.00000    0.06527    0.05692 =
         0.08182   -0.00599    0.00857   -0.00482
AFIX  43
H39   2    0.300109    0.853219    0.729878    11.00000   -1.20000
AFIX   0
C40   1    0.178038    0.837465    0.753426    11.00000    0.07214    0.06487 =
         0.07310   -0.01224    0.01468    0.01681
AFIX  43
H40   2    0.158147    0.862755    0.760064    11.00000   -1.20000
AFIX   0
C41   1    0.122961    0.806380    0.762486    11.00000    0.06268    0.06635 =
         0.07440   -0.00383    0.02214    0.01082
AFIX  43
H41   2    0.067571    0.810333    0.777496    11.00000   -1.20000
AFIX   0
C42   1    0.149685    0.769526    0.749391    11.00000    0.05192    0.06218 =
         0.05992    0.00484    0.01929    0.01106
AFIX  43
H42   2    0.111293    0.748297    0.754129    11.00000   -1.20000
AFIX   0
C43   1    0.399875    0.675381    0.900444    11.00000    0.03448    0.05924 =
         0.04258   -0.00199    0.00952   -0.00027
C44   1    0.339141    0.703804    0.928250    11.00000    0.04055    0.06016 =
         0.04357   -0.00975    0.00990   -0.00057
C45   1    0.342871    0.742872    0.913935    11.00000    0.06434    0.06340 =
         0.05375   -0.00867    0.00973    0.00429
AFIX  43
H45   2    0.386263    0.751981    0.890049    11.00000   -1.20000
AFIX   0
C46   1    0.281006    0.769374    0.935344    11.00000    0.07743    0.07314 =
         0.06811   -0.01170    0.00676    0.01689
AFIX  43
H46   2    0.284053    0.796028    0.926452    11.00000   -1.20000
AFIX   0
C47   1    0.217017    0.755520    0.969056    11.00000    0.06065    0.10191 =
         0.07690   -0.02798    0.01375    0.01680
AFIX  43
H47   2    0.174707    0.772847    0.981816    11.00000   -1.20000
AFIX   0
C48   1    0.213406    0.716803    0.984607    11.00000    0.05503    0.10197 =
         0.07397   -0.02433    0.02311   -0.00733
AFIX  43
H48   2    0.169818    0.707754    1.008374    11.00000   -1.20000
AFIX   0
C49   1    0.276049    0.690907    0.964366    11.00000    0.05093    0.07710 =
         0.05787   -0.01645    0.02145   -0.00060
AFIX  43
H49   2    0.274899    0.664478    0.975596    11.00000   -1.20000
AFIX   0
C50   1    0.719602    0.683081    0.818109    11.00000    0.03933    0.05723 =
         0.03962    0.00774    0.01386    0.00207
C51   1    0.789122    0.716259    0.835732    11.00000    0.03766    0.06062 =
         0.05247   -0.00248    0.01570   -0.00540
C52   1    0.761064    0.752182    0.854481    11.00000    0.04898    0.06527 =
         0.07508   -0.01302    0.02517   -0.00386
AFIX  43
H52   2    0.697055    0.756136    0.855292    11.00000   -1.20000
AFIX   0
C53   1    0.828322    0.782740    0.872304    11.00000    0.07196    0.06673 =
         0.08895   -0.01913    0.02824   -0.00730
AFIX  43
H53   2    0.808825    0.806952    0.885191    11.00000   -1.20000
AFIX   0
C54   1    0.923068    0.777534    0.871070    11.00000    0.06123    0.07227 =
         0.08381   -0.01721    0.01848   -0.02140
AFIX  43
H54   2    0.968046    0.797860    0.883707    11.00000   -1.20000
AFIX   0
C55   1    0.950013    0.741922    0.850923    11.00000    0.05269    0.08166 =
         0.07569   -0.00955    0.02173   -0.01687
AFIX  43
H55   2    1.013172    0.738230    0.847991    11.00000   -1.20000
AFIX   0
C56   1    0.884382    0.711620    0.835016    11.00000    0.05012    0.05897 =
         0.06558   -0.00464    0.01630   -0.00812
AFIX  43
H56   2    0.904810    0.687286    0.823435    11.00000   -1.20000
AFIX   0
C57   1    0.271179    0.572426    0.953542    11.00000    0.05548    0.07187 =
         0.07241    0.02169    0.02596    0.00682
AFIX  43
H57   2    0.237072    0.589352    0.917604    11.00000   -1.20000
AFIX   0
C58   1    0.222211    0.555771    0.997662    11.00000    0.06242    0.09298 =
         0.09959    0.01408    0.04222   -0.00201
AFIX  43
H58   2    0.156262    0.560766    0.990989    11.00000   -1.20000
AFIX   0
C59   1    0.273936    0.531441    1.052089    11.00000    0.08451    0.08050 =
         0.09043    0.01700    0.04475   -0.00810
AFIX  43
H59   2    0.243775    0.520255    1.083723    11.00000   -1.20000
AFIX   0
C60   1    0.369891    0.524062    1.058761    11.00000    0.08427    0.06329 =
         0.08358    0.02237    0.03598   -0.00042
AFIX  43
H60   2    0.405795    0.507528    1.094697    11.00000   -1.20000
AFIX   0
C61   1    0.412205    0.541059    1.012533    11.00000    0.06163    0.05968 =
         0.06430    0.01317    0.02749    0.00638
AFIX  43
H61   2    0.477502    0.535580    1.017424    11.00000   -1.20000
AFIX   0
C62   1    0.027694    0.607195    0.722339    11.00000    0.04345    0.08220 =
         0.06481   -0.00822    0.01803   -0.01105
AFIX  43
H62   2    0.013735    0.595472    0.677409    11.00000   -1.20000
AFIX   0
C63   1   -0.031031    0.598582    0.764109    11.00000    0.04111    0.08268 =
         0.08426   -0.00119    0.02182   -0.02194
AFIX  43
H63   2   -0.083999    0.581774    0.747939    11.00000   -1.20000
AFIX   0
C64   1   -0.009806    0.615474    0.831080    11.00000    0.04831    0.07822 =
         0.07714    0.01400    0.02672   -0.00001
AFIX  43
H64   2   -0.048637    0.610626    0.861096    11.00000   -1.20000
AFIX   0
C65   1    0.069322    0.639417    0.852245    11.00000    0.05383    0.07750 =
         0.05927    0.00025    0.02774    0.00408
AFIX  43
H65   2    0.085921    0.650683    0.897643    11.00000   -1.20000
AFIX   0
C66   1    0.125008    0.647031    0.806566    11.00000    0.04081    0.06838 =
         0.06039   -0.00052    0.02069   -0.00361
AFIX  43
H66   2    0.178637    0.663590    0.821833    11.00000   -1.20000
AFIX   0
C67   1    0.536942    0.530895    0.727847    11.00000    0.08380    0.08304 =
         0.10616   -0.02488    0.03797   -0.01194
AFIX  43
H67   2    0.495054    0.551261    0.730688    11.00000   -1.20000
AFIX   0
C68   1    0.494714    0.494148    0.708738    11.00000    0.10249    0.10045 =
         0.11445   -0.01564    0.04170   -0.02682
AFIX  43
H68   2    0.427463    0.490380    0.695270    11.00000   -1.20000
AFIX   0
C69   1    0.557002    0.464806    0.711040    11.00000    0.14978    0.10539 =
         0.16161   -0.00892    0.02493   -0.01101
AFIX  43
H69   2    0.533623    0.439306    0.702854    11.00000   -1.20000
AFIX   0
C70   1    0.652464    0.471613    0.724950    11.00000    0.17531    0.11991 =
         0.20083   -0.02519   -0.00533    0.00735
AFIX  43
H70   2    0.696277    0.451961    0.722248    11.00000   -1.20000
AFIX   0
C71   1    0.681904    0.508966    0.743306    11.00000    0.10978    0.07796 =
         0.15030   -0.01809    0.00346    0.01599
AFIX  43
H71   2    0.748893    0.513394    0.758669    11.00000   -1.20000
AFIX   0
C72   1    0.359959    0.561192    0.571586    11.00000    0.09313    0.07547 =
         0.09660   -0.00647    0.03841   -0.01465
AFIX  43
H72   2    0.349262    0.574252    0.610543    11.00000   -1.20000
AFIX   0
C73   1    0.320176    0.524340    0.557268    11.00000    0.11864    0.09126 =
         0.13081   -0.01072    0.05251   -0.03301
AFIX  43
H73   2    0.283271    0.513478    0.584721    11.00000   -1.20000
AFIX   0
C74   1    0.336094    0.505251    0.503901    11.00000    0.14712    0.11244 =
         0.14459   -0.03218    0.04175   -0.05305
AFIX  43
H74   2    0.311160    0.480128    0.492965    11.00000   -1.20000
AFIX   0
C75   1    0.389256    0.522122    0.464177    11.00000    0.16615    0.10994 =
         0.13839   -0.03480    0.05496   -0.04973
AFIX  43
H75   2    0.403569    0.508751    0.426844    11.00000   -1.20000
AFIX   0
C76   1    0.420703    0.559566    0.481522    11.00000    0.12228    0.09110 =
         0.10215   -0.01605    0.04484   -0.03078
AFIX  43
H76   2    0.452031    0.572067    0.451903    11.00000   -1.20000
AFIX   0
C77   1    0.919406    0.703587    0.627892    11.00000    0.07100    0.07214 =
         0.08499    0.00095    0.02525    0.00252
AFIX  43
H77   2    0.967584    0.688327    0.617687    11.00000   -1.20000
AFIX   0
C78   1    0.841909    0.685945    0.643116    11.00000    0.06972    0.07018 =
         0.08196    0.00311    0.01951   -0.00896
AFIX  43
H78   2    0.836570    0.658802    0.642744    11.00000   -1.20000
AFIX   0
C79   1    0.774094    0.708238    0.658506    11.00000    0.06584    0.08829 =
         0.07036    0.00798    0.01586   -0.00880
AFIX  43
H79   2    0.719869    0.696704    0.667448    11.00000   -1.20000
AFIX   0
C80   1    0.784154    0.747452    0.661095    11.00000    0.06481    0.09825 =
         0.07645    0.00299    0.02314    0.01111
AFIX  43
H80   2    0.737678    0.762929    0.673058    11.00000   -1.20000
AFIX   0
C81   1    0.862283    0.764553    0.646230    11.00000    0.07884    0.08228 =
         0.08430    0.00437    0.01484    0.00384
AFIX  43
H81   2    0.870059    0.791593    0.649311    11.00000   -1.20000
AFIX   0
C82   1    0.121848    0.751460    0.547052    11.00000    0.08734    0.08869 =
         0.08352    0.00053    0.02321   -0.00489
AFIX  43
H82   2    0.117547    0.724568    0.553020    11.00000   -1.20000
AFIX   0
C83   1    0.187375    0.765937    0.514819    11.00000    0.11605    0.12920 =
         0.10809   -0.00408    0.05786   -0.00779
AFIX  43
H83   2    0.230436    0.749613    0.500617    11.00000   -1.20000
AFIX   0
C84   1    0.187041    0.804547    0.504534    11.00000    0.11100    0.12756 =
         0.09531    0.02377    0.03673   -0.02005
AFIX  43
H84   2    0.227775    0.814955    0.479597    11.00000   -1.20000
AFIX   0
C85   1    0.130237    0.828939    0.528762    11.00000    0.10017    0.10258 =
         0.09929    0.03220    0.00346   -0.01478
AFIX  43
H85   2    0.134436    0.855923    0.523951    11.00000   -1.20000
AFIX   0
C86   1    0.064094    0.812338    0.561693    11.00000    0.07333    0.09504 =
         0.09036    0.01500    0.00936    0.00449
AFIX  43
H86   2    0.020774    0.827776    0.577406    11.00000   -1.20000
AFIX   0
C87   1    0.572617    0.378281    0.826805    11.00000    0.22958    0.19665 =
         0.24286   -0.02440    0.00100   -0.01684
AFIX  43
H87   2    0.519660    0.386256    0.842007    11.00000   -1.20000
AFIX   0
C88   1    0.654289    0.373501    0.874954    11.00000    0.23819    0.20979 =
         0.26558   -0.03484   -0.00627    0.00587
AFIX  43
H88   2    0.658954    0.374804    0.923530    11.00000   -1.20000
AFIX   0
C89   1    0.743132    0.365618    0.849381    11.00000    0.23685    0.22197 =
         0.26887   -0.03866    0.00353   -0.00384
AFIX  43
H89   2    0.806394    0.365658    0.880158    11.00000   -1.20000
AFIX   0
C90   1    0.723219    0.358578    0.778792    11.00000    0.25621    0.22478 =
         0.26670   -0.03022   -0.01527    0.01653
AFIX  43
H90   2    0.775033    0.348595    0.764344    11.00000   -1.20000
AFIX   0
C91   1    0.640854    0.363685    0.726418    11.00000    0.21603    0.19372 =
         0.25929   -0.03945    0.00921    0.00811
AFIX  43
H91   2    0.637081    0.361900    0.678039    11.00000   -1.20000
AFIX   0
C92   1    0.872393    0.435303    0.644653    11.00000    0.36141    0.25919 =
         0.33323   -0.01479   -0.06108    0.01953
AFIX  43
H92   2    0.851357    0.419016    0.604898    11.00000   -1.20000
AFIX   0
C93   1    0.884479    0.422195    0.714458    11.00000    0.32522    0.23398 =
         0.30001   -0.01298   -0.05396    0.02384
AFIX  43
H93   2    0.870198    0.395916    0.718905    11.00000   -1.20000
AFIX   0
C94   1    0.914284    0.442587    0.776880    11.00000    0.32434    0.22703 =
         0.30806   -0.02638   -0.06138    0.02084
AFIX  43
H94   2    0.919238    0.431162    0.821138    11.00000   -1.20000
AFIX   0
C95   1    0.936329    0.480780    0.770196    11.00000    0.31569    0.22989 =
         0.29918   -0.00876   -0.05493    0.01149
AFIX  43
H95   2    0.959418    0.496102    0.811076    11.00000   -1.20000
AFIX   0
C96   1    0.924664    0.497546    0.701997    11.00000    0.34383    0.26379 =
         0.31981   -0.03029   -0.05794    0.01235
AFIX  43
H96   2    0.937367    0.524116    0.699243    11.00000   -1.20000
AFIX   0
C97   1    0.954723    0.469658    0.527595    11.00000    0.33450    0.27574 =
         0.32274   -0.02559   -0.05847    0.05225
AFIX  43
H97   2    0.932208    0.449497    0.550750    11.00000   -1.20000
PART 2
AFIX   0
C98   1    0.956019    0.466082    0.457723    10.50000    0.32208    0.28302 =
         0.31447   -0.02129   -0.06001    0.07550
AFIX  43
H98   2    0.923281    0.446370    0.427213    10.50000   -1.20000
PART 0
AFIX   0
C99   1    1.011018    0.494793    0.437105    11.00000    0.31334    0.27894 =
         0.31794   -0.02784   -0.07147    0.06490
AFIX  43
H99   2    1.027285    0.490049    0.394940    11.00000   -1.20000
AFIX   0
hklf 4

REM  170623e in P2(1)/n
REM R1 =  0.0585 for   10074 Fo > 4sig(Fo)  and  0.1026 for all   16024 data
REM   1225 parameters refined using   4050 restraints

END

WGHT      0.0803      0.0000

REM Highest difference peak  0.816,  deepest hole -0.670,  1-sigma level  0.098
Q1    1   0.4561  0.6827  0.7783  11.00000  0.05    0.72
Q2    1   0.4611  0.6803  0.7176  11.00000  0.05    0.69
Q3    1   0.4662  0.6480  0.7744  11.00000  0.05    0.67
Q4    1   1.0354  0.4986  0.7560  11.00000  0.05    0.61
Q5    1   0.5346  0.6669  0.7704  11.00000  0.05    0.61
Q6    1   0.6393  0.3833  0.6425  11.00000  0.05    0.60
Q7    1   0.2393  0.7166  0.5387  11.00000  0.05    0.60
Q8    1   0.4667  0.5485  0.5169  11.00000  0.05    0.57
Q9    1   0.4230  0.6884  0.7017  11.00000  0.05    0.56
Q10   1   0.4199  0.6407  0.7002  11.00000  0.05    0.56
Q11   1   0.5227  0.6882  0.7957  11.00000  0.05    0.55
Q12   1   0.4790  0.6424  0.9462  11.00000  0.05    0.55
Q13   1   0.7447  0.6396  0.8339  11.00000  0.05    0.55
Q14   1   0.4345  0.7465  0.8835  11.00000  0.05    0.54
Q15   1   0.4680  0.6538  0.7123  11.00000  0.05    0.54
Q16   1   0.9575  0.7412  0.6378  11.00000  0.05    0.54
Q17   1   0.5178  0.6437  0.7983  11.00000  0.05    0.52
Q18   1   0.2508  0.6030  0.7253  11.00000  0.05    0.52
Q19   1   0.6878  0.7345  0.7772  11.00000  0.05    0.50
Q20   1   0.6901  0.3830  0.6422  11.00000  0.05    0.48
;
_shelx_res_checksum   92214

_shelx_hkl_file
;
   0   0   2  514.05    5.94
   0   0   3   -0.21    0.62
   0   0   4 1150.16   12.17
   0   0   5    0.40    0.72
   0   0   6  147.21    4.64
   0   0   7   -0.73    1.06
   0   0   8  123.97    4.95
   0   0   9    0.72    0.99
   0   0  10  381.38    9.67
   0   0  11    0.78    1.65
   0   0  12   99.70    5.60
   0   0  13   -0.22    1.19
   0   0  14   59.83    4.73
   0   0  15    2.70    2.48
   0   0  16   91.46    6.51
   0   0  17    1.25    1.85
   0   0  18    0.59    1.83
   0   0  19    1.01    2.46
   0   0  20    0.21    1.87
   0   0  21   -1.44    1.79
   0   0  22    2.43    2.98
   0   0  23    1.57    2.34
   0   0  24    4.73    2.88
   0  -1   2   49.08    1.57
   0   1   2   51.24    1.60
   0  -1   3   79.18    2.44
   0   1   3   81.44    2.46
   0  -1   4   -0.53    0.89
   0   1   4   -0.16    0.62
   0  -1   5   20.15    1.64
   0   1   5   19.57    1.64
   0  -1   6   86.82    3.58
   0   1   6   87.31    3.62
   0  -1   7    0.83    0.90
   0   1   7    0.29    0.80
   0  -1   8   15.38    2.10
   0   1   8   22.42    2.24
   0  -1   9    0.59    1.07
   0   1   9    1.92    1.12
   0  -1  10   14.76    2.45
   0   1  10   11.15    1.97
   0  -1  11   22.41    2.69
   0   1  11   25.92    2.81
   0  -1  12   -0.37    1.75
   0   1  12   -0.80    1.11
   0  -1  13   -1.07    1.24
   0   1  13   -1.27    1.13
   0  -1  14   18.48    3.22
   0   1  14   21.90    3.13
   0  -1  15   13.90    2.88
   0   1  15   11.81    2.74
   0  -1  16    3.64    2.11
   0   1  16    2.82    2.12
   0  -1  17   -1.35    2.30
   0   1  17   -2.62    2.26
   0  -1  18   -1.40    1.56
   0   1  18   -0.73    2.30
   0  -1  19   -0.64    1.66
   0   1  19   -0.72    1.68
   0  -1  20    0.18    2.72
   0   1  20    0.15    2.10
   0  -1  21   -0.39    1.83
   0   1  21   -1.65    2.54
   0  -1  22   -0.67    2.66
   0   1  22    1.32    2.96
   0  -1  23   -0.03    2.22
   0   1  23    0.78    2.29
   0  -1  24    0.72    2.47
   0   1  24    1.11    2.34
   0  -2   2   46.39    1.61
   0   2   2   45.27    1.55
   0  -2   3   34.29    1.63
   0   2   3   38.22    1.75
   0  -2   4  179.55    4.33
   0   2   4  180.13    4.24
   0  -2   5   54.45    2.63
   0   2   5   54.55    2.60
   0  -2   6    1.15    0.87
   0   2   6    2.08    0.90
   0  -2   7    7.92    1.36
   0   2   7    7.45    1.31
   0  -2   8   42.34    3.10
   0   2   8   48.47    3.11
   0  -2   9   43.61    3.37
   0   2   9   39.02    3.09
   0  -2  10   21.16    2.52
   0   2  10   22.62    2.54
   0  -2  11  125.35    5.85
   0   2  11  121.18    5.75
   0  -2  12   40.47    3.85
   0   2  12   49.93    4.02
   0  -2  13    9.15    2.25
   0   2  13   12.02    2.30
   0  -2  14   10.11    2.72
   0   2  14    4.27    1.84
   0  -2  15  148.84    7.59
   0   2  15  143.93    7.53
   0  -2  16    8.56    2.91
   0   2  16    6.75    2.32
   0  -2  17   -0.51    1.60
   0   2  17    0.33    1.71
   0  -2  18    5.15    2.71
   0   2  18    4.32    2.11
   0  -2  19    1.83    2.08
   0   2  19    3.07    2.04
   0  -2  20    1.01    2.77
   0   2  20   -0.73    2.54
   0  -2  21    1.75    2.29
   0   2  21    1.13    2.76
   0  -2  22    2.35    2.90
   0   2  22    0.69    2.30
   0  -2  23    0.96    2.20
   0   2  23   -0.88    2.18
   0  -2  24    2.42    2.57
   0   2  24    3.15    3.47
   0  -3   2  165.36    3.26
   0   3   2  165.86    3.28
   0  -3   3   44.46    1.99
   0   3   3   50.33    2.03
   0  -3   4    7.87    1.23
   0   3   4   10.35    1.32
   0  -3   5   53.52    2.64
   0   3   5   56.13    2.71
   0   3   6    2.06    0.91
   0  -3   7   25.78    2.23
   0   3   7   29.00    2.34
   0  -3   8   63.12    3.70
   0   3   8   69.91    3.78
   0  -3   9   26.88    2.59
   0   3   9   26.20    2.69
   0  -3  10   94.71    4.95
   0   3  10   97.38    5.00
   0  -3  11    3.40    1.60
   0   3  11    5.58    1.69
   0  -3  12    8.59    2.40
   0   3  12   12.33    2.27
   0  -3  13    3.42    1.77
   0   3  13    7.85    1.98
   0  -3  14    2.98    1.82
   0   3  14    5.40    2.30
   0  -3  15   20.98    3.67
   0   3  15   22.26    3.59
   0  -3  16    2.89    1.99
   0   3  16    4.61    2.60
   0  -3  17    4.76    2.20
   0   3  17    7.57    2.80
   0  -3  18    0.65    1.79
   0   3  18   -0.36    2.21
   0  -3  19    4.52    2.37
   0   3  19    3.58    2.76
   0  -3  20    0.61    2.10
   0   3  20   -0.94    2.53
   0  -3  21    0.44    2.08
   0   3  21    2.65    2.32
   0  -3  22   -0.16    2.09
   0   3  22    1.58    2.30
   0  -3  23    0.40    2.21
   0   3  23    0.04    2.30
   0  -3  24    1.39    2.51
   0   3  24    2.36    3.45
   0  -4   2  102.70    2.71
   0   4   2  108.21    2.72
   0  -4   3  242.35    4.73
   0   4   3  266.25    4.98
   0  -4   4   20.61    1.56
   0   4   4   22.04    1.64
   0  -4   5    0.36    0.71
   0   4   5    0.79    0.75
   0  -4   6   52.54    2.87
   0   4   6   56.94    2.96
   0  -4   7    1.91    1.01
   0   4   7    1.15    0.92
   0  -4   8   12.07    1.98
   0   4   8   11.58    1.98
   0  -4   9    2.31    1.23
   0   4   9    3.60    1.33
   0  -4  10    2.21    1.67
   0   4  10    2.96    1.78
   0  -4  11   44.41    3.88
   0   4  11   46.66    3.69
   0  -4  12   31.17    3.63
   0   4  12   32.23    3.31
   0  -4  13   49.38    4.45
   0   4  13   53.06    4.29
   0  -4  14   22.93    3.20
   0   4  14   24.14    3.47
   0  -4  15   21.83    3.34
   0   4  15   23.49    3.33
   0  -4  16   27.80    3.78
   0   4  16   26.68    3.61
   0  -4  17   33.87    4.41
   0   4  17   33.80    4.15
   0  -4  18    0.55    1.84
   0   4  18    1.75    1.97
   0  -4  19   13.57    3.55
   0   4  19   13.16    3.18
   0  -4  20   -0.66    2.01
   0   4  20    1.14    2.07
   0  -4  21    7.61    3.54
   0   4  21   12.98    3.39
   0  -4  22    0.57    2.24
   0   4  22   -3.30    1.81
   0  -4  23    5.20    2.71
   0   4  23    0.05    3.26
   0  -4  24    2.96    3.51
   0   4  24    7.12    3.92
   0   5  -1   28.27    1.41
   0   5   1   26.79    1.36
   0  -5   2  154.86    3.59
   0   5   2  155.10    3.57
   0  -5   3  204.17    4.47
   0   5   3  215.87    4.58
   0  -5   4   19.76    1.62
   0   5   4   19.42    1.59
   0  -5   5   20.81    1.87
   0   5   5   23.02    1.87
   0  -5   6   15.56    1.84
   0   5   6   15.63    1.71
   0  -5   7   33.85    2.67
   0   5   7   34.09    2.63
   0  -5   8   55.70    3.45
   0   5   8   58.83    3.59
   0  -5   9  127.52    5.45
   0   5   9  123.28    5.25
   0  -5  10    4.67    1.53
   0   5  10    5.10    1.54
   0  -5  11   57.33    4.28
   0   5  11   55.34    3.97
   0  -5  12    7.73    2.16
   0   5  12   10.05    2.43
   0  -5  13    1.06    1.57
   0   5  13   -0.32    1.16
   0  -5  14   14.94    3.22
   0   5  14   15.32    2.94
   0  -5  15   -0.72    2.36
   0   5  15   -0.24    1.55
   0  -5  16    8.69    2.61
   0   5  16    6.69    2.36
   0  -5  17    2.53    1.97
   0   5  17   -1.09    2.31
   0  -5  18    3.87    2.15
   0   5  18    4.52    2.81
   0  -5  19    4.74    2.96
   0   5  19    6.92    3.11
   0  -5  20    3.24    2.52
   0   5  20    5.76    3.09
   0  -5  21    1.16    2.92
   0   5  21    2.30    3.02
   0  -5  22   -0.40    1.97
   0   5  22    1.53    3.04
   0  -5  23    0.08    2.36
   0   5  23   -1.32    3.03
   0  -5  24    2.28    3.34
   0   5  24    1.05    3.33
   0   6   0  142.92    3.29
   0   6  -1  305.39    5.08
   0   6   1  309.35    5.01
   0   6  -2  230.51    4.56
   0   6   2  231.71    4.58
   0  -6   3    3.97    1.04
   0   6   3    3.69    0.87
   0  -6   4  479.83    7.92
   0   6   4  528.55    8.27
   0  -6   5   57.12    2.98
   0   6   5   60.19    2.97
   0  -6   6   79.53    3.56
   0   6   6   90.35    3.89
   0  -6   7    1.94    1.21
   0   6   7    1.25    0.95
   0  -6   8   75.63    4.04
   0   6   8   60.13    3.59
   0  -6   9   -0.69    0.99
   0   6   9    1.25    1.19
   0  -6  10   46.43    3.61
   0   6  10   39.82    3.45
   0  -6  11   -1.42    1.77
   0   6  11   -0.35    1.60
   0  -6  12  206.11    8.08
   0   6  12  198.49    7.87
   0  -6  13    0.45    1.55
   0   6  13    1.48    1.43
   0  -6  14   57.38    4.80
   0   6  14   50.92    4.43
   0  -6  15    3.18    1.97
   0   6  15    4.45    1.97
   0  -6  16   53.77    5.00
   0   6  16   49.92    5.01
   0  -6  17    1.98    1.99
   0   6  17    3.00    2.11
   0  -6  18   38.18    4.88
   0   6  18   40.94    4.77
   0  -6  19    2.10    2.20
   0   6  19    3.78    2.31
   0  -6  20   24.46    4.22
   0   6  20   26.83    4.37
   0  -6  21    0.66    2.94
   0   6  21    3.25    3.15
   0  -6  22    3.20    2.57
   0   6  22    4.80    3.38
   0  -6  23   -0.47    2.27
   0   6  23    7.71    3.88
   0  -6  24    2.76    3.41
   0   6  24    3.90    2.73
   0   7   0    1.71    0.80
   0   7  -1 1388.52   13.48
   0   7   1 1381.00   13.29
   0   7  -2   14.24    1.28
   0   7   2   12.62    1.21
   0  -7   3  177.76    4.53
   0   7   3  177.07    4.57
   0  -7   4   66.75    3.01
   0   7   4   63.04    2.88
   0  -7   5   10.11    1.40
   0   7   5    8.56    1.46
   0  -7   6   11.77    1.57
   0   7   6   15.44    1.77
   0  -7   7   14.13    1.98
   0   7   7   11.17    1.88
   0  -7   8    0.97    1.41
   0   7   8    1.37    1.10
   0  -7   9    1.55    1.30
   0   7   9   -0.91    0.96
   0  -7  10    9.30    1.91
   0   7  10    6.96    1.73
   0  -7  11    3.00    1.66
   0   7  11    3.29    1.68
   0  -7  12    7.83    2.17
   0   7  12    8.30    2.09
   0  -7  13    1.90    2.14
   0   7  13    2.23    1.60
   0  -7  14    3.64    2.38
   0   7  14    3.47    1.88
   0  -7  15   -0.54    2.41
   0   7  15    1.02    2.16
   0  -7  16    2.00    2.64
   0   7  16    0.04    1.67
   0  -7  17    9.52    3.13
   0   7  17    5.30    2.42
   0  -7  18    3.45    2.85
   0   7  18    1.02    2.50
   0  -7  19    8.46    2.87
   0   7  19    4.49    2.42
   0  -7  20    7.44    2.91
   0   7  20    7.58    2.94
   0  -7  21    1.31    2.93
   0   7  21    1.12    2.20
   0  -7  22    2.10    2.41
   0   7  22    1.39    2.45
   0  -7  23    2.55    2.64
   0   7  23    1.21    2.35
   0  -7  24   -0.86    3.21
   0   7  24    2.21    2.60
   0   8   0   35.64    1.97
   0   8  -1   45.81    2.23
   0   8   1   43.28    2.15
   0   8  -2   27.34    1.85
   0   8   2   29.05    1.91
   0  -8   3   82.62    3.23
   0   8   3   84.39    3.21
   0  -8   4   95.02    3.63
   0   8   4   94.97    3.67
   0  -8   5   88.38    3.77
   0   8   5   87.94    3.77
   0  -8   6   24.15    2.16
   0   8   6   23.37    2.11
   0  -8   7   92.48    4.25
   0   8   7   95.11    4.34
   0  -8   8   11.70    1.82
   0   8   8   15.20    2.05
   0  -8   9   45.56    3.42
   0   8   9   44.92    3.46
   0  -8  10   23.07    2.73
   0   8  10   23.24    2.74
   0  -8  11  198.84    7.69
   0   8  11  193.98    7.61
   0  -8  12   -1.24    1.90
   0   8  12   -0.16    1.41
   0  -8  13   64.78    4.85
   0   8  13   59.67    4.70
   0  -8  14   21.47    3.20
   0   8  14   21.87    3.22
   0  -8  15   46.94    4.66
   0   8  15   50.06    4.92
   0  -8  16    6.56    2.94
   0   8  16    4.19    2.24
   0  -8  17   25.70    3.86
   0   8  17   34.94    4.67
   0  -8  18   11.13    2.98
   0   8  18   11.50    3.07
   0  -8  19   40.15    4.99
   0   8  19   45.33    5.50
   0  -8  20    2.93    2.37
   0   8  20    8.15    3.50
   0  -8  21   11.59    3.75
   0   8  21   11.93    3.37
   0  -8  22    5.96    3.46
   0   8  22    2.97    2.49
   0  -8  23    0.40    2.37
   0   8  23    1.96    2.65
   0  -8  24    0.04    2.41
   0   8  24    3.54    2.79
   0   9   0    2.36    0.93
   0   9  -1  106.22    3.45
   0   9   1   98.61    3.30
   0   9  -2  502.52    7.93
   0   9   2  488.77    7.81
   0  -9   3    2.05    1.04
   0   9   3    2.88    1.09
   0  -9   4   44.61    2.64
   0   9   4   48.75    2.83
   0  -9   5    7.66    1.50
   0   9   5    5.70    1.41
   0  -9   6   -0.07    0.78
   0   9   6   -0.54    0.80
   0  -9   7   10.21    1.89
   0   9   7   11.29    1.76
   0  -9   8    0.07    0.90
   0   9   8   -0.67    0.93
   0  -9   9    2.37    1.57
   0   9   9    2.24    1.67
   0  -9  10    3.42    1.54
   0   9  10    3.73    1.96
   0  -9  11    6.45    1.92
   0   9  11    3.03    2.16
   0  -9  12    8.79    2.24
   0   9  12    9.15    2.24
   0  -9  13   11.02    2.81
   0   9  13    7.89    2.24
   0  -9  14    4.18    1.95
   0   9  14    4.88    2.14
   0  -9  15    8.04    2.53
   0   9  15    7.80    2.41
   0  -9  16   38.34    4.39
   0   9  16   41.77    4.87
   0  -9  17    2.48    2.08
   0   9  17    6.06    2.48
   0  -9  18    4.20    2.30
   0   9  18    6.17    3.03
   0  -9  19    8.03    2.91
   0   9  19    6.16    2.63
   0  -9  20    5.61    2.76
   0   9  20    1.23    2.10
   0  -9  21    0.38    2.79
   0   9  21    2.60    2.91
   0  -9  22   -0.54    2.93
   0   9  22   -0.19    3.08
   0  -9  23   -0.44    2.12
   0   9  23    0.39    2.86
   0  -9  24   -0.87    2.41
   0   9  24   -0.08    2.38
   0  10   0  290.15    5.93
   0  10  -1  167.49    4.53
   0  10   1  161.82    4.36
   0  10  -2  206.80    5.07
   0  10   2  221.18    5.35
   0  10  -3   -0.08    0.91
   0  10   3    0.89    0.73
   0 -10   4  110.97    4.14
   0  10   4  115.46    4.27
   0 -10   5  216.92    6.08
   0  10   5  230.13    6.48
   0 -10   6   36.31    2.81
   0  10   6   37.90    2.80
   0 -10   7   88.84    4.37
   0  10   7   90.51    4.53
   0 -10   8   40.43    3.25
   0  10   8   45.60    3.35
   0 -10   9   89.90    4.77
   0  10   9   92.71    4.86
   0 -10  10   55.15    4.02
   0  10  10   53.15    3.98
   0 -10  11   14.76    2.70
   0  10  11   13.56    2.40
   0 -10  12   72.47    5.03
   0  10  12   68.46    5.04
   0 -10  13   18.60    2.90
   0  10  13   23.47    3.20
   0 -10  14   24.67    3.69
   0  10  14   27.39    3.53
   0 -10  15   48.13    4.99
   0  10  15   45.57    4.59
   0 -10  16   12.83    3.04
   0  10  16   13.89    3.30
   0 -10  17   17.40    3.38
   0  10  17   13.88    3.03
   0 -10  18   14.75    3.28
   0  10  18   15.50    3.26
   0 -10  19   13.15    3.28
   0  10  19   10.09    3.39
   0 -10  20   20.02    3.87
   0  10  20   15.57    3.54
   0 -10  21   11.62    3.27
   0  10  21    9.36    3.21
   0 -10  22    0.95    3.02
   0  10  22    1.57    2.32
   0 -10  23    2.85    3.36
   0  10  23    2.19    3.14
   0 -10  24    1.08    2.60
   0  10  24   -0.47    3.14
   0  11  -1  165.66    4.68
   0  11   1  162.54    4.61
   0  11  -2   13.81    1.62
   0  11   2   14.71    1.54
   0  11  -3   74.65    3.32
   0  11   3   74.74    3.43
   0 -11   4    5.24    1.36
   0  11   4    7.08    1.30
   0 -11   5    0.15    1.09
   0  11   5   -1.06    1.12
   0 -11   6    2.35    1.34
   0  11   6    1.98    1.17
   0 -11   7    0.71    1.00
   0  11   7    0.51    1.37
   0 -11   8    2.94    1.62
   0  11   8    2.35    1.32
   0 -11   9   26.58    2.75
   0  11   9   26.03    2.81
   0 -11  10    0.76    1.62
   0  11  10   -2.13    1.60
   0 -11  11   17.23    2.56
   0  11  11   16.91    2.85
   0 -11  12    1.43    1.63
   0  11  12    1.08    1.44
   0 -11  13    2.39    2.23
   0  11  13   -0.42    1.36
   0 -11  14    6.14    2.26
   0  11  14    3.95    1.98
   0 -11  15    6.67    2.84
   0  11  15    5.51    2.23
   0 -11  16    1.00    2.02
   0  11  16    1.50    1.79
   0 -11  17   29.56    4.15
   0  11  17   29.98    4.36
   0 -11  18    1.91    2.14
   0  11  18    0.98    1.93
   0 -11  19    0.99    2.05
   0  11  19   -2.41    1.59
   0 -11  20    0.94    2.21
   0  11  20   -0.18    1.99
   0 -11  21    1.49    2.19
   0  11  21   -0.60    2.74
   0 -11  22   -2.16    1.91
   0  11  22    2.65    2.54
   0 -11  23    4.54    3.67
   0  11  23    0.06    2.30
   0 -11  24    1.54    3.35
   0  11  24    0.68    3.17
   0  12   0   89.48    3.58
   0  12  -1   44.68    2.62
   0  12   1   39.81    2.48
   0  12  -2   40.46    2.52
   0  12   2   34.36    2.42
   0  12  -3  126.62    4.50
   0  12   3  129.98    4.56
   0 -12   4   67.62    3.49
   0  12   4   67.74    3.50
   0 -12   5   10.30    1.69
   0  12   5   12.12    1.77
   0 -12   6  233.52    6.91
   0  12   6  235.04    7.17
   0 -12   7   42.62    3.20
   0  12   7   38.83    3.30
   0 -12   8  206.01    7.17
   0  12   8  202.48    7.16
   0 -12   9    8.87    1.83
   0  12   9    8.72    2.22
   0 -12  10   32.30    3.18
   0  12  10   33.48    3.37
   0 -12  11   25.88    3.03
   0  12  11   26.38    3.14
   0 -12  12   17.21    3.01
   0  12  12   14.97    2.58
   0 -12  13    1.30    1.65
   0  12  13    1.13    1.54
   0 -12  14   78.04    5.70
   0  12  14   64.47    5.19
   0 -12  15    5.98    2.38
   0  12  15    5.81    2.24
   0 -12  16   17.94    3.75
   0  12  16   18.12    3.27
   0 -12  17    0.00    1.83
   0  12  17    1.48    1.82
   0 -12  18   18.14    3.58
   0  12  18   16.77    3.38
   0 -12  19   -1.62    1.73
   0  12  19   -0.42    2.35
   0 -12  20    8.98    3.04
   0  12  20    6.98    2.86
   0 -12  21    2.14    2.33
   0  12  21    2.36    2.40
   0 -12  22    3.33    2.59
   0  12  22    2.93    3.03
   0 -12  23    0.56    2.59
   0  12  23    0.34    2.32
   0  13   0    1.36    1.05
   0  13  -1   72.48    3.39
   0  13   1   73.24    3.39
   0  13  -2  293.10    6.81
   0  13   2  301.51    7.03
   0  13  -3   16.36    1.80
   0  13   3   20.22    2.01
   0 -13   4   90.99    4.13
   0  13   4   97.76    4.38
   0 -13   5   43.42    3.06
   0  13   5   45.94    3.13
   0 -13   6   16.24    2.23
   0  13   6   17.41    2.38
   0 -13   7   21.28    2.40
   0  13   7   26.60    2.94
   0 -13   8   65.62    4.22
   0  13   8   65.64    4.44
   0 -13   9   14.87    2.47
   0  13   9   14.81    2.38
   0 -13  10   12.73    2.46
   0  13  10   12.52    2.59
   0 -13  11    7.71    2.00
   0  13  11    7.61    2.07
   0 -13  12    5.76    1.93
   0  13  12    4.91    1.94
   0 -13  13   -0.07    1.57
   0  13  13    1.10    2.08
   0 -13  14    3.02    2.49
   0  13  14    0.42    1.67
   0 -13  15    0.05    1.76
   0  13  15    1.73    2.40
   0 -13  16   15.06    3.46
   0  13  16   15.19    3.38
   0 -13  17    2.95    2.28
   0  13  17    1.28    2.38
   0 -13  18    4.98    2.53
   0  13  18    5.43    2.47
   0 -13  19   -0.90    1.84
   0  13  19   -1.00    1.77
   0 -13  20   -1.02    1.95
   0  13  20   -2.23    2.44
   0 -13  21   -0.73    2.12
   0  13  21   -0.05    2.10
   0 -13  22    0.55    2.40
   0  13  22    0.23    2.22
   0 -13  23   -0.02    2.39
   0  13  23    2.81    3.35
   0  14   0   88.96    3.80
   0  14  -1  163.68    5.19
   0  14   1  171.25    5.38
   0  14  -2  254.61    6.51
   0  14   2  258.02    6.71
   0  14  -3  176.88    5.65
   0  14   3  175.55    5.71
   0 -14   4   39.01    2.78
   0  14   4   41.62    3.11
   0 -14   5   90.37    4.31
   0  14   5   94.58    4.55
   0 -14   6   53.70    3.61
   0  14   6   57.18    3.77
   0 -14   7  133.46    5.73
   0  14   7  142.14    6.13
   0 -14   8  117.55    5.72
   0  14   8  118.44    5.86
   0 -14   9   70.93    4.56
   0  14   9   72.66    4.82
   0 -14  10   19.97    2.62
   0  14  10   19.34    2.76
   0 -14  11    1.01    1.73
   0  14  11   -0.61    1.70
   0 -14  12    1.39    2.02
   0  14  12    0.92    1.51
   0 -14  13   19.99    3.48
   0  14  13   14.85    3.03
   0 -14  14   -1.38    2.19
   0  14  14   -1.28    1.51
   0 -14  15   26.40    3.75
   0  14  15   22.10    3.81
   0 -14  16   -0.31    2.46
   0  14  16    1.32    2.40
   0 -14  17    3.81    2.35
   0  14  17    9.65    3.17
   0 -14  18   11.48    3.08
   0  14  18    6.69    2.92
   0 -14  19   -0.57    2.68
   0  14  19    0.16    1.98
   0 -14  20   -0.05    2.76
   0  14  20    1.31    2.15
   0 -14  21    1.48    2.99
   0  14  21    5.74    3.32
   0 -14  22   -0.15    3.09
   0  14  22    3.07    2.64
   0 -14  23    2.48    3.51
   0  14  23    2.30    2.67
   0  15   0    2.74    1.33
   0  15  -1   86.88    3.94
   0  15   1   84.06    3.98
   0  15  -2   13.01    1.87
   0  15   2    7.15    1.42
   0  15  -3   82.32    4.05
   0  15   3   76.69    4.02
   0  15  -4   -3.15    1.19
   0  15   4    0.19    1.00
   0 -15   5   50.71    3.51
   0  15   5   53.77    3.58
   0 -15   6   30.41    2.76
   0  15   6   32.47    2.98
   0 -15   7    8.91    1.82
   0  15   7    3.60    1.59
   0 -15   8    9.27    1.92
   0  15   8   11.56    2.19
   0 -15   9   16.55    2.67
   0  15   9   14.17    2.47
   0 -15  10   47.37    4.04
   0  15  10   53.15    4.40
   0 -15  11    4.20    1.65
   0  15  11    3.21    2.02
   0 -15  12   -2.36    1.72
   0  15  12   -0.27    1.81
   0 -15  13    6.98    2.59
   0  15  13    3.55    2.28
   0 -15  14   -1.78    2.17
   0  15  14    0.12    1.56
   0 -15  15    5.91    2.44
   0  15  15    6.13    2.81
   0 -15  16    5.45    3.25
   0  15  16    7.36    2.49
   0 -15  17    8.56    2.74
   0  15  17    6.88    2.53
   0 -15  18   -0.62    2.67
   0  15  18   -1.54    1.63
   0 -15  19   -1.90    2.67
   0  15  19   -0.40    2.57
   0 -15  20   -3.42    2.55
   0  15  20   -1.08    2.59
   0 -15  21    1.05    2.97
   0  15  21   -0.34    2.22
   0 -15  22   -1.12    2.00
   0  15  22    1.82    3.22
   0 -15  23    2.29    2.79
   0  15  23   -0.94    2.44
   0  16   0  369.11    8.36
   0  16  -1   29.85    2.46
   0  16   1   28.21    2.43
   0  16  -2   83.98    4.04
   0  16   2   79.93    3.96
   0  16  -3  491.23    9.93
   0  16   3  519.25   10.56
   0  16  -4   39.82    3.10
   0  16   4   47.92    3.48
   0 -16   5   14.92    2.02
   0 -16   6   93.61    4.73
   0  16   6   97.73    5.13
   0 -16   7  180.18    6.86
   0  16   7  199.41    7.54
   0 -16   8   38.50    3.56
   0  16   8   38.69    3.77
   0 -16   9   58.90    4.33
   0  16   9   60.71    4.73
   0 -16  10    4.15    1.95
   0  16  10    3.06    2.06
   0 -16  11    4.60    1.73
   0  16  11    3.48    1.82
   0 -16  12    2.81    2.10
   0  16  12   -0.45    1.86
   0 -16  13   20.08    3.46
   0  16  13   18.04    3.45
   0 -16  14    8.42    2.82
   0  16  14    5.46    2.31
   0 -16  15    0.03    1.87
   0  16  15   -0.10    1.58
   0 -16  16    5.09    2.99
   0  16  16    5.99    2.34
   0 -16  17    5.90    2.42
   0  16  17    7.54    2.57
   0 -16  18    4.02    3.15
   0  16  18    0.27    2.05
   0 -16  19   14.88    3.97
   0  16  19   10.06    3.08
   0 -16  20   -1.52    1.79
   0  16  20    1.48    2.23
   0 -16  21    2.69    2.51
   0  16  21    4.18    3.31
   0 -16  22    0.76    2.49
   0  16  22    3.07    2.71
   0 -16  23    1.21    2.48
   0  16  23    4.59    3.74
   0  17  -1   77.44    3.98
   0  17   1   71.57    3.91
   0  17  -2    6.70    1.65
   0  17   2    5.62    1.66
   0  17  -3   26.84    2.63
   0  17   3   23.80    2.42
   0  17  -4   34.63    2.96
   0  17   4   32.81    2.88
   0 -17   5   32.57    2.84
   0  17   5   35.34    3.22
   0 -17   6   -1.30    1.33
   0  17   6    0.96    1.59
   0 -17   7   -1.13    1.44
   0  17   7   -1.59    1.58
   0 -17   8    6.22    2.05
   0  17   8    5.32    1.78
   0 -17   9   50.50    4.08
   0  17   9   47.26    4.17
   0 -17  10   -0.20    1.22
   0  17  10   -0.36    1.20
   0 -17  11    6.67    2.05
   0  17  11   10.39    2.40
   0 -17  12    5.15    2.30
   0  17  12    7.33    2.73
   0 -17  13   -1.27    2.01
   0  17  13   -0.08    2.30
   0 -17  14   -1.37    2.26
   0  17  14    0.75    1.95
   0 -17  15    3.16    2.20
   0  17  15    3.29    2.13
   0 -17  16    3.52    2.20
   0  17  16    2.82    2.56
   0 -17  17    3.45    2.67
   0  17  17    1.64    2.53
   0 -17  18    0.36    2.71
   0  17  18   -1.25    2.57
   0 -17  19    0.80    2.19
   0  17  19   -0.53    2.75
   0 -17  20   -0.83    2.17
   0  17  20   -0.61    2.82
   0 -17  21    1.25    3.12
   0  17  21    2.28    2.51
   0 -17  22   -1.66    2.92
   0  17  22   -2.93    2.75
   0 -17  23   -2.83    3.36
   0  17  23   -0.87    2.59
   0  18   0   69.04    3.89
   0  18  -1   61.03    3.68
   0  18   1   57.18    3.53
   0  18  -2  130.26    5.20
   0  18   2  137.09    5.49
   0  18  -3    0.78    1.03
   0  18   3    0.71    1.37
   0  18  -4  190.19    6.50
   0  18   4  201.36    7.11
   0 -18   5    8.23    1.71
   0  18   5    9.63    2.15
   0 -18   6  103.50    5.22
   0  18   6  115.16    5.79
   0 -18   7   -0.87    0.94
   0  18   7    0.21    1.56
   0 -18   8  111.80    5.81
   0  18   8  115.66    6.24
   0 -18   9   -0.31    1.17
   0  18   9    0.76    1.91
   0 -18  10   13.55    2.49
   0  18  10   13.83    2.60
   0 -18  11   -0.32    1.35
   0  18  11    0.52    1.55
   0 -18  12   29.24    3.77
   0  18  12   30.60    4.11
   0 -18  13    1.81    2.34
   0  18  13   -1.23    2.40
   0 -18  14    5.45    2.72
   0  18  14    5.29    2.83
   0 -18  15   -3.97    2.34
   0  18  15   -1.17    1.74
   0 -18  16    1.87    2.05
   0  18  16   -0.51    2.60
   0 -18  17   -1.15    2.52
   0  18  17    1.61    2.19
   0 -18  18   21.82    3.93
   0  18  18   28.26    4.60
   0 -18  19    3.88    3.36
   0  18  19    5.85    2.80
   0 -18  20    2.65    3.34
   0  18  20    7.09    3.13
   0 -18  21   -0.83    3.26
   0  18  21   -0.53    3.13
   0 -18  22    7.19    3.16
   0  18  22    5.35    3.73
   0  19   0    1.61    1.27
   0  19  -1   15.42    2.11
   0  19   1   13.15    2.06
   0  19  -2    8.82    1.77
   0  19   2    5.81    1.77
   0  19  -3    2.80    1.54
   0  19   3    1.41    1.50
   0  19  -4   15.77    2.31
   0  19   4   14.14    2.43
   0 -19   5   50.71    3.76
   0  19   5   51.18    3.83
   0 -19   6   13.22    2.32
   0  19   6   11.50    2.49
   0 -19   7    5.71    1.98
   0  19   7    3.70    1.55
   0 -19   8   57.93    4.41
   0  19   8   58.48    4.67
   0 -19   9   -0.34    1.19
   0  19   9    1.01    1.50
   0 -19  10   65.67    4.88
   0  19  10   70.56    5.49
   0 -19  11    1.07    1.51
   0  19  11   -0.96    1.97
   0 -19  12   -0.56    1.94
   0  19  12    1.33    1.82
   0 -19  13    1.62    2.28
   0  19  13   -1.03    2.24
   0 -19  14    1.32    2.55
   0  19  14   -1.56    2.27
   0 -19  15   -0.39    2.48
   0  19  15    4.78    2.34
   0 -19  16    3.31    2.72
   0  19  16    6.42    2.66
   0 -19  17   -0.05    2.06
   0  19  17   -0.65    2.03
   0 -19  18    1.91    2.86
   0  19  18    3.26    3.24
   0 -19  19    1.50    3.31
   0  19  19    4.64    3.32
   0 -19  20    0.38    2.30
   0  19  20    1.47    3.15
   0 -19  21   -0.91    2.28
   0  19  21    2.89    2.81
   0 -19  22    2.19    3.36
   0  19  22   -0.64    2.44
   0  20   0    9.00    1.82
   0  20  -1    0.83    1.24
   0  20   1   -1.78    1.12
   0  20  -2   17.28    2.27
   0  20   2   15.64    2.36
   0  20  -3  174.01    6.40
   0  20   3  179.63    6.81
   0  20  -4    5.35    1.74
   0  20   4    3.92    1.50
   0 -20   5  106.89    5.35
   0  20   5  114.06    5.85
   0 -20   6   16.56    2.53
   0  20   6   19.09    2.87
   0 -20   7   24.72    3.03
   0  20   7   29.36    3.51
   0 -20   8   37.44    3.68
   0  20   8   40.14    3.95
   0 -20   9   27.78    3.26
   0  20   9   24.66    3.26
   0 -20  10   26.09    3.34
   0  20  10   28.15    3.77
   0 -20  11   23.61    3.23
   0  20  11   27.14    3.99
   0 -20  12   11.38    2.90
   0  20  12   10.80    2.82
   0 -20  13   19.60    3.19
   0  20  13   25.90    4.19
   0 -20  14   23.11    3.59
   0  20  14   23.10    4.12
   0 -20  15    0.03    1.84
   0  20  15    2.45    2.75
   0 -20  16    0.54    2.68
   0  20  16    6.46    2.70
   0 -20  17    9.24    2.93
   0  20  17    9.14    3.48
   0 -20  18   14.18    3.95
   0  20  18   10.70    3.18
   0 -20  19    9.07    3.21
   0  20  19    7.68    2.99
   0  20  20    4.83    2.69
   0 -20  21    3.62    3.56
   0  20  21    5.77    3.00
   0 -20  22    6.98    3.81
   0  20  22    3.37    3.54
   0  21   0   -0.06    1.25
   0  21  -1   12.86    2.07
   0  21   1   12.29    1.93
   0  21  -2    5.04    1.38
   0  21   2    3.43    1.65
   0  21  -3   18.62    2.45
   0  21   3    9.82    1.91
   0  21  -4   11.21    2.15
   0  21   4   10.08    1.99
   0 -21   5    0.12    1.06
   0  21   5    0.30    1.70
   0 -21   6   16.90    2.41
   0  21   6   16.19    2.53
   0 -21   7    3.36    1.80
   0  21   7    2.46    2.03
   0 -21   8    1.34    1.81
   0  21   8    1.91    1.66
   0 -21   9   86.51    5.44
   0  21   9   82.14    5.70
   0 -21  10    7.24    2.48
   0  21  10    6.92    2.67
   0 -21  11    1.36    2.07
   0  21  11    4.05    2.48
   0 -21  12    0.10    2.22
   0  21  12    2.42    1.96
   0 -21  13    1.11    1.72
   0  21  13   -0.64    2.49
   0 -21  14    3.78    2.16
   0  21  14    5.16    2.96
   0 -21  15    2.05    2.13
   0  21  15    1.63    2.68
   0 -21  16   -0.87    1.81
   0  21  16   -2.02    2.37
   0 -21  17    3.16    3.22
   0  21  17    5.12    2.64
   0 -21  18   -0.79    2.13
   0  21  18    1.82    2.36
   0 -21  19    0.17    3.13
   0  21  19   -0.20    2.78
   0 -21  20    3.02    2.53
   0  21  20    0.92    2.97
   0 -21  21    3.31    2.80
   0  21  21    2.87    3.30
   0 -21  22    1.82    3.54
   0  21  22    1.36    2.73
   0  22   0    8.25    1.88
   0  22  -1    1.71    1.38
   0  22   1    2.27    1.54
   0  22  -2    3.32    1.55
   0  22   2    0.66    1.56
   0  22  -3   65.65    4.21
   0  22   3   67.69    4.48
   0  22  -4   12.82    2.06
   0  22   4   10.53    2.09
   0 -22   5   22.27    2.83
   0  22   5   24.74    3.17
   0 -22   6    1.29    1.65
   0  22   6    2.71    1.60
   0 -22   7   94.03    5.34
   0  22   7  107.83    6.26
   0 -22   8    1.09    1.40
   0  22   8    1.02    2.13
   0 -22   9   52.97    4.57
   0  22   9   49.80    4.85
   0 -22  10   23.34    3.53
   0  22  10   27.78    3.68
   0 -22  11   14.11    3.03
   0  22  11   12.77    3.22
   0 -22  12   11.99    2.65
   0  22  12   13.16    2.98
   0 -22  13   34.49    4.43
   0  22  13   30.53    4.62
   0 -22  14   -1.70    2.25
   0  22  14   -0.56    1.94
   0 -22  15    7.98    3.20
   0  22  15    5.18    2.52
   0 -22  16   -0.70    2.70
   0  22  16    1.70    2.95
   0 -22  17    8.11    2.94
   0  22  17   12.70    3.48
   0 -22  18   10.01    3.73
   0  22  18   13.96    4.15
   0 -22  19    8.55    3.13
   0  22  19   11.77    4.03
   0 -22  20    4.28    3.59
   0  22  20    5.75    2.93
   0 -22  21    4.66    3.75
   0  22  21    7.66    3.29
   0  23   0   -0.63    1.32
   0  23  -1   14.16    2.29
   0  23   1   15.75    2.46
   0  23  -2    4.94    1.76
   0  23   2    1.86    1.32
   0  23  -3   12.51    2.31
   0  23   3   13.05    2.54
   0  23  -4   19.74    2.50
   0  23   4   18.85    2.62
   0 -23   5   14.13    2.42
   0  23   5   19.96    2.97
   0 -23   6    1.56    1.32
   0  23   6    2.02    1.57
   0 -23   7    4.47    1.97
   0  23   7    2.01    1.65
   0 -23   8    8.01    2.33
   0  23   8   11.16    2.93
   0 -23   9    4.65    2.22
   0  23   9    3.48    2.56
   0 -23  10   13.00    2.61
   0  23  10   19.50    3.31
   0 -23  11    3.77    2.32
   0  23  11    3.35    2.48
   0 -23  12   -0.84    1.97
   0  23  12    0.25    1.76
   0 -23  13    2.84    2.46
   0  23  13   -0.31    2.50
   0 -23  14   -0.07    1.70
   0  23  14    0.41    1.97
   0 -23  15    0.72    1.98
   0  23  15   -1.20    1.87
   0 -23  16    0.93    2.75
   0  23  16   -0.24    2.76
   0 -23  17   -1.20    2.82
   0  23  17    2.13    3.17
   0 -23  18    2.70    2.48
   0  23  18    1.94    2.47
   0 -23  19    6.38    3.56
   0  23  19    0.75    2.50
   0 -23  20    1.79    3.36
   0  23  20    0.72    3.09
   0 -23  21   -0.15    2.43
   0  23  21    2.44    3.35
   0  24   0    2.96    1.73
   0  24  -1   39.15    3.52
   0  24   1   43.14    3.74
   0  24  -2   72.89    4.45
   0  24   2   76.25    4.89
   0  24  -3    7.54    2.10
   0  24   3    7.73    2.26
   0  24  -4   28.14    3.13
   0  24   4   29.66    3.44
   0 -24   5    0.44    1.14
   0  24   5   -0.24    1.80
   0 -24   6   40.90    3.79
   0  24   6   36.35    4.03
   0 -24   7    2.54    1.43
   0  24   7    4.38    2.41
   0 -24   8  113.98    6.43
   0  24   8  117.93    7.13
   0 -24   9   -0.34    1.85
   0  24   9    2.30    2.33
   0 -24  10   22.13    3.46
   0  24  10   26.85    3.87
   0 -24  11    1.15    2.15
   0  24  11   -1.00    2.23
   0 -24  12   20.54    3.50
   0  24  12   20.43    3.59
   0 -24  13    2.86    1.88
   0  24  13    0.48    2.58
   0 -24  14   15.05    3.42
   0  24  14   18.91    3.73
   0 -24  15    0.27    2.55
   0  24  15   -1.92    1.77
   0 -24  16   11.22    2.98
   0  24  16   15.32    3.60
   0 -24  17    2.34    2.38
   0  24  17    2.66    3.21
   0 -24  18   14.02    4.20
   0  24  18   14.26    3.76
   0 -24  19    3.41    2.43
   0  24  19    9.55    3.90
   0 -24  20    4.43    3.63
   0  24  20    6.70    3.80
   0 -24  21    0.94    3.35
   0  24  21    2.04    3.52
   0  25   0    0.10    1.50
   0  25  -1    5.99    1.61
   0  25   1    5.38    1.63
   0  25  -2    9.61    2.15
   0  25   2    6.09    2.05
   0  25  -3   -1.29    1.43
   0  25   3   -1.29    1.13
   0  25  -4   22.92    2.95
   0  25   4   23.86    3.22
   0 -25   5   10.79    2.10
   0  25   5   11.55    2.65
   0 -25   6    5.98    2.09
   0  25   6    6.35    2.38
   0 -25   7    1.94    1.91
   0  25   7    3.87    2.42
   0 -25   8   11.75    2.75
   0  25   8   13.58    3.15
   0 -25   9   14.28    2.93
   0  25   9   15.66    3.44
   0 -25  10    5.67    2.02
   0  25  10    8.18    2.59
   0 -25  11    0.80    2.08
   0  25  11    0.93    2.52
   0 -25  12    1.42    2.28
   0  25  12   -0.70    1.89
   0 -25  13    3.64    2.64
   0  25  13    1.34    1.99
   0 -25  14    1.53    2.52
   0  25  14    2.02    2.16
   0 -25  15    0.65    2.62
   0  25  15    3.86    2.92
   0 -25  16    3.64    3.08
   0  25  16    3.51    2.54
   0 -25  17    3.76    3.21
   0  25  17    4.87    2.75
   0 -25  18    2.88    2.47
   0  25  18    6.67    3.53
   0 -25  19   -0.08    2.95
   0  25  19    1.67    2.61
   0 -25  20   -1.09    2.25
   0  25  20    0.91    2.64
   0  26   0   42.40    3.75
   0  26  -1   -1.16    1.50
   0  26   1    0.51    1.62
   0  26  -2   42.22    3.72
   0  26   2   50.98    4.27
   0  26  -3   17.33    2.50
   0  26   3   20.73    3.12
   0  26  -4   10.03    2.01
   0  26   4   13.20    2.81
   0  26   5   12.51    2.80
   0 -26   6   11.86    2.50
   0  26   6   10.61    2.46
   0 -26   7   75.19    5.12
   0  26   7   82.78    6.14
   0 -26   8    5.23    1.91
   0  26   8    5.32    2.74
   0 -26   9   24.10    3.49
   0  26   9   24.47    3.93
   0 -26  10   10.81    2.90
   0  26  10   10.41    2.85
   0 -26  11    2.05    2.18
   0  26  11    3.28    2.83
   0 -26  12    9.75    2.92
   0  26  12   12.66    3.65
   0 -26  13   12.82    3.25
   0 -26  14    5.70    2.95
   0  26  14    4.96    3.21
   0 -26  15   10.10    3.35
   0  26  15   12.38    3.80
   0 -26  16    3.51    3.09
   0  26  16   -0.15    2.79
   0 -26  17    9.14    3.12
   0  26  17   16.45    4.31
   0 -26  18    0.53    3.00
   0  26  18   -1.23    2.27
   0 -26  19    3.30    2.62
   0  26  19    5.70    3.51
   0  26  20   -0.18    3.32
   0  27   0    2.05    1.70
   0  27  -1    8.25    2.16
   0  27   1    5.95    2.09
   0  27  -2    4.64    1.86
   0  27   2    5.68    2.11
   0  27  -3    1.62    1.71
   0  27   3    1.85    1.81
   0  27  -4    2.87    1.84
   0  27   4    2.24    1.57
   0  27   5    1.54    1.94
   0 -27   6   -1.42    1.66
   0  27   6    0.87    1.68
   0 -27   7    7.28    1.98
   0  27   7    8.98    2.88
   0 -27   8   11.07    2.78
   0  27   8   15.47    3.45
   0 -27   9   24.08    3.28
   0  27   9   26.25    4.15
   0 -27  10   10.76    2.53
   0  27  10   11.08    2.92
   0 -27  11   13.51    3.10
   0  27  11   13.45    3.58
   0 -27  12    2.68    2.61
   0  27  12   -0.51    2.64
   0 -27  13    1.54    2.57
   0  27  13    2.75    2.45
   0 -27  14    7.03    2.56
   0  27  14    4.41    3.31
   0 -27  15    3.32    2.30
   0  27  15    3.90    3.11
   0 -27  16    1.52    2.94
   0  27  16    3.22    3.23
   0 -27  17    1.42    3.11
   0  27  18   -0.43    2.94
   0  27  19    1.03    3.35
   0  27  20   -0.81    2.45
   0  28   0    6.37    2.19
   0  28  -1   38.95    3.77
   0  28   1   40.06    3.87
   0  28  -2    7.99    1.96
   0  28   2    9.29    2.45
   0  28  -3   44.77    4.04
   0  28   3   47.11    4.40
   0  28  -4    5.96    2.18
   0  28   4    7.34    2.60
   0  28   5   45.38    4.45
   0 -28   6   30.69    3.51
   0  28   6   31.02    4.09
   0 -28   7   38.18    4.08
   0  28   7   47.87    4.81
   0 -28   8   45.39    4.49
   0  28   8   53.50    5.42
   0 -28   9    8.84    2.68
   0  28   9   12.17    3.44
   0 -28  10    0.31    2.22
   0  28  10   -0.14    1.93
   0 -28  11   32.92    4.33
   0  28  11   38.28    5.20
   0 -28  12   -0.07    1.69
   0  28  12    0.13    2.75
   0 -28  13   10.28    3.27
   0  28  13   15.88    4.09
   0 -28  14    1.64    2.59
   0  28  14    1.93    3.07
   0  28  15    0.19    2.27
   0  28  16    4.60    2.68
   0  28  17    3.34    2.86
   0  28  18    0.77    3.25
   0  28  19    2.77    2.71
   0  29   0   -0.75    1.58
   0  29  -1    2.80    1.80
   0  29   1    4.87    2.09
   0  29  -2    5.47    2.16
   0  29   2    3.55    2.11
   0  29  -3    3.81    2.03
   0  29   3    2.92    2.18
   0  29  -4    2.14    1.96
   0  29   4    3.92    2.30
   0 -29   5    4.51    1.78
   0  29   5    3.11    2.45
   0 -29   6   10.20    2.36
   0  29   6    7.32    2.84
   0 -29   7    1.02    2.10
   0  29   7   -0.53    1.77
   0 -29   8    4.52    2.36
   0  29   8    5.67    2.77
   0 -29   9    8.69    2.73
   0  29   9    9.08    3.35
   0 -29  10    5.09    2.66
   0  29  10    8.25    3.30
   0 -29  11    4.96    2.55
   0  29  11    3.01    3.07
   0 -29  12    1.81    2.26
   0  29  12    1.87    3.07
   0  29  13   12.35    3.99
   0  29  14    0.23    2.16
   0  29  15   -3.21    2.80
   0  29  16    3.61    3.39
   0  29  17    2.55    3.26
   0  29  18    2.68    2.75
   0  29  19   -4.98    2.94
   0  30   0   34.76    3.84
   0  30  -1    4.10    2.20
   0  30   1    4.08    1.76
   0  30  -2  111.50    6.23
   0  30   2  106.65    6.41
   0  30  -3    4.42    2.36
   0  30   3    7.99    2.63
   0  30  -4   80.14    5.51
   0  30   4   76.87    5.70
   0 -30   5   -0.37    1.81
   0  30   5   -0.60    2.31
   0 -30   6   78.23    5.60
   0  30   6   72.83    5.97
   0 -30   7    8.62    2.62
   0  30   7    9.25    3.05
   0 -30   8   15.41    2.93
   0  30   8   39.06    4.86
   0  30   9    1.14    2.68
   0  30  10   44.13    5.50
   0  30  11   16.01    4.07
   0  30  12   29.05    5.00
   0  30  13    0.21    2.90
   0  30  14    6.82    3.06
   0  30  15    0.76    3.25
   0  30  16   -1.02    3.25
   0  30  17   -3.01    3.31
   0  30  18    4.74    3.69
   0  31   0    0.57    1.94
   0  31   1    3.78    2.16
   0  31   2    9.11    2.27
   0  31   3    1.01    1.59
   0  31   4    1.29    2.37
   0  31   5    2.89    2.40
   0  31   6    5.65    2.86
   0  31   7   -0.51    2.33
   0  31   8    4.70    2.79
   0  31   9    0.26    2.48
   0  31  10    2.85    3.15
   0  31  11    4.17    3.27
   0  31  12    3.55    2.62
   0  31  13    1.30    3.01
   0  31  14    0.24    3.12
   0  31  15   -0.15    3.21
   0  31  16    0.25    2.33
   0  31  17    2.15    2.84
   0  31  18   -0.87    3.81
   0  32   5   32.38    4.41
   0  32   6    2.02    1.93
   0  32   7   12.46    3.32
   0  32   8    2.48    2.07
   0  32   9   16.56    3.51
   0  32  10   10.95    3.54
   0  32  11   19.13    4.06
   0  32  12   10.44    3.37
   0  32  13   12.69    3.60
   0  32  14    4.63    3.58
   0  32  15    0.82    2.39
   0  32  16    4.33    3.09
   0  32  17    5.25    3.28
  -1   0  24    0.84    3.20
  -1   0  23    0.69    2.06
  -1   0  22    0.14    2.06
  -1   0  21   -1.26    2.52
  -1   0  20   -0.94    2.65
  -1   0  19    7.73    2.59
  -1   0  18    0.44    1.66
  -1   0  17   13.06    2.88
  -1   0  16    2.72    2.08
  -1   0  15   68.43    5.27
  -1   0  14    2.85    1.85
  -1   0  13   55.89    4.35
  -1   0  12   -1.04    1.07
  -1   0  11   14.83    2.48
  -1   0  10   -1.69    0.83
  -1   0   9   66.50    3.73
  -1   0   8    0.64    0.92
  -1   0   7    1.31    0.95
  -1   0   6    0.18    0.81
  -1   0   5  395.40    6.84
  -1   0   4   -0.10    0.84
  -1   0   3   70.97    2.16
   1   0   2   -0.17    0.36
   1   0   3  107.68    3.10
   1   0   4   -0.35    0.69
   1   0   5 1422.96   15.53
   1   0   6   -0.65    0.72
   1   0   7   12.17    1.92
   1   0   8   -1.51    1.24
   1   0   9   17.95    2.51
   1   0  10    1.30    1.35
   1   0  11    4.27    1.57
   1   0  12   -1.57    1.59
   1   0  13   31.03    3.41
   1   0  14    0.39    1.41
   1   0  16    0.12    1.69
   1   0  17    0.35    1.72
   1   0  18   -2.99    2.12
   1   0  19    7.85    2.77
   1   0  20   -0.21    2.61
   1   0  21    3.63    2.60
   1   0  22    0.87    3.00
   1   0  23    4.83    2.88
   1   0  24    3.44    3.43
  -1  -1  25    3.75    3.63
  -1   1  25    1.33    3.34
  -1  -1  24   -1.36    2.85
  -1   1  24    4.28    3.32
  -1  -1  23   -0.68    2.02
  -1   1  23   -2.44    1.87
  -1  -1  22   -0.31    2.15
  -1   1  22    2.66    2.35
  -1  -1  21    3.94    3.15
  -1   1  21    5.99    2.66
  -1  -1  20    2.67    2.15
  -1   1  20    2.40    2.20
  -1  -1  19    1.61    1.99
  -1   1  19    3.02    2.60
  -1  -1  18   -0.58    1.67
  -1   1  18    1.57    2.31
  -1  -1  17   31.35    4.28
  -1   1  17   28.60    4.07
  -1  -1  16   85.83    6.38
  -1   1  16   87.22    6.29
  -1  -1  15  120.49    6.87
  -1   1  15  118.16    6.72
  -1  -1  14   29.48    3.49
  -1   1  14   32.88    3.61
  -1  -1  13   12.92    2.34
  -1   1  13   13.06    2.37
  -1  -1  12    3.16    1.59
  -1   1  12    1.62    1.75
  -1  -1  11   25.74    2.72
  -1   1  11   26.07    2.81
  -1  -1  10    8.10    1.66
  -1   1  10    4.86    1.78
  -1  -1   9   43.53    3.21
  -1   1   9   43.32    3.12
  -1  -1   8   76.60    3.75
  -1   1   8   80.68    3.95
  -1  -1   7  286.58    6.77
  -1   1   7  269.86    6.75
  -1  -1   6  256.95    5.91
  -1   1   6  251.01    6.04
  -1  -1   5 1243.65   13.25
  -1   1   5 1188.88   13.12
  -1  -1   4  102.38    2.99
  -1   1   4   97.43    3.00
  -1  -1   3   54.70    1.87
  -1   1   3   57.62    2.09
  -1   1   2  160.40    3.00
   1  -1   2    3.67    0.64
   1   1   2    3.55    0.58
   1  -1   3   80.07    2.80
   1   1   3   71.18    2.50
   1  -1   4   35.45    2.14
   1   1   4   38.34    2.11
   1  -1   5    2.80    1.09
   1   1   5    2.22    0.99
   1  -1   6   20.44    1.99
   1   1   6   22.21    2.00
   1  -1   7   42.47    2.90
   1   1   7   44.84    2.97
   1  -1   8   25.97    2.68
   1   1   8   24.81    2.64
   1  -1   9   23.27    2.53
   1   1   9   24.96    2.58
   1  -1  10  132.33    5.96
   1   1  10  122.39    5.60
   1  -1  11   45.84    3.77
   1   1  11   44.46    3.64
   1  -1  12    5.03    2.17
   1   1  12    6.67    2.28
   1  -1  13    0.85    1.39
   1   1  13    1.39    1.44
   1  -1  14    0.50    1.48
   1   1  14   -0.51    1.80
   1  -1  15   25.11    3.87
   1  -1  16   16.01    3.03
   1   1  16   12.31    2.82
   1  -1  17    0.82    1.73
   1   1  17    0.29    2.42
   1  -1  18   -1.30    1.59
   1   1  18   -1.59    1.54
   1  -1  19    5.50    2.60
   1   1  19    5.96    3.05
   1  -1  20   -0.06    2.71
   1   1  20    2.22    2.31
   1  -1  21    8.52    2.95
   1   1  21    9.89    3.09
   1  -1  22    1.14    2.98
   1   1  22    3.98    3.24
   1  -1  23    3.46    2.69
   1   1  23    7.11    3.19
   1  -1  24    4.66    3.47
   1   1  24    4.32    3.61
  -1  -2  25    0.35    3.09
  -1   2  25    2.17    3.72
  -1  -2  24    7.66    3.72
  -1   2  24    7.48    3.82
  -1  -2  23    0.12    2.22
  -1   2  23   -1.87    2.00
  -1  -2  22   -3.09    2.53
  -1   2  22    0.56    2.19
  -1  -2  21   -0.39    1.94
  -1   2  21   -0.70    1.92
  -1  -2  20    2.20    2.23
  -1   2  20    2.23    2.19
  -1  -2  19    2.63    2.16
  -1   2  19    2.71    2.07
  -1  -2  18    4.96    2.73
  -1   2  18    8.67    2.57
  -1  -2  17    3.96    2.19
  -1   2  17    5.60    2.25
  -1  -2  16   29.44    3.91
  -1   2  16   27.93    3.71
  -1  -2  15    7.27    2.39
  -1   2  15    6.60    2.68
  -1  -2  14  124.97    6.67
  -1   2  14  116.91    6.36
  -1  -2  13    1.79    1.48
  -1   2  13    1.00    1.37
  -1  -2  12   -1.44    1.11
  -1   2  12   -2.77    1.41
  -1  -2  11    0.98    1.15
  -1   2  11    0.34    1.17
  -1  -2  10   13.60    2.00
  -1   2  10   14.82    2.11
  -1  -2   9    3.50    1.51
  -1   2   9    2.49    1.16
  -1  -2   8   66.71    3.57
  -1   2   8   63.39    3.60
  -1  -2   7   68.69    3.40
  -1   2   7   74.28    3.51
  -1  -2   6   16.33    1.79
  -1   2   6   17.04    1.75
  -1  -2   5  700.60    9.33
  -1   2   5  684.17    9.57
  -1  -2   4    4.40    0.84
  -1   2   4    2.92    0.90
  -1  -2   3   31.49    1.40
  -1   2   3   28.55    1.56
  -1   2   2   13.49    0.95
  -1   2  -1   85.54    2.35
   1  -2   2   36.82    1.81
   1   2   2   35.79    1.52
   1  -2   3  122.17    3.55
   1   2   3  127.36    3.32
   1  -2   4   79.73    3.10
   1   2   4   78.08    3.01
   1  -2   5  590.52    9.42
   1   2   5  681.93   10.02
   1  -2   6    2.04    1.38
   1   2   6    3.06    1.07
   1  -2   7   -0.54    0.87
   1   2   7   -0.97    1.08
   1  -2   8    1.71    1.26
   1   2   8    1.27    1.02
   1  -2   9    1.36    1.15
   1   2   9    2.41    1.28
   1  -2  10   32.72    3.29
   1   2  10   26.96    2.83
   1  -2  11    3.79    2.03
   1   2  11    2.98    1.86
   1  -2  12   33.04    3.67
   1   2  12   26.61    3.04
   1  -2  13    4.46    2.21
   1   2  13    3.33    1.69
   1  -2  14   -0.57    1.40
   1   2  14    0.43    1.51
   1  -2  15    1.89    1.90
   1   2  15    2.35    2.32
   1  -2  16    0.89    1.75
   1   2  16    2.36    2.12
   1  -2  17   -0.76    2.21
   1   2  17   -0.67    1.79
   1  -2  18    1.59    2.03
   1   2  18    1.91    2.56
   1  -2  19    1.49    2.76
   1   2  19    0.51    1.95
   1  -2  20   -1.54    1.93
   1   2  20    0.01    1.80
   1  -2  21   -0.15    2.02
   1   2  21    0.66    2.73
   1  -2  22    2.63    2.44
   1   2  22    0.86    2.33
   1  -2  23    0.13    2.19
   1   2  23    0.16    2.38
   1  -2  24    1.17    3.20
   1   2  24   -1.48    3.06
  -1  -3  25   -1.88    2.16
  -1   3  25    4.25    3.52
  -1  -3  24    0.80    3.18
  -1   3  24    1.13    3.06
  -1  -3  23   -0.46    2.08
  -1   3  23   -1.19    2.76
  -1  -3  22   -0.05    2.69
  -1   3  22    1.61    2.27
  -1  -3  21    1.48    2.24
  -1   3  21   -0.19    1.98
  -1  -3  20   15.28    3.45
  -1   3  20   14.72    3.36
  -1  -3  19   -1.51    2.28
  -1   3  19    0.10    1.75
  -1  -3  18   13.72    3.02
  -1   3  18   11.11    3.20
  -1  -3  17    3.11    2.02
  -1   3  17    2.11    2.54
  -1  -3  16  164.17    8.36
  -1   3  16  152.86    7.97
  -1  -3  15   49.01    4.50
  -1   3  15   45.93    4.39
  -1  -3  14   26.77    3.27
  -1   3  14   31.94    3.77
  -1  -3  13    2.86    2.02
  -1   3  13    4.73    1.71
  -1  -3  12    4.13    1.65
  -1   3  12    5.13    1.63
  -1  -3  11    2.93    1.39
  -1   3  11    1.16    1.71
  -1  -3  10   72.75    4.13
  -1   3  10   82.63    4.57
  -1  -3   9    0.88    0.96
  -1   3   9    0.81    1.03
  -1  -3   8   47.50    3.13
  -1   3   8   40.85    2.94
  -1  -3   7   38.83    2.57
  -1   3   7   36.07    2.54
  -1  -3   6  793.95   11.01
  -1   3   6  777.15   11.24
  -1  -3   5    0.30    0.98
  -1   3   5    0.73    0.83
  -1  -3   4 1202.13   11.99
  -1   3   4 1181.95   12.53
  -1  -3   3   67.37    2.08
  -1   3   3   70.12    2.45
  -1   3   2  306.32    4.86
  -1   3   1  284.65    4.49
  -1   3   0  594.40    7.17
  -1   3  -1   96.69    2.69
   1  -3   2    3.96    0.75
   1   3   2    5.18    0.74
   1  -3   3  168.35    4.33
   1   3   3  188.64    4.06
   1  -3   4    1.80    1.04
   1   3   4    2.51    1.02
   1  -3   5    0.85    1.20
   1   3   5    0.44    0.79
   1  -3   6  221.18    6.12
   1   3   6  228.43    5.95
   1  -3   7    4.76    1.33
   1   3   7    4.93    1.24
   1  -3   8   99.50    4.71
   1   3   8  100.93    4.56
   1  -3   9  108.94    5.18
   1   3   9  111.82    5.09
   1  -3  10  283.20    8.69
   1   3  10  276.81    8.34
   1  -3  11    1.32    1.86
   1   3  11    0.70    1.30
   1  -3  12   59.25    4.56
   1   3  12   66.95    4.62
   1  -3  13   56.14    4.56
   1   3  13   56.91    4.48
   1  -3  14   16.29    3.26
   1   3  14   17.00    2.92
   1   3  15    1.69    1.78
   1  -3  16   37.99    4.36
   1   3  16   36.86    4.62
   1  -3  17    1.17    1.80
   1   3  17   -2.94    2.14
   1  -3  18    2.65    2.07
   1   3  18    1.62    1.96
   1  -3  19    1.22    2.65
   1   3  19   -0.60    1.76
   1  -3  20   18.73    3.90
   1   3  20   17.56    4.05
   1  -3  21    0.00    2.90
   1   3  21   -0.81    2.85
   1  -3  22    9.99    3.20
   1   3  22   10.62    3.36
   1  -3  23    3.20    2.76
   1   3  23   -0.05    2.35
   1  -3  24    4.70    3.87
   1   3  24    5.04    3.70
  -1  -4  25    3.39    2.71
  -1   4  25    2.39    3.30
  -1  -4  24    3.64    3.41
  -1   4  24    1.73    3.17
  -1  -4  23    1.38    2.36
  -1   4  23   -1.21    2.96
  -1  -4  22   -4.39    2.19
  -1   4  22   -1.16    2.83
  -1  -4  21   -1.46    1.93
  -1   4  21    0.91    2.82
  -1  -4  20    5.64    3.12
  -1   4  20   13.63    3.72
  -1  -4  19    2.02    2.13
  -1   4  19    5.63    2.51
  -1  -4  18   -2.05    1.52
  -1   4  18    1.62    1.93
  -1  -4  17    3.66    2.69
  -1   4  17    2.76    2.05
  -1  -4  16    4.00    2.15
  -1   4  16    9.32    3.03
  -1  -4  15  114.72    6.79
  -1   4  15  107.51    6.51
  -1  -4  14    8.60    2.23
  -1   4  14    7.29    2.46
  -1  -4  13   24.10    3.24
  -1   4  13   20.03    2.78
  -1  -4  12   -0.20    1.15
  -1   4  12    0.19    1.24
  -1  -4  11    2.08    1.62
  -1   4  11    2.76    1.44
  -1  -4  10    1.77    1.22
  -1   4  10   -0.89    0.97
  -1  -4   9  121.29    5.09
  -1   4   9  115.74    5.06
  -1  -4   8    0.80    1.22
  -1   4   8    0.63    0.91
  -1  -4   7    3.49    1.20
  -1   4   7    4.14    1.13
  -1  -4   6    7.42    1.22
  -1   4   6   10.18    1.48
  -1  -4   5   44.83    2.35
  -1   4   5   45.51    2.61
  -1  -4   4   48.33    2.19
  -1   4   4   47.23    2.47
  -1  -4   3   -0.06    0.51
  -1   4   3    0.38    0.81
  -1   4   2   50.20    2.01
  -1   4   1    0.79    0.48
  -1   4   0   72.05    2.35
  -1   4  -1   11.91    1.08
   1  -4   2   13.09    1.35
   1   4   2   12.44    1.03
   1  -4   3  285.50    5.89
   1   4   3  298.96    5.30
   1  -4   4   39.66    2.38
   1   4   4   40.14    2.21
   1  -4   5  122.49    4.46
   1   4   5  123.22    4.11
   1  -4   6   56.54    3.28
   1   4   6   61.24    3.20
   1  -4   7    0.68    1.06
   1   4   7    1.75    1.29
   1  -4   8   -0.68    0.96
   1   4   8   -0.15    0.94
   1  -4   9   25.83    2.74
   1   4   9   21.66    2.57
   1  -4  10    2.49    1.55
   1   4  10    1.81    1.69
   1  -4  11   33.45    3.63
   1   4  11   36.25    3.43
   1  -4  12    5.58    2.05
   1   4  12    2.77    1.69
   1  -4  13   35.56    3.81
   1   4  13   39.65    3.85
   1  -4  14   36.77    3.99
   1   4  14   31.34    3.69
   1  -4  15    2.73    1.88
   1   4  15    2.98    1.87
   1  -4  16    1.13    1.78
   1   4  16    0.03    1.74
   1  -4  17    1.62    2.39
   1   4  17   -2.19    1.38
   1  -4  18    0.93    2.47
   1   4  18   -2.09    2.13
   1  -4  19    1.09    2.05
   1   4  19   -0.27    2.49
   1  -4  20    6.98    2.83
   1   4  20    3.34    2.42
   1  -4  21    5.82    3.50
   1   4  21    4.39    2.62
   1  -4  22    3.12    2.58
   1   4  22    0.96    2.49
   1  -4  23    3.72    2.72
   1   4  23   -0.15    3.16
   1  -4  24    1.62    3.37
   1   4  24   -3.78    2.91
  -1  -5  25    2.45    2.79
  -1   5  25    2.20    3.35
  -1  -5  24   -0.69    2.93
  -1   5  24   -1.50    2.91
  -1  -5  23    0.54    2.08
  -1   5  23   -4.13    2.54
  -1  -5  22    0.91    2.97
  -1   5  22   -1.22    2.56
  -1  -5  21   10.93    3.18
  -1   5  21    6.53    2.68
  -1  -5  20    1.35    2.95
  -1   5  20    2.85    2.34
  -1  -5  19   12.08    3.11
  -1   5  19   14.38    3.26
  -1  -5  18    4.42    2.72
  -1   5  18   10.29    3.20
  -1  -5  17   56.20    5.17
  -1   5  17   57.66    5.35
  -1  -5  16    3.70    2.60
  -1   5  16    5.29    2.27
  -1  -5  15   43.68    4.30
  -1   5  15   48.78    4.75
  -1  -5  14    9.07    2.60
  -1   5  14    6.13    2.04
  -1  -5  13    0.56    1.41
  -1   5  13    1.87    1.47
  -1  -5  12   26.51    2.97
  -1   5  12   29.94    3.17
  -1  -5  11   30.79    3.19
  -1   5  11   25.95    2.87
  -1  -5  10   16.79    2.45
  -1   5  10   13.21    2.09
  -1  -5   9   45.42    3.29
  -1   5   9   50.19    3.55
  -1  -5   8   13.70    1.91
  -1   5   8   12.35    1.80
  -1  -5   7   13.98    1.64
  -1   5   7   12.96    1.69
  -1  -5   6   69.01    3.10
  -1   5   6   61.53    3.13
  -1  -5   5  271.89    5.72
  -1   5   5  263.87    6.10
  -1  -5   4  238.59    4.72
  -1   5   4  250.13    5.58
  -1  -5   3    8.72    0.95
  -1   5   3   10.58    1.23
  -1   5   2   49.04    2.14
  -1   5   1  338.18    5.57
  -1   5   0   -0.21    0.49
  -1   5  -1   68.52    2.61
  -1   5  -2  469.28    7.36
   1   5   2  516.74    6.66
   1  -5   3   18.11    1.59
   1   5   3   18.26    1.48
   1  -5   4  155.08    4.68
   1   5   4  154.56    4.23
   1  -5   5   82.94    3.72
   1   5   5   78.76    3.41
   1  -5   6   53.30    3.24
   1   5   6   54.01    3.09
   1  -5   7  137.57    5.22
   1   5   7  144.16    5.20
   1  -5   8    2.77    1.57
   1   5   8    1.00    1.11
   1  -5   9  106.25    5.28
   1   5   9   87.97    4.67
   1  -5  10   43.54    3.67
   1   5  10   45.15    3.60
   1  -5  11  233.75    8.56
   1   5  11  228.37    8.27
   1  -5  12  147.55    6.99
   1   5  12  137.74    6.61
   1  -5  13   12.13    2.53
   1   5  13    9.03    2.23
   1  -5  14   72.36    5.65
   1   5  14   55.87    4.69
   1  -5  15   22.01    3.76
   1   5  15   21.94    3.32
   1  -5  16   12.24    3.20
   1   5  16    9.87    2.58
   1  -5  17    7.28    2.97
   1   5  17    2.38    1.93
   1  -5  18   20.38    3.66
   1   5  18   19.95    3.53
   1  -5  19   10.07    3.10
   1   5  19   11.87    3.10
   1  -5  20    8.52    2.99
   1   5  20    9.11    3.00
   1  -5  21   13.88    3.98
   1   5  21   11.70    3.36
   1  -5  22   -1.17    2.06
   1   5  22   -3.16    2.71
   1  -5  23    8.01    3.26
   1   5  23    7.06    3.75
   1  -5  24    0.27    3.31
   1   5  24    0.15    2.62
  -1  -6  25    2.07    2.69
  -1   6  25    0.37    2.37
  -1  -6  24   -0.08    3.02
  -1   6  24   -1.88    2.09
  -1  -6  23   -2.19    1.83
  -1   6  23   -1.53    2.11
  -1  -6  22   -2.48    2.49
  -1   6  22    1.68    2.15
  -1  -6  21    1.03    2.12
  -1   6  21   -0.13    1.94
  -1  -6  20    0.64    2.86
  -1   6  20    1.61    2.08
  -1  -6  19    3.97    2.38
  -1   6  19    9.09    3.30
  -1  -6  18    1.09    2.40
  -1   6  18    0.85    1.89
  -1  -6  17   13.22    2.86
  -1   6  17   13.12    3.00
  -1  -6  16    0.54    1.74
  -1   6  16    3.91    2.09
  -1  -6  15    7.55    2.64
  -1   6  15    7.43    2.70
  -1  -6  14  100.08    5.96
  -1   6  14  111.98    6.47
  -1  -6  13   11.02    2.22
  -1   6  13   13.59    2.51
  -1  -6  12   16.73    2.50
  -1   6  12   20.18    2.76
  -1  -6  11    4.90    1.95
  -1   6  11    1.83    1.78
  -1  -6  10    1.42    1.19
  -1   6  10    1.52    1.30
  -1  -6   9   13.59    1.88
  -1   6   9   12.80    2.00
  -1  -6   8   21.43    2.31
  -1   6   8   25.43    2.43
  -1  -6   7   -0.06    1.04
  -1   6   7    0.81    0.88
  -1  -6   6    1.18    0.79
  -1   6   6    0.35    0.80
  -1  -6   5    7.33    1.24
  -1   6   5    9.76    1.38
  -1  -6   4   17.10    1.44
  -1   6   4   17.33    1.75
  -1  -6   3    5.97    0.89
  -1   6   3    6.12    1.23
  -1  -6   2    4.33    0.76
  -1   6   2    2.92    1.01
  -1   6   1  170.20    4.08
  -1   6   0   84.74    2.92
  -1   6  -1  336.01    6.13
   1   6   1  345.30    4.91
  -1   6  -2  171.80    4.49
   1   6   2  173.41    3.71
   1  -6   3   15.11    1.58
   1   6   3   15.78    1.45
   1  -6   4    5.57    1.36
   1   6   4    6.84    1.10
   1   6   5    7.70    1.24
   1  -6   6   47.25    3.19
   1   6   6   46.48    2.93
   1  -6   7   14.97    1.95
   1   6   7   12.97    1.78
   1  -6   8   27.47    2.63
   1   6   8   25.48    2.60
   1  -6   9   12.99    2.12
   1   6   9   16.14    2.41
   1  -6  10   39.98    3.57
   1   6  10   37.88    3.52
   1  -6  11  101.89    5.74
   1   6  11  104.61    5.56
   1  -6  12   69.74    5.01
   1   6  12   66.16    4.86
   1  -6  13    3.82    2.37
   1   6  13    0.80    1.54
   1  -6  14    1.94    1.91
   1   6  14    1.01    1.51
   1  -6  15    6.00    2.42
   1   6  15    8.68    2.78
   1  -6  16   -0.93    1.66
   1   6  16   -2.20    2.07
   1  -6  17    0.60    1.94
   1   6  17   -0.90    2.21
   1  -6  18    3.58    2.40
   1   6  18    5.75    2.98
   1  -6  19    4.50    2.46
   1   6  19    6.53    3.11
   1  -6  20    0.19    2.11
   1   6  20    5.74    3.26
   1  -6  21    4.14    3.38
   1   6  21    5.46    3.38
   1  -6  22    0.12    2.36
   1   6  22   -0.92    3.09
   1  -6  23    1.44    2.65
   1   6  23    0.47    2.41
   1  -6  24    5.55    3.90
   1   6  24   -0.10    2.36
  -1  -7  24   -1.27    2.84
  -1   7  24   -0.52    2.28
  -1  -7  23    0.89    2.27
  -1   7  23    2.88    2.59
  -1  -7  22    2.15    2.97
  -1   7  22   -2.53    1.89
  -1  -7  21    1.77    2.28
  -1   7  21    0.71    2.71
  -1  -7  20    7.02    3.30
  -1   7  20   11.78    3.61
  -1  -7  19   15.69    3.34
  -1   7  19   16.49    3.47
  -1  -7  18    7.72    2.50
  -1   7  18    5.39    2.26
  -1  -7  17   23.63    3.93
  -1   7  17   28.51    3.97
  -1  -7  16   30.29    3.86
  -1   7  16   30.71    4.24
  -1  -7  15    0.36    1.55
  -1   7  15    0.68    1.69
  -1  -7  14    6.35    2.02
  -1   7  14    5.12    2.06
  -1  -7  13   10.41    2.59
  -1   7  13   10.70    2.36
  -1  -7  12   -0.64    1.64
  -1   7  12   -0.14    1.68
  -1  -7  11   52.04    3.99
  -1   7  11   48.09    3.85
  -1  -7  10   86.84    4.58
  -1   7  10   78.95    4.62
  -1  -7   9   74.39    4.18
  -1   7   9   77.71    4.32
  -1  -7   8    1.38    1.29
  -1   7   8    2.37    1.18
  -1  -7   7   84.45    3.86
  -1   7   7   79.68    3.93
  -1  -7   6    4.06    1.15
  -1   7   6    4.05    1.11
  -1  -7   5  111.04    3.69
  -1   7   5  118.50    4.39
  -1  -7   4   92.85    3.15
  -1   7   4   86.07    3.47
  -1  -7   3  123.19    3.26
  -1   7   3  120.44    3.90
  -1   7   2  241.80    5.29
   1   7  -2  243.86    4.17
  -1   7   1 1040.12   11.81
  -1   7   0    6.32    1.09
   1   7   0    1.98    0.59
  -1   7  -1   25.98    1.98
   1   7   1   26.42    1.45
  -1   7  -2   -0.73    0.69
   1   7   2    0.25    0.67
   1  -7   3  259.29    6.10
   1   7   3  262.13    5.29
   1  -7   4  320.80    7.14
   1   7   4  331.01    6.60
   1  -7   5  125.26    4.75
   1   7   5  126.63    4.31
   1  -7   6   28.75    2.65
   1   7   6   27.99    2.40
   1  -7   7   94.99    4.68
   1   7   7   94.23    4.31
   1  -7   8   57.47    3.73
   1   7   8   53.08    3.50
   1  -7   9  202.54    7.31
   1   7   9  199.54    6.84
   1  -7  10   53.97    4.10
   1   7  10   48.58    3.71
   1  -7  11  329.36   10.28
   1   7  11  302.04    9.40
   1  -7  12   64.90    5.13
   1   7  12   60.83    4.49
   1  -7  13  151.75    7.48
   1   7  13  135.26    6.82
   1  -7  14   10.18    2.87
   1   7  14    6.48    2.10
   1  -7  15   50.97    4.98
   1   7  15   51.66    4.96
   1  -7  16    2.02    2.04
   1   7  16    1.58    1.83
   1  -7  17   22.55    3.69
   1   7  17   29.76    4.10
   1  -7  18    1.22    2.12
   1   7  18    4.74    2.35
   1  -7  19   23.52    4.10
   1   7  19   19.05    3.71
   1  -7  20   25.04    4.70
   1   7  20   21.64    4.08
   1  -7  21   15.62    4.28
   1   7  21    8.21    3.10
   1  -7  22    5.83    3.54
   1   7  22    1.03    2.50
   1  -7  23    2.81    2.78
   1   7  23    3.83    2.65
   1  -7  24    0.33    2.42
   1   7  24    2.46    2.81
  -1  -8  24    0.86    2.40
  -1   8  24   -0.23    2.48
  -1  -8  23    1.58    2.24
  -1   8  23    1.13    2.49
  -1  -8  22    0.17    2.76
  -1   8  22   -0.27    2.80
  -1  -8  21    2.41    2.50
  -1   8  21    2.18    2.93
  -1  -8  20    2.95    2.97
  -1   8  20    4.40    2.53
  -1  -8  19    1.74    2.10
  -1   8  19    2.70    2.76
  -1  -8  18    4.67    2.25
  -1   8  18    0.50    1.88
  -1  -8  17    3.62    2.70
  -1   8  17    5.20    2.76
  -1  -8  16    1.14    2.36
  -1   8  16    1.24    1.87
  -1  -8  15   18.45    3.34
  -1   8  15   17.83    3.08
  -1  -8  14   26.69    3.35
  -1   8  14   26.54    3.44
  -1  -8  13   33.50    3.51
  -1   8  13   30.31    3.48
  -1  -8  12   24.09    3.08
  -1   8  12   23.26    3.19
  -1  -8  11    0.60    1.56
  -1   8  11    0.14    1.20
  -1  -8  10    0.21    1.14
  -1   8  10    0.91    1.24
  -1  -8   9   55.10    3.57
  -1   8   9   50.33    3.58
  -1  -8   8    8.35    1.57
  -1   8   8    7.78    1.60
  -1  -8   7   -0.23    1.06
  -1   8   7    0.62    1.23
  -1  -8   6   11.59    1.42
  -1   8   6   12.48    1.68
  -1  -8   5    0.37    0.68
  -1   8   5    0.09    0.76
  -1  -8   4  104.60    3.41
  -1   8   4  105.55    3.97
  -1  -8   3   46.85    2.08
  -1   8   3   44.52    2.51
  -1   8   2  206.66    5.14
   1   8  -2  211.11    4.11
  -1   8   1   50.06    2.50
   1   8  -1   52.06    1.96
  -1   8   0 1029.27   12.37
   1   8   0  991.36   10.09
  -1   8  -1   16.83    1.60
   1   8   1   16.64    1.26
  -1   8  -2   20.64    1.92
   1   8   2   21.10    1.45
   1  -8   3   13.76    1.60
   1   8   3   12.62    1.38
   1  -8   4    6.02    1.48
   1   8   4    6.22    1.31
   1  -8   5   22.76    2.17
   1   8   5   25.66    2.21
   1  -8   6    4.89    1.35
   1   8   6    3.08    1.44
   1  -8   7   40.37    3.13
   1   8   7   39.14    2.88
   1  -8   8    0.22    1.08
   1   8   8    0.15    1.06
   1  -8   9    6.89    2.07
   1   8   9    6.64    1.67
   1  -8  10   79.76    4.94
   1   8  10   76.39    4.61
   1  -8  11   55.68    4.52
   1   8  11   48.16    3.90
   1  -8  12   50.70    4.42
   1   8  12   45.06    3.98
   1  -8  13    7.98    2.71
   1   8  13    5.34    1.92
   1  -8  14   23.02    3.46
   1   8  14   18.37    3.03
   1  -8  15   10.81    3.17
   1   8  15    4.88    2.17
   1  -8  16    1.23    2.60
   1   8  16    0.84    1.85
   1  -8  17   -0.27    1.97
   1   8  17    0.61    2.32
   1  -8  18    1.56    2.14
   1   8  18    1.11    2.52
   1  -8  19    2.18    2.45
   1   8  19    6.21    3.14
   1  -8  20    5.55    3.47
   1   8  20    4.64    2.66
   1  -8  21    2.50    3.12
   1   8  21    2.30    2.50
   1  -8  22    0.89    3.13
   1   8  22    3.84    2.62
   1  -8  23    1.99    2.74
   1   8  23    0.62    2.26
   1  -8  24   -2.38    2.18
   1   8  24   -1.67    3.00
  -1  -9  24    2.92    2.82
  -1   9  24    6.69    3.11
  -1  -9  23    0.91    2.99
  -1   9  23   13.54    4.25
  -1  -9  22    4.29    2.57
  -1   9  22    8.81    3.65
  -1  -9  21   -1.63    1.96
  -1   9  21    0.89    2.12
  -1  -9  20   27.72    4.63
  -1   9  20   22.52    4.30
  -1  -9  19    1.07    2.60
  -1   9  19    0.45    1.95
  -1  -9  18   19.73    3.46
  -1   9  18   20.50    3.97
  -1  -9  17    6.06    2.39
  -1   9  17    6.96    2.47
  -1  -9  16   21.83    3.41
  -1   9  16   20.54    3.36
  -1  -9  15    0.94    2.27
  -1   9  15    0.18    1.60
  -1  -9  14   16.54    3.14
  -1   9  14   14.44    2.75
  -1  -9  13   45.53    4.10
  -1   9  13   40.65    3.94
  -1  -9  12   25.11    2.93
  -1   9  12   21.31    2.87
  -1  -9  11    0.57    1.55
  -1   9  11   -0.09    1.64
  -1  -9  10   59.94    3.95
  -1   9  10   62.01    4.22
  -1  -9   9   24.12    2.50
  -1   9   9   23.33    2.60
  -1  -9   8   76.96    4.06
  -1   9   8   75.23    4.34
  -1  -9   7    6.32    1.44
  -1   9   7    3.62    1.51
  -1  -9   6   51.91    2.94
  -1   9   6   56.82    3.50
  -1  -9   5    1.55    0.98
  -1   9   5    0.02    1.11
  -1  -9   4  298.68    6.01
  -1   9   4  283.61    6.75
  -1  -9   3    4.55    0.92
  -1   9   3    4.00    1.07
  -1   9   2  235.89    5.68
   1   9  -2  235.90    4.61
  -1   9   1    7.79    1.23
   1   9  -1    7.04    1.00
   1   9   0    0.88    0.66
  -1   9  -1  252.87    5.95
   1   9   1  248.59    4.79
  -1   9  -2  135.76    4.48
   1   9   2  144.44    3.89
  -1   9  -3   32.80    2.46
   1   9   3   36.47    2.17
   1  -9   4  301.01    7.36
   1   9   4  308.18    6.63
   1  -9   5   50.18    3.27
   1   9   5   49.60    2.92
   1  -9   6  313.71    8.19
   1   9   6  332.88    7.94
   1  -9   7   79.38    4.40
   1   9   7   78.48    4.16
   1  -9   8  177.14    6.82
   1   9   8  178.77    6.40
   1  -9   9    1.73    1.68
   1   9   9    0.72    1.14
   1  -9  10  219.97    8.11
   1   9  10  216.57    7.78
   1  -9  11   44.75    4.26
   1   9  11   39.28    3.59
   1  -9  12  137.80    7.28
   1   9  12  138.68    6.76
   1  -9  13    1.26    1.71
   1   9  13    1.52    1.88
   1  -9  14  100.15    6.47
   1   9  14   82.70    5.75
   1  -9  15    1.09    1.78
   1   9  15    1.55    1.81
   1  -9  16   17.75    3.85
   1   9  16   13.67    3.01
   1  -9  17    0.27    2.65
   1   9  17    2.16    2.56
   1  -9  18   12.81    3.79
   1   9  18   11.02    3.03
   1  -9  19    5.77    3.42
   1   9  19    5.77    2.67
   1  -9  20   18.38    4.39
   1   9  20   13.40    3.87
   1  -9  21    4.73    3.40
   1   9  21    3.97    3.32
   1  -9  22    3.74    3.36
   1   9  22   11.67    3.86
   1  -9  23   -0.37    3.23
   1   9  23    2.34    3.21
  -1 -10  24    1.68    3.27
  -1  10  24    0.34    3.11
  -1 -10  23    6.74    3.60
  -1  10  23    0.98    3.00
  -1 -10  22    5.12    2.79
  -1  10  22    4.67    2.90
  -1 -10  21    0.82    2.20
  -1  10  21    2.96    2.44
  -1 -10  20    6.06    3.02
  -1  10  20    1.56    2.25
  -1 -10  19    5.09    2.90
  -1  10  19    2.43    2.05
  -1 -10  18    4.98    2.32
  -1  10  18    2.84    2.19
  -1 -10  17   16.87    3.19
  -1  10  17   13.79    3.41
  -1 -10  16   10.02    2.58
  -1  10  16   14.03    3.30
  -1 -10  15   19.50    3.16
  -1  10  15   19.48    3.55
  -1 -10  14    5.65    2.13
  -1  10  14    6.97    2.24
  -1 -10  13   29.44    3.56
  -1  10  13   26.31    3.33
  -1 -10  12    1.61    1.83
  -1  10  12    1.67    1.56
  -1 -10  11   -0.32    1.51
  -1  10  11   -0.70    1.17
  -1 -10  10    3.55    1.50
  -1  10  10    4.81    1.68
  -1 -10   9    3.24    1.62
  -1  10   9   92.69    4.97
  -1 -10   8   18.33    2.13
  -1  10   8   13.68    2.04
  -1 -10   7   10.87    1.80
  -1  10   7   10.62    2.06
  -1 -10   6    1.33    1.08
  -1  10   6    1.04    1.27
  -1 -10   5   34.42    2.25
  -1  10   5   33.46    2.58
  -1 -10   4   11.77    1.44
  -1  10   4   11.25    1.69
  -1 -10   3   18.26    1.56
  -1  10   3   13.46    1.60
  -1  10   2   59.60    2.97
   1  10  -2   62.16    2.47
  -1  10   1   72.65    3.29
   1  10  -1   75.14    2.65
  -1  10   0  126.06    4.26
   1  10   0  124.41    3.47
  -1  10  -1  429.00    8.12
   1  10   1  423.40    6.69
  -1  10  -2  111.84    4.14
   1  10   2  118.71    3.66
  -1  10  -3   13.11    1.78
   1  10   3   14.81    1.59
   1 -10   4    0.64    1.15
   1  10   4    0.06    0.93
   1 -10   5    4.41    1.27
   1  10   5    4.29    1.36
   1 -10   6    6.56    1.77
   1  10   6    7.15    1.43
   1 -10   7    0.50    1.17
   1  10   7   -0.74    0.89
   1 -10   8   11.47    2.01
   1  10   8   14.23    2.05
   1 -10   9   13.69    2.22
   1  10   9   15.32    2.25
   1 -10  10    5.92    2.34
   1  10  10    9.91    2.05
   1 -10  11   72.83    5.05
   1  10  11   72.98    4.98
   1 -10  12   16.93    2.95
   1  10  12   14.39    2.79
   1 -10  13    1.50    1.82
   1  10  13    3.10    2.16
   1 -10  14   18.09    3.59
   1  10  14   15.88    3.21
   1 -10  15    0.41    1.90
   1  10  15    0.93    1.76
   1 -10  16    0.21    1.96
   1  10  16   -0.50    2.22
   1 -10  17   -1.11    2.58
   1  10  17   -0.63    1.77
   1 -10  18   -0.66    2.81
   1  10  18    2.10    2.67
   1 -10  19    7.49    3.48
   1  10  19    5.03    2.45
   1 -10  20    0.85    2.31
   1  10  20    1.89    2.33
   1 -10  21   -0.02    2.08
   1  10  21    1.86    2.27
   1 -10  22    0.81    3.05
   1  10  22    0.70    2.17
   1 -10  23   -0.07    3.27
   1  10  23   -0.59    2.22
  -1 -11  24    1.65    3.39
  -1  11  24    5.14    3.59
  -1 -11  23    4.49    2.74
  -1  11  23    6.72    3.21
  -1 -11  22    6.65    2.98
  -1  11  22    4.54    2.88
  -1 -11  21   19.78    4.26
  -1  11  21   11.09    3.76
  -1 -11  20    3.30    2.90
  -1  11  20    2.64    2.32
  -1 -11  19   14.15    3.61
  -1  11  19   10.03    3.00
  -1 -11  18    2.54    2.13
  -1  11  18    3.57    2.79
  -1 -11  17   25.01    3.73
  -1  11  17   22.33    3.66
  -1 -11  16    2.21    1.95
  -1  11  16    1.54    1.90
  -1 -11  15   23.64    3.41
  -1  11  15   23.80    3.79
  -1 -11  14  109.59    6.58
  -1  11  14   86.77    5.99
  -1 -11  13   31.32    3.48
  -1  11  13   28.95    3.53
  -1 -11  12   31.98    3.32
  -1  11  12   37.94    3.85
  -1 -11  11   35.95    3.36
  -1  11  11   34.77    3.53
  -1 -11  10   34.50    3.18
  -1  11  10   32.85    3.49
  -1 -11   9   15.35    2.36
  -1  11   9   15.11    2.52
  -1 -11   8  132.59    5.31
  -1  11   8  139.03    6.06
  -1 -11   7  146.28    5.30
  -1  11   7  148.68    5.95
  -1 -11   6   50.47    3.08
  -1  11   6   48.59    3.45
  -1 -11   5  208.11    5.59
  -1  11   5  209.78    6.43
  -1 -11   4    5.36    1.11
  -1  11   4    6.13    1.28
  -1  11   3    1.89    1.16
   1  11  -3    1.79    0.85
  -1  11   2    1.12    0.83
   1  11  -2    0.17    0.78
  -1  11   1  518.66    9.26
   1  11  -1  513.81    7.61
  -1  11   0  115.83    4.30
   1  11   0  113.11    3.50
   1  11   1    4.05    0.99
  -1  11  -2  143.82    4.93
   1  11   2  148.07    4.33
  -1  11  -3   24.84    2.37
   1  11   3   28.85    2.15
   1 -11   4    5.61    1.53
   1  11   4    4.89    1.16
   1 -11   5  275.34    7.46
   1  11   5  294.45    7.25
   1 -11   6    0.09    1.33
   1  11   6   -0.04    0.92
   1 -11   7  172.64    6.49
   1  11   7  172.47    6.09
   1 -11   8    3.42    1.42
   1  11   8    2.75    1.24
   1 -11   9  123.14    5.96
   1  11   9  106.26    5.28
   1 -11  10    3.39    1.59
   1  11  10    4.51    1.63
   1 -11  11   61.08    4.90
   1  11  11   63.03    4.60
   1 -11  12    1.04    2.10
   1  11  12    0.66    1.37
   1 -11  13   25.60    3.86
   1  11  13   24.24    3.46
   1 -11  14   17.76    3.24
   1  11  14   19.12    3.41
   1 -11  15   40.30    4.55
   1  11  15   40.73    4.42
   1 -11  16    6.48    2.48
   1  11  16    7.76    2.43
   1 -11  17    5.33    3.14
   1  11  17    8.92    3.03
   1 -11  18    1.50    3.13
   1  11  18    1.56    2.02
   1 -11  19    5.06    2.70
   1  11  19    6.34    2.53
   1 -11  20    0.07    2.13
   1  11  20    0.00    2.58
   1 -11  21    6.18    2.95
   1  11  21    5.87    3.27
   1 -11  22    2.91    2.56
   1  11  22   -1.05    2.14
   1 -11  23    0.75    2.61
   1  11  23    3.07    2.67
  -1 -12  24    1.13    2.58
  -1  12  24   -2.41    2.25
  -1 -12  23    4.22    2.81
  -1  12  23    0.17    2.40
  -1 -12  22    7.13    3.53
  -1  12  22    6.41    3.64
  -1 -12  21    1.62    2.86
  -1  12  21    0.17    2.20
  -1 -12  20    2.45    2.83
  -1  12  20    0.44    2.74
  -1 -12  19    3.19    2.76
  -1  12  19   -0.97    1.90
  -1 -12  18    3.05    2.18
  -1  12  18    6.01    2.58
  -1 -12  17   19.58    3.48
  -1  12  17   16.45    3.35
  -1 -12  16   -0.02    2.34
  -1  12  16    0.55    1.89
  -1 -12  15    9.57    2.83
  -1  12  15    6.86    2.44
  -1 -12  14    6.39    2.17
  -1  12  14    8.09    2.83
  -1 -12  13    0.89    1.63
  -1  12  13    0.43    1.68
  -1 -12  12    0.83    1.39
  -1  12  12    0.24    1.50
  -1 -12  11    0.23    1.67
  -1  12  11   -0.06    1.37
  -1 -12  10    2.02    1.28
  -1  12  10    2.05    1.53
  -1 -12   9   75.46    4.38
  -1  12   9   74.57    4.79
  -1 -12   8    0.38    1.44
  -1  12   8    0.38    1.65
  -1 -12   7   38.94    2.88
  -1  12   7   39.87    3.24
  -1 -12   6   21.13    2.18
  -1  12   6   22.68    2.42
  -1 -12   5   -0.33    0.93
  -1  12   5    0.08    1.28
  -1 -12   4    6.90    1.30
  -1  12   4    7.83    1.48
  -1  12   3   12.45    1.64
   1  12  -3   12.88    1.45
  -1  12   2   32.22    2.40
   1  12  -2   36.96    2.16
  -1  12   1  166.64    5.34
   1  12  -1  167.83    4.42
  -1  12   0  355.59    7.73
   1  12   0  371.68    6.70
  -1  12  -1  195.98    5.76
   1  12   1  189.91    4.80
  -1  12  -2  260.46    6.83
   1  12   2  266.07    5.98
  -1  12  -3   26.24    2.48
   1  12   3   32.24    2.34
   1 -12   4   27.92    2.48
   1  12   4   27.50    2.23
   1 -12   5    0.02    1.31
   1  12   5    0.94    1.27
   1 -12   6    0.36    0.99
   1  12   6   -0.79    1.20
   1 -12   7    1.38    1.54
   1  12   7   -0.31    1.40
   1 -12   8   -0.12    1.10
   1  12   8    0.99    1.15
   1 -12   9    0.25    1.69
   1  12   9   -1.15    1.44
   1 -12  10    5.57    2.15
   1  12  10    5.29    1.98
   1 -12  11   28.16    3.33
   1  12  11   28.20    3.37
   1 -12  12   41.93    4.13
   1  12  12   40.86    3.84
   1 -12  13    8.76    2.51
   1  12  13    8.65    2.21
   1 -12  14    0.20    1.96
   1  12  14   -0.41    1.41
   1 -12  15    7.53    3.13
   1  12  15    7.48    2.34
   1 -12  16   -0.43    1.83
   1  12  16    2.00    1.86
   1 -12  17    0.92    2.70
   1  12  17    2.57    2.53
   1  12  18    2.06    2.01
   1 -12  19    0.88    2.36
   1  12  19    1.15    2.56
   1 -12  20    6.89    2.90
   1  12  20    3.63    2.41
   1 -12  21   -0.93    2.22
   1  12  21    0.66    2.73
   1 -12  22    0.69    2.31
   1  12  22   -0.26    2.86
   1 -12  23    1.08    2.65
   1  12  23    1.09    3.16
  -1 -13  24    1.09    2.48
  -1  13  24    0.68    2.44
  -1 -13  23    8.24    3.84
  -1  13  23    5.56    3.51
  -1 -13  22    5.68    3.40
  -1  13  22    4.67    2.80
  -1 -13  21    6.76    3.32
  -1  13  21    6.29    3.50
  -1 -13  20    3.82    2.98
  -1  13  20    5.09    2.70
  -1 -13  19    5.80    2.54
  -1  13  19    5.38    2.60
  -1 -13  18   -0.19    1.73
  -1  13  18   -0.30    2.51
  -1 -13  17    4.23    3.05
  -1  13  17    6.06    2.99
  -1 -13  16   17.00    3.67
  -1  13  16   21.47    3.61
  -1 -13  15   15.11    3.19
  -1  13  15   15.93    3.11
  -1 -13  14   17.34    2.94
  -1  13  14   17.29    3.61
  -1 -13  13  171.49    7.96
  -1  13  13  177.80    8.31
  -1 -13  12    1.62    1.51
  -1  13  12    0.97    1.53
  -1 -13  11   40.04    3.65
  -1  13  11   40.49    4.11
  -1 -13  10   29.41    3.15
  -1  13  10   30.91    3.39
  -1 -13   9  196.70    6.89
  -1  13   9  199.96    7.93
  -1 -13   8    1.16    1.37
  -1  13   8    2.32    1.41
  -1 -13   7  181.89    6.23
  -1  13   7  192.97    7.12
  -1 -13   6  130.09    4.88
  -1  13   6  134.23    5.65
  -1 -13   5   12.35    1.67
  -1  13   5   11.56    1.83
  -1 -13   4   82.13    3.60
  -1  13   4   75.66    4.03
  -1  13   3   34.41    2.63
   1  13  -3   35.40    2.27
  -1  13   2   51.70    3.08
   1  13  -2   48.71    2.54
  -1  13   1   58.55    3.27
   1  13  -1   58.76    2.74
   1  13   0    4.96    1.16
  -1  13  -1  510.93    9.73
   1  13   1  517.19    8.47
  -1  13  -2   55.62    3.25
   1  13   2   60.62    3.05
  -1  13  -3  301.12    7.70
   1  13   3  329.94    7.31
   1  13   4   31.27    2.54
   1 -13   5   -0.23    0.84
   1  13   5   -0.39    0.85
   1 -13   6   76.96    4.35
   1  13   6   86.80    4.44
   1 -13   7  194.66    7.20
   1  13   7  183.99    6.63
   1 -13   8   54.42    4.03
   1  13   8   57.65    3.94
   1 -13   9   23.60    2.90
   1  13   9   20.45    2.60
   1 -13  10   48.00    4.06
   1  13  10   47.73    3.88
   1 -13  11   -1.79    1.72
   1  13  11   -0.51    1.13
   1 -13  12    1.43    1.69
   1  13  12    1.09    1.40
   1 -13  13   35.66    4.12
   1  13  13   33.98    3.75
   1 -13  14   14.02    3.03
   1  13  14   14.99    3.07
   1 -13  15   11.67    3.47
   1  13  15   13.35    3.19
   1 -13  16   12.16    3.03
   1  13  16    6.41    2.29
   1 -13  17   23.19    4.25
   1  13  17   19.24    3.49
   1 -13  18    0.89    2.20
   1  13  18    2.59    2.69
   1 -13  19    0.95    2.29
   1  13  19    2.68    2.21
   1 -13  20   -0.18    2.11
   1  13  20    2.11    2.77
   1 -13  21    0.52    2.34
   1  13  21    0.72    2.25
   1 -13  22    6.49    3.82
   1  13  22    0.82    2.34
   1 -13  23    2.33    3.47
   1  13  23    1.34    3.36
  -1 -14  24    0.67    3.59
  -1  14  24    3.07    3.37
  -1 -14  23    1.13    3.22
  -1  14  23    4.45    2.91
  -1 -14  22    0.45    2.99
  -1  14  22    3.84    2.57
  -1 -14  21    8.03    2.96
  -1  14  21    9.63    3.27
  -1 -14  20   -1.66    1.84
  -1  14  20    1.00    2.89
  -1 -14  19   -0.55    1.84
  -1  14  19   -0.07    1.96
  -1 -14  18    3.22    2.11
  -1  14  18    0.06    1.91
  -1 -14  17    7.48    2.53
  -1  14  17    4.35    2.28
  -1 -14  16   10.10    3.27
  -1  14  16    9.94    3.16
  -1 -14  15    4.68    1.96
  -1  14  15    5.24    2.28
  -1 -14  14    2.40    1.83
  -1  14  14    3.83    2.64
  -1 -14  13    3.63    1.94
  -1  14  13    1.48    1.76
  -1 -14  12    4.03    2.22
  -1  14  12    1.95    1.86
  -1 -14  11   14.93    2.68
  -1  14  11   14.34    2.67
  -1 -14  10    1.85    1.36
  -1  14  10    0.96    1.94
  -1 -14   9   -0.59    1.13
  -1  14   9    0.31    1.32
  -1 -14   8   31.57    3.02
  -1  14   8   30.99    3.40
  -1 -14   7   31.42    2.84
  -1  14   7   12.49    2.13
  -1 -14   6   17.68    2.15
  -1  14   6   19.01    2.57
  -1 -14   5    1.64    1.10
  -1  14   5    2.80    1.62
  -1 -14   4    8.85    1.52
  -1  14   4    7.92    1.56
  -1  14   3   12.59    1.94
   1  14  -3   11.38    1.54
  -1  14   2    5.51    1.53
   1  14  -2    7.31    1.31
  -1  14   1    3.73    1.18
   1  14  -1    7.69    1.33
  -1  14   0    1.20    0.97
   1  14   0    1.38    1.01
  -1  14  -1  449.37    9.42
   1  14   1  439.64    8.03
  -1  14  -2   68.55    3.71
   1  14   2   66.73    3.30
  -1  14  -3   32.03    2.75
   1  14   3   33.77    2.61
  -1  14  -4   18.64    2.25
   1  14   4   21.52    2.26
   1 -14   5    8.83    1.91
   1  14   5    6.85    1.70
   1 -14   6   -1.98    1.25
   1  14   6    0.31    0.97
   1 -14   7   15.34    2.50
   1  14   7   20.41    2.62
   1 -14   8   -0.14    1.09
   1  14   8    1.06    1.27
   1 -14   9    7.70    2.21
   1  14   9    5.76    1.69
   1 -14  10   26.88    3.20
   1  14  10   28.59    3.40
   1 -14  11    7.35    2.45
   1  14  11    7.33    1.96
   1 -14  12    1.08    1.64
   1  14  12    2.16    1.99
   1 -14  13    0.06    1.67
   1  14  13    0.33    1.58
   1 -14  14    6.95    2.54
   1  14  14    2.67    2.33
   1 -14  15   -1.69    2.51
   1  14  15    1.08    2.32
   1 -14  16    1.37    2.01
   1  14  16   -0.03    2.14
   1 -14  17    0.84    2.72
   1  14  17    0.31    1.85
   1 -14  18   -0.87    1.90
   1  14  18   -0.49    2.01
   1 -14  19    8.18    3.04
   1  14  19    3.46    3.03
   1 -14  20    1.25    3.06
   1  14  20    3.02    2.41
   1 -14  21   -3.67    2.71
   1  14  21    0.58    2.88
   1 -14  22   -0.80    3.28
   1  14  22   -1.03    2.20
   1 -14  23    0.27    3.30
   1  14  23   -0.95    2.40
  -1 -15  23   -0.58    2.22
  -1  15  23    2.18    2.63
  -1 -15  22    6.49    2.99
  -1  15  22   12.19    3.90
  -1 -15  21    2.92    2.54
  -1  15  21    3.21    2.50
  -1 -15  20    6.13    2.72
  -1  15  20    6.58    2.88
  -1 -15  19    1.60    2.18
  -1  15  19    2.79    2.40
  -1 -15  18    4.66    2.40
  -1  15  18    5.17    2.62
  -1 -15  17    0.81    1.89
  -1  15  17   -0.70    1.66
  -1 -15  16    2.31    2.46
  -1  15  16    0.44    1.87
  -1 -15  15    9.95    2.52
  -1  15  15   14.91    3.45
  -1 -15  14   54.34    5.03
  -1  15  14   50.46    4.99
  -1 -15  13    1.40    1.67
  -1  15  13    1.10    1.90
  -1 -15  12  140.68    7.02
  -1  15  12  150.70    7.94
  -1 -15  11   -0.04    1.23
  -1  15  11   -0.23    1.39
  -1 -15  10  118.63    5.85
  -1  15  10  111.56    6.23
  -1 -15   9    1.17    1.54
  -1  15   9    1.78    1.54
  -1 -15   8  201.35    6.99
  -1  15   8  223.19    8.17
  -1 -15   7    1.03    1.05
  -1  15   7   -1.00    1.46
  -1 -15   6   96.75    4.40
  -1  15   6  102.79    5.22
  -1 -15   5   64.93    3.39
  -1  15   5   69.62    4.16
  -1 -15   4   10.36    1.62
  -1  15   4   11.28    2.04
  -1  15   3   17.66    2.26
   1  15  -3   17.38    1.87
  -1  15   2  196.29    6.38
   1  15  -2  184.16    5.20
  -1  15   1  170.84    5.86
   1  15  -1  172.39    5.02
  -1  15   0  148.77    5.48
   1  15   0  145.65    4.68
   1  15   1    1.58    1.15
  -1  15  -2  706.82   12.32
   1  15   2  740.54   11.51
  -1  15  -3  131.43    5.47
   1  15   3  134.61    4.95
  -1  15  -4  141.50    5.70
   1  15   4  141.52    5.32
   1 -15   5    8.92    1.73
   1  15   5    9.88    1.86
   1 -15   6   52.56    3.82
   1  15   6   55.05    3.68
   1 -15   7    4.13    1.51
   1  15   7    3.19    1.73
   1 -15   8   90.47    5.21
   1  15   8   95.49    5.32
   1 -15   9    1.79    1.79
   1  15   9    4.28    1.94
   1 -15  10    4.20    2.11
   1  15  10    2.22    1.49
   1 -15  11   -0.24    1.26
   1  15  11    0.63    1.80
   1 -15  12   16.99    3.26
   1  15  12   15.33    3.05
   1 -15  13   12.07    2.71
   1  15  13   13.24    2.70
   1 -15  14   40.17    4.60
   1  15  14   31.31    4.12
   1 -15  15   -0.99    2.50
   1  15  15   -1.47    2.00
   1 -15  16   23.09    3.88
   1  15  16   21.91    3.87
   1 -15  17   -0.49    2.60
   1  15  17    0.23    2.41
   1 -15  18   20.15    3.88
   1  15  18   14.23    3.41
   1 -15  19    0.95    3.03
   1  15  19    0.26    2.03
   1 -15  20    2.87    3.33
   1  15  20    1.91    3.02
   1 -15  21    0.42    3.09
   1  15  21    0.70    2.29
   1 -15  22    2.72    2.83
   1  15  22    7.07    3.74
   1 -15  23    0.21    2.40
   1  15  23   -2.30    2.85
  -1 -16  23    3.07    3.41
  -1  16  23    6.56    3.84
  -1 -16  22    4.07    3.49
  -1  16  22    3.68    2.86
  -1 -16  21   -0.87    2.83
  -1  16  21    0.96    2.91
  -1 -16  20    3.86    3.25
  -1  16  20    2.87    3.07
  -1 -16  19    0.45    2.72
  -1  16  19    0.74    2.82
  -1 -16  18    3.37    2.22
  -1  16  18    2.03    2.79
  -1 -16  17   -3.01    1.49
  -1  16  17    0.68    2.52
  -1 -16  16   -4.12    1.93
  -1  16  16   -0.48    1.79
  -1 -16  15    0.68    1.73
  -1  16  15    1.45    2.60
  -1 -16  14    5.46    2.65
  -1  16  14    5.67    2.50
  -1 -16  13    1.51    1.83
  -1  16  13    2.96    2.12
  -1 -16  12   23.58    3.21
  -1  16  12   24.56    3.76
  -1 -16  11    1.08    1.84
  -1  16  11    1.19    1.56
  -1 -16  10    1.22    1.40
  -1  16  10    3.60    1.81
  -1 -16   9   20.07    2.52
  -1  16   9   19.31    3.16
  -1 -16   8    8.84    2.12
  -1  16   8    7.76    2.35
  -1 -16   7   -0.48    1.30
  -1  16   7   -1.33    1.11
  -1 -16   6    8.78    1.79
  -1  16   6    9.20    2.21
  -1 -16   5   34.85    2.78
  -1  16   5   41.41    3.51
  -1 -16   4   10.97    1.67
  -1  16   4   11.59    2.17
  -1  16   3   11.11    2.06
   1  16  -3   12.35    1.71
  -1  16   2    8.66    1.68
   1  16  -2    8.40    1.48
  -1  16   1    4.60    1.72
   1  16  -1    6.79    1.45
  -1  16   0  431.28    9.47
   1  16   0  439.23    8.51
  -1  16  -1    1.56    1.22
   1  16   1    0.89    1.15
   1  16   2    4.45    1.45
  -1  16  -3    1.24    1.61
   1  16   3    0.69    1.24
   1  16   4    0.45    1.27
   1 -16   5   22.18    2.54
   1  16   5   24.87    2.59
   1 -16   6   13.92    2.36
   1  16   6   13.12    2.03
   1 -16   7   13.57    2.22
   1  16   7   15.56    2.58
   1 -16   8   18.33    2.59
   1  16   8   19.33    2.89
   1 -16   9   10.35    2.46
   1  16   9   13.80    2.45
   1 -16  10   -0.48    1.64
   1  16  10   -1.53    1.57
   1 -16  11   -0.67    1.16
   1  16  11    0.96    1.41
   1 -16  12    9.27    2.82
   1  16  12    7.20    2.18
   1 -16  13   -0.19    1.64
   1  16  13    1.04    1.71
   1 -16  14    0.14    1.85
   1  16  14    1.73    2.41
   1 -16  15   -2.10    2.40
   1  16  15    0.97    2.43
   1 -16  16    6.03    3.18
   1  16  16    5.77    2.42
   1 -16  17    1.15    2.15
   1  16  17   -0.47    1.79
   1 -16  18    2.80    2.28
   1  16  18    3.91    3.08
   1 -16  19    3.56    3.29
   1  16  19    1.01    2.82
   1 -16  20    4.11    2.65
   1  16  20    4.99    2.70
   1 -16  21    0.36    2.33
   1  16  21    0.71    3.07
   1 -16  22   -1.08    2.35
   1  16  22   -1.78    2.20
  -1 -17  23    3.62    3.49
  -1  17  23    3.36    3.60
  -1 -17  22    0.36    3.14
  -1  17  22    1.10    3.29
  -1 -17  21    7.09    3.49
  -1  17  21    3.22    2.78
  -1 -17  20   -0.23    3.06
  -1  17  20    0.60    2.32
  -1 -17  19    5.48    3.26
  -1  17  19    5.63    2.77
  -1 -17  18   20.10    4.12
  -1  17  18   20.05    3.91
  -1 -17  17    1.68    1.98
  -1  17  17    2.12    2.22
  -1 -17  16   -3.52    1.96
  -1  17  16   -0.80    2.50
  -1 -17  15    8.89    2.90
  -1  17  15    8.87    2.70
  -1 -17  14    6.68    2.74
  -1  17  14    7.74    2.63
  -1 -17  13   88.46    6.10
  -1  17  13   73.69    5.85
  -1 -17  12   54.22    4.73
  -1  17  12   52.00    4.98
  -1 -17  11  112.08    6.14
  -1  17  11  107.96    6.58
  -1 -17  10   -0.88    1.59
  -1  17  10    0.16    1.45
  -1 -17   9  207.47    7.70
  -1  17   9  205.27    8.48
  -1 -17   8   29.21    3.05
  -1  17   8   29.94    3.50
  -1 -17   7   99.00    4.92
  -1  17   7   94.56    5.46
  -1 -17   6   23.68    2.48
  -1  17   6   22.80    3.00
  -1 -17   5   39.25    2.88
  -1  17   5   41.16    3.55
  -1  17   4   50.31    3.78
   1  17  -4   50.59    3.17
  -1  17   3  101.78    4.90
   1  17  -3   98.33    4.19
  -1  17   2   17.01    2.41
   1  17  -2   18.12    1.97
  -1  17   1  182.34    6.45
   1  17  -1  173.28    5.40
  -1  17  -1  207.66    6.77
   1  17   1  224.67    6.42
  -1  17  -2  136.70    5.62
   1  17   2  142.30    5.20
  -1  17  -3  159.70    6.13
   1  17   3  169.27    5.89
  -1  17  -4   60.72    4.01
   1  17   4   65.59    3.91
   1 -17   5   34.43    3.10
   1  17   5   39.46    3.24
   1 -17   6   10.47    2.21
   1  17   6   10.68    1.93
   1 -17   7   39.09    3.63
   1  17   7   41.56    3.69
   1 -17   8    4.00    1.86
   1  17   8    4.32    1.62
   1 -17   9    0.41    1.26
   1  17   9    1.22    1.85
   1 -17  10    0.47    1.80
   1  17  10    0.68    1.46
   1 -17  11    0.16    1.38
   1  17  11   -0.53    1.88
   1 -17  12   28.53    3.86
   1  17  12   28.15    3.63
   1 -17  13   23.91    3.52
   1  17  13   22.50    3.41
   1 -17  14   14.09    3.06
   1  17  14   13.03    3.19
   1 -17  15    6.74    2.63
   1  17  15    8.17    2.50
   1 -17  16   -1.05    2.62
   1  17  16    1.31    1.94
   1 -17  17   19.89    3.75
   1  17  17   13.03    3.19
   1 -17  18   19.33    4.19
   1  17  18   14.51    3.42
   1 -17  19    6.16    2.90
   1  17  19    4.59    2.61
   1 -17  20    3.18    2.54
   1  17  20   -1.61    2.62
   1 -17  21    1.79    3.38
   1  17  21    1.14    2.55
   1 -17  22   -0.54    3.33
   1  17  22   -1.17    2.92
  -1 -18  23   -0.23    2.34
  -1  18  23    2.34    2.70
  -1 -18  22   -0.36    2.19
  -1  18  22    1.79    3.14
  -1 -18  21    7.86    3.04
  -1  18  21    9.57    3.97
  -1 -18  20   -0.47    2.16
  -1  18  20   -0.90    2.80
  -1 -18  19    0.99    2.32
  -1  18  19    1.88    3.07
  -1  18  18    1.41    2.98
  -1 -18  17    0.15    2.44
  -1  18  17    1.83    2.07
  -1 -18  16    0.13    1.70
  -1  18  16   -0.17    1.79
  -1 -18  15    0.30    2.32
  -1  18  15    3.86    2.21
  -1 -18  14   -1.03    2.22
  -1  18  14   -0.57    1.77
  -1 -18  13    4.12    2.55
  -1  18  13    5.67    2.41
  -1 -18  12   -1.47    2.02
  -1  18  12    2.86    2.59
  -1 -18  11    8.36    2.49
  -1  18  11    7.24    2.30
  -1 -18  10    0.55    1.65
  -1  18  10    0.38    1.52
  -1 -18   9    2.10    1.84
  -1  18   9    3.12    1.76
  -1 -18   8    2.93    1.70
  -1  18   8    2.97    1.74
  -1 -18   7   63.13    4.05
  -1  18   7   59.78    4.65
  -1 -18   6   37.46    3.06
  -1  18   6   42.60    3.69
  -1 -18   5   79.69    4.19
  -1  18   5   75.51    4.68
  -1  18   4   -0.22    1.45
   1  18  -4   -1.13    1.08
  -1  18   3    2.94    1.32
   1  18  -3    6.80    1.51
  -1  18   2   49.75    3.54
   1  18  -2   47.93    2.99
  -1  18   1  120.63    5.42
   1  18  -1  113.67    4.50
  -1  18   0    2.43    1.51
   1  18   0    0.80    1.33
  -1  18  -1    8.01    1.91
   1  18   1    2.53    1.30
  -1  18  -2   73.28    4.30
   1  18   2   72.65    3.90
  -1  18  -3   88.16    4.80
   1  18   3   80.69    4.30
  -1  18  -4   24.75    2.89
   1  18   4   29.69    2.88
   1 -18   5    1.65    1.65
   1  18   5    5.51    1.76
   1 -18   6    0.29    1.54
   1  18   6   -1.37    0.91
   1 -18   7    0.19    1.48
   1  18   7    0.82    1.23
   1 -18   8   -0.48    1.52
   1  18   8    0.51    1.30
   1 -18   9    9.51    2.12
   1  18   9   13.11    2.74
   1 -18  10   16.91    3.01
   1  18  10   18.14    2.82
   1 -18  11    1.82    1.60
   1  18  11   -1.43    1.92
   1 -18  12    1.57    2.29
   1  18  12    0.04    2.18
   1 -18  13   12.55    2.82
   1  18  13   13.75    3.39
   1 -18  14    0.26    1.87
   1  18  14    1.91    2.55
   1 -18  15   12.94    3.24
   1  18  15    3.06    2.05
   1 -18  16    4.01    3.07
   1  18  16    0.22    1.93
   1 -18  17    1.86    2.86
   1  18  17    0.36    2.63
   1 -18  18    3.20    2.46
   1  18  18    5.54    3.07
   1 -18  19    5.38    2.77
   1  18  19    5.54    2.81
   1 -18  20    2.14    3.28
   1  18  20    1.22    2.40
   1 -18  21    0.43    2.45
   1  18  21    0.13    3.03
   1 -18  22    3.09    2.87
   1  18  22    0.37    2.50
  -1 -19  22    0.04    3.32
  -1  19  22    1.04    2.59
  -1 -19  21    1.90    3.18
  -1  19  21    1.34    2.60
  -1 -19  20   -2.23    2.81
  -1  19  20    3.04    2.66
  -1 -19  19   19.83    3.87
  -1  19  19   17.80    3.97
  -1  19  18    0.72    2.19
  -1 -19  17    5.21    2.93
  -1  19  17    7.45    3.28
  -1 -19  16   -0.01    1.71
  -1  19  16    3.32    2.17
  -1 -19  15    3.72    2.68
  -1  19  15    5.82    2.89
  -1 -19  14   18.23    3.54
  -1  19  14   17.49    3.75
  -1 -19  13   63.43    5.32
  -1  19  13   63.70    5.70
  -1 -19  12   51.18    4.70
  -1  19  12   53.38    5.29
  -1 -19  11   23.11    3.30
  -1  19  11   26.84    3.63
  -1 -19  10   49.55    4.20
  -1  19  10   57.19    5.00
  -1 -19   9   48.86    4.05
  -1  19   9   46.04    4.24
  -1 -19   8   54.18    4.04
  -1  19   8   57.61    4.68
  -1 -19   7   13.67    2.27
  -1  19   7   20.03    3.09
  -1 -19   6    1.73    1.38
  -1  19   6    3.26    1.58
  -1 -19   5    0.05    1.19
  -1  19   5   -0.98    1.07
  -1  19   4   35.31    3.42
   1  19  -4   31.03    2.71
  -1  19   3  149.85    6.31
   1  19  -3  150.92    5.44
  -1  19   2   36.73    3.30
   1  19  -2   31.85    2.59
  -1  19   1   23.04    2.69
   1  19  -1   21.90    2.32
  -1  19   0    4.75    1.41
   1  19   0    4.92    1.42
  -1  19  -1   46.95    3.56
   1  19   1   52.94    3.37
  -1  19  -2   86.97    4.73
   1  19   2   82.06    4.25
  -1  19  -3  242.85    7.92
   1  19   3  265.69    7.77
  -1  19  -4   17.92    2.39
   1  19   4   18.26    2.32
   1 -19   5   59.87    4.26
   1  19   5   67.38    4.36
   1 -19   6    6.97    2.07
   1  19   6    8.58    2.20
   1 -19   7   29.97    3.17
   1  19   7   32.73    3.44
   1 -19   8    2.04    1.40
   1  19   8    2.40    1.86
   1 -19   9   16.47    2.96
   1  19   9   14.18    2.87
   1 -19  10    7.40    2.49
   1  19  10    5.10    2.36
   1 -19  11    6.10    2.41
   1  19  11    9.05    2.36
   1 -19  12    3.66    1.89
   1  19  12    2.28    2.49
   1 -19  13   44.46    4.64
   1  19  13   49.78    5.33
   1 -19  14   -0.09    1.84
   1  19  14   -1.94    2.29
   1 -19  15    6.16    2.60
   1  19  15    7.99    2.68
   1 -19  16    1.96    2.16
   1  19  16    1.14    2.51
   1 -19  17   20.27    4.36
   1  19  17   19.53    4.19
   1 -19  18    6.38    2.79
   1  19  18    7.84    3.50
   1 -19  19   12.79    3.89
   1  19  19   13.96    4.02
   1 -19  20   -0.67    2.31
   1  19  20    1.82    3.03
   1 -19  21    2.72    2.76
   1  19  21    0.98    2.62
   1 -19  22   -1.02    3.32
   1  19  22    1.16    3.36
  -1 -20  22    0.21    2.28
  -1  20  22    1.68    3.55
  -1 -20  21    0.29    2.35
  -1  20  21    1.40    3.12
  -1 -20  20   -0.34    3.02
  -1  20  20    0.54    3.01
  -1 -20  19    1.23    2.96
  -1  20  19    0.67    2.79
  -1 -20  18   -0.72    1.98
  -1  20  18    1.07    2.83
  -1 -20  17    1.07    2.56
  -1  20  17    3.96    2.55
  -1 -20  16   -2.07    2.33
  -1  20  16   -1.86    2.36
  -1 -20  15   -0.07    2.32
  -1  20  15    2.47    2.78
  -1 -20  14   -0.08    1.67
  -1  20  14    1.03    2.56
  -1 -20  13    3.79    2.02
  -1  20  13    7.40    2.66
  -1 -20  12   12.59    2.95
  -1  20  12   13.82    3.43
  -1 -20  11    4.51    2.31
  -1  20  11    5.55    2.21
  -1 -20  10    0.35    1.79
  -1  20  10    2.41    2.24
  -1 -20   9    1.31    1.73
  -1  20   9   -0.24    1.41
  -1 -20   8    0.04    1.56
  -1  20   8    1.72    1.59
  -1 -20   7   30.81    3.08
  -1  20   7   26.43    3.25
  -1 -20   6   59.02    3.83
  -1  20   6   58.48    4.48
  -1 -20   5   -0.36    0.85
  -1  20   5   -1.19    1.53
  -1  20   4   22.98    2.75
   1  20  -4   23.35    2.44
  -1  20   3   19.44    2.57
   1  20  -3   17.19    2.14
  -1  20   2   51.40    3.91
   1  20  -2   43.81    3.04
  -1  20   1   18.44    2.60
   1  20  -1   19.84    2.21
  -1  20   0   13.04    2.05
   1  20   0   11.83    1.85
  -1  20  -1    2.56    1.28
   1  20   1    3.84    1.48
  -1  20  -2   25.26    2.91
   1  20   2   18.97    2.39
  -1  20  -3  102.72    5.35
   1  20   3   87.76    4.58
  -1  20  -4   75.58    4.79
   1  20   4   70.40    4.43
   1 -20   5   20.00    2.59
   1  20   5   22.34    2.69
   1 -20   6    2.83    1.52
   1  20   6    4.10    1.96
   1 -20   7   -0.57    1.03
   1  20   7   -2.00    1.43
   1 -20   8   18.39    2.73
   1  20   8   17.97    2.75
   1 -20   9   50.89    4.58
   1  20   9   53.76    4.54
   1 -20  10    2.09    2.07
   1  20  10   -0.82    1.44
   1 -20  11    0.00    1.97
   1  20  11   -0.58    1.48
   1 -20  12    9.52    2.49
   1  20  12   14.33    3.32
   1 -20  13    3.36    2.69
   1  20  13    2.53    2.60
   1 -20  14    0.25    2.57
   1  20  14   -0.75    2.44
   1 -20  15   -2.13    2.40
   1  20  15   -0.36    1.84
   1 -20  16    0.71    2.62
   1  20  16    0.86    2.70
   1 -20  17    4.67    2.66
   1  20  17    3.10    2.39
   1 -20  18    4.10    3.43
   1  20  18    6.81    2.96
   1 -20  19    0.23    2.15
   1  20  19   -0.30    2.36
   1 -20  20    1.46    3.35
   1  20  20    0.22    2.30
   1 -20  21    4.52    3.73
   1  20  21   -0.73    3.34
  -1 -21  22    6.81    3.73
  -1  21  22    2.60    2.93
  -1 -21  21    1.03    3.19
  -1  21  21   -1.98    2.33
  -1 -21  20    2.60    2.54
  -1  21  20    4.43    2.78
  -1 -21  19   -0.79    2.07
  -1  21  19   -1.70    2.07
  -1 -21  18   13.92    3.76
  -1  21  18   14.24    3.63
  -1 -21  17    0.37    1.96
  -1  21  17   -0.71    2.09
  -1 -21  16   -2.46    2.15
  -1  21  16    0.97    2.83
  -1 -21  15   -0.70    1.60
  -1  21  15    0.60    2.02
  -1 -21  14   20.75    3.40
  -1  21  14   22.44    4.18
  -1 -21  13    5.09    2.11
  -1  21  13    5.53    2.94
  -1 -21  12   46.30    4.31
  -1  21  12   40.26    4.65
  -1 -21  11   35.55    3.90
  -1  21  11   42.32    4.57
  -1 -21  10   16.64    2.85
  -1  21  10   16.37    3.26
  -1 -21   9    6.53    2.08
  -1  21   9    6.52    2.20
  -1 -21   8   53.37    4.07
  -1  21   8   46.85    4.36
  -1 -21   7    7.02    1.91
  -1  21   7    5.85    1.92
  -1 -21   6    9.08    1.95
  -1  21   6    9.96    2.21
  -1 -21   5    2.83    1.46
  -1  21   5    2.44    1.72
  -1  21   4   26.69    2.99
   1  21  -4   25.95    2.58
  -1  21   3    0.07    1.70
   1  21  -3   -0.99    1.08
  -1  21   2   56.96    4.05
   1  21  -2   55.03    3.55
  -1  21   1    0.33    1.47
   1  21  -1    0.68    1.17
  -1  21   0   34.47    3.23
   1  21   0   39.41    3.05
  -1  21  -1    9.75    2.14
   1  21   1    6.79    1.75
  -1  21  -2  155.26    6.46
   1  21   2  180.19    6.63
  -1  21  -3    8.32    1.92
   1  21   3    9.15    2.13
  -1  21  -4  143.07    6.53
   1  21   4  151.26    6.36
   1  21   5    2.38    1.81
   1 -21   6   57.59    4.44
   1  21   6   68.99    4.80
   1 -21   7    3.64    1.88
   1  21   7    5.75    2.16
   1 -21   8   31.95    3.76
   1  21   8   40.93    4.13
   1 -21   9   55.87    4.83
   1  21   9   55.74    4.88
   1 -21  10   26.34    3.45
   1  21  10   23.34    3.34
   1 -21  11    3.06    2.30
   1  21  11   -3.03    1.97
   1 -21  12   40.42    4.60
   1  21  12   34.68    4.50
   1 -21  13   -2.91    2.22
   1  21  13   -1.13    2.31
   1 -21  14   38.21    4.56
   1  21  14   44.93    5.27
   1 -21  15   -0.54    1.77
   1  21  15   -0.34    1.83
   1 -21  16   24.31    4.43
   1  21  16   23.61    4.29
   1 -21  17   -0.49    2.83
   1  21  17   -0.67    1.84
   1 -21  18   27.37    4.54
   1  21  18   29.25    5.08
   1 -21  19   -0.43    2.99
   1  21  19   -0.01    2.96
   1 -21  20    5.49    2.83
   1  21  20    6.73    3.43
   1 -21  21   -0.09    2.36
   1  21  21   -0.20    2.35
  -1 -22  22    0.80    2.35
  -1  22  22    1.68    2.77
  -1 -22  21   -2.89    2.84
  -1  22  21   -0.01    2.60
  -1 -22  20    0.25    3.10
  -1  22  20    1.99    3.19
  -1 -22  19   -0.37    2.87
  -1  22  19   -1.06    2.97
  -1 -22  18    2.18    2.19
  -1  22  18   -2.53    1.91
  -1 -22  17   -1.20    2.52
  -1  22  17   -0.92    2.81
  -1 -22  16    0.08    1.87
  -1  22  16    2.73    2.46
  -1 -22  15    0.31    2.40
  -1  22  15    1.27    2.13
  -1 -22  14    1.20    2.54
  -1  22  14    2.76    2.17
  -1 -22  13   -1.13    2.01
  -1  22  13    2.29    2.74
  -1 -22  12    2.70    1.81
  -1  22  12    0.37    1.80
  -1 -22  11    2.01    2.02
  -1  22  11    0.77    1.79
  -1 -22  10    1.82    1.95
  -1  22  10    1.78    2.42
  -1 -22   9    2.04    1.81
  -1  22   9   -1.04    1.48
  -1 -22   8    2.46    1.71
  -1  22   8    0.08    1.56
  -1 -22   7    1.78    1.61
  -1  22   7    1.98    1.65
  -1 -22   6   18.81    2.50
  -1  22   6   18.93    2.89
  -1 -22   5   33.81    3.11
  -1  22   5   35.56    3.73
  -1  22   4    5.12    2.03
   1  22  -4    4.78    1.55
  -1  22   3   -1.08    1.48
   1  22  -3   -0.10    1.21
  -1  22   2   49.53    3.98
   1  22  -2   42.31    3.17
  -1  22   1   19.10    2.71
   1  22  -1   19.01    2.31
  -1  22   0    5.65    1.90
   1  22   0    2.86    1.44
  -1  22  -1    0.85    1.20
   1  22   1   -1.83    1.22
  -1  22  -2   36.42    3.47
   1  22   2   28.58    3.04
  -1  22  -3   58.61    4.20
   1  22   3   63.15    4.26
  -1  22  -4   80.79    5.09
   1  22   4   82.85    4.98
   1  22   5    5.08    1.99
   1 -22   6   20.15    2.78
   1  22   6   23.17    3.19
   1 -22   7    2.86    1.58
   1  22   7    3.30    1.70
   1 -22   8   14.44    2.95
   1  22   8   21.69    3.37
   1 -22   9    5.44    1.96
   1  22   9    4.99    1.98
   1 -22  10    1.59    2.09
   1  22  10    0.40    2.06
   1 -22  11   -1.18    1.40
   1  22  11    2.30    2.40
   1 -22  12   11.35    3.18
   1  22  12    7.47    2.54
   1 -22  13    1.14    1.91
   1  22  13    1.49    2.66
   1 -22  14    3.86    2.24
   1  22  14    4.76    2.94
   1 -22  15    0.14    1.94
   1  22  15    4.07    2.80
   1 -22  16   -0.27    2.18
   1  22  16    0.55    1.98
   1 -22  17    0.90    3.14
   1  22  17    2.62    2.93
   1 -22  18    4.81    3.48
   1  22  18    0.37    3.08
   1  22  19    2.11    3.04
   1 -22  20    2.45    3.46
   1  22  20   -2.69    2.77
   1 -22  21    1.54    3.58
   1  22  21    0.34    3.30
  -1  23  21    0.41    3.33
  -1 -23  20   -0.02    2.27
  -1  23  20   -2.56    2.16
  -1 -23  19    9.05    3.67
  -1  23  19    3.36    2.77
  -1 -23  18    3.18    2.85
  -1  23  18    2.92    3.25
  -1 -23  17    1.44    2.04
  -1  23  17    3.55    2.62
  -1 -23  16   -0.46    2.53
  -1  23  16    2.67    2.41
  -1 -23  15   -0.50    2.32
  -1  23  15    0.98    2.18
  -1 -23  14   20.28    3.63
  -1  23  14   17.26    3.61
  -1 -23  13   16.40    3.26
  -1  23  13   15.63    3.71
  -1 -23  12    2.82    2.37
  -1  23  12    1.56    2.06
  -1 -23  11   15.30    2.97
  -1  23  11   15.97    3.21
  -1 -23  10    3.85    1.71
  -1  23  10    2.52    2.49
  -1 -23   9   23.00    3.07
  -1  23   9   20.53    3.32
  -1 -23   8   31.41    3.35
  -1  23   8   34.95    4.02
  -1 -23   7   18.17    2.69
  -1  23   7   17.01    3.17
  -1 -23   6   25.58    2.92
  -1  23   6   19.26    2.88
  -1 -23   5   10.46    2.06
  -1  23   5    9.49    2.41
  -1  23   4    4.63    2.00
   1  23  -4    4.31    1.56
  -1  23   3   37.02    3.70
   1  23  -3   35.99    3.10
  -1  23   2   17.56    2.72
   1  23  -2   15.02    2.18
  -1  23   1   12.93    2.46
   1  23  -1   13.30    2.09
  -1  23   0   41.83    3.70
   1  23   0   36.50    3.23
  -1  23  -1   82.09    5.01
   1  23   1   80.95    4.59
  -1  23  -2   49.71    3.89
   1  23   2   52.99    3.93
  -1  23  -3  106.01    5.74
   1  23   3  118.31    5.77
  -1  23  -4    3.47    2.02
   1  23   4    1.13    1.74
  -1  23  -5   69.67    4.83
   1  23   5   73.54    5.03
   1 -23   6   10.50    2.54
   1  23   6   10.53    2.59
   1 -23   7   36.52    3.89
   1  23   7   41.31    4.17
   1 -23   8   80.76    5.66
   1  23   8   84.35    5.81
   1 -23   9   38.78    4.20
   1  23   9   35.93    4.03
   1 -23  10    1.60    2.09
   1  23  10   -0.61    2.05
   1 -23  11   21.69    3.62
   1  23  11   27.03    4.07
   1 -23  12    0.82    1.69
   1  23  12   -0.66    1.76
   1 -23  13   49.20    5.23
   1  23  13   49.03    5.52
   1 -23  14    1.76    2.65
   1  23  14    4.48    3.07
   1 -23  15   10.64    3.37
   1  23  15    9.81    3.49
   1 -23  16    2.88    3.23
   1  23  16    2.56    2.45
   1 -23  17   24.73    4.88
   1  23  17   25.78    4.73
   1 -23  18    3.18    2.66
   1  23  18    2.75    2.58
   1  23  19   10.41    3.51
   1 -23  20   -0.37    2.31
   1  23  20    1.21    2.55
   1 -23  21    3.72    2.95
   1  23  21   -2.23    2.16
  -1  24  21   -0.23    2.55
  -1  24  20   -1.30    3.07
  -1  24  19    1.62    3.07
  -1 -24  18   -0.70    1.93
  -1  24  18   -0.78    2.16
  -1 -24  17    9.19    3.42
  -1  24  17    5.04    3.36
  -1 -24  16    0.01    2.71
  -1  24  16   -1.09    2.80
  -1 -24  15   -0.54    1.77
  -1  24  15    0.85    2.71
  -1 -24  14    5.13    2.32
  -1  24  14    3.91    2.92
  -1 -24  13    0.91    1.67
  -1  24  13    0.25    2.07
  -1 -24  12    0.52    2.13
  -1  24  12   -1.66    1.71
  -1 -24  11   -0.12    1.82
  -1  24  11   -1.83    1.60
  -1 -24  10   -1.08    1.76
  -1  24  10   -1.14    2.08
  -1 -24   9   11.68    2.55
  -1  24   9    9.27    2.55
  -1 -24   8    1.57    1.79
  -1  24   8    2.22    1.97
  -1 -24   7   16.52    2.61
  -1  24   7   17.17    3.35
  -1 -24   6    1.61    1.54
  -1  24   6    0.65    1.94
  -1 -24   5    4.55    1.68
  -1  24   5    6.20    1.97
  -1  24   4    2.89    1.60
   1  24  -4    4.43    1.64
  -1  24   3    8.97    2.32
   1  24  -3    7.38    1.83
  -1  24   2   11.34    2.14
   1  24  -2   11.27    2.05
  -1  24   1   16.37    2.62
   1  24  -1   13.18    2.20
  -1  24   0    4.62    1.61
   1  24   0    4.32    1.68
  -1  24  -1    6.16    2.06
   1  24   1    4.05    1.74
  -1  24  -2    5.34    2.11
   1  24   2    2.22    1.76
  -1  24  -3   53.13    4.30
   1  24   3   50.28    4.05
  -1  24  -4    9.78    2.53
   1  24   4    8.36    2.26
  -1  24  -5   57.82    4.64
   1  24   5   71.71    5.03
   1 -24   6   -1.83    1.61
   1  24   6   -0.58    1.84
   1 -24   7    5.39    1.88
   1  24   7    8.74    2.59
   1 -24   8    2.05    2.07
   1  24   8    1.87    2.25
   1 -24   9    0.13    1.45
   1  24   9    2.59    2.42
   1 -24  10    3.24    1.86
   1  24  10    4.84    2.14
   1 -24  11    9.88    2.61
   1  24  11    7.87    2.90
   1 -24  12   -0.01    2.34
   1  24  12    0.36    1.81
   1 -24  13    2.18    1.93
   1  24  13    3.49    2.71
   1 -24  14    0.71    1.99
   1  24  14   13.49    3.67
   1  24  15    3.23    2.91
   1 -24  16    2.32    2.40
   1  24  16    2.24    2.98
   1 -24  17    2.87    3.36
   1  24  17    3.97    2.75
   1 -24  18    0.33    3.24
   1 -24  19    0.89    2.38
   1  24  19    4.67    3.51
   1 -24  20   -1.73    2.92
   1  24  20    1.25    3.35
  -1  25  21    2.51    3.59
  -1  25  20    2.22    2.89
  -1  25  19    2.64    2.68
  -1  25  18    3.20    3.38
  -1 -25  17    2.89    2.17
  -1  25  17    3.96    3.38
  -1 -25  16    0.51    2.61
  -1  25  16   -0.40    2.14
  -1 -25  15   14.32    3.64
  -1  25  15   14.61    3.48
  -1 -25  14    3.37    2.70
  -1  25  14    5.87    3.26
  -1 -25  13   31.62    4.18
  -1  25  13   33.32    4.71
  -1 -25  12    0.73    2.18
  -1  25  12    0.09    2.68
  -1 -25  11   24.64    3.59
  -1  25  11   30.53    4.25
  -1 -25  10    2.59    2.10
  -1  25  10    3.96    2.20
  -1 -25   9    7.24    2.34
  -1  25   9    8.57    2.59
  -1 -25   8    6.80    2.15
  -1  25   8    6.36    2.32
  -1 -25   7   57.76    4.23
  -1  25   7   73.32    5.76
  -1 -25   6   -0.24    1.48
  -1  25   6    1.86    2.21
  -1 -25   5   17.45    2.56
  -1  25   5   18.93    3.19
  -1  25   4    0.27    1.88
   1  25  -4    0.07    1.33
  -1  25   3   37.66    3.91
   1  25  -3   32.10    3.11
  -1  25   2    0.00    1.19
   1  25  -2   -0.25    1.36
  -1  25   1   26.54    3.03
   1  25  -1   23.92    2.76
  -1  25   0    2.38    1.94
   1  25   0    2.37    1.65
  -1  25  -1  100.48    5.75
   1  25   1  101.13    5.30
  -1  25  -2   48.25    4.18
   1  25   2   49.57    4.03
  -1  25  -3   58.88    4.59
   1  25   3   57.84    4.47
  -1  25  -4   43.26    4.11
   1  25   4   43.67    3.98
  -1  25  -5   24.08    3.33
   1  25   5   24.81    3.29
   1 -25   6    7.50    2.02
   1  25   6    7.95    2.11
   1 -25   7   30.85    3.79
   1  25   7   35.53    3.86
   1 -25   8   26.03    3.65
   1  25   8   26.57    3.83
   1 -25   9   17.34    3.19
   1  25   9   20.88    3.71
   1 -25  10    1.84    2.26
   1  25  10    2.08    1.89
   1 -25  11   -0.91    2.22
   1  25  11   -0.21    1.83
   1 -25  12   19.20    3.40
   1  25  12   23.17    3.79
   1 -25  13    8.19    3.01
   1  25  13   10.42    3.34
   1 -25  14   17.65    3.84
   1  25  14   24.95    4.45
   1 -25  15    7.71    3.39
   1  25  15   13.78    3.96
   1 -25  16    7.26    3.49
   1  25  16   10.98    3.66
   1 -25  17   11.87    4.05
   1  25  17    9.16    3.16
   1 -25  18    8.23    3.21
   1  25  18    8.07    3.76
   1 -25  19    1.19    3.37
   1  25  19    4.14    2.73
   1 -25  20    0.31    2.26
   1  25  20   -1.01    2.28
  -1  26  20    0.97    3.15
  -1  26  19   -0.56    2.96
  -1  26  18    5.43    2.91
  -1  26  17   -0.05    2.20
  -1  26  16    4.22    2.78
  -1  26  15    5.59    2.71
  -1 -26  14    0.71    1.72
  -1  26  14    4.33    2.53
  -1 -26  13    0.89    1.76
  -1  26  13    2.60    2.91
  -1 -26  12    3.36    2.59
  -1  26  12    3.90    3.05
  -1 -26  11    0.38    1.45
  -1  26  11    0.26    2.59
  -1 -26  10   -2.16    1.79
  -1  26  10   -1.11    1.66
  -1 -26   9    1.34    1.48
  -1  26   9    3.02    2.63
  -1 -26   8    7.04    2.21
  -1  26   8    9.57    2.63
  -1 -26   7    5.38    1.95
  -1  26   7    1.69    2.22
  -1 -26   6   -1.42    1.45
  -1  26   6    0.01    1.45
  -1 -26   5    2.72    1.64
  -1  26   5    0.81    2.01
  -1  26   4   16.87    2.83
   1  26  -4   15.45    2.40
  -1  26   3    0.12    1.32
   1  26  -3    0.12    1.39
  -1  26   2   16.15    2.86
   1  26  -2   15.96    2.38
  -1  26   1   -0.04    1.24
   1  26  -1   -0.22    1.40
  -1  26   0    5.38    2.07
   1  26   0    3.90    1.72
  -1  26  -1    5.91    2.15
   1  26   1    4.15    1.75
  -1  26  -2    4.99    2.11
   1  26   2    3.03    1.80
  -1  26  -3    7.00    2.27
   1  26   3    3.54    1.94
  -1  26  -4    6.20    2.25
   1  26   4    3.98    1.95
  -1  26  -5    0.35    1.85
   1  26   5   -0.59    1.64
   1 -26   6   -0.66    1.78
   1  26   6    0.54    1.86
   1 -26   7    6.87    2.49
   1  26   7    4.39    2.39
   1 -26   8    1.40    1.55
   1  26   8   -0.36    2.03
   1 -26   9   11.35    2.88
   1  26   9   11.37    3.13
   1 -26  10   -0.02    2.09
   1  26  10    0.07    1.76
   1 -26  11   -0.16    1.56
   1  26  11   -1.28    1.70
   1 -26  12    3.18    2.65
   1  26  12    1.61    2.06
   1 -26  13   -0.83    1.63
   1  26  13    1.51    2.72
   1 -26  14    2.33    2.13
   1  26  14    6.61    3.24
   1 -26  15    0.51    2.63
   1  26  15    1.13    2.08
   1 -26  16    1.19    2.36
   1  26  16    1.77    2.95
   1 -26  17   -0.97    2.10
   1  26  17    0.05    2.88
   1 -26  18    2.92    3.58
   1  26  18    2.85    2.64
   1 -26  19   -1.63    2.29
   1  26  19    2.95    2.82
  -1  27  20    2.38    2.71
  -1  27  19    1.66    3.24
  -1  27  18    9.88    3.57
  -1  27  17    0.99    3.29
  -1  27  16   -1.78    2.76
  -1  27  15    3.56    3.24
  -1  27  14   22.10    4.14
  -1  27  13    0.91    2.90
  -1  27  12   34.05    5.09
  -1 -27  11    3.64    2.18
  -1  27  11    6.67    3.20
  -1 -27  10    7.97    2.66
  -1  27  10   11.01    3.01
  -1 -27   9    0.05    1.87
  -1  27   9   -0.06    2.43
  -1 -27   8   37.23    3.83
  -1  27   8   39.11    4.73
  -1 -27   7    1.56    1.83
  -1  27   7    3.52    2.04
  -1 -27   6   18.25    2.77
  -1  27   6   20.01    3.21
  -1 -27   5   12.82    2.36
  -1  27   5   13.01    2.71
  -1  27   4   34.61    4.02
   1  27  -4   38.09    3.47
  -1  27   3   20.76    3.27
   1  27  -3   15.87    2.48
  -1  27   2   16.49    2.92
   1  27  -2   18.53    2.59
  -1  27   1    1.86    1.47
   1  27  -1    2.50    1.65
  -1  27   0   30.84    3.52
   1  27   0   33.08    3.31
  -1  27  -1    3.63    1.61
   1  27   1    8.20    2.43
  -1  27  -2   91.83    5.63
   1  27   2   99.84    5.64
  -1  27  -3    3.82    1.72
   1  27   3    3.19    1.91
  -1  27  -4   62.16    4.87
   1  27   4   73.23    5.21
  -1  27  -5    2.10    1.94
   1  27   5    2.05    1.96
   1 -27   6   47.68    4.49
   1  27   6   57.74    5.01
   1 -27   7   -0.82    1.87
   1  27   7    0.51    2.26
   1 -27   8   50.23    4.70
   1  27   8   43.34    4.57
   1 -27   9   -0.13    1.38
   1  27   9   -1.88    1.51
   1 -27  10    3.22    1.82
   1  27  10    4.92    2.73
   1 -27  11   -0.09    2.14
   1  27  11    0.25    1.90
   1 -27  12    9.31    3.02
   1  27  12   11.44    3.05
   1 -27  13    4.64    2.72
   1  27  13    0.84    2.67
   1 -27  14   15.28    3.69
   1  27  14   13.00    3.28
   1 -27  15    1.25    2.12
   1  27  15    2.55    2.30
   1 -27  16    6.38    3.72
   1  27  16    6.54    2.88
   1 -27  17    1.29    3.10
   1  27  17    1.65    3.22
   1 -27  18    6.33    3.80
   1  27  18   10.12    3.43
   1 -27  19   -3.45    1.90
   1  27  19    0.19    3.14
  -1  28  19   -0.20    2.59
  -1  28  18    2.85    3.51
  -1  28  17    3.39    2.72
  -1  28  16    4.36    2.86
  -1  28  15    0.04    3.05
  -1  28  14    7.32    3.59
  -1  28  13    6.15    3.51
  -1  28  11    2.25    2.95
  -1  28  10    8.92    3.38
  -1  28   9    3.66    2.83
  -1  28   8    0.23    2.45
  -1  28   7    7.00    2.79
  -1 -28   6    4.18    1.81
  -1  28   6    7.52    2.83
  -1 -28   5    1.50    1.54
  -1  28   5   -0.54    2.26
  -1  28   4   -0.60    1.46
  -1  28   3   -0.03    1.89
  -1  28   2    0.46    1.77
   1  28  -2   -0.30    1.37
  -1  28   1    8.39    2.04
   1  28  -1    9.39    2.31
  -1  28   0    0.43    1.69
  -1  28  -1    2.39    1.85
   1  28   1    2.72    1.76
  -1  28  -2    4.27    2.02
   1  28   2    3.29    1.80
  -1  28  -3    1.63    1.95
   1  28   3   -0.09    1.67
  -1  28  -4    4.29    2.22
   1  28   4    3.27    2.14
  -1  28  -5    1.42    2.04
   1  28   5   -0.16    1.96
   1 -28   6    2.67    2.18
   1  28   6   -0.75    1.99
   1 -28   7   -0.36    1.91
   1  28   7    2.84    2.36
   1 -28   8    7.30    2.49
   1  28   8    3.98    2.12
   1 -28   9    1.05    2.10
   1  28   9    1.60    1.93
   1 -28  10   -0.85    2.02
   1  28  10   -1.98    2.21
   1 -28  11    2.84    2.51
   1  28  11    2.17    2.21
   1 -28  12    2.84    2.05
   1  28  12   -1.13    1.87
   1 -28  13   -0.44    2.35
   1  28  13    0.48    2.90
   1 -28  14   -0.24    2.58
   1  28  14   -0.01    2.08
   1 -28  15   -2.17    2.51
   1  28  15    0.24    2.32
   1 -28  16   -0.34    2.82
   1  28  16    1.72    2.44
   1 -28  17   -1.81    2.97
   1  28  17    1.17    2.38
   1 -28  18    1.08    2.49
   1  28  18   -3.34    2.73
   1  28  19   -0.08    2.23
  -1  29  19   -2.46    3.31
  -1  29  18    2.61    3.10
  -1  29  17    0.28    2.63
  -1  29  16   -0.64    2.60
  -1  29  15    1.80    2.73
  -1  29  14    3.90    3.43
  -1  29  13   22.73    4.35
  -1  29  12   13.63    3.55
  -1  29  11    9.20    3.06
  -1  29  10    8.47    3.41
  -1  29   9   31.93    4.36
  -1  29   8    0.20    1.83
  -1  29   7   42.71    4.94
  -1  29   6   12.69    2.94
  -1  29   5    5.22    2.27
  -1  29   4   53.61    5.09
  -1  29   3   22.37    3.26
  -1  29   2    9.65    2.30
  -1  29   1    5.54    1.88
  -1  29   0    0.71    1.91
  -1  29  -1   46.36    4.30
  -1  29  -2    1.35    1.96
   1  29   2    0.15    1.69
  -1  29  -3   45.99    4.39
   1  29   3   47.84    4.35
  -1  29  -4   14.53    2.60
   1  29   4   18.83    3.18
  -1  29  -5    4.35    2.24
   1  29   5    2.78    2.16
   1 -29   6   14.86    3.03
   1  29   6   19.52    3.42
   1 -29   7   23.62    3.53
   1  29   7   25.73    3.94
   1 -29   8    0.02    1.92
   1  29   8    0.19    1.77
   1 -29   9    1.65    2.23
   1  29   9    3.00    2.07
   1 -29  10    5.48    2.59
   1  29  10   12.32    3.40
   1 -29  11    5.00    2.67
   1  29  11    3.40    2.39
   1 -29  12    8.13    3.01
   1  29  12    6.32    2.80
   1 -29  13    2.34    2.04
   1  29  13   10.62    3.79
   1 -29  14    2.98    2.83
   1  29  14    2.49    2.41
   1 -29  15    0.04    2.71
   1  29  15    1.05    3.01
   1 -29  16   -1.13    2.02
   1  29  16   -2.51    2.74
   1 -29  17    4.01    2.66
   1  29  17    2.06    2.67
   1  29  18   -0.73    3.28
  -1  30  19    5.17    3.35
  -1  30  18   -0.83    3.46
  -1  30  17    5.29    4.00
  -1  30  16   -2.10    3.37
  -1  30  15    4.90    3.50
  -1  30  14    4.56    2.83
  -1  30  13   13.32    4.04
  -1  30  12    1.96    3.27
  -1  30  11   11.65    3.87
  -1  30  10    1.17    2.16
  -1  30   9    0.95    2.13
  -1  30   8    3.52    2.23
  -1  30   7    3.95    2.15
  -1  30   6    0.11    2.40
  -1  30   5    5.08    2.61
  -1  30   4    1.19    1.75
  -1  30   3    3.40    2.36
  -1  30   2   -0.12    1.99
  -1  30   1    2.12    1.61
  -1  30   0    2.10    2.08
  -1  30  -1    2.90    2.03
  -1  30  -2    3.20    2.17
  -1  30  -3   -0.40    1.92
  -1  30  -4    2.29    2.13
  -1  30  -5    0.84    1.56
   1 -30   6    3.58    2.19
   1 -30   7   -0.11    1.96
   1  30   7   -0.48    2.16
   1 -30   8    2.27    2.11
   1  30   8    9.48    2.91
   1 -30   9    1.68    2.35
   1  30   9    2.17    2.02
   1 -30  10    0.95    2.27
   1  30  10   -1.25    2.42
   1 -30  11    1.86    1.96
   1  30  11    1.07    2.16
   1 -30  12    3.26    2.86
   1  30  12    6.62    2.91
   1 -30  13    1.73    2.08
   1  30  13    2.94    3.37
   1 -30  14   -0.37    1.91
   1  30  14    0.57    2.87
   1 -30  15    0.80    1.96
   1  30  15   -1.14    3.11
   1  30  16   -1.38    2.98
   1  30  17    0.02    3.11
   1  30  18    0.31    2.48
  -1  31  18    3.90    3.90
  -1  31  17    7.24    3.49
  -1  31  16   -0.46    2.54
  -1  31  15    5.76    3.62
  -1  31  14    7.23    3.22
  -1  31  13   10.01    3.83
  -1  31  12   11.82    4.09
  -1  31  11   38.16    5.58
  -1  31  10   15.40    3.51
  -1  31   9   15.35    3.92
  -1  31   8   47.07    5.47
  -1  31   7    7.51    2.94
  -1  31   6    0.07    2.50
  -1  31   5   49.79    5.31
  -1  31   4    8.16    2.96
  -1  31   3   34.00    4.30
  -1  31   2   18.27    3.39
  -1  31   1    7.75    2.64
  -1  31   0    8.77    2.30
  -1  31  -1    7.68    2.18
  -1  31  -2   29.42    3.52
  -1  31  -3    8.69    2.65
  -1  31  -4    5.44    2.36
   1 -31   6    0.28    1.48
   1 -31   7    5.05    2.43
   1 -31   8   -1.01    1.92
   1 -31   9    5.57    2.67
   1 -31  10   -2.60    2.04
   1 -31  11   21.02    3.59
   1 -31  12    1.86    2.52
  -1  32  18    2.98    3.23
  -1  32  17    2.12    3.49
  -1  32  16   -1.40    2.41
  -1  32  15    4.72    3.02
  -1  32  14    3.70    3.57
  -1  32  13    4.63    2.89
  -1  32  12    9.42    3.31
  -1  32  11    1.07    2.87
  -1  32  10   -0.20    2.78
  -1  32   9   -1.66    2.45
  -1  32   8    2.31    2.82
  -1  32   7   -2.25    2.43
  -1  32   6   -0.12    1.83
  -1  32   5    1.36    2.54
  -1  32   4    5.42    2.68
  -1  32   3    6.07    2.16
  -1  32   2    1.84    2.26
  -1  32   1    3.83    2.33
  -1  32   0    0.17    1.48
  -1  32  -1   20.82    3.32
  -1  32  -2    2.60    2.10
  -1  32  -3    0.12    2.02
  -1  32  -4    0.04    1.47
   1 -32   6    9.49    2.82
   1 -32   7    0.42    2.10
   1 -32   8   -0.05    2.04
   1 -32   9   -0.67    1.95
  -1  33  17    1.82    3.91
  -1  33  16    9.37    4.33
  -1  33  15    0.69    3.32
  -1  33  14    6.99    3.22
  -1  33  13    3.30    2.81
  -1  33  12   19.93    4.38
  -1  33  11   -0.53    2.21
  -1  33  10   22.21    4.61
  -1  33   9    4.11    2.56
  -1  33   8    3.89    2.94
  -1  33   7   -1.47    1.72
  -1  33   6   15.49    3.70
  -1  33   5    1.68    2.61
  -1  33   4   53.42    5.22
  -1  33   3    8.57    2.93
  -1  33   2   23.21    3.70
  -1  33   1   -1.72    1.93
  -1  33   0    8.97    2.75
  -1  33  -1   -1.69    1.95
  -1  33  -2    6.01    2.52
   1 -33   5   -0.24    1.35
  -1  34  16    2.03    2.95
  -1  34  15   -1.25    3.29
  -1  34  14    7.58    3.40
  -1  34  13    5.90    3.54
  -1  34  12    1.39    3.21
  -1  34  11    0.89    3.15
  -1  34  10    1.83    2.42
  -1  34   9    1.92    2.91
  -1  34   8   -1.96    2.67
  -1  34   7    1.56    2.86
  -1  34   6    0.04    1.92
  -1  34   5    6.16    2.93
  -1  34   4    6.03    2.87
  -1  34   3    2.79    2.60
  -1  34   2    8.47    2.48
  -1  35  15    2.56    2.96
  -1  35  14    4.07    3.58
  -1  35  13    5.43    3.49
  -1  35  12    1.78    2.65
  -2   0  25   -1.39    2.17
  -2   0  24    1.14    3.26
  -2   0  23    1.04    3.01
  -2   0  22   35.48    5.38
  -2   0  21    2.78    2.97
  -2   0  20   20.17    4.09
  -2   0  19   -1.99    2.07
  -2   0  18   20.63    3.71
  -2   0  17    0.25    2.25
  -2   0  16   42.95    4.34
  -2   0  15    0.59    1.63
  -2   0  14   18.92    3.03
  -2   0  13   -1.16    1.11
  -2   0  12   44.72    3.81
  -2   0  11    1.61    1.55
  -2   0  10  155.11    6.01
  -2   0   9    0.46    0.87
  -2   0   8  221.93    6.32
  -2   0   7   -0.16    0.79
  -2   0   6  477.16    8.17
  -2   0   5   -1.53    0.57
  -2   0   4  349.66    5.75
  -2   0   3   -0.31    0.58
  -2   0   2  201.17    3.59
  -2   0   0   13.62    0.94
   2   0   1    0.83    0.51
   2   0   2   16.09    1.29
   2   0   3    0.24    0.73
   2   0   4    4.53    1.32
   2   0   5   -0.51    0.75
   2   0   6  179.79    5.72
   2   0   7   -0.42    1.02
   2   0   8  233.78    7.35
   2   0   9   -0.21    1.01
   2   0  10   76.97    4.68
   2   0  11   -0.59    1.32
   2   0  12    9.48    2.15
   2   0  13   -0.92    1.28
   2   0  14   37.48    3.99
   2   0  15    1.49    2.38
   2   0  16   85.84    6.40
   2   0  17    0.51    1.93
   2   0  18   20.81    3.99
   2   0  19    0.48    2.02
   2   0  20   23.98    4.62
   2   0  21   -2.11    1.95
   2   0  22    9.07    3.43
   2   0  23   -0.90    2.20
  -2  -1  25    0.25    2.34
  -2   1  25    0.84    2.35
  -2  -1  24    2.57    3.42
  -2   1  24    4.52    3.29
  -2  -1  23    2.04    3.07
  -2   1  23    1.81    3.06
  -2  -1  22    3.14    2.39
  -2   1  22    2.98    3.11
  -2  -1  21    3.18    2.49
  -2   1  21    6.31    3.36
  -2  -1  20    5.77    2.61
  -2   1  20    8.42    3.20
  -2  -1  19    4.08    2.23
  -2   1  19    4.74    2.73
  -2  -1  18    4.18    2.12
  -2   1  18    4.21    2.14
  -2  -1  17   10.39    2.61
  -2   1  17    8.88    2.53
  -2  -1  16    9.30    2.49
  -2   1  16    7.61    2.95
  -2  -1  15   19.11    3.37
  -2   1  15   18.68    3.04
  -2  -1  14    9.53    2.51
  -2   1  14   10.55    2.27
  -2  -1  13    5.16    1.73
  -2   1  13    3.72    1.60
  -2  -1  12   34.29    3.43
  -2   1  12   27.93    2.99
  -2  -1  11   18.89    2.39
  -2   1  11   21.28    2.75
  -2  -1  10   80.74    4.34
  -2   1  10   80.65    4.33
  -2  -1   9    2.44    1.11
  -2   1   9    1.22    1.34
  -2  -1   8   73.83    3.63
  -2   1   8   76.88    3.83
  -2  -1   7   16.75    1.71
  -2   1   7   16.31    1.95
  -2  -1   6    0.20    0.73
  -2   1   6    0.96    0.83
  -2  -1   5   79.45    2.91
  -2   1   5   76.74    3.09
  -2  -1   4   30.74    1.78
  -2   1   4   30.91    1.89
  -2  -1   3    4.85    0.74
  -2   1   3    4.67    0.76
  -2   1   2   29.15    1.47
  -2   1   1   11.05    0.92
  -2   1   0   70.57    2.31
   2  -1   1   11.40    1.08
   2   1   1   11.25    0.90
   2  -1   2    3.25    0.81
   2   1   2    2.17    0.82
   2  -1   3  444.10    7.50
   2   1   3  413.47    6.80
   2  -1   4  739.75   10.63
   2   1   4  742.76   10.27
   2  -1   5   28.09    2.18
   2   1   5   26.99    2.26
   2  -1   6  202.50    6.06
   2   1   6  217.07    6.23
   2  -1   7  177.84    6.15
   2   1   7  162.60    5.68
   2  -1   8   72.75    4.16
   2   1   8   75.31    4.24
   2  -1   9   32.72    3.25
   2   1   9   30.88    3.08
   2  -1  10   11.34    2.13
   2   1  10   13.65    2.61
   2  -1  11   36.53    3.53
   2   1  11   32.27    3.51
   2  -1  12    3.30    1.73
   2   1  12    2.00    1.53
   2  -1  13    0.53    1.43
   2   1  13   -0.08    1.52
   2  -1  14    5.54    2.03
   2   1  14    5.33    2.45
   2  -1  15    4.62    2.09
   2   1  15    1.96    1.81
   2  -1  16    3.04    2.14
   2   1  16   -1.26    1.73
   2  -1  17    3.51    2.69
   2   1  17   -0.62    1.75
   2  -1  18    1.53    2.03
   2   1  18    0.50    1.89
   2  -1  19    2.21    2.27
   2   1  19    1.47    2.10
   2  -1  20    0.73    2.84
   2   1  20    1.57    2.33
   2  -1  21    4.87    2.89
   2   1  21    2.63    3.25
   2  -1  22    4.12    3.54
   2   1  22    6.64    3.23
   2  -1  23    0.48    2.45
   2   1  23    1.02    3.27
  -2  -2  25   -0.15    2.49
  -2   2  25   -0.76    2.89
  -2  -2  24   -1.69    2.79
  -2   2  24    0.61    3.01
  -2  -2  23    4.04    3.14
  -2   2  23    5.64    3.37
  -2  -2  22    0.12    2.05
  -2   2  22   -0.90    2.66
  -2  -2  21   36.74    4.95
  -2   2  21   41.26    5.50
  -2  -2  20    3.20    2.33
  -2   2  20    3.61    2.38
  -2  -2  19    2.96    2.11
  -2   2  19    2.76    2.14
  -2  -2  18    3.19    1.93
  -2   2  18    4.06    2.21
  -2  -2  17   16.85    3.09
  -2   2  17   26.19    4.02
  -2  -2  16   20.67    3.26
  -2   2  16   26.74    3.73
  -2  -2  15   35.20    3.81
  -2   2  15   36.34    4.18
  -2  -2  14    3.50    1.71
  -2   2  14    3.03    1.71
  -2  -2  13    0.16    1.28
  -2   2  13   -0.44    1.15
  -2  -2  12   17.57    2.70
  -2   2  12   15.38    2.45
  -2  -2  11  185.17    6.88
  -2   2  11  180.11    6.86
  -2  -2  10  175.41    6.40
  -2   2  10  171.31    6.43
  -2  -2   9  103.70    4.60
  -2   2   9   94.92    4.51
  -2  -2   8   13.40    1.73
  -2   2   8   17.03    1.98
  -2  -2   7  354.50    7.42
  -2   2   7  362.42    7.93
  -2  -2   6  168.09    4.69
  -2   2   6  165.49    4.87
  -2  -2   5  329.44    5.93
  -2   2   5  330.74    6.51
  -2  -2   4  276.26    4.77
  -2   2   4  273.00    5.55
  -2  -2   3    0.93    0.50
  -2   2   3    1.63    0.64
  -2   2   2    3.92    0.69
  -2   2   1    8.31    1.00
  -2   2   0   99.20    2.95
  -2   2  -1  242.10    4.85
   2   2   1  226.58    3.83
   2  -2   2    5.81    1.00
   2   2   2    7.14    0.97
   2  -2   3  161.88    4.54
   2   2   3  158.81    4.02
   2  -2   4  124.80    4.34
   2   2   4  137.82    4.17
   2  -2   5   86.93    3.87
   2   2   5   87.53    3.62
   2  -2   6  166.21    5.53
   2   2   6  158.54    5.26
   2  -2   7  278.64    7.67
   2   2   7  265.92    7.26
   2  -2   8    8.87    1.86
   2   2   8    9.70    2.02
   2  -2   9  197.68    7.17
   2  -2  10    6.59    1.79
   2   2  10    6.01    1.85
   2  -2  11   16.76    2.57
   2   2  11   15.53    2.80
   2  -2  12   13.77    2.48
   2   2  12   13.67    2.45
   2  -2  13    0.27    1.97
   2   2  13   -0.04    1.39
   2  -2  14   22.74    3.65
   2   2  14   16.01    2.82
   2  -2  15   71.12    5.81
   2   2  15   55.26    4.95
   2  -2  16    6.76    2.48
   2   2  16    6.26    2.39
   2  -2  17   34.10    4.42
   2   2  17   28.23    4.08
   2  -2  18    1.97    2.13
   2   2  18    4.29    2.42
   2  -2  19   17.56    4.02
   2   2  19   22.66    4.29
   2  -2  20    2.67    2.44
   2   2  20    4.05    2.47
   2  -2  21    8.72    3.26
   2   2  21    9.08    3.71
   2  -2  22   -0.63    3.13
   2   2  22   -0.71    2.10
   2  -2  23    1.70    2.51
   2   2  23    1.80    3.40
  -2  -3  25    3.02    2.81
  -2   3  25    3.49    2.82
  -2  -3  24   -1.98    2.71
  -2   3  24    0.64    2.90
  -2  -3  23    1.34    2.91
  -2   3  23    1.05    2.11
  -2  -3  22   -0.13    2.02
  -2   3  22    1.61    2.25
  -2  -3  21    9.55    3.07
  -2   3  21   11.17    3.26
  -2  -3  20   -0.26    1.90
  -2   3  20    2.15    2.23
  -2  -3  19    4.76    2.68
  -2   3  19    4.99    2.88
  -2  -3  18    5.03    2.78
  -2   3  18    6.07    2.78
  -2  -3  17    8.73    2.97
  -2   3  17    9.72    2.66
  -2  -3  16   19.10    3.12
  -2   3  16   18.35    3.52
  -2  -3  15   28.80    3.52
  -2   3  15   27.96    3.57
  -2  -3  14    0.04    1.40
  -2   3  14    0.38    1.50
  -2  -3  13    0.70    1.30
  -2   3  13    0.12    1.20
  -2  -3  12  121.43    5.91
  -2   3  12  129.03    6.19
  -2  -3  11   13.17    2.31
  -2   3  11    9.39    2.01
  -2  -3  10   37.17    2.97
  -2   3  10   39.13    3.25
  -2  -3   9   31.47    2.67
  -2   3   9   27.43    2.63
  -2  -3   8   58.44    3.16
  -2   3   8   61.56    3.53
  -2  -3   7   87.09    3.56
  -2   3   7   84.43    3.81
  -2  -3   6   15.05    1.58
  -2   3   6   12.27    1.56
  -2  -3   5  476.61    7.17
  -2   3   5  479.37    8.14
  -2  -3   4   17.22    1.30
  -2   3   4   17.52    1.73
  -2  -3   3   43.00    1.51
  -2   3   3   41.76    2.08
  -2   3   2    0.22    0.72
  -2   3   1   30.74    1.78
  -2   3   0   18.84    1.43
  -2   3  -1    1.62    0.95
   2   3   1    0.46    0.45
   2  -3   2  927.52   11.51
   2   3   2  896.81    9.60
   2  -3   3  129.23    4.22
   2   3   3  125.80    3.53
   2  -3   4  112.99    4.16
   2   3   4  122.40    3.91
   2  -3   5  362.94    8.06
   2   3   5  363.71    7.35
   2  -3   6   78.00    3.90
   2   3   6   86.28    3.87
   2  -3   7  200.34    6.54
   2   3   7  203.09    6.33
   2  -3   8   70.26    4.29
   2   3   8   69.33    4.06
   2  -3   9  110.47    5.49
   2  -3  10   22.33    3.00
   2   3  10   20.16    2.85
   2  -3  11   69.50    4.78
   2   3  11   65.71    4.49
   2  -3  12   22.89    3.28
   2   3  12   20.75    3.11
   2  -3  13   -0.88    1.39
   2   3  13    0.01    1.41
   2  -3  14   37.88    4.16
   2   3  14   28.15    3.47
   2  -3  15    3.63    2.13
   2   3  15    4.12    2.63
   2  -3  16    0.19    1.72
   2   3  16   -0.80    1.68
   2  -3  17    3.03    2.10
   2   3  17    3.20    2.18
   2  -3  18    2.30    2.68
   2   3  18    3.72    2.84
   2  -3  19    0.88    1.99
   2   3  19    0.93    2.11
   2  -3  20   -0.90    1.97
   2   3  20    5.04    3.15
   2  -3  21    5.06    2.99
   2   3  21    5.98    2.82
   2  -3  22    0.80    3.34
   2   3  22    4.20    2.76
   2  -3  23    0.33    2.43
   2   3  23    0.83    3.25
  -2  -4  25    2.00    2.81
  -2   4  25    2.64    2.83
  -2  -4  24   -2.25    2.52
  -2   4  24   -2.09    2.00
  -2  -4  23   -0.15    2.77
  -2   4  23    0.31    1.99
  -2  -4  22   12.73    3.41
  -2   4  22   10.42    3.08
  -2  -4  21    4.48    2.59
  -2   4  21    4.46    2.49
  -2   4  20   13.77    3.66
  -2  -4  19    6.05    2.86
  -2   4  19    7.76    2.60
  -2  -4  18    4.09    2.06
  -2   4  18    5.24    2.27
  -2  -4  17   36.92    4.25
  -2   4  17   41.25    4.78
  -2  -4  16    8.76    2.42
  -2   4  16   16.50    3.13
  -2  -4  15    2.49    2.26
  -2   4  15    2.33    2.01
  -2  -4  14    0.30    1.87
  -2   4  14    2.73    1.82
  -2  -4  13    0.09    1.66
  -2   4  13    2.77    1.59
  -2  -4  12   56.47    4.15
  -2   4  12   61.37    4.45
  -2  -4  11  217.46    7.38
  -2   4  11  219.00    7.87
  -2  -4  10   41.53    3.29
  -2   4  10   42.89    3.62
  -2  -4   9   70.79    3.84
  -2   4   9   81.18    4.30
  -2  -4   8   57.19    3.16
  -2   4   8   55.74    3.36
  -2  -4   7   74.76    3.32
  -2   4   7   73.96    3.71
  -2  -4   6  202.18    5.00
  -2   4   6  178.65    5.33
  -2  -4   5  259.05    5.10
  -2   4   5  268.96    6.30
  -2  -4   4   68.15    2.26
  -2   4   4   66.67    2.99
  -2  -4   3  442.90    5.38
  -2   4   3  407.25    6.92
  -2   4   2    8.41    1.09
  -2   4   1  465.01    7.27
  -2   4   0  137.85    3.87
  -2   4  -1   10.82    1.29
   2   4   1   10.46    0.85
  -2   4  -2    4.94    1.07
   2   4   2    4.78    0.88
   2  -4   3  267.43    6.14
   2   4   3  276.22    5.33
   2  -4   4   91.58    3.85
   2   4   4  100.67    3.51
   2  -4   5  425.45    8.99
   2   4   5  426.55    7.99
   2  -4   6   23.76    2.36
   2   4   6   25.06    2.19
   2  -4   7  317.89    8.35
   2   4   7  312.86    7.79
   2  -4   8   60.62    3.92
   2   4   8   57.30    3.66
   2  -4   9   99.28    5.34
   2   4   9   89.29    4.68
   2  -4  10   69.35    4.81
   2   4  10   61.24    4.16
   2  -4  11   96.17    5.66
   2   4  11   79.06    4.89
   2  -4  12    7.45    2.05
   2   4  12    7.66    2.41
   2  -4  13   54.27    4.63
   2   4  13   49.66    4.28
   2  -4  14    2.24    1.90
   2   4  14    1.63    1.70
   2  -4  15   58.65    5.54
   2   4  15   48.40    4.78
   2  -4  16   13.45    3.59
   2   4  16    6.40    2.95
   2  -4  17    8.09    3.15
   2   4  17    3.99    2.20
   2  -4  18    4.37    2.44
   2   4  18    3.32    2.20
   2  -4  19   19.49    3.91
   2   4  19   14.29    3.74
   2  -4  20    5.21    2.68
   2   4  20    5.80    2.69
   2  -4  21    8.23    3.25
   2   4  21    8.05    3.08
   2  -4  22    1.18    3.31
   2   4  22    2.02    3.28
   2  -4  23   -0.80    2.29
   2   4  23   -0.33    2.27
  -2  -5  25    1.80    2.50
  -2   5  25    0.71    2.45
  -2  -5  24    1.54    2.50
  -2   5  24    0.90    2.35
  -2  -5  23   -3.02    2.52
  -2   5  23   -0.17    2.03
  -2  -5  22   -0.87    1.87
  -2   5  22    1.92    2.22
  -2  -5  21    3.13    2.25
  -2   5  21    2.54    2.89
  -2  -5  20   17.53    3.90
  -2   5  20   10.16    2.93
  -2  -5  19   -0.81    1.64
  -2   5  19   -0.72    1.62
  -2  -5  18    7.01    2.40
  -2   5  18    5.64    2.72
  -2  -5  17   18.23    3.57
  -2   5  17   16.70    3.17
  -2  -5  16   19.56    3.48
  -2   5  16   17.37    3.18
  -2  -5  15    0.93    1.55
  -2   5  15   -1.23    2.16
  -2  -5  14   52.37    4.27
  -2   5  14   52.90    4.74
  -2  -5  13   39.82    3.77
  -2   5  13   42.36    3.88
  -2  -5  12    4.24    1.92
  -2   5  12    4.60    1.73
  -2  -5  11  199.96    7.06
  -2   5  11  212.18    7.71
  -2  -5  10   22.16    2.39
  -2   5  10   24.28    2.69
  -2  -5   9   68.08    3.66
  -2   5   9   61.93    3.88
  -2  -5   8    3.76    1.29
  -2   5   8    1.38    1.31
  -2  -5   7   16.85    1.78
  -2   5   7   15.73    1.99
  -2  -5   6   28.31    2.03
  -2   5   6   27.81    2.28
  -2  -5   5    3.78    0.94
  -2   5   5    4.20    1.11
  -2  -5   4  119.86    3.04
  -2   5   4  114.49    3.90
  -2  -5   3    3.68    0.66
  -2   5   3    1.84    1.12
  -2   5   2  177.77    4.51
  -2   5   1   69.24    2.85
  -2   5   0  232.90    5.35
  -2   5  -1  429.91    7.51
   2   5   1  432.60    5.33
  -2   5  -2   13.51    1.52
   2   5   2   14.73    1.17
   2  -5   3   66.95    3.39
   2   5   3   69.54    2.64
   2  -5   4   47.69    2.94
   2   5   4   52.23    2.60
   2  -5   5    2.97    1.55
   2   5   5    5.84    1.37
   2  -5   6  261.48    7.51
   2   5   6  253.77    6.54
   2  -5   7    8.32    1.75
   2   5   7    7.66    1.51
   2  -5   8   33.62    3.00
   2   5   8   37.60    2.93
   2  -5   9   10.06    2.05
   2   5   9    6.19    1.87
   2  -5  10   20.96    3.05
   2   5  10   15.59    2.65
   2  -5  11    1.80    1.68
   2   5  11   -0.40    1.85
   2  -5  12   30.28    3.53
   2   5  12   27.18    3.37
   2  -5  13   16.87    3.20
   2   5  13   15.72    2.74
   2  -5  14   14.21    2.81
   2   5  14   14.44    2.85
   2  -5  15    3.80    2.28
   2   5  15    7.60    2.44
   2  -5  16    2.42    2.16
   2   5  16    0.54    1.80
   2  -5  17   11.91    3.08
   2   5  17    9.63    3.16
   2  -5  18    1.93    2.20
   2   5  18    5.65    2.92
   2  -5  19    3.43    2.50
   2   5  19    3.13    2.29
   2  -5  20    5.39    2.76
   2   5  20    4.04    2.54
   2  -5  21   -1.79    1.98
   2   5  21    0.18    2.84
   2  -5  22    1.77    3.25
   2   5  22    2.21    3.28
   2  -5  23    0.78    2.44
   2   5  23   -1.09    2.17
  -2  -6  25    1.93    3.21
  -2   6  25    0.81    2.41
  -2  -6  24   -1.60    2.15
  -2   6  24    2.14    2.57
  -2  -6  23    0.73    2.81
  -2   6  23    3.34    2.55
  -2  -6  22    1.66    2.12
  -2   6  22    2.29    2.89
  -2  -6  21    7.43    2.68
  -2   6  21    7.29    3.29
  -2  -6  20    6.80    3.04
  -2   6  20   11.34    3.06
  -2  -6  19    0.64    1.81
  -2   6  19    0.74    2.49
  -2  -6  18   21.85    3.87
  -2   6  18   25.42    3.81
  -2  -6  17    0.49    1.71
  -2   6  17    2.07    1.86
  -2  -6  16    9.63    2.41
  -2   6  16   10.69    3.06
  -2  -6  15   -1.00    1.85
  -2   6  15   -3.07    1.93
  -2  -6  14   16.51    2.64
  -2   6  14   20.20    3.32
  -2  -6  13    4.24    1.64
  -2   6  13    3.86    1.62
  -2  -6  12   43.80    3.74
  -2   6  12   39.76    3.61
  -2  -6  11   45.17    3.49
  -2   6  11   41.80    3.59
  -2  -6  10  216.40    7.03
  -2   6  10  202.50    7.16
  -2  -6   9   24.25    2.32
  -2   6   9   20.76    2.40
  -2  -6   8   17.61    2.01
  -2   6   8   16.16    2.24
  -2  -6   7    5.72    1.14
  -2   6   7    5.33    1.46
  -2  -6   6   96.78    3.45
  -2   6   6   97.99    4.25
  -2  -6   5    3.50    0.90
  -2   6   5    3.49    1.05
  -2  -6   4  230.81    4.31
  -2   6   4  217.10    5.60
  -2  -6   3   66.66    1.90
  -2   6   3   63.45    2.92
  -2   6   2  102.58    3.59
  -2   6   1   13.79    1.48
  -2   6   0  895.23   11.57
  -2   6  -1   19.87    1.79
   2   6   1   21.45    1.14
  -2   6  -2    2.01    0.94
   2   6   2    0.96    0.66
   2  -6   3   -1.88    1.06
   2   6   3   -0.51    0.68
   2  -6   4  430.19    8.83
   2   6   4  429.91    7.40
   2  -6   5    7.66    1.73
   2   6   5    9.25    1.48
   2  -6   6  360.95    9.02
   2   6   6  337.02    7.54
   2  -6   7    1.99    1.23
   2   6   7    1.84    1.37
   2  -6   8   41.69    3.51
   2   6   8   41.21    3.04
   2  -6   9    9.33    1.95
   2   6   9    9.49    2.02
   2  -6  10  142.88    6.77
   2   6  10  137.35    6.07
   2  -6  11    9.57    2.72
   2   6  11    6.62    1.99
   2  -6  12   84.99    5.62
   2   6  12   85.11    5.36
   2  -6  13    5.14    2.13
   2   6  13    4.68    1.83
   2  -6  14   49.75    4.77
   2   6  14   39.29    4.10
   2  -6  15    0.92    2.41
   2   6  15   -0.76    1.51
   2  -6  16   10.88    2.82
   2   6  16   10.93    2.73
   2  -6  17    0.10    1.92
   2   6  17   -1.87    1.53
   2  -6  18    6.44    2.66
   2   6  18    9.52    2.78
   2  -6  19    0.36    2.16
   2   6  19    4.39    2.37
   2  -6  20   18.46    3.90
   2   6  20   19.52    4.30
   2  -6  21    1.41    3.15
   2   6  21    1.83    2.92
   2  -6  22    4.55    3.58
   2   6  22    3.68    2.58
   2  -6  23   -4.53    2.99
   2   6  23   -0.14    2.39
  -2  -7  25   -2.97    2.98
  -2   7  25    2.61    2.80
  -2  -7  24    1.14    2.57
  -2   7  24   -2.65    1.91
  -2  -7  23    3.27    3.04
  -2   7  23    7.22    3.44
  -2  -7  22    0.19    1.99
  -2   7  22    1.85    2.85
  -2  -7  21    2.06    2.23
  -2   7  21   -1.16    1.81
  -2  -7  20    4.40    2.78
  -2   7  20    3.69    2.80
  -2  -7  19    7.15    2.54
  -2   7  19    4.24    2.35
  -2  -7  18    0.54    2.38
  -2   7  18    0.36    2.39
  -2  -7  17    1.50    1.82
  -2   7  17    0.27    1.73
  -2  -7  16    2.87    2.28
  -2   7  16    0.30    1.67
  -2  -7  15   29.33    3.49
  -2   7  15   27.49    3.60
  -2  -7  14    0.38    1.74
  -2   7  14   -0.86    1.40
  -2  -7  13    8.60    2.01
  -2   7  13    8.57    2.07
  -2  -7  12   40.05    3.58
  -2   7  12   35.82    3.45
  -2  -7  11    3.37    1.40
  -2   7  11    3.89    1.60
  -2  -7  10  192.20    6.71
  -2   7  10  163.23    6.63
  -2  -7   9   -0.51    1.25
  -2   7   9    1.60    1.64
  -2  -7   8   78.60    3.78
  -2   7   8   75.67    4.13
  -2  -7   7   15.28    1.72
  -2   7   7   13.98    2.05
  -2  -7   6   56.50    2.74
  -2   7   6   52.29    3.16
  -2  -7   5   96.22    3.19
  -2   7   5   93.51    3.98
  -2  -7   4   50.68    2.06
  -2   7   4   48.87    2.78
  -2  -7   3    0.23    0.55
  -2   7   3   -0.75    0.72
  -2   7   2   19.72    1.86
  -2   7   1  131.57    4.27
  -2   7   0  279.64    6.29
  -2   7  -1   37.29    2.40
   2   7   1   35.65    1.50
  -2   7  -2    7.40    1.48
   2   7   2    7.83    0.98
   2  -7   3    0.47    0.90
   2   7   3    0.31    0.72
   2  -7   4   91.35    4.13
   2   7   4   94.24    3.52
   2  -7   5    0.92    1.08
   2   7   5   -0.07    0.81
   2  -7   6   19.25    2.32
   2   7   6   20.92    2.25
   2  -7   7   21.37    2.48
   2   7   7   21.15    2.21
   2  -7   8   32.65    3.24
   2   7   8   27.57    2.60
   2  -7   9    1.74    1.34
   2   7   9   -0.22    1.02
   2  -7  10    1.02    1.65
   2   7  10    0.69    1.34
   2  -7  11   30.48    3.55
   2   7  11   29.06    3.44
   2  -7  12    6.15    2.20
   2   7  12    4.60    1.80
   2  -7  13    9.93    2.92
   2   7  13   13.02    2.49
   2  -7  14    9.03    2.51
   2   7  14    5.09    2.03
   2  -7  15   11.80    2.79
   2   7  15   11.83    3.05
   2  -7  16    2.01    2.66
   2   7  16    1.25    2.35
   2  -7  17    3.14    2.23
   2   7  17    1.55    2.38
   2  -7  18    0.76    2.14
   2   7  18    3.84    2.78
   2  -7  19   -0.66    2.09
   2   7  19    1.41    2.16
   2  -7  20    3.02    2.62
   2   7  20    0.75    2.30
   2  -7  21    3.34    2.56
   2   7  21    3.36    2.55
   2  -7  22   -0.97    2.95
   2   7  22    0.26    2.24
   2  -7  23   -1.80    3.16
   2   7  23   -1.26    3.01
  -2  -8  25    3.44    3.38
  -2   8  25    3.95    2.96
  -2  -8  24   -0.06    2.17
  -2   8  24   -0.88    2.26
  -2  -8  23    3.31    3.08
  -2   8  23    2.69    3.14
  -2  -8  22    0.02    2.01
  -2   8  22    0.75    2.17
  -2  -8  21    4.82    2.46
  -2   8  21    5.24    2.60
  -2  -8  20    1.57    2.05
  -2   8  20   -1.43    1.79
  -2  -8  19    7.97    2.62
  -2   8  19    7.01    2.62
  -2  -8  18    5.70    2.74
  -2   8  18    4.33    2.26
  -2  -8  17    5.48    2.16
  -2   8  17    5.92    2.36
  -2  -8  16    5.34    2.01
  -2   8  16    5.22    2.15
  -2  -8  15    0.04    1.98
  -2   8  15    0.38    1.51
  -2  -8  14   42.83    3.96
  -2   8  14   36.90    3.93
  -2  -8  13   19.25    2.85
  -2   8  13   20.59    3.08
  -2  -8  12   12.12    2.38
  -2   8  12   10.50    2.39
  -2  -8  11  141.21    6.04
  -2   8  11  147.53    6.72
  -2  -8  10   12.49    2.01
  -2   8  10   12.57    2.18
  -2  -8   9   37.93    2.88
  -2   8   9   36.30    3.17
  -2  -8   8   93.42    4.18
  -2   8   8  103.09    5.00
  -2  -8   7   21.98    1.92
  -2   8   7   21.94    2.34
  -2  -8   6   89.02    3.49
  -2   8   6   90.12    4.24
  -2  -8   5  301.67    5.75
  -2   8   5  279.28    7.09
  -2  -8   4   31.81    1.66
  -2   8   4   40.84    2.68
  -2  -8   3  501.08    6.31
  -2   8   3  512.55    9.10
  -2   8   2  115.43    4.11
  -2   8   1   64.59    3.21
  -2   8   0    0.12    0.78
  -2   8  -1  229.83    6.06
   2   8   1  258.01    4.40
  -2   8  -2   99.25    4.16
   2   8   2   99.29    2.95
  -2   8  -3  108.51    4.49
   2   8   3  115.10    3.56
   2  -8   4    0.26    0.95
   2   8   4    0.48    0.66
   2  -8   5  434.58    9.77
   2   8   5  462.07    8.56
   2  -8   6    8.00    1.68
   2   8   6    7.09    1.61
   2  -8   7  111.60    5.39
   2   8   7  112.12    4.81
   2  -8   8   15.12    2.53
   2   8   8   16.52    2.06
   2  -8   9   82.32    5.06
   2   8   9   72.50    4.28
   2  -8  10   54.23    4.30
   2   8  10   54.20    4.08
   2  -8  11  134.16    6.85
   2   8  11  123.63    6.09
   2  -8  12   19.78    3.17
   2   8  12   21.61    3.13
   2  -8  13   34.44    4.00
   2   8  13   34.48    3.64
   2  -8  14    9.01    3.07
   2   8  14    6.87    2.52
   2  -8  15   21.10    3.49
   2   8  15   20.20    3.47
   2  -8  16    1.29    2.06
   2   8  16    1.95    1.87
   2  -8  17    3.18    2.99
   2   8  17    2.56    2.00
   2  -8  18   -4.31    2.57
   2   8  18    0.36    1.93
   2  -8  19   19.83    3.97
   2   8  19   17.18    3.58
   2  -8  20   -0.49    2.14
   2   8  20   -0.52    1.89
   2  -8  21   12.81    3.56
   2   8  21   13.53    4.04
   2  -8  22    1.34    2.47
   2   8  22    1.16    3.09
   2  -8  23   -1.66    3.10
   2   8  23    0.77    3.28
  -2  -9  25    2.50    2.65
  -2   9  25    2.53    2.83
  -2  -9  24    2.98    3.17
  -2   9  24    2.56    3.28
  -2  -9  23    0.03    1.95
  -2   9  23    1.95    2.63
  -2  -9  22   11.34    3.64
  -2   9  22    8.53    3.16
  -2  -9  21    1.31    2.07
  -2   9  21    0.31    2.61
  -2  -9  20   -0.24    1.85
  -2   9  20    3.01    2.34
  -2  -9  19   16.17    3.60
  -2   9  19    7.11    2.62
  -2  -9  18    0.24    1.77
  -2   9  18    0.95    2.39
  -2  -9  17    0.57    2.20
  -2   9  17   -0.59    2.32
  -2  -9  16    0.30    1.46
  -2   9  16    2.12    2.34
  -2  -9  15    6.44    2.52
  -2   9  15    8.29    2.75
  -2  -9  14   13.86    2.89
  -2   9  14   11.89    2.65
  -2  -9  13    6.37    1.83
  -2   9  13    6.04    2.38
  -2  -9  12    0.27    1.16
  -2   9  12    0.08    1.82
  -2  -9  11   39.64    3.38
  -2   9  11   34.59    3.44
  -2  -9  10    2.99    1.27
  -2   9  10    2.33    1.78
  -2  -9   9  211.31    6.65
  -2   9   9  216.02    7.61
  -2  -9   8  137.02    5.07
  -2   9   8  145.82    6.16
  -2  -9   7   32.62    2.45
  -2   9   7   32.11    2.83
  -2  -9   6   45.98    2.57
  -2   9   6   45.53    3.23
  -2  -9   5   17.85    1.53
  -2   9   5   14.84    1.83
  -2  -9   4   57.11    2.31
  -2   9   4   54.85    3.22
  -2  -9   3    3.86    0.76
  -2   9   3    3.12    1.28
  -2   9   2   -0.04    1.05
  -2   9   1   26.41    2.15
  -2   9   0    3.12    1.07
   2   9   0    0.66    0.53
  -2   9  -1  334.93    7.58
   2   9   1  347.66    5.40
  -2   9  -2   -0.03    0.84
   2   9   2    0.63    0.69
  -2   9  -3    1.25    1.24
   2   9   3    0.61    0.83
   2  -9   4   -1.06    1.15
   2   9   4   -0.53    0.92
   2  -9   5    8.63    1.88
   2   9   5    6.21    1.44
   2  -9   6    4.93    1.77
   2   9   6    1.98    1.40
   2  -9   7   36.20    3.23
   2   9   7   35.02    2.77
   2  -9   8    0.12    1.51
   2   9   8    1.95    1.41
   2  -9   9    0.58    1.81
   2   9   9    0.33    1.12
   2  -9  10   29.91    3.35
   2   9  10   28.16    2.93
   2  -9  11   -0.80    2.18
   2   9  11    1.84    1.38
   2  -9  12   -1.34    1.43
   2   9  12    2.65    1.86
   2  -9  13    9.02    3.00
   2   9  13    6.50    1.98
   2  -9  14   62.38    5.45
   2   9  14   60.10    5.11
   2  -9  15    0.67    1.91
   2   9  15    1.01    1.75
   2  -9  16   -0.13    1.80
   2   9  16    0.49    1.77
   2  -9  17   -1.69    2.75
   2   9  17    1.13    1.80
   2  -9  18   -2.88    2.65
   2   9  18   -0.37    1.74
   2  -9  19    3.56    2.66
   2   9  19    1.32    2.17
   2  -9  20    0.86    2.37
   2   9  20   -0.41    2.73
   2  -9  21    0.91    2.47
   2   9  21   -0.77    2.79
   2  -9  22    0.94    2.44
   2   9  22    1.39    2.92
   2  -9  23   -1.34    2.33
   2   9  23    1.26    2.66
  -2 -10  24   -1.24    2.79
  -2  10  24    3.38    3.58
  -2 -10  23    5.48    2.82
  -2  10  23    5.34    3.06
  -2 -10  22    1.12    2.93
  -2  10  22    3.15    3.22
  -2 -10  21   10.89    3.11
  -2  10  21    6.20    2.83
  -2 -10  20   -1.10    2.48
  -2  10  20   -2.99    2.53
  -2 -10  19    5.11    2.84
  -2  10  19    5.48    2.54
  -2  10  18    3.10    2.20
  -2 -10  17   16.97    3.43
  -2  10  17   13.15    3.07
  -2 -10  16   -0.91    1.91
  -2  10  16    0.63    1.86
  -2 -10  15   23.20    3.22
  -2  10  15   20.30    3.29
  -2 -10  14   73.42    5.11
  -2  10  14   67.29    5.32
  -2 -10  13  127.02    6.38
  -2  10  13  125.52    6.99
  -2 -10  12   -0.57    1.11
  -2  10  12   -0.26    1.78
  -2 -10  11    0.80    1.17
  -2  10  11    0.16    1.20
  -2 -10  10   28.90    2.95
  -2  10  10   23.71    2.86
  -2 -10   9   37.43    2.93
  -2  10   9   39.50    3.53
  -2 -10   8    0.89    0.99
  -2  10   8    0.89    1.22
  -2 -10   7  213.04    5.89
  -2  10   7  215.64    7.18
  -2 -10   6   14.25    1.60
  -2  10   6   14.67    1.97
  -2 -10   5  229.52    5.19
  -2  10   5  232.36    6.86
  -2 -10   4   68.36    2.58
  -2  10   4   71.37    3.67
  -2 -10   3  184.81    3.83
  -2  10   3  172.50    5.56
  -2  10   2    5.65    1.24
   2  10  -2    5.22    0.80
  -2  10   1  162.84    5.34
   2  10  -1  159.92    3.26
  -2  10   0   37.07    2.58
   2  10   0   38.28    1.69
  -2  10  -1    1.74    1.27
   2  10   1    0.95    0.61
  -2  10  -2    0.87    1.16
   2  10   2    2.06    0.83
  -2  10  -3  229.16    6.78
   2  10   3  241.83    5.48
   2 -10   4  172.25    6.06
   2  10   4  175.51    5.01
   2 -10   5   26.96    2.57
   2  10   5   22.45    2.18
   2 -10   6  256.03    7.95
   2  10   6  264.79    7.16
   2 -10   7  156.34    6.47
   2  10   7  150.80    5.66
   2 -10   8   32.51    3.25
   2  10   8   29.25    2.83
   2 -10   9  151.49    6.93
   2  10   9  145.26    6.10
   2 -10  10   11.39    2.35
   2  10  10   12.06    2.10
   2 -10  11   36.85    3.84
   2  10  11   28.67    3.17
   2 -10  12    5.84    2.05
   2  10  12    5.54    1.85
   2 -10  13   24.58    3.61
   2  10  13   23.89    3.15
   2 -10  14   17.82    3.29
   2  10  14   19.11    3.28
   2 -10  15   13.42    3.53
   2  10  15   15.21    2.97
   2 -10  16    4.69    2.43
   2  10  16    6.56    2.33
   2 -10  17   17.89    3.99
   2  10  17   11.54    3.31
   2 -10  18   -0.62    2.99
   2  10  18   -0.54    2.38
   2 -10  19    0.08    2.43
   2  10  19   -0.89    1.82
   2 -10  20   10.41    3.36
   2  10  20   10.43    3.19
   2 -10  21    2.24    2.69
   2  10  21    6.13    2.95
   2 -10  22    0.64    2.52
   2  10  22   -1.37    2.31
   2 -10  23    9.29    3.50
   2  10  23    9.21    3.34
  -2 -11  24    1.90    2.43
  -2  11  24    3.89    2.95
  -2 -11  23   15.34    4.24
  -2  11  23   15.29    4.00
  -2 -11  22    2.58    3.02
  -2  11  22    2.05    3.13
  -2 -11  21    4.03    2.39
  -2  11  21    3.08    2.46
  -2 -11  20    5.27    3.01
  -2  11  20    5.57    2.73
  -2 -11  19    1.15    2.44
  -2  11  19   -1.79    2.40
  -2 -11  18   10.14    2.73
  -2  11  18   10.47    3.38
  -2 -11  17   15.16    3.36
  -2  11  17   15.81    3.65
  -2 -11  16   14.62    3.11
  -2  11  16   11.22    2.83
  -2 -11  15    2.73    2.17
  -2  11  15    1.43    1.83
  -2 -11  14   16.03    3.12
  -2  11  14   19.99    3.51
  -2 -11  13    7.49    2.44
  -2  11  13    5.62    2.40
  -2 -11  12    2.92    1.83
  -2  11  12    1.42    2.03
  -2 -11  11   -0.06    1.05
  -2  11  11   -0.48    1.28
  -2 -11  10   35.58    3.24
  -2  11  10   34.94    3.51
  -2 -11   9   50.18    3.52
  -2  11   9   48.12    3.85
  -2 -11   8   95.54    4.38
  -2  11   8   82.33    4.73
  -2 -11   7    5.39    1.40
  -2  11   7    5.93    1.60
  -2 -11   6   40.15    2.51
  -2  11   6   36.51    3.00
  -2 -11   5   37.83    2.28
  -2  11   5   39.28    3.08
  -2 -11   4   19.41    1.58
  -2  11   4   19.06    2.07
  -2 -11   3    6.13    0.99
  -2  11   3    5.50    1.29
  -2  11   2    1.92    1.22
   2  11  -2    0.98    0.66
  -2  11   1  238.93    6.62
   2  11  -1  234.67    4.29
  -2  11   0   76.96    3.73
   2  11   0   86.06    2.64
  -2  11  -1    8.28    1.46
   2  11   1    9.42    1.15
  -2  11  -2   10.53    1.80
   2  11   2   11.08    1.36
  -2  11  -3    5.43    1.39
   2  11   3    4.25    1.14
   2 -11   4   -0.17    0.99
   2 -11   5    3.56    1.33
   2  11   5    1.29    0.90
   2 -11   6    5.61    1.66
   2  11   6    6.36    1.46
   2 -11   7   16.38    2.56
   2 -11   8    1.49    1.31
   2  11   8    2.58    1.34
   2 -11   9    0.86    1.99
   2  11   9    2.11    1.38
   2 -11  10   -0.07    1.39
   2  11  10    1.67    1.71
   2 -11  11   24.32    3.26
   2  11  11   21.50    2.80
   2 -11  12   -1.03    1.54
   2  11  12   -0.31    1.21
   2 -11  13   37.35    4.30
   2  11  13   28.34    3.67
   2 -11  14    3.19    2.25
   2  11  14    4.23    2.39
   2 -11  15   29.28    4.50
   2  11  15   25.19    3.63
   2 -11  16    1.15    2.16
   2  11  16    0.30    2.14
   2 -11  17   -1.91    2.56
   2  11  17    0.20    1.80
   2 -11  18   -0.38    3.02
   2  11  18    3.81    2.50
   2 -11  19   -0.84    2.32
   2  11  19   -2.28    2.41
   2 -11  20   -0.71    2.12
   2  11  20   -2.06    2.54
   2 -11  21   -0.51    2.34
   2  11  21   -1.52    2.71
   2 -11  22   -0.31    2.47
   2  11  22    0.30    2.99
   2 -11  23   -1.82    2.38
   2  11  23   -1.25    3.15
  -2 -12  24    4.12    2.88
  -2  12  24    8.97    3.49
  -2 -12  23    4.47    3.27
  -2  12  23    2.08    3.25
  -2 -12  22    9.68    3.14
  -2  12  22    9.33    3.34
  -2 -12  21    0.66    2.20
  -2  12  21   -0.11    2.80
  -2 -12  20   17.00    3.96
  -2  12  20   13.63    3.45
  -2 -12  19    0.42    1.73
  -2  12  19    1.25    2.09
  -2 -12  18    5.47    2.28
  -2  12  18    8.06    2.67
  -2 -12  17    2.82    1.97
  -2  12  17    2.89    2.09
  -2 -12  16   31.02    4.06
  -2  12  16   36.55    4.67
  -2 -12  15   25.81    3.69
  -2  12  15   18.24    3.23
  -2 -12  14   85.98    5.83
  -2  12  14   78.94    6.01
  -2 -12  13   73.17    5.04
  -2  12  13   72.58    5.61
  -2 -12  12   71.36    4.62
  -2  12  12   73.77    5.43
  -2 -12  11   17.55    2.61
  -2  12  11   18.37    2.91
  -2 -12  10   12.09    2.32
  -2  12  10   12.38    2.32
  -2 -12   9   13.77    2.19
  -2  12   9    9.36    2.37
  -2 -12   8  157.50    5.51
  -2 -12   7   -0.52    1.01
  -2  12   7   -0.83    1.46
  -2 -12   6  265.64    6.41
  -2  12   6  267.08    8.02
  -2 -12   5   20.94    1.86
  -2  12   5   18.27    2.23
  -2 -12   4  114.51    3.64
  -2  12   4  101.78    4.71
  -2 -12   3    0.74    0.64
  -2  12   3    1.27    1.00
  -2  12   2  212.80    6.50
   2  12  -2  225.82    4.47
   2  12  -1    3.45    0.81
  -2  12   0   15.92    1.89
   2  12   0   14.33    1.27
  -2  12  -1   19.23    2.27
   2  12   1   19.40    1.57
  -2  12  -2   70.56    3.92
   2  12   2   79.52    3.12
  -2  12  -3   24.75    2.47
   2  12   3   27.34    2.11
   2 -12   4   -0.32    0.89
   2  12   4    0.44    0.98
   2 -12   5  147.84    6.22
   2  12   5  152.95    5.25
   2 -12   6  107.53    5.40
   2  12   6  106.38    4.60
   2 -12   7   -0.97    1.01
   2  12   7   -1.26    1.12
   2 -12   8  136.33    6.58
   2  12   8  136.34    5.83
   2 -12   9    0.85    1.48
   2  12   9    1.83    1.34
   2 -12  10   72.90    5.17
   2  12  10   70.22    4.70
   2 -12  11    1.96    2.25
   2  12  11    9.10    2.40
   2 -12  12    3.42    1.99
   2  12  12    4.36    2.16
   2 -12  13    5.73    2.34
   2  12  13    6.75    2.49
   2 -12  14   28.52    4.39
   2  12  14   21.67    3.60
   2 -12  15   14.50    3.76
   2  12  15   16.98    3.22
   2 -12  16   23.94    3.95
   2  12  16   28.44    4.26
   2 -12  17    1.97    2.90
   2  12  17   -0.14    1.72
   2 -12  18   13.11    3.51
   2  12  18    9.93    3.43
   2 -12  19   -1.36    2.11
   2  12  19   -0.28    2.60
   2 -12  20    1.09    2.47
   2  12  20    0.25    2.04
   2 -12  21   -3.84    2.89
   2  12  21   -0.84    2.11
   2 -12  22    8.76    4.12
   2  12  22    8.52    3.30
   2 -12  23    4.81    3.82
   2  12  23    2.52    3.22
  -2 -13  24    7.38    3.81
  -2  13  24    4.63    2.91
  -2 -13  23    0.83    2.99
  -2  13  23    2.62    3.26
  -2 -13  22    7.88    3.03
  -2  13  22   11.39    3.49
  -2 -13  21    2.95    3.05
  -2  13  21    0.07    2.30
  -2 -13  20   -0.28    2.52
  -2  13  20    0.01    2.79
  -2 -13  19   -0.56    1.65
  -2  13  19    0.82    2.76
  -2 -13  18    6.86    2.43
  -2  13  18    7.67    3.31
  -2 -13  17    7.21    2.42
  -2  13  17    6.27    2.60
  -2 -13  16   20.80    3.25
  -2  13  16   21.99    3.69
  -2 -13  15   14.80    2.78
  -2  13  15   14.58    3.41
  -2 -13  14    4.24    2.04
  -2  13  14    5.23    2.33
  -2 -13  13   -0.27    2.00
  -2  13  13    2.50    2.02
  -2 -13  12   20.02    2.95
  -2  13  12   20.87    3.47
  -2 -13  11   -0.48    1.59
  -2  13  11    2.31    1.68
  -2 -13  10   22.01    2.54
  -2  13  10   21.45    2.90
  -2 -13   9   68.47    4.07
  -2  13   9   70.99    4.80
  -2 -13   8   23.05    2.40
  -2  13   8   24.77    2.87
  -2 -13   7   28.85    2.42
  -2  13   7   26.81    2.87
  -2 -13   6   26.25    2.26
  -2  13   6   28.21    3.04
  -2 -13   5   41.48    2.56
  -2  13   5   40.80    3.23
  -2 -13   4   84.15    3.16
  -2  13   4   93.92    4.68
  -2  13   3    8.77    1.63
  -2  13   2   78.48    4.12
   2  13  -2   70.09    2.60
  -2  13   1  110.57    4.77
   2  13  -1  118.53    3.39
  -2  13   0    5.68    1.44
   2  13   0    8.82    1.22
  -2  13  -1  111.29    4.84
   2  13   1  109.20    3.57
  -2  13  -2    6.30    1.47
   2  13   2    4.69    1.10
  -2  13  -3    7.03    1.58
   2  13   3    9.18    1.48
  -2  13  -4   22.01    2.65
   2  13   4   25.14    2.17
   2 -13   5   26.30    2.79
   2  13   5   25.28    2.27
   2 -13   6    0.02    1.06
   2  13   6   -0.97    1.13
   2 -13   7    3.55    1.81
   2  13   7    2.70    1.21
   2 -13   8   39.68    3.69
   2  13   8   39.92    3.27
   2 -13   9    1.96    2.02
   2  13   9    2.58    1.79
   2 -13  10    0.22    2.08
   2  13  10   -0.16    1.59
   2 -13  11   -0.37    1.32
   2  13  11   -0.57    1.19
   2 -13  12    1.89    2.27
   2  13  12    1.24    1.48
   2 -13  13    1.36    2.45
   2  13  13    0.75    2.04
   2 -13  14   57.48    5.71
   2  13  14   54.20    5.14
   2 -13  15    2.90    2.95
   2  13  15   -0.24    1.56
   2 -13  16    0.39    2.13
   2  13  16    0.45    1.77
   2 -13  17   -0.40    2.92
   2  13  17    0.18    2.38
   2 -13  18    2.21    2.45
   2  13  18    0.34    1.86
   2 -13  19   -0.26    2.29
   2  13  19   -0.29    1.98
   2 -13  20    0.21    3.21
   2  13  20   -1.10    2.66
   2 -13  21    1.80    3.40
   2  13  21    1.48    2.95
   2 -13  22    3.38    3.68
   2  13  22    0.00    2.24
  -2 -14  24    7.80    3.74
  -2  14  24    3.28    3.65
  -2 -14  23    3.59    2.82
  -2  14  23    6.58    3.27
  -2  14  22    1.74    3.39
  -2 -14  21   14.16    3.93
  -2  14  21   14.66    3.72
  -2 -14  20   -0.12    1.94
  -2  14  20    0.65    2.29
  -2 -14  19    3.44    2.22
  -2  14  19    6.50    2.92
  -2 -14  18   16.33    3.21
  -2  14  18   16.60    3.62
  -2 -14  17   13.95    2.91
  -2  14  17    9.95    2.92
  -2 -14  16    1.80    1.87
  -2  14  16   -0.38    1.88
  -2 -14  15   54.03    4.80
  -2  14  15   44.21    4.89
  -2 -14  14   75.44    5.41
  -2  14  14   85.99    6.41
  -2 -14  13  100.09    6.00
  -2  14  13  106.29    6.86
  -2 -14  12   17.70    2.64
  -2  14  12   21.00    3.50
  -2 -14  11   83.46    5.01
  -2  14  11   82.77    5.56
  -2 -14  10    2.11    1.31
  -2  14  10    1.89    2.02
  -2 -14   9  110.98    5.13
  -2  14   9  110.71    6.00
  -2 -14   8   23.68    2.44
  -2  14   8   27.19    3.07
  -2 -14   7  191.51    5.92
  -2  14   7  195.23    7.42
  -2 -14   6   15.81    1.88
  -2  14   6   18.07    2.66
  -2 -14   5  140.74    4.58
  -2  14   5  136.80    5.81
  -2 -14   4   67.52    3.09
  -2  14   4   64.27    3.94
  -2  14   3   12.38    2.05
   2  14  -3   14.09    1.51
  -2  14   2  190.26    6.48
   2  14  -2  185.79    4.49
  -2  14   1  145.54    5.69
   2  14  -1  147.10    3.96
  -2  14   0   50.93    3.37
   2  14   0   55.16    2.56
  -2  14  -1    3.05    1.30
   2  14   1    0.36    0.96
  -2  14  -2  124.12    5.27
   2  14   2  132.62    4.36
  -2  14  -3   84.19    4.52
   2  14   3   91.36    3.82
  -2  14  -4    0.69    1.20
   2  14   4    0.04    1.01
   2 -14   5   17.74    2.38
   2  14   5   17.22    2.01
   2 -14   6    4.39    1.42
   2  14   6    5.10    1.32
   2 -14   7   34.25    3.38
   2  14   7   32.00    2.91
   2 -14   8   53.50    4.27
   2  14   8   53.10    3.84
   2 -14   9  107.12    6.32
   2  14   9  110.65    5.69
   2 -14  10   19.76    3.32
   2  14  10   19.05    2.80
   2 -14  11   13.36    2.67
   2  14  11   15.65    2.79
   2 -14  12   74.04    5.76
   2  14  12   64.79    4.90
   2 -14  13   13.80    3.41
   2  14  13   11.88    2.52
   2 -14  14    4.73    2.93
   2  14  14    3.60    1.93
   2 -14  15   35.68    4.99
   2  14  15   31.69    4.01
   2 -14  16   -2.16    1.78
   2  14  16    0.71    1.85
   2 -14  17   31.37    5.12
   2  14  17   21.07    3.98
   2 -14  18    1.54    2.35
   2  14  18   -1.82    1.81
   2 -14  19    4.25    3.40
   2  14  19    2.13    2.78
   2 -14  20   -0.61    3.17
   2  14  20    0.68    2.09
   2 -14  21    4.32    2.81
   2  14  21    2.74    2.68
   2 -14  22    7.79    3.44
   2  14  22   14.04    4.14
  -2 -15  24    0.26    2.41
  -2  15  24    0.31    3.66
  -2 -15  23   13.68    4.31
  -2  15  23   11.26    3.72
  -2  15  22    8.10    3.31
  -2 -15  21    3.51    2.52
  -2  15  21    5.89    3.57
  -2 -15  20   -2.66    1.73
  -2  15  20    2.85    3.18
  -2 -15  19    0.86    1.99
  -2  15  19    4.98    3.33
  -2 -15  18    3.18    2.15
  -2  15  18    6.16    3.28
  -2 -15  17    7.05    2.41
  -2  15  17   10.77    3.09
  -2 -15  16    8.23    2.42
  -2  15  16    5.20    3.02
  -2 -15  15    0.21    1.72
  -2  15  15    0.59    2.04
  -2 -15  14    3.22    2.33
  -2  15  14    1.20    2.01
  -2 -15  13   24.90    3.53
  -2  15  13   17.00    3.24
  -2 -15  12   58.34    4.59
  -2  15  12   57.32    5.16
  -2 -15  11    2.59    1.86
  -2  15  11    2.84    1.77
  -2 -15  10    6.47    1.97
  -2  15  10    5.62    2.44
  -2 -15   9    4.90    1.69
  -2  15   9    4.95    1.81
  -2 -15   8   11.52    1.98
  -2  15   8   10.13    2.18
  -2 -15   7    4.04    1.44
  -2  15   7    6.17    1.76
  -2  15   6    0.73    1.21
  -2 -15   5   43.14    2.70
  -2  15   5   47.88    3.66
  -2 -15   4    4.86    1.20
  -2  15   4    5.53    1.57
  -2  15   3    2.88    1.26
   2  15  -3    2.21    1.11
  -2  15   2    1.74    1.57
   2  15  -2    0.18    0.97
  -2  15   1  236.30    7.38
   2  15  -1  235.87    5.33
  -2  15   0   69.27    4.11
   2  15   0   71.47    3.06
  -2  15  -1   64.19    3.91
   2  15   1   68.09    3.12
  -2  15  -2   -0.28    1.13
   2  15   2    0.32    0.97
  -2  15  -3  144.30    6.09
   2  15   3  156.30    5.13
  -2  15  -4    4.36    1.77
   2  15   4    5.59    1.45
   2 -15   5    0.37    1.02
   2  15   5    1.14    1.17
   2 -15   6   18.12    2.49
   2  15   6   14.86    2.24
   2 -15   7   15.19    2.48
   2  15   7   13.67    2.33
   2 -15   8   -0.95    1.21
   2  15   8   -1.18    1.02
   2 -15   9   11.90    2.49
   2  15   9   11.72    2.17
   2 -15  10    2.98    1.76
   2  15  10    1.94    1.39
   2 -15  11    0.42    1.54
   2  15  11   -0.03    1.39
   2 -15  12    1.21    2.46
   2  15  12    3.27    2.17
   2 -15  13   26.88    4.17
   2  15  13   32.39    3.79
   2 -15  14    1.33    2.77
   2  15  14    1.34    1.76
   2 -15  15   26.11    4.44
   2  15  15   13.45    2.87
   2 -15  16    3.07    2.40
   2  15  16    1.52    1.96
   2 -15  17    3.69    2.45
   2  15  17    1.83    2.10
   2 -15  18    0.41    2.30
   2  15  18    2.24    2.82
   2 -15  19    3.77    3.30
   2  15  19    1.23    2.14
   2 -15  20   -0.17    2.30
   2  15  20   -0.87    2.62
   2 -15  21    1.02    2.64
   2  15  21    1.25    2.36
   2 -15  22    3.54    2.98
   2  15  22    5.01    2.93
  -2 -16  23    5.49    3.68
  -2  16  23    5.06    3.66
  -2 -16  22    5.52    2.82
  -2  16  22    6.16    3.06
  -2 -16  21   -0.16    2.10
  -2  16  21    2.14    2.63
  -2 -16  20    3.85    2.46
  -2  16  20    6.39    2.97
  -2  16  19   18.25    4.03
  -2 -16  18    2.27    2.72
  -2  16  18   -0.89    2.11
  -2 -16  17   13.45    3.27
  -2  16  17   14.21    3.88
  -2 -16  16    4.61    2.16
  -2  16  16    6.23    2.57
  -2 -16  15   39.12    4.24
  -2  16  15   36.61    4.53
  -2 -16  14   41.50    4.39
  -2  16  14   42.63    5.03
  -2 -16  13  125.67    6.65
  -2  16  13  122.77    7.47
  -2 -16  12   42.74    4.11
  -2  16  12   37.00    4.50
  -2 -16  11   19.27    2.86
  -2  16  11   19.39    3.15
  -2 -16  10   40.78    3.38
  -2  16  10   39.76    4.19
  -2 -16   9   63.86    4.00
  -2  16   9   56.99    4.56
  -2 -16   8   46.57    3.36
  -2  16   8   53.65    4.42
  -2 -16   7   18.50    2.19
  -2  16   7   17.47    2.60
  -2 -16   6   98.06    4.21
  -2  16   6  104.02    5.48
  -2 -16   5   56.96    3.09
  -2  16   5   64.83    4.30
  -2 -16   4   13.86    1.62
  -2  16   4   13.72    2.18
  -2  16   3  622.58   12.57
   2  16  -3  632.30    9.57
  -2  16   2    0.31    1.65
   2  16  -2    2.65    1.15
  -2  16   1  180.00    6.54
   2  16  -1  170.56    4.70
  -2  16   0   30.99    2.91
   2  16   0   28.33    2.18
  -2  16  -1  359.42    9.32
   2  16   1  381.06    7.53
  -2  16  -2   -0.68    1.49
   2  16   2   -0.49    0.97
  -2  16  -3   71.17    4.35
   2  16   3   77.70    3.83
  -2  16  -4    4.60    1.80
   2  16   4    8.05    1.61
   2 -16   5   -0.05    1.09
   2  16   5   -0.08    1.14
   2 -16   6    1.23    1.29
   2  16   6    0.89    1.41
   2 -16   7   18.63    2.64
   2  16   7   17.22    2.59
   2 -16   8    7.08    2.05
   2  16   8    5.16    1.68
   2 -16   9   14.72    2.63
   2  16   9   13.38    2.32
   2 -16  10    8.32    2.31
   2  16  10    8.91    2.44
   2 -16  11  105.20    6.61
   2  16  11   98.61    6.10
   2 -16  12   -1.65    2.10
   2  16  12    0.82    1.99
   2 -16  13   87.26    6.60
   2  16  13   72.03    5.52
   2 -16  14   12.95    3.49
   2  16  14    9.51    2.55
   2 -16  15    2.12    2.86
   2  16  15    3.10    2.51
   2 -16  16   11.38    3.77
   2  16  16   14.17    3.39
   2 -16  17    4.98    2.69
   2  16  17    4.27    2.38
   2 -16  18   12.63    4.10
   2  16  18    7.27    2.76
   2 -16  19    4.47    2.69
   2  16  19    6.23    3.20
   2 -16  20   -1.02    2.38
   2  16  20    1.24    2.35
   2 -16  21    9.14    4.29
   2  16  21    3.52    3.23
   2 -16  22    2.64    3.67
   2  16  22    4.89    3.53
  -2 -17  23   -1.09    2.36
  -2  17  23    0.83    2.55
  -2 -17  22    6.46    3.54
  -2  17  22    8.55    3.75
  -2 -17  21    0.95    2.87
  -2  17  21    1.03    3.20
  -2 -17  20    4.87    3.00
  -2  17  20    7.25    3.59
  -2 -17  19    1.38    2.82
  -2  17  19    4.50    3.31
  -2 -17  18    0.84    2.58
  -2  17  18    1.38    2.93
  -2 -17  17    0.24    2.50
  -2  17  17    2.07    2.28
  -2 -17  16    5.87    2.31
  -2  17  16    5.99    2.97
  -2 -17  15    2.38    1.91
  -2  17  15    1.97    2.69
  -2 -17  14    7.06    2.83
  -2  17  14    9.52    3.37
  -2 -17  13   71.04    5.38
  -2  17  13   66.34    5.77
  -2 -17  12   17.00    2.72
  -2  17  12   11.86    2.75
  -2 -17  11   49.83    4.11
  -2  17  11   43.52    4.34
  -2 -17  10    0.80    1.60
  -2  17  10    0.65    2.00
  -2 -17   9    8.53    1.98
  -2  17   9    7.95    2.16
  -2 -17   8   -0.37    1.19
  -2  17   8    0.40    1.86
  -2 -17   7   26.18    2.53
  -2  17   7   26.76    3.37
  -2 -17   6    2.04    1.33
  -2  17   6    1.35    1.37
  -2 -17   5   45.22    2.83
  -2  17   5   40.35    3.51
  -2 -17   4    1.61    1.19
  -2  17   4    1.05    1.69
  -2  17   3    3.17    1.45
   2  17  -3    3.47    1.13
  -2  17   2    6.20    1.96
   2  17  -2    7.68    1.28
  -2  17   1    4.67    1.52
   2  17  -1    6.05    1.19
  -2  17   0    4.87    1.82
   2  17   0    1.38    0.98
   2  17   1    7.89    1.40
  -2  17  -2   35.88    3.34
   2  17   2   34.67    2.60
  -2  17  -3   97.98    5.26
   2  17   3  100.10    4.39
  -2  17  -4   65.44    4.29
   2  17   4   65.80    3.79
   2 -17   5   22.75    2.72
   2  17   5   25.42    2.66
   2 -17   6   -0.57    1.04
   2  17   6    0.30    1.37
   2 -17   7   42.65    3.81
   2  17   7   42.01    3.69
   2 -17   8   -0.08    1.24
   2  17   8   -0.37    1.63
   2 -17   9    0.87    1.47
   2  17   9    0.29    1.70
   2 -17  10   -0.89    1.33
   2  17  10    0.56    1.38
   2 -17  11    3.49    1.99
   2  17  11    3.12    1.69
   2 -17  12    1.86    2.50
   2  17  12    3.89    1.97
   2 -17  13    4.40    2.27
   2  17  13    2.96    1.94
   2 -17  14   13.97    3.23
   2  17  14   11.94    2.84
   2 -17  15   -0.34    2.67
   2  17  15   -0.78    2.29
   2 -17  16   -1.24    2.68
   2  17  16    4.73    2.81
   2 -17  17   -0.79    2.03
   2  17  17   -2.60    2.18
   2 -17  18    1.87    3.19
   2  17  18    0.81    2.22
   2 -17  19    1.60    2.32
   2  17  19    4.96    2.54
   2 -17  20   -2.17    3.14
   2  17  20   -0.06    2.73
   2 -17  21    2.79    2.84
   2  17  21    2.00    2.56
   2 -17  22    1.23    2.79
   2  17  22    0.82    2.42
  -2 -18  23    2.60    3.52
  -2  18  23    0.27    2.48
  -2 -18  22    3.76    3.31
  -2  18  22    1.85    2.59
  -2 -18  21    3.70    3.10
  -2  18  21    2.77    2.65
  -2 -18  20    4.41    3.10
  -2  18  20    1.92    2.40
  -2 -18  19   -0.36    2.49
  -2  18  19   -0.56    2.08
  -2 -18  18   28.49    4.51
  -2  18  18   23.85    4.23
  -2 -18  17   -0.47    2.30
  -2  18  17   -2.10    2.32
  -2 -18  16    9.10    3.02
  -2  18  16   10.58    3.00
  -2 -18  15    5.70    2.11
  -2  18  15    7.65    2.64
  -2 -18  14  131.83    7.33
  -2  18  14  121.60    7.91
  -2 -18  13    8.04    2.83
  -2  18  13   11.02    3.47
  -2 -18  12   69.93    5.16
  -2  18  12   69.36    5.68
  -2 -18  11   34.60    3.60
  -2  18  11   27.78    3.71
  -2 -18  10   29.00    3.14
  -2  18  10   27.71    3.77
  -2 -18   9    4.03    1.67
  -2  18   9    2.78    1.69
  -2 -18   8   36.77    3.14
  -2  18   8   35.10    3.95
  -2 -18   7    4.31    1.41
  -2  18   7    5.12    1.85
  -2 -18   6    1.54    1.11
  -2  18   6    1.18    1.77
  -2 -18   5   10.72    1.59
  -2  18   5   11.16    2.42
  -2 -18   4  164.31    5.25
  -2  18   4  160.92    6.70
  -2  18   3    0.10    1.28
   2  18  -3   -1.52    0.84
  -2  18   2  315.95    9.18
   2  18  -2  311.00    6.79
  -2  18   1   -1.08    1.54
   2  18  -1    0.49    0.93
  -2  18   0  114.97    5.46
   2  18   0  114.66    4.24
  -2  18  -1    1.55    1.34
   2  18   1    2.82    1.29
  -2  18  -2  174.89    6.79
   2  18   2  182.22    5.77
  -2  18  -3   45.47    3.70
   2  18   3   46.78    3.28
  -2  18  -4   11.41    2.47
   2  18   4   12.45    2.05
   2 -18   5    0.61    1.61
   2  18   5   -1.04    1.23
   2 -18   6   11.92    2.24
   2  18   6   12.09    2.02
   2 -18   7    1.60    1.41
   2  18   7   -1.66    1.49
   2 -18   8    5.35    1.91
   2  18   8    2.41    1.85
   2 -18   9    2.07    1.62
   2  18   9   -0.65    1.77
   2 -18  10   30.91    4.05
   2  18  10   28.05    3.59
   2 -18  11    0.49    1.61
   2  18  11   -0.02    1.42
   2 -18  12  121.16    7.57
   2  18  12  111.57    6.73
   2 -18  13    4.55    2.33
   2  18  13    0.49    2.24
   2 -18  14   32.88    4.36
   2  18  14   29.66    3.97
   2 -18  15    6.90    2.65
   2  18  15    5.03    2.73
   2 -18  16    2.39    2.21
   2  18  16    5.90    2.88
   2 -18  17    0.28    2.96
   2  18  17   -0.23    2.49
   2 -18  18    5.66    2.87
   2  18  18    5.05    3.22
   2 -18  19   -1.25    2.90
   2  18  19   -1.29    1.96
   2 -18  20    4.43    2.89
   2  18  20    0.42    2.76
   2 -18  21   -0.42    2.50
   2  18  21    0.57    2.92
  -2 -19  23    0.96    2.38
  -2  19  23    0.81    3.52
  -2 -19  22    0.84    2.24
  -2  19  22    0.23    2.39
  -2 -19  21    0.60    2.08
  -2  19  21    2.76    2.76
  -2 -19  20   -0.03    1.98
  -2  19  20   -0.53    2.20
  -2 -19  19    2.47    2.22
  -2  19  19    3.10    3.16
  -2 -19  18    3.61    2.32
  -2  19  18    4.13    2.62
  -2 -19  17   -0.77    2.45
  -2  19  17    0.15    1.85
  -2 -19  16    1.75    2.33
  -2  19  16    1.06    2.12
  -2 -19  15    4.77    2.09
  -2  19  15    8.02    2.74
  -2 -19  14   38.67    4.41
  -2  19  14   32.49    4.47
  -2 -19  13    6.87    2.81
  -2  19  13    8.18    3.33
  -2 -19  12  112.20    6.38
  -2  19  12   98.96    6.84
  -2 -19  11    8.92    2.37
  -2  19  11   10.52    2.65
  -2 -19  10   21.66    2.85
  -2  19  10   18.40    3.43
  -2 -19   9    7.77    1.89
  -2  19   9   10.29    2.50
  -2 -19   8    6.91    1.81
  -2  19   8    7.50    2.48
  -2 -19   7    3.51    1.41
  -2  19   7    3.02    1.68
  -2 -19   6   26.72    2.59
  -2  19   6   25.76    3.33
  -2 -19   5    0.91    1.20
  -2  19   5    2.16    1.81
  -2 -19   4    8.32    1.52
  -2  19   4    7.33    2.22
  -2  19   3    1.16    1.94
   2  19  -3    3.07    1.40
  -2  19   2   11.00    2.03
   2  19  -2   13.74    1.68
  -2  19   1    0.27    1.54
   2  19  -1    2.38    1.23
  -2  19   0    5.82    1.92
   2  19   0    6.64    1.52
  -2  19  -1    0.95    1.70
   2  19   1    3.05    1.29
  -2  19  -2  137.85    6.17
   2  19   2  139.01    5.27
  -2  19  -3   37.55    3.69
   2  19   3   39.11    3.05
  -2  19  -4   71.30    4.67
   2  19   4   84.34    4.54
   2 -19   5    1.90    1.37
   2  19   5    1.92    1.53
   2 -19   6   31.71    3.53
   2  19   6   32.66    3.14
   2 -19   7    0.57    1.68
   2  19   7    1.59    1.78
   2 -19   8   10.07    2.29
   2  19   8   11.43    2.58
   2 -19   9   -0.17    1.83
   2  19   9    1.63    1.49
   2 -19  10    0.69    2.11
   2  19  10    0.85    1.54
   2 -19  11    3.09    2.43
   2  19  11    1.26    2.17
   2 -19  12    4.24    2.17
   2  19  12    1.85    2.33
   2 -19  13    5.31    2.37
   2  19  13    6.82    2.83
   2 -19  14    5.98    3.01
   2  19  14    3.11    2.17
   2 -19  15    0.26    1.88
   2  19  15   -1.51    2.16
   2 -19  16   -1.22    1.99
   2  19  16    0.14    2.42
   2 -19  17    0.87    2.23
   2  19  17    0.42    1.92
   2 -19  18   -0.79    3.03
   2  19  18   -0.26    2.59
   2 -19  19    0.13    2.24
   2  19  19    1.61    2.75
   2 -19  20    1.25    2.47
   2  19  20    1.65    2.34
   2 -19  21    1.97    3.76
   2  19  21    2.97    2.94
  -2  20  22   -1.85    3.36
  -2 -20  21   -0.88    2.70
  -2  20  21    0.21    3.17
  -2 -20  20   -1.05    2.66
  -2  20  20    1.51    3.10
  -2 -20  19    4.69    3.07
  -2  20  19    4.96    2.83
  -2 -20  18    0.16    2.58
  -2  20  18    0.94    2.31
  -2 -20  17   11.68    3.02
  -2  20  17   12.48    3.36
  -2 -20  16   -2.46    2.10
  -2  20  16    1.14    2.73
  -2 -20  15   18.30    3.47
  -2  20  15   20.36    4.15
  -2 -20  14    2.19    2.49
  -2  20  14    1.78    2.07
  -2 -20  13   81.89    5.91
  -2  20  13   78.43    6.38
  -2 -20  12    5.51    2.48
  -2  20  12    4.25    2.29
  -2 -20  11   18.83    2.92
  -2  20  11   17.72    3.23
  -2 -20  10   10.87    2.32
  -2  20  10    9.80    2.49
  -2 -20   9   39.20    3.50
  -2  20   9   37.89    4.13
  -2 -20   8   21.71    2.65
  -2  20   8   21.13    3.41
  -2 -20   7    0.46    1.19
  -2  20   7   -0.45    1.39
  -2 -20   6    5.06    1.48
  -2  20   6    7.27    2.03
  -2 -20   5   17.42    2.10
  -2  20   5   14.23    2.40
  -2  20   4    3.02    1.56
  -2  20   3  263.10    8.87
   2  20  -3  262.45    6.78
  -2  20   2   20.26    2.69
   2  20  -2   23.69    2.17
  -2  20   1   54.30    4.18
   2  20  -1   57.40    3.26
  -2  20   0   51.70    3.92
   2  20   0   54.38    3.18
  -2  20  -1   35.85    3.61
   2  20   1   39.45    2.88
  -2  20  -2  117.10    5.80
   2  20   2  134.82    5.25
  -2  20  -3  118.28    6.09
   2  20   3  127.38    5.40
  -2  20  -4   49.31    4.27
   2  20   4   48.78    3.65
   2  20   5   34.81    3.31
   2 -20   6    2.16    1.47
   2  20   6    0.80    1.61
   2 -20   7   26.64    3.15
   2  20   7   29.49    3.20
   2 -20   8   29.35    3.72
   2  20   8   30.38    3.40
   2 -20   9   -0.41    1.88
   2  20   9   -0.92    1.77
   2 -20  10    2.37    1.78
   2  20  10    3.07    2.16
   2 -20  11   38.58    4.60
   2  20  11   40.11    4.25
   2 -20  12   13.09    2.99
   2  20  12   15.03    3.39
   2 -20  13   68.68    6.15
   2  20  13   71.94    6.14
   2 -20  14    2.53    2.77
   2  20  14    3.02    2.19
   2 -20  15    7.45    3.25
   2  20  15    7.07    3.01
   2 -20  16   -0.62    2.70
   2  20  16    1.36    1.98
   2 -20  17    9.84    3.22
   2  20  17    5.97    2.62
   2 -20  18    3.88    3.43
   2  20  18    1.78    2.27
   2 -20  19    0.68    3.16
   2  20  19    0.72    2.13
   2 -20  20    0.18    3.13
   2  20  20   -1.93    2.83
   2 -20  21    3.56    3.15
   2  20  21    6.98    3.25
  -2  21  22   -0.76    2.50
  -2 -21  21   -0.02    1.87
  -2  21  21    0.70    2.51
  -2 -21  20   -0.57    2.00
  -2  21  20   -1.23    2.30
  -2 -21  19    0.19    2.67
  -2  21  19    0.51    3.08
  -2 -21  18    3.43    2.91
  -2  21  18    1.06    2.39
  -2 -21  17    0.36    2.64
  -2  21  17   -0.04    2.96
  -2 -21  16   -0.21    1.49
  -2  21  16   -1.50    1.79
  -2 -21  15    1.26    2.30
  -2  21  15    1.31    2.14
  -2 -21  14    1.44    2.37
  -2  21  14    0.90    2.63
  -2 -21  13   75.14    5.73
  -2  21  13   76.39    6.44
  -2 -21  12    1.89    2.21
  -2  21  12    3.47    2.82
  -2 -21  11   64.56    4.76
  -2  21  11   61.48    5.55
  -2 -21  10    0.63    1.69
  -2  21  10    2.47    1.95
  -2 -21   9    8.32    2.09
  -2  21   9   10.83    2.63
  -2 -21   8   18.42    2.77
  -2  21   8   16.81    2.93
  -2 -21   7   20.51    2.47
  -2  21   7   21.90    3.17
  -2 -21   6   -0.54    1.07
  -2  21   6   -0.84    1.22
  -2 -21   5   14.78    2.15
  -2  21   5   10.26    2.45
  -2  21   4    0.65    1.72
   2  21  -4   -2.12    0.96
  -2  21   3   27.99    3.39
   2  21  -3   25.45    2.49
  -2  21   2   24.08    2.93
   2  21  -2   22.99    2.21
  -2  21   1   18.01    2.74
   2  21  -1   19.21    2.19
  -2  21   0    1.56    1.78
   2  21   0    0.79    1.31
  -2  21  -1   51.84    4.02
   2  21   1   54.44    3.44
  -2  21  -2    9.19    2.43
   2  21   2    3.73    1.77
  -2  21  -3  132.21    6.51
   2  21   3  130.92    5.58
  -2  21  -4    0.63    1.89
   2  21   4   -1.04    1.34
  -2  21  -5    0.34    1.38
   2  21   5   -1.84    1.39
   2 -21   6    4.99    2.03
   2  21   6    1.13    1.79
   2 -21   7   18.34    2.79
   2  21   7   20.66    3.05
   2 -21   8    9.76    2.32
   2  21   8   10.60    2.55
   2 -21   9    1.84    1.69
   2  21   9    0.28    1.48
   2 -21  10   -1.58    1.34
   2  21  10   -0.11    1.42
   2 -21  11    1.44    1.85
   2  21  11    0.03    1.47
   2 -21  12   14.65    3.58
   2  21  12   17.50    3.59
   2 -21  13    8.68    2.83
   2  21  13   12.25    3.45
   2 -21  14    1.00    1.93
   2  21  14    0.53    1.89
   2 -21  15    1.10    1.99
   2  21  15   -1.33    2.48
   2 -21  16    2.14    2.36
   2  21  16   -0.69    1.79
   2 -21  17   -3.03    2.64
   2  21  17   -1.00    1.91
   2 -21  18   -1.93    2.05
   2  21  18   -0.62    2.09
   2 -21  19    0.27    3.19
   2  21  19    1.24    2.33
   2 -21  20   -1.98    2.07
   2  21  20    0.11    2.28
   2 -21  21    2.41    3.83
   2  21  21    3.13    3.37
  -2  22  22   -3.19    3.02
  -2  22  21    0.88    3.35
  -2  22  20   -0.67    3.07
  -2  22  19    6.38    3.12
  -2 -22  18    4.49    2.38
  -2  22  18    1.66    3.07
  -2 -22  17   -0.97    2.38
  -2  22  17    0.35    2.17
  -2 -22  16    5.60    2.80
  -2  22  16    0.71    2.13
  -2 -22  15   20.18    3.66
  -2  22  15   19.77    3.80
  -2 -22  14    3.42    2.00
  -2  22  14    5.10    2.52
  -2 -22  13   16.64    2.99
  -2  22  13   16.84    3.84
  -2 -22  12   16.44    3.15
  -2  22  12   17.92    3.79
  -2 -22  11    2.01    2.06
  -2  22  11    0.87    2.58
  -2 -22  10    5.77    2.03
  -2  22  10    6.91    2.37
  -2 -22   9    0.95    1.54
  -2  22   9    3.78    1.99
  -2 -22   8    5.19    2.01
  -2  22   8    2.49    1.92
  -2 -22   7   95.61    4.95
  -2  22   7   95.23    6.30
  -2 -22   6    1.78    1.33
  -2  22   6    2.31    2.07
  -2 -22   5   21.48    2.49
  -2  22   5   19.30    2.78
  -2  22   4   22.60    3.04
   2  22  -4   22.37    2.34
  -2  22   3   62.54    4.79
   2  22  -3   64.07    3.71
  -2  22   2  148.42    6.96
   2  22  -2  151.94    5.43
  -2  22   1   50.67    4.00
   2  22  -1   56.83    3.42
  -2  22   0    1.97    1.88
   2  22   0    1.62    1.27
  -2  22  -1  147.91    6.83
   2  22   1  151.28    5.70
  -2  22  -2   76.30    5.10
   2  22   2   80.47    4.43
  -2  22  -3  121.53    6.35
   2  22   3  115.51    5.42
  -2  22  -4   23.44    3.04
   2  22   4   23.83    2.91
  -2  22  -5   23.59    3.34
   2  22   5   23.35    2.95
   2 -22   6    9.24    2.20
   2  22   6   13.47    2.57
   2 -22   7   36.64    4.07
   2  22   7   43.51    4.13
   2 -22   8    5.74    2.31
   2  22   8    5.63    2.19
   2 -22   9   28.50    3.78
   2  22   9   35.65    4.04
   2 -22  10    4.02    2.43
   2  22  10    8.96    2.80
   2 -22  11   11.21    3.22
   2  22  11   13.31    3.16
   2 -22  12   36.91    4.52
   2  22  12   35.83    4.35
   2 -22  13   22.70    3.74
   2  22  13   31.67    4.17
   2 -22  14    9.86    3.21
   2  22  14    9.90    2.79
   2 -22  15    6.43    3.17
   2  22  15    6.00    3.11
   2 -22  16   -2.71    1.80
   2  22  16    2.33    2.17
   2 -22  17   10.54    3.27
   2  22  17   12.95    3.91
   2 -22  18   -1.35    3.04
   2  22  18    4.93    3.52
   2 -22  19    2.57    2.57
   2  22  19    4.98    3.27
   2 -22  20    0.75    3.23
   2  22  20   -2.59    2.88
  -2  23  22    1.13    3.37
  -2  23  21    0.43    2.58
  -2  23  20    1.24    2.61
  -2  23  19   -0.75    3.01
  -2  23  18    0.65    2.43
  -2  23  17    0.59    2.92
  -2 -23  16   -1.38    2.34
  -2  23  16    1.33    2.97
  -2 -23  15    2.80    2.10
  -2  23  15    5.54    3.16
  -2 -23  14    1.56    2.53
  -2  23  14    1.58    2.28
  -2 -23  13   -0.42    2.08
  -2  23  13    0.38    2.68
  -2 -23  12   46.49    4.51
  -2  23  12   46.03    5.20
  -2 -23  11    1.43    1.94
  -2  23  11   -4.49    2.01
  -2 -23  10   10.55    2.34
  -2  23  10   11.19    2.77
  -2 -23   9    1.22    1.62
  -2  23   9   -1.27    2.20
  -2 -23   8   35.93    3.40
  -2  23   8   29.68    3.78
  -2 -23   7   12.42    2.20
  -2  23   7   12.07    2.92
  -2 -23   6    7.75    2.00
  -2  23   6    8.70    2.61
  -2 -23   5    0.45    1.26
  -2  23   5    1.19    1.42
  -2  23   4   -0.85    1.75
   2  23  -4   -1.61    1.37
  -2  23   3    0.52    1.33
   2  23  -3    0.19    1.40
  -2  23   2   46.68    4.16
   2  23  -2   38.78    2.92
  -2  23   1   16.17    2.48
   2  23  -1   15.38    2.07
  -2  23   0   22.36    2.88
   2  23   0   21.52    2.37
  -2  23  -1   10.10    2.20
   2  23   1    8.09    1.86
  -2  23  -2   69.96    4.95
   2  23   2   69.75    4.29
  -2  23  -3    9.38    2.60
   2  23   3    4.32    1.77
  -2  23  -4   41.40    3.95
   2  23   4   38.73    3.52
  -2  23  -5   -1.07    1.86
   2  23   5   -2.23    1.50
   2 -23   6   -0.39    1.80
   2  23   6    2.80    1.90
   2 -23   7    1.39    1.92
   2  23   7    0.81    1.47
   2 -23   8    0.64    1.43
   2  23   8   -0.16    1.78
   2 -23   9   -1.10    1.29
   2  23   9   -1.42    1.30
   2 -23  10    0.45    1.62
   2  23  10    1.02    2.16
   2 -23  11   10.81    2.84
   2  23  11   12.86    3.23
   2 -23  12    3.04    2.81
   2  23  12    0.24    1.80
   2 -23  13    1.74    2.60
   2  23  13    0.51    1.91
   2 -23  14    3.46    2.18
   2  23  14    2.31    2.07
   2 -23  15   -0.52    1.99
   2  23  15    0.27    2.52
   2 -23  16    0.54    3.01
   2  23  16    5.65    3.02
   2 -23  17    1.30    3.27
   2  23  17    2.99    2.95
   2 -23  18   -1.57    2.26
   2  23  18   -0.08    2.19
   2 -23  19   -1.93    3.07
   2  23  19    1.96    2.38
   2 -23  20    1.94    2.69
   2  23  20    0.21    2.28
  -2  24  21    0.63    2.46
  -2  24  20   -0.18    3.38
  -2  24  19    0.25    2.31
  -2  24  18    1.07    2.90
  -2  24  17   -0.35    2.15
  -2  24  16    2.91    2.49
  -2  24  15   -1.08    1.97
  -2  24  14   54.54    6.15
  -2 -24  13   -0.74    1.91
  -2  24  13    1.79    2.27
  -2 -24  12    3.51    2.29
  -2  24  12    4.44    2.45
  -2 -24  11   -2.53    1.66
  -2  24  11    0.27    1.87
  -2 -24  10    2.11    1.83
  -2  24  10    3.85    2.65
  -2 -24   9   -0.45    1.46
  -2  24   9    3.61    2.67
  -2 -24   8   21.31    2.81
  -2  24   8   22.87    3.87
  -2 -24   7   11.92    2.22
  -2  24   7   10.63    2.53
  -2 -24   6   32.10    3.00
  -2  24   6   37.07    4.03
  -2 -24   5   -0.99    1.51
  -2  24   5   -0.33    1.78
  -2  24   4   16.70    2.77
   2  24  -4   16.55    2.22
  -2  24   3   26.90    3.27
   2  24  -3   24.02    2.63
  -2  24   2   54.90    4.60
   2  24  -2   45.43    3.34
  -2  24   1   10.33    2.24
   2  24  -1   10.69    1.97
  -2  24   0  118.22    6.36
   2  24   0  114.34    5.13
  -2  24  -1    5.35    2.34
   2  24   1    5.27    1.98
  -2  24  -2  134.92    6.64
   2  24   2  143.47    6.06
  -2  24  -3   15.92    2.95
   2  24   3   11.90    2.30
  -2  24  -4   56.66    4.57
   2  24   4   66.92    4.54
  -2  24  -5   -1.49    1.22
   2  24   5    0.32    1.67
   2 -24   6   10.02    2.61
   2  24   6   11.88    2.50
   2 -24   7    4.22    1.80
   2  24   7    0.34    1.90
   2 -24   8   45.29    4.50
   2  24   8   46.48    4.38
   2 -24   9    2.86    2.25
   2  24   9    3.67    2.28
   2 -24  10   24.54    3.86
   2  24  10   25.21    3.58
   2 -24  11    8.28    3.11
   2  24  11    8.71    2.53
   2 -24  12   30.97    4.22
   2  24  12   34.23    4.61
   2 -24  13    6.02    2.41
   2  24  13    8.55    2.64
   2 -24  14   14.60    3.65
   2  24  14   17.19    3.56
   2 -24  15    2.91    2.89
   2  24  15    4.36    2.50
   2 -24  16    8.59    3.04
   2  24  16   15.82    4.01
   2 -24  17    1.14    2.55
   2  24  17   -0.36    2.02
   2 -24  18    4.73    3.81
   2  24  18    3.89    2.71
   2 -24  19   -0.56    3.30
   2  24  19   -2.26    2.17
   2 -24  20   -1.13    3.34
   2  24  20   -1.41    2.35
  -2  25  21   -0.74    3.29
  -2  25  20   -1.13    2.38
  -2  25  19    0.83    3.07
  -2  25  18    0.12    2.15
  -2  25  17   -1.11    2.13
  -2  25  16   14.81    4.17
  -2  25  15    1.93    2.37
  -2  25  14    3.53    2.59
  -2  25  13    6.67    2.86
  -2  25  12    6.59    3.14
  -2  25  11    4.82    2.41
  -2  25  10   -0.19    2.43
  -2 -25   9    6.21    1.87
  -2  25   9   18.79    3.47
  -2 -25   8   11.72    2.27
  -2  25   8   17.79    3.19
  -2 -25   7    0.30    1.48
  -2  25   7    1.39    1.77
  -2 -25   6    7.54    2.03
  -2  25   6    7.40    2.69
  -2 -25   5   -1.54    1.16
  -2  25   5   -0.93    1.38
  -2  25   4    0.83    1.86
   2  25  -4    0.98    1.27
  -2  25   3    1.74    1.93
   2  25  -3    0.38    1.42
  -2  25   2   20.50    3.18
   2  25  -2   17.56    2.22
  -2  25   1   21.22    2.94
   2  25  -1   21.70    2.47
  -2  25   0   16.76    2.95
   2  25   0   15.11    2.20
  -2  25  -1    3.72    1.75
   2  25   1    1.30    1.53
  -2  25  -2    6.68    2.36
   2  25   2    3.57    1.76
  -2  25  -3   13.21    2.88
   2  25   3   15.37    2.47
  -2  25  -4    7.12    2.11
  -2  25  -5    2.37    1.64
   2  25   5    0.25    1.64
   2 -25   6    0.52    1.43
   2  25   6    0.12    1.73
   2 -25   7   -1.14    1.79
   2  25   7    1.61    1.99
   2 -25   8    2.27    1.70
   2  25   8    0.13    2.06
   2 -25   9   -0.48    2.08
   2  25   9    1.63    2.18
   2 -25  10    0.22    1.73
   2  25  10   -0.27    2.01
   2 -25  11    1.90    1.96
   2  25  11    1.68    2.41
   2 -25  12    0.20    2.46
   2  25  12    0.69    2.36
   2 -25  13    0.62    2.56
   2  25  13    1.64    1.96
   2 -25  14    8.18    2.83
   2  25  14   11.51    3.11
   2 -25  15    1.29    2.12
   2  25  15   -0.63    1.77
   2 -25  16   -1.16    2.09
   2  25  16    1.80    3.16
   2 -25  17   -0.15    3.12
   2  25  17    2.71    2.66
   2 -25  18   -2.16    3.19
   2  25  18    1.01    3.21
   2 -25  19   -2.96    2.10
   2  25  19    1.16    3.16
  -2  26  21    0.90    2.72
  -2  26  20    4.13    3.72
  -2  26  19    1.76    2.76
  -2  26  18    2.38    3.35
  -2  26  17    1.31    3.17
  -2  26  16    2.85    3.33
  -2  26  15   21.80    4.75
  -2  26  14    5.34    2.81
  -2  26  13   29.63    4.91
  -2  26  12   15.34    3.98
  -2  26  11   -0.24    2.57
  -2  26  10   19.89    3.70
  -2  26   9   11.65    2.99
  -2  26   8   12.17    2.83
  -2  26   7   15.95    3.34
  -2  26   6   10.84    2.58
  -2  26   5   15.51    3.27
  -2  26   4   13.68    2.71
  -2  26   3   11.78    2.71
  -2  26   2    1.15    1.89
  -2  26   1   49.71    4.46
  -2  26   0    0.10    1.37
  -2  26  -1  130.40    6.81
   2  26   1  125.61    5.71
  -2  26  -2    3.31    2.14
   2  26   2    4.44    1.81
  -2  26  -3   79.20    5.42
   2  26   3   84.36    5.13
  -2  26  -4    5.21    1.95
   2  26   4   12.07    2.45
  -2  26  -5   16.41    2.80
   2  26   5   20.03    2.94
   2 -26   6    7.02    2.10
   2  26   6    8.06    2.40
   2 -26   7   38.66    4.33
   2  26   7   39.27    4.26
   2 -26   8    1.84    1.72
   2  26   8    4.30    2.32
   2 -26   9   39.93    4.35
   2  26   9   43.27    4.53
   2 -26  10   -1.46    2.07
   2  26  10    1.42    2.39
   2 -26  11   10.22    3.26
   2  26  11   20.61    3.81
   2 -26  12   -0.41    1.77
   2  26  12   -0.50    2.41
   2 -26  13    9.99    3.25
   2  26  13   15.60    3.82
   2 -26  14    8.66    3.38
   2  26  14   12.43    3.22
   2 -26  15    2.84    3.04
   2  26  15    2.91    2.25
   2 -26  16    6.44    3.51
   2  26  16    6.68    3.43
   2 -26  17    7.33    3.16
   2  26  17   13.49    4.09
   2 -26  18    4.31    2.87
   2  26  18    5.76    3.59
   2 -26  19   -1.14    3.17
   2  26  19    1.21    2.59
  -2  27  20   -0.03    2.62
  -2  27  19    2.17    3.50
  -2  27  18    2.42    2.59
  -2  27  17    6.62    3.35
  -2  27  16   -0.60    2.28
  -2  27  15    4.97    2.85
  -2  27  14    0.77    3.15
  -2  27  13    2.06    2.36
  -2  27  12    3.53    2.50
  -2  27  11   -0.38    2.63
  -2  27  10   -0.10    2.60
  -2  27   9    4.20    2.70
  -2  27   8    7.51    2.96
  -2  27   7    3.14    2.03
  -2  27   6    4.41    2.50
  -2  27   5    1.74    2.32
  -2  27   4    9.16    2.39
  -2  27   3    0.83    2.01
  -2  27   2    1.82    2.03
  -2  27   1   12.02    2.74
  -2  27   0    0.42    1.85
  -2  27  -1    7.66    2.05
  -2  27  -2    0.08    1.30
  -2  27  -3    3.83    2.28
  -2  27  -4   -0.36    1.87
  -2  27  -5   10.52    2.42
   2  27   5    7.60    2.26
   2 -27   6   11.62    2.55
   2  27   6   13.46    2.87
   2 -27   7    8.34    2.66
   2  27   7    7.26    2.61
   2 -27   8   -0.34    2.09
   2  27   8   -1.30    2.04
   2 -27   9   10.28    3.04
   2  27   9   11.74    3.15
   2 -27  10    5.86    2.75
   2  27  10    6.50    2.95
   2 -27  11   -1.58    1.65
   2  27  11    1.58    2.52
   2 -27  12    2.13    2.81
   2  27  12    2.42    2.69
   2 -27  13   47.50    5.34
   2  27  13   18.36    3.97
   2 -27  14    1.08    2.18
   2  27  14    3.94    2.46
   2 -27  15    2.84    2.40
   2  27  15    5.55    2.68
   2 -27  16   -0.24    2.23
   2  27  16    2.10    3.00
   2 -27  17    1.31    2.52
   2  27  17    2.20    3.13
   2 -27  18    0.78    3.42
   2  27  18   -4.15    2.55
   2 -27  19    3.52    3.65
   2  27  19    2.31    2.71
  -2  28  20    0.04    3.72
  -2  28  19    8.97    3.70
  -2  28  18    1.70    3.57
  -2  28  17    9.43    4.09
  -2  28  16    1.56    3.46
  -2  28  15    6.33    3.05
  -2  28  14   28.18    4.78
  -2  28  13    9.97    3.23
  -2  28  12    6.34    2.83
  -2  28  11   15.54    3.59
  -2  28  10   -0.62    2.67
  -2  28   9   26.50    4.06
  -2  28   8   17.87    3.41
  -2  28   7   10.93    3.23
  -2  28   6    4.38    2.69
  -2  28   5   34.27    4.11
  -2  28   4    0.35    2.13
  -2  28   3   18.20    3.03
  -2  28   2   19.55    3.31
  -2  28   1    8.36    2.58
  -2  28   0   15.35    3.00
  -2  28  -1   23.55    3.39
  -2  28  -2   23.22    3.39
  -2  28  -3   14.63    2.95
  -2  28  -4   -1.99    1.81
  -2  28  -5   12.36    2.90
   2 -28   6    4.67    1.97
   2 -28   7   18.19    3.37
   2 -28   8   23.64    3.76
   2 -28   9    7.46    2.84
   2 -28  10   10.47    3.08
   2  28  10   16.29    3.66
   2 -28  11    0.18    1.83
   2  28  11    0.41    2.54
   2 -28  12    4.93    2.94
   2  28  12    4.50    2.89
   2 -28  13    8.98    3.40
   2  28  13   13.17    3.73
   2 -28  14    1.06    2.03
   2  28  14    4.02    2.57
   2 -28  15    4.64    2.60
   2  28  15    7.61    2.87
   2 -28  16    0.94    3.08
   2  28  16    0.40    2.23
   2 -28  17    1.74    3.36
   2  28  17    3.81    3.39
   2 -28  18    0.71    3.35
   2  28  18   -0.02    2.52
  -2  29  19   10.85    4.46
  -2  29  18    1.11    2.73
  -2  29  17    4.02    3.02
  -2  29  16    0.46    2.63
  -2  29  15    4.07    3.44
  -2  29  14    1.75    2.47
  -2  29  13    3.94    3.27
  -2  29  12    2.51    3.17
  -2  29  11   -0.27    2.96
  -2  29  10   -0.30    1.90
  -2  29   9    4.48    2.40
  -2  29   8    1.63    2.55
  -2  29   7    3.47    2.09
  -2  29   6    3.48    2.69
  -2  29   5   11.57    3.16
  -2  29   4    0.76    2.23
  -2  29   3    1.18    1.67
  -2  29   2    1.90    2.12
  -2  29   1   10.50    2.72
  -2  29   0    1.96    2.14
  -2  29  -1    2.83    2.16
  -2  29  -2    1.17    1.56
  -2  29  -3    7.83    2.24
  -2  29  -4    4.28    2.32
  -2  29  -5    0.79    2.06
   2 -29   6    1.50    1.65
   2 -29   7    2.42    2.35
   2 -29   8    6.26    2.54
   2 -29   9    2.39    2.45
   2 -29  10    0.33    1.70
   2 -29  11    6.63    3.06
   2 -29  12    2.57    2.23
   2 -29  13    3.08    2.86
   2 -29  14    4.62    3.18
   2 -29  15    1.19    2.99
   2 -29  16    0.99    3.11
   2 -29  17   -0.14    3.27
   2 -29  18   -0.45    2.29
  -2  30  19    1.35    2.94
  -2  30  18   12.11    4.42
  -2  30  17    2.07    3.86
  -2  30  16    7.28    3.78
  -2  30  15    3.23    2.81
  -2  30  14   10.17    3.97
  -2  30  13   10.61    3.48
  -2  30  12   19.10    4.17
  -2  30  11    9.71    3.54
  -2  30  10   18.00    4.09
  -2  30   9   -2.16    2.50
  -2  30   8   26.69    4.44
  -2  30   7    0.08    2.35
  -2  30   6    0.32    1.81
  -2  30   5    2.48    2.07
  -2  30   4   16.92    3.10
  -2  30   3    0.50    2.20
  -2  30   2   10.91    2.99
  -2  30   1   -0.77    1.97
  -2  30   0    2.32    1.71
  -2  30  -1   -0.85    1.36
  -2  30  -2   17.53    3.17
  -2  30  -3   -0.87    1.90
  -2  30  -4    4.85    1.96
  -2  30  -5   12.88    3.06
   2 -30   6   13.67    2.71
   2 -30   7   -2.65    1.80
   2 -30   8   10.97    2.88
   2 -30   9    1.96    2.32
   2 -30  10    0.13    1.65
   2 -30  11    1.15    2.59
   2 -30  12   11.21    3.01
   2 -30  13    0.35    2.64
   2 -30  14    5.39    3.24
   2 -30  15    4.55    3.08
   2 -30  16    2.01    3.33
   2 -30  17   -0.90    2.35
  -2  31  18   11.34    3.96
  -2  31  17    3.77    2.99
  -2  31  16   -2.55    3.20
  -2  31  15   -2.30    3.15
  -2  31  14    3.53    2.97
  -2  31  13    4.24    3.38
  -2  31  12    4.94    3.39
  -2  31  11    1.70    2.35
  -2  31   9    0.81    2.05
  -2  31   8    2.55    2.14
  -2  31   7   -0.02    1.91
  -2  31   6    3.27    2.71
  -2  31   5   -1.07    2.27
  -2  31   4   39.66    4.73
  -2  31   3    1.14    2.20
  -2  31   2   -0.35    1.48
  -2  31   1   -1.69    1.89
  -2  31   0   -0.87    1.28
  -2  31  -1   -0.55    1.85
  -2  31  -2   -2.13    1.75
  -2  31  -3    4.11    2.26
  -2  31  -4   -0.82    1.93
  -2  31  -5   -1.05    1.99
   2 -31   6    0.72    2.05
   2 -31   7    1.13    2.15
   2 -31   8   -1.76    1.98
   2 -31   9    0.29    2.28
   2 -31  10    5.15    2.27
   2 -31  11   -1.63    2.33
   2 -31  12    5.75    2.99
   2 -31  13    2.82    2.25
   2 -31  14    4.58    3.04
   2 -31  15    4.58    3.23
   2 -31  16   -0.07    2.20
   2 -31  17    1.35    2.26
  -2  32  18    8.20    4.11
  -2  32  17   10.68    4.50
  -2  32  16    4.85    3.26
  -2  32  15    3.51    3.00
  -2  32  14    0.34    3.09
  -2  32  13   14.68    4.37
  -2  32  12    6.03    3.53
  -2  32  11   13.89    4.17
  -2  32  10   18.73    3.99
  -2  32   9   10.91    3.63
  -2  32   8   -1.51    2.55
  -2  32   7   11.49    3.54
  -2  32   6    8.64    2.90
  -2  32   5    6.26    2.97
  -2  32   4    6.91    2.92
  -2  32   3   21.19    3.72
  -2  32   2    0.67    1.69
  -2  32   1   -2.88    1.93
  -2  32   0   11.28    3.01
  -2  32  -1    1.24    2.15
  -2  32  -2    0.70    1.97
  -2  32  -3   10.21    2.90
  -2  32  -4   25.85    3.90
  -2  32  -5   13.01    2.95
   2 -32   6   14.68    3.29
   2 -32   7   12.78    3.14
   2 -32   8    3.46    2.47
   2 -32   9    2.29    2.42
   2 -32  10    1.62    2.45
   2 -32  11    6.74    3.11
   2 -32  12    2.70    2.84
   2 -32  13   13.02    3.26
   2 -32  14    3.70    2.32
   2 -32  15    1.61    2.15
  -2  33  17    4.56    4.09
  -2  33  16   -2.06    3.49
  -2  33  15   -0.59    3.32
  -2  33  14    0.13    3.36
  -2  33  13    4.43    2.84
  -2  33  12   -0.31    2.25
  -2  33  11   -0.73    2.23
  -2  33  10    1.95    3.28
  -2  33   9    1.25    2.25
  -2  33   8    1.14    2.38
  -2  33   7    5.49    2.60
  -2  33   6    5.04    3.17
  -2  33   5   27.16    4.09
  -2  33   4   12.58    3.44
  -2  33   3   25.30    3.82
  -2  33   2    1.09    1.83
  -2  33   1   -0.14    2.23
  -2  33   0    1.34    2.30
  -2  33  -1    0.06    1.53
  -2  33  -2    1.42    2.24
  -2  33  -3    1.44    2.27
  -2  33  -4    2.23    1.96
   2 -33   6    0.92    2.23
   2 -33   7    2.74    2.47
   2 -33   8    0.69    2.24
   2 -33   9    2.12    2.59
   2 -33  10    0.34    2.49
   2 -33  11    6.40    3.15
   2 -33  12   -0.03    2.53
  -2  34  17    4.52    3.88
  -2  34  16   -1.47    2.70
  -2  34  15    3.23    3.76
  -2  34  14    3.38    2.74
  -2  34  13   -1.94    3.09
  -2  34  12   -0.44    3.36
  -2  34  11    7.91    3.75
  -2  34  10    3.50    2.56
  -2  34   9    2.93    3.19
  -2  34   8    7.08    3.53
  -2  34   7   10.48    3.69
  -2  34   6    4.32    2.45
  -2  34   5   34.53    4.89
  -2  34   4   16.59    3.34
  -2  34   3    3.78    2.26
  -2  34   2    1.88    1.95
  -2  34   1   20.08    3.75
  -2  34   0   -0.31    2.26
  -2  34  -1   10.60    3.05
  -2  34  -2    1.02    1.79
  -2  34  -3   19.91    3.67
  -2  34  -4    2.49    2.43
   2 -34   6    3.37    2.09
   2 -34   7   13.63    2.89
   2 -34   8    0.53    2.22
   2 -34   9    7.66    2.95
  -2  35  16    0.59    3.90
  -2  35  15    7.25    3.19
  -2  35  14    0.38    3.33
  -2  35  13   -1.39    2.33
  -2  35  12    0.90    2.53
  -2  35  11   -2.19    2.91
  -2  35  10    0.01    2.88
  -2  35   9    5.48    3.57
  -2  35   8    1.84    2.43
  -2  35   7    1.86    2.33
  -2  35   6   14.61    3.87
  -2  35   5    7.32    3.32
  -2  35   4   20.49    4.12
  -2  35   3    8.92    3.14
  -2  35   2    5.93    2.85
  -2  35   1    2.88    2.56
  -2  35   0   -1.50    2.16
  -2  35  -1    2.37    2.48
  -2  35  -2    0.10    2.31
  -2  35  -3    6.98    2.43
  -2  35  -4    1.63    1.85
   2 -35   5    3.50    2.53
  -2  36  15    0.44    3.60
  -2  36  14    0.81    2.73
  -2  36  13    1.75    3.40
  -2  36  12    1.15    3.44
  -2  36  11    0.54    2.99
  -2  36  10    6.55    3.11
  -2  36   9    0.23    3.13
  -2  36   8   15.29    4.31
  -2  36   7    2.03    3.08
  -2  36   6   30.84    4.96
  -2  36   5    1.01    2.13
  -2  36   4    5.63    3.13
  -2  36   3    7.46    3.09
  -2  36   2    4.38    2.68
  -2  37  15   -0.13    2.87
  -2  37  14    4.01    4.02
  -2  37  13   -3.95    3.19
  -2  37  12    1.28    3.39
  -2  37  11    0.03    3.15
  -2  37  10    3.84    3.73
  -2  37   8    9.86    3.26
  -3   0  25    1.73    2.54
  -3   0  24    0.37    2.01
  -3   0  23    6.99    2.89
  -3   0  22    1.55    2.21
  -3   0  21   13.89    3.89
  -3   0  20   -0.64    2.52
  -3   0  19    9.92    2.75
  -3   0  18    0.27    1.73
  -3   0  17   -0.12    2.20
  -3   0  16   -0.37    1.52
  -3   0  15   10.36    2.88
  -3   0  14    0.24    1.84
  -3   0  13    7.08    2.13
  -3   0  12    0.62    1.60
  -3   0  11   51.52    3.74
  -3   0  10   -0.99    0.98
  -3   0   9  146.62    5.51
  -3   0   8   -0.67    0.68
  -3   0   7    0.49    0.77
  -3   0   6   -0.22    0.63
  -3   0   5   39.75    2.24
  -3   0   4   -1.51    0.73
  -3   0   3  870.13    9.85
  -3   0   2    0.75    0.74
  -3   0   1  144.99    3.62
  -3   0   0   -1.06    0.77
   3   0   1  241.59    5.11
   3   0   2    0.55    1.04
   3   0   3    9.78    1.39
   3   0   4   -0.05    0.76
   3   0   5  356.53    7.89
   3   0   6    0.18    1.05
   3   0   7  251.01    7.53
   3   0   8   -0.67    1.05
   3   0   9    5.61    2.24
   3   0  10    0.22    1.46
   3   0  11    8.29    2.07
   3   0  12   -1.11    1.38
   3   0  13    7.42    2.60
   3   0  14    0.05    1.68
   3   0  15   37.47    4.40
   3   0  16    2.02    2.15
   3   0  17    7.31    2.66
   3   0  18    0.20    2.49
   3   0  19    0.38    2.08
   3   0  20    1.08    2.37
   3   0  21    5.92    3.66
   3   0  22   -0.96    2.18
   3   0  23   -0.58    2.41
  -3  -1  25    1.10    2.48
  -3   1  25    1.78    2.66
  -3  -1  24   -0.44    2.05
  -3   1  24    2.32    2.52
  -3  -1  23    9.48    3.08
  -3   1  23    6.38    2.81
  -3  -1  22   12.69    3.48
  -3   1  22   19.57    4.35
  -3  -1  21   19.75    3.91
  -3   1  21   24.59    4.63
  -3  -1  20    4.09    2.98
  -3   1  20    5.59    2.52
  -3  -1  19    2.23    2.47
  -3   1  19    2.18    2.06
  -3  -1  18   -1.07    1.49
  -3   1  18   -1.75    2.09
  -3  -1  17   14.95    2.91
  -3   1  17   14.35    3.00
  -3  -1  16   15.23    3.18
  -3   1  16   15.33    3.32
  -3  -1  15   68.67    5.08
  -3   1  15   66.66    5.13
  -3  -1  14   17.67    2.91
  -3   1  14   14.56    2.59
  -3  -1  13   75.41    4.92
  -3   1  13   71.43    4.81
  -3  -1  12   34.68    3.41
  -3   1  12   34.33    3.46
  -3  -1  11  142.49    5.96
  -3   1  11  149.44    6.30
  -3  -1  10    2.45    1.56
  -3   1  10    1.42    1.27
  -3  -1   9    1.75    1.38
  -3   1   9    2.08    1.13
  -3  -1   8    9.01    1.46
  -3   1   8    8.15    1.45
  -3  -1   7   14.35    1.77
  -3   1   7   14.20    1.65
  -3  -1   6   10.36    1.39
  -3   1   6    9.59    1.32
  -3  -1   5    6.29    1.15
  -3   1   5    8.28    1.40
  -3  -1   4  199.75    4.33
  -3   1   4  199.33    4.68
  -3  -1   3  454.42    6.38
  -3   1   3  444.29    6.92
  -3  -1   2   71.92    2.31
  -3   1   2   70.37    2.65
  -3  -1   1  888.36    9.73
  -3   1   1  832.83   10.03
  -3  -1   0   98.54    2.88
  -3   1   0   92.72    3.18
  -3   1  -1  210.54    4.94
   3   1   1  204.05    4.46
   3  -1   2  316.04    6.54
   3   1   2  302.62    5.86
   3  -1   3  505.60    8.83
   3   1   3  515.74    8.55
   3  -1   4   45.82    2.82
   3   1   4   43.43    2.64
   3  -1   5   31.35    2.66
   3   1   5   34.14    2.50
   3  -1   6   76.78    3.95
   3   1   6   75.60    4.01
   3  -1   7   13.28    2.03
   3   1   7   12.72    2.14
   3  -1   8    7.26    1.72
   3   1   8    6.77    1.94
   3  -1   9  341.16    9.80
   3   1   9  358.31    9.77
   3  -1  10   28.03    3.20
   3   1  10   30.68    3.21
   3  -1  11   35.74    3.60
   3   1  11   35.28    3.59
   3  -1  12    1.64    1.99
   3   1  12    4.30    1.86
   3  -1  13   45.33    4.62
   3   1  13   48.62    4.44
   3  -1  14   18.47    3.16
   3   1  14   11.05    2.66
   3  -1  15   86.22    6.66
   3   1  15   82.35    6.14
   3  -1  16   28.18    4.42
   3   1  16   24.86    4.21
   3  -1  17   14.14    3.63
   3   1  17   15.40    3.29
   3  -1  18    4.32    2.38
   3   1  18   -0.18    1.96
   3  -1  19    8.47    2.95
   3   1  19    8.81    3.46
   3  -1  20    4.36    2.70
   3   1  20    5.58    2.80
   3  -1  21    6.76    3.83
   3   1  21    7.16    3.17
   3  -1  22   -0.59    2.34
   3   1  22   -1.84    2.93
   3  -1  23    2.35    2.81
   3   1  23    3.33    2.68
  -3  -2  25    1.43    3.12
  -3   2  25    5.02    2.87
  -3  -2  24    4.69    2.65
  -3   2  24    4.89    2.70
  -3  -2  23    0.26    2.16
  -3   2  23   -0.40    1.94
  -3  -2  22    8.16    3.03
  -3   2  22    9.19    3.49
  -3  -2  21    6.55    2.73
  -3   2  21    3.04    2.34
  -3  -2  20    6.75    2.54
  -3   2  20    5.45    2.61
  -3  -2  19    5.76    2.34
  -3   2  19    4.90    2.78
  -3  -2  18   -2.98    1.82
  -3   2  18    0.56    1.66
  -3  -2  17    0.38    2.09
  -3   2  17    2.50    2.50
  -3  -2  16    1.46    1.76
  -3   2  16    4.77    2.25
  -3  -2  15    9.26    2.61
  -3   2  15    4.82    2.16
  -3  -2  14    0.95    1.40
  -3   2  14    2.07    1.64
  -3  -2  13   19.29    2.80
  -3   2  13   17.23    2.62
  -3  -2  12   26.63    3.04
  -3   2  12   30.46    3.41
  -3  -2  11  125.29    5.63
  -3   2  11  125.71    5.92
  -3  -2  10   91.77    4.49
  -3   2  10   91.10    4.87
  -3  -2   9   88.26    4.21
  -3   2   9   90.53    4.39
  -3  -2   8   14.58    1.68
  -3   2   8   16.56    1.92
  -3  -2   7   53.83    2.83
  -3   2   7   50.33    2.97
  -3  -2   6   15.02    1.57
  -3   2   6   12.70    1.57
  -3  -2   5  545.26    7.81
  -3   2   5  549.28    8.89
  -3  -2   4    5.42    0.91
  -3   2   4    6.15    1.06
  -3  -2   3  160.74    3.38
  -3   2   3  158.00    4.17
  -3  -2   2    6.47    0.78
  -3   2   2    6.18    1.02
  -3   2   1   83.27    3.03
  -3   2   0  563.85    8.42
   3   2   0  574.05    7.17
  -3   2  -1  489.22    8.13
   3   2   1  498.20    6.97
   3  -2   2  173.76    5.05
   3   2   2  160.92    4.15
   3  -2   3    6.11    1.28
   3   2   3    4.77    0.98
   3  -2   4   20.19    2.14
   3   2   4   15.82    1.62
   3  -2   5   33.59    2.69
   3   2   5   37.17    2.57
   3  -2   6  582.36   11.24
   3   2   6  586.55   10.80
   3  -2   7   -0.86    0.90
   3   2   7   -0.58    0.99
   3  -2   8   75.27    4.56
   3   2   8   79.22    4.35
   3  -2   9   21.73    2.81
   3   2   9   19.09    2.75
   3  -2  10    2.01    2.02
   3   2  10    0.46    1.89
   3  -2  11    1.89    1.67
   3   2  11    3.20    2.14
   3  -2  12    3.62    2.18
   3   2  12    5.02    1.93
   3  -2  13    2.06    1.76
   3   2  13    1.04    1.54
   3  -2  14    2.77    2.01
   3   2  14    2.50    1.94
   3  -2  15    2.35    2.30
   3   2  15    2.27    2.57
   3  -2  16   30.14    4.23
   3   2  16   37.63    4.54
   3  -2  17    1.71    2.02
   3   2  17    4.01    2.28
   3  -2  18   -0.44    1.95
   3   2  18    0.39    1.98
   3  -2  19    1.14    2.17
   3   2  19    0.56    2.11
   3  -2  20   -2.44    2.82
   3   2  20    3.17    3.20
   3  -2  21   -0.18    3.02
   3   2  21    0.65    2.34
   3  -2  22   -1.24    2.35
   3   2  22   -0.79    3.01
   3  -2  23   -0.51    2.43
   3   2  23    2.39    2.53
  -3  -3  25   -0.69    3.16
  -3   3  25   -1.10    2.42
  -3  -3  24   -0.20    2.15
  -3   3  24    3.07    2.55
  -3  -3  23    0.56    2.11
  -3   3  23    1.71    2.85
  -3  -3  22   12.85    3.45
  -3   3  22   16.06    4.01
  -3  -3  21    5.90    2.60
  -3   3  21    3.45    2.43
  -3  -3  20    5.93    2.43
  -3   3  20    8.22    2.73
  -3  -3  19   -0.16    1.65
  -3   3  19    0.22    1.71
  -3  -3  18    5.71    2.22
  -3   3  18    2.50    1.91
  -3  -3  17   -0.42    1.55
  -3   3  17   -0.11    1.60
  -3  -3  16   79.40    5.75
  -3   3  16   73.88    5.90
  -3  -3  15    3.11    1.67
  -3   3  15    1.31    2.24
  -3  -3  14   69.14    4.80
  -3   3  14   72.00    5.13
  -3  -3  13    5.74    1.68
  -3   3  13    6.24    1.90
  -3  -3  12  151.45    6.45
  -3   3  12  167.31    7.17
  -3  -3  11   10.75    1.98
  -3   3  11   13.39    2.48
  -3  -3  10  196.01    6.57
  -3   3  10  190.38    6.76
  -3  -3   9  160.43    5.50
  -3   3   9  152.39    5.79
  -3  -3   8   26.30    2.14
  -3   3   8   23.05    2.39
  -3  -3   7    1.16    0.94
  -3   3   7    1.72    0.96
  -3  -3   6  109.83    3.64
  -3   3   6  112.23    4.32
  -3  -3   5   53.15    2.37
  -3   3   5   54.97    2.86
  -3  -3   4   34.82    1.66
  -3   3   4   34.84    2.19
  -3  -3   3  214.93    3.68
  -3   3   3  223.88    5.24
  -3   3   2   26.42    1.96
  -3   3   1  185.11    4.83
  -3   3   0  143.45    4.35
   3   3   0  127.10    2.77
  -3   3  -1  124.08    4.13
   3   3   1  114.19    3.01
   3  -3   2  189.99    5.44
   3   3   2  189.86    4.26
   3  -3   3    0.88    0.84
   3   3   3    0.10    0.76
   3  -3   4  193.37    5.91
   3   3   4  188.50    5.16
   3  -3   5   60.30    3.58
   3   3   5   52.96    2.99
   3  -3   6   16.22    2.19
   3   3   6   17.06    2.21
   3  -3   7   36.95    3.21
   3   3   7   37.81    2.92
   3  -3   8    5.57    1.59
   3   3   8    4.65    1.43
   3  -3   9    6.76    2.19
   3   3   9    6.19    1.70
   3  -3  10   84.81    5.42
   3   3  10   77.38    4.79
   3  -3  11   -0.46    1.36
   3   3  11   -1.15    1.76
   3  -3  12   26.02    3.33
   3   3  12   17.39    2.72
   3  -3  13   -1.05    1.48
   3   3  13    1.28    1.52
   3  -3  14   48.19    4.97
   3   3  14   36.76    4.30
   3  -3  15    3.39    2.26
   3   3  15    5.67    2.31
   3  -3  16   29.73    4.25
   3   3  16   36.25    4.60
   3  -3  17    1.85    2.15
   3   3  17    2.31    2.14
   3  -3  18    7.65    3.34
   3   3  18    5.95    3.02
   3  -3  19   -0.47    2.67
   3   3  19   -0.26    2.04
   3  -3  20   11.37    3.80
   3   3  20   10.95    3.79
   3  -3  21    1.31    2.50
   3   3  21    2.57    2.53
   3  -3  22   -0.60    2.50
   3   3  22   -0.70    2.93
   3  -3  23    1.44    2.81
   3   3  23   -0.70    2.36
  -3  -4  25    3.01    3.48
  -3   4  25    1.46    2.62
  -3  -4  24   -2.33    2.76
  -3   4  24    2.02    2.52
  -3  -4  23    0.83    2.05
  -3   4  23   -0.99    2.58
  -3  -4  22    0.92    2.11
  -3   4  22    0.80    2.03
  -3  -4  21    6.26    2.58
  -3   4  21    4.27    2.48
  -3  -4  20   21.20    3.69
  -3   4  20   18.96    3.96
  -3  -4  19    0.17    1.71
  -3   4  19   -0.42    1.71
  -3  -4  18    2.99    1.93
  -3   4  18    4.23    2.74
  -3  -4  17    0.36    1.66
  -3   4  17    0.79    2.34
  -3  -4  16    9.44    2.34
  -3   4  16    6.77    2.36
  -3  -4  15   -0.45    1.32
  -3   4  15   -2.11    1.25
  -3  -4  14   29.57    3.50
  -3   4  14   28.74    3.61
  -3  -4  13   17.51    2.46
  -3   4  13   21.04    2.85
  -3  -4  12   84.54    4.95
  -3   4  12   82.91    5.16
  -3  -4  11   23.18    2.59
  -3   4  11   21.61    2.73
  -3  -4  10  285.65    7.87
  -3   4  10  266.95    8.18
  -3  -4   9   36.05    2.70
  -3   4   9   34.59    3.11
  -3  -4   8   20.31    2.02
  -3   4   8   22.29    2.28
  -3  -4   7   30.81    2.10
  -3   4   7   33.35    2.64
  -3  -4   6  174.42    4.49
  -3   4   6  179.60    5.53
  -3  -4   5   77.12    2.68
  -3   4   5   76.24    3.42
  -3  -4   4   40.42    1.69
  -3   4   4   36.96    2.46
  -3   4   3    5.92    1.10
  -3   4   2    9.91    1.35
  -3   4   1  183.33    4.94
  -3   4   0   26.16    2.02
  -3   4  -1  198.21    5.41
   3   4   1  180.78    3.56
  -3   4  -2  384.43    7.90
   3   4   2  391.91    6.18
   3  -4   3   18.53    2.12
   3   4   3   18.18    1.51
   3  -4   4   14.17    1.85
   3   4   4   14.53    1.52
   3  -4   5  334.63    8.39
   3   4   5  311.09    7.04
   3  -4   6   72.27    4.37
   3   4   6   68.80    3.67
   3  -4   7  112.07    5.28
   3   4   7  111.93    4.84
   3  -4   8   -0.49    1.06
   3   4   8   -0.58    0.84
   3  -4   9    4.44    2.02
   3   4   9    4.43    1.56
   3  -4  10    3.74    2.08
   3   4  10   -0.28    1.74
   3  -4  11   -0.78    1.89
   3   4  11    0.65    1.46
   3  -4  12   13.45    2.65
   3   4  12   14.51    2.87
   3  -4  13    1.22    1.76
   3   4  13    1.78    1.58
   3  -4  14    2.79    1.94
   3   4  14    3.82    2.38
   3   4  15   12.58    2.85
   3  -4  16   12.95    3.68
   3   4  16   12.79    2.94
   3  -4  17    3.58    3.05
   3   4  17    6.50    2.99
   3  -4  18    6.68    3.34
   3   4  18   11.62    3.10
   3  -4  19    0.05    2.92
   3   4  19    0.78    2.73
   3  -4  20    3.00    2.57
   3   4  20    3.71    2.50
   3  -4  21   -1.21    2.24
   3   4  21    2.70    3.17
   3  -4  22    0.34    2.52
   3   4  22   -1.87    2.15
   3  -4  23    0.92    2.62
   3   4  23   -0.44    3.20
  -3  -5  25    4.50    3.56
  -3   5  25    0.57    2.59
  -3  -5  24    1.46    3.08
  -3   5  24    2.99    3.21
  -3  -5  23    1.60    2.29
  -3   5  23    1.83    2.86
  -3  -5  22    0.07    2.00
  -3   5  22   -1.80    1.80
  -3  -5  21    2.68    2.15
  -3   5  21    5.08    2.57
  -3  -5  20    0.45    1.88
  -3   5  20   -0.95    1.80
  -3  -5  19    5.08    2.66
  -3   5  19    6.34    2.96
  -3  -5  18    6.83    2.60
  -3   5  18    8.02    2.57
  -3  -5  17   19.36    3.44
  -3   5  17   22.23    3.49
  -3  -5  16    2.48    2.20
  -3   5  16    2.11    1.88
  -3  -5  15   24.53    3.43
  -3   5  15   22.93    3.28
  -3  -5  14    4.01    1.68
  -3   5  14    3.01    1.72
  -3  -5  13   19.02    2.59
  -3   5  13   19.50    2.78
  -3  -5  12    3.64    1.87
  -3   5  12    1.47    1.48
  -3  -5  11  286.05    8.39
  -3   5  11  279.66    8.93
  -3  -5  10   93.64    4.64
  -3   5  10   92.05    5.07
  -3  -5   9   53.38    3.38
  -3   5   9   53.96    3.69
  -3  -5   8   69.35    3.43
  -3   5   8   75.66    4.15
  -3  -5   7   15.03    1.63
  -3   5   7   14.61    1.86
  -3  -5   6   81.78    3.10
  -3   5   6   80.94    3.87
  -3  -5   5   96.97    2.92
  -3   5   5  100.33    4.14
  -3  -5   4  234.67    4.05
  -3   5   4  223.36    5.80
  -3   5   3  158.65    4.81
  -3   5   2  208.72    5.52
  -3   5   1  107.76    3.96
  -3   5   0   55.16    3.00
  -3   5  -1  610.57   10.04
   3   5   1  591.94    6.96
  -3   5  -2  351.48    7.74
   3   5   2  361.22    5.84
   3  -5   3   51.85    3.17
   3   5   3   67.90    2.75
   3  -5   4    2.79    1.21
   3   5   4    1.70    0.78
   3  -5   5  416.58    9.65
   3   5   5  424.43    8.35
   3  -5   6  263.31    7.99
   3   5   6  252.59    6.82
   3  -5   7   21.57    2.78
   3   5   7   22.06    2.47
   3  -5   8    1.18    1.17
   3   5   8    2.08    1.11
   3  -5   9    9.53    2.27
   3   5   9    8.75    2.06
   3  -5  10    1.89    1.47
   3   5  10    1.04    1.34
   3  -5  11   23.40    3.21
   3   5  11   22.26    2.88
   3  -5  12    1.49    2.36
   3   5  12    1.45    1.92
   3  -5  13   17.97    3.15
   3   5  13   14.85    2.60
   3  -5  14    0.69    2.50
   3   5  14    3.00    1.83
   3  -5  15   48.05    4.99
   3   5  15   44.97    4.80
   3  -5  16    1.19    2.18
   3   5  16    1.81    2.03
   3  -5  17    6.03    2.61
   3   5  17    5.66    2.40
   3  -5  18   -0.60    1.97
   3   5  18   -0.20    2.46
   3  -5  19    6.76    2.85
   3   5  19    3.35    2.48
   3  -5  20    4.35    2.72
   3   5  20    3.88    2.96
   3  -5  21    1.20    2.49
   3   5  21    3.43    3.13
   3  -5  22    0.96    2.69
   3   5  22    0.39    2.43
   3  -5  23    0.35    2.59
   3   5  23    2.56    3.33
  -3  -6  25    5.00    3.07
  -3   6  25    7.88    3.35
  -3  -6  24   -0.09    2.85
  -3   6  24   -1.84    2.81
  -3  -6  23    0.54    2.62
  -3   6  23    1.41    2.33
  -3  -6  22    0.43    2.03
  -3   6  22    0.05    2.06
  -3  -6  21   14.21    3.33
  -3   6  21   16.75    4.04
  -3  -6  20    4.57    2.78
  -3   6  20    3.49    2.32
  -3  -6  19   27.30    4.17
  -3   6  19   21.74    3.72
  -3  -6  18    0.86    2.24
  -3   6  18    0.76    2.41
  -3  -6  17   11.51    2.61
  -3   6  17   13.03    3.20
  -3  -6  16    0.38    1.44
  -3   6  16   -0.53    2.13
  -3  -6  15    9.51    2.26
  -3   6  15    7.70    2.67
  -3  -6  14    7.54    1.98
  -3   6  14    8.41    2.20
  -3  -6  13   34.55    3.51
  -3   6  13   31.26    3.45
  -3  -6  12   47.89    3.78
  -3   6  12   35.07    3.51
  -3  -6  11  146.99    5.99
  -3   6  11  132.42    6.28
  -3  -6  10    5.95    1.50
  -3   6  10    3.60    1.56
  -3  -6   9  230.02    6.56
  -3   6   9  233.06    7.64
  -3  -6   8    5.68    1.35
  -3   6   8    5.34    1.47
  -3  -6   7    6.79    1.22
  -3   6   7    5.02    1.35
  -3  -6   6   45.07    2.27
  -3   6   6   41.37    2.98
  -3  -6   5  164.14    3.81
  -3   6   5  159.10    5.25
  -3  -6   4    2.16    0.59
  -3   6   4    2.18    0.98
  -3   6   3    1.65    0.91
  -3   6   2   35.60    2.54
  -3   6   1   31.74    2.31
  -3   6   0    1.67    0.96
  -3   6  -1  101.60    4.11
   3   6   1  114.37    2.74
  -3   6  -2    7.53    1.45
   3   6   2    4.40    0.89
   3  -6   3   29.75    2.53
   3   6   3   33.91    2.04
   3  -6   4   38.24    2.89
   3   6   4   44.53    2.53
   3  -6   5   77.45    4.26
   3   6   5   73.99    3.39
   3  -6   6  194.41    6.98
   3   6   6  189.90    5.79
   3  -6   7    0.63    1.60
   3   6   7   -1.39    0.81
   3  -6   8    6.44    1.70
   3   6   8    6.72    1.50
   3  -6   9   11.77    2.46
   3   6   9   11.87    2.04
   3  -6  10    1.63    1.47
   3   6  10    0.79    1.68
   3  -6  11    5.28    1.97
   3   6  11    2.25    1.97
   3  -6  12    3.67    1.95
   3   6  12    1.73    1.48
   3  -6  13   -1.67    2.18
   3   6  13    0.09    1.35
   3  -6  14   15.22    3.09
   3   6  14   10.51    2.58
   3  -6  15    0.23    2.60
   3   6  15    0.57    1.61
   3  -6  16   11.56    3.10
   3   6  16   10.40    3.24
   3  -6  17   17.32    3.67
   3   6  17   16.40    3.28
   3  -6  18    2.34    2.45
   3   6  18    0.74    2.02
   3  -6  19    7.00    3.03
   3   6  19    8.87    3.37
   3  -6  20    0.02    2.29
   3   6  20    0.64    2.74
   3  -6  21    2.51    2.76
   3   6  21    1.37    2.48
   3  -6  22   -0.63    2.30
   3   6  22   -1.29    2.83
   3  -6  23   -1.51    2.40
   3   6  23   -2.01    3.00
  -3  -7  25    4.35    3.01
  -3   7  25    4.31    3.18
  -3  -7  24    0.17    2.89
  -3   7  24    1.43    3.24
  -3  -7  23   -0.59    2.71
  -3   7  23    2.03    2.30
  -3  -7  22    1.50    2.10
  -3   7  22   -0.22    2.59
  -3  -7  21    0.89    1.94
  -3   7  21   -0.66    1.93
  -3  -7  20    3.55    2.69
  -3   7  20    2.33    2.84
  -3  -7  19    6.47    2.84
  -3   7  19    7.37    2.67
  -3  -7  18    4.53    2.14
  -3   7  18    2.37    2.04
  -3  -7  17   12.95    2.73
  -3   7  17   13.99    3.00
  -3  -7  16    3.96    1.87
  -3   7  16    4.32    2.20
  -3  -7  15    0.84    1.95
  -3   7  15   -0.49    1.60
  -3  -7  14   -1.07    1.62
  -3   7  14   -0.19    1.47
  -3  -7  13    1.18    1.56
  -3   7  13    1.75    1.95
  -3  -7  12   21.64    2.72
  -3   7  12   18.83    2.98
  -3  -7  11   70.49    4.27
  -3   7  11   77.65    4.88
  -3  -7  10  123.36    5.22
  -3   7  10  119.83    5.86
  -3  -7   9  241.23    6.71
  -3   7   9  244.90    8.11
  -3  -7   8    2.30    1.18
  -3   7   8    3.20    1.33
  -3  -7   7   87.63    3.46
  -3   7   7   92.72    4.54
  -3  -7   6    0.85    0.89
  -3   7   6    1.25    0.99
  -3  -7   5  112.77    3.11
  -3   7   5   95.47    4.23
  -3  -7   4    8.48    0.81
  -3   7   4    8.47    1.41
  -3   7   3  207.92    5.91
  -3   7   2  152.97    5.08
  -3   7   1  522.66    9.54
  -3   7   0   16.02    1.83
  -3   7  -1  282.31    7.09
   3   7   1  303.85    4.67
  -3   7  -2  102.17    4.41
   3   7   2  102.09    2.97
   3  -7   3  326.17    8.19
   3   7   3  317.64    6.01
   3  -7   4  371.88    9.19
   3   7   4  364.59    7.07
   3  -7   5  160.64    6.22
   3   7   5  147.77    4.85
   3  -7   6  129.47    5.83
   3   7   6  117.35    4.59
   3  -7   7  114.78    5.77
   3   7   7  100.11    4.60
   3  -7   8    7.53    1.84
   3   7   8    5.23    1.65
   3  -7   9   19.46    2.70
   3   7   9   21.88    2.49
   3  -7  10    2.55    1.56
   3   7  10    3.19    1.43
   3  -7  11   15.94    3.10
   3   7  11   17.41    2.63
   3  -7  12   -1.36    2.06
   3   7  12    0.61    1.43
   3  -7  13   12.56    2.82
   3   7  13   14.27    2.62
   3  -7  14   25.67    3.83
   3   7  14   24.42    3.37
   3  -7  15    2.80    2.38
   3   7  15    2.06    1.89
   3  -7  16    2.80    2.87
   3   7  16    2.33    1.86
   3  -7  17    2.67    2.50
   3   7  17    5.32    2.83
   3  -7  18   -0.80    2.24
   3   7  18    1.55    2.44
   3  -7  19    5.37    2.85
   3   7  19    6.03    2.62
   3  -7  20    4.90    2.91
   3   7  20    2.88    2.43
   3  -7  21    5.88    3.08
   3   7  21    6.11    3.47
   3  -7  22   -0.08    2.47
   3   7  22    1.38    3.02
   3  -7  23    2.04    2.70
   3   7  23    1.04    2.68
  -3  -8  25   -0.06    2.15
  -3   8  25    1.07    3.16
  -3  -8  24    0.98    2.32
  -3   8  24    4.85    3.44
  -3  -8  23    4.19    3.07
  -3   8  23    0.36    2.20
  -3  -8  22   -0.21    1.87
  -3   8  22   -0.57    2.72
  -3  -8  21    0.61    1.83
  -3   8  21    1.05    2.20
  -3  -8  20   30.11    4.55
  -3   8  20   30.12    4.57
  -3  -8  19    1.18    2.33
  -3   8  19    3.65    2.89
  -3  -8  18   22.31    3.55
  -3   8  18   25.10    4.26
  -3  -8  17    7.44    2.70
  -3   8  17    8.48    3.09
  -3  -8  16    2.95    2.17
  -3   8  16   -0.72    2.30
  -3  -8  15   17.85    3.07
  -3   8  15   19.41    3.23
  -3  -8  14    4.93    1.79
  -3   8  14    4.89    2.34
  -3  -8  13   19.96    2.61
  -3   8  13   26.38    3.45
  -3  -8  12   72.91    4.57
  -3   8  12   64.35    4.82
  -3  -8  11   15.07    2.36
  -3   8  11   12.41    2.35
  -3  -8  10   92.56    4.56
  -3   8  10   90.33    5.29
  -3  -8   9   29.78    2.61
  -3   8   9   31.23    3.09
  -3  -8   8   53.87    3.05
  -3   8   8   50.40    3.63
  -3  -8   7   51.33    2.71
  -3   8   7   47.40    3.36
  -3  -8   6   99.50    3.34
  -3   8   6   92.05    4.40
  -3  -8   5   52.13    2.20
  -3   8   5   47.45    3.23
  -3  -8   4   49.53    1.79
  -3   8   4   48.06    3.03
  -3   8   3   68.45    3.48
  -3   8   2   89.71    3.99
  -3   8   1   23.07    2.15
  -3   8   0   49.48    3.14
  -3   8  -1    9.08    1.56
   3   8   1    8.04    0.94
  -3   8  -2   39.74    3.03
   3   8   2   42.34    2.01
  -3   8  -3   20.55    2.28
   3   8   3   20.88    1.68
   3  -8   4   26.11    2.83
   3   8   4   25.21    1.94
   3  -8   5    5.24    1.63
   3   8   5    5.04    1.38
   3  -8   6    3.26    1.76
   3   8   6    4.82    1.30
   3  -8   7    6.45    2.07
   3  -8   8   38.96    3.63
   3   8   8   31.74    2.96
   3  -8   9    9.43    2.19
   3   8   9    9.30    1.88
   3  -8  10    3.16    2.05
   3   8  10    2.57    1.76
   3  -8  11   -0.94    1.38
   3   8  11    0.39    1.30
   3  -8  12    0.95    1.66
   3   8  12    0.95    1.36
   3  -8  13    4.00    2.12
   3   8  13    0.70    1.44
   3  -8  14    8.16    3.05
   3   8  14    3.68    1.92
   3  -8  15   -1.16    1.77
   3   8  15   -0.69    1.46
   3  -8  16   14.43    3.77
   3   8  16   10.25    2.66
   3  -8  17    0.57    2.16
   3   8  17    2.51    1.94
   3  -8  18   17.82    3.85
   3   8  18   11.69    3.10
   3  -8  19    2.33    2.64
   3   8  19   -1.95    2.47
   3  -8  20    5.26    2.88
   3   8  20    4.54    3.14
   3  -8  21    1.08    2.48
   3   8  21   -1.76    2.69
   3  -8  22   -0.79    2.33
   3   8  22    1.03    2.57
  -3  -9  25   -0.42    3.20
  -3   9  25    2.97    3.31
  -3  -9  24   -0.67    2.20
  -3   9  24    2.37    2.60
  -3  -9  23   -1.70    2.74
  -3   9  23   -0.09    2.19
  -3  -9  22   -0.52    2.54
  -3   9  22   -1.21    2.03
  -3  -9  21   -0.17    1.85
  -3   9  21    0.91    2.85
  -3  -9  20    3.26    2.72
  -3   9  20    3.71    2.48
  -3  -9  19    4.47    2.16
  -3   9  19    2.69    2.28
  -3  -9  18   12.62    2.93
  -3   9  18   12.68    3.04
  -3  -9  17   -1.00    2.06
  -3   9  17    0.09    1.87
  -3  -9  16    9.79    2.38
  -3   9  16    9.38    2.66
  -3  -9  15   -0.70    1.30
  -3   9  15   -0.73    1.54
  -3  -9  14   -1.73    1.61
  -3   9  14   -1.48    1.87
  -3  -9  13    7.27    1.80
  -3   9  13    5.33    1.91
  -3  -9  12   49.85    3.73
  -3   9  12   50.75    4.42
  -3  -9  11   54.46    3.80
  -3   9  11   56.34    4.46
  -3  -9  10  148.68    5.61
  -3   9  10  152.75    6.87
  -3  -9   9    4.82    1.55
  -3   9   9    4.11    1.61
  -3  -9   8  210.71    5.94
  -3   9   8  201.96    7.25
  -3  -9   7   24.82    2.03
  -3   9   7   23.19    2.68
  -3  -9   6  234.16    5.26
  -3   9   6  219.84    6.99
  -3  -9   5    0.24    0.70
  -3   9   5    0.50    0.96
  -3  -9   4  121.96    2.83
  -3   9   4  114.61    4.75
  -3   9   3   16.76    2.04
  -3   9   2  243.24    6.75
  -3   9   1   39.64    2.81
  -3   9   0  556.58   10.53
  -3   9  -1   55.18    3.33
   3   9   1   59.82    2.05
  -3   9  -2  249.90    7.25
   3   9   2  253.60    4.98
  -3   9  -3    5.88    1.50
   3   9   3    6.43    1.08
   3  -9   4  266.69    8.01
   3   9   4  320.93    6.73
   3  -9   5  157.92    6.20
   3   9   5  158.01    5.11
   3  -9   6  150.56    6.37
   3   9   6  167.28    5.57
   3  -9   7   45.58    3.75
   3   9   7   47.38    3.32
   3  -9   8   47.62    4.03
   3   9   8   47.84    3.58
   3  -9   9   31.82    3.50
   3   9   9   36.75    3.21
   3  -9  10   41.48    3.99
   3   9  10   37.71    3.41
   3  -9  11    7.78    2.59
   3   9  11    6.67    1.82
   3  -9  12   19.47    3.59
   3   9  12   18.90    3.00
   3  -9  13    8.97    3.13
   3   9  13    0.09    1.35
   3  -9  14   14.56    3.16
   3   9  14   15.61    2.81
   3  -9  15   -0.78    1.84
   3   9  15   -0.80    1.50
   3  -9  16   17.59    3.94
   3   9  16    9.75    2.66
   3  -9  17   14.44    3.85
   3   9  17   13.60    3.07
   3  -9  18    9.38    3.27
   3   9  18    6.52    2.66
   3  -9  19    2.78    2.60
   3   9  19    2.42    2.34
   3  -9  20   14.41    3.75
   3   9  20   12.39    3.37
   3  -9  21    0.86    3.07
   3   9  21   -1.47    2.20
   3  -9  22    5.90    3.72
   3   9  22    6.40    3.02
  -3 -10  25    0.06    3.16
  -3  10  25   -0.14    3.19
  -3 -10  24    1.62    3.10
  -3  10  24    3.11    2.85
  -3 -10  23    0.08    2.19
  -3  10  23   -1.31    2.82
  -3 -10  22    3.39    2.91
  -3  10  22    5.16    2.70
  -3 -10  21    4.91    2.45
  -3  10  21    4.54    3.00
  -3 -10  20    4.59    2.73
  -3  10  20    1.86    2.80
  -3 -10  19   14.24    3.15
  -3  10  19   15.62    3.36
  -3 -10  18   10.13    3.08
  -3  10  18    6.16    2.45
  -3 -10  17   -1.08    2.00
  -3  10  17    0.22    2.33
  -3 -10  16   22.09    3.22
  -3  10  16   20.42    3.42
  -3 -10  15   -2.25    1.71
  -3  10  15    0.56    1.71
  -3 -10  14   21.41    2.89
  -3  10  14   22.83    3.36
  -3 -10  13    3.04    1.82
  -3  10  13    1.86    1.69
  -3 -10  12    9.01    1.86
  -3  10  12    8.75    2.50
  -3 -10  11   48.30    3.63
  -3  10  11   52.29    4.34
  -3 -10  10    0.26    1.41
  -3  10  10    1.16    1.87
  -3 -10   9   34.36    2.80
  -3  10   9   32.87    3.27
  -3 -10   8   83.51    3.83
  -3  10   8   77.29    4.75
  -3 -10   7    2.63    1.11
  -3  10   7    2.43    1.34
  -3 -10   6    0.39    0.83
  -3  10   6    1.31    1.18
  -3 -10   5   81.00    2.74
  -3  10   5   75.75    4.08
  -3 -10   4    5.18    0.82
  -3  10   4    5.34    1.39
  -3  10   3   13.58    1.81
  -3  10   2   59.24    3.47
  -3  10   1    5.25    1.34
  -3  10   0  142.32    5.37
   3  10   0  150.42    2.99
  -3  10  -1   31.72    2.64
   3  10   1   35.24    1.71
  -3  10  -2   16.09    2.10
   3  10   2   18.75    1.51
  -3  10  -3   19.65    2.52
   3  10   3   19.40    1.71
   3 -10   4    1.21    1.24
   3  10   4    3.95    1.18
   3 -10   5    1.80    1.67
   3  10   5    1.57    1.19
   3 -10   6   12.20    2.21
   3  10   6    8.85    1.50
   3 -10   7   16.73    2.49
   3  10   7   15.80    1.98
   3 -10   8   46.83    4.06
   3  10   8   52.07    3.57
   3 -10   9   39.55    3.89
   3  10   9   34.02    3.27
   3 -10  10    1.96    2.22
   3  10  10    2.97    1.46
   3 -10  11    6.47    2.12
   3  10  11    4.52    1.64
   3 -10  12    0.90    1.69
   3  10  12    0.01    1.75
   3 -10  13    2.07    1.91
   3  10  13    0.07    1.38
   3 -10  14    4.91    2.46
   3  10  14    6.99    2.24
   3 -10  15   -0.14    2.03
   3  10  15    0.63    2.26
   3 -10  16    1.53    2.13
   3  10  16    4.84    2.72
   3 -10  17   11.46    3.79
   3  10  17    8.86    3.12
   3 -10  18    2.88    2.76
   3  10  18    2.85    2.81
   3 -10  19    3.10    2.62
   3  10  19    3.46    2.98
   3 -10  20    0.82    3.29
   3  10  20    2.51    3.11
   3 -10  21    5.49    3.70
   3  10  21    1.25    3.23
   3 -10  22    2.74    3.52
   3  10  22    4.07    3.71
  -3 -11  24   -1.76    3.07
  -3  11  24    2.77    2.74
  -3 -11  23   -0.43    2.00
  -3  11  23    0.08    3.02
  -3 -11  22    1.08    2.78
  -3  11  22    4.52    2.71
  -3 -11  21    2.68    2.25
  -3  11  21    0.62    2.18
  -3 -11  20   18.06    3.90
  -3  11  20   18.17    3.82
  -3 -11  19    0.66    1.80
  -3  11  19    0.67    2.02
  -3 -11  18    6.25    2.74
  -3  11  18    5.93    2.46
  -3 -11  17    8.46    2.47
  -3  11  17    5.09    2.30
  -3 -11  16    1.09    2.13
  -3 -11  15    1.83    1.57
  -3 -11  14   11.81    2.67
  -3  11  14    9.53    2.56
  -3 -11  13   22.71    2.79
  -3  11  13   14.91    2.88
  -3 -11  12   -1.09    1.36
  -3  11  12   -1.21    1.75
  -3 -11  11   63.54    4.17
  -3  11  11   65.16    4.82
  -3 -11  10   10.47    2.06
  -3  11  10   13.25    2.70
  -3 -11   9   60.52    3.53
  -3  11   9   62.21    4.43
  -3 -11   8   68.90    3.47
  -3  11   8   69.52    4.50
  -3 -11   7  122.43    4.24
  -3  11   7  120.00    5.62
  -3 -11   6  153.28    4.33
  -3  11   6  158.40    6.22
  -3 -11   5  163.40    4.00
  -3  11   5  149.30    5.85
  -3 -11   4   30.28    1.56
  -3  11   4   28.73    2.76
  -3 -11   3  119.78    2.63
  -3  11   3  106.79    4.72
  -3  11   2   18.21    2.30
  -3  11   1  288.11    7.84
  -3  11   0    4.91    1.66
   3  11   0    7.62    0.86
  -3  11  -1  205.25    6.65
   3  11   1  230.60    4.52
  -3  11  -2   12.56    1.96
   3  11   2   12.52    1.35
  -3  11  -3  367.53    9.54
   3  11   3  367.04    6.91
   3 -11   4   22.59    2.79
   3  11   4   23.07    2.05
   3 -11   5  161.42    6.65
   3  11   5  166.27    5.38
   3 -11   6   16.21    2.57
   3  11   6   16.31    1.92
   3 -11   7   71.90    4.91
   3  11   7   75.76    4.15
   3 -11   8  192.61    7.94
   3  11   8  196.75    6.87
   3 -11   9   56.06    4.85
   3  11   9   52.13    3.90
   3 -11  10   74.17    5.39
   3  11  10   64.55    4.49
   3 -11  11   14.70    2.73
   3  11  11    9.91    2.36
   3 -11  12    2.37    1.84
   3  11  12    1.51    1.52
   3 -11  13    7.15    2.59
   3  11  13    7.76    2.54
   3 -11  14    2.31    2.21
   3  11  14   -1.11    1.54
   3 -11  15   43.44    5.43
   3  11  15   31.92    4.24
   3 -11  16   11.04    3.24
   3  11  16   10.84    3.10
   3 -11  17    5.73    3.54
   3  11  17    6.83    2.56
   3 -11  18   30.19    4.72
   3  11  18   28.16    4.31
   3 -11  19    6.57    3.15
   3  11  19    6.46    2.77
   3 -11  20    3.21    3.60
   3  11  20    2.34    2.47
   3 -11  21    2.52    3.56
   3  11  21    3.43    2.69
   3 -11  22    7.45    3.38
   3  11  22    8.24    3.25
  -3 -12  24   -2.30    1.96
  -3  12  24   -0.15    2.51
  -3 -12  23    5.77    3.29
  -3  12  23    9.61    3.47
  -3 -12  22   -1.42    2.64
  -3  12  22   -1.10    2.84
  -3 -12  21    3.33    2.84
  -3  12  21    2.39    2.40
  -3 -12  20    5.39    3.05
  -3  12  20    6.69    2.84
  -3 -12  19    2.64    2.10
  -3  12  19   -0.26    1.97
  -3 -12  18   -0.52    2.17
  -3  12  18   -0.01    1.88
  -3 -12  17   16.61    2.94
  -3  12  17   24.82    4.25
  -3 -12  16    3.92    2.31
  -3  12  16    4.40    2.29
  -3 -12  15   30.29    3.55
  -3  12  15   29.75    4.07
  -3 -12  14    1.89    1.59
  -3  12  14    2.86    2.45
  -3 -12  13    3.43    2.01
  -3  12  13    1.22    1.75
  -3 -12  12   -0.66    1.46
  -3  12  12   -0.13    1.36
  -3 -12  11    2.72    1.67
  -3  12  11    5.34    1.89
  -3 -12  10   74.92    4.21
  -3  12  10   78.43    5.32
  -3 -12   9    8.94    1.71
  -3  12   9    7.78    1.90
  -3 -12   8   18.70    2.05
  -3  12   8   22.94    2.80
  -3 -12   7   22.83    2.07
  -3  12   7   21.41    2.65
  -3 -12   6   25.80    1.92
  -3  12   6   25.37    2.78
  -3 -12   5    0.89    0.89
  -3  12   5    1.66    1.59
  -3 -12   4   54.24    2.19
  -3  12   4   56.87    3.67
  -3 -12   3   79.31    2.31
  -3  12   3   72.63    4.12
  -3  12   2   13.26    2.13
  -3  12   1  198.74    6.60
   3  12  -1  196.84    3.56
  -3  12   0   10.60    2.00
   3  12   0   10.65    1.04
  -3  12  -1  182.07    6.40
   3  12   1  195.59    4.29
  -3  12  -2    7.13    1.67
   3  12   2    7.56    1.19
  -3  12  -3   40.31    3.31
   3  12   3   43.59    2.54
  -3  12  -4   13.09    2.18
   3  12   4   16.93    1.82
   3 -12   5    5.20    1.96
   3  12   5    5.44    1.41
   3 -12   6    0.37    1.17
   3  12   6   -0.35    1.12
   3 -12   7   57.77    4.37
   3  12   7   58.92    3.86
   3 -12   8   78.07    5.23
   3  12   8   70.60    4.25
   3 -12   9   34.76    3.85
   3  12   9   32.97    3.34
   3 -12  10    2.16    1.84
   3  12  10    2.78    1.78
   3 -12  11    1.96    2.20
   3  12  11    0.04    1.31
   3 -12  12    3.59    1.95
   3  12  12    1.22    1.89
   3 -12  13   12.38    2.93
   3  12  13   12.91    2.82
   3 -12  14   16.69    3.36
   3  12  14   15.25    2.89
   3 -12  15   17.88    4.06
   3  12  15   16.27    3.46
   3 -12  16    5.16    2.73
   3  12  16    3.03    2.12
   3 -12  17    4.64    2.82
   3  12  17   -0.73    1.90
   3 -12  18    3.43    2.66
   3  12  18    5.77    3.12
   3 -12  19    1.39    3.41
   3  12  19    2.20    2.85
   3 -12  20   -3.07    3.02
   3  12  20    1.91    2.94
   3 -12  21    3.54    2.80
   3  12  21   -0.50    2.90
   3 -12  22    3.07    2.92
   3  12  22   -2.64    2.83
  -3 -13  24    0.32    2.11
  -3  13  24    0.82    3.66
  -3 -13  23    3.62    3.25
  -3  13  23    5.68    3.27
  -3 -13  22    2.38    2.35
  -3  13  22    4.40    2.84
  -3 -13  21   10.32    3.57
  -3  13  21    7.13    3.70
  -3 -13  20    2.80    2.25
  -3  13  20    2.23    3.23
  -3 -13  19   23.64    4.15
  -3  13  19   26.28    4.78
  -3 -13  18    3.65    2.46
  -3  13  18    4.18    2.57
  -3 -13  17    8.72    2.41
  -3  13  17   13.64    3.35
  -3 -13  16    6.28    2.58
  -3  13  16    5.63    3.05
  -3 -13  15   19.06    3.29
  -3  13  15   19.14    3.83
  -3 -13  14    3.27    2.14
  -3  13  14    4.01    2.11
  -3 -13  13   23.96    2.94
  -3  13  13   25.10    3.90
  -3 -13  12   58.20    4.13
  -3  13  12   60.42    4.98
  -3 -13  11    0.31    1.08
  -3  13  11   -0.36    1.32
  -3 -13  10   34.83    3.02
  -3  13  10   31.87    3.68
  -3 -13   9   29.53    2.63
  -3  13   9   24.66    3.03
  -3 -13   8    7.14    1.51
  -3  13   8    5.80    1.83
  -3 -13   7  136.04    4.58
  -3  13   7  130.07    6.09
  -3 -13   6   15.72    1.69
  -3  13   6   15.53    2.34
  -3 -13   5  352.73    6.29
  -3  13   5  336.71    9.30
  -3 -13   4    0.13    0.77
  -3  13   4   -1.46    1.40
  -3 -13   3   43.15    1.83
  -3  13   3   43.30    3.38
  -3  13   2    5.58    1.51
   3  13  -2    7.02    0.90
  -3  13   1    5.56    1.50
   3  13  -1    4.40    0.79
  -3  13   0   59.48    3.89
   3  13   0   61.78    2.30
  -3  13  -1    7.34    1.94
   3  13   1    4.67    1.02
  -3  13  -2   63.44    4.00
   3  13   2   67.65    2.96
  -3  13  -3   13.90    2.37
   3  13   3   14.88    1.83
  -3  13  -4   65.05    4.30
   3  13   4   71.28    3.49
   3 -13   5    0.95    1.23
   3  13   5    0.78    1.06
   3 -13   6    1.94    1.34
   3  13   6    2.27    1.32
   3 -13   7  133.09    6.65
   3  13   7  136.70    5.77
   3 -13   8    3.89    2.37
   3  13   8    3.89    1.85
   3 -13   9  190.60    8.46
   3  13   9  181.19    7.27
   3 -13  10    8.11    2.32
   3  13  10    4.72    1.72
   3 -13  11   57.48    5.14
   3  13  11   62.02    4.77
   3 -13  12   -0.82    1.49
   3  13  12    0.44    1.81
   3 -13  13   14.09    3.12
   3  13  13   13.88    2.78
   3 -13  14    9.21    2.86
   3  13  14    6.91    2.33
   3 -13  15   13.20    3.80
   3  13  15   11.30    3.17
   3 -13  16   22.51    4.07
   3  13  16   20.32    3.61
   3 -13  17   37.40    5.11
   3  13  17   36.26    4.98
   3 -13  18   -0.48    2.28
   3  13  18    2.19    2.16
   3 -13  19   10.49    4.04
   3  13  19    9.24    3.03
   3 -13  20    1.41    2.63
   3  13  20   -0.58    2.01
   3 -13  21    9.26    3.62
   3  13  21    8.20    3.58
   3 -13  22   -2.05    2.48
   3  13  22    0.73    3.11
  -3 -14  24    9.45    3.70
  -3  14  24    9.29    4.28
  -3 -14  23    0.94    2.29
  -3  14  23    2.69    2.80
  -3 -14  22    3.31    3.07
  -3  14  22    4.34    3.05
  -3 -14  21    1.85    2.91
  -3  14  21    0.96    2.54
  -3 -14  20   -0.46    1.94
  -3  14  20   -0.43    2.30
  -3 -14  19    1.66    2.66
  -3  14  19    0.31    2.21
  -3 -14  18    2.06    2.35
  -3  14  18    1.40    2.28
  -3 -14  17   12.46    2.73
  -3  14  17   10.35    3.47
  -3 -14  16   30.95    4.02
  -3  14  16   35.67    4.55
  -3 -14  15   -1.60    2.01
  -3  14  15   -0.30    1.68
  -3 -14  14    3.33    2.28
  -3  14  14    5.07    2.27
  -3 -14  13    8.23    2.39
  -3  14  13    3.55    2.61
  -3 -14  12    3.87    1.94
  -3  14  12    0.25    1.65
  -3 -14  11    0.58    1.44
  -3  14  11    1.00    1.57
  -3 -14  10   -1.27    1.17
  -3  14  10    3.46    2.27
  -3 -14   9   43.50    3.17
  -3  14   9   39.45    3.79
  -3 -14   8   10.16    1.68
  -3  14   8    9.46    2.14
  -3 -14   7    8.98    1.51
  -3 -14   6   24.03    1.99
  -3  14   6   22.45    2.92
  -3 -14   5   12.86    1.50
  -3  14   5   15.67    2.36
  -3 -14   4    0.82    0.79
  -3  14   4    0.64    1.21
  -3 -14   3   38.92    1.90
  -3  14   3   36.59    3.20
  -3  14   2  139.92    5.85
   3  14  -2  144.95    3.35
  -3  14   1   44.46    3.56
   3  14  -1   44.00    1.95
  -3  14   0  223.29    7.45
   3  14   0  238.04    4.75
  -3  14  -1    2.29    1.33
   3  14   1    2.24    0.90
  -3  14  -2    5.50    1.86
   3  14   2    5.50    1.14
  -3  14  -3   71.30    4.59
   3  14   3   82.07    3.59
  -3  14  -4   17.10    2.47
   3  14   4   15.68    1.86
   3 -14   5    0.26    1.21
   3  14   5   -0.49    1.02
   3 -14   6    4.42    1.64
   3  14   6    6.99    1.71
   3 -14   7   -0.19    1.46
   3  14   7    0.76    1.12
   3 -14   8   55.08    4.80
   3  14   8   60.95    4.21
   3 -14   9   55.72    4.80
   3  14   9   63.64    4.52
   3 -14  10   15.37    3.23
   3  14  10   11.82    2.59
   3 -14  11    2.84    1.94
   3  14  11    1.86    1.53
   3 -14  12    2.17    2.49
   3  14  12    0.55    1.44
   3 -14  13   27.83    3.99
   3  14  13   25.28    3.46
   3 -14  14   18.66    3.55
   3  14  14   14.96    2.96
   3 -14  15    3.37    3.16
   3  14  15    4.39    2.72
   3 -14  16   13.26    4.15
   3  14  16    7.24    2.55
   3 -14  17    8.22    3.23
   3  14  17    5.14    2.94
   3 -14  18    3.41    3.52
   3  14  18    0.89    2.03
   3 -14  19    0.89    2.42
   3  14  19    1.70    2.69
   3 -14  20    1.92    2.81
   3  14  20    3.19    3.03
   3 -14  21    1.41    3.73
   3  14  21    0.62    2.39
   3 -14  22    2.85    3.78
   3  14  22   -0.43    2.31
  -3 -15  24    6.27    3.47
  -3  15  24    3.59    3.02
  -3 -15  23   -2.11    1.88
  -3  15  23    2.59    3.48
  -3 -15  22    6.42    3.47
  -3  15  22    4.61    2.80
  -3 -15  21    5.19    2.68
  -3  15  21    2.13    2.53
  -3 -15  20   21.05    4.08
  -3  15  20   12.43    3.46
  -3 -15  19   -0.75    2.37
  -3  15  19    3.79    3.31
  -3 -15  18   28.15    4.19
  -3  15  18   30.43    5.08
  -3 -15  17    3.23    1.93
  -3  15  17    1.66    2.25
  -3 -15  16   18.09    3.02
  -3  15  16   18.11    3.58
  -3 -15  15    0.23    2.14
  -3  15  15    4.09    2.85
  -3 -15  14   55.62    4.79
  -3  15  14   53.09    5.23
  -3 -15  13   12.38    2.67
  -3  15  13   10.24    2.70
  -3 -15  12   16.18    2.39
  -3  15  12   16.17    3.02
  -3 -15  11   35.52    3.32
  -3  15  11   36.51    3.94
  -3 -15  10    0.49    1.33
  -3  15  10    0.59    1.50
  -3 -15   9    4.56    1.57
  -3  15   9    4.23    1.79
  -3 -15   8   55.12    3.29
  -3  15   8   54.63    4.55
  -3 -15   7    4.80    1.39
  -3  15   7    3.97    1.70
  -3 -15   6   57.22    2.96
  -3  15   6   52.78    4.04
  -3 -15   5   15.86    1.62
  -3  15   5   16.11    2.65
  -3 -15   4  235.38    5.12
  -3  15   4  214.32    7.59
  -3 -15   3  103.24    3.17
  -3  15   3  106.66    5.40
  -3  15   2   10.35    1.94
   3  15  -2   10.04    1.18
  -3  15   1   33.77    3.07
   3  15  -1   35.66    1.90
  -3  15   0   41.55    3.50
   3  15   0   44.86    2.26
  -3  15  -1    5.93    1.66
   3  15   1    4.37    1.10
  -3  15  -2   22.80    2.63
   3  15   2   21.93    1.97
  -3  15  -3   -0.09    1.13
   3  15   3   -0.57    0.90
  -3  15  -4    3.79    1.51
   3  15   4    1.53    1.30
   3 -15   5    0.13    1.18
   3  15   5   -0.27    1.06
   3 -15   6  109.43    5.96
   3  15   6  109.80    4.96
   3 -15   7   25.40    3.20
   3  15   7   32.48    3.11
   3 -15   8  121.99    6.87
   3  15   8  131.37    6.00
   3 -15   9    0.57    2.23
   3  15   9    1.82    1.38
   3 -15  10   90.09    6.36
   3  15  10   84.09    5.29
   3 -15  11    0.70    1.66
   3  15  11    0.22    1.78
   3 -15  12   35.20    4.55
   3  15  12   33.22    3.87
   3 -15  13    3.22    2.24
   3  15  13    3.30    1.85
   3 -15  14   16.91    3.51
   3  15  14   20.21    3.26
   3 -15  15   25.59    4.19
   3  15  15   26.00    4.08
   3 -15  16   37.37    5.47
   3  15  16   29.71    4.37
   3 -15  17    2.15    2.54
   3  15  17    0.41    1.86
   3 -15  18   27.94    5.19
   3  15  18   20.06    4.17
   3 -15  19    1.50    2.42
   3  15  19    3.30    2.31
   3 -15  20    6.34    3.94
   3  15  20    6.08    2.69
   3 -15  21    0.01    3.67
   3  15  21    1.88    3.04
  -3 -16  24    3.92    3.35
  -3  16  24   -0.89    2.62
  -3 -16  23    1.76    3.01
  -3  16  23    1.57    2.73
  -3 -16  22   -1.30    1.88
  -3  16  22   -0.18    3.26
  -3 -16  21    0.82    2.30
  -3  16  21   -1.27    3.03
  -3 -16  20    4.24    2.93
  -3  16  20    1.46    3.11
  -3 -16  19    2.70    2.69
  -3  16  19    0.85    2.26
  -3 -16  18   14.87    3.08
  -3  16  18   13.42    3.44
  -3 -16  17    1.51    1.74
  -3  16  17    0.36    2.58
  -3 -16  16   12.23    2.66
  -3  16  16   17.12    4.00
  -3 -16  15    7.33    2.60
  -3  16  15    8.03    2.70
  -3 -16  14   15.93    3.08
  -3  16  14   13.30    3.56
  -3 -16  13   14.77    2.55
  -3  16  13   11.59    2.96
  -3 -16  12   46.16    3.93
  -3  16  12   46.93    4.94
  -3 -16  11   12.27    2.29
  -3  16  11   10.30    2.46
  -3 -16  10    7.09    1.84
  -3  16  10   10.61    2.44
  -3 -16   9    2.87    1.37
  -3  16   9   -0.12    1.31
  -3 -16   8    1.23    1.18
  -3  16   8    0.13    1.82
  -3 -16   7    3.74    1.21
  -3  16   7    4.33    2.13
  -3 -16   6   64.74    3.23
  -3  16   6   60.44    4.39
  -3 -16   5    0.26    0.94
  -3  16   5    0.80    1.32
  -3 -16   4   74.44    3.02
  -3  16   4   69.87    4.47
  -3  16   3    7.46    1.93
  -3  16   2  311.17    9.15
   3  16  -2  291.26    5.43
  -3  16   1   48.96    3.67
   3  16  -1   51.79    2.33
  -3  16   0   -0.47    1.08
   3  16   0   -0.35    0.87
  -3  16  -1   28.15    2.91
   3  16   1   29.09    2.08
  -3  16  -2   34.82    3.21
   3  16   2   39.78    2.49
  -3  16  -3   -1.52    1.45
   3  16   3   -0.88    0.84
  -3  16  -4   36.27    3.54
   3  16   4   43.30    3.08
   3 -16   5    2.01    1.98
   3  16   5   -0.76    1.14
   3 -16   6    9.85    2.24
   3  16   6   13.15    2.24
   3 -16   7   21.80    3.06
   3  16   7   20.11    2.71
   3 -16   8   23.12    3.60
   3  16   8   24.57    3.01
   3 -16   9    7.12    2.59
   3  16   9    8.26    1.96
   3 -16  10   18.78    3.46
   3  16  10   12.91    2.34
   3 -16  11    0.10    1.66
   3  16  11    0.26    1.32
   3 -16  12   21.65    3.49
   3  16  12   21.44    3.42
   3 -16  13    6.50    2.56
   3  16  13    7.38    2.62
   3 -16  14   11.82    3.13
   3  16  14   10.00    2.55
   3 -16  15   10.07    3.14
   3  16  15    9.49    2.98
   3 -16  16    2.38    2.52
   3  16  16    2.60    2.58
   3 -16  17    0.00    3.20
   3  16  17    0.11    1.87
   3 -16  18    1.73    2.46
   3  16  18    0.20    2.57
   3 -16  19   -2.63    2.92
   3  16  19    1.24    2.14
   3 -16  20   -1.85    3.06
   3  16  20    3.67    2.98
   3 -16  21    0.84    2.71
   3  16  21    1.44    2.34
  -3 -17  23    2.29    2.46
  -3  17  23    1.25    2.73
  -3 -17  22   -0.52    2.03
  -3  17  22   -0.85    2.46
  -3 -17  21    2.39    2.95
  -3  17  21    3.36    2.76
  -3 -17  20   -2.68    2.30
  -3  17  20   -1.22    2.22
  -3 -17  19   22.47    3.69
  -3  17  19   26.20    4.55
  -3 -17  18   15.78    3.24
  -3  17  18   18.09    4.27
  -3 -17  17   24.07    3.61
  -3  17  17   24.01    4.13
  -3 -17  16    1.05    2.23
  -3  17  16    3.83    2.52
  -3 -17  15   14.53    3.17
  -3  17  15    8.98    2.78
  -3 -17  14    0.68    1.70
  -3  17  14    6.08    2.64
  -3 -17  13   64.85    4.87
  -3  17  13   63.99    5.96
  -3 -17  12    4.41    2.02
  -3  17  12    1.14    2.53
  -3 -17  11    5.98    1.98
  -3  17  11    2.07    2.35
  -3 -17  10   10.60    2.10
  -3  17  10    8.78    2.38
  -3 -17   9   17.89    2.27
  -3  17   9   18.87    3.03
  -3 -17   8   64.19    3.60
  -3  17   8   60.39    4.91
  -3 -17   7   11.37    1.63
  -3  17   7    8.98    2.13
  -3 -17   6   10.25    1.65
  -3  17   6   12.12    2.35
  -3 -17   5   26.77    2.11
  -3  17   5   23.69    2.89
  -3 -17   4  202.99    5.09
  -3  17   4  183.33    7.29
  -3  17   3   67.98    4.53
   3  17  -3   66.47    2.84
  -3  17   2  102.32    5.50
   3  17  -2   91.95    3.16
  -3  17   1   33.42    3.35
   3  17  -1   36.97    2.11
  -3  17   0    0.72    1.26
   3  17   0    0.15    0.84
  -3  17  -1    1.23    1.31
   3  17   1    1.44    0.89
  -3  17  -2   15.10    2.56
   3  17   2   15.75    1.76
  -3  17  -3    1.67    1.40
   3  17   3   -0.27    0.96
  -3  17  -4   -0.25    1.14
   3  17   4   -0.54    1.26
   3 -17   5   33.33    3.47
   3  17   5   34.76    2.99
   3 -17   6  111.05    6.26
   3  17   6  123.10    5.68
   3 -17   7   95.92    5.82
   3  17   7   98.53    5.25
   3 -17   8   20.73    3.44
   3  17   8   26.20    3.12
   3 -17   9   47.30    4.52
   3  17   9   61.47    4.63
   3 -17  10    0.54    1.70
   3  17  10    1.23    1.85
   3 -17  11   37.30    4.68
   3  17  11   31.37    3.75
   3 -17  12   28.07    3.98
   3  17  12   29.36    3.61
   3 -17  13   40.04    4.72
   3  17  13   41.41    4.55
   3 -17  14   -0.49    1.93
   3  17  14    3.07    2.44
   3 -17  15   28.51    4.40
   3  17  15   34.43    4.49
   3 -17  16    0.18    2.31
   3  17  16   -0.99    2.23
   3 -17  17   16.78    4.50
   3  17  17   15.02    3.64
   3 -17  18   -0.02    2.34
   3  17  18    2.93    2.25
   3 -17  19    4.74    3.69
   3  17  19    5.55    3.10
   3 -17  20   -0.16    2.43
   3  17  20    1.53    2.30
   3 -17  21    3.42    4.13
   3  17  21    4.64    3.33
  -3  18  23    1.49    3.56
  -3 -18  22   -4.95    2.36
  -3  18  22   -1.84    2.28
  -3 -18  21    0.18    2.70
  -3  18  21    0.84    2.35
  -3 -18  20   -0.33    1.87
  -3  18  20   -1.37    3.07
  -3 -18  19   13.19    3.43
  -3  18  19    8.61    3.78
  -3 -18  18    3.97    2.83
  -3  18  18    1.32    2.33
  -3 -18  17   22.36    3.79
  -3  18  17   19.42    3.89
  -3 -18  16   -0.15    2.14
  -3  18  16    4.13    3.06
  -3 -18  15    9.95    2.78
  -3  18  15   10.00    3.41
  -3 -18  14   10.38    2.45
  -3  18  14   10.38    3.00
  -3 -18  13  112.68    6.26
  -3  18  13   91.54    6.76
  -3 -18  12   42.35    3.72
  -3  18  12   32.50    4.22
  -3 -18  11    7.50    2.08
  -3  18  11    4.45    2.15
  -3 -18  10   11.38    2.22
  -3  18  10    8.66    2.50
  -3 -18   9   18.89    2.37
  -3  18   9   14.89    2.81
  -3 -18   8    9.73    1.74
  -3  18   8    7.02    2.16
  -3 -18   7   34.36    2.66
  -3  18   7   35.30    3.71
  -3 -18   6    5.84    1.28
  -3  18   6    3.31    1.95
  -3 -18   5   88.71    3.68
  -3  18   5   82.14    5.15
  -3 -18   4    0.57    1.03
  -3  18   4    4.08    2.07
  -3  18   3  187.03    7.56
   3  18  -3  172.30    4.59
  -3  18   2    1.99    1.91
   3  18  -2    2.30    1.12
  -3  18   1   77.29    4.70
   3  18  -1   79.22    3.15
  -3  18   0   21.87    2.92
   3  18   0   25.77    2.00
  -3  18  -1   24.64    2.87
  -3  18  -2    8.38    2.24
   3  18   2   11.80    1.81
  -3  18  -3   75.65    5.04
   3  18   3   83.24    4.03
  -3  18  -4    1.03    1.77
   3  18   4   -0.40    1.08
   3 -18   5   -0.53    1.26
   3  18   5   -0.44    1.37
   3 -18   6   13.32    2.92
   3  18   6   16.57    2.50
   3 -18   7    6.79    2.11
   3  18   7    4.05    1.67
   3 -18   8    4.32    2.03
   3  18   8    6.56    2.20
   3 -18   9   18.54    3.09
   3  18   9   18.48    2.93
   3 -18  10    0.66    1.74
   3  18  10    0.87    1.37
   3 -18  11   38.22    4.73
   3  18  11   32.31    3.68
   3 -18  12    3.91    2.29
   3  18  12    6.15    2.59
   3 -18  13   12.19    3.44
   3  18  13   10.09    3.02
   3 -18  14   -0.47    2.58
   3  18  14    2.54    2.41
   3 -18  15    2.89    3.08
   3  18  15    0.00    2.29
   3 -18  16    3.24    2.53
   3  18  16    1.21    2.49
   3 -18  17    0.31    2.36
   3  18  17    2.04    2.68
   3 -18  18    2.63    3.32
   3  18  18    1.22    2.62
   3 -18  19   -0.87    2.34
   3  18  19    1.17    2.15
   3 -18  20   -3.28    2.86
   3  18  20    1.23    2.92
   3 -18  21    0.53    2.84
   3  18  21    1.27    2.41
  -3  19  23    2.29    3.69
  -3  19  22   -0.68    3.30
  -3  19  21    2.47    3.57
  -3 -19  20    6.39    3.11
  -3  19  20    3.00    2.67
  -3 -19  19   18.46    3.88
  -3  19  19   16.38    4.04
  -3 -19  18   10.40    3.30
  -3  19  18    9.94    3.83
  -3 -19  17    9.03    3.08
  -3  19  17   11.18    3.30
  -3 -19  16    1.55    2.38
  -3  19  16    1.91    2.26
  -3 -19  15    0.90    2.15
  -3  19  15   -1.84    1.75
  -3 -19  14   10.73    2.44
  -3  19  14   16.44    3.89
  -3 -19  13   31.61    3.85
  -3  19  13   17.03    3.48
  -3 -19  12   13.25    2.74
  -3  19  12   13.06    3.09
  -3 -19  11    0.77    1.59
  -3  19  11   -0.15    1.74
  -3 -19  10    4.42    1.75
  -3  19  10    4.15    2.63
  -3 -19   9  172.63    6.45
  -3  19   9  156.16    8.06
  -3 -19   8   -0.12    1.19
  -3  19   8    0.53    1.55
  -3 -19   7   62.69    3.59
  -3  19   7   55.89    4.85
  -3 -19   6    0.06    1.11
  -3  19   6   -0.29    1.27
  -3 -19   5   31.49    2.44
  -3  19   5   31.87    3.59
  -3 -19   4   60.43    3.10
  -3  19   4   62.27    4.65
  -3  19   3  248.65    8.90
   3  19  -3  220.06    5.35
  -3  19   2   53.78    4.36
   3  19  -2   50.17    2.67
  -3  19   1   37.89    3.67
   3  19  -1   39.35    2.38
  -3  19   0    0.28    1.33
  -3  19  -1   56.04    4.18
   3  19   1   68.20    3.29
  -3  19  -2    9.77    2.37
   3  19   2   10.90    1.64
  -3  19  -3   35.72    3.72
   3  19   3   29.72    2.71
  -3  19  -4    0.67    1.33
   3  19   4    1.02    1.25
   3  19   5   65.29    4.09
   3 -19   6   41.05    4.05
   3  19   6   44.49    3.74
   3 -19   7  204.93    8.80
   3  19   7  212.37    7.84
   3 -19   8   12.64    2.72
   3  19   8   16.46    2.89
   3 -19   9    7.65    2.32
   3  19   9   10.23    2.57
   3 -19  10   10.46    2.69
   3  19  10   11.54    2.64
   3 -19  11   25.46    3.84
   3  19  11   22.54    3.50
   3 -19  12   20.86    4.00
   3  19  12   18.20    3.41
   3 -19  13   30.14    4.53
   3  19  13   25.65    3.65
   3 -19  14   18.31    3.56
   3  19  14   15.76    3.36
   3 -19  15   -2.50    1.70
   3  19  15   -1.92    2.13
   3 -19  16    2.39    3.04
   3  19  16    3.16    2.11
   3 -19  17    3.01    3.41
   3  19  17    4.67    2.89
   3 -19  18    4.85    2.86
   3  19  18    1.73    2.78
   3 -19  19   -0.04    3.28
   3  19  19    6.13    2.71
   3 -19  20    1.88    2.68
   3  19  20    2.87    3.06
   3 -19  21    4.74    3.23
   3  19  21    5.53    3.29
  -3  20  23   -1.06    2.64
  -3  20  22   -0.61    2.40
  -3  20  21   -2.36    2.20
  -3  20  20    0.66    2.40
  -3  20  19   -1.52    2.97
  -3 -20  18    5.74    2.86
  -3  20  18    8.39    3.18
  -3 -20  17    1.74    2.57
  -3  20  17    0.10    2.25
  -3 -20  16    3.31    2.50
  -3  20  16    7.12    3.28
  -3 -20  15    0.05    2.17
  -3  20  15   -0.78    1.84
  -3 -20  14   26.28    3.36
  -3  20  14   28.04    4.28
  -3 -20  13   62.31    4.96
  -3  20  13   55.95    5.86
  -3 -20  12   78.71    5.23
  -3  20  12   65.48    6.10
  -3 -20  11   18.80    2.78
  -3  20  11   14.71    3.14
  -3 -20  10    0.41    1.46
  -3  20  10   -1.58    1.45
  -3 -20   9   10.12    2.11
  -3  20   9   11.44    2.70
  -3 -20   8    1.20    1.37
  -3  20   8    1.76    2.27
  -3 -20   7   53.99    3.52
  -3  20   7   44.75    4.29
  -3 -20   6   44.05    2.99
  -3  20   6   32.87    3.86
  -3 -20   5    1.93    1.26
  -3  20   5    1.79    1.57
  -3 -20   4  102.47    4.04
  -3  20   4   96.18    5.82
  -3  20   3   16.36    2.98
   3  20  -3    7.40    1.51
  -3  20   2  117.81    6.25
   3  20  -2  120.03    4.10
  -3  20   1    0.38    1.31
   3  20  -1    1.52    1.05
  -3  20   0   -1.13    1.61
   3  20   0    1.44    1.10
  -3  20  -1    9.92    2.43
   3  20   1    7.92    1.60
  -3  20  -2    8.08    2.30
   3  20   2    7.80    1.56
  -3  20  -3    3.23    1.62
   3  20   3    2.46    1.39
  -3  20  -4   17.25    3.01
   3  20   4   16.62    2.29
  -3  20  -5    8.55    2.24
   3  20   5    8.28    1.97
   3 -20   6   11.71    2.51
   3  20   6   14.04    2.51
   3 -20   7   15.49    2.80
   3  20   7   12.81    2.34
   3 -20   8    0.77    2.13
   3  20   8    1.40    1.80
   3 -20   9    0.59    2.17
   3  20   9    3.47    1.64
   3 -20  10   30.41    4.28
   3  20  10   33.13    4.02
   3 -20  11    3.52    2.15
   3  20  11    2.45    1.82
   3 -20  12   11.36    3.49
   3  20  12    9.78    2.60
   3 -20  13    1.30    1.94
   3  20  13    0.08    1.59
   3 -20  14   -0.28    1.88
   3  20  14    1.17    2.30
   3 -20  15   -0.45    1.88
   3  20  15    0.20    1.73
   3 -20  16    0.42    2.25
   3  20  16   -0.20    1.81
   3 -20  17   -0.68    2.89
   3  20  17    0.09    1.85
   3 -20  18    2.80    3.41
   3  20  18    0.99    2.12
   3 -20  19    2.89    2.76
   3  20  19    1.65    2.96
   3 -20  20   -2.05    3.22
   3  20  20   -1.50    2.11
  -3  21  22   -0.55    2.51
  -3  21  21    0.39    3.10
  -3  21  20   -0.84    3.04
  -3  21  19    0.64    2.28
  -3  21  18   26.63    5.03
  -3  21  17    2.69    3.04
  -3 -21  16    1.50    2.15
  -3  21  16    5.00    2.51
  -3 -21  15    0.98    2.05
  -3  21  15   -0.35    2.42
  -3 -21  14   22.34    3.49
  -3  21  14   15.09    3.44
  -3 -21  13    2.99    2.33
  -3  21  13    2.11    2.93
  -3 -21  12   22.05    3.29
  -3  21  12   25.06    4.09
  -3 -21  11    2.07    1.76
  -3  21  11   -0.80    2.57
  -3 -21  10    8.58    2.10
  -3  21  10    7.38    2.50
  -3 -21   9    1.09    1.53
  -3  21   9    0.37    1.67
  -3 -21   8  177.73    6.52
  -3  21   8  163.47    8.27
  -3 -21   7   20.30    2.35
  -3  21   7   17.96    3.00
  -3 -21   6   39.63    2.86
  -3  21   6   38.72    3.99
  -3 -21   5   -1.70    1.02
  -3  21   5   -0.40    1.92
  -3 -21   4  132.27    4.71
  -3  21   4  129.91    6.91
  -3  21   3   26.95    3.58
   3  21  -3   27.83    2.30
  -3  21   2  167.27    7.41
   3  21  -2  168.41    5.02
  -3  21   1    2.57    1.60
   3  21  -1    5.48    1.37
  -3  21   0   35.80    3.55
   3  21   0   36.93    2.61
  -3  21  -1    6.68    2.33
   3  21   1   12.56    1.89
  -3  21  -2  144.19    6.96
   3  21   2  153.18    5.48
  -3  21  -3    5.25    1.95
   3  21   3    7.97    1.80
  -3  21  -4   40.81    4.15
   3  21   4   42.38    3.37
  -3  21  -5    9.60    2.73
   3  21   5   10.28    2.19
   3 -21   6   94.35    5.98
   3  21   6  122.08    6.04
   3 -21   7    8.12    2.62
   3  21   7    4.98    1.72
   3 -21   8   50.48    4.66
   3  21   8   53.00    4.37
   3 -21   9    1.58    1.71
   3  21   9    1.15    1.93
   3 -21  10    9.79    2.60
   3  21  10    8.74    2.67
   3 -21  11    3.31    2.80
   3  21  11    4.00    2.39
   3 -21  12   46.96    5.14
   3  21  12   53.83    5.36
   3 -21  13   -0.02    2.44
   3  21  13    2.30    2.53
   3 -21  14    5.11    3.01
   3  21  14    2.51    2.47
   3 -21  15   -2.10    2.51
   3  21  15   -2.72    2.10
   3 -21  16   -1.06    2.76
   3  21  16   -0.40    1.81
   3 -21  17   -1.57    2.04
   3  21  17   -0.72    1.90
   3 -21  18    5.27    2.95
   3  21  18    4.48    2.59
   3 -21  19    1.45    3.60
   3  21  19   -1.33    1.92
   3 -21  20    1.16    2.75
   3  21  20    5.16    3.37
  -3  22  22    3.50    3.72
  -3  22  21   -1.46    2.96
  -3  22  20    0.57    2.54
  -3  22  19    2.20    3.27
  -3  22  18    4.72    2.76
  -3  22  17    3.08    2.46
  -3  22  16   10.72    3.09
  -3  22  15    1.37    2.22
  -3  22  14   19.91    4.17
  -3  22  13   14.38    3.45
  -3 -22  12   10.22    2.48
  -3  22  12   44.59    5.10
  -3 -22  11    4.97    1.90
  -3  22  11   12.73    3.12
  -3 -22  10    8.62    2.21
  -3  22  10    8.28    2.62
  -3 -22   9    2.03    1.80
  -3  22   9   -1.69    2.22
  -3 -22   8   48.71    3.59
  -3  22   8   43.42    4.53
  -3 -22   7    0.39    1.30
  -3  22   7    1.28    2.32
  -3 -22   6   48.95    3.22
  -3  22   6   48.63    4.69
  -3 -22   5   19.85    2.16
  -3  22   5   18.29    2.95
  -3 -22   4    4.40    1.42
  -3  22   4    6.35    2.46
  -3  22   3   55.37    4.53
   3  22  -3   60.68    3.28
  -3  22   2   55.75    4.44
   3  22  -2   51.07    2.99
  -3  22   1    4.60    2.13
   3  22  -1    6.32    1.46
  -3  22   0    1.20    1.85
   3  22   0   -0.78    1.11
  -3  22  -1   12.10    2.41
   3  22   1    8.18    1.76
  -3  22  -2    5.36    2.35
   3  22   2    5.73    1.78
  -3  22  -3    6.22    2.04
   3  22   3    6.45    1.73
  -3  22  -4    1.83    2.14
   3  22   4    0.96    1.47
  -3  22  -5   12.06    2.79
   3  22   5    8.91    2.14
   3 -22   6   17.14    3.06
   3  22   6    8.79    2.24
   3 -22   7    4.59    1.98
   3  22   7    7.91    2.26
   3 -22   8   38.59    4.35
   3  22   8   38.55    4.02
   3 -22   9   -0.43    2.09
   3  22   9    1.06    2.02
   3 -22  10    3.15    2.43
   3  22  10   -0.65    1.87
   3 -22  11   11.08    2.87
   3  22  11   11.59    2.97
   3 -22  12    1.40    2.66
   3  22  12   -0.71    2.14
   3 -22  13   -0.06    1.81
   3  22  13   -0.72    2.29
   3 -22  14    3.86    2.42
   3  22  14    4.17    2.81
   3 -22  15    3.12    2.30
   3  22  15    2.84    2.82
   3 -22  16   -1.66    1.89
   3  22  16   -0.37    1.87
   3 -22  17   -0.57    2.99
   3  22  17    0.34    2.63
   3 -22  18    0.93    3.43
   3  22  18   -0.69    2.80
   3 -22  19   -0.35    2.50
   3  22  19    0.65    2.31
   3 -22  20   -2.11    3.30
   3  22  20   -1.90    2.15
  -3  23  22    1.34    2.94
  -3  23  21    0.87    2.60
  -3  23  20    0.88    3.23
  -3  23  19    4.34    2.83
  -3  23  18   -0.89    2.83
  -3  23  17    5.10    3.46
  -3  23  16    1.72    3.00
  -3  23  15   13.90    3.84
  -3  23  14   10.60    3.28
  -3  23  13   11.97    3.64
  -3  23  12    0.47    2.68
  -3  23  11    7.68    2.64
  -3  23  10   -0.96    2.41
  -3  23   9   37.58    4.47
  -3  23   8   13.44    3.22
  -3  23   7   39.58    4.30
  -3  23   6   23.22    3.36
  -3  23   5   58.10    5.17
  -3  23   4    0.26    1.57
  -3  23   3   90.65    5.79
  -3  23   2    2.70    1.72
  -3  23   1   34.55    3.88
  -3  23   0   51.41    4.36
  -3  23  -1  113.60    6.39
   3  23   1  136.16    5.31
  -3  23  -2   23.20    3.10
   3  23   2   26.35    2.58
  -3  23  -3   50.18    4.39
   3  23   3   54.88    3.88
  -3  23  -4    8.19    2.19
   3  23   4    5.36    1.81
  -3  23  -5   16.57    2.81
   3  23   5   18.35    2.85
   3 -23   6    0.03    1.42
   3  23   6    3.20    1.92
   3 -23   7   26.34    3.80
   3  23   7   25.95    3.31
   3 -23   8   13.51    2.72
   3  23   8   14.30    2.86
   3 -23   9   10.41    2.65
   3  23   9   10.38    2.73
   3 -23  10   13.83    2.96
   3  23  10   18.42    3.34
   3 -23  11   17.67    3.86
   3  23  11   25.35    3.63
   3 -23  12    3.16    2.22
   3  23  12    0.84    2.39
   3 -23  13    2.69    2.78
   3  23  13    4.12    2.75
   3 -23  14    2.26    2.72
   3  23  14    1.90    2.56
   3 -23  15    0.27    2.65
   3  23  15    0.07    1.80
   3 -23  16    5.52    3.39
   3  23  16    3.31    2.96
   3 -23  17    3.07    2.67
   3  23  17    4.06    3.24
   3 -23  18    1.02    2.55
   3  23  18    1.71    3.15
   3 -23  19    3.20    3.59
   3  23  19    5.22    3.50
  -3  24  21    3.40    3.51
  -3  24  20   -1.62    2.24
  -3  24  19    2.54    3.27
  -3  24  18    3.18    2.68
  -3  24  17   12.80    3.66
  -3  24  16   -1.69    2.00
  -3  24  15   17.64    3.92
  -3  24  14    1.91    2.98
  -3  24  13   27.53    4.41
  -3  24  12    7.18    2.69
  -3  24  11    9.01    3.28
  -3  24  10   -0.21    1.77
  -3  24   9   25.32    3.90
  -3  24   8    1.65    1.91
  -3  24   7   32.44    4.32
  -3  24   6   10.37    2.94
  -3  24   5    8.81    2.87
  -3  24   4   14.33    2.75
  -3  24   3   12.83    2.56
  -3  24   2    5.50    1.90
  -3  24   1    5.00    1.85
  -3  24   0   10.63    2.60
  -3  24  -1    5.59    2.24
  -3  24  -2   13.41    2.52
  -3  24  -3    2.97    1.78
   3  24   3    1.23    1.35
  -3  24  -4    2.66    1.70
   3  24   4    2.19    1.60
  -3  24  -5    1.95    1.67
   3  24   5    0.09    1.53
   3 -24   6    8.38    2.23
   3  24   6    9.48    2.37
   3 -24   7   10.02    2.75
   3  24   7    8.93    2.43
   3 -24   8    4.16    2.33
   3  24   8    5.36    1.87
   3 -24   9   13.16    3.36
   3  24   9   17.10    3.19
   3 -24  10    1.99    2.54
   3  24  10    3.01    2.23
   3 -24  11   12.79    3.16
   3  24  11    1.37    2.25
   3 -24  12   -0.70    2.34
   3  24  12    1.11    1.93
   3 -24  13   12.35    3.12
   3  24  13   10.61    3.35
   3 -24  14    2.38    2.17
   3  24  14   -1.20    2.33
   3 -24  15    0.17    1.95
   3  24  15    1.94    2.01
   3 -24  16    2.37    2.42
   3  24  16    5.06    3.12
   3 -24  17    4.47    3.38
   3  24  17    4.88    3.21
   3 -24  18   -2.23    3.14
   3  24  18    3.10    3.16
   3 -24  19   -1.33    2.35
   3  24  19   -3.03    2.83
  -3  25  21    4.04    3.24
  -3  25  20   -1.63    2.36
  -3  25  19    1.14    2.58
  -3  25  18    1.28    3.26
  -3  25  17   -1.28    3.04
  -3  25  16    4.14    3.51
  -3  25  15   17.74    4.44
  -3  25  14    7.49    3.04
  -3  25  13   24.55    4.28
  -3  25  12    1.87    2.21
  -3  25  11    3.56    2.38
  -3  25  10   -3.19    2.34
  -3  25   9   14.94    3.59
  -3  25   8   15.19    3.49
  -3  25   7    8.77    2.66
  -3  25   6   45.45    4.66
  -3  25   5   29.44    3.74
  -3  25   4   54.76    5.00
  -3  25   3    2.22    1.69
  -3  25   2   45.13    4.23
  -3  25   1    4.63    1.88
  -3  25   0   15.36    2.72
  -3  25  -1   24.61    3.19
  -3  25  -2   46.89    4.51
  -3  25  -3   24.40    3.58
  -3  25  -4   21.44    3.18
  -3  25  -5    0.81    1.61
   3 -25   6   16.61    3.19
   3 -25   7    9.76    2.46
   3  25   7   17.34    3.03
   3 -25   8   11.63    3.04
   3  25   8   12.53    2.85
   3 -25   9   47.41    5.14
   3  25   9   52.78    4.98
   3 -25  10    3.78    2.22
   3  25  10    5.40    2.52
   3 -25  11    4.60    2.93
   3  25  11    8.27    2.95
   3 -25  12    0.39    1.83
   3  25  12    0.34    1.82
   3 -25  13    4.01    2.97
   3  25  13    3.20    2.27
   3 -25  14    2.30    2.92
   3  25  14    3.69    2.47
   3 -25  15    5.57    3.22
   3  25  15    8.33    2.81
   3 -25  16    2.51    3.14
   3  25  16   -2.16    2.58
   3 -25  17   14.59    4.26
   3  25  17   15.06    4.04
   3 -25  18    1.17    2.53
   3  25  18   -2.14    2.14
   3 -25  19    6.09    4.16
   3  25  19    0.98    2.48
  -3  26  21   -2.29    2.45
  -3  26  20    1.92    3.57
  -3  26  19    0.79    2.82
  -3  26  18    2.46    2.89
  -3  26  17    0.22    2.46
  -3  26  16   18.05    4.18
  -3  26  15   -1.46    2.15
  -3  26  14   15.65    3.82
  -3  26  13    3.24    3.14
  -3  26  12   11.21    3.75
  -3  26  11   -1.41    2.36
  -3  26  10    1.27    2.13
  -3  26   9   -0.04    1.76
  -3  26   8   25.22    3.88
  -3  26   7    9.72    3.18
  -3  26   6    5.52    2.29
  -3  26   5    4.54    2.09
  -3  26   4   17.12    3.27
  -3  26   3   -0.83    1.44
  -3  26   2   25.03    3.35
  -3  26   1    1.58    2.07
  -3  26   0    1.87    2.12
  -3  26  -1   21.09    3.32
  -3  26  -2   15.06    3.01
  -3  26  -3    6.28    2.50
  -3  26  -4    5.47    2.52
  -3  26  -5   26.24    3.56
   3 -26   6    4.78    2.47
   3 -26   7    6.83    2.29
   3 -26   8   24.90    3.59
   3 -26   9    1.63    1.96
   3 -26  10   -0.90    2.35
   3 -26  11    0.40    2.47
   3 -26  12    2.19    2.60
   3 -26  13    4.58    2.46
   3  26  13    4.52    2.41
   3 -26  14   14.08    3.39
   3  26  14   13.82    3.35
   3 -26  15    4.29    2.56
   3  26  15    6.44    2.61
   3 -26  16    3.16    2.48
   3 -26  17   -0.13    2.30
   3 -26  18    3.50    3.67
  -3  27  20    7.24    3.62
  -3  27  19    1.76    3.57
  -3  27  18    2.85    3.63
  -3  27  17    3.03    3.57
  -3  27  16    9.02    3.97
  -3  27  15    2.93    2.72
  -3  27  14   29.99    5.22
  -3  27  13    1.85    2.52
  -3  27  12   20.67    4.08
  -3  27  11    9.08    3.01
  -3  27  10    1.69    2.00
  -3  27   9   -2.76    2.30
  -3  27   8   32.41    4.64
  -3  27   7   30.53    4.17
  -3  27   6   40.58    4.92
  -3  27   5    8.07    2.94
  -3  27   4   61.80    5.45
  -3  27   3    2.93    1.83
  -3  27   2   11.71    2.87
  -3  27   1    1.24    2.02
  -3  27   0    4.75    2.38
  -3  27  -1    4.22    1.91
  -3  27  -2   11.80    2.55
  -3  27  -3    7.41    2.61
  -3  27  -4    3.74    2.33
  -3  27  -5    3.70    1.94
   3 -27   6    8.37    2.81
   3 -27   7   13.36    2.85
   3 -27   8   27.38    3.77
   3 -27   9    7.17    2.47
   3 -27  10   14.83    3.49
   3 -27  11    0.94    2.02
   3 -27  12    5.27    3.12
   3 -27  13    9.27    3.54
   3 -27  14    5.47    2.62
   3 -27  15    5.95    2.84
   3 -27  16   11.40    3.44
   3 -27  17    1.03    3.47
   3 -27  18    4.63    3.88
  -3  28  20    3.82    4.03
  -3  28  19    3.02    2.97
  -3  28  18    0.33    2.70
  -3  28  17    6.44    3.28
  -3  28  16   -0.21    2.60
  -3  28  15   11.69    4.10
  -3  28  14    0.37    2.39
  -3  28  13    6.24    3.59
  -3  28  12    1.49    3.02
  -3  28  11    1.21    2.19
  -3  28  10   -1.65    2.35
  -3  28   9   -0.39    1.87
  -3  28   8    0.40    2.07
  -3  28   7   22.04    4.05
  -3  28   6   14.85    3.16
  -3  28   5   -1.33    1.53
  -3  28   4   14.50    2.94
  -3  28   3    5.10    2.12
  -3  28   2    1.68    2.21
  -3  28   1    2.32    2.17
  -3  28   0   21.21    3.20
  -3  28  -1   -0.19    1.96
  -3  28  -2    8.86    2.69
  -3  28  -3   14.78    2.86
  -3  28  -4   33.05    4.20
  -3  28  -5    2.71    1.93
   3 -28   6   27.90    4.07
   3 -28   7   12.09    3.20
   3 -28   8    5.21    2.65
   3 -28   9    7.48    2.97
   3 -28  10   10.96    3.26
   3 -28  11   -1.16    1.76
   3 -28  12   12.22    3.65
   3 -28  13   12.79    3.74
   3 -28  14    2.94    3.16
   3 -28  15    2.92    3.15
   3 -28  16    0.42    3.09
   3 -28  17   -1.71    2.90
   3 -28  18   -0.27    2.62
  -3  29  19   12.69    4.69
  -3  29  18    4.45    3.92
  -3  29  17    4.56    3.65
  -3  29  16    1.84    3.47
  -3  29  15    6.13    3.14
  -3  29  14   -0.54    3.17
  -3  29  13    9.23    3.29
  -3  29  12    9.01    3.19
  -3  29  11   -2.75    2.43
  -3  29  10    8.54    3.04
  -3  29   9    5.12    3.02
  -3  29   8    0.32    2.54
  -3  29   7   27.48    4.17
  -3  29   6    1.02    2.44
  -3  29   5    9.66    2.69
  -3  29   4    4.21    2.13
  -3  29   3   29.09    3.80
  -3  29   2    8.78    2.80
  -3  29   1    1.06    1.63
  -3  29   0    3.91    2.31
  -3  29  -1   17.37    3.22
  -3  29  -2    1.35    1.62
  -3  29  -3    6.16    2.60
  -3  29  -4    8.46    2.38
  -3  29  -5    7.56    2.38
   3 -29   6    2.61    2.41
   3 -29   7   37.24    4.64
   3 -29   8   -0.46    2.26
   3 -29   9   16.52    3.72
   3 -29  10    0.11    1.74
   3 -29  11   17.39    3.94
   3 -29  12   10.22    3.15
   3 -29  13    9.14    3.04
   3 -29  14   11.15    3.80
   3 -29  15    1.12    3.10
   3 -29  16    4.13    3.31
   3 -29  17    6.67    3.00
  -3  30  19    5.18    3.37
  -3  30  18    1.29    2.99
  -3  30  17    2.45    2.76
  -3  30  16    0.78    2.76
  -3  30  15   -0.20    3.40
  -3  30  14   -0.97    2.38
  -3  30  13    0.12    3.13
  -3  30  12    0.09    2.90
  -3  30  11    1.24    2.31
  -3  30  10   13.07    3.80
  -3  30   9   -1.42    1.87
  -3  30   8   -2.21    1.63
  -3  30   7    0.51    1.93
  -3  30   6    0.95    2.49
  -3  30   5    1.64    2.46
  -3  30   4    8.55    2.57
  -3  30   3    3.62    2.42
  -3  30   2    6.88    2.66
  -3  30   1   -0.22    1.47
  -3  30   0   -0.91    2.00
  -3  30  -1   10.81    2.57
  -3  30  -2    0.80    2.12
  -3  30  -3   22.51    3.71
  -3  30  -4    0.59    1.67
  -3  30  -5   17.40    3.56
   3 -30   6    1.18    2.40
   3 -30   7    3.38    2.56
   3 -30   8    3.77    2.54
   3 -30   9    7.68    3.17
   3 -30  11   12.03    3.57
   3 -30  12    2.63    2.41
   3 -30  13    5.58    2.81
   3 -30  14    4.66    2.63
   3 -30  15    2.47    2.46
   3 -30  16    2.61    2.57
   3 -30  17   -0.16    2.35
  -3  31  18   13.66    4.70
  -3  31  17    3.11    3.83
  -3  31  16   -1.77    3.21
  -3  31  15    1.51    2.75
  -3  31  14   -3.07    3.04
  -3  31  13    0.90    2.29
  -3  31  12    1.59    2.37
  -3  31  11   22.01    4.65
  -3  31  10    1.33    2.36
  -3  31   9    7.46    3.38
  -3  31   8    9.61    3.45
  -3  31   7    2.12    2.69
  -3  31   6   -0.58    1.79
  -3  31   5    0.88    2.38
  -3  31   4    4.11    2.63
  -3  31   3   22.82    3.85
  -3  31   2    2.33    2.38
  -3  31   1   14.36    3.23
  -3  31   0    0.81    1.66
  -3  31  -1    6.36    2.69
  -3  31  -2    3.84    2.38
  -3  31  -3    7.83    2.39
  -3  31  -4    1.55    2.34
  -3  31  -5   15.61    3.44
   3 -31   6    5.83    2.27
   3 -31   7    0.87    1.75
   3 -31   8    6.45    2.85
   3 -31   9   -0.82    2.40
   3 -31  10    1.26    2.02
   3 -31  11    7.80    3.23
   3 -31  12    9.31    3.59
   3 -31  13   20.86    4.04
   3 -31  14    3.26    2.54
   3 -31  15    9.97    3.32
   3 -31  16   -1.59    2.10
  -3  32  18    1.32    3.25
  -3  32  17    2.63    3.09
  -3  32  16   -0.66    2.77
  -3  32  15   -0.47    3.35
  -3  32  14    3.28    2.86
  -3  32  13   -0.26    2.93
  -3  32  12    2.83    3.32
  -3  32  11    6.87    2.95
  -3  32  10    1.67    3.24
  -3  32   9    9.03    3.03
  -3  32   8    2.11    2.42
  -3  32   7    6.20    2.59
  -3  32   6   -0.58    2.52
  -3  32   5   11.70    3.31
  -3  32   4    1.74    2.47
  -3  32   3   -1.33    2.22
  -3  32   2    3.64    2.47
  -3  32   1    4.88    2.64
  -3  32   0    1.20    2.16
  -3  32  -1    0.50    1.63
  -3  32  -2    6.76    2.73
  -3  32  -3   -0.14    2.23
  -3  32  -4   14.93    3.44
  -3  32  -5    5.63    2.37
   3 -32   6    2.43    1.89
   3 -32   7   -0.96    1.54
   3 -32   8    2.87    2.53
   3 -32   9   -0.50    2.42
   3 -32  10   11.20    2.99
   3 -32  11    2.21    2.81
   3 -32  12    7.60    3.69
   3 -32  13    4.53    3.32
   3 -32  14    3.05    2.63
   3 -32  15    2.02    2.56
   3 -32  16   -3.08    2.80
  -3  33  17    3.65    4.20
  -3  33  16    5.38    4.20
  -3  33  15    0.41    2.66
  -3  33  14   -0.14    3.08
  -3  33  13    2.05    2.60
  -3  33  12    5.72    3.17
  -3  33  11    8.59    3.99
  -3  33  10   21.02    4.58
  -3  33   9    2.10    3.34
  -3  33   7    0.33    2.84
  -3  33   6    5.10    3.13
  -3  33   5    3.58    2.30
  -3  33   4    8.50    3.05
  -3  33   3    1.27    2.43
  -3  33   2   14.58    3.42
  -3  33   1   15.43    3.53
  -3  33   0   26.23    4.05
  -3  33  -1    1.48    2.47
  -3  33  -2    2.28    1.99
  -3  33  -3   10.09    2.77
  -3  33  -4   15.99    3.22
  -3  33  -5    1.86    2.09
   3 -33   6    7.43    2.83
   3 -33   7    2.64    1.99
   3 -33   8    2.29    2.35
   3 -33   9    3.71    2.77
   3 -33  10    2.68    2.24
   3 -33  11    1.53    2.91
   3 -33  12   15.11    4.00
   3 -33  13   -0.76    2.75
   3 -33  14   11.28    3.30
   3 -33  15   -0.02    3.22
  -3  34  17    0.79    3.80
  -3  34  16    1.60    3.07
  -3  34  15   -2.30    3.24
  -3  34  14   -1.11    2.44
  -3  34  13    3.33    3.64
  -3  34  12    1.50    3.28
  -3  34  11    1.82    2.61
  -3  34  10   17.76    4.53
  -3  34   9    3.61    2.84
  -3  34   8   10.48    3.79
  -3  34   7    0.14    2.83
  -3  34   6   11.17    3.09
  -3  34   5   -0.92    1.86
  -3  34   4    4.37    2.81
  -3  34   3    7.19    3.12
  -3  34   2    0.66    2.50
  -3  34   1    2.39    2.65
  -3  34   0    1.87    2.59
  -3  34  -1   -3.37    2.14
  -3  34  -2   -0.60    2.46
  -3  34  -3    9.27    3.27
  -3  34  -4    1.13    2.58
   3 -34   6    4.05    2.57
   3 -34   7   -1.04    2.21
   3 -34   8   -0.32    1.61
   3 -34   9    5.45    2.85
   3 -34  10   -0.98    1.77
   3 -34  11    1.10    2.70
   3 -34  12    0.82    2.79
   3 -34  13    0.39    2.94
   3 -34  14   -1.55    2.71
  -3  35  16    2.00    3.79
  -3  35  15    7.87    3.70
  -3  35  14   -2.51    3.48
  -3  35  13    1.49    3.30
  -3  35  12    4.12    2.93
  -3  35  11   10.14    4.04
  -3  35  10    5.34    3.81
  -3  35   9   14.54    4.18
  -3  35   8    1.29    2.65
  -3  35   7    7.98    3.05
  -3  35   6   13.85    3.42
  -3  35   5    4.10    3.06
  -3  35   4    2.58    2.26
  -3  35   3   21.42    4.12
  -3  35   2    1.86    2.70
  -3  35   1   27.29    4.40
  -3  35   0   25.63    4.24
  -3  35  -1    8.80    2.76
  -3  35  -2   11.81    3.08
  -3  35  -3   17.46    3.45
  -3  35  -4   17.41    3.39
   3 -35   5    8.23    2.49
   3 -35   6   -0.41    2.20
   3 -35   7    1.41    2.43
   3 -35   8    0.37    1.70
   3 -35   9    1.79    2.70
   3 -35  10    0.93    1.99
   3 -35  11    1.21    2.68
   3 -35  12    2.69    3.01
  -3  36  15    0.49    3.83
  -3  36  14    1.29    2.55
  -3  36  13   -0.70    3.43
  -3  36  12    2.16    3.35
  -3  36  11   11.78    3.79
  -3  36  10    1.19    2.73
  -3  36   9   24.77    5.07
  -3  36   8    1.65    3.20
  -3  36   7   14.05    3.99
  -3  36   6    4.45    3.31
  -3  36   5    2.59    2.86
  -3  36   4   -0.43    1.98
  -3  36   3   -0.48    2.39
  -3  36   2    1.63    2.70
  -3  36   1    3.16    2.27
  -3  36   0    2.96    2.24
  -3  36  -1    1.76    1.97
  -3  36  -2    2.33    2.69
  -3  36  -3    1.96    2.71
  -3  36  -4    6.79    3.03
   3 -36   5    1.45    2.34
   3 -36   6    2.15    1.95
   3 -36   7    3.89    2.13
   3 -36   8   -0.20    2.25
   3 -36   9    0.38    1.80
  -3  37  15    2.46    3.11
  -3  37  14    1.65    3.95
  -3  37  13    2.88    2.85
  -3  37  12    0.41    2.59
  -3  37  11   12.54    4.61
  -3  37  10    4.89    3.71
  -3  37   9    3.59    2.86
  -3  37   8    8.80    3.91
  -3  37   7   11.69    3.87
  -3  37   6    5.87    3.40
  -3  37   5   11.74    3.28
  -3  37   4    1.31    2.86
  -3  37   3   -0.55    2.61
  -3  37   2    2.41    2.97
  -3  37   1   17.59    3.44
  -3  37   0    3.65    2.87
  -3  37  -1   20.19    3.97
  -3  37  -2    1.46    2.76
  -3  37  -3   16.64    3.80
  -3  37  -4    1.11    2.13
   3 -37   5    5.84    2.34
   3 -37   6   -0.04    2.19
  -3  38  14    0.27    3.02
  -3  38  13    2.19    3.61
  -3  38  12    5.04    4.14
  -3  38  11    2.56    3.53
  -3  38  10    9.21    3.52
  -3  38   9    6.40    3.79
  -3  38   8   17.63    4.19
  -3  38   7   -0.76    2.44
  -3  38   6    5.55    2.75
  -3  38   5   -0.27    2.15
  -3  38   4    7.01    3.42
  -3  38   3    0.48    2.76
  -3  38   2    0.45    2.75
  -3  38   1   -0.34    1.94
  -3  39  13    0.06    2.76
  -3  39  12   10.20    3.83
  -3  39  11    1.06    2.53
  -3  39  10    6.22    4.01
  -3  39   9    2.42    2.69
  -3  39   8    5.79    3.64
  -4   0  25   -0.08    2.31
  -4   0  24    0.33    2.04
  -4   0  23   -3.11    1.61
  -4   0  22   11.38    3.75
  -4   0  21   -0.70    2.50
  -4   0  20    2.20    1.98
  -4   0  19   -0.80    2.17
  -4   0  18   -1.25    1.39
  -4   0  17    0.31    1.57
  -4   0  16   26.82    3.87
  -4   0  15    2.00    2.16
  -4   0  14   26.89    3.25
  -4   0  13    0.13    1.14
  -4   0  12    9.08    1.87
  -4   0  11   -1.45    1.03
  -4   0  10   18.03    2.27
  -4   0   9    2.16    1.21
  -4   0   8  190.30    5.91
  -4   0   7   -0.13    0.94
  -4   0   6  138.19    4.52
  -4   0   5    0.12    0.61
  -4   0   4  252.89    5.53
  -4   0   3    1.27    0.82
  -4   0   2  220.93    5.10
  -4   0   1   -0.05    0.63
  -4   0   0  460.72    7.84
   4   0   1    1.19    0.80
   4   0   2  217.94    5.66
   4   0   3    0.13    0.72
   4   0   4  205.56    6.25
   4   0   5   -1.09    1.15
   4   0   6   24.84    2.51
   4   0   7   -0.09    1.46
   4   0   8  156.81    6.61
   4   0   9    0.51    2.08
   4   0  10  291.14    9.68
   4   0  11   -0.26    1.40
   4   0  12   39.31    3.98
   4   0  13    0.38    1.74
   4   0  14   76.14    5.96
   4   0  15    2.09    2.21
   4   0  16   10.71    2.99
   4   0  17    0.04    2.02
   4   0  18   -1.41    1.71
   4   0  19    1.01    2.22
   4   0  20    2.64    3.20
   4   0  21   -2.23    2.23
   4   0  22    3.22    2.82
  -4  -1  25    1.31    2.42
  -4   1  25    1.48    2.52
  -4  -1  24    3.38    2.50
  -4   1  24    2.04    2.42
  -4  -1  23    1.26    2.07
  -4   1  23    0.12    2.02
  -4  -1  22    2.92    2.91
  -4   1  22    1.26    2.82
  -4  -1  21   -0.45    2.45
  -4   1  21    0.17    1.95
  -4  -1  20    1.85    2.02
  -4   1  20    1.27    1.96
  -4  -1  19    3.08    1.99
  -4   1  19    1.99    1.90
  -4  -1  18   -1.76    1.35
  -4   1  18   -2.63    1.85
  -4  -1  17   -1.63    2.02
  -4   1  17   -0.58    1.49
  -4  -1  16   20.26    3.19
  -4   1  16   18.76    3.06
  -4  -1  15   48.76    4.44
  -4   1  15   46.28    4.30
  -4  -1  14   45.07    4.06
  -4   1  14   48.85    4.32
  -4  -1  13    1.66    1.73
  -4   1  13    2.09    1.36
  -4  -1  12   10.47    2.02
  -4   1  12    7.49    1.85
  -4  -1  11   25.21    2.72
  -4   1  11   21.01    2.54
  -4  -1  10  188.16    6.56
  -4   1  10  198.24    6.86
  -4  -1   9  103.31    4.62
  -4   1   9   92.79    4.62
  -4  -1   8    5.92    1.45
  -4   1   8    4.24    1.22
  -4  -1   7    6.73    1.32
  -4   1   7    5.20    1.37
  -4  -1   6    0.83    0.94
  -4   1   6    0.75    1.01
  -4  -1   5    3.97    1.03
  -4   1   5    2.94    1.07
  -4  -1   4   55.73    2.51
  -4   1   4   47.45    2.49
  -4  -1   3   17.27    1.44
  -4   1   3   14.22    1.53
  -4  -1   2   20.69    1.59
  -4   1   2   15.31    1.63
  -4  -1   1  161.22    4.14
  -4   1   1  155.77    4.54
  -4  -1   0  382.01    6.69
  -4   1   0  382.25    7.30
  -4   1  -1  325.76    6.95
   4   1   1  343.02    6.75
   4  -1   2  210.94    5.96
   4   1   2  198.60    5.22
   4  -1   3   17.20    2.01
   4   1   3   16.45    1.85
   4  -1   4   38.07    2.80
   4   1   4   40.28    2.73
   4  -1   5    1.14    1.14
   4   1   5    1.57    1.08
   4  -1   6   50.74    3.48
   4   1   6   54.60    3.51
   4  -1   7   42.60    3.34
   4   1   7   44.90    3.38
   4  -1   8   58.26    4.14
   4   1   8   68.20    4.36
   4  -1   9    1.44    1.67
   4   1   9    1.23    1.57
   4  -1  10    2.61    1.78
   4   1  10    4.47    2.36
   4  -1  11    0.49    1.60
   4   1  11   -0.91    1.27
   4  -1  12    0.79    1.55
   4   1  12    1.83    1.61
   4  -1  13    3.64    2.43
   4   1  13    4.59    2.05
   4  -1  14   35.05    4.64
   4   1  14   37.66    4.30
   4  -1  15   27.06    4.09
   4   1  15   20.36    3.56
   4  -1  16   34.82    4.47
   4   1  16   31.78    4.32
   4  -1  17   -3.10    1.72
   4   1  17   -3.07    2.30
   4  -1  18   -3.24    2.44
   4   1  18   -1.90    1.65
   4  -1  19    3.22    3.17
   4   1  19    6.86    2.88
   4  -1  20    0.72    2.99
   4   1  20    0.78    2.95
   4  -1  21   -1.54    2.47
   4   1  21   -0.34    3.00
   4  -1  22   -0.35    2.41
   4   1  22   -0.76    2.27
  -4  -2  25    2.28    2.67
  -4   2  25    0.58    3.09
  -4  -2  24    0.50    2.23
  -4   2  24    0.57    2.11
  -4  -2  23   -0.42    1.85
  -4   2  23    0.90    2.12
  -4  -2  22    1.44    2.10
  -4   2  22   -0.04    2.59
  -4  -2  21    5.85    3.09
  -4   2  21    5.19    2.57
  -4  -2  20    2.00    2.53
  -4   2  20    0.86    2.64
  -4  -2  19   -0.36    1.67
  -4   2  19   -0.29    1.56
  -4  -2  18    1.94    2.39
  -4   2  18    2.87    1.95
  -4  -2  17   12.71    2.77
  -4   2  17   10.73    3.02
  -4  -2  16    4.36    2.35
  -4   2  16    6.76    2.65
  -4  -2  15   59.45    4.96
  -4   2  15   56.80    4.74
  -4  -2  14    4.20    2.09
  -4   2  14    0.29    1.39
  -4  -2  13   18.83    2.74
  -4   2  13   16.96    2.52
  -4  -2  12   10.50    2.00
  -4   2  12   14.92    2.37
  -4  -2  11   51.46    3.71
  -4   2  11   51.09    3.82
  -4  -2  10   63.10    3.85
  -4   2  10   68.87    4.20
  -4  -2   9  389.38    8.74
  -4   2   9  376.45    9.18
  -4  -2   8   14.69    1.71
  -4   2   8   12.45    1.83
  -4  -2   7   18.34    1.73
  -4   2   7   21.67    2.08
  -4  -2   6    4.39    1.07
  -4   2   6    4.13    1.09
  -4  -2   5  119.78    3.69
  -4   2   5  119.34    4.25
  -4  -2   4   55.24    2.40
  -4   2   4   49.76    2.67
  -4  -2   3  292.48    5.27
  -4   2   3  286.44    6.25
  -4  -2   2    0.28    0.64
  -4   2   2    1.22    0.77
  -4  -2   1  143.20    3.65
  -4   2   1  142.82    4.53
  -4   2   0  206.76    5.56
  -4   2  -1  161.80    5.09
   4   2   1  156.31    4.20
   4  -2   2    2.45    1.04
   4   2   2    3.58    1.04
   4  -2   3  137.87    5.00
   4   2   3  130.24    4.38
   4  -2   4   64.87    3.64
   4   2   4   62.22    3.19
   4  -2   5   81.45    4.42
   4   2   5   79.33    3.92
   4  -2   6   12.45    2.03
   4   2   6   13.56    1.93
   4  -2   7   17.69    2.35
   4   2   7   17.67    2.22
   4  -2   8    0.15    1.31
   4   2   8    1.23    1.26
   4  -2   9  459.53   11.94
   4   2   9  443.39   11.33
   4  -2  10    9.27    2.28
   4   2  10    6.08    2.37
   4  -2  11  107.32    6.33
   4   2  11   93.75    5.72
   4  -2  12   -1.01    2.06
   4   2  12    1.81    1.55
   4  -2  13   25.61    3.56
   4   2  13   24.98    3.42
   4  -2  14   28.25    4.02
   4   2  14   28.53    4.08
   4  -2  15   38.23    4.67
   4   2  15   49.56    5.27
   4  -2  16    2.11    3.03
   4   2  16    4.34    2.32
   4  -2  17   -0.94    2.55
   4   2  17   -1.04    1.81
   4  -2  18   -0.57    2.68
   4   2  18   -2.56    2.36
   4  -2  19    3.31    2.52
   4   2  19    5.95    3.44
   4  -2  20    2.23    2.61
   4   2  20    5.70    2.94
   4  -2  21    1.15    2.61
   4   2  21    3.73    3.29
   4  -2  22    2.12    2.92
   4   2  22   -1.11    2.32
  -4  -3  25    8.63    3.26
  -4   3  25    7.10    3.90
  -4  -3  24    0.29    2.07
  -4   3  24   -0.41    2.05
  -4  -3  23    0.20    1.95
  -4   3  23    1.41    2.19
  -4  -3  22    0.70    1.99
  -4   3  22   -2.62    2.54
  -4  -3  21    8.01    3.35
  -4   3  21    7.03    2.80
  -4  -3  20   19.50    3.91
  -4   3  20   14.14    3.62
  -4  -3  19    0.90    1.85
  -4   3  19    0.97    2.38
  -4  -3  18   10.09    2.62
  -4   3  18   10.24    2.64
  -4  -3  17   11.90    2.91
  -4   3  17   10.03    2.59
  -4  -3  16    3.78    1.81
  -4   3  16    5.73    2.13
  -4  -3  15   61.19    4.76
  -4   3  15   62.41    5.15
  -4  -3  14    5.95    1.80
  -4   3  14    7.08    2.07
  -4  -3  13   33.95    3.27
  -4   3  13   30.23    3.46
  -4  -3  12    2.55    1.33
  -4   3  12    2.14    1.42
  -4  -3  11  148.32    6.05
  -4   3  11  146.96    6.39
  -4  -3  10    1.48    1.21
  -4   3  10    3.50    1.85
  -4  -3   9   86.28    4.24
  -4   3   9   85.48    4.56
  -4  -3   8    5.46    1.18
  -4   3   8    6.02    1.80
  -4  -3   7    3.70    1.07
  -4   3   7    3.41    1.18
  -4  -3   6   -0.09    0.73
  -4   3   6    0.34    0.81
  -4  -3   5   81.19    2.91
  -4   3   5   74.70    3.47
  -4  -3   4   17.01    1.30
  -4   3   4   15.36    1.79
  -4  -3   3   75.21    2.45
  -4   3   3   70.79    3.22
  -4  -3   2   37.56    1.75
  -4   3   2   35.61    2.46
  -4  -3   1  125.20    3.18
  -4   3   1  125.51    4.43
  -4   3   0   76.70    3.48
   4   3   0   77.60    2.67
  -4   3  -1  184.75    5.63
   4   3   1  187.24    4.40
   4  -3   2   16.56    1.88
   4   3   2   15.64    1.55
   4  -3   3    0.23    0.93
   4   3   3    0.29    0.85
   4  -3   4   34.13    2.78
   4   3   4   35.19    2.49
   4  -3   5   17.36    2.40
   4   3   5   14.34    1.81
   4  -3   6   21.17    2.71
   4   3   6   17.94    2.38
   4   3   7    0.90    1.06
   4  -3   8   26.56    3.21
   4   3   8   23.69    2.85
   4  -3   9    1.42    1.68
   4   3   9    2.97    1.50
   4  -3  10    1.75    1.67
   4   3  10    1.84    1.60
   4  -3  11   19.99    3.12
   4   3  11   19.63    2.87
   4  -3  12   -0.13    1.72
   4   3  12    1.20    1.51
   4  -3  13   -0.82    1.58
   4   3  13    3.62    2.32
   4  -3  14    1.16    2.76
   4   3  14    4.60    2.54
   4  -3  15   34.97    4.59
   4   3  15   35.98    4.28
   4  -3  16    1.52    2.08
   4   3  16    0.90    1.80
   4  -3  17    2.82    2.44
   4   3  17    4.11    2.86
   4  -3  18    7.85    2.93
   4   3  18    9.76    3.03
   4  -3  19    0.55    2.19
   4   3  19    3.13    3.03
   4  -3  20    2.27    2.49
   4   3  20    3.01    2.50
   4  -3  21    0.42    2.47
   4   3  21    0.16    2.29
   4  -3  22   -0.21    2.48
   4   3  22   -1.01    3.07
  -4  -4  25    6.47    3.45
  -4   4  25    8.13    3.89
  -4  -4  24    1.87    2.32
  -4   4  24    3.84    2.66
  -4  -4  23    7.97    2.84
  -4   4  23    4.33    3.30
  -4  -4  22    2.07    2.21
  -4   4  22    0.34    2.13
  -4  -4  21    2.02    2.70
  -4   4  21    0.84    2.13
  -4  -4  20    2.46    2.58
  -4   4  20   -1.07    1.76
  -4  -4  19    4.66    2.69
  -4   4  19    6.35    2.95
  -4  -4  18   -0.03    1.61
  -4   4  18    0.10    2.27
  -4  -4  17   41.31    4.51
  -4   4  17   45.95    4.96
  -4  -4  16   26.11    3.41
  -4   4  16   27.02    3.91
  -4  -4  15   20.02    3.17
  -4   4  15   13.82    2.74
  -4  -4  14   11.51    2.19
  -4   4  14    8.79    2.51
  -4  -4  13   11.60    2.09
  -4   4  13   15.81    2.79
  -4  -4  12   30.94    2.98
  -4   4  12   29.35    3.37
  -4  -4  11   92.06    4.80
  -4   4  11   84.84    4.95
  -4  -4  10   29.66    2.82
  -4   4  10   28.23    3.15
  -4  -4   9  166.21    5.61
  -4   4   9  173.10    6.58
  -4  -4   8  397.37    8.24
  -4   4   8  414.14    9.62
  -4  -4   7  141.70    4.43
  -4   4   7  132.38    5.22
  -4  -4   6   27.77    1.94
  -4   4   6   20.67    2.19
  -4  -4   5  122.66    3.49
  -4   4   5  110.58    4.34
  -4  -4   4   78.27    2.46
  -4   4   4   78.37    3.57
  -4  -4   3  105.62    2.69
  -4   4   3   94.81    3.91
  -4   4   2   77.08    3.59
  -4  -4   1   61.38    2.03
  -4   4   1   58.05    3.18
  -4   4   0   46.00    2.81
   4   4   0   40.96    1.83
  -4   4  -1    5.73    1.29
   4   4   1    3.56    0.84
  -4   4  -2   25.57    2.31
   4   4   2   22.99    1.68
   4  -4   3   10.75    1.90
   4   4   3   10.11    1.24
   4  -4   4   35.16    2.88
   4   4   4   34.70    2.37
   4  -4   5  149.42    5.97
   4   4   5  157.83    5.31
   4  -4   6   10.65    1.98
   4   4   6    8.30    1.64
   4  -4   7    4.13    1.85
   4   4   7    4.43    1.36
   4  -4   8   98.95    5.58
   4   4   8  103.81    5.16
   4  -4   9   18.77    2.73
   4   4   9   21.27    2.89
   4  -4  10  163.68    7.73
   4   4  10  169.60    7.31
   4  -4  11    2.13    2.28
   4   4  11    2.38    1.58
   4  -4  12    6.24    2.28
   4   4  12    8.09    2.14
   4  -4  13   10.71    2.72
   4   4  13   14.58    3.02
   4  -4  14   39.78    4.58
   4   4  14   46.06    4.57
   4  -4  15   18.91    3.97
   4   4  15   13.52    2.90
   4  -4  16    2.86    2.35
   4   4  16    3.62    2.55
   4  -4  17   -0.80    2.01
   4   4  17    1.90    2.05
   4  -4  18    0.18    2.14
   4   4  18   -3.27    2.37
   4  -4  19    6.01    2.98
   4   4  19    8.59    3.03
   4  -4  20    5.13    3.04
   4   4  20    6.15    3.42
   4   4  21    6.55    3.07
   4  -4  22    0.08    2.66
   4   4  22    1.07    3.26
  -4  -5  25    5.69    3.48
  -4   5  25    5.85    3.73
  -4  -5  24    3.38    3.37
  -4   5  24    6.87    3.07
  -4  -5  23    0.44    2.21
  -4   5  23    0.64    2.92
  -4  -5  22    1.90    2.08
  -4   5  22   -1.72    1.75
  -4  -5  21   16.06    3.81
  -4   5  21   11.18    3.67
  -4  -5  20    8.48    3.15
  -4   5  20    9.71    3.04
  -4  -5  19   61.73    5.80
  -4   5  19   38.04    4.73
  -4  -5  18    3.34    2.41
  -4   5  18    1.16    1.92
  -4  -5  17   14.31    2.79
  -4   5  17   13.31    2.97
  -4  -5  16   29.22    3.76
  -4   5  16   23.08    3.55
  -4  -5  15    1.46    1.48
  -4   5  15   -0.82    2.05
  -4  -5  14   28.67    3.35
  -4   5  14   27.05    3.41
  -4  -5  13   -0.18    1.41
  -4   5  13    0.62    1.31
  -4  -5  12   36.80    3.33
  -4   5  12   35.51    3.70
  -4  -5  11  105.04    5.04
  -4   5  11   93.23    5.31
  -4  -5  10  374.46    8.89
  -4   5  10  377.97   10.35
  -4  -5   9   22.01    2.34
  -4   5   9   24.62    2.99
  -4  -5   8   88.58    3.82
  -4   5   8   81.62    4.41
  -4  -5   7   11.16    1.47
  -4   5   7    8.29    1.57
  -4  -5   6  151.66    4.04
  -4   5   6  144.18    5.33
  -4  -5   5   15.10    1.23
  -4   5   5   14.22    1.79
  -4  -5   4  131.92    3.04
  -4   5   4  133.42    4.85
  -4   5   3   10.07    1.47
  -4   5   2   64.09    3.32
  -4   5   1    9.58    1.67
  -4   5   0  134.29    4.99
   4   5   0  132.05    3.01
  -4   5  -1   40.43    2.84
   4   5   1   38.37    1.84
  -4   5  -2   98.82    4.43
   4   5   2   96.40    3.18
   4  -5   3   37.38    2.95
   4   5   3   33.87    2.18
   4  -5   4    0.61    1.00
   4   5   4   -0.41    0.96
   4  -5   5    9.75    1.85
   4   5   5   11.35    1.64
   4  -5   6  148.30    6.28
   4   5   6  145.96    5.39
   4  -5   7    4.37    1.91
   4   5   7    5.63    1.67
   4  -5   8   67.88    4.84
   4   5   8   60.28    3.93
   4  -5   9    1.70    1.47
   4   5   9    2.04    1.38
   4  -5  10   22.32    3.39
   4   5  10   18.60    2.61
   4  -5  11   11.62    2.58
   4   5  11   10.28    2.51
   4  -5  12   76.17    5.97
   4   5  12   67.83    4.98
   4  -5  13   -1.15    1.55
   4   5  13   -0.50    1.90
   4  -5  14   13.93    3.17
   4   5  14   15.14    2.88
   4  -5  15   -0.10    2.14
   4   5  15    2.64    2.43
   4  -5  16   10.11    3.58
   4   5  16   15.46    3.20
   4  -5  17    3.52    2.49
   4   5  17    4.68    2.84
   4  -5  18   -0.14    2.20
   4   5  18   -2.06    1.69
   4  -5  19    9.80    3.28
   4   5  19    9.33    3.48
   4  -5  20    1.46    2.63
   4   5  20    1.83    2.43
   4  -5  21    1.81    2.83
   4   5  21    5.09    3.37
   4  -5  22    3.21    2.94
   4   5  22    1.50    2.71
  -4  -6  25    2.16    3.35
  -4   6  25    3.36    3.58
  -4  -6  24    5.90    3.41
  -4   6  24    5.10    2.83
  -4  -6  23   -0.76    2.64
  -4   6  23    2.27    3.15
  -4  -6  22   -1.59    2.51
  -4   6  22    1.86    2.30
  -4  -6  21   -0.43    2.37
  -4   6  21    1.16    2.78
  -4  -6  20    3.19    2.57
  -4   6  20    3.78    2.93
  -4  -6  19    5.14    2.67
  -4   6  19    3.08    2.23
  -4  -6  18   38.65    4.57
  -4   6  18   36.50    4.55
  -4  -6  17    0.08    1.94
  -4   6  17    1.11    2.40
  -4  -6  16   46.62    4.30
  -4   6  16   43.62    4.82
  -4  -6  15    2.44    1.93
  -4   6  15    1.31    1.73
  -4  -6  14    7.82    1.87
  -4   6  14    7.86    2.22
  -4  -6  13   -1.13    1.32
  -4   6  13    0.09    1.33
  -4  -6  12   29.43    3.01
  -4   6  12   36.52    3.79
  -4  -6  11    2.61    1.59
  -4   6  11    0.78    1.47
  -4  -6  10  194.81    6.36
  -4   6  10  211.04    7.95
  -4  -6   9  194.37    5.90
  -4   6   9  206.68    7.43
  -4  -6   8  163.74    5.04
  -4   6   8  157.69    6.16
  -4  -6   7  148.53    4.38
  -4   6   7  153.14    5.83
  -4  -6   6  247.43    5.20
  -4   6   6  239.77    7.10
  -4  -6   5   36.27    1.78
  -4   6   5   32.99    2.73
  -4  -6   4  201.75    3.60
  -4   6   4  194.33    5.97
  -4   6   2  119.93    4.65
  -4   6   1   29.42    2.43
  -4   6   0   42.63    2.93
   4   6   0   43.89    1.56
  -4   6  -1   33.10    2.62
   4   6   1   36.31    1.75
  -4   6  -2   13.53    1.88
   4   6   2   11.56    1.22
   4  -6   3    0.12    1.09
   4   6   3    2.07    0.93
   4  -6   4   39.88    3.37
   4   6   4   37.57    2.45
   4  -6   5    7.55    2.02
   4   6   5    7.59    1.60
   4  -6   6  104.05    5.38
   4   6   6   95.93    4.38
   4  -6   7   -0.92    1.51
   4   6   7    0.07    1.28
   4  -6   8   18.34    2.71
   4   6   8   16.03    2.18
   4  -6   9   17.05    2.87
   4   6   9   17.50    2.39
   4  -6  10   15.27    2.67
   4   6  10   13.78    2.33
   4  -6  11    1.08    1.66
   4   6  11    0.68    1.84
   4  -6  12    1.73    1.90
   4   6  12    4.58    1.79
   4  -6  13    0.07    1.85
   4   6  13   -0.49    2.00
   4  -6  14   41.17    5.06
   4   6  14   33.03    3.89
   4  -6  15   -1.21    1.88
   4   6  15    0.16    1.66
   4  -6  16    0.73    2.00
   4   6  16    1.23    2.46
   4  -6  17    8.19    3.60
   4   6  17    8.37    2.77
   4  -6  18   -0.79    2.03
   4   6  18    0.52    2.74
   4  -6  19   -0.17    2.18
   4   6  19    1.43    2.22
   4  -6  20   16.82    4.09
   4   6  20   14.30    3.55
   4  -6  21    0.97    2.73
   4   6  21    1.75    3.13
   4  -6  22   12.84    3.92
   4   6  22    9.21    3.53
  -4  -7  25   10.92    4.12
  -4   7  25    6.38    3.19
  -4  -7  24    9.73    3.84
  -4   7  24    4.95    2.91
  -4  -7  23   -0.30    2.77
  -4   7  23    0.13    2.89
  -4  -7  22    3.44    2.98
  -4   7  22    3.87    2.54
  -4  -7  21    1.74    2.61
  -4   7  21    2.38    2.31
  -4  -7  20   29.10    4.41
  -4   7  20   18.69    3.71
  -4  -7  19    1.48    2.38
  -4   7  19    5.00    2.93
  -4  -7  18   47.16    4.93
  -4   7  18   47.44    5.34
  -4  -7  17    1.66    2.10
  -4   7  17    2.56    2.04
  -4  -7  16   11.32    2.71
  -4   7  16   10.83    2.72
  -4  -7  15    1.43    1.43
  -4   7  15   -0.32    1.63
  -4  -7  14    8.16    2.24
  -4   7  14   11.16    2.81
  -4  -7  13   11.49    2.26
  -4   7  13   15.19    2.63
  -4  -7  12   43.50    3.56
  -4   7  12   45.42    4.11
  -4  -7  11   87.03    4.62
  -4   7  11   85.94    5.35
  -4  -7  10   26.79    2.66
  -4   7  10   25.35    3.28
  -4  -7   9    2.13    1.04
  -4   7   9    1.44    1.84
  -4  -7   8   53.56    2.93
  -4   7   8   47.22    3.56
  -4  -7   7   91.62    3.39
  -4   7   7   89.72    4.59
  -4  -7   6    9.56    1.24
  -4   7   6    8.02    1.79
  -4  -7   5   17.53    1.27
  -4   7   5   14.74    1.94
  -4  -7   4   66.18    1.92
  -4   7   4   65.66    3.60
  -4   7   3   94.56    4.31
  -4   7   2    4.28    1.47
  -4   7   1   -0.39    1.09
  -4   7   0    1.12    1.00
   4   7   0    1.87    0.50
  -4   7  -1   20.11    2.34
   4   7   1   22.47    1.36
  -4   7  -2   30.24    2.69
   4   7   2   28.33    1.78
   4  -7   3    1.12    1.19
   4   7   3    2.51    0.88
   4  -7   4   24.92    2.93
   4   7   4   25.63    2.11
   4  -7   5   35.07    3.34
   4   7   5   36.93    2.69
   4  -7   6    2.00    1.43
   4   7   6   -0.40    0.80
   4  -7   7   31.44    3.29
   4   7   7   35.20    2.82
   4  -7   8   -1.42    1.25
   4   7   8   -1.18    1.22
   4  -7   9    0.40    1.41
   4   7   9   -0.57    1.44
   4  -7  10    4.70    1.98
   4   7  10    3.39    1.85
   4  -7  11   76.00    5.71
   4   7  11   78.43    5.04
   4  -7  12   28.56    4.04
   4   7  12   21.42    2.95
   4  -7  13    0.53    2.51
   4   7  13   -1.44    1.76
   4  -7  14   -0.87    1.81
   4   7  14    0.46    1.67
   4  -7  15   10.90    3.04
   4   7  15   10.99    2.72
   4  -7  16    2.58    2.35
   4   7  16    3.05    2.55
   4  -7  17   -0.21    2.76
   4   7  17   -0.74    2.44
   4  -7  18   14.97    4.26
   4   7  18   10.74    3.07
   4  -7  19    0.79    2.39
   4   7  19   -0.53    1.92
   4  -7  20   13.28    3.76
   4   7  20   11.87    3.84
   4  -7  21   -0.06    2.52
   4   7  21   -0.94    2.27
   4  -7  22    2.38    2.86
   4   7  22    2.15    3.37
  -4  -8  25    2.94    2.77
  -4   8  25    5.80    3.21
  -4  -8  24    2.90    2.61
  -4   8  24    2.43    2.63
  -4  -8  23   -0.27    2.76
  -4   8  23    2.33    2.46
  -4  -8  22    1.86    2.90
  -4   8  22   -1.76    2.66
  -4  -8  21    4.72    2.85
  -4   8  21    1.92    2.30
  -4  -8  20    4.78    2.27
  -4   8  20    2.58    2.42
  -4  -8  19    2.49    1.96
  -4   8  19    4.78    2.46
  -4  -8  18    2.11    1.81
  -4   8  18    1.31    1.95
  -4  -8  17   48.31    4.56
  -4   8  17   41.67    4.65
  -4  -8  16   -0.88    1.83
  -4   8  16   -0.01    1.64
  -4  -8  15   26.15    3.44
  -4   8  15   27.56    3.99
  -4  -8  14    1.81    1.77
  -4   8  14    3.71    1.94
  -4  -8  13    9.41    1.92
  -4   8  13    8.64    2.64
  -4  -8  12    4.11    1.73
  -4   8  12    4.47    1.78
  -4  -8  11   95.94    4.82
  -4   8  11  105.45    5.95
  -4  -8  10   46.76    3.24
  -4   8  10   44.93    4.11
  -4  -8   9  124.83    4.76
  -4   8   9  123.26    6.06
  -4  -8   8   97.44    3.88
  -4   8   8   84.09    4.76
  -4  -8   7   86.54    3.31
  -4   8   7   89.80    4.73
  -4  -8   6   70.80    2.65
  -4   8   6   66.38    4.04
  -4  -8   5  248.55    4.39
  -4   8   5  242.44    7.27
  -4   8   4    4.09    1.25
  -4   8   3  103.49    4.66
  -4   8   2    1.30    0.99
  -4   8   1   12.17    1.76
  -4   8   0   24.49    2.50
   4   8   0   23.82    1.12
  -4   8  -1   29.58    2.64
   4   8   1   31.32    1.56
  -4   8  -2   71.17    4.21
   4   8   2   73.60    2.70
  -4   8  -3    1.45    1.25
   4   8   3    1.22    0.81
   4  -8   4   61.67    4.14
   4   8   4   59.42    2.98
   4  -8   5   90.36    4.94
   4   8   5   91.89    3.91
   4  -8   6   11.84    2.16
   4   8   6    9.10    1.75
   4  -8   7    2.61    1.48
   4   8   7    1.89    1.34
   4  -8   8   16.09    2.64
   4   8   8   16.46    2.36
   4  -8   9    5.27    1.90
   4   8   9    3.32    1.68
   4  -8  10    1.83    1.65
   4   8  10    0.47    1.61
   4  -8  11    4.02    2.08
   4   8  11    1.80    1.93
   4  -8  12   12.27    2.76
   4   8  12   11.88    2.67
   4  -8  13   14.00    3.16
   4   8  13   11.46    2.92
   4  -8  14   -0.47    2.05
   4   8  14   -0.02    2.20
   4  -8  15    2.37    3.04
   4   8  15    1.39    1.77
   4  -8  16   27.07    4.33
   4   8  16   24.56    3.80
   4  -8  17    3.07    2.37
   4   8  17   -0.02    1.87
   4  -8  18   21.91    4.68
   4   8  18   18.62    3.98
   4  -8  19    5.68    3.00
   4   8  19    8.16    3.14
   4  -8  20    4.26    2.92
   4   8  20    3.00    2.61
   4  -8  21    9.78    3.65
   4   8  21    6.65    3.59
   4  -8  22    1.22    2.78
   4   8  22    0.80    3.21
  -4  -9  25    6.77    3.84
  -4   9  25    8.87    3.82
  -4  -9  24   -0.42    2.36
  -4   9  24    2.44    3.34
  -4  -9  23    7.03    3.29
  -4   9  23    6.00    2.92
  -4  -9  22   -3.98    2.39
  -4   9  22   -1.86    2.62
  -4  -9  21    8.20    3.24
  -4   9  21    7.91    3.41
  -4  -9  20    2.09    1.90
  -4   9  20    2.01    2.30
  -4  -9  19   19.56    3.35
  -4   9  19   19.95    3.74
  -4  -9  18    1.79    1.74
  -4   9  18    4.26    2.83
  -4  -9  17   15.27    2.87
  -4   9  17   17.00    3.46
  -4  -9  16    1.20    1.54
  -4   9  16    2.18    1.91
  -4  -9  15   26.44    3.22
  -4   9  15   23.69    3.72
  -4  -9  14   -0.89    1.11
  -4   9  14   -2.24    1.38
  -4  -9  13   42.06    3.72
  -4   9  13   48.23    4.49
  -4  -9  12   12.72    2.19
  -4   9  12   13.05    2.51
  -4  -9  11   73.02    4.26
  -4   9  11   66.28    4.84
  -4  -9  10   64.94    3.69
  -4   9  10   68.32    4.91
  -4  -9   9   19.72    2.09
  -4   9   9   20.47    2.97
  -4  -9   8  196.29    5.52
  -4   9   8  174.08    6.87
  -4  -9   7   32.65    2.21
  -4   9   7   29.15    2.92
  -4  -9   6   37.57    2.01
  -4   9   6   40.48    3.22
  -4  -9   5   35.96    1.66
  -4   9   5   34.52    3.07
  -4   9   4   20.31    2.43
  -4   9   3  175.44    6.25
  -4   9   2    9.46    1.69
  -4   9   1   51.03    3.36
  -4   9   0   18.80    2.22
  -4   9  -1   22.75    2.41
   4   9   1   27.70    1.52
  -4   9  -2   54.27    3.70
   4   9   2   58.37    2.43
  -4   9  -3   23.87    2.84
   4   9   3   24.51    1.84
   4  -9   4   32.15    3.12
   4   9   4   34.31    2.33
   4  -9   5    5.93    1.70
   4   9   5    7.56    1.50
   4  -9   6   16.61    2.70
   4   9   6   12.90    1.91
   4  -9   7    2.57    1.49
   4   9   7    2.15    1.17
   4  -9   8   77.52    5.29
   4   9   8   77.70    4.43
   4  -9   9   14.37    2.61
   4   9   9   15.60    2.25
   4  -9  10   18.90    3.25
   4   9  10   15.99    2.44
   4  -9  11   38.76    4.22
   4   9  11   35.92    3.69
   4  -9  12   10.20    2.61
   4   9  12    9.11    2.57
   4  -9  13    1.85    1.95
   4   9  13    0.41    1.99
   4  -9  14   -1.02    1.97
   4   9  14   -1.42    2.01
   4  -9  15   23.70    4.43
   4   9  15   18.67    3.59
   4  -9  16    1.27    2.31
   4   9  16    0.86    1.83
   4  -9  17   15.54    3.69
   4   9  17   10.47    2.89
   4  -9  18    4.58    3.44
   4   9  18    1.99    2.16
   4  -9  19    5.41    3.09
   4   9  19    5.86    2.66
   4  -9  20    1.25    2.87
   4   9  20   -1.28    2.73
   4  -9  21    5.66    3.25
   4   9  21    2.08    3.17
   4  -9  22   -1.93    2.42
   4   9  22   -1.83    2.40
  -4 -10  25    0.98    3.34
  -4  10  25    3.69    3.11
  -4 -10  24   -0.98    2.76
  -4  10  24    3.63    3.53
  -4 -10  23    1.80    2.32
  -4  10  23    1.33    2.52
  -4 -10  22    0.58    2.73
  -4  10  22    1.65    2.42
  -4 -10  21    2.94    2.88
  -4  10  21    1.77    2.96
  -4 -10  20    0.65    2.34
  -4  10  20   -1.75    2.67
  -4 -10  19   10.61    2.70
  -4  10  19   11.51    3.51
  -4 -10  18    9.65    2.52
  -4  10  18   13.71    3.29
  -4 -10  17    0.78    1.54
  -4  10  17   -0.02    1.94
  -4 -10  16   30.00    3.87
  -4  10  16   30.83    4.19
  -4 -10  15    6.74    2.37
  -4  10  15   10.38    3.11
  -4 -10  14    6.11    2.12
  -4  10  14    3.87    2.56
  -4 -10  13   22.08    2.83
  -4  10  13   27.77    3.56
  -4 -10  12   29.42    2.86
  -4  10  12   27.22    3.38
  -4 -10  11   24.61    2.64
  -4  10  11   26.83    3.30
  -4 -10  10   31.22    2.69
  -4  10  10   29.33    3.28
  -4 -10   9   38.45    2.69
  -4  10   9   37.60    3.75
  -4 -10   8   65.29    3.21
  -4  10   8   59.18    4.20
  -4 -10   7  127.01    3.92
  -4  10   7  111.84    5.49
  -4 -10   6    2.64    0.98
  -4  10   6    2.53    1.38
  -4 -10   5  327.45    5.07
  -4  10   5  294.73    8.41
  -4  10   4   58.05    3.70
  -4  10   3   38.14    3.21
  -4  10   2  116.06    5.21
  -4  10   1   48.01    3.34
  -4  10   0   16.63    2.15
   4  10   0   16.53    1.00
  -4  10  -1   47.88    3.58
   4  10   1   48.69    2.02
  -4  10  -2    0.98    1.30
   4  10   2    0.59    0.81
  -4  10  -3  216.86    7.51
   4  10   3  201.68    5.06
   4 -10   4   -0.97    1.07
   4  10   4   -0.58    0.87
   4 -10   5   25.30    2.89
   4  10   5   25.12    2.29
   4 -10   6    1.94    1.42
   4  10   6   -0.52    1.19
   4 -10   7   48.63    4.15
   4  10   7   51.05    3.61
   4 -10   8    9.16    2.26
   4  10   8    6.76    1.92
   4 -10   9   31.37    3.68
   4  10   9   29.10    2.98
   4 -10  10    2.69    1.76
   4  10  10   -0.81    1.58
   4 -10  11   29.41    4.04
   4  10  11   24.18    3.01
   4 -10  12    0.66    1.66
   4  10  12   -0.29    1.33
   4 -10  13    0.25    1.85
   4  10  13    3.42    1.85
   4 -10  14    5.94    3.19
   4  10  14    2.96    2.48
   4 -10  15    9.93    3.12
   4  10  15   11.76    3.06
   4 -10  16    2.19    2.44
   4  10  16    3.21    2.64
   4 -10  17   44.53    5.61
   4  10  17   38.91    5.03
   4 -10  18    1.99    3.15
   4  10  18    3.10    2.76
   4 -10  19   11.01    3.65
   4  10  19   10.79    3.11
   4 -10  20    2.28    2.64
   4  10  20    3.17    2.45
   4 -10  21    3.39    3.70
   4  10  21    1.01    2.49
   4 -10  22    4.75    4.07
   4  10  22    4.24    2.94
  -4 -11  25   -0.46    2.41
  -4  11  25    4.02    2.99
  -4 -11  24    2.21    3.30
  -4  11  24    6.15    3.79
  -4 -11  23    2.38    2.35
  -4  11  23    1.79    2.63
  -4 -11  22    6.80    2.76
  -4  11  22    5.55    3.10
  -4 -11  21   -0.36    2.49
  -4  11  21   -1.70    1.84
  -4 -11  20    2.78    2.63
  -4  11  20    0.70    2.35
  -4 -11  19    2.36    1.95
  -4  11  19    4.37    2.54
  -4 -11  18    5.34    2.17
  -4  11  18    6.66    2.67
  -4 -11  17    5.12    2.44
  -4  11  17    6.82    2.62
  -4 -11  16   12.59    2.94
  -4  11  16   14.75    3.17
  -4 -11  15    0.99    2.03
  -4  11  15    2.57    2.03
  -4 -11  14   23.53    3.15
  -4  11  14   24.26    3.57
  -4 -11  13   13.82    2.41
  -4  11  13   12.99    2.71
  -4 -11  12   32.24    3.10
  -4  11  12   25.99    3.57
  -4 -11  11   12.46    2.04
  -4  11  11   12.80    2.85
  -4 -11  10   38.64    2.97
  -4  11  10   40.56    3.83
  -4 -11   9    4.06    1.27
  -4  11   9    4.17    1.74
  -4 -11   8    1.07    1.17
  -4  11   8    0.93    1.41
  -4 -11   7  234.12    5.38
  -4  11   7  226.03    8.00
  -4 -11   6   63.16    2.53
  -4  11   6   55.61    4.04
  -4 -11   5   22.15    1.37
  -4  11   5   22.16    2.74
  -4  11   4   62.71    3.95
  -4  11   3   61.00    3.90
  -4  11   2   98.22    4.88
  -4  11   1  253.48    7.71
  -4  11   0  103.22    5.05
   4  11   0  100.70    2.45
  -4  11  -1  172.23    6.54
   4  11   1  193.52    4.01
  -4  11  -2   52.10    3.85
   4  11   2   49.01    2.35
  -4  11  -3  199.89    7.42
   4  11   3  206.35    5.20
   4 -11   4   30.52    3.24
   4  11   4   33.13    2.34
   4 -11   5   11.89    2.17
   4  11   5   13.03    1.78
   4 -11   6   23.77    3.13
   4  11   6   27.88    2.57
   4 -11   7  161.17    7.53
   4  11   7  162.85    5.98
   4 -11   8   28.22    3.41
   4  11   8   26.24    2.91
   4 -11   9   66.00    5.23
   4  11   9   59.56    4.08
   4 -11  10   26.19    3.57
   4  11  10   22.10    2.80
   4 -11  11   26.06    3.63
   4  11  11   28.73    3.42
   4  11  12    2.66    1.60
   4 -11  13    4.04    2.86
   4  11  13    5.98    2.04
   4 -11  14   25.08    4.36
   4  11  14   16.20    3.24
   4 -11  15    0.32    2.11
   4  11  15   -0.65    2.18
   4 -11  16   16.50    3.77
   4  11  16   13.16    3.44
   4 -11  17    5.06    3.48
   4  11  17    2.19    2.76
   4 -11  18    6.62    3.64
   4  11  18    3.67    2.87
   4 -11  19    0.04    2.52
   4  11  19    2.11    2.77
   4 -11  20    3.66    3.52
   4  11  20    1.69    2.93
   4 -11  21   -0.09    3.56
   4  11  21   -5.07    2.76
  -4 -12  24    0.25    3.04
  -4  12  24    1.09    3.33
  -4 -12  23    4.11    3.27
  -4  12  23    2.37    3.46
  -4 -12  22    4.65    2.50
  -4  12  22    6.92    3.11
  -4 -12  21   -2.64    2.23
  -4  12  21   -0.48    2.01
  -4 -12  20   10.08    3.21
  -4  12  20    9.94    3.28
  -4 -12  19   -1.01    1.57
  -4  12  19   -2.12    2.56
  -4 -12  18    0.90    1.59
  -4  12  18    4.11    3.05
  -4 -12  17    6.24    2.62
  -4  12  17    9.79    2.81
  -4 -12  16    0.76    2.11
  -4  12  16    3.45    2.10
  -4 -12  15   12.80    2.47
  -4  12  15   17.21    3.25
  -4 -12  14    9.04    2.07
  -4  12  14    6.50    2.39
  -4 -12  13   -0.36    1.45
  -4  12  13   -0.75    2.07
  -4 -12  12   39.29    3.40
  -4  12  12   40.78    4.15
  -4 -12  11   29.07    2.80
  -4  12  11   32.88    3.82
  -4 -12  10   28.35    2.62
  -4  12  10   29.73    3.39
  -4 -12   9    8.49    1.67
  -4  12   9    9.85    2.27
  -4 -12   8   81.73    3.62
  -4  12   8   81.91    5.09
  -4 -12   7    1.72    1.12
  -4  12   7    1.38    1.53
  -4 -12   6  231.35    4.87
  -4  12   6  239.22    8.16
  -4 -12   5   13.46    1.16
  -4  12   5   10.53    2.02
  -4  12   4  138.70    5.91
  -4  12   3   81.21    4.57
  -4  12   2  103.60    5.23
  -4  12   1   30.60    2.88
  -4  12   0  163.36    6.46
   4  12   0  181.41    3.47
  -4  12  -1   38.56    3.29
   4  12   1   42.74    2.08
  -4  12  -2  193.16    7.22
   4  12   2  197.01    4.67
  -4  12  -3   66.59    4.48
   4  12   3   63.33    3.08
  -4  12  -4   60.36    4.41
   4  12   4   61.43    3.21
   4 -12   5   21.72    2.84
   4  12   5   22.73    2.22
   4 -12   6   39.83    3.89
   4  12   6   39.33    3.01
   4 -12   7    3.57    1.84
   4  12   7    1.45    1.43
   4 -12   8   80.46    5.72
   4  12   8   79.94    4.49
   4 -12   9    3.51    1.97
   4  12   9    4.09    1.87
   4 -12  10   85.06    6.29
   4  12  10   78.65    4.90
   4 -12  11    1.24    1.79
   4  12  11    2.96    1.55
   4 -12  12   15.34    3.46
   4  12  12   12.07    2.68
   4 -12  13    6.10    3.01
   4  12  13    5.25    2.02
   4 -12  14   19.49    4.06
   4  12  14   14.24    3.16
   4 -12  15    2.03    2.45
   4  12  15   -0.48    2.17
   4 -12  16   40.35    5.25
   4  12  16   41.13    4.71
   4 -12  17   14.29    4.25
   4  12  17    9.37    2.84
   4 -12  18   20.70    4.25
   4  12  18   16.58    3.61
   4 -12  19   -3.01    2.02
   4  12  19    1.51    2.25
   4 -12  20    3.28    3.57
   4  12  20    0.20    2.30
   4 -12  21    2.07    3.76
   4  12  21    0.26    2.30
  -4 -13  24    3.83    2.69
  -4  13  24    1.49    2.69
  -4 -13  23    1.00    2.88
  -4  13  23    0.77    3.23
  -4 -13  22    2.11    2.95
  -4  13  22    4.68    3.49
  -4 -13  21    0.57    1.81
  -4  13  21    6.31    3.69
  -4 -13  20   -0.74    2.35
  -4  13  20    0.82    3.03
  -4 -13  19    0.67    1.72
  -4  13  19    1.06    2.84
  -4 -13  18   18.62    3.19
  -4  13  18   20.20    3.89
  -4 -13  17    0.32    2.13
  -4  13  17    1.16    2.60
  -4 -13  16   11.03    2.76
  -4  13  16    9.69    2.79
  -4 -13  15   10.27    2.60
  -4  13  15   13.80    3.05
  -4 -13  14    6.65    2.15
  -4  13  14    5.26    2.75
  -4 -13  13    2.51    1.68
  -4  13  13    5.24    2.15
  -4 -13  12   14.90    2.36
  -4  13  12   15.72    2.86
  -4 -13  11    1.10    1.31
  -4  13  11    3.75    1.80
  -4 -13  10    3.58    1.52
  -4  13  10    2.21    1.58
  -4 -13   9   10.11    1.67
  -4  13   9    8.65    2.24
  -4 -13   8  150.14    4.88
  -4  13   8  139.97    6.81
  -4 -13   7    0.86    1.00
  -4  13   7   -0.71    1.34
  -4 -13   6  242.31    5.06
  -4  13   6  233.62    8.22
  -4 -13   5    6.11    0.95
  -4  13   5    2.45    1.49
  -4 -13   4   15.98    1.05
  -4  13   4   15.68    2.27
  -4  13   3    4.83    1.64
  -4  13   2  338.53    9.42
  -4  13   1    5.05    1.61
  -4  13   0  266.95    8.51
   4  13   0  274.21    4.52
  -4  13  -1   36.14    3.25
   4  13   1   38.77    2.01
  -4  13  -2  129.56    6.12
   4  13   2  143.50    4.22
  -4  13  -3   12.03    2.22
   4  13   3   13.63    1.61
  -4  13  -4   25.39    3.09
   4  13   4   27.24    2.25
   4 -13   5    8.40    2.06
   4  13   5    5.60    1.48
   4 -13   6   50.66    4.24
   4  13   6   48.11    3.38
   4 -13   7    1.69    1.74
   4  13   7    4.27    1.40
   4 -13   8  207.74    8.99
   4  13   8  209.90    7.40
   4 -13   9    5.91    2.65
   4  13   9    1.97    1.70
   4 -13  10    7.96    2.78
   4  13  10    5.74    2.09
   4 -13  11    1.14    1.69
   4  13  11    1.06    1.77
   4 -13  12    1.05    1.73
   4  13  12    1.50    1.52
   4 -13  13   -1.10    2.48
   4  13  13   -0.16    1.95
   4 -13  14    6.66    3.25
   4  13  14    1.27    2.23
   4 -13  15    9.58    3.08
   4  13  15   12.18    3.22
   4 -13  16    3.56    2.92
   4  13  16    3.45    2.22
   4 -13  17   10.34    4.10
   4  13  17    6.68    3.07
   4 -13  18    5.16    2.98
   4  13  18    2.95    2.92
   4 -13  19   -3.63    2.68
   4  13  19    2.42    2.90
   4 -13  20    0.51    3.49
   4  13  20    1.62    2.90
   4 -13  21   -1.79    2.45
   4  13  21   -1.26    2.82
  -4 -14  24    4.56    3.31
  -4  14  24    5.88    3.26
  -4 -14  23    2.67    2.36
  -4  14  23    3.57    2.94
  -4 -14  22    1.31    2.69
  -4  14  22   -0.72    2.98
  -4 -14  21    9.49    2.88
  -4  14  21   10.47    3.76
  -4 -14  20   -0.45    2.32
  -4  14  20    0.94    2.11
  -4 -14  19    8.22    3.09
  -4  14  19    6.81    2.86
  -4 -14  18    5.12    2.20
  -4  14  18    6.32    3.29
  -4 -14  17   -0.83    2.08
  -4  14  17    1.16    2.14
  -4 -14  16    6.41    2.05
  -4  14  16    4.19    2.40
  -4 -14  15    3.10    2.17
  -4  14  15    3.14    2.13
  -4 -14  14    1.94    1.89
  -4  14  14    0.48    1.78
  -4 -14  13   14.85    2.54
  -4  14  13   14.06    2.93
  -4 -14  12    9.87    2.11
  -4  14  12   17.00    3.35
  -4 -14  11    5.86    1.67
  -4  14  11    3.52    1.85
  -4 -14  10   23.84    2.55
  -4  14  10   19.94    3.26
  -4 -14   9    1.03    1.13
  -4  14   9    2.14    2.16
  -4 -14   8   88.68    3.82
  -4  14   8   80.86    5.29
  -4 -14   7   24.18    1.99
  -4  14   7   25.28    3.33
  -4 -14   6   -0.52    0.97
  -4  14   6    0.21    1.31
  -4 -14   5  126.85    3.29
  -4  14   5  117.64    5.91
  -4 -14   4   -0.26    0.59
  -4  14   4   -0.71    1.48
  -4  14   3   75.58    4.64
  -4  14   1   39.14    3.52
  -4  14   0   -0.08    1.58
   4  14   0   -0.64    0.67
  -4  14  -1  123.39    5.98
   4  14   1  121.60    3.55
  -4  14  -2  272.32    8.83
   4  14   2  303.20    6.28
  -4  14  -3  109.43    5.94
   4  14   3  119.18    4.22
  -4  14  -4   36.29    3.84
   4  14   4   44.79    2.82
   4 -14   5   24.27    3.09
   4  14   5   26.13    2.42
   4 -14   6   91.50    5.69
   4  14   6   92.96    4.58
   4 -14   7   24.82    3.35
   4  14   7   35.46    3.22
   4 -14   8   12.12    3.00
   4  14   8   10.51    2.29
   4 -14   9   98.12    6.56
   4  14   9   97.57    5.45
   4 -14  10    1.08    2.37
   4  14  10    1.35    1.81
   4 -14  11   33.09    4.21
   4  14  11   27.78    3.28
   4 -14  12   33.92    4.54
   4  14  12   37.58    4.14
   4 -14  13   15.22    3.74
   4  14  13   14.06    3.08
   4 -14  14    0.77    2.77
   4  14  14    0.32    1.73
   4 -14  15   28.55    4.85
   4  14  15   30.88    4.34
   4 -14  16   13.01    3.55
   4  14  16   12.35    3.02
   4 -14  17   28.34    5.27
   4  14  17   18.54    3.94
   4 -14  18    8.63    3.38
   4  14  18   10.09    2.94
   4 -14  19    2.79    3.55
   4  14  19    6.60    2.72
   4 -14  20   -0.09    2.52
   4  14  20   -1.78    1.79
   4 -14  21   -0.01    2.57
   4  14  21   -1.70    2.01
  -4  15  24    0.73    2.74
  -4 -15  23    3.04    3.06
  -4  15  23    1.96    2.74
  -4 -15  22   -1.16    1.74
  -4  15  22   -0.41    2.24
  -4 -15  21    3.99    2.92
  -4  15  21    6.59    3.07
  -4 -15  20   -0.42    1.71
  -4  15  20    1.61    2.45
  -4 -15  19   11.93    3.36
  -4  15  19   20.41    4.50
  -4 -15  18    4.49    2.16
  -4  15  18    5.43    2.70
  -4 -15  17   23.89    3.65
  -4  15  17   25.47    4.56
  -4 -15  16    0.79    1.52
  -4  15  16    1.07    2.64
  -4 -15  15    6.89    2.45
  -4  15  15    9.17    3.25
  -4 -15  14    5.14    2.17
  -4  15  14    7.66    2.54
  -4 -15  13   12.27    2.44
  -4  15  13   10.33    2.65
  -4 -15  12    1.49    1.50
  -4  15  12    1.71    1.87
  -4 -15  11   12.35    2.16
  -4  15  11   13.37    2.99
  -4 -15  10   15.14    2.28
  -4  15  10   17.03    2.90
  -4 -15   9   64.31    3.63
  -4  15   9   53.36    4.54
  -4 -15   8   -0.21    1.17
  -4  15   8   -0.26    1.38
  -4 -15   7  322.75    6.72
  -4  15   7  316.43   10.24
  -4 -15   6   10.74    1.43
  -4  15   6    5.53    1.77
  -4 -15   5   65.20    2.50
  -4  15   5   65.45    4.50
  -4 -15   4   17.15    1.21
  -4  15   4   15.67    2.57
  -4 -15   3   68.32    1.96
  -4  15   3   55.91    4.11
  -4  15   2   33.10    3.19
  -4  15   1   75.00    4.62
   4  15  -1   72.85    2.18
  -4  15   0    1.13    1.70
   4  15   0    1.73    0.76
  -4  15  -1  119.49    5.87
   4  15   1  119.63    3.67
   4  15   2   57.02    2.89
  -4  15  -3   25.48    3.05
   4  15   3   31.23    2.51
  -4  15  -4   14.17    2.79
   4  15   4   15.69    1.90
   4 -15   5   30.76    3.47
   4  15   5   31.34    2.68
   4 -15   6    5.14    1.93
   4  15   6    8.38    1.85
   4 -15   7   83.24    5.64
   4  15   7   85.47    4.74
   4 -15   8    5.92    2.62
   4  15   8    8.10    2.08
   4 -15   9   50.35    4.95
   4  15   9   53.25    4.24
   4 -15  10   -0.37    2.21
   4  15  10    0.44    1.29
   4 -15  11   16.90    3.23
   4  15  11   12.98    2.74
   4 -15  12    1.09    2.47
   4  15  12    2.14    2.15
   4 -15  13    4.59    2.95
   4  15  13    5.03    2.51
   4 -15  14   -1.50    2.67
   4  15  14    2.74    1.91
   4 -15  15    2.02    3.16
   4  15  15    0.51    1.72
   4 -15  16    8.19    3.36
   4  15  16    9.53    3.15
   4 -15  17    3.82    2.86
   4  15  17    3.08    2.74
   4 -15  18   -0.86    3.22
   4  15  18    0.17    1.95
   4 -15  19    0.06    2.47
   4  15  19   -1.21    2.47
   4 -15  20    0.29    2.55
   4  15  20   -0.33    2.84
   4 -15  21   -1.94    3.60
   4  15  21   -0.99    2.82
  -4  16  24    1.07    3.71
  -4  16  23    4.60    3.17
  -4  16  22   -1.13    2.38
  -4 -16  21    0.87    2.60
  -4  16  21    1.60    2.46
  -4 -16  20    2.42    2.09
  -4  16  20    5.87    3.64
  -4 -16  19    8.49    3.18
  -4  16  19    6.96    3.15
  -4 -16  18   -0.95    1.51
  -4  16  18    4.52    3.21
  -4 -16  17    5.97    2.49
  -4  16  17    6.92    2.79
  -4 -16  16    1.21    1.51
  -4  16  16    0.40    2.05
  -4 -16  15   -0.82    1.86
  -4  16  15    0.39    1.81
  -4 -16  14    0.67    1.88
  -4  16  14    0.79    1.97
  -4 -16  13   16.91    2.74
  -4  16  13   18.20    3.37
  -4 -16  12    1.77    1.51
  -4  16  12    2.91    1.95
  -4 -16  11   -0.37    1.33
  -4  16  11   -2.14    1.28
  -4 -16  10    5.47    1.62
  -4  16  10    8.86    2.42
  -4 -16   9  132.17    5.10
  -4  16   9  133.23    7.17
  -4 -16   8   28.14    2.43
  -4  16   8   24.77    3.49
  -4 -16   7    4.32    1.44
  -4  16   7   10.33    2.72
  -4 -16   6   53.53    2.60
  -4  16   6   37.96    3.69
  -4 -16   5   23.92    1.64
  -4  16   5   19.02    2.71
  -4 -16   4   16.92    1.32
  -4 -16   3   12.31    1.08
   4  16  -2   -0.11    0.57
   4  16  -1    1.85    0.70
   4  16   0   65.56    2.49
  -4  16  -1   98.02    5.41
   4  16   1  104.44    3.50
  -4  16  -2   40.97    3.70
   4  16   2   89.26    3.61
  -4  16  -3  105.96    5.91
   4  16   3  114.03    4.39
  -4  16  -4   35.67    3.67
   4  16   4   36.86    2.94
   4 -16   5  115.68    6.49
   4  16   5  135.87    5.32
   4 -16   6   23.26    3.55
   4  16   6   25.88    2.76
   4 -16   7  112.27    6.49
   4  16   7  119.49    5.57
   4 -16   8   31.01    4.08
   4  16   8   31.10    3.22
   4 -16   9    0.73    2.22
   4  16   9    0.46    1.61
   4 -16  10   33.77    4.40
   4  16  10   30.81    3.48
   4 -16  11   20.05    3.49
   4  16  11   17.48    2.72
   4 -16  12    1.37    2.65
   4  16  12    3.10    1.75
   4 -16  13   28.87    4.25
   4  16  13   24.06    3.38
   4 -16  14   15.88    3.52
   4  16  14   11.90    2.66
   4 -16  15    5.02    3.44
   4  16  15    6.84    2.81
   4 -16  16   14.72    4.41
   4  16  16   11.13    3.19
   4 -16  17   36.20    5.35
   4  16  17   24.25    3.89
   4 -16  18    1.26    3.42
   4  16  18    3.51    2.90
   4 -16  19    2.90    2.78
   4  16  19    4.25    2.95
   4 -16  20   -0.86    3.48
   4  16  20    0.57    2.09
   4 -16  21    3.59    3.25
   4  16  21    4.63    2.72
  -4  17  24    5.11    4.10
  -4  17  23    0.70    3.59
  -4  17  22    1.93    3.55
  -4  17  21    0.65    3.23
  -4  17  20   11.49    3.55
  -4 -17  19   18.69    3.76
  -4  17  19   11.58    3.53
  -4 -17  18   27.01    4.07
  -4  17  18   26.78    4.55
  -4 -17  17    9.04    2.82
  -4  17  17   14.02    3.88
  -4 -17  16    6.91    2.08
  -4  17  16    2.85    2.88
  -4 -17  15   -2.87    1.67
  -4  17  15   -1.86    2.41
  -4 -17  14    6.01    2.34
  -4  17  14   11.52    2.97
  -4 -17  13   16.74    2.75
  -4  17  13   18.25    3.79
  -4 -17  12   12.47    2.34
  -4  17  12    8.09    2.95
  -4 -17  11   -0.68    1.28
  -4  17  11   -1.68    1.51
  -4 -17  10    6.47    1.68
  -4  17  10    8.29    2.79
  -4 -17   9    3.83    1.71
  -4  17   9    5.48    2.59
  -4 -17   8  144.01    5.09
  -4  17   8  130.95    7.05
  -4 -17   7   13.38    1.75
  -4  17   7   14.31    2.70
  -4 -17   6  172.13    4.62
  -4  17   6  154.55    7.34
  -4 -17   5   18.46    1.56
  -4  17   5   19.35    3.05
  -4 -17   4  145.82    3.62
  -4  17   4  130.33    6.49
  -4 -17   3   28.71    1.59
  -4  17   3   27.35    3.34
  -4  17   2   13.35    2.31
   4  17  -2   18.98    1.32
  -4  17   1    5.22    2.08
   4  17  -1    5.92    0.99
  -4  17   0   70.08    4.74
   4  17   0   75.40    2.88
  -4  17  -1  107.48    5.77
   4  17   1  112.99    3.81
  -4  17  -2   33.77    3.45
   4  17   2   57.74    3.07
  -4  17  -3    9.52    2.22
   4  17   3   10.46    1.62
  -4  17  -4   63.34    4.91
   4  17   4   79.74    4.11
   4 -17   5    3.13    1.80
   4  17   5    3.43    1.54
   4 -17   6   48.27    4.51
   4  17   6   54.55    3.82
   4 -17   7    3.95    2.35
   4  17   7    4.71    1.85
   4 -17   8   40.07    4.32
   4  17   8   43.52    3.79
   4 -17   9   13.26    2.78
   4  17   9   20.90    2.93
   4 -17  10   30.29    4.00
   4  17  10   32.33    3.58
   4 -17  11    8.10    2.68
   4  17  11   10.59    2.62
   4 -17  12    9.56    2.85
   4  17  12   11.27    2.82
   4 -17  13    1.58    2.10
   4  17  13    2.09    1.70
   4 -17  14    0.63    2.14
   4  17  14    2.35    1.82
   4 -17  15    1.85    2.42
   4  17  15    1.12    1.73
   4 -17  16   -0.91    2.32
   4  17  16    0.50    2.38
   4 -17  17    0.86    3.32
   4  17  17    1.32    1.96
   4 -17  18   -0.69    2.41
   4  17  18    1.60    2.79
   4 -17  19    4.63    3.90
   4  17  19    4.14    2.56
   4 -17  20   -0.29    2.52
   4  17  20    3.57    3.16
  -4  18  23    4.92    3.81
  -4  18  22   -2.74    2.29
  -4  18  21   -1.58    2.38
  -4  18  20    2.33    2.75
  -4  18  19    2.51    3.36
  -4  18  18    9.05    3.29
  -4 -18  17    2.17    2.28
  -4  18  17    0.35    2.20
  -4 -18  16    1.69    1.63
  -4  18  16    1.55    2.14
  -4 -18  15    1.13    2.04
  -4  18  15    1.61    2.13
  -4 -18  14    9.15    2.46
  -4  18  14    9.41    3.30
  -4 -18  13   -0.74    1.84
  -4  18  13    1.03    2.09
  -4 -18  12   13.67    2.50
  -4  18  12   14.77    3.19
  -4 -18  11    5.27    1.71
  -4  18  11    4.57    2.86
  -4 -18  10   48.60    3.51
  -4  18  10   48.15    4.74
  -4 -18   9   59.93    3.71
  -4  18   9   56.99    4.99
  -4 -18   8   99.35    4.40
  -4  18   8   94.00    6.16
  -4 -18   7    1.81    1.25
  -4  18   7    0.44    1.94
  -4 -18   6    0.19    1.00
  -4  18   6    1.39    1.57
  -4 -18   5    0.88    0.98
  -4  18   5    2.01    2.00
  -4 -18   4   10.02    1.27
  -4  18   4   14.77    2.56
  -4 -18   3   -0.74    0.81
  -4  18   3   -0.33    1.30
  -4  18   2  105.63    5.84
   4  18  -2  101.83    2.97
  -4  18   1   -1.50    1.17
   4  18  -1    1.33    0.85
  -4  18   0   68.50    4.75
   4  18   0   68.15    2.83
  -4  18  -1    3.32    1.70
   4  18   1    2.28    1.08
  -4  18  -2  129.69    6.52
   4  18   2  144.28    4.78
  -4  18  -3    1.19    1.95
   4  18   3   -0.46    1.21
  -4  18  -4   60.44    4.68
   4  18   4   59.80    3.64
   4 -18   5    1.58    1.74
   4  18   5    4.62    1.63
   4 -18   6  222.30    9.25
   4  18   6  248.37    8.04
   4 -18   7    1.15    1.69
   4  18   7    2.62    1.73
   4 -18   8   24.43    3.53
   4  18   8   25.45    3.12
   4 -18   9    6.49    2.36
   4  18   9    2.71    1.88
   4 -18  10   -0.67    1.70
   4  18  10   -0.37    1.32
   4 -18  11   -0.65    2.48
   4  18  11    1.18    1.47
   4 -18  12   29.70    4.24
   4  18  12   35.53    4.16
   4 -18  13    0.49    1.91
   4  18  13    0.74    2.04
   4 -18  14   13.28    3.36
   4  18  14   18.02    3.17
   4 -18  15    6.91    2.92
   4  18  15    8.59    2.58
   4 -18  16   10.77    3.42
   4  18  16   12.19    3.36
   4 -18  17   -1.35    2.26
   4  18  17    2.25    2.50
   4 -18  18   14.47    4.55
   4  18  18   13.77    3.39
   4 -18  19   -0.46    2.52
   4  18  19    0.31    2.68
   4 -18  20    3.66    3.79
   4  18  20    2.00    2.30
  -4  19  23    0.05    2.67
  -4  19  22    1.83    2.70
  -4  19  21   -0.16    2.40
  -4  19  20   10.41    3.99
  -4  19  19    4.32    2.86
  -4  19  18   21.88    4.72
  -4  19  17    0.82    2.97
  -4  19  16    4.39    3.05
  -4  19  15    7.06    3.37
  -4 -19  14    3.07    1.97
  -4  19  14    5.88    2.56
  -4 -19  13    0.65    1.76
  -4  19  13    1.57    2.24
  -4 -19  12   52.60    4.11
  -4  19  12   48.61    5.13
  -4 -19  11   -0.78    1.29
  -4  19  11   -2.11    1.59
  -4 -19  10    0.75    1.72
  -4  19  10    0.25    1.78
  -4 -19   9   25.06    2.71
  -4  19   9   22.63    3.47
  -4 -19   8   59.66    3.52
  -4  19   8   54.10    4.84
  -4 -19   7   29.30    2.50
  -4  19   7   25.32    3.36
  -4 -19   6   68.42    3.10
  -4  19   6   63.45    4.94
  -4 -19   5  121.10    3.91
  -4  19   5  109.56    6.32
  -4 -19   4   91.53    3.19
  -4  19   4   98.90    5.93
  -4 -19   3   90.55    3.06
  -4  19   3   83.69    5.39
  -4  19   2   25.72    3.16
   4  19  -2   29.02    1.78
  -4  19   1   19.70    3.04
   4  19  -1   18.73    1.62
  -4  19   0   40.41    3.78
   4  19   0   43.57    2.42
  -4  19  -1    4.26    1.69
   4  19   1    4.75    1.31
  -4  19  -2    2.87    1.63
   4  19   2    1.29    1.17
  -4  19  -3   39.02    3.93
   4  19   3   44.85    3.13
  -4  19  -4   56.14    4.85
   4  19   4   67.50    4.00
   4 -19   5   40.29    4.08
   4  19   5   55.81    3.96
   4 -19   6    8.00    2.67
   4  19   6    9.89    2.15
   4 -19   7   30.37    3.77
   4  19   7   37.84    3.66
   4 -19   8   34.73    4.32
   4  19   8   38.57    3.69
   4 -19   9    6.74    2.80
   4  19   9    8.71    2.08
   4 -19  10   30.04    4.04
   4  19  10   36.02    3.92
   4 -19  11   16.11    3.37
   4  19  11   18.68    3.17
   4 -19  12    4.87    2.45
   4  19  12    2.36    1.72
   4 -19  13   -1.38    2.54
   4  19  13    1.09    2.26
   4 -19  14    4.61    3.30
   4  19  14    6.41    2.75
   4 -19  15   -0.35    2.93
   4  19  15   -0.58    2.22
   4 -19  16    0.98    3.15
   4  19  16   -0.62    2.22
   4 -19  17    2.49    2.86
   4  19  17    1.96    2.61
   4 -19  18   14.31    3.96
   4  19  18    9.53    3.00
   4 -19  19    2.69    3.72
   4  19  19    1.72    2.97
   4 -19  20    5.03    3.38
   4  19  20    8.70    3.13
  -4  20  23    5.92    3.30
  -4  20  22   -1.62    2.99
  -4  20  21    2.94    3.47
  -4  20  20   -0.08    2.34
  -4  20  19    8.53    3.91
  -4  20  18    1.50    2.57
  -4  20  17    6.62    2.96
  -4  20  16    9.56    3.08
  -4  20  15    2.62    2.31
  -4  20  14   36.37    5.08
  -4  20  13   26.16    4.25
  -4  20  12    1.20    2.77
  -4  20  11   15.18    3.71
  -4  20  10   29.33    4.29
  -4  20   9  120.32    7.52
  -4  20   8   36.01    4.15
  -4  20   7   13.29    3.08
  -4  20   6   13.01    2.97
  -4  20   5    1.10    1.55
  -4  20   4    6.82    2.07
  -4  20   3   25.93    3.25
  -4  20   2   -0.32    1.78
  -4  20   1   61.51    4.64
  -4  20   0    1.11    1.85
   4  20   0    1.05    0.90
  -4  20  -1   23.21    3.01
   4  20   1   23.02    2.04
  -4  20  -2   31.47    3.51
   4  20   2   32.51    2.61
  -4  20  -3   20.86    3.05
   4  20   3   19.55    2.18
  -4  20  -4    2.26    1.69
   4  20   4    1.41    1.55
  -4  20  -5   85.15    5.94
   4  20   5   92.67    4.85
   4 -20   6    9.99    2.48
   4  20   6    8.68    2.17
   4 -20   7   81.63    6.11
   4  20   7   92.58    5.38
   4 -20   8   11.65    2.74
   4  20   8   13.92    2.68
   4 -20   9    2.43    1.97
   4  20   9    2.76    1.98
   4 -20  10   -0.43    2.23
   4  20  10    0.06    1.73
   4 -20  11    5.36    2.36
   4  20  11    8.45    2.25
   4 -20  12    2.64    2.73
   4  20  12    4.56    2.39
   4 -20  13   13.24    3.27
   4  20  13   13.61    3.23
   4  20  14    3.64    2.51
   4 -20  15    3.60    2.65
   4  20  15    2.40    2.52
   4 -20  16   -1.51    2.00
   4  20  16   -0.41    2.39
   4 -20  17   10.51    4.19
   4  20  17   11.40    3.49
   4 -20  18    2.43    2.94
   4  20  18    5.10    3.17
   4 -20  19    1.14    2.90
   4  20  19    2.71    2.42
   4 -20  20    1.53    3.83
   4  20  20    3.45    3.17
  -4  21  23    7.98    4.21
  -4  21  22    0.45    3.30
  -4  21  21    7.45    3.20
  -4  21  20   -0.17    2.38
  -4  21  19   15.99    3.93
  -4  21  18   -0.61    2.90
  -4  21  17   20.10    4.07
  -4  21  16   -1.66    2.71
  -4  21  15   -0.03    2.76
  -4  21  14   21.12    4.06
  -4  21  13   35.43    4.75
  -4  21  12    0.08    2.15
  -4  21  11    3.47    2.27
  -4  21  10    3.04    2.25
  -4  21   9    6.26    2.38
  -4  21   8    2.37    1.97
  -4  21   7   73.48    5.60
  -4  21   6    3.50    1.86
  -4  21   5   26.32    3.73
  -4  21   4   34.42    3.80
  -4  21   3   22.79    3.13
  -4  21   2    3.60    1.75
  -4  21   1    1.56    1.95
  -4  21   0   -0.09    1.35
  -4  21  -1   97.12    5.96
  -4  21  -2    0.86    1.49
  -4  21  -3   24.38    3.29
   4  21   3   26.31    2.63
  -4  21  -4   12.03    2.58
   4  21   4   16.36    2.29
  -4  21  -5    6.60    2.25
   4  21   5    7.43    2.08
   4 -21   6   27.90    3.93
   4  21   6   33.21    3.36
   4 -21   7   22.81    3.38
   4  21   7   24.44    3.15
   4 -21   8   -0.63    1.60
   4  21   8    2.21    1.83
   4 -21   9   47.02    4.85
   4  21   9   54.69    4.73
   4 -21  10    4.12    2.21
   4  21  10    5.64    1.98
   4 -21  11   -3.14    2.13
   4  21  11    1.03    2.10
   4 -21  12   -0.18    1.92
   4  21  12   -2.68    1.81
   4 -21  13    7.33    3.36
   4  21  13    8.60    2.55
   4 -21  14    0.61    2.79
   4  21  14    1.55    2.35
   4 -21  15   -0.44    2.81
   4  21  15    0.54    2.32
   4 -21  16    0.03    2.20
   4  21  16   -1.79    1.56
   4 -21  17    0.94    2.56
   4  21  17    5.59    3.07
   4 -21  18    3.21    3.68
   4  21  18    5.44    3.16
   4 -21  19    9.96    3.71
   4  21  19   12.66    3.85
  -4  22  22    4.17    3.00
  -4  22  21    2.82    2.87
  -4  22  20    3.27    3.43
  -4  22  19    5.17    2.87
  -4  22  18    7.24    3.20
  -4  22  17    5.66    2.92
  -4  22  16    1.07    2.40
  -4  22  15   14.98    3.75
  -4  22  14    1.29    2.98
  -4  22  13   40.00    5.37
  -4  22  12   15.81    3.95
  -4  22  11   12.03    3.20
  -4  22  10   42.53    5.17
  -4  22   9   37.24    4.73
  -4  22   8   79.05    6.24
  -4  22   7   20.08    3.23
  -4  22   6    1.91    1.79
  -4  22   5   15.44    3.17
  -4  22   4    0.31    1.46
  -4  22   3    4.65    1.94
  -4  22   2   54.79    4.55
  -4  22   1    0.00    1.30
  -4  22   0   13.04    2.87
  -4  22  -1   82.20    5.69
  -4  22  -2    7.00    2.17
  -4  22  -3   28.19    3.52
  -4  22  -4   26.79    3.54
  -4  22  -5    3.59    2.38
   4 -22   6   63.07    5.41
   4  22   6   66.96    4.56
   4 -22   7   11.90    2.66
   4  22   7   17.07    2.85
   4 -22   8    1.61    1.92
   4  22   8    0.43    1.81
   4 -22   9    4.68    2.21
   4  22   9    3.21    2.16
   4 -22  10   -1.34    2.27
   4  22  10   -0.89    1.85
   4 -22  11    2.64    2.17
   4  22  11    4.67    2.42
   4 -22  12    4.93    3.06
   4  22  12    4.52    2.16
   4 -22  13    1.85    2.19
   4  22  13    1.39    2.58
   4 -22  14    9.40    2.97
   4  22  14    7.61    3.01
   4 -22  15   -0.60    2.13
   4  22  15   -0.10    2.48
   4 -22  16   -0.36    2.09
   4  22  16   -0.29    1.86
   4 -22  17   13.33    4.31
   4  22  17    8.50    2.94
   4 -22  18    5.47    3.18
   4  22  18    3.61    3.06
   4 -22  19    4.21    3.15
   4  22  19    6.22    3.47
  -4  23  22    6.17    3.34
  -4  23  21    1.09    3.24
  -4  23  20    6.01    3.37
  -4  23  19    3.93    3.48
  -4  23  18   18.18    4.15
  -4  23  17    1.38    2.49
  -4  23  16   12.42    3.51
  -4  23  15    6.85    3.55
  -4  23  14    3.04    2.48
  -4  23  13   31.10    4.68
  -4  23  12    7.72    2.86
  -4  23  11   -0.54    2.78
  -4  23  10    4.57    2.46
  -4  23   9   -0.11    1.88
  -4  23   8   25.64    3.78
  -4  23   7   30.32    4.18
  -4  23   6   24.58    3.85
  -4  23   5   -0.88    1.98
  -4  23   4   12.04    2.52
  -4  23   3    1.87    1.60
  -4  23   2    9.09    2.53
  -4  23   1    2.00    1.65
  -4  23   0   15.03    2.72
  -4  23  -1   21.32    3.07
  -4  23  -2    4.38    1.90
  -4  23  -3    2.11    1.84
  -4  23  -4    1.04    1.65
  -4  23  -5   -1.46    1.89
   4 -23   6    1.36    1.73
   4 -23   7    9.39    2.96
   4 -23   8   28.81    4.10
   4 -23   9    3.84    2.72
   4  23   9    1.48    1.95
   4 -23  10    1.61    2.02
   4  23  10    1.49    1.63
   4 -23  11    1.95    2.65
   4  23  11   -1.32    1.93
   4 -23  12    8.16    2.81
   4  23  12    6.12    2.73
   4 -23  13    6.97    3.26
   4  23  13   10.05    3.23
   4 -23  14    4.35    3.08
   4  23  14    3.31    2.78
   4 -23  15    3.38    3.09
   4  23  15    4.83    3.06
   4 -23  16    3.92    3.25
   4  23  16    0.16    2.10
   4 -23  17    3.00    2.77
   4  23  17    0.44    2.18
   4 -23  18   16.02    4.86
   4  23  18   12.20    3.53
   4 -23  19   -3.89    3.48
   4  23  19    2.44    3.20
  -4  24  22    4.04    3.99
  -4  24  21   -2.15    2.40
  -4  24  20    8.22    3.48
  -4  24  19    1.54    2.64
  -4  24  18    6.36    3.70
  -4  24  17    0.13    3.12
  -4  24  16    1.38    2.46
  -4  24  15   -1.84    1.94
  -4  24  14   28.04    5.03
[truncated: 1,310,397 more chars]
