# Supplementary material
Source: MDPI journal article supplement (https://www.mdpi.com/2073-4352/8/5/229)
Supplement: s1 [file s1 › 2.cif]

 
data_170624g
 
_audit_creation_method            'SHELXL-2014/7'
_shelx_SHELXL_version_number      '2014/7'
_chemical_name_systematic         ?
_chemical_name_common             ?
_chemical_melting_point           ?
_chemical_formula_moiety          ?
_chemical_formula_sum
 'C98.50 H79.50 Fe4 Gd N12.50 O20' 
_chemical_formula_weight          2138.89

loop_
 _atom_type_symbol
 _atom_type_description
 _atom_type_scat_dispersion_real
 _atom_type_scat_dispersion_imag
 _atom_type_scat_source
 'C'  'C'   0.0033   0.0016
 'International Tables Vol C Tables 4.2.6.8 and 6.1.1.4'
 'H'  'H'   0.0000   0.0000
 'International Tables Vol C Tables 4.2.6.8 and 6.1.1.4'
 'N'  'N'   0.0061   0.0033
 'International Tables Vol C Tables 4.2.6.8 and 6.1.1.4'
 'O'  'O'   0.0106   0.0060
 'International Tables Vol C Tables 4.2.6.8 and 6.1.1.4'
 'Fe'  'Fe'   0.3463   0.8444
 'International Tables Vol C Tables 4.2.6.8 and 6.1.1.4'
 'Gd'  'Gd'  -0.1653   3.9035
 'International Tables Vol C Tables 4.2.6.8 and 6.1.1.4'
 
_space_group_crystal_system       monoclinic
_space_group_IT_number            14
_space_group_name_H-M_alt         'P 21/n'
_space_group_name_Hall            '-P 2yn'
 
_shelx_space_group_comment
;
The symmetry employed for this shelxl refinement is uniquely defined
by the following loop, which should always be used as a source of
symmetry information in preference to the above space-group names.
They are only intended as comments.
;
 
loop_
 _space_group_symop_operation_xyz
 'x, y, z'
 '-x+1/2, y+1/2, -z+1/2'
 '-x, -y, -z'
 'x-1/2, -y-1/2, z-1/2'
 
_cell_length_a                    14.2222(13)
_cell_length_b                    33.248(3)
_cell_length_c                    19.3213(17)
_cell_angle_alpha                 90
_cell_angle_beta                  105.913(3)
_cell_angle_gamma                 90
_cell_volume                      8786.0(13)
_cell_formula_units_Z             4
_cell_measurement_temperature     298(2)
_cell_measurement_reflns_used     6032 
_cell_measurement_theta_min       2.3655 
_cell_measurement_theta_max       22.156 
 
_exptl_crystal_description        acicular 
_exptl_crystal_colour             dark 
_exptl_crystal_density_meas       ?
_exptl_crystal_density_method     ?
_exptl_crystal_density_diffrn     1.617          
_exptl_crystal_F_000              4344
_exptl_transmission_factor_min    ?
_exptl_transmission_factor_max    ?
_exptl_crystal_size_max           0.470
_exptl_crystal_size_mid           0.250
_exptl_crystal_size_min           0.200
_exptl_absorpt_coefficient_mu     1.472
_shelx_estimated_absorpt_T_min    0.545
_shelx_estimated_absorpt_T_max    0.757
_exptl_absorpt_correction_type    multi-scan 
_exptl_absorpt_correction_T_min   0.5418 
_exptl_absorpt_correction_T_max   0.6947 
_exptl_absorpt_process_details    sadabs 
_exptl_absorpt_special_details    ?
_diffrn_ambient_temperature       298(2)
_diffrn_radiation_wavelength      0.71073
_diffrn_radiation_type            MoK\a
_diffrn_source                    ?
_diffrn_radiation_monochromator   graphite 
_diffrn_measurement_device_type   'CCD area detector' 
_diffrn_measurement_method        'phi and omega scans' 
_diffrn_detector_area_resol_mean  ?
_diffrn_reflns_number             44274
_diffrn_reflns_av_unetI/netI      0.0825
_diffrn_reflns_av_R_equivalents   0.0664
_diffrn_reflns_limit_h_min        -16
_diffrn_reflns_limit_h_max        16
_diffrn_reflns_limit_k_min        -32
_diffrn_reflns_limit_k_max        39
_diffrn_reflns_limit_l_min        -18
_diffrn_reflns_limit_l_max        22
_diffrn_reflns_theta_min          2.365
_diffrn_reflns_theta_max          25.020
_diffrn_reflns_theta_full         25.020
_diffrn_measured_fraction_theta_max   0.998
_diffrn_measured_fraction_theta_full  0.998
_diffrn_reflns_Laue_measured_fraction_max    0.998
_diffrn_reflns_Laue_measured_fraction_full   0.998
_diffrn_reflns_point_group_measured_fraction_max   0.998
_diffrn_reflns_point_group_measured_fraction_full  0.998
_reflns_number_total              15469
_reflns_number_gt                 10476
_reflns_threshold_expression      'I > 2\s(I)'
_reflns_Friedel_coverage          0.000
_reflns_Friedel_fraction_max      .
_reflns_Friedel_fraction_full     .
 
_reflns_special_details
;
 Reflections were merged by SHELXL according to the crystal
 class for the calculation of statistics and refinement.
 
 _reflns_Friedel_fraction is defined as the number of unique
 Friedel pairs measured divided by the number that would be
 possible theoretically, ignoring centric projections and
 systematic absences.
;
 
_computing_data_collection        'Bruker SMART' 
_computing_cell_refinement        'Bruker SMART' 
_computing_data_reduction         'Bruker SAINT' 
_computing_structure_solution     'Bruker SHELXTL' 
_computing_structure_refinement 'SHELXL-2014/7 (Sheldrick, 2014)' 
_computing_molecular_graphics     'Bruker SHELXTL' 
_computing_publication_material   'Bruker SHELXTL' 
_refine_special_details           ? 
_refine_ls_structure_factor_coef  Fsqd
_refine_ls_matrix_type            full
_refine_ls_weighting_scheme       calc
_refine_ls_weighting_details
'w=1/[\s^2^(Fo^2^)+(0.0275P)^2^+75.3338P] where P=(Fo^2^+2Fc^2^)/3'
_atom_sites_solution_primary      ?
_atom_sites_solution_secondary    ?
_atom_sites_solution_hydrogens    geom
_refine_ls_hydrogen_treatment     constr
_refine_ls_extinction_method      none
_refine_ls_extinction_coef        .
_refine_ls_number_reflns          15469
_refine_ls_number_parameters      1225
_refine_ls_number_restraints      4177
_refine_ls_R_factor_all           0.1119
_refine_ls_R_factor_gt            0.0668
_refine_ls_wR_factor_ref          0.1523
_refine_ls_wR_factor_gt           0.1333
_refine_ls_goodness_of_fit_ref    1.050
_refine_ls_restrained_S_all       6.644
_refine_ls_shift/su_max           0.005
_refine_ls_shift/su_mean          0.000
 
loop_
 _atom_site_label
 _atom_site_type_symbol
 _atom_site_fract_x
 _atom_site_fract_y
 _atom_site_fract_z
 _atom_site_U_iso_or_equiv
 _atom_site_adp_type
 _atom_site_occupancy
 _atom_site_site_symmetry_order  
 _atom_site_calc_flag
 _atom_site_refinement_flags_posn
 _atom_site_refinement_flags_adp
 _atom_site_refinement_flags_occupancy
 _atom_site_disorder_assembly
 _atom_site_disorder_group
N9 N 0.9256(6) 0.7420(3) 0.6287(5) 0.062(2) Uani 1 1 d D U . . .
N11 N 0.0668(6) 0.7731(3) 0.5695(5) 0.065(2) Uani 1 1 d D U . . .
H22 H 0.0277 0.7625 0.5914 0.078 Uiso 1 1 calc R U . . .
N12 N 0.8891(15) 0.4766(8) 0.6449(11) 0.315(7) Uani 1 1 d D U . . .
N22 N 0.5552(14) 0.3730(5) 0.7546(11) 0.167(4) Uani 1 1 d . U . . .
Gd1 Gd 0.46993(3) 0.66566(2) 0.75046(2) 0.02694(11) Uani 1 1 d . U . . .
Fe1 Fe 0.43329(8) 0.58775(3) 0.88164(6) 0.0317(3) Uani 1 1 d . U . . .
Fe2 Fe 0.68769(8) 0.59846(3) 0.77403(6) 0.0318(3) Uani 1 1 d . U . . .
Fe3 Fe 0.20040(8) 0.63910(3) 0.67326(6) 0.0315(3) Uani 1 1 d . U . . .
Fe4 Fe 0.45387(8) 0.64357(3) 0.55570(6) 0.0339(3) Uani 1 1 d . U . . .
N1 N 0.5746(5) 0.62486(19) 0.6346(3) 0.0326(13) Uani 1 1 d . U . . .
N2 N 0.6132(4) 0.59948(19) 0.8488(3) 0.0329(13) Uani 1 1 d . U . . .
N3 N 0.3262(5) 0.59502(19) 0.7866(3) 0.0332(14) Uani 1 1 d . U . . .
N4 N 0.2813(4) 0.6474(2) 0.6024(3) 0.0336(13) Uani 1 1 d . U . . .
N5 N 0.1036(5) 0.6307(2) 0.7422(4) 0.0378(15) Uani 1 1 d . U . . .
N6 N 0.3627(5) 0.5657(2) 0.9591(4) 0.0432(16) Uani 1 1 d . U . . .
N7 N 0.6227(6) 0.5397(2) 0.7424(4) 0.0507(17) Uani 1 1 d . U . . .
N8 N 0.4075(6) 0.5800(2) 0.5345(4) 0.0526(17) Uani 1 1 d . U . . .
N13 N 0.0387(11) 0.5349(5) 0.5393(9) 0.136(4) Uani 0.5 1 d . U P A 1
O1 O 0.5261(4) 0.63876(18) 0.4882(3) 0.0442(13) Uani 1 1 d . U . . .
O2 O 0.7243(4) 0.59751(17) 0.6831(3) 0.0412(13) Uani 1 1 d . U . . .
O3 O 0.5697(4) 0.62287(16) 0.7052(3) 0.0342(12) Uani 1 1 d . U . . .
O4 O 0.7923(4) 0.57264(17) 0.8430(3) 0.0410(13) Uani 1 1 d . U . . .
O5 O 0.5140(4) 0.60969(16) 0.8239(3) 0.0334(11) Uani 1 1 d . U . . .
O6 O 0.5693(4) 0.58172(16) 0.9474(3) 0.0375(13) Uani 1 1 d . U . . .
O7 O 0.4293(4) 0.53300(16) 0.8536(3) 0.0421(13) Uani 1 1 d . U . . .
O8 O 0.3198(4) 0.63291(15) 0.7572(3) 0.0312(11) Uani 1 1 d . U . . .
O9 O 0.2141(4) 0.58056(16) 0.6807(3) 0.0413(13) Uani 1 1 d . U . . .
O10 O 0.4774(4) 0.70209(17) 0.5608(3) 0.0438(13) Uani 1 1 d . U . . .
O11 O 0.5245(4) 0.71013(17) 0.6793(3) 0.0427(13) Uani 1 1 d . U . . .
O12 O 0.1932(4) 0.69557(16) 0.6991(3) 0.0392(13) Uani 1 1 d . U . . .
O13 O 0.3474(4) 0.71394(16) 0.7182(3) 0.0418(13) Uani 1 1 d . U . . .
O14 O 0.4474(4) 0.68701(16) 0.8600(3) 0.0374(12) Uani 1 1 d . U . . .
O15 O 0.3929(4) 0.63966(17) 0.9167(3) 0.0397(13) Uani 1 1 d . U . . .
O16 O 0.6291(4) 0.68665(16) 0.8173(3) 0.0368(12) Uani 1 1 d . U . . .
O17 O 0.7522(4) 0.65065(16) 0.8026(3) 0.0395(12) Uani 1 1 d . U . . .
O18 O 0.0875(4) 0.63967(19) 0.5921(3) 0.0479(14) Uani 1 1 d . U . . .
O19 O 0.3168(4) 0.65235(17) 0.4962(3) 0.0437(13) Uani 1 1 d . U . . .
O20 O 0.3839(4) 0.64510(16) 0.6309(3) 0.0333(11) Uani 1 1 d . U . . .
C1 C 0.6107(6) 0.6222(3) 0.4922(5) 0.0398(17) Uani 1 1 d . U . . .
C2 C 0.6374(7) 0.6174(3) 0.4287(5) 0.052(2) Uani 1 1 d . U . . .
H2 H 0.5961 0.6268 0.3857 0.062 Uiso 1 1 calc R U . . .
C3 C 0.7223(7) 0.5994(3) 0.4285(6) 0.059(2) Uani 1 1 d . U . . .
H3 H 0.7381 0.5962 0.3852 0.070 Uiso 1 1 calc R U . . .
C4 C 0.7851(7) 0.5858(3) 0.4903(5) 0.051(2) Uani 1 1 d . U . . .
H4 H 0.8440 0.5740 0.4895 0.062 Uiso 1 1 calc R U . . .
C5 C 0.7611(6) 0.5897(3) 0.5530(5) 0.0424(18) Uani 1 1 d . U . . .
H5 H 0.8036 0.5799 0.5952 0.051 Uiso 1 1 calc R U . . .
C6 C 0.6746(6) 0.6079(2) 0.5558(4) 0.0386(17) Uani 1 1 d . U . . .
C7 C 0.6572(6) 0.6102(2) 0.6273(4) 0.0319(15) Uani 1 1 d . U . . .
C8 C 0.8072(6) 0.5661(2) 0.9129(5) 0.0386(18) Uani 1 1 d . U . . .
C9 C 0.8980(6) 0.5515(3) 0.9525(5) 0.046(2) Uani 1 1 d . U . . .
H9 H 0.9458 0.5475 0.9287 0.055 Uiso 1 1 calc R U . . .
C10 C 0.9202(7) 0.5430(3) 1.0229(5) 0.057(2) Uani 1 1 d . U . . .
H10 H 0.9818 0.5332 1.0467 0.068 Uiso 1 1 calc R U . . .
C11 C 0.8515(7) 0.5489(3) 1.0595(5) 0.056(2) Uani 1 1 d . U . . .
H11 H 0.8659 0.5435 1.1085 0.067 Uiso 1 1 calc R U . . .
C12 C 0.7604(6) 0.5630(3) 1.0222(5) 0.046(2) Uani 1 1 d . U . . .
H12 H 0.7136 0.5669 1.0471 0.055 Uiso 1 1 calc R U . . .
C13 C 0.7357(6) 0.5717(2) 0.9490(4) 0.0359(17) Uani 1 1 d . U . . .
C14 C 0.6353(6) 0.5852(2) 0.9133(4) 0.0338(16) Uani 1 1 d . U . . .
C15 C 0.3542(7) 0.5125(2) 0.8171(5) 0.0426(18) Uani 1 1 d . U . . .
C16 C 0.3518(7) 0.4718(3) 0.8289(5) 0.051(2) Uani 1 1 d . U . . .
H16 H 0.4018 0.4597 0.8643 0.061 Uiso 1 1 calc R U . . .
C17 C 0.2782(8) 0.4494(3) 0.7900(6) 0.062(2) Uani 1 1 d . U . . .
H17 H 0.2790 0.4219 0.7995 0.074 Uiso 1 1 calc R U . . .
C18 C 0.2009(8) 0.4644(3) 0.7364(6) 0.066(3) Uani 1 1 d . U . . .
H18 H 0.1506 0.4480 0.7106 0.079 Uiso 1 1 calc R U . . .
C19 C 0.2018(7) 0.5039(3) 0.7237(5) 0.058(2) Uani 1 1 d . U . . .
H19 H 0.1514 0.5151 0.6876 0.069 Uiso 1 1 calc R U . . .
C20 C 0.2759(6) 0.5285(3) 0.7626(5) 0.0413(18) Uani 1 1 d . U . . .
C21 C 0.2706(6) 0.5701(2) 0.7411(4) 0.0316(15) Uani 1 1 d . U . . .
C22 C 0.0726(6) 0.6461(3) 0.5232(5) 0.0472(19) Uani 1 1 d . U . . .
C23 C -0.0231(7) 0.6473(3) 0.4794(5) 0.061(2) Uani 1 1 d . U . . .
H23 H -0.0741 0.6428 0.5000 0.073 Uiso 1 1 calc R U . . .
C24 C -0.0446(8) 0.6547(4) 0.4075(6) 0.078(3) Uani 1 1 d . U . . .
H24 H -0.1092 0.6549 0.3795 0.094 Uiso 1 1 calc R U . . .
C25 C 0.0297(8) 0.6617(4) 0.3772(6) 0.083(3) Uani 1 1 d . U . . .
H25 H 0.0163 0.6677 0.3285 0.100 Uiso 1 1 calc R U . . .
C26 C 0.1251(7) 0.6597(4) 0.4195(5) 0.066(2) Uani 1 1 d . U . . .
H26 H 0.1752 0.6639 0.3978 0.080 Uiso 1 1 calc R U . . .
C27 C 0.1499(6) 0.6518(3) 0.4930(4) 0.0466(19) Uani 1 1 d . U . . .
C28 C 0.2544(6) 0.6502(3) 0.5320(4) 0.0391(17) Uani 1 1 d . U . . .
C29 C 0.4989(6) 0.7234(3) 0.6174(5) 0.0400(17) Uani 1 1 d . U . . .
C30 C 0.4951(6) 0.7665(3) 0.6064(4) 0.046(2) Uani 1 1 d D U . . .
C31 C 0.4635(8) 0.7821(3) 0.5380(5) 0.062(2) Uani 1 1 d D U . . .
H31 H 0.4484 0.7649 0.4985 0.074 Uiso 1 1 calc R U . . .
C32 C 0.4544(9) 0.8229(3) 0.5277(6) 0.078(3) Uani 1 1 d D U . . .
H32 H 0.4322 0.8338 0.4819 0.094 Uiso 1 1 calc R U . . .
C33 C 0.4791(9) 0.8468(3) 0.5876(6) 0.084(3) Uani 1 1 d D U . . .
H33 H 0.4730 0.8746 0.5818 0.101 Uiso 1 1 calc R U . . .
C34 C 0.5127(9) 0.8314(3) 0.6560(6) 0.081(3) Uani 1 1 d D U . . .
H34 H 0.5293 0.8487 0.6953 0.097 Uiso 1 1 calc R U . . .
C35 C 0.5217(8) 0.7908(3) 0.6660(5) 0.062(2) Uani 1 1 d D U . . .
H35 H 0.5452 0.7799 0.7118 0.074 Uiso 1 1 calc R U . . .
C36 C 0.2610(6) 0.7216(2) 0.7160(4) 0.0353(16) Uani 1 1 d . U . . .
C37 C 0.2330(6) 0.7611(2) 0.7292(4) 0.0410(18) Uani 1 1 d D U . . .
C38 C 0.2906(6) 0.7926(2) 0.7223(5) 0.048(2) Uani 1 1 d D U . . .
H38 H 0.3481 0.7882 0.7094 0.058 Uiso 1 1 calc R U . . .
C39 C 0.2637(7) 0.8307(3) 0.7343(5) 0.059(2) Uani 1 1 d D U . . .
H39 H 0.3022 0.8525 0.7292 0.070 Uiso 1 1 calc R U . . .
C40 C 0.1789(7) 0.8366(3) 0.7542(5) 0.063(2) Uani 1 1 d D U . . .
H40 H 0.1601 0.8627 0.7617 0.075 Uiso 1 1 calc R U . . .
C41 C 0.1222(7) 0.8052(2) 0.7631(5) 0.058(2) Uani 1 1 d D U . . .
H41 H 0.0661 0.8094 0.7780 0.069 Uiso 1 1 calc R U . . .
C42 C 0.1492(6) 0.7672(2) 0.7498(5) 0.049(2) Uani 1 1 d D U . . .
H42 H 0.1106 0.7454 0.7546 0.058 Uiso 1 1 calc R U . . .
C43 C 0.3986(6) 0.6748(3) 0.8989(4) 0.0371(17) Uani 1 1 d . U . . .
C44 C 0.3400(6) 0.7034(2) 0.9276(4) 0.0361(18) Uani 1 1 d D U . . .
C45 C 0.3446(7) 0.7433(2) 0.9128(5) 0.050(2) Uani 1 1 d D U . . .
H45 H 0.3880 0.7524 0.8881 0.060 Uiso 1 1 calc R U . . .
C46 C 0.2845(7) 0.7699(3) 0.9349(5) 0.061(2) Uani 1 1 d D U . . .
H46 H 0.2894 0.7973 0.9266 0.074 Uiso 1 1 calc R U . . .
C47 C 0.2178(7) 0.7567(3) 0.9687(5) 0.069(3) Uani 1 1 d D U . . .
H47 H 0.1757 0.7748 0.9814 0.083 Uiso 1 1 calc R U . . .
C48 C 0.2128(7) 0.7169(3) 0.9839(5) 0.064(2) Uani 1 1 d D U . . .
H48 H 0.1682 0.7078 1.0076 0.076 Uiso 1 1 calc R U . . .
C49 C 0.2749(6) 0.6904(3) 0.9637(5) 0.049(2) Uani 1 1 d D U . . .
H49 H 0.2726 0.6632 0.9746 0.058 Uiso 1 1 calc R U . . .
C50 C 0.7177(6) 0.6828(2) 0.8180(4) 0.0339(16) Uani 1 1 d . U . . .
C51 C 0.7851(6) 0.7157(2) 0.8352(5) 0.0420(18) Uani 1 1 d D U . . .
C52 C 0.7555(6) 0.7519(2) 0.8544(5) 0.051(2) Uani 1 1 d D U . . .
H52 H 0.6910 0.7560 0.8549 0.062 Uiso 1 1 calc R U . . .
C53 C 0.8234(6) 0.7822(3) 0.8731(5) 0.059(2) Uani 1 1 d D U . . .
H53 H 0.8045 0.8070 0.8874 0.071 Uiso 1 1 calc R U . . .
C54 C 0.9184(7) 0.7770(3) 0.8711(6) 0.064(3) Uani 1 1 d D U . . .
H54 H 0.9625 0.7982 0.8833 0.076 Uiso 1 1 calc R U . . .
C55 C 0.9484(7) 0.7409(2) 0.8516(5) 0.054(2) Uani 1 1 d D U . . .
H55 H 1.0123 0.7369 0.8497 0.065 Uiso 1 1 calc R U . . .
C56 C 0.8808(5) 0.7109(2) 0.8348(5) 0.0465(19) Uani 1 1 d D U . . .
H56 H 0.9005 0.6858 0.8225 0.056 Uiso 1 1 calc R U . . .
C57 C 0.2685(7) 0.5721(3) 0.9520(5) 0.051(2) Uani 1 1 d . U . . .
H57 H 0.2340 0.5887 0.9150 0.061 Uiso 1 1 calc R U . . .
C58 C 0.2211(8) 0.5555(3) 0.9963(6) 0.068(3) Uani 1 1 d . U . . .
H58 H 0.1551 0.5607 0.9903 0.081 Uiso 1 1 calc R U . . .
C59 C 0.2709(8) 0.5311(3) 1.0495(6) 0.067(3) Uani 1 1 d . U . . .
H59 H 0.2390 0.5191 1.0803 0.080 Uiso 1 1 calc R U . . .
C60 C 0.3685(8) 0.5239(3) 1.0585(6) 0.063(3) Uani 1 1 d . U . . .
H60 H 0.4043 0.5076 1.0957 0.076 Uiso 1 1 calc R U . . .
C61 C 0.4107(7) 0.5411(3) 1.0115(5) 0.048(2) Uani 1 1 d . U . . .
H61 H 0.4762 0.5357 1.0158 0.058 Uiso 1 1 calc R U . . .
C62 C 0.0263(6) 0.6077(3) 0.7223(5) 0.050(2) Uani 1 1 d . U . . .
H62 H 0.0110 0.5964 0.6765 0.060 Uiso 1 1 calc R U . . .
C63 C -0.0323(7) 0.5993(3) 0.7649(6) 0.059(2) Uani 1 1 d . U . . .
H63 H -0.0860 0.5824 0.7490 0.070 Uiso 1 1 calc R U . . .
C64 C -0.0116(7) 0.6160(3) 0.8310(6) 0.054(2) Uani 1 1 d . U . . .
H64 H -0.0514 0.6113 0.8611 0.065 Uiso 1 1 calc R U . . .
C65 C 0.0682(7) 0.6396(3) 0.8526(5) 0.055(2) Uani 1 1 d . U . . .
H65 H 0.0852 0.6509 0.8984 0.066 Uiso 1 1 calc R U . . .
C66 C 0.1232(6) 0.6469(3) 0.8068(5) 0.0427(18) Uani 1 1 d . U . . .
H66 H 0.1768 0.6639 0.8216 0.051 Uiso 1 1 calc R U . . .
C67 C 0.5298(8) 0.5328(3) 0.7238(6) 0.067(2) Uani 1 1 d . U . . .
H67 H 0.4884 0.5545 0.7225 0.081 Uiso 1 1 calc R U . . .
C68 C 0.4881(9) 0.4965(4) 0.7062(6) 0.078(3) Uani 1 1 d . U . . .
H68 H 0.4205 0.4935 0.6924 0.093 Uiso 1 1 calc R U . . .
C69 C 0.5448(12) 0.4663(4) 0.7091(8) 0.111(4) Uani 1 1 d . U . . .
H69 H 0.5184 0.4409 0.6963 0.133 Uiso 1 1 calc R U . . .
C70 C 0.6416(12) 0.4711(4) 0.7302(9) 0.123(4) Uani 1 1 d . U . . .
H70 H 0.6831 0.4491 0.7346 0.147 Uiso 1 1 calc R U . . .
C71 C 0.6794(10) 0.5099(4) 0.7456(7) 0.096(3) Uani 1 1 d . U . . .
H71 H 0.7467 0.5138 0.7583 0.115 Uiso 1 1 calc R U . . .
C72 C 0.3553(8) 0.5615(3) 0.5681(6) 0.072(2) Uani 1 1 d . U . . .
H72 H 0.3426 0.5748 0.6069 0.087 Uiso 1 1 calc R U . . .
C73 C 0.3168(10) 0.5248(4) 0.5532(8) 0.095(3) Uani 1 1 d . U . . .
H73 H 0.2785 0.5136 0.5802 0.114 Uiso 1 1 calc R U . . .
C74 C 0.3337(11) 0.5058(4) 0.5015(8) 0.110(4) Uani 1 1 d . U . . .
H74 H 0.3065 0.4805 0.4890 0.133 Uiso 1 1 calc R U . . .
C75 C 0.3907(12) 0.5221(4) 0.4647(8) 0.117(4) Uani 1 1 d . U . . .
H75 H 0.4079 0.5079 0.4286 0.140 Uiso 1 1 calc R U . . .
C76 C 0.4228(9) 0.5602(4) 0.4816(7) 0.085(3) Uani 1 1 d . U . . .
H76 H 0.4577 0.5727 0.4533 0.103 Uiso 1 1 calc R U . . .
C77 C 0.9203(8) 0.7030(3) 0.6283(6) 0.068(3) Uani 1 1 d . U . . .
H77 H 0.9692 0.6874 0.6183 0.081 Uiso 1 1 calc R U . . .
C78 C 0.8415(8) 0.6856(3) 0.6430(6) 0.065(2) Uani 1 1 d . U . . .
H78 H 0.8359 0.6577 0.6423 0.078 Uiso 1 1 calc R U . . .
C79 C 0.7719(8) 0.7080(3) 0.6584(5) 0.062(2) Uani 1 1 d . U . . .
H79 H 0.7173 0.6959 0.6672 0.075 Uiso 1 1 calc R U . . .
C80 C 0.7818(8) 0.7472(4) 0.6608(6) 0.070(3) Uani 1 1 d . U . . .
H80 H 0.7347 0.7634 0.6720 0.083 Uiso 1 1 calc R U . . .
C81 C 0.8620(9) 0.7638(3) 0.6467(6) 0.071(3) Uani 1 1 d . U . . .
H81 H 0.8708 0.7915 0.6503 0.085 Uiso 1 1 calc R U . . .
C82 C 0.1222(9) 0.7491(4) 0.5489(6) 0.076(3) Uani 1 1 d . U . . .
H82 H 0.1195 0.7216 0.5561 0.091 Uiso 1 1 calc R U . . .
C83 C 0.1858(11) 0.7651(5) 0.5159(7) 0.099(3) Uani 1 1 d . U . . .
H83 H 0.2297 0.7486 0.5015 0.119 Uiso 1 1 calc R U . . .
C84 C 0.1854(11) 0.8039(5) 0.5043(7) 0.096(3) Uani 1 1 d . U . . .
H84 H 0.2277 0.8149 0.4802 0.115 Uiso 1 1 calc R U . . .
C85 C 0.1244(10) 0.8278(4) 0.5270(7) 0.093(3) Uani 1 1 d . U . . .
H85 H 0.1243 0.8555 0.5194 0.112 Uiso 1 1 calc R U . . .
C86 C 0.0620(9) 0.8110(4) 0.5616(6) 0.078(3) Uani 1 1 d . U . . .
H86 H 0.0185 0.8265 0.5784 0.094 Uiso 1 1 calc R U . . .
C87 C 0.5684(18) 0.3792(6) 0.8252(14) 0.169(5) Uani 1 1 d . U . . .
H87 H 0.5138 0.3873 0.8393 0.202 Uiso 1 1 calc R U . . .
C88 C 0.6463(19) 0.3752(6) 0.8742(14) 0.181(6) Uani 1 1 d . U . . .
H88 H 0.6477 0.3779 0.9223 0.217 Uiso 1 1 calc R U . . .
C89 C 0.7330(19) 0.3662(7) 0.8534(15) 0.188(6) Uani 1 1 d . U . . .
H89 H 0.7942 0.3644 0.8866 0.225 Uiso 1 1 calc R U . . .
C90 C 0.720(2) 0.3607(7) 0.7834(15) 0.200(5) Uani 1 1 d . U . . .
H90 H 0.7754 0.3542 0.7691 0.239 Uiso 1 1 calc R U . . .
C91 C 0.6381(18) 0.3633(6) 0.7319(13) 0.172(5) Uani 1 1 d . U . . .
H91 H 0.6351 0.3590 0.6838 0.206 Uiso 1 1 calc R U . . .
C92 C 0.8653(14) 0.4367(8) 0.6514(13) 0.306(8) Uani 1 1 d D U . . .
H92 H 0.8394 0.4211 0.6107 0.367 Uiso 1 1 calc R U . . .
C93 C 0.8803(15) 0.4204(5) 0.7188(17) 0.284(7) Uani 1 1 d D U . . .
H93 H 0.8643 0.3936 0.7234 0.341 Uiso 1 1 calc R U . . .
C94 C 0.9183(16) 0.4428(8) 0.7792(12) 0.297(8) Uani 1 1 d D U . . .
H94 H 0.9280 0.4314 0.8245 0.357 Uiso 1 1 calc R U . . .
C95 C 0.9422(15) 0.4823(8) 0.7727(12) 0.269(7) Uani 1 1 d D U . . .
H95 H 0.9690 0.4976 0.8137 0.323 Uiso 1 1 calc R U . . .
C96 C 0.9264(16) 0.4991(5) 0.7058(16) 0.295(8) Uani 1 1 d D U . . .
H96 H 0.9411 0.5261 0.7016 0.354 Uiso 1 1 calc R U . . .
C97 C 0.0460(14) 0.5327(7) 0.4699(10) 0.177(6) Uani 1 1 d D U . . .
H97 H 0.0681 0.5538 0.4469 0.212 Uiso 1 1 calc R U . A 1
C98 C 0.0387(11) 0.5349(5) 0.5393(9) 0.136(4) Uani 0.5 1 d D U P A 2
H98 H 0.0702 0.5556 0.5693 0.164 Uiso 0.5 1 calc R U P A 2
C99 C -0.0150(14) 0.5068(6) 0.5645(10) 0.170(5) Uani 1 1 d D U . . .
H99 H -0.0330 0.5130 0.6060 0.204 Uiso 1 1 calc R U . A 1
 
loop_
 _atom_site_aniso_label
 _atom_site_aniso_U_11
 _atom_site_aniso_U_22
 _atom_site_aniso_U_33
 _atom_site_aniso_U_23
 _atom_site_aniso_U_13
 _atom_site_aniso_U_12
N9 0.058(5) 0.051(5) 0.074(5) 0.009(4) 0.012(4) -0.008(4)
N11 0.064(5) 0.062(5) 0.067(4) 0.009(4) 0.014(4) -0.014(4)
N12 0.327(13) 0.209(13) 0.329(14) -0.014(13) -0.046(13) -0.010(13)
N22 0.160(9) 0.123(7) 0.195(9) -0.018(8) 0.008(9) -0.017(7)
Gd1 0.0226(2) 0.0263(2) 0.0339(2) 0.00274(18) 0.01109(15) 0.00114(18)
Fe1 0.0278(6) 0.0345(6) 0.0343(6) 0.0061(5) 0.0112(5) 0.0005(5)
Fe2 0.0274(6) 0.0296(6) 0.0406(7) 0.0059(5) 0.0131(5) 0.0035(5)
Fe3 0.0248(6) 0.0340(6) 0.0355(6) 0.0032(5) 0.0082(5) -0.0005(5)
Fe4 0.0339(7) 0.0352(7) 0.0353(6) 0.0038(5) 0.0141(5) 0.0017(5)
N1 0.037(3) 0.030(3) 0.036(3) 0.004(2) 0.019(2) -0.001(3)
N2 0.025(3) 0.037(3) 0.039(3) 0.007(3) 0.013(2) 0.003(3)
N3 0.032(3) 0.031(3) 0.037(3) 0.005(3) 0.010(2) 0.000(3)
N4 0.024(3) 0.040(3) 0.039(3) 0.003(3) 0.013(2) -0.002(3)
N5 0.030(3) 0.044(3) 0.044(3) 0.006(3) 0.018(3) -0.003(3)
N6 0.045(4) 0.040(4) 0.049(4) 0.012(3) 0.021(3) 0.003(3)
N7 0.045(4) 0.039(3) 0.068(4) -0.001(3) 0.016(3) 0.004(3)
N8 0.057(4) 0.045(4) 0.060(4) -0.009(3) 0.024(3) -0.008(3)
N13 0.123(6) 0.133(6) 0.131(6) 0.007(6) -0.004(6) 0.000(6)
O1 0.047(3) 0.050(3) 0.042(3) 0.006(3) 0.022(3) 0.007(3)
O2 0.038(3) 0.045(3) 0.045(3) 0.003(2) 0.019(2) 0.005(3)
O3 0.035(3) 0.038(3) 0.035(3) 0.003(2) 0.019(2) 0.004(2)
O4 0.032(3) 0.047(3) 0.047(3) 0.011(3) 0.016(2) 0.013(2)
O5 0.025(2) 0.037(3) 0.039(3) 0.012(2) 0.010(2) 0.006(2)
O6 0.034(3) 0.044(3) 0.036(3) 0.011(2) 0.012(2) -0.002(2)
O7 0.044(3) 0.033(3) 0.049(3) 0.003(2) 0.012(2) 0.001(2)
O8 0.029(3) 0.028(2) 0.037(3) 0.007(2) 0.011(2) -0.001(2)
O9 0.042(3) 0.036(3) 0.045(3) 0.002(2) 0.010(2) -0.005(2)
O10 0.054(3) 0.040(3) 0.043(3) 0.008(3) 0.022(3) 0.005(3)
O11 0.043(3) 0.042(3) 0.047(3) 0.005(3) 0.019(2) -0.007(3)
O12 0.033(3) 0.033(3) 0.051(3) 0.007(2) 0.010(2) 0.005(2)
O13 0.034(3) 0.033(3) 0.060(3) 0.004(2) 0.015(2) 0.003(2)
O14 0.038(3) 0.036(3) 0.043(3) -0.005(2) 0.020(2) -0.002(2)
O15 0.041(3) 0.037(3) 0.044(3) -0.001(2) 0.018(2) -0.004(2)
O16 0.034(3) 0.035(3) 0.043(3) -0.001(2) 0.014(2) 0.000(2)
O17 0.032(3) 0.035(3) 0.053(3) -0.006(2) 0.015(2) 0.002(2)
O18 0.036(3) 0.063(3) 0.045(3) 0.008(3) 0.010(2) -0.003(3)
O19 0.041(3) 0.051(3) 0.040(3) 0.006(3) 0.013(2) 0.000(3)
O20 0.027(2) 0.040(3) 0.034(2) 0.003(2) 0.011(2) 0.004(2)
C1 0.041(4) 0.039(4) 0.048(4) 0.000(3) 0.026(3) -0.005(3)
C2 0.057(5) 0.061(5) 0.046(4) 0.003(4) 0.028(4) 0.004(4)
C3 0.058(5) 0.070(5) 0.058(5) -0.002(5) 0.034(4) -0.002(5)
C4 0.047(5) 0.061(5) 0.059(5) -0.009(4) 0.037(4) 0.005(4)
C5 0.041(4) 0.042(4) 0.050(4) -0.002(4) 0.023(3) -0.005(4)
C6 0.041(4) 0.037(4) 0.044(4) 0.000(3) 0.024(3) -0.008(3)
C7 0.031(3) 0.026(3) 0.042(3) 0.001(3) 0.016(3) -0.008(3)
C8 0.032(4) 0.034(4) 0.047(4) 0.011(3) 0.006(3) 0.004(3)
C9 0.037(4) 0.047(4) 0.052(5) 0.012(4) 0.012(4) 0.010(4)
C10 0.038(5) 0.061(5) 0.061(5) 0.010(4) -0.002(4) 0.013(4)
C11 0.046(5) 0.062(5) 0.052(5) 0.011(4) 0.002(4) 0.008(4)
C12 0.040(4) 0.049(4) 0.047(4) 0.008(4) 0.011(4) 0.010(4)
C13 0.031(4) 0.034(4) 0.041(4) 0.006(3) 0.007(3) 0.006(3)
C14 0.031(3) 0.031(3) 0.039(4) 0.000(3) 0.010(3) -0.001(3)
C15 0.049(4) 0.030(3) 0.053(4) 0.004(3) 0.021(3) -0.004(3)
C16 0.061(5) 0.033(4) 0.056(5) 0.011(4) 0.012(4) 0.002(4)
C17 0.071(6) 0.035(5) 0.078(6) 0.003(4) 0.019(5) -0.007(4)
C18 0.065(6) 0.047(5) 0.080(6) 0.000(5) 0.010(5) -0.014(5)
C19 0.060(5) 0.042(4) 0.067(5) -0.001(4) 0.008(4) -0.011(4)
C20 0.047(4) 0.034(4) 0.046(4) -0.002(3) 0.019(3) -0.005(3)
C21 0.032(3) 0.028(3) 0.038(3) 0.003(3) 0.015(3) -0.004(3)
C22 0.037(4) 0.056(4) 0.047(4) 0.003(4) 0.008(3) -0.001(4)
C23 0.037(4) 0.090(6) 0.049(5) 0.006(5) 0.000(4) -0.011(5)
C24 0.047(5) 0.120(7) 0.059(5) 0.008(5) 0.001(5) -0.009(5)
C25 0.058(5) 0.129(7) 0.056(5) 0.013(6) 0.004(5) -0.007(6)
C26 0.044(4) 0.105(6) 0.050(4) 0.009(5) 0.011(4) -0.011(5)
C27 0.040(4) 0.061(4) 0.036(4) 0.004(3) 0.006(3) 0.001(4)
C28 0.032(4) 0.046(4) 0.039(4) 0.002(3) 0.010(3) -0.008(3)
C29 0.035(4) 0.047(4) 0.044(4) 0.007(3) 0.021(3) 0.003(3)
C30 0.049(4) 0.042(4) 0.054(4) 0.002(4) 0.025(4) 0.000(4)
C31 0.078(5) 0.041(4) 0.066(5) 0.009(4) 0.021(4) 0.001(4)
C32 0.096(6) 0.050(5) 0.084(6) 0.014(5) 0.017(5) 0.003(5)
C33 0.100(7) 0.050(6) 0.098(7) 0.007(5) 0.021(6) 0.000(6)
C34 0.104(6) 0.059(5) 0.082(6) -0.007(5) 0.030(5) -0.005(6)
C35 0.074(5) 0.048(5) 0.065(5) -0.002(4) 0.023(4) -0.005(4)
C36 0.030(4) 0.037(4) 0.039(3) 0.012(3) 0.009(3) -0.001(3)
C37 0.043(4) 0.034(4) 0.046(4) 0.003(3) 0.013(3) 0.003(3)
C38 0.046(4) 0.040(4) 0.058(4) -0.005(4) 0.012(4) 0.003(4)
C39 0.062(5) 0.039(5) 0.069(5) -0.005(4) 0.007(4) -0.001(4)
C40 0.072(6) 0.047(5) 0.065(5) -0.012(5) 0.012(5) 0.010(5)
C41 0.060(5) 0.052(5) 0.063(5) -0.006(4) 0.021(4) 0.014(4)
C42 0.048(4) 0.042(4) 0.060(4) 0.000(4) 0.021(4) 0.008(4)
C43 0.037(4) 0.041(4) 0.035(4) 0.001(3) 0.013(3) -0.006(3)
C44 0.032(4) 0.044(4) 0.033(4) -0.010(3) 0.011(3) -0.002(3)
C45 0.054(4) 0.046(4) 0.050(4) -0.008(4) 0.014(4) 0.003(4)
C46 0.067(5) 0.054(5) 0.059(5) -0.013(4) 0.012(4) 0.012(4)
C47 0.057(6) 0.073(6) 0.069(6) -0.021(5) 0.005(5) 0.015(5)
C48 0.055(5) 0.079(6) 0.063(5) -0.021(5) 0.026(4) 0.000(5)
C49 0.044(4) 0.055(4) 0.052(4) -0.012(4) 0.022(4) -0.004(4)
C50 0.035(4) 0.038(4) 0.035(3) 0.006(3) 0.020(3) 0.003(3)
C51 0.041(4) 0.039(4) 0.049(4) -0.002(3) 0.018(3) -0.006(4)
C52 0.048(5) 0.044(4) 0.069(5) -0.012(4) 0.027(4) 0.000(4)
C53 0.065(5) 0.040(5) 0.076(5) -0.018(4) 0.024(5) -0.008(4)
C54 0.059(5) 0.056(5) 0.080(6) -0.009(5) 0.025(5) -0.021(5)
C55 0.047(5) 0.052(5) 0.067(5) -0.008(4) 0.022(4) -0.013(4)
C56 0.044(4) 0.034(4) 0.064(4) -0.010(4) 0.018(4) -0.004(4)
C57 0.047(4) 0.052(4) 0.060(4) 0.014(4) 0.026(4) -0.001(4)
C58 0.059(6) 0.065(6) 0.089(6) 0.014(5) 0.036(5) -0.005(5)
C59 0.076(6) 0.053(5) 0.081(6) 0.017(5) 0.040(5) -0.011(5)
C60 0.069(6) 0.053(5) 0.070(6) 0.019(5) 0.025(5) -0.002(5)
C61 0.052(4) 0.048(4) 0.049(4) 0.014(4) 0.022(4) 0.006(4)
C62 0.038(4) 0.063(5) 0.053(4) -0.006(4) 0.017(4) -0.011(4)
C63 0.045(5) 0.066(5) 0.071(6) -0.001(5) 0.026(4) -0.017(5)
C64 0.044(5) 0.053(5) 0.070(5) 0.011(5) 0.025(4) 0.004(4)
C65 0.050(5) 0.067(5) 0.053(5) 0.000(4) 0.023(4) 0.002(4)
C66 0.037(4) 0.044(4) 0.050(4) 0.003(4) 0.016(3) -0.009(3)
C67 0.062(4) 0.056(4) 0.085(5) -0.016(4) 0.024(4) -0.007(4)
C68 0.082(5) 0.064(5) 0.090(5) -0.016(5) 0.029(5) -0.014(5)
C69 0.109(7) 0.072(6) 0.137(7) -0.004(6) 0.011(6) -0.012(6)
C70 0.118(7) 0.072(6) 0.154(7) -0.014(6) -0.004(7) 0.011(6)
C71 0.086(6) 0.065(5) 0.118(6) -0.010(5) -0.001(5) 0.002(5)
C72 0.081(5) 0.057(4) 0.084(5) -0.008(4) 0.032(4) -0.008(4)
C73 0.107(6) 0.076(6) 0.113(6) -0.013(6) 0.046(6) -0.031(5)
C74 0.125(8) 0.088(7) 0.124(8) -0.028(7) 0.042(7) -0.050(7)
C75 0.145(8) 0.090(7) 0.124(8) -0.035(7) 0.052(7) -0.040(7)
C76 0.100(6) 0.071(5) 0.094(6) -0.021(5) 0.041(5) -0.031(5)
C77 0.068(6) 0.056(6) 0.078(6) -0.005(5) 0.019(5) -0.001(5)
C78 0.064(5) 0.057(5) 0.073(5) 0.000(4) 0.016(4) -0.009(4)
C79 0.056(4) 0.066(5) 0.066(4) 0.008(4) 0.018(4) -0.010(4)
C80 0.063(5) 0.075(6) 0.073(5) 0.002(5) 0.023(5) 0.007(5)
C81 0.072(6) 0.052(6) 0.086(6) 0.006(5) 0.017(5) 0.008(5)
C82 0.081(5) 0.073(5) 0.075(5) 0.000(5) 0.024(4) 0.003(5)
C83 0.110(7) 0.103(7) 0.096(7) -0.002(6) 0.047(6) -0.004(7)
C84 0.106(7) 0.098(7) 0.089(6) 0.022(6) 0.037(6) -0.013(6)
C85 0.093(7) 0.083(7) 0.094(7) 0.031(6) 0.011(6) -0.005(6)
C86 0.073(6) 0.074(6) 0.078(6) 0.014(5) 0.006(5) 0.004(5)
C87 0.163(10) 0.126(8) 0.188(10) -0.018(9) 0.000(9) -0.013(8)
C88 0.171(11) 0.131(9) 0.208(11) -0.018(9) -0.001(10) -0.002(10)
C89 0.173(11) 0.144(9) 0.213(11) -0.024(10) -0.003(11) 0.001(9)
C90 0.192(10) 0.152(9) 0.218(11) -0.022(9) -0.005(10) 0.010(9)
C91 0.163(9) 0.122(8) 0.204(9) -0.028(8) 0.004(9) 0.001(8)
C92 0.325(13) 0.196(13) 0.318(15) -0.014(13) -0.043(13) -0.002(13)
C93 0.301(12) 0.189(12) 0.291(14) -0.012(12) -0.040(12) 0.008(11)
C94 0.312(13) 0.191(13) 0.308(14) -0.016(13) -0.051(13) 0.000(13)
C95 0.277(12) 0.180(11) 0.282(13) -0.010(12) -0.040(12) -0.002(12)
C96 0.309(13) 0.199(13) 0.304(15) -0.026(13) -0.041(14) -0.010(13)
C97 0.170(10) 0.164(10) 0.163(10) -0.018(10) -0.009(10) 0.002(9)
C98 0.123(6) 0.133(6) 0.131(6) 0.007(6) -0.004(6) 0.000(6)
C99 0.147(10) 0.147(10) 0.179(10) -0.005(9) -0.019(9) -0.026(9)
 
_geom_special_details
;
 All esds (except the esd in the dihedral angle between two l.s. planes)
 are estimated using the full covariance matrix.  The cell esds are taken
 into account individually in the estimation of esds in distances, angles
 and torsion angles; correlations between esds in cell parameters are only
 used when they are defined by crystal symmetry.  An approximate (isotropic)
 treatment of cell esds is used for estimating esds involving l.s. planes.
;
 
loop_
 _geom_bond_atom_site_label_1
 _geom_bond_atom_site_label_2
 _geom_bond_distance
 _geom_bond_site_symmetry_2
 _geom_bond_publ_flag
N9 C77 1.297(12) . ?
N9 C81 1.281(13) . ?
N11 C86 1.270(13) . ?
N11 C82 1.259(13) . ?
N12 C96 1.373(9) . ?
N12 C92 1.384(9) . ?
N22 C87 1.34(2) . ?
N22 C91 1.40(2) . ?
Gd1 O11 2.295(5) . ?
Gd1 O5 2.320(5) . ?
Gd1 O13 2.325(5) . ?
Gd1 O14 2.336(5) . ?
Gd1 O3 2.342(5) . ?
Gd1 O16 2.382(5) . ?
Gd1 O20 2.398(5) . ?
Gd1 O8 2.432(5) . ?
Fe1 O7 1.895(6) . ?
Fe1 O5 1.948(5) . ?
Fe1 O15 1.995(6) . ?
Fe1 O6 2.012(5) . ?
Fe1 N3 2.053(6) . ?
Fe1 N6 2.146(7) . ?
Fe2 O4 1.908(5) . ?
Fe2 O2 1.965(5) . ?
Fe2 O17 1.970(6) . ?
Fe2 O3 2.005(5) . ?
Fe2 N2 2.012(6) . ?
Fe2 N7 2.174(8) . ?
Fe3 O18 1.912(6) . ?
Fe3 O12 1.952(6) . ?
Fe3 O9 1.958(6) . ?
Fe3 O8 2.012(5) . ?
Fe3 N4 2.035(6) . ?
Fe3 N5 2.179(6) . ?
Fe4 O1 1.875(5) . ?
Fe4 O10 1.972(6) . ?
Fe4 O20 1.974(5) . ?
Fe4 O19 1.995(6) . ?
Fe4 N1 2.055(7) . ?
Fe4 N8 2.219(8) . ?
N1 C7 1.314(10) . ?
N1 O3 1.385(7) . ?
N2 C14 1.290(9) . ?
N2 O5 1.402(8) . ?
N3 C21 1.305(10) . ?
N3 O8 1.374(8) . ?
N4 C28 1.310(10) . ?
N4 O20 1.413(8) . ?
N5 C62 1.309(10) . ?
N5 C66 1.317(10) . ?
N6 C57 1.326(11) . ?
N6 C61 1.334(10) . ?
N7 C71 1.271(14) . ?
N7 C67 1.291(12) . ?
N8 C72 1.271(12) . ?
N8 C76 1.282(13) . ?
N13 C97 1.374(9) . ?
N13 C99 1.379(9) . ?
O1 C1 1.306(10) . ?
O2 C7 1.298(9) . ?
O4 C8 1.327(9) . ?
O6 C14 1.291(9) . ?
O7 C15 1.299(10) . ?
O9 C21 1.271(9) . ?
O10 C29 1.268(10) . ?
O11 C29 1.233(9) . ?
O12 C36 1.269(9) . ?
O13 C36 1.243(9) . ?
O14 C43 1.223(9) . ?
O15 C43 1.227(9) . ?
O16 C50 1.263(9) . ?
O17 C50 1.247(9) . ?
O18 C22 1.308(10) . ?
O19 C28 1.268(9) . ?
C1 C2 1.388(11) . ?
C1 C6 1.398(12) . ?
C2 C3 1.350(13) . ?
C3 C4 1.358(13) . ?
C4 C5 1.352(11) . ?
C5 C6 1.385(11) . ?
C6 C7 1.470(11) . ?
C8 C9 1.394(11) . ?
C8 C13 1.396(11) . ?
C9 C10 1.339(12) . ?
C10 C11 1.369(13) . ?
C11 C12 1.381(12) . ?
C12 C13 1.391(11) . ?
C13 C14 1.474(11) . ?
C15 C16 1.377(11) . ?
C15 C20 1.410(12) . ?
C16 C17 1.336(13) . ?
C17 C18 1.381(14) . ?
C18 C19 1.334(13) . ?
C19 C20 1.383(12) . ?
C20 C21 1.441(11) . ?
C22 C23 1.393(12) . ?
C22 C27 1.392(12) . ?
C23 C24 1.359(13) . ?
C24 C25 1.361(15) . ?
C25 C26 1.380(13) . ?
C26 C27 1.392(12) . ?
C27 C28 1.471(11) . ?
C29 C30 1.447(12) . ?
C30 C35 1.371(8) . ?
C30 C31 1.375(8) . ?
C31 C32 1.372(8) . ?
C32 C33 1.368(9) . ?
C33 C34 1.375(9) . ?
C34 C35 1.367(8) . ?
C36 C37 1.419(11) . ?
C37 C38 1.358(8) . ?
C37 C42 1.370(8) . ?
C38 C39 1.360(8) . ?
C39 C40 1.376(8) . ?
C40 C41 1.361(8) . ?
C41 C42 1.364(8) . ?
C43 C44 1.468(11) . ?
C44 C45 1.362(8) . ?
C44 C49 1.373(8) . ?
C45 C46 1.378(8) . ?
C46 C47 1.364(8) . ?
C47 C48 1.359(8) . ?
C48 C49 1.379(8) . ?
C50 C51 1.432(11) . ?
C51 C52 1.359(8) . ?
C51 C56 1.372(8) . ?
C52 C53 1.375(8) . ?
C53 C54 1.373(8) . ?
C54 C55 1.361(8) . ?
C55 C56 1.362(8) . ?
C57 C58 1.344(12) . ?
C58 C59 1.349(14) . ?
C59 C60 1.372(14) . ?
C60 C61 1.346(12) . ?
C62 C63 1.352(12) . ?
C63 C64 1.349(13) . ?
C64 C65 1.349(13) . ?
C65 C66 1.353(12) . ?
C67 C68 1.345(14) . ?
C68 C69 1.278(17) . ?
C69 C70 1.334(19) . ?
C70 C71 1.396(17) . ?
C72 C73 1.336(15) . ?
C73 C74 1.260(17) . ?
C74 C75 1.330(18) . ?
C75 C76 1.355(16) . ?
C77 C78 1.358(14) . ?
C78 C79 1.335(14) . ?
C79 C80 1.310(14) . ?
C80 C81 1.361(15) . ?
C82 C83 1.349(16) . ?
C83 C84 1.310(17) . ?
C84 C85 1.336(18) . ?
C85 C86 1.368(16) . ?
C87 C88 1.25(2) . ?
C88 C89 1.43(3) . ?
C89 C90 1.33(3) . ?
C90 C91 1.31(3) . ?
C92 C93 1.372(9) . ?
C93 C94 1.365(9) . ?
C94 C95 1.369(9) . ?
C95 C96 1.371(9) . ?
C97 C98 1.374(9) . ?
C97 C99 1.48(2) 3_566 ?
C98 C99 1.379(9) . ?
C99 C97 1.48(2) 3_566 ?
 
loop_
 _geom_angle_atom_site_label_1
 _geom_angle_atom_site_label_2
 _geom_angle_atom_site_label_3
 _geom_angle
 _geom_angle_site_symmetry_1
 _geom_angle_site_symmetry_3
 _geom_angle_publ_flag
C77 N9 C81 121.5(10) . . ?
C86 N11 C82 127.4(12) . . ?
C96 N12 C92 119.4(12) . . ?
C87 N22 C91 117(2) . . ?
O11 Gd1 O5 143.56(19) . . ?
O11 Gd1 O13 75.3(2) . . ?
O5 Gd1 O13 140.75(19) . . ?
O11 Gd1 O14 120.0(2) . . ?
O5 Gd1 O14 76.73(19) . . ?
O13 Gd1 O14 75.8(2) . . ?
O11 Gd1 O3 80.10(19) . . ?
O5 Gd1 O3 69.62(17) . . ?
O13 Gd1 O3 143.68(19) . . ?
O14 Gd1 O3 140.42(19) . . ?
O11 Gd1 O16 73.09(19) . . ?
O5 Gd1 O16 81.14(18) . . ?
O13 Gd1 O16 118.28(19) . . ?
O14 Gd1 O16 76.43(18) . . ?
O3 Gd1 O16 78.33(18) . . ?
O11 Gd1 O20 76.91(19) . . ?
O5 Gd1 O20 109.98(18) . . ?
O13 Gd1 O20 77.98(19) . . ?
O14 Gd1 O20 143.02(18) . . ?
O3 Gd1 O20 70.63(18) . . ?
O16 Gd1 O20 139.82(17) . . ?
O11 Gd1 O8 140.09(19) . . ?
O5 Gd1 O8 72.64(17) . . ?
O13 Gd1 O8 73.68(18) . . ?
O14 Gd1 O8 75.34(18) . . ?
O3 Gd1 O8 112.27(18) . . ?
O16 Gd1 O8 145.03(17) . . ?
O20 Gd1 O8 72.58(17) . . ?
O7 Fe1 O5 99.9(2) . . ?
O7 Fe1 O15 159.8(2) . . ?
O5 Fe1 O15 98.1(2) . . ?
O7 Fe1 O6 91.9(2) . . ?
O5 Fe1 O6 77.5(2) . . ?
O15 Fe1 O6 100.8(2) . . ?
O7 Fe1 N3 84.3(3) . . ?
O5 Fe1 N3 81.5(2) . . ?
O15 Fe1 N3 89.4(2) . . ?
O6 Fe1 N3 157.7(2) . . ?
O7 Fe1 N6 83.5(3) . . ?
O5 Fe1 N6 171.3(3) . . ?
O15 Fe1 N6 80.0(2) . . ?
O6 Fe1 N6 94.5(2) . . ?
N3 Fe1 N6 106.8(3) . . ?
O4 Fe2 O2 105.7(2) . . ?
O4 Fe2 O17 89.2(2) . . ?
O2 Fe2 O17 92.7(2) . . ?
O4 Fe2 O3 175.0(2) . . ?
O2 Fe2 O3 78.0(2) . . ?
O17 Fe2 O3 94.0(2) . . ?
O4 Fe2 N2 88.3(2) . . ?
O2 Fe2 N2 164.3(3) . . ?
O17 Fe2 N2 94.6(2) . . ?
O3 Fe2 N2 87.7(2) . . ?
O4 Fe2 N7 89.0(3) . . ?
O2 Fe2 N7 86.0(3) . . ?
O17 Fe2 N7 177.5(3) . . ?
O3 Fe2 N7 87.9(3) . . ?
N2 Fe2 N7 87.1(3) . . ?
O18 Fe3 O12 96.3(3) . . ?
O18 Fe3 O9 96.6(3) . . ?
O12 Fe3 O9 161.5(2) . . ?
O18 Fe3 O8 174.6(2) . . ?
O12 Fe3 O8 89.1(2) . . ?
O9 Fe3 O8 78.1(2) . . ?
O18 Fe3 N4 87.1(2) . . ?
O12 Fe3 N4 96.9(3) . . ?
O9 Fe3 N4 96.9(3) . . ?
O8 Fe3 N4 92.8(2) . . ?
O18 Fe3 N5 88.5(3) . . ?
O12 Fe3 N5 83.1(2) . . ?
O9 Fe3 N5 84.0(2) . . ?
O8 Fe3 N5 91.7(2) . . ?
N4 Fe3 N5 175.5(3) . . ?
O1 Fe4 O10 90.0(2) . . ?
O1 Fe4 O20 175.5(2) . . ?
O10 Fe4 O20 92.9(2) . . ?
O1 Fe4 O19 104.3(2) . . ?
O10 Fe4 O19 90.6(2) . . ?
O20 Fe4 O19 79.0(2) . . ?
O1 Fe4 N1 89.1(2) . . ?
O10 Fe4 N1 99.5(3) . . ?
O20 Fe4 N1 87.1(2) . . ?
O19 Fe4 N1 163.2(2) . . ?
O1 Fe4 N8 89.0(3) . . ?
O10 Fe4 N8 170.7(3) . . ?
O20 Fe4 N8 88.6(3) . . ?
O19 Fe4 N8 80.7(3) . . ?
N1 Fe4 N8 89.7(3) . . ?
C7 N1 O3 112.1(6) . . ?
C7 N1 Fe4 128.5(5) . . ?
O3 N1 Fe4 119.1(4) . . ?
C14 N2 O5 112.1(6) . . ?
C14 N2 Fe2 130.6(5) . . ?
O5 N2 Fe2 115.9(4) . . ?
C21 N3 O8 110.1(6) . . ?
C21 N3 Fe1 133.8(5) . . ?
O8 N3 Fe1 115.2(4) . . ?
C28 N4 O20 112.7(6) . . ?
C28 N4 Fe3 130.5(6) . . ?
O20 N4 Fe3 116.3(4) . . ?
C62 N5 C66 117.3(7) . . ?
C62 N5 Fe3 121.1(6) . . ?
C66 N5 Fe3 121.5(6) . . ?
C57 N6 C61 117.9(8) . . ?
C57 N6 Fe1 121.7(6) . . ?
C61 N6 Fe1 119.9(6) . . ?
C71 N7 C67 117.4(10) . . ?
C71 N7 Fe2 118.3(8) . . ?
C67 N7 Fe2 124.3(7) . . ?
C72 N8 C76 114.2(10) . . ?
C72 N8 Fe4 123.5(7) . . ?
C76 N8 Fe4 121.9(7) . . ?
C97 N13 C99 120.3(14) . . ?
C1 O1 Fe4 131.8(5) . . ?
C7 O2 Fe2 115.0(5) . . ?
N1 O3 Fe2 114.4(4) . . ?
N1 O3 Gd1 122.5(4) . . ?
Fe2 O3 Gd1 118.7(2) . . ?
C8 O4 Fe2 131.4(5) . . ?
N2 O5 Fe1 114.2(4) . . ?
N2 O5 Gd1 118.8(4) . . ?
Fe1 O5 Gd1 123.2(2) . . ?
C14 O6 Fe1 112.1(5) . . ?
C15 O7 Fe1 127.9(5) . . ?
N3 O8 Fe3 111.9(4) . . ?
N3 O8 Gd1 118.2(4) . . ?
Fe3 O8 Gd1 118.0(2) . . ?
C21 O9 Fe3 111.3(5) . . ?
C29 O10 Fe4 126.3(5) . . ?
C29 O11 Gd1 138.9(6) . . ?
C36 O12 Fe3 129.1(5) . . ?
C36 O13 Gd1 144.1(5) . . ?
C43 O14 Gd1 134.2(5) . . ?
C43 O15 Fe1 132.9(5) . . ?
C50 O16 Gd1 140.6(5) . . ?
C50 O17 Fe2 129.7(5) . . ?
C22 O18 Fe3 134.6(5) . . ?
C28 O19 Fe4 113.4(5) . . ?
N4 O20 Fe4 112.9(4) . . ?
N4 O20 Gd1 124.1(4) . . ?
Fe4 O20 Gd1 119.3(2) . . ?
O1 C1 C2 117.9(8) . . ?
O1 C1 C6 124.2(7) . . ?
C2 C1 C6 118.0(8) . . ?
C3 C2 C1 121.1(9) . . ?
C2 C3 C4 121.2(9) . . ?
C5 C4 C3 119.4(9) . . ?
C4 C5 C6 121.5(9) . . ?
C5 C6 C1 119.0(8) . . ?
C5 C6 C7 116.1(8) . . ?
C1 C6 C7 124.9(8) . . ?
O2 C7 N1 120.4(7) . . ?
O2 C7 C6 119.2(7) . . ?
N1 C7 C6 120.4(7) . . ?
O4 C8 C9 118.8(8) . . ?
O4 C8 C13 123.5(7) . . ?
C9 C8 C13 117.6(8) . . ?
C10 C9 C8 123.8(9) . . ?
C9 C10 C11 119.4(9) . . ?
C10 C11 C12 118.7(9) . . ?
C11 C12 C13 122.7(9) . . ?
C12 C13 C8 117.7(8) . . ?
C12 C13 C14 118.8(8) . . ?
C8 C13 C14 123.5(7) . . ?
O6 C14 N2 120.5(7) . . ?
O6 C14 C13 118.7(7) . . ?
N2 C14 C13 120.8(7) . . ?
O7 C15 C16 118.7(8) . . ?
O7 C15 C20 124.9(8) . . ?
C16 C15 C20 116.4(9) . . ?
C17 C16 C15 120.4(9) . . ?
C16 C17 C18 124.1(9) . . ?
C19 C18 C17 116.6(10) . . ?
C18 C19 C20 121.7(10) . . ?
C19 C20 C15 120.8(8) . . ?
C19 C20 C21 116.1(8) . . ?
C15 C20 C21 123.0(8) . . ?
O9 C21 N3 124.0(7) . . ?
O9 C21 C20 119.8(7) . . ?
N3 C21 C20 116.2(7) . . ?
O18 C22 C23 118.8(8) . . ?
O18 C22 C27 121.5(8) . . ?
C23 C22 C27 119.6(8) . . ?
C24 C23 C22 122.3(10) . . ?
C23 C24 C25 119.2(10) . . ?
C24 C25 C26 119.4(10) . . ?
C25 C26 C27 123.1(10) . . ?
C26 C27 C22 116.4(8) . . ?
C26 C27 C28 117.9(8) . . ?
C22 C27 C28 125.6(8) . . ?
O19 C28 N4 121.3(8) . . ?
O19 C28 C27 118.5(7) . . ?
N4 C28 C27 120.1(7) . . ?
O11 C29 O10 125.0(8) . . ?
O11 C29 C30 119.1(8) . . ?
O10 C29 C30 115.9(7) . . ?
C35 C30 C31 121.9(9) . . ?
C35 C30 C29 118.0(8) . . ?
C31 C30 C29 120.2(8) . . ?
C32 C31 C30 120.3(9) . . ?
C33 C32 C31 117.4(10) . . ?
C32 C33 C34 122.5(11) . . ?
C35 C34 C33 119.9(10) . . ?
C34 C35 C30 118.0(10) . . ?
O13 C36 O12 123.0(8) . . ?
O13 C36 C37 120.4(7) . . ?
O12 C36 C37 116.5(7) . . ?
C38 C37 C42 120.8(8) . . ?
C38 C37 C36 119.3(7) . . ?
C42 C37 C36 119.9(7) . . ?
C37 C38 C39 119.6(8) . . ?
C38 C39 C40 119.4(9) . . ?
C41 C40 C39 121.3(9) . . ?
C40 C41 C42 118.7(9) . . ?
C41 C42 C37 120.1(9) . . ?
O14 C43 O15 125.5(8) . . ?
O14 C43 C44 119.6(7) . . ?
O15 C43 C44 114.9(7) . . ?
C45 C44 C49 119.4(8) . . ?
C45 C44 C43 119.0(7) . . ?
C49 C44 C43 121.4(7) . . ?
C44 C45 C46 119.5(9) . . ?
C47 C46 C45 120.9(10) . . ?
C48 C47 C46 120.1(10) . . ?
C47 C48 C49 119.1(9) . . ?
C44 C49 C48 121.0(9) . . ?
O17 C50 O16 122.8(8) . . ?
O17 C50 C51 115.3(7) . . ?
O16 C50 C51 121.9(7) . . ?
C52 C51 C56 119.1(8) . . ?
C52 C51 C50 120.1(7) . . ?
C56 C51 C50 120.8(7) . . ?
C51 C52 C53 118.2(8) . . ?
C54 C53 C52 121.7(9) . . ?
C55 C54 C53 120.3(9) . . ?
C54 C55 C56 117.3(9) . . ?
C55 C56 C51 123.3(8) . . ?
N6 C57 C58 122.6(9) . . ?
C57 C58 C59 118.8(10) . . ?
C58 C59 C60 120.2(10) . . ?
C61 C60 C59 117.6(10) . . ?
N6 C61 C60 122.9(9) . . ?
N5 C62 C63 123.5(9) . . ?
C64 C63 C62 118.7(10) . . ?
C65 C64 C63 118.7(9) . . ?
C64 C65 C66 119.3(10) . . ?
N5 C66 C65 122.6(9) . . ?
N7 C67 C68 125.3(11) . . ?
C69 C68 C67 117.6(13) . . ?
C68 C69 C70 120.3(15) . . ?
C69 C70 C71 118.7(15) . . ?
N7 C71 C70 120.6(13) . . ?
N8 C72 C73 126.4(12) . . ?
C74 C73 C72 118.2(14) . . ?
C73 C74 C75 119.7(14) . . ?
C74 C75 C76 117.8(15) . . ?
N8 C76 C75 123.4(13) . . ?
N9 C77 C78 118.3(11) . . ?
C79 C78 C77 120.9(11) . . ?
C80 C79 C78 118.9(11) . . ?
C79 C80 C81 119.0(11) . . ?
N9 C81 C80 121.2(11) . . ?
N11 C82 C83 117.3(13) . . ?
C84 C83 C82 119.8(15) . . ?
C83 C84 C85 120.2(14) . . ?
C84 C85 C86 118.8(13) . . ?
N11 C86 C85 116.4(13) . . ?
C88 C87 N22 127(3) . . ?
C87 C88 C89 118(3) . . ?
C90 C89 C88 115(3) . . ?
C91 C90 C89 128(3) . . ?
C90 C91 N22 115(3) . . ?
C93 C92 N12 119.2(12) . . ?
C94 C93 C92 121.2(12) . . ?
C93 C94 C95 119.7(12) . . ?
C94 C95 C96 119.8(12) . . ?
C95 C96 N12 120.7(12) . . ?
C98 C97 C99 113.2(18) . 3_566 ?
N13 C97 C99 113.2(18) . 3_566 ?
C97 C98 C99 120.3(14) . . ?
C98 C99 C97 124.6(18) . 3_566 ?
N13 C99 C97 124.6(18) . 3_566 ?
 
_refine_diff_density_max    0.967
_refine_diff_density_min   -1.468
_refine_diff_density_rms    0.127

_shelx_res_file
;

    170624g.res created by SHELXL-2014/7

TITL 170624g in P2(1)/n
CELL 0.71073  14.2222  33.2476  19.3213  90.000 105.913  90.000
ZERR    4.00   0.0013   0.0028   0.0017   0.000   0.003   0.000
LATT 1
SYMM 0.5-X, 0.5+Y, 0.5-Z
SFAC C  H  N  O  Fe Gd
UNIT 394 318 50 80 16 4
OMIT  -1.00  50.04
L.S. 10
ACTA
BOND
FMAP 2
PLAN 20
dfix 3.15 0.01 n9 n11
dfix 1.39 0.01 c44 c45 c45 c46 c46 c47 c47 c48 c48 c49 c49 c44
dfix 1.39 0.01 c30 c31 c31 c32 c32 c33 c33 c34 c34 c35 c35 c30
dfix 1.39 0.01 c51 c52 c52 c53 c53 c54 c54 c55 c55 c56 c56 c51
dfix 1.39 0.01 c37 c38 c38 c39 c39 c40 c40 c41 c41 c42 c42 c37
dfix 2.34 0.02 n12 c93 c93 c95 c95 n12 c92 c94 c94 c96 c96 c92 c97 c99
dfix 1.39 0.01 n12 c92 c92 c93 c93 c94 c94 c95 c95 c96 c96 n12 c97 c98 c98 c99
flat 0.02 n12 c92 c93 c94 c95 c96
simu 0.02 0.04 3.8
exyz n13 c98
eadp n13 c98
size 0.47 0.25 0.20
TEMP 25
WGHT    0.027500   75.333801
FVAR       0.17437
MOLE 1
N9    3    0.925637    0.741956    0.628656    11.00000    0.05752    0.05100 =
         0.07421    0.00878    0.01220   -0.00787
N11   3    0.066761    0.773057    0.569464    11.00000    0.06398    0.06191 =
         0.06715    0.00908    0.01377   -0.01352
AFIX  43
H22   2    0.027672    0.762522    0.591356    11.00000   -1.20000
AFIX   0
N12   3    0.889061    0.476630    0.644886    11.00000    0.32689    0.20869 =
         0.32939   -0.01441   -0.04590   -0.00995
N22   3    0.555196    0.373013    0.754580    11.00000    0.15972    0.12309 =
         0.19480   -0.01843    0.00789   -0.01676
GD1   6    0.469927    0.665659    0.750460    11.00000    0.02264    0.02626 =
         0.03392    0.00274    0.01109    0.00114
FE1   5    0.433288    0.587751    0.881637    11.00000    0.02780    0.03455 =
         0.03433    0.00609    0.01118    0.00045
FE2   5    0.687685    0.598458    0.774027    11.00000    0.02743    0.02965 =
         0.04058    0.00587    0.01308    0.00355
FE3   5    0.200396    0.639103    0.673261    11.00000    0.02483    0.03396 =
         0.03553    0.00323    0.00820   -0.00048
FE4   5    0.453871    0.643570    0.555698    11.00000    0.03391    0.03521 =
         0.03533    0.00385    0.01414    0.00171
N1    3    0.574613    0.624856    0.634612    11.00000    0.03728    0.02983 =
         0.03576    0.00439    0.01866   -0.00116
N2    3    0.613216    0.599484    0.848766    11.00000    0.02490    0.03742 =
         0.03860    0.00667    0.01258    0.00341
N3    3    0.326215    0.595017    0.786623    11.00000    0.03232    0.03121 =
         0.03667    0.00529    0.01028    0.00031
N4    3    0.281300    0.647388    0.602366    11.00000    0.02415    0.04040 =
         0.03908    0.00311    0.01347   -0.00154
N5    3    0.103636    0.630744    0.742159    11.00000    0.02984    0.04380 =
         0.04431    0.00591    0.01792   -0.00314
N6    3    0.362719    0.565663    0.959052    11.00000    0.04483    0.04042 =
         0.04905    0.01212    0.02094    0.00325
N7    3    0.622716    0.539749    0.742413    11.00000    0.04542    0.03863 =
         0.06819   -0.00114    0.01564    0.00410
N8    3    0.407502    0.579982    0.534496    11.00000    0.05742    0.04520 =
         0.05996   -0.00885    0.02428   -0.00848
PART 1
N13   3    0.038734    0.534947    0.539267    10.50000    0.12260    0.13331 =
         0.13067    0.00727   -0.00361   -0.00046
PART 0
O1    4    0.526090    0.638765    0.488185    11.00000    0.04676    0.05015 =
         0.04157    0.00576    0.02186    0.00659
O2    4    0.724270    0.597508    0.683082    11.00000    0.03819    0.04459 =
         0.04534    0.00252    0.01886    0.00549
O3    4    0.569696    0.622872    0.705153    11.00000    0.03534    0.03752 =
         0.03541    0.00343    0.01904    0.00421
O4    4    0.792306    0.572636    0.842970    11.00000    0.03185    0.04749 =
         0.04654    0.01086    0.01556    0.01315
O5    4    0.513980    0.609689    0.823928    11.00000    0.02504    0.03660 =
         0.03926    0.01199    0.01024    0.00582
O6    4    0.569340    0.581725    0.947378    11.00000    0.03380    0.04384 =
         0.03637    0.01062    0.01193   -0.00168
O7    4    0.429269    0.533001    0.853640    11.00000    0.04418    0.03266 =
         0.04901    0.00348    0.01213    0.00092
O8    4    0.319806    0.632906    0.757246    11.00000    0.02896    0.02849 =
         0.03718    0.00654    0.01061   -0.00133
O9    4    0.214150    0.580560    0.680666    11.00000    0.04162    0.03628 =
         0.04470    0.00217    0.00983   -0.00540
O10   4    0.477445    0.702090    0.560782    11.00000    0.05374    0.04008 =
         0.04282    0.00753    0.02191    0.00499
O11   4    0.524527    0.710135    0.679266    11.00000    0.04254    0.04221 =
         0.04743    0.00479    0.01941   -0.00672
O12   4    0.193200    0.695565    0.699093    11.00000    0.03272    0.03279 =
         0.05130    0.00697    0.01042    0.00537
O13   4    0.347405    0.713945    0.718247    11.00000    0.03372    0.03251 =
         0.06020    0.00373    0.01480    0.00295
O14   4    0.447433    0.687013    0.860001    11.00000    0.03820    0.03616 =
         0.04296   -0.00516    0.01962   -0.00187
O15   4    0.392912    0.639665    0.916714    11.00000    0.04112    0.03741 =
         0.04425   -0.00055    0.01797   -0.00350
O16   4    0.629083    0.686645    0.817334    11.00000    0.03435    0.03514 =
         0.04293   -0.00102    0.01393   -0.00012
O17   4    0.752196    0.650649    0.802558    11.00000    0.03240    0.03501 =
         0.05323   -0.00565    0.01539    0.00249
O18   4    0.087540    0.639670    0.592129    11.00000    0.03554    0.06254 =
         0.04494    0.00768    0.00968   -0.00331
O19   4    0.316757    0.652350    0.496238    11.00000    0.04071    0.05070 =
         0.04040    0.00621    0.01256   -0.00041
O20   4    0.383871    0.645104    0.630906    11.00000    0.02716    0.04024 =
         0.03375    0.00322    0.01057    0.00394
C1    1    0.610714    0.622235    0.492159    11.00000    0.04064    0.03913 =
         0.04810   -0.00013    0.02634   -0.00479
C2    1    0.637418    0.617445    0.428744    11.00000    0.05713    0.06145 =
         0.04611    0.00341    0.02846    0.00367
AFIX  43
H2    2    0.596142    0.626826    0.385736    11.00000   -1.20000
AFIX   0
C3    1    0.722322    0.599393    0.428469    11.00000    0.05831    0.07047 =
         0.05758   -0.00170    0.03383   -0.00168
AFIX  43
H3    2    0.738105    0.596197    0.385160    11.00000   -1.20000
AFIX   0
C4    1    0.785080    0.585819    0.490305    11.00000    0.04723    0.06103 =
         0.05908   -0.00897    0.03747    0.00474
AFIX  43
H4    2    0.844015    0.573965    0.489541    11.00000   -1.20000
AFIX   0
C5    1    0.761064    0.589704    0.553028    11.00000    0.04124    0.04224 =
         0.04999   -0.00210    0.02307   -0.00482
AFIX  43
H5    2    0.803551    0.579928    0.595208    11.00000   -1.20000
AFIX   0
C6    1    0.674627    0.607911    0.555846    11.00000    0.04149    0.03728 =
         0.04420   -0.00010    0.02391   -0.00811
C7    1    0.657245    0.610249    0.627328    11.00000    0.03126    0.02600 =
         0.04182    0.00109    0.01585   -0.00780
C8    1    0.807244    0.566086    0.912884    11.00000    0.03180    0.03362 =
         0.04749    0.01126    0.00590    0.00380
C9    1    0.897960    0.551511    0.952521    11.00000    0.03690    0.04734 =
         0.05241    0.01225    0.01192    0.00988
AFIX  43
H9    2    0.945798    0.547455    0.928690    11.00000   -1.20000
AFIX   0
C10   1    0.920222    0.543011    1.022912    11.00000    0.03824    0.06137 =
         0.06093    0.00977   -0.00156    0.01305
AFIX  43
H10   2    0.981842    0.533198    1.046704    11.00000   -1.20000
AFIX   0
C11   1    0.851500    0.548894    1.059528    11.00000    0.04569    0.06178 =
         0.05226    0.01100    0.00168    0.00802
AFIX  43
H11   2    0.865873    0.543486    1.108545    11.00000   -1.20000
AFIX   0
C12   1    0.760394    0.563019    1.022226    11.00000    0.03981    0.04949 =
         0.04699    0.00779    0.01095    0.00976
AFIX  43
H12   2    0.713605    0.566874    1.047074    11.00000   -1.20000
AFIX   0
C13   1    0.735701    0.571719    0.949033    11.00000    0.03083    0.03373 =
         0.04137    0.00576    0.00715    0.00631
C14   1    0.635323    0.585157    0.913283    11.00000    0.03076    0.03116 =
         0.03948    0.00000    0.00964   -0.00119
C15   1    0.354213    0.512530    0.817103    11.00000    0.04880    0.03024 =
         0.05276    0.00393    0.02076   -0.00359
C16   1    0.351810    0.471751    0.828949    11.00000    0.06131    0.03322 =
         0.05647    0.01095    0.01244    0.00150
AFIX  43
H16   2    0.401758    0.459712    0.864279    11.00000   -1.20000
AFIX   0
C17   1    0.278154    0.449374    0.789995    11.00000    0.07106    0.03482 =
         0.07799    0.00286    0.01890   -0.00725
AFIX  43
H17   2    0.278994    0.421940    0.799543    11.00000   -1.20000
AFIX   0
C18   1    0.200862    0.464448    0.736441    11.00000    0.06541    0.04688 =
         0.08006   -0.00008    0.01022   -0.01371
AFIX  43
H18   2    0.150644    0.447956    0.710565    11.00000   -1.20000
AFIX   0
C19   1    0.201839    0.503852    0.723682    11.00000    0.05958    0.04195 =
         0.06658   -0.00119    0.00789   -0.01089
AFIX  43
H19   2    0.151371    0.515053    0.687632    11.00000   -1.20000
AFIX   0
C20   1    0.275896    0.528488    0.762632    11.00000    0.04710    0.03394 =
         0.04626   -0.00213    0.01853   -0.00522
C21   1    0.270565    0.570128    0.741137    11.00000    0.03166    0.02809 =
         0.03838    0.00313    0.01545   -0.00441
C22   1    0.072583    0.646121    0.523177    11.00000    0.03660    0.05614 =
         0.04654    0.00325    0.00767   -0.00078
C23   1   -0.023134    0.647251    0.479370    11.00000    0.03726    0.08985 =
         0.04876    0.00635    0.00019   -0.01079
AFIX  43
H23   2   -0.074142    0.642780    0.499960    11.00000   -1.20000
AFIX   0
C24   1   -0.044562    0.654663    0.407550    11.00000    0.04726    0.12021 =
         0.05922    0.00779    0.00143   -0.00863
AFIX  43
H24   2   -0.109152    0.654950    0.379479    11.00000   -1.20000
AFIX   0
C25   1    0.029731    0.661660    0.377231    11.00000    0.05777    0.12871 =
         0.05628    0.01255    0.00358   -0.00749
AFIX  43
H25   2    0.016310    0.667698    0.328494    11.00000   -1.20000
AFIX   0
C26   1    0.125112    0.659715    0.419464    11.00000    0.04350    0.10536 =
         0.04951    0.00852    0.01107   -0.01056
AFIX  43
H26   2    0.175167    0.663901    0.397794    11.00000   -1.20000
AFIX   0
C27   1    0.149926    0.651781    0.492969    11.00000    0.04035    0.06080 =
         0.03599    0.00365    0.00605    0.00076
C28   1    0.254351    0.650207    0.532030    11.00000    0.03228    0.04637 =
         0.03861    0.00242    0.00951   -0.00754
C29   1    0.498938    0.723424    0.617370    11.00000    0.03513    0.04665 =
         0.04442    0.00665    0.02136    0.00324
C30   1    0.495073    0.766526    0.606439    11.00000    0.04930    0.04156 =
         0.05381    0.00166    0.02527   -0.00048
C31   1    0.463550    0.782103    0.538018    11.00000    0.07827    0.04100 =
         0.06631    0.00883    0.02121    0.00066
AFIX  43
H31   2    0.448399    0.764904    0.498547    11.00000   -1.20000
AFIX   0
C32   1    0.454362    0.822889    0.527745    11.00000    0.09619    0.05021 =
         0.08379    0.01418    0.01743    0.00302
AFIX  43
H32   2    0.432168    0.833847    0.481860    11.00000   -1.20000
AFIX   0
C33   1    0.479099    0.846827    0.587585    11.00000    0.10033    0.05042 =
         0.09799    0.00717    0.02082    0.00039
AFIX  43
H33   2    0.472951    0.874559    0.581795    11.00000   -1.20000
AFIX   0
C34   1    0.512703    0.831430    0.655956    11.00000    0.10372    0.05863 =
         0.08182   -0.00719    0.02962   -0.00541
AFIX  43
H34   2    0.529297    0.848667    0.695348    11.00000   -1.20000
AFIX   0
C35   1    0.521711    0.790768    0.666001    11.00000    0.07428    0.04844 =
         0.06462   -0.00241    0.02302   -0.00529
AFIX  43
H35   2    0.545196    0.779883    0.711846    11.00000   -1.20000
AFIX   0
C36   1    0.261039    0.721555    0.716042    11.00000    0.02978    0.03666 =
         0.03946    0.01228    0.00926   -0.00148
C37   1    0.232956    0.761147    0.729198    11.00000    0.04284    0.03448 =
         0.04603    0.00348    0.01283    0.00338
C38   1    0.290611    0.792614    0.722278    11.00000    0.04553    0.03979 =
         0.05824   -0.00497    0.01188    0.00267
AFIX  43
H38   2    0.348135    0.788177    0.709385    11.00000   -1.20000
AFIX   0
C39   1    0.263652    0.830663    0.734332    11.00000    0.06205    0.03851 =
         0.06851   -0.00470    0.00677   -0.00120
AFIX  43
H39   2    0.302172    0.852454    0.729178    11.00000   -1.20000
AFIX   0
C40   1    0.178931    0.836636    0.754211    11.00000    0.07235    0.04696 =
         0.06502   -0.01202    0.01242    0.01039
AFIX  43
H40   2    0.160064    0.862693    0.761721    11.00000   -1.20000
AFIX   0
C41   1    0.122194    0.805154    0.763098    11.00000    0.06033    0.05203 =
         0.06324   -0.00551    0.02112    0.01397
AFIX  43
H41   2    0.066110    0.809442    0.777975    11.00000   -1.20000
AFIX   0
C42   1    0.149168    0.767184    0.749765    11.00000    0.04777    0.04179 =
         0.06001   -0.00015    0.02059    0.00788
AFIX  43
H42   2    0.110608    0.745351    0.754645    11.00000   -1.20000
AFIX   0
C43   1    0.398602    0.674813    0.898865    11.00000    0.03672    0.04146 =
         0.03527    0.00079    0.01345   -0.00570
C44   1    0.340013    0.703356    0.927579    11.00000    0.03230    0.04422 =
         0.03274   -0.01037    0.01060   -0.00206
C45   1    0.344632    0.743252    0.912816    11.00000    0.05442    0.04587 =
         0.05009   -0.00765    0.01353    0.00324
AFIX  43
H45   2    0.388039    0.752428    0.888059    11.00000   -1.20000
AFIX   0
C46   1    0.284477    0.769898    0.934857    11.00000    0.06732    0.05401 =
         0.05938   -0.01311    0.01164    0.01178
AFIX  43
H46   2    0.289396    0.797268    0.926552    11.00000   -1.20000
AFIX   0
C47   1    0.217797    0.756663    0.968700    11.00000    0.05697    0.07303 =
         0.06942   -0.02093    0.00500    0.01540
AFIX  43
H47   2    0.175675    0.774843    0.981389    11.00000   -1.20000
AFIX   0
C48   1    0.212850    0.716941    0.983896    11.00000    0.05510    0.07878 =
         0.06265   -0.02118    0.02585    0.00017
AFIX  43
H48   2    0.168218    0.707801    1.007619    11.00000   -1.20000
AFIX   0
C49   1    0.274906    0.690367    0.963662    11.00000    0.04380    0.05497 =
         0.05207   -0.01199    0.02195   -0.00444
AFIX  43
H49   2    0.272607    0.663213    0.974638    11.00000   -1.20000
AFIX   0
C50   1    0.717650    0.682827    0.817984    11.00000    0.03472    0.03845 =
         0.03481    0.00580    0.01991    0.00336
C51   1    0.785086    0.715699    0.835229    11.00000    0.04143    0.03943 =
         0.04868   -0.00215    0.01833   -0.00641
C52   1    0.755501    0.751891    0.854429    11.00000    0.04758    0.04404 =
         0.06863   -0.01152    0.02671   -0.00036
AFIX  43
H52   2    0.691018    0.756015    0.854936    11.00000   -1.20000
AFIX   0
C53   1    0.823440    0.782233    0.873076    11.00000    0.06452    0.03953 =
         0.07591   -0.01761    0.02397   -0.00821
AFIX  43
H53   2    0.804548    0.806958    0.887371    11.00000   -1.20000
AFIX   0
C54   1    0.918438    0.776991    0.871147    11.00000    0.05857    0.05630 =
         0.07959   -0.00870    0.02494   -0.02108
AFIX  43
H54   2    0.962543    0.798198    0.883260    11.00000   -1.20000
AFIX   0
C55   1    0.948354    0.740891    0.851584    11.00000    0.04683    0.05193 =
         0.06703   -0.00760    0.02210   -0.01303
AFIX  43
H55   2    1.012335    0.736893    0.849725    11.00000   -1.20000
AFIX   0
C56   1    0.880783    0.710870    0.834847    11.00000    0.04377    0.03423 =
         0.06362   -0.00956    0.01815   -0.00425
AFIX  43
H56   2    0.900472    0.685825    0.822534    11.00000   -1.20000
AFIX   0
C57   1    0.268532    0.572056    0.952020    11.00000    0.04653    0.05233 =
         0.05982    0.01391    0.02551   -0.00086
AFIX  43
H57   2    0.233956    0.588667    0.915030    11.00000   -1.20000
AFIX   0
C58   1    0.221067    0.555469    0.996262    11.00000    0.05900    0.06484 =
         0.08892    0.01367    0.03560   -0.00511
AFIX  43
H58   2    0.155082    0.560715    0.990262    11.00000   -1.20000
AFIX   0
C59   1    0.270932    0.531069    1.049527    11.00000    0.07585    0.05327 =
         0.08113    0.01690    0.03953   -0.01078
AFIX  43
H59   2    0.239048    0.519096    1.080280    11.00000   -1.20000
AFIX   0
C60   1    0.368544    0.523860    1.058479    11.00000    0.06933    0.05279 =
         0.07023    0.01940    0.02475   -0.00174
AFIX  43
H60   2    0.404256    0.507632    1.095652    11.00000   -1.20000
AFIX   0
C61   1    0.410732    0.541126    1.011513    11.00000    0.05172    0.04833 =
         0.04905    0.01370    0.02156    0.00633
AFIX  43
H61   2    0.476244    0.535712    1.015824    11.00000   -1.20000
AFIX   0
C62   1    0.026327    0.607654    0.722333    11.00000    0.03803    0.06281 =
         0.05303   -0.00646    0.01747   -0.01137
AFIX  43
H62   2    0.010969    0.596403    0.676527    11.00000   -1.20000
AFIX   0
C63   1   -0.032347    0.599302    0.764920    11.00000    0.04490    0.06560 =
         0.07132   -0.00094    0.02591   -0.01728
AFIX  43
H63   2   -0.085992    0.582375    0.748962    11.00000   -1.20000
AFIX   0
C64   1   -0.011569    0.616002    0.831030    11.00000    0.04387    0.05315 =
         0.06994    0.01087    0.02506    0.00425
AFIX  43
H64   2   -0.051443    0.611305    0.861124    11.00000   -1.20000
AFIX   0
C65   1    0.068179    0.639642    0.852596    11.00000    0.05001    0.06670 =
         0.05322    0.00020    0.02343    0.00247
AFIX  43
H65   2    0.085201    0.650856    0.898449    11.00000   -1.20000
AFIX   0
C66   1    0.123172    0.646874    0.806824    11.00000    0.03661    0.04444 =
         0.04975    0.00318    0.01631   -0.00854
AFIX  43
H66   2    0.176847    0.663893    0.821590    11.00000   -1.20000
AFIX   0
C67   1    0.529846    0.532754    0.723825    11.00000    0.06201    0.05594 =
         0.08544   -0.01593    0.02359   -0.00661
AFIX  43
H67   2    0.488416    0.554549    0.722540    11.00000   -1.20000
AFIX   0
C68   1    0.488148    0.496498    0.706166    11.00000    0.08205    0.06445 =
         0.09048   -0.01567    0.02949   -0.01357
AFIX  43
H68   2    0.420543    0.493502    0.692353    11.00000   -1.20000
AFIX   0
C69   1    0.544778    0.466313    0.709052    11.00000    0.10946    0.07244 =
         0.13690   -0.00431    0.01058   -0.01181
AFIX  43
H69   2    0.518367    0.440896    0.696343    11.00000   -1.20000
AFIX   0
C70   1    0.641576    0.471109    0.730211    11.00000    0.11831    0.07193 =
         0.15393   -0.01420   -0.00362    0.01066
AFIX  43
H70   2    0.683071    0.449069    0.734634    11.00000   -1.20000
AFIX   0
C71   1    0.679410    0.509851    0.745590    11.00000    0.08602    0.06518 =
         0.11840   -0.00999   -0.00140    0.00189
AFIX  43
H71   2    0.746709    0.513813    0.758275    11.00000   -1.20000
AFIX   0
C72   1    0.355266    0.561513    0.568140    11.00000    0.08056    0.05701 =
         0.08435   -0.00799    0.03165   -0.00757
AFIX  43
H72   2    0.342625    0.574847    0.606945    11.00000   -1.20000
AFIX   0
C73   1    0.316765    0.524825    0.553191    11.00000    0.10698    0.07575 =
         0.11293   -0.01281    0.04640   -0.03127
AFIX  43
H73   2    0.278491    0.513597    0.580244    11.00000   -1.20000
AFIX   0
C74   1    0.333695    0.505840    0.501461    11.00000    0.12530    0.08751 =
         0.12355   -0.02783    0.04242   -0.05041
AFIX  43
H74   2    0.306473    0.480528    0.489014    11.00000   -1.20000
AFIX   0
C75   1    0.390662    0.522143    0.464711    11.00000    0.14455    0.09033 =
         0.12432   -0.03538    0.05184   -0.04049
AFIX  43
H75   2    0.407895    0.507874    0.428628    11.00000   -1.20000
AFIX   0
C76   1    0.422754    0.560234    0.481596    11.00000    0.10022    0.07085 =
         0.09371   -0.02091    0.04086   -0.03063
AFIX  43
H76   2    0.457659    0.572701    0.453340    11.00000   -1.20000
AFIX   0
C77   1    0.920279    0.703015    0.628304    11.00000    0.06844    0.05582 =
         0.07823   -0.00467    0.01887   -0.00094
AFIX  43
H77   2    0.969166    0.687391    0.618260    11.00000   -1.20000
AFIX   0
C78   1    0.841469    0.685617    0.642973    11.00000    0.06403    0.05692 =
         0.07345    0.00044    0.01586   -0.00883
AFIX  43
H78   2    0.835917    0.657739    0.642282    11.00000   -1.20000
AFIX   0
C79   1    0.771882    0.707979    0.658367    11.00000    0.05571    0.06553 =
         0.06646    0.00751    0.01794   -0.01042
AFIX  43
H79   2    0.717285    0.695935    0.667190    11.00000   -1.20000
AFIX   0
C80   1    0.781776    0.747170    0.660839    11.00000    0.06308    0.07516 =
         0.07324    0.00195    0.02345    0.00712
AFIX  43
H80   2    0.734704    0.763376    0.672048    11.00000   -1.20000
AFIX   0
C81   1    0.862032    0.763806    0.646746    11.00000    0.07223    0.05167 =
         0.08628    0.00598    0.01689    0.00843
AFIX  43
H81   2    0.870846    0.791522    0.650313    11.00000   -1.20000
AFIX   0
C82   1    0.122194    0.749135    0.548894    11.00000    0.08056    0.07260 =
         0.07525    0.00005    0.02427    0.00256
AFIX  43
H82   2    0.119456    0.721555    0.556130    11.00000   -1.20000
AFIX   0
C83   1    0.185765    0.765102    0.515917    11.00000    0.10952    0.10343 =
         0.09597   -0.00248    0.04719   -0.00413
AFIX  43
H83   2    0.229711    0.748599    0.501491    11.00000   -1.20000
AFIX   0
C84   1    0.185363    0.803917    0.504301    11.00000    0.10555    0.09818 =
         0.08923    0.02160    0.03749   -0.01288
AFIX  43
H84   2    0.227667    0.814861    0.480199    11.00000   -1.20000
AFIX   0
C85   1    0.124372    0.827845    0.526963    11.00000    0.09287    0.08345 =
         0.09437    0.03146    0.01125   -0.00500
AFIX  43
H85   2    0.124308    0.855467    0.519360    11.00000   -1.20000
AFIX   0
C86   1    0.062005    0.810991    0.561555    11.00000    0.07304    0.07432 =
         0.07798    0.01432    0.00641    0.00412
AFIX  43
H86   2    0.018463    0.826487    0.578375    11.00000   -1.20000
AFIX   0
C87   1    0.568393    0.379167    0.825217    11.00000    0.16318    0.12635 =
         0.18810   -0.01773    0.00023   -0.01312
AFIX  43
H87   2    0.513814    0.387269    0.839298    11.00000   -1.20000
AFIX   0
C88   1    0.646284    0.375173    0.874173    11.00000    0.17078    0.13083 =
         0.20846   -0.01823   -0.00105   -0.00192
AFIX  43
H88   2    0.647692    0.377932    0.922345    11.00000   -1.20000
AFIX   0
C89   1    0.733005    0.366220    0.853432    11.00000    0.17275    0.14426 =
         0.21344   -0.02362   -0.00271    0.00057
AFIX  43
H89   2    0.794162    0.364401    0.886579    11.00000   -1.20000
AFIX   0
C90   1    0.719881    0.360691    0.783383    11.00000    0.19184    0.15200 =
         0.21845   -0.02228   -0.00491    0.01011
AFIX  43
H90   2    0.775402    0.354211    0.769135    11.00000   -1.20000
AFIX   0
C91   1    0.638056    0.363275    0.731944    11.00000    0.16271    0.12178 =
         0.20351   -0.02795    0.00357    0.00123
AFIX  43
H91   2    0.635100    0.358961    0.683836    11.00000   -1.20000
AFIX   0
C92   1    0.865259    0.436715    0.651432    11.00000    0.32528    0.19589 =
         0.31825   -0.01370   -0.04300   -0.00185
AFIX  43
H92   2    0.839391    0.421143    0.610666    11.00000   -1.20000
AFIX   0
C93   1    0.880301    0.420409    0.718800    11.00000    0.30076    0.18941 =
         0.29063   -0.01157   -0.04013    0.00801
AFIX  43
H93   2    0.864307    0.393607    0.723420    11.00000   -1.20000
AFIX   0
C94   1    0.918331    0.442827    0.779183    11.00000    0.31210    0.19102 =
         0.30797   -0.01556   -0.05096    0.00010
AFIX  43
H94   2    0.928009    0.431351    0.824495    11.00000   -1.20000
AFIX   0
C95   1    0.942155    0.482267    0.772740    11.00000    0.27655    0.18007 =
         0.28152   -0.00951   -0.04011   -0.00153
AFIX  43
H95   2    0.968970    0.497582    0.813677    11.00000   -1.20000
AFIX   0
C96   1    0.926392    0.499146    0.705782    11.00000    0.30883    0.19931 =
         0.30362   -0.02632   -0.04138   -0.01032
AFIX  43
H96   2    0.941146    0.526131    0.701580    11.00000   -1.20000
AFIX   0
C97   1    0.045970    0.532683    0.469918    11.00000    0.17006    0.16419 =
         0.16304   -0.01849   -0.00919    0.00176
AFIX  43
H97   2    0.068072    0.553769    0.446891    11.00000   -1.20000
PART 2
AFIX   0
C98   1    0.038734    0.534947    0.539267    10.50000    0.12260    0.13331 =
         0.13067    0.00727   -0.00361   -0.00046
AFIX  43
H98   2    0.070184    0.555561    0.569339    10.50000   -1.20000
PART 0
AFIX   0
C99   1   -0.014970    0.506780    0.564475    11.00000    0.14719    0.14662 =
         0.17944   -0.00497   -0.01878   -0.02587
AFIX  43
H99   2   -0.033015    0.512985    0.605996    11.00000   -1.20000
AFIX   0
hklf 4

REM  170624g in P2(1)/n
REM R1 =  0.0668 for   10476 Fo > 4sig(Fo)  and  0.1119 for all   15469 data
REM   1225 parameters refined using   4177 restraints

END

WGHT      0.0236     71.9942

REM Highest difference peak  0.967,  deepest hole -1.468,  1-sigma level  0.127
Q1    1   0.2385  0.7151  0.5400  11.00000  0.05    0.97
Q2    1   0.4355  0.7455  0.8812  11.00000  0.05    0.85
Q3    1   0.2175  0.6561  0.8606  11.00000  0.05    0.83
Q4    1   0.7016  0.6156  0.9608  11.00000  0.05    0.83
Q5    1   0.0000  0.5000  0.5000  10.50000  0.05    0.72
Q6    1   0.4386  0.6390  0.7590  11.00000  0.05    0.72
Q7    1   0.4630  0.6689  0.7950  11.00000  0.05    0.72
Q8    1   0.0418  0.7757  0.5723  11.00000  0.05    0.71
Q9    1   0.9454  0.7361  0.6242  11.00000  0.05    0.71
Q10   1   0.4823  0.6882  0.9459  11.00000  0.05    0.69
Q11   1   0.4973  0.6984  0.7397  11.00000  0.05    0.69
Q12   1   0.5054  0.7435  0.6178  11.00000  0.05    0.68
Q13   1   0.7274  0.6737  0.6376  11.00000  0.05    0.68
Q14   1   0.4172  0.5660  0.6871  11.00000  0.05    0.67
Q15   1   0.3559  0.4801  1.0956  11.00000  0.05    0.66
Q16   1   0.8248  0.6255  0.8369  11.00000  0.05    0.59
Q17   1   0.6782  0.7296  0.7778  11.00000  0.05    0.58
Q18   1   0.4856  0.6250  0.7192  11.00000  0.05    0.58
Q19   1   0.5161  0.6569  0.8010  11.00000  0.05    0.58
Q20   1   0.7421  0.6401  0.8324  11.00000  0.05    0.58
;
_shelx_res_checksum   69201

_shelx_hkl_file
;
   2   0   0  121.71    6.52
   2   0   0  122.77    5.99
   3   0   0    1.56    3.66
   3   0   0   -0.97    4.03
   4   0   0 2452.48   53.25
   4   0   0 2443.47   49.98
   5   0   0   -3.15    4.91
   6   0   0   13.28    8.01
   7   0   0   -4.71    7.16
   8   0   0  453.88   25.31
   9   0   0  -10.09    8.66
  10   0   0   25.50   13.34
  11   0   0  -10.51   10.66
  12   0   0  481.33   32.52
  13   0   0    9.48   15.25
  14   0   0   49.07   20.44
  15   0   0    0.65   16.69
  16   0   0   39.93   21.02
  17   0   0  -12.91   15.89
  18   0   0   98.68   29.39
  18  -1   0   31.09   23.72
  17  -1   0  -12.28   20.06
  16  -1   0   47.67   23.55
  15  -1   0   54.04   20.93
  14  -1   0  117.09   24.85
  13  -1   0  -10.06   14.28
  12  -1   0    5.23   13.25
  11  -1   0   92.28   20.38
  10  -1   0  298.27   23.44
   9  -1   0  289.88   21.68
   8  -1   0 1024.95   38.32
   7  -1   0    7.59    8.72
   6  -1   0 1486.09   42.24
   5  -1   0   14.13    6.78
   4  -1   0 2509.39   54.14
   3  -1   0  580.09   18.30
   2  -1   0  537.65   14.75
   2   1   0  517.77   14.79
   3   1   0  569.61   16.21
   3   1   0  585.06   18.67
   4   1   0 2482.31   53.46
   4   1   0 2391.61   49.08
   5   1   0   14.02    6.10
   5   1   0   14.08    6.45
   6   1   0 1456.36   42.09
   7   1   0   -2.77    7.53
  -8  -1   0 1014.48   30.39
   8   1   0 1021.31   38.40
   9   1   0  313.00   22.48
  -9  -1   0  269.68   16.05
  10   1   0  341.95   24.79
  11   1   0   60.41   18.33
  12   1   0   10.51   14.93
  13   1   0   -3.41   14.04
  14   1   0  136.00   26.06
  15   1   0   66.05   24.09
  16   1   0   46.97   23.36
  17   1   0    0.13   20.30
  18   1   0    2.92   22.64
  18  -2   0    1.75   21.67
  17  -2   0   -3.50   17.48
  16  -2   0   55.87   24.64
  15  -2   0   -3.68   17.32
  14  -2   0   79.73   22.40
  13  -2   0   -3.26   14.24
  12  -2   0   90.49   19.88
  11  -2   0  157.49   23.98
  10  -2   0   38.81   14.78
   9  -2   0  133.18   18.41
   8  -2   0   75.80   14.86
   7  -2   0  816.89   31.55
   6  -2   0  222.50   15.32
   5  -2   0 1325.31   36.59
   4  -2   0 1179.01   31.53
   3  -2   0 3454.72   66.13
   2  -2   0  469.96   13.59
   2   2   0  474.79   14.26
   3   2   0 3475.47   66.33
   3   2   0 3366.02   60.93
  -3  -2   0 3365.38   62.56
   4   2   0 1168.39   28.02
   4   2   0 1138.84   31.63
  -4  -2   0 1147.34   26.43
   5   2   0 1319.04   32.96
  -5  -2   0 1321.07   30.58
   5   2   0 1265.09   36.59
   6   2   0  238.23   16.21
  -6  -2   0  218.34   11.52
   6   2   0  236.61   13.97
   7   2   0  789.38   31.64
  -7  -2   0  848.02   25.17
   8   2   0   63.85   14.44
  -8  -2   0   78.98   11.12
   9   2   0  126.80   18.21
  -9  -2   0  107.21   11.14
  10   2   0   35.56   14.02
  11   2   0  128.64   22.11
  12   2   0   86.82   21.78
  13   2   0    4.40   14.86
  14   2   0   78.87   21.27
  15   2   0   17.83   16.78
  16   2   0   43.25   20.61
  17   2   0   -7.45   18.47
  18   2   0   -4.02   19.32
  18  -3   0   -9.44   18.64
  17  -3   0   -7.15   19.42
  16  -3   0   18.58   18.55
  15  -3   0  286.43   30.70
  14  -3   0   15.24   16.16
  13  -3   0  235.67   25.61
  12  -3   0  107.15   21.80
  11  -3   0  182.31   23.84
  10  -3   0    5.69   10.82
   9  -3   0  159.08   15.95
   8  -3   0   10.60   10.41
   7  -3   0   53.29   11.61
   6  -3   0   -6.59    4.42
   5  -3   0  197.59   13.12
   4  -3   0  513.31   19.12
   3  -3   0  824.95   22.79
  -2   3   0   99.08    6.03
   1   3   0 3785.15   67.34
   2   3   0  100.43    6.27
  -3  -3   0  794.60   19.10
   3   3   0  838.31   23.60
   3   3   0  802.76   19.40
   4   3   0  476.60   18.98
  -4  -3   0  503.65   14.93
   4   3   0  515.89   16.28
   5   3   0  214.93   14.16
  -5  -3   0  197.37    9.79
   5   3   0  200.52   11.53
   6   3   0   -6.19    5.99
   6   3   0   -0.15    5.43
  -6  -3   0   -9.23    3.87
   7   3   0   42.87   11.41
  -7  -3   0   33.70    8.25
   7   3   0   35.68    8.94
  -8  -3   0   -4.92    6.29
   8   3   0    9.41    9.83
   9   3   0  176.27   18.34
  -9  -3   0  155.82   12.20
  10   3   0  -10.70    7.89
  11   3   0  213.04   26.90
  12   3   0   90.93   21.60
  13   3   0  212.20   28.69
  14   3   0    5.79   15.30
  15   3   0  315.73   31.30
  16   3   0    0.70   20.28
  17   3   0   17.62   22.43
  18   3   0  -10.60   20.69
  17  -4   0   12.11   18.46
  16  -4   0   27.71   21.85
  15  -4   0    6.18   16.23
  14  -4   0  228.73   31.67
  13  -4   0  186.02   27.65
  12  -4   0  199.10   26.93
  11  -4   0  658.87   36.02
  10  -4   0   12.98   12.34
   9  -4   0  208.17   18.73
   8  -4   0  497.09   26.40
   7  -4   0 1472.38   44.68
   6  -4   0    4.16    6.94
   5  -4   0   89.76    9.73
   4  -4   0  243.19   13.06
  -2   4   0  866.92   21.12
  -1   4   0  403.39   11.22
  -1  -4   0  383.86   10.68
   1   4   0  386.22   11.47
   2   4   0  879.94   22.40
  -2  -4   0  856.46   19.73
   3   4   0  112.46    8.95
  -3  -4   0  114.06    6.38
   3   4   0  115.84    6.40
  -4  -4   0  240.51    9.87
   4   4   0  220.47   12.99
   4   4   0  232.29   10.52
  -5  -4   0   79.28    6.64
   5   4   0   79.61   11.01
   5   4   0   71.30    7.59
   6   4   0    4.08    6.05
   6   4   0   -2.44    5.25
  -6  -4   0    1.02    4.64
   7   4   0 1303.65   42.84
  -7  -4   0 1331.83   33.56
   7   4   0 1375.48   37.94
  -8  -4   0  435.93   18.26
   8   4   0  461.72   25.11
   9   4   0  192.36   17.70
  -9  -4   0  216.49   13.19
  10   4   0   35.76   14.46
  11   4   0  624.60   35.74
  12   4   0  184.62   27.08
  13   4   0  191.86   28.28
  14   4   0  180.78   29.16
  15   4   0   37.87   20.17
  16   4   0   15.31   17.99
  17   4   0    3.80   19.92
  18   4   0   37.94   25.60
  16  -5   0   80.07   23.96
  15  -5   0   80.44   23.08
  14  -5   0   39.35   19.28
  13  -5   0   36.39   18.55
  12  -5   0  197.23   26.90
  11  -5   0  153.29   23.37
  10  -5   0  791.20   37.02
   9  -5   0   76.01   15.58
   8  -5   0 1745.23   52.27
   7  -5   0  741.30   30.07
   6  -5   0  948.77   32.30
   5  -5   0  110.46   10.66
  -3   5   0  322.16   13.29
  -2   5   0  991.02   23.71
  -1   5   0   14.33    3.32
   1   5   0   10.52    3.21
  -1  -5   0    5.22    2.48
  -2  -5   0  997.15   22.77
   2   5   0  982.83   25.06
  -3  -5   0  314.88   11.03
   3   5   0  319.79   14.31
   3   5   0  304.49   10.32
   4   5   0  969.12   23.66
  -4  -5   0  929.86   23.26
   4   5   0  956.75   28.79
   5   5   0  107.84    8.50
  -5  -5   0  108.95    7.47
   5   5   0  117.87   11.28
  -6  -5   0  903.58   24.77
   6   5   0  913.42   32.59
   6   5   0  911.75   27.35
   7   5   0  729.38   26.07
  -7  -5   0  701.92   22.26
   7   5   0  706.97   30.56
   8   5   0 1596.80   44.20
   8   5   0 1595.01   51.03
  -8  -5   0 1606.45   39.34
  -9  -5   0   84.18   10.83
   9   5   0   51.33   14.22
  10   5   0  777.25   37.68
  11   5   0  163.07   24.42
  12   5   0  219.36   24.48
  13   5   0   41.93   19.19
  14   5   0   44.23   19.13
  15   5   0  161.32   29.51
  16   5   0  107.46   27.46
  17   5   0  129.35   29.58
  18   5   0    0.03   21.70
 -17   6   0  138.42  179.25
  15  -6   0   41.56   21.26
  14  -6   0  393.60   32.78
  13  -6   0   48.69   18.85
  12  -6   0  491.58   32.68
  11  -6   0  142.24   22.48
  10  -6   0   68.72   16.92
   9  -6   0   52.87   14.02
   8  -6   0  105.26   15.95
   7  -6   0   -1.91    7.69
   6  -6   0  740.42   27.86
  -5   6   0   30.15    8.12
  -4   6   0  261.22   13.49
  -3   6   0   13.54    5.03
  -2   6   0 5760.12  101.56
  -1   6   0  552.43   15.57
   0   6   0  901.24   20.98
   1   6   0  561.17   16.15
   2   6   0 5598.84  100.35
   2   6   0 5528.90   92.64
  -2  -6   0 5539.31   99.22
   3   6   0   11.93    5.43
  -3  -6   0   27.36    4.76
   3   6   0   26.07    4.26
   4   6   0  242.62   14.08
   4   6   0  248.79   10.43
  -4  -6   0  260.53   10.78
   5   6   0   30.32    8.30
  -5  -6   0   37.40    6.22
   5   6   0   34.84    6.52
   6   6   0  711.48   23.31
   6   6   0  661.97   27.75
  -6  -6   0  698.04   21.07
   7   6   0   -1.59    6.38
   7   6   0    2.07    8.24
  -7  -6   0    5.31    5.79
   8   6   0  103.27   13.74
  -8  -6   0   88.27   10.87
   8   6   0   78.59   15.29
  -9  -6   0   54.46    8.97
   9   6   0   33.62   13.25
  10   6   0   75.19   17.45
  11   6   0   90.92   20.54
  12   6   0  424.04   31.50
  13   6   0   96.44   23.09
  14   6   0  370.90   32.36
  15   6   0   63.88   23.32
  16   6   0  257.21   35.47
  17   6   0   13.18   22.00
  18   6   0   58.39   26.87
 -17   7   0   53.52  134.12
 -16   7   0   75.57   76.46
 -15   7   0  590.64   87.60
  13  -7   0  194.96   28.07
  12  -7   0  370.37   28.34
  11  -7   0  196.65   22.08
  10  -7   0  273.55   23.33
   9  -7   0   -2.08    9.93
   8  -7   0  213.86   18.15
  -6   7   0 1134.63   35.78
  -5   7   0  288.09   15.88
  -4   7   0    3.47    4.74
  -3   7   0  117.86    8.62
  -2   7   0 1907.06   40.44
  -1   7   0   48.92    5.57
   1   7   0   40.30    4.07
   1   7   0   45.44    5.07
  -2  -7   0 1792.74   38.07
   2   7   0 1780.71   40.16
   2   7   0 1806.95   33.81
   3   7   0  109.80    9.41
   3   7   0  116.48    6.41
  -3  -7   0  116.44    7.56
   4   7   0    5.89    3.70
  -4  -7   0    6.87    3.93
   4   7   0    1.88    5.02
   5   7   0  286.51   12.74
  -5  -7   0  293.52   12.70
   5   7   0  294.96   17.29
  -6  -7   0 1054.07   28.37
   6   7   0 1117.27   30.31
   6   7   0 1111.70   37.18
   7   7   0    7.17    7.49
  -7  -7   0   15.81    6.92
   7   7   0   28.22   10.14
   8   7   0  189.60   14.79
  -8  -7   0  164.29   11.76
   8   7   0  197.23   18.49
   9   7   0   -7.43    7.94
  -9  -7   0   10.97    6.72
   9   7   0    3.99    8.38
  10   7   0  268.22   23.39
  11   7   0  184.02   25.61
  12   7   0  311.86   28.47
  13   7   0  203.27   28.27
  14   7   0  105.80   25.12
  15   7   0  207.72   32.95
  16   7   0   17.63   20.93
  17   7   0   37.20   22.59
  18   7   0   -1.48   22.71
 -17   8   0  -68.59   96.19
 -16   8   0  163.31   67.98
 -15   8   0   28.95   43.38
 -14   8   0  -13.44   32.55
 -13   8   0   39.82   29.39
 -12   8   0   66.65   23.88
  -9   8   0  167.49   21.76
  -8   8   0   95.39   16.23
  -7   8   0 1097.74   37.61
  -6   8   0   25.18    9.08
  -5   8   0 1198.58   34.76
  -4   8   0  118.46    9.87
  -3   8   0  415.38   16.27
  -2   8   0    5.69    4.43
  -1   8   0 6105.06  107.80
   0   8   0  352.32   13.00
   1   8   0 6033.10  108.60
   1   8   0 6219.95  102.15
   2   8   0    2.65    3.06
  -2  -8   0    1.41    3.66
   2   8   0    8.73    4.91
  -3  -8   0  378.65   13.90
   3   8   0  380.15   16.77
   3   8   0  360.95   11.54
  -4  -8   0  113.50    7.98
   4   8   0  103.52   10.38
   4   8   0  113.28    7.22
   5   8   0 1170.95   36.73
  -5  -8   0 1153.25   29.50
   5   8   0 1151.42   28.66
  -6  -8   0   10.11    5.86
   6   8   0    9.37    6.21
   6   8   0   16.56    8.89
   7   8   0 1053.30   31.43
  -7  -8   0 1002.24   28.76
   7   8   0 1065.02   38.79
   8   8   0  100.89   13.63
   8   8   0   70.73   15.21
  -8  -8   0   99.46   11.13
  -9  -8   0  126.51   10.86
   9   8   0  117.47   19.20
   9   8   0  132.63   13.84
  10   8   0   38.69   15.13
  11   8   0  989.45   46.00
  12   8   0   39.27   18.53
  13   8   0   53.79   20.61
  14   8   0   16.03   18.29
  15   8   0   20.11   19.34
  16   8   0   53.51   24.51
  17   8   0    7.00   19.31
 -17   9   0  396.31  100.45
 -16   9   0  207.97   60.66
 -15   9   0  410.73   61.23
 -14   9   0  -36.89   27.70
 -13   9   0  303.47   43.00
 -12   9   0   58.95   23.92
 -11   9   0  414.86   32.75
 -10   9   0   76.75   19.32
  -9   9   0   68.28   15.10
  -8   9   0  154.22   19.31
  -7   9   0   -3.08    7.98
  -6   9   0   14.55    8.08
  -5   9   0  107.69   11.01
  -4   9   0   92.66    9.14
  -3   9   0 3572.38   70.77
  -2   9   0   33.51    6.46
  -1   9   0   13.12    4.99
   1   9   0   11.21    3.87
   1   9   0   24.66    5.72
   2   9   0   29.51    5.85
   2   9   0   30.66    4.89
  -3  -9   0 3288.94   64.64
   3   9   0 3150.29   67.97
   3   9   0 3308.70   58.61
   4   9   0   83.15   11.42
  -4  -9   0   83.63    7.69
   4   9   0   87.34    6.64
   5   9   0   94.00    7.90
   5   9   0   76.29   12.26
  -5  -9   0  107.36    8.59
   6   9   0   10.31    8.29
   6   9   0   10.20    5.97
  -6  -9   0   10.92    6.15
  -7  -9   0   -7.02    5.77
   7   9   0    3.12    6.65
   7   9   0    2.18    8.16
   8   9   0  127.32   12.30
  -8  -9   0  122.53   10.59
   8   9   0   92.71   17.06
  -9  -9   0   75.76   10.72
   9   9   0   56.29   15.42
   9   9   0   54.51   12.05
  10   9   0   71.40   14.04
  10   9   0   44.97   16.16
  11   9   0  368.77   29.25
  12   9   0   28.47   16.46
  13   9   0  224.24   30.92
  14   9   0    9.29   17.87
  15   9   0  206.11   33.09
  16   9   0   83.21   25.18
  17   9   0  105.28   29.92
 -17  10   0  -15.65   68.85
 -16  10   0  255.12   65.13
 -15  10   0   80.69   39.66
 -14  10   0   78.73   35.95
 -13  10   0  145.22   33.73
 -12  10   0  276.57   35.68
 -11  10   0  117.79   24.70
 -10  10   0  124.78   23.05
  -9  10   0  541.12   29.48
  -8  10   0  106.43   16.77
  -7  10   0  504.86   25.19
  -6  10   0  359.76   19.87
  -5  10   0  901.39   30.08
  -4  10   0  138.34   11.28
  -3  10   0 1032.44   29.10
  -2  10   0  338.81   14.66
  -1  10   0  828.67   23.55
   0  10   0 1954.75   42.54
   1  10   0  829.27   20.41
   1  10   0  840.63   24.18
   2  10   0  297.38   14.55
   2  10   0  315.28   11.07
   3  10   0  958.57   22.56
   3  10   0  924.46   29.32
  -3 -10   0  948.58   26.35
   4  10   0  135.48    8.13
   4  10   0  133.02   12.10
   5  10   0  876.74   23.98
   5  10   0  921.96   32.80
  -5 -10   0  871.98   25.74
   6  10   0  322.62   14.91
  -6 -10   0  313.99   15.01
   6  10   0  335.74   20.91
   7  10   0  442.32   19.16
  -7 -10   0  444.94   18.27
   7  10   0  450.26   25.39
   8  10   0   87.06   16.57
   8  10   0   95.53   12.81
  -8 -10   0   97.24   10.18
   9  10   0  459.52   28.79
   9  10   0  475.22   23.23
  -9 -10   0  471.59   19.95
  10  10   0   69.93   14.80
  10  10   0   88.52   19.31
  11  10   0   82.81   20.30
  12  10   0  145.28   26.53
  13  10   0   78.93   22.61
  14  10   0   62.54   22.77
  15  10   0   44.25   22.06
  16  10   0   88.62   26.77
  17  10   0  -12.12   21.37
 -17  11   0  -45.34   57.43
 -16  11   0   72.24   48.93
 -15  11   0   24.40   34.28
 -14  11   0   -7.81   26.33
 -13  11   0   44.24   25.08
 -12  11   0  349.85   32.37
 -11  11   0   38.57   18.05
 -10  11   0  332.65   26.42
  -9  11   0   10.40   11.28
  -8  11   0  648.91   30.34
  -7  11   0  213.86   17.46
  -6  11   0 1300.06   40.06
  -5  11   0  118.75   11.89
  -4  11   0  799.13   26.62
  -3  11   0   59.17    8.88
  -2  11   0  648.56   21.56
  -1  11   0  655.64   21.10
   1  11   0  673.26   18.60
   1  11   0  708.34   22.38
   2  11   0  606.86   16.79
   2  11   0  589.52   21.56
   3  11   0   43.46    8.78
   3  11   0   54.71    6.74
   4  11   0  693.93   19.99
   4  11   0  735.82   28.03
  -4 -11   0  863.89   24.91
   5  11   0   91.04    8.16
  -5 -11   0  105.11    9.33
   5  11   0   84.05   13.53
  -6 -11   0 1185.85   32.64
   6  11   0 1209.66   41.22
   6  11   0 1194.98   31.30
   7  11   0  194.69   13.32
  -7 -11   0  193.03   12.73
   7  11   0  212.76   18.74
   8  11   0  557.68   30.29
   8  11   0  534.18   22.71
  -8 -11   0  546.00   21.27
   9  11   0   -7.32    9.50
   9  11   0    8.50    8.77
  10  11   0  314.40   25.88
  11  11   0   38.26   17.67
  12  11   0  269.77   27.42
  13  11   0    6.96   15.80
  14  11   0    1.02   15.37
  15  11   0   18.80   19.01
  16  11   0   -4.76   20.39
  17  11   0    1.84   22.32
 -17  12   0  -41.14   40.85
 -16  12   0  114.04   45.09
 -15  12   0    8.85   33.65
 -14  12   0  130.48   35.91
 -13  12   0   14.06   19.96
 -12  12   0   92.59   22.35
 -11  12   0  139.19   25.93
 -10  12   0  228.40   26.81
  -9  12   0   25.95   12.98
  -8  12   0    8.33    9.72
  -7  12   0   43.38   12.18
  -6  12   0    6.02    8.62
  -5  12   0  216.80   15.09
  -4  12   0 1187.25   34.82
  -3  12   0  138.12   10.96
  -2  12   0   97.49    9.02
  -1  12   0 2352.39   51.32
   0  12   0  550.87   17.98
   0  12   0  575.67   20.00
   1  12   0 2292.24   45.61
   1  12   0 2305.68   51.13
   2  12   0   94.00    7.22
   2  12   0   79.55    8.27
   3  12   0  117.75   11.40
   3  12   0  129.23    8.07
   4  12   0 1028.50   34.45
  -4 -12   0 1054.75   29.89
   4  12   0 1024.61   25.47
   5  12   0  187.11   10.61
   5  12   0  177.66   15.77
  -5 -12   0  185.93   12.10
   6  12   0   12.17    7.75
   6  12   0    5.76    6.27
  -6 -12   0    6.65    7.17
  -7 -12   0   46.42    9.73
   7  12   0   17.34   11.68
   7  12   0   63.19   10.03
  -8 -12   0   -3.44    6.17
   8  12   0   15.47    8.05
   8  12   0   10.76   10.38
   9  12   0   19.21    9.81
   9  12   0   21.31   12.85
  10  12   0  162.12   24.00
  11  12   0  126.27   24.03
  12  12   0   36.57   19.65
  13  12   0   -5.59   16.61
  14  12   0  108.77   26.42
  15  12   0  -16.34   18.00
  16  12   0   15.32   21.85
  17  12   0  -12.95   18.94
 -17  13   0  -10.12   52.26
 -16  13   0   69.87   39.28
 -15  13   0  169.56   43.32
 -14  13   0   47.53   27.16
 -13  13   0    8.79   20.01
 -12  13   0   39.03   19.78
 -11  13   0   26.53   18.26
 -10  13   0   54.82   19.00
  -9  13   0  126.44   18.00
  -8  13   0  123.25   16.99
  -7  13   0   18.90   10.87
  -6  13   0  608.45   26.78
  -5  13   0    0.81    7.08
  -4  13   0 1988.67   49.36
  -3  13   0  511.54   21.24
  -2  13   0   59.24    8.84
  -1  13   0   46.13    8.27
   0  13   0    5.49    4.89
   0  13   0    9.79    5.22
   2  13   0   68.80   10.19
   2  13   0   68.18    7.71
   3  13   0  431.25   20.70
   3  13   0  440.93   15.06
   4  13   0 1720.13   48.21
   4  13   0 1798.82   38.31
   5  13   0    5.60    5.06
  -5 -13   0    4.56    5.40
   5  13   0   -7.46    7.21
   6  13   0  553.13   28.12
  -6 -13   0  564.71   21.76
   6  13   0  548.39   19.75
   7  13   0   16.13   10.67
  -7 -13   0   24.71    8.31
   7  13   0   11.51    7.16
   8  13   0  105.95   18.22
   8  13   0  115.69   11.75
  -8 -13   0  107.66   11.21
   9  13   0  110.38   19.86
  10  13   0   38.13   16.63
  11  13   0   13.67   16.56
  12  13   0   26.11   17.50
  13  13   0   11.93   17.41
  14  13   0   23.22   20.72
  15  13   0   56.01   25.20
  16  13   0   36.18   23.76
  17  13   0  -21.50   21.68
 -17  14   0  -69.32   40.72
 -16  14   0  -32.06   31.98
 -15  14   0   64.27   34.39
 -14  14   0   41.84   23.56
 -13  14   0   34.69   22.82
 -12  14   0   -5.04   15.87
 -11  14   0   21.98   18.09
 -10  14   0  -13.08   14.55
  -9  14   0  425.92   26.73
  -8  14   0   34.50   12.62
  -7  14   0  138.21   15.35
  -6  14   0  152.10   14.95
  -5  14   0  458.36   22.34
  -4  14   0    8.81    7.17
  -3  14   0 1851.64   46.64
  -2  14   0  328.49   16.53
  -1  14   0   -1.91    4.93
   0  14   0  616.48   20.74
   0  14   0  635.99   22.66
   1  14   0    7.31    5.10
   1  14   0   42.77    8.75
   2  14   0  312.96   17.26
   2  14   0  326.81   13.17
   3  14   0 1716.04   37.14
   3  14   0 1654.08   45.94
   4  14   0    3.01    7.90
   4  14   0   13.30    5.68
   5  14   0  394.16   22.58
   5  14   0  377.59   15.33
  -5 -14   0  407.52   18.47
   6  14   0  134.06   10.48
  -6 -14   0  150.81   12.30
   6  14   0  143.38   16.20
   7  14   0  125.35   11.05
  -7 -14   0  128.10   11.65
   7  14   0  130.01   19.59
  -8 -14   0   40.06   10.09
   8  14   0   24.06    8.63
   8  14   0   27.12   13.40
   9  14   0  374.86   27.48
  10  14   0   14.93   13.84
  11  14   0   16.63   15.97
  12  14   0    5.54   16.63
  13  14   0   41.16   20.01
  14  14   0   50.90   21.60
  15  14   0   15.39   20.51
  16  14   0   18.33   20.73
  17  14   0    1.07   24.43
 -17  15   0  179.93   50.84
 -16  15   0   20.66   36.07
 -15  15   0   -0.14   23.36
 -14  15   0   -9.07   19.83
 -13  15   0  321.22   38.43
 -12  15   0    1.63   17.06
 -11  15   0   -0.13   15.40
 -10  15   0   27.72   16.97
  -9  15   0   24.73   12.79
  -8  15   0   -2.88    9.83
  -7  15   0  128.73   17.41
  -6  15   0   74.20   13.84
  -5  15   0 1097.44   36.22
  -4  15   0   19.62    8.88
  -3  15   0  298.62   16.95
  -2  15   0  607.21   23.38
  -1  15   0  984.29   30.47
   1  15   0  972.26   26.19
   1  15   0  946.43   30.41
   2  15   0  576.20   18.67
   2  15   0  563.21   23.96
   3  15   0  221.14   16.12
   3  15   0  242.66   12.19
   4  15   0   22.78    6.47
   4  15   0   23.48    9.81
   5  15   0  861.18   24.96
   5  15   0  898.91   35.31
   6  15   0   68.14    9.80
   6  15   0   54.16   13.58
  -6 -15   0   58.88   10.16
   7  15   0  112.30   10.61
  -7 -15   0  118.19   11.51
   7  15   0  124.54   19.24
  -8 -15   0   -9.69    6.65
   8  15   0   -2.81    9.93
   9  15   0   18.17   12.86
  11  15   0   -7.69   14.46
  12  15   0   12.24   18.02
  13  15   0  141.43   28.41
  14  15   0  -19.16   14.59
  15  15   0   -9.03   17.84
  16  15   0    1.82   20.50
  17  15   0   89.29   28.94
 -17  16   0  -12.57   42.03
 -16  16   0    1.39   25.97
 -15  16   0   11.83   24.87
 -14  16   0  113.27   30.48
 -13  16   0  256.93   34.84
 -12  16   0   21.29   17.85
 -11  16   0   95.44   22.60
 -10  16   0    4.89   14.85
  -9  16   0  628.16   32.72
  -8  16   0   72.45   16.23
  -7  16   0   50.45   12.89
  -6  16   0  111.02   15.93
  -5  16   0  168.59   15.10
  -4  16   0  569.61   24.84
  -3  16   0    0.10    7.02
  -2  16   0  288.74   16.61
  -1  16   0 2916.90   64.77
   0  16   0 2065.81   50.62
   0  16   0 2132.74   48.08
   1  16   0 2871.61   57.82
   1  16   0 2814.79   64.28
   2  16   0  285.58   17.53
   2  16   0  288.73   13.52
   3  16   0   -4.31    4.82
   3  16   0   -7.67    6.19
   4  16   0  506.02   18.13
   5  16   0  131.54   10.44
   5  16   0  148.16   15.85
   6  16   0  107.29   11.75
   6  16   0  104.51   17.42
  -7 -16   0   37.84    9.66
   7  16   0   27.84    8.85
   7  16   0    2.62   10.98
   8  16   0   36.32   14.46
  -8 -16   0   58.97   11.50
   9  16   0  531.78   33.10
  10  16   0   -4.83   13.55
  11  16   0   54.00   21.02
  12  16   0   30.10   18.18
  13  16   0  213.28   32.63
  14  16   0   84.13   25.06
  15  16   0   11.49   18.94
  16  16   0    6.91   24.03
 -17  17   0  124.61   50.66
 -16  17   0   73.26   31.41
 -15  17   0  -30.65   22.73
 -14  17   0   62.90   26.70
 -13  17   0   15.90   19.36
 -12  17   0   84.83   23.12
 -11  17   0  -25.01   12.34
 -10  17   0  201.94   22.06
  -9  17   0  153.01   22.32
  -8  17   0  115.58   18.68
  -7  17   0   81.69   15.41
  -6  17   0  320.50   20.86
  -5  17   0   66.07   13.38
  -4  17   0  621.74   26.51
  -3  17   0   24.58    8.88
  -2  17   0   44.15   10.15
  -1  17   0  115.61   11.58
   2  17   0   23.22    9.03
   2  17   0   27.13    7.23
   3  17   0    8.64    6.16
   4  17   0  564.32   27.20
   4  17   0  564.69   19.86
   5  17   0   69.28   14.16
   5  17   0   48.44    9.27
   6  17   0  262.88   21.33
   6  17   0  247.55   13.85
   7  17   0   36.75   13.53
   8  17   0  128.85   21.27
   9  17   0  126.33   22.41
  10  17   0  183.80   27.63
  11  17   0  -15.86   13.15
  12  17   0   97.18   24.17
  13  17   0    9.63   19.31
  14  17   0   54.78   23.83
  15  17   0   -2.52   19.10
  16  17   0   37.89   26.31
 -16  18   0  316.78   50.84
 -15  18   0   18.02   25.79
 -14  18   0  274.91   39.43
 -13  18   0   22.75   20.56
 -12  18   0   30.16   17.85
 -11  18   0   45.95   18.24
 -10  18   0   44.02   17.56
  -9  18   0   26.10   15.29
  -8  18   0  398.65   25.60
  -7  18   0   35.51   12.90
  -6  18   0  890.63   34.88
  -5  18   0  208.95   17.36
  -4  18   0  523.56   24.80
  -3  18   0  210.51   15.68
  -2  18   0  880.94   31.04
  -1  18   0   14.46    8.13
   0  18   0  479.61   20.19
   0  18   0  480.67   21.90
   1  18   0   13.46    6.78
   1  18   0   24.05    9.14
   2  18   0  831.21   25.17
   2  18   0  832.17   31.23
   3  18   0  185.94   15.94
   3  18   0  184.97   11.59
   4  18   0  439.36   23.90
   4  18   0  436.51   17.82
   5  18   0  177.09   12.20
   5  18   0  232.03   19.55
   6  18   0  782.63   36.04
   6  18   0  750.45   24.99
   7  18   0    4.50   10.72
   8  18   0  327.10   25.95
   9  18   0   17.40   14.94
  10  18   0   14.98   14.49
  11  18   0   31.86   17.38
  12  18   0   21.22   18.63
  13  18   0   19.67   21.33
  14  18   0  128.66   30.59
  15  18   0  -10.09   18.13
  16  18   0  202.28   36.75
 -16  19   0   95.24   38.08
 -15  19   0   56.19   30.28
 -14  19   0   28.23   24.74
 -13  19   0  173.26   29.90
 -12  19   0  320.33   29.04
 -11  19   0   73.61   20.08
 -10  19   0  326.76   26.69
  -9  19   0   20.00   15.54
  -8  19   0   82.81   18.06
  -7  19   0   33.78   13.46
  -6  19   0  148.17   18.81
  -5  19   0 1004.94   37.03
  -4  19   0  316.26   19.93
  -3  19   0   34.22   10.76
  -2  19   0   52.79   11.24
  -1  19   0   17.71    8.39
   0  19   0   14.17    7.76
   0  19   0    9.65    6.75
   1  19   0   17.60    8.53
   1  19   0   -0.28    5.57
   2  19   0   61.79   11.57
   2  19   0   39.03    8.03
   3  19   0   38.01   11.14
   3  19   0   28.95    7.92
   4  19   0  260.72   14.11
   4  19   0  277.82   20.42
   5  19   0  860.31   26.62
   5  19   0  814.02   36.05
   6  19   0  129.92   19.51
   7  19   0   17.84   13.20
   8  19   0   74.37   18.72
   9  19   0   22.97   16.21
  10  19   0  255.59   26.42
  11  19   0   35.28   18.54
  12  19   0  290.24   30.33
  13  19   0  135.80   30.70
  14  19   0    5.57   20.51
  15  19   0   28.87   24.54
  16  19   0   40.92   25.87
 -16  20   0   84.36   28.57
 -15  20   0   68.47   29.22
 -14  20   0  -21.88   19.91
 -13  20   0  137.08   25.86
 -12  20   0   30.09   16.96
 -11  20   0  152.33   24.28
 -10  20   0   28.47   16.14
  -9  20   0  912.50   41.25
  -8  20   0   84.11   18.52
  -7  20   0  137.81   18.77
  -6  20   0   21.87   12.22
  -5  20   0    5.96    9.49
  -4  20   0   -2.67    8.87
  -3  20   0    3.78    9.43
  -2  20   0  298.31   18.78
  -1  20   0  103.82   15.02
  -1  20   0  125.75   14.90
   0  20   0   82.04   12.55
   0  20   0   93.86   12.30
   1  20   0  106.44   12.29
   1  20   0  115.81   14.82
   2  20   0  256.68   14.25
   2  20   0  256.92   17.49
   3  20   0   12.76    9.89
   3  20   0   11.28    6.89
   4  20   0   -6.80    5.83
   4  20   0   -9.27    8.29
   5  20   0    4.73    6.69
   5  20   0    2.84    9.34
   6  20   0    6.63   10.69
   7  20   0   88.52   19.23
   8  20   0   61.36   18.31
   9  20   0  819.25   43.36
  10  20   0    3.23   14.92
  11  20   0  109.46   24.74
  12  20   0   21.83   19.82
  13  20   0  131.12   29.68
  14  20   0   -1.87   19.36
  15  20   0   13.57   22.09
  16  20   0   44.91   28.22
 -16  21   0   17.50   26.85
 -15  21   0   85.23   26.85
 -14  21   0    5.73   21.87
 -13  21   0   27.80   18.69
 -12  21   0  -13.35   13.45
 -11  21   0   15.96   16.07
 -10  21   0   96.71   20.18
  -9  21   0    5.07   13.69
  -8  21   0   21.28   14.47
  -7  21   0  111.17   19.00
  -6  21   0   17.39   11.73
  -5  21   0   57.54   14.91
  -4  21   0    2.48    9.66
  -3  21   0  348.87   20.97
  -2  21   0   16.49    9.88
  -1  21   0  303.91   19.29
  -1  21   0  267.57   18.02
   0  21   0   -8.26    6.92
   0  21   0   -3.41    6.02
   1  21   0  294.09   15.94
   1  21   0  245.35   17.68
   2  21   0   14.93    8.76
   2  21   0    2.05    6.23
   3  21   0  306.43   16.27
   3  21   0  294.67   20.98
   4  21   0    3.59    7.26
   4  21   0    8.37   10.04
   5  21   0   51.30   14.83
   6  21   0    4.85   11.20
   7  21   0   71.56   18.33
   8  21   0   15.51   14.14
   9  21   0   41.35   18.00
  10  21   0   63.51   21.37
  11  21   0   -0.36   15.37
  12  21   0   -9.88   17.30
  13  21   0    3.22   20.55
  14  21   0   -5.55   18.83
  15  21   0   77.22   29.69
  16  21   0   14.75   26.85
 -16  22   0  134.68   37.20
 -15  22   0   15.33   24.09
 -14  22   0   48.75   24.21
 -13  22   0  191.82   31.13
 -12  22   0    8.91   17.54
 -11  22   0   94.56   22.40
 -10  22   0   51.96   19.22
  -9  22   0  121.66   22.03
  -8  22   0  278.20   24.69
  -7  22   0  178.98   23.66
  -6  22   0  199.42   19.31
  -5  22   0  175.73   17.10
  -4  22   0  210.70   18.02
  -3  22   0    7.82   10.24
  -2  22   0   82.40   13.79
  -1  22   0   62.25   12.48
  -1  22   0   68.81   12.78
   0  22   0   26.33   10.73
   0  22   0   12.03    8.19
   1  22   0   53.13   10.34
   1  22   0   55.36   12.74
   2  22   0   75.57   11.56
   2  22   0   87.82   14.66
   3  22   0   18.29    7.86
   3  22   0   16.00    9.17
   4  22   0  179.31   18.51
   4  22   0  178.86   13.44
   5  22   0  159.95   21.90
   6  22   0  184.43   23.78
   7  22   0  141.18   19.95
   8  22   0  243.72   24.62
   9  22   0   68.76   21.43
  10  22   0   52.61   18.94
  11  22   0   48.98   20.34
  12  22   0    6.35   17.40
  13  22   0   69.50   26.69
  14  22   0   44.22   25.34
  15  22   0  -11.91   23.25
 -15  23   0  -25.40   22.27
 -14  23   0  -22.37   14.65
 -13  23   0   -6.20   19.38
 -12  23   0  219.71   31.77
 -11  23   0   -8.27   15.31
 -10  23   0  132.35   23.57
  -9  23   0   84.00   20.61
  -8  23   0   15.67   15.03
  -7  23   0  -18.96   12.77
  -6  23   0  757.53   35.20
  -5  23   0   62.05   15.48
  -4  23   0  125.80   17.81
  -3  23   0  342.34   21.74
  -2  23   0  215.54   17.51
  -1  23   0  227.73   17.73
  -1  23   0  230.27   17.21
   0  23   0   -0.55    8.24
   0  23   0   -4.31    7.08
   1  23   0  216.32   17.74
   1  23   0  192.35   14.50
   2  23   0  207.26   14.40
   2  23   0  216.84   18.58
   3  23   0  311.66   17.54
   3  23   0  305.74   22.47
   4  23   0  119.85   19.20
   4  23   0  105.94   11.41
   5  23   0   25.50   13.76
   6  23   0  637.67   35.06
   7  23   0   -0.78   12.42
   8  23   0   17.01   14.89
   9  23   0   79.11   22.01
  10  23   0   89.14   24.10
  11  23   0   -3.11   16.11
  12  23   0  163.86   30.87
  13  23   0  -16.52   19.02
  14  23   0   -0.65   21.59
  15  23   0  -15.76   22.83
 -15  24   0  -20.59   22.87
 -14  24   0   10.00   22.00
 -13  24   0    3.39   19.59
 -12  24   0   -0.13   17.05
 -11  24   0   14.73   17.20
 -10  24   0   14.17   15.38
  -9  24   0   38.74   17.79
  -8  24   0  -11.67   13.33
  -7  24   0  -19.14   12.88
  -6  24   0   -6.87   12.50
  -5  24   0  -12.07    9.33
  -4  24   0  134.42   19.00
  -3  24   0   57.17   14.36
  -2  24   0  892.12   35.01
  -1  24   0   20.38   10.95
  -1  24   0   29.57   11.00
   0  24   0   83.11   15.11
   0  24   0   45.89   11.81
   1  24   0   23.92   12.00
   1  24   0   18.57    8.69
   2  24   0  860.43   29.37
   2  24   0  852.97   36.17
   3  24   0   61.67   11.43
   3  24   0   73.35   16.23
   4  24   0   92.65   15.48
   5  24   0  -12.25    9.81
   6  24   0    8.51   13.26
   7  24   0  -27.90   11.00
   8  24   0   27.82   17.42
   9  24   0   45.51   19.90
  10  24   0  -10.80   16.34
  11  24   0    7.30   18.71
  12  24   0   -7.04   18.44
  13  24   0    8.13   20.10
  14  24   0   -6.01   21.45
  15  24   0  -22.77   19.73
 -15  25   0    3.96   18.81
 -14  25   0   -2.24   22.16
 -13  25   0   -3.29   19.97
 -12  25   0    2.47   17.87
 -11  25   0   12.88   16.50
 -10  25   0   32.56   17.61
  -9  25   0    5.73   15.44
  -8  25   0  295.43   25.65
  -7  25   0    0.93   14.74
  -6  25   0   -8.97   13.63
  -5  25   0  -23.43   10.33
  -4  25   0  188.66   18.60
  -3  25   0  245.61   19.69
  -2  25   0  127.87   18.08
  -2  25   0  144.32   15.70
  -1  25   0   84.20   15.32
  -1  25   0   95.66   16.04
   0  25   0    0.02    9.94
   0  25   0   -7.78    7.68
   1  25   0   91.49   16.61
   1  25   0   76.32   13.65
   2  25   0  150.61   20.13
   2  25   0  129.58   13.34
   3  25   0  217.58   20.61
   3  25   0  233.71   15.75
   4  25   0  163.46   23.02
   5  25   0   -0.73   12.44
   6  25   0   20.73   13.44
   7  25   0    2.19   14.04
   8  25   0  226.57   25.53
   9  25   0    5.70   17.03
  10  25   0  -15.86   17.51
  11  25   0   -0.26   18.01
  12  25   0   18.79   22.22
  13  25   0    8.27   22.67
  14  25   0    8.04   22.05
  15  25   0  -19.62   22.06
 -15  26   0   -4.24   26.01
 -14  26   0   61.50   25.43
 -13  26   0  102.96   26.23
 -12  26   0   38.06   22.23
 -11  26   0   79.51   22.40
 -10  26   0   34.20   18.83
  -9  26   0  198.54   27.10
  -8  26   0   55.76   18.14
  -7  26   0  455.34   29.89
  -6  26   0   83.84   19.55
  -5  26   0   16.60   14.59
  -4  26   0   14.31   12.78
  -3  26   0   44.30   14.69
  -2  26   0   10.22   10.52
  -2  26   0   21.84   11.84
  -1  26   0   37.67   12.94
  -1  26   0   55.70   14.20
   0  26   0  289.97   21.41
   0  26   0  304.15   19.97
   1  26   0   25.44   13.16
   1  26   0   29.82   10.91
   2  26   0    3.00    8.42
   2  26   0   17.25   12.43
   3  26   0   69.93   16.47
   4  26   0   -0.28   11.72
   5  26   0   33.27   15.40
   6  26   0   45.49   17.61
   7  26   0  417.78   32.09
   8  26   0   20.62   17.84
   9  26   0  151.79   28.81
  10  26   0    7.92   18.24
  11  26   0   56.03   24.52
  12  26   0   -7.32   18.80
  13  26   0   71.42   27.25
  14  26   0   52.03   27.46
 -14  27   0   22.12   19.58
 -13  27   0   78.87   23.95
 -12  27   0   51.39   22.59
 -11  27   0    1.69   16.27
 -10  27   0   -5.34   15.97
  -9  27   0   51.38   19.12
  -8  27   0   19.14   16.12
  -7  27   0    1.16   14.66
  -6  27   0  138.22   21.83
  -5  27   0  196.85   24.36
  -4  27   0   -6.22   11.58
  -3  27   0   74.60   16.23
  -2  27   0   28.12   13.32
  -2  27   0   14.50   11.35
  -1  27   0  239.47   20.06
  -1  27   0  242.08   19.53
   0  27   0   14.23   11.82
   0  27   0    4.61   10.01
   1  27   0  211.00   16.70
   1  27   0  212.94   19.83
   2  27   0   -2.38    7.99
   2  27   0    9.32   11.36
   3  27   0   86.48   18.32
   4  27   0   -8.27   11.06
   5  27   0  178.75   22.41
   6  27   0  109.56   23.29
   7  27   0   18.97   15.51
   8  27   0   -7.57   15.57
   9  27   0   52.27   22.54
  10  27   0  -21.76   17.67
  11  27   0  -27.78   17.06
  12  27   0   31.22   23.86
  13  27   0   31.84   23.45
  14  27   0  -10.72   23.23
 -14  28   0   11.36   21.16
 -13  28   0   29.18   20.83
 -12  28   0    8.15   18.24
 -11  28   0   70.07   23.04
 -10  28   0   15.41   18.51
  -9  28   0  230.55   25.43
  -8  28   0   14.65   15.17
  -7  28   0  158.46   24.77
  -6  28   0   -9.96   13.48
  -5  28   0   33.25   16.04
  -4  28   0  -12.27   12.29
  -3  28   0  152.05   21.10
  -3  28   0  157.47   22.05
  -2  28   0  221.42   20.23
  -2  28   0  243.50   20.91
  -1  28   0   16.75   12.13
  -1  28   0    8.71   11.30
   0  28   0   -2.41   10.40
   0  28   0   13.86   12.69
   1  28   0    1.90   12.05
   1  28   0    6.83    9.37
   2  28   0  186.40   20.22
   3  28   0  143.36   21.62
   4  28   0   -5.42   12.43
   5  28   0   38.03   16.43
   6  28   0   -7.23   13.21
   7  28   0   64.65   20.97
   8  28   0  -11.81   16.78
   9  28   0  164.35   30.46
  10  28   0   17.44   19.57
  11  28   0   72.73   23.62
  12  28   0    6.31   20.33
  13  28   0    3.85   23.84
  14  28   0   -6.52   26.15
 -14  29   0   75.65   28.41
 -13  29   0   47.19   24.89
 -12  29   0   51.01   21.56
 -11  29   0    4.41   19.23
 -10  29   0  142.42   27.26
  -9  29   0   19.56   16.60
  -8  29   0  262.62   25.96
  -7  29   0  207.99   27.12
  -6  29   0  126.38   22.53
  -5  29   0   46.65   17.74
  -4  29   0  115.57   20.82
  -3  29   0    9.50   13.54
  -3  29   0    0.82   12.48
  -2  29   0   -3.38   11.18
  -2  29   0    0.85   12.18
  -1  29   0   -8.19   11.78
  -1  29   0   -5.11   10.20
   0  29   0   -6.08   11.29
   0  29   0   -3.45   10.14
   1  29   0   -9.64   11.34
   1  29   0   -9.69    9.30
   2  29   0    1.47   12.55
   3  29   0    6.37   12.93
   4  29   0   83.05   20.33
   5  29   0   31.62   17.86
   6  29   0   98.39   23.44
   7  29   0   98.48   25.19
   8  29   0  199.54   33.60
   9  29   0   -0.46   18.46
  10  29   0   95.92   28.55
  11  29   0   -8.87   20.67
  12  29   0   26.64   23.15
  13  29   0   15.90   22.22
  14  29   0   25.10   28.54
 -13  30   0   13.97   22.00
 -12  30   0   53.26   23.68
 -11  30   0   -4.02   18.09
 -10  30   0   26.65   19.86
  -9  30   0    9.42   18.74
  -8  30   0   18.50   17.15
  -7  30   0    6.26   16.12
  -6  30   0  250.46   24.73
  -5  30   0   -8.11   12.47
  -4  30   0  179.35   20.39
  -3  30   0  -24.98    9.83
  -3  30   0   -4.61   11.18
  -2  30   0   35.07   15.67
  -2  30   0   34.20   14.28
  -1  30   0    0.59   11.38
  -1  30   0  -11.81    9.45
   0  30   0  320.70   22.65
   0  30   0  333.66   25.30
   1  30   0    4.68   13.37
   2  30   0    8.22   15.83
   3  30   0  -14.09   12.16
   4  30   0  178.80   26.40
   5  30   0   12.90   16.70
   6  30   0  161.17   28.19
   7  30   0  -15.40   14.63
   8  30   0   11.87   19.54
   9  30   0   -3.64   17.42
  10  30   0   17.48   20.81
  11  30   0  -12.37   17.42
  12  30   0   37.47   24.41
  13  30   0  -18.32   22.08
 -13  31   0   41.12   21.61
 -12  31   0   20.90   22.17
 -11  31   0   16.14   19.90
 -10  31   0  159.41   27.39
  -9  31   0  -22.69   15.90
  -8  31   0  158.80   27.22
  -7  31   0   -0.97   14.27
  -6  31   0   -0.17   15.36
  -5  31   0  103.25   21.39
  -4  31   0  183.51   24.64
  -4  31   0  222.43   28.42
  -3  31   0  -16.10   12.18
  -3  31   0   -8.10   13.71
  -2  31   0   -5.29   12.40
  -2  31   0  -12.21   10.96
  -1  31   0  177.22   23.78
  -1  31   0  136.70   20.31
   0  31   0   34.24   16.36
   0  31   0   19.04   12.83
   1  31   0  143.73   23.28
   2  31   0   -5.76   13.67
   3  31   0   -9.17   13.58
   4  31   0  154.98   26.07
   5  31   0   84.75   22.77
   6  31   0  -17.40   14.69
   7  31   0  -14.55   14.34
   8  31   0  105.74   27.96
   9  31   0   -2.03   19.30
  10  31   0   99.19   29.08
  11  31   0  -30.78   19.86
  12  31   0   15.99   23.74
  13  31   0   16.42   27.48
 -13  32   0   19.15   24.16
 -12  32   0   22.59   21.11
 -11  32   0  138.41   28.13
 -10  32   0   -9.26   17.99
  -9  32   0  259.74   32.51
  -8  32   0   12.91   18.20
  -7  32   0   50.07   20.43
  -6  32   0   -0.29   15.13
  -5  32   0  137.24   23.55
  -4  32   0   49.93   18.34
  -4  32   0   43.42   16.51
  -3  32   0   15.70   14.51
  -3  32   0   22.93   15.74
  -2  32   0   55.14   18.79
  -2  32   0   75.83   18.51
  -1  32   0   10.40   13.26
  -1  32   0   -0.16   11.38
   0  32   0   27.27   15.34
   0  32   0   27.02   14.09
   1  32   0   -1.05   13.40
   2  32   0   71.68   20.13
   3  32   0    7.22   15.54
   4  32   0   57.65   20.50
   5  32   0   95.90   23.67
   6  32   0  -20.94   14.61
   7  32   0   27.15   20.30
   8  32   0  -23.23   16.39
   9  32   0  181.45   33.44
  10  32   0    0.44   21.90
  11  32   0   81.41   29.58
  12  32   0   -1.08   25.68
  13  32   0   30.82   28.61
 -12  33   0   -6.19   20.33
 -11  33   0   51.75   23.75
 -10  33   0   20.76   20.83
  -9  33   0    2.71   18.68
  -8  33   0    6.15   17.31
  -7  33   0   92.44   23.19
  -6  33   0   -8.25   16.07
  -5  33   0   38.09   19.19
  -5  33   0   64.40   19.52
  -4  33   0  -18.92   13.75
  -4  33   0   18.98   15.88
  -3  33   0  269.94   24.66
  -3  33   0  226.84   23.41
  -2  33   0   -4.65   12.81
  -2  33   0    8.50   16.03
  -1  33   0  110.13   21.12
  -1  33   0   98.52   18.88
   0  33   0    1.57   14.43
   1  33   0  135.53   24.11
   2  33   0    3.61   15.41
   3  33   0  218.03   24.47
   4  33   0    5.42   14.93
   5  33   0   52.00   20.73
   6  33   0   -8.51   16.36
   7  33   0   53.67   23.94
   8  33   0   -2.15   17.58
   9  33   0   21.57   20.41
  10  33   0    3.19   21.10
  11  33   0   26.97   22.23
  12  33   0   -5.49   23.69
 -12  34   0   27.36   25.22
 -11  34   0  252.13   34.04
 -10  34   0  -10.14   17.63
  -9  34   0   12.23   19.63
  -8  34   0   -8.72   17.48
  -7  34   0  162.66   26.94
  -6  34   0   62.52   20.93
  -5  34   0  203.97   27.81
  -5  34   0  200.43   29.17
  -4  34   0   22.82   17.39
  -4  34   0   43.51   18.55
  -3  34   0   62.28   19.31
  -3  34   0   25.35   17.21
  -2  34   0   -0.80   15.28
  -2  34   0  -15.27   12.48
  -1  34   0  163.49   25.26
  -1  34   0  148.52   21.84
   0  34   0   -4.55   13.93
   1  34   0  165.42   26.88
   2  34   0   -4.08   14.39
   3  34   0   43.82   19.24
   4  34   0   51.13   20.79
   5  34   0  172.29   29.32
   6  34   0   46.26   21.05
   7  34   0  112.23   27.88
   8  34   0    8.74   20.40
   9  34   0   -1.79   18.40
  10  34   0   26.60   22.90
  11  34   0  127.01   32.89
  12  34   0   11.37   27.21
 -11  35   0   86.07   26.70
 -10  35   0   86.78   26.39
  -9  35   0    8.86   18.34
  -8  35   0  133.46   27.75
  -7  35   0   13.43   19.16
  -6  35   0   15.62   18.60
  -6  35   0   36.35   18.87
  -5  35   0   68.80   21.65
  -5  35   0   39.02   18.78
  -4  35   0  104.00   22.82
  -4  35   0  110.36   24.48
  -3  35   0  219.72   23.64
  -3  35   0  204.86   28.33
  -2  35   0  -17.77   13.44
  -2  35   0   -3.85   14.14
  -1  35   0  119.22   23.29
   0  35   0  -13.68   15.23
   1  35   0   92.72   23.10
   2  35   0   15.23   16.80
   3  35   0  194.69   29.92
   4  35   0   55.66   22.68
   5  35   0   50.85   20.71
   6  35   0   11.58   19.62
   7  35   0   15.65   21.03
   8  35   0   98.74   28.31
   9  35   0   -3.47   20.39
  10  35   0   -4.86   22.73
  11  35   0   33.82   26.96
 -11  36   0    4.42   22.39
 -10  36   0  -12.73   18.83
  -9  36   0    0.82   19.91
  -8  36   0   12.49   20.04
  -7  36   0    7.18   17.33
  -7  36   0   20.84   18.79
  -6  36   0   12.21   19.54
  -6  36   0   12.14   17.25
  -5  36   0   -1.00   16.25
  -5  36   0    1.41   17.22
  -4  36   0  145.38   26.55
  -4  36   0   86.08   23.54
  -3  36   0   37.02   18.11
  -3  36   0   72.46   22.22
  -2  36   0  229.53   24.55
  -1  36   0    8.14   17.25
   0  36   0  202.68   29.25
   1  36   0   -0.35   16.93
   2  36   0  227.17   31.76
   3  36   0   28.03   19.50
   4  36   0  114.69   26.06
   5  36   0   -4.61   15.81
   6  36   0    0.89   19.40
   7  36   0   -7.61   19.48
   8  36   0    0.73   21.98
   9  36   0    2.95   21.85
  10  36   0  -30.73   21.99
  11  36   0   -6.37   22.69
 -10  37   0    2.92   19.41
  -9  37   0  -44.31   15.46
  -8  37   0   30.11   21.98
  -7  37   0   40.80   21.43
  -7  37   0   24.98   20.34
  -6  37   0  108.56   26.88
  -6  37   0  155.17   27.58
  -5  37   0   24.70   17.74
  -5  37   0   26.96   19.62
  -4  37   0  180.14   28.34
  -4  37   0  144.88   26.94
  -3  37   0  110.40   23.49
  -3  37   0   72.88   22.37
  -2  37   0   96.58   22.57
  -1  37   0   64.60   21.06
   0  37   0   -4.98   17.69
   1  37   0   55.82   20.20
   2  37   0   62.55   21.88
   3  37   0   75.23   24.77
   4  37   0  164.16   31.15
   5  37   0    8.04   20.79
   6  37   0  120.35   29.00
   7  37   0   37.14   24.06
   8  37   0   -6.10   21.59
   9  37   0  -16.31   20.84
  10  37   0  -24.83   23.39
 -10  38   0  -16.86   22.13
  -9  38   0  -22.09   20.39
  -8  38   0    3.28   20.13
  -8  38   0   13.46   19.04
  -7  38   0  111.43   26.88
  -7  38   0  237.61   32.30
  -6  38   0   -2.60   17.15
  -6  38   0   -2.86   16.82
  -5  38   0  167.24   30.11
  -5  38   0  179.05   29.78
  -4  38   0   19.69   17.54
  -4  38   0   33.41   20.46
  -3  38   0   65.89   21.96
  -2  38   0   82.67   22.17
  -1  38   0  153.45   27.09
   0  38   0   72.45   23.86
   1  38   0  188.10   30.44
   2  38   0   42.48   21.77
   3  38   0   65.44   25.52
   4  38   0   52.68   22.67
   5  38   0   83.93   26.99
   6  38   0   -6.04   19.94
   7  38   0  125.73   30.71
   8  38   0   -2.50   22.31
   9  38   0  -11.57   21.98
  10  38   0  -36.60   21.82
  -9  39   0    0.60   20.19
  -9  39   0   13.70   23.40
  -8  39   0  -17.35   17.85
  -8  39   0   -1.49   20.18
  -7  39   0   59.93   22.22
  -7  39   0   18.82   21.41
  -6  39   0   -3.51   17.14
  -6  39   0   28.43   21.23
  -5  39   0    9.73   18.51
  -5  39   0    2.60   18.70
  -4  39   0    3.40   18.43
  -4  39   0   -0.05   15.92
  -3  39   0  201.54   30.61
  -2  39   0   14.27   17.89
  -1  39   0  247.75   33.78
   0  39   0   -3.92   19.33
   1  39   0  270.53   35.05
   2  39   0    1.66   18.13
   3  39   0  210.55   33.62
   4  39   0    9.14   20.73
   5  39   0  -13.56   18.07
   6  39   0  -14.11   18.55
   7  39   0   20.23   21.49
   8  39   0  -15.40   22.56
   9  39   0    2.78   24.52
  -8  40   0  -21.80   17.76
  -8  40   0   15.38   21.37
  -7  40   0   34.58   23.42
  -7  40   0  102.06   26.43
  -6  40   0    8.47   19.36
  -6  40   0   24.81   22.25
  -5  40   0   23.96   20.13
  -5  40   0   35.82   22.01
  -4  40   0   27.62   18.74
  -3  40   0   39.18   21.18
  -2  40   0  132.08   28.57
  -1  40   0    9.42   21.01
   0  40   0   62.22   23.42
   1  40   0   32.19   20.99
   2  40   0   96.23   26.84
   3  40   0   85.65   26.82
   4  40   0   33.35   23.01
   5  40   0   33.03   24.34
   6  40   0    0.92   22.49
   7  40   0   54.14   24.84
   8  40   0  -26.34   21.12
  -8  41   0   75.78   26.73
  -8  41   0   68.43   26.74
  -7  41   0   36.08   22.49
  -7  41   0    0.28   19.67
  -6  41   0   64.72   24.80
  -6  41   0   68.19   24.15
  -5  41   0   45.47   21.47
  -4  41   0  112.05   27.13
  -3  41   0    2.56   18.99
  -2  41   0   32.67   22.05
  -1  41   0   -0.80   18.92
   0  41   0   10.38   20.32
   1  41   0   12.94   20.54
   2  41   0   40.41   23.17
   3  41   0  -10.45   19.82
   4  41   0   84.53   26.67
   5  41   0   31.53   23.55
   6  41   0   44.36   24.14
   7  41   0  -22.67   18.92
   8  41   0   64.78   29.08
  -7  42   0   14.01   22.48
  -7  42   0  -22.81   19.68
  -6  42   0   43.97   23.58
  -6  42   0   -4.77   18.52
  -5  42   0   -2.59   19.63
  -4  42   0   74.36   24.64
  -3  42   0   12.27   19.78
  -2  42   0   25.59   22.39
  -1  42   0  -41.87   17.32
   0  42   0  189.26   32.88
   1  42   0  -27.13   17.10
   2  42   0   64.66   27.66
   3  42   0    1.15   22.91
   4  42   0   79.59   26.91
   5  42   0   -7.33   21.17
   6  42   0  -24.79   20.35
   7  42   0   -6.50   22.45
  -6  43   0   13.68   22.23
  -5  43   0   18.83   21.85
  -4  43   0   40.04   22.94
  -3  43   0   80.69   25.57
  -2  43   0  -13.44   19.27
  -1  43   0   21.27   22.74
   0  43   0    4.86   20.24
   1  43   0   36.57   22.11
   2  43   0  -26.17   17.78
   3  43   0   30.86   22.70
   4  43   0   21.51   22.44
   5  43   0   -5.51   23.04
   6  43   0   -0.47   21.79
  -5  44   0   54.39   25.57
  -4  44   0   13.89   21.36
  -3  44   0   39.57   23.13
  -2  44   0   -6.05   20.88
  -1  44   0   23.98   22.83
   0  44   0   12.71   24.01
   1  44   0   -5.64   20.11
   2  44   0    4.39   21.79
   3  44   0   45.21   26.88
   4  44   0   14.83   22.79
   5  44   0   61.00   28.67
  -3  45   0   14.18   22.48
  -2  45   0    4.37   23.70
  -1  45   0   86.91   28.09
   0  45   0    8.83   21.73
   1  45   0  100.71   29.03
   2  45   0  -10.43   22.78
   3  45   0   30.95   25.11
   3  45  -1   22.16   25.05
   2  45  -1    4.31   23.00
   1  45  -1   -1.76   22.31
   0  45  -1   -3.19   23.21
  -1  45  -1  -19.19   20.98
  -2  45  -1  -16.02   22.26
  -3  45  -1  -13.88   19.59
   5  44  -1   -4.72   23.74
   4  44  -1   51.44   25.45
   3  44  -1  -16.70   19.79
   2  44  -1   26.71   24.50
   1  44  -1    6.84   20.32
   0  44  -1   79.08   26.54
  -1  44  -1  -18.42   19.43
  -2  44  -1   -8.63   21.01
  -3  44  -1  -18.77   20.50
  -4  44  -1   28.59   23.47
   6  43  -1   10.81   26.88
   5  43  -1   12.04   23.26
   4  43  -1   18.88   23.98
   3  43  -1   29.91   24.58
   2  43  -1   -2.98   19.73
   1  43  -1   66.90   26.67
   0  43  -1    2.07   20.22
  -1  43  -1   -4.40   18.72
  -2  43  -1    1.67   20.95
  -3  43  -1   -9.74   19.66
  -4  43  -1   23.93   21.61
  -5  43  -1    7.01   19.21
  -6  43  -1   27.22   22.96
   7  42  -1   49.06   28.24
   6  42  -1   12.19   24.14
   5  42  -1   59.03   26.46
   4  42  -1   -2.42   18.12
   3  42  -1  -13.56   20.33
   2  42  -1   -3.55   17.46
   1  42  -1   30.86   23.42
   0  42  -1   15.54   21.15
  -1  42  -1   41.48   24.82
  -2  42  -1   37.86   23.66
  -3  42  -1   33.17   22.54
  -4  42  -1  -20.83   18.19
  -5  42  -1   41.02   23.12
  -6  42  -1   -5.09   19.31
  -7  42  -1   34.55   23.45
  -7  42  -1   41.41   23.10
   8  41  -1  -32.70   23.71
   7  41  -1    7.90   23.82
   6  41  -1   14.94   24.35
   5  41  -1  -11.49   19.36
   4  41  -1   -8.99   19.70
   3  41  -1   47.83   24.36
   2  41  -1   12.61   20.13
   1  41  -1  100.11   26.97
   0  41  -1   18.77   19.58
  -1  41  -1   90.19   28.69
  -2  41  -1    2.41   19.07
  -3  41  -1  159.41   29.58
  -4  41  -1   -9.15   19.09
  -5  41  -1   12.04   20.51
  -6  41  -1   -5.68   17.29
  -6  41  -1    1.97   19.75
  -7  41  -1   11.74   21.41
  -7  41  -1   20.48   20.27
   9  40  -1  -19.21   23.86
   8  40  -1  -18.42   21.56
   7  40  -1   34.51   26.70
   6  40  -1   16.80   21.28
   5  40  -1   31.94   21.03
   4  40  -1   94.83   27.58
   3  40  -1   33.54   23.31
   2  40  -1    7.11   18.26
   1  40  -1  116.79   28.95
   0  40  -1  117.31   29.60
  -1  40  -1   -1.22   18.78
  -2  40  -1   82.13   24.82
  -3  40  -1   13.82   19.44
  -4  40  -1   27.40   21.15
  -5  40  -1   31.85   21.67
  -5  40  -1   48.59   24.05
  -6  40  -1   10.91   19.35
  -6  40  -1   10.93   19.87
  -7  40  -1  155.13   31.13
  -7  40  -1  168.52   30.20
  -8  40  -1   -6.83   19.34
  -8  40  -1   10.05   21.16
   9  39  -1   -7.72   23.31
   8  39  -1   54.65   27.23
   7  39  -1  -11.88   19.38
   6  39  -1   49.52   24.42
   5  39  -1   11.34   20.32
   4  39  -1   60.74   23.96
   3  39  -1   21.52   21.20
   2  39  -1   35.76   21.38
   1  39  -1   21.13   19.71
   0  39  -1   -0.49   17.89
  -1  39  -1   11.49   18.66
  -2  39  -1   52.82   21.98
  -3  39  -1   35.62   20.99
  -4  39  -1  158.21   28.33
  -5  39  -1  -17.09   15.38
  -5  39  -1  -16.44   15.33
  -6  39  -1  168.60   30.07
  -6  39  -1  112.00   27.50
  -7  39  -1    5.67   19.85
  -7  39  -1   52.78   21.03
  -8  39  -1   47.89   24.44
  -9  39  -1  -23.59   20.34
  10  38  -1  -18.66   23.32
   9  38  -1  -14.41   23.01
   8  38  -1   -4.95   21.26
   7  38  -1   -9.06   19.95
   6  38  -1   -3.44   19.79
   5  38  -1  -10.94   18.68
   4  38  -1   78.68   25.43
   3  38  -1   38.15   23.13
   2  38  -1  158.06   29.22
   1  38  -1    1.47   18.78
   0  38  -1  138.45   28.38
  -1  38  -1    4.72   18.54
  -2  38  -1  249.64   32.03
  -3  38  -1   40.95   21.27
  -4  38  -1   53.15   20.54
  -4  38  -1   71.33   22.67
  -5  38  -1   15.38   19.14
  -5  38  -1   14.00   20.37
  -6  38  -1   71.00   23.62
  -6  38  -1   50.66   20.72
  -7  38  -1    3.11   20.32
  -8  38  -1   -2.85   17.24
  -9  38  -1  -16.02   21.23
  10  37  -1  -18.82   23.18
   9  37  -1  -17.98   21.85
   8  37  -1   -2.11   22.82
   7  37  -1   30.54   22.93
   6  37  -1    0.42   19.26
   5  37  -1  -13.55   17.12
   4  37  -1   59.80   22.94
   3  37  -1  174.53   30.26
   2  37  -1   33.34   19.91
   1  37  -1  120.68   25.07
   0  37  -1   -3.80   17.95
  -1  37  -1   81.45   23.85
  -2  37  -1   -4.84   17.58
  -3  37  -1  183.05   28.54
  -3  37  -1  145.40   25.54
  -4  37  -1    2.07   15.91
  -4  37  -1   37.46   20.89
  -5  37  -1   29.92   18.95
  -5  37  -1    2.10   16.27
  -6  37  -1   52.43   22.69
  -6  37  -1  138.33   27.08
  -7  37  -1   23.42   20.67
  -8  37  -1   17.84   21.96
  -9  37  -1  -31.27   16.10
 -10  37  -1   34.76   22.36
  11  36  -1  114.78   34.26
  10  36  -1  -20.33   23.15
   9  36  -1  -18.49   21.24
   8  36  -1  -24.01   20.06
   7  36  -1   79.49   26.10
   6  36  -1  -24.06   16.53
   5  36  -1  140.30   26.75
   4  36  -1    5.69   18.76
   3  36  -1   37.85   18.92
   2  36  -1    5.94   18.73
   1  36  -1  242.44   31.50
   0  36  -1    2.23   17.13
  -1  36  -1  148.55   26.46
  -2  36  -1  -26.98   13.56
  -3  36  -1   84.18   22.03
  -3  36  -1   33.09   17.86
  -4  36  -1   11.43   17.35
  -4  36  -1   -0.07   16.79
  -5  36  -1  143.30   25.94
  -5  36  -1  115.91   25.78
  -6  36  -1   70.87   22.58
  -7  36  -1  322.94   31.12
  -8  36  -1    5.75   18.07
  -9  36  -1   -2.83   19.78
 -10  36  -1   27.65   24.04
 -11  36  -1   99.31   30.41
  11  35  -1   42.63   28.84
  10  35  -1    2.09   23.33
   9  35  -1  -26.74   19.23
   8  35  -1   19.98   22.20
   7  35  -1   47.73   22.38
   6  35  -1  -14.36   16.47
   5  35  -1   10.84   17.86
   4  35  -1   47.49   20.91
   3  35  -1  274.65   28.46
   2  35  -1   40.10   21.89
   1  35  -1  115.15   24.11
   0  35  -1   18.31   15.69
  -1  35  -1   44.27   19.10
  -2  35  -1   32.62   17.94
  -2  35  -1   -4.02   14.88
  -3  35  -1  193.03   28.69
  -3  35  -1  129.70   24.97
  -4  35  -1   81.25   22.09
  -4  35  -1  101.46   23.43
  -5  35  -1   14.77   18.20
  -5  35  -1  -11.63   15.49
  -6  35  -1   32.37   19.56
  -7  35  -1  148.30   26.88
  -8  35  -1  -11.49   18.57
  -9  35  -1  -14.49   17.30
 -10  35  -1    1.84   20.18
 -11  35  -1   23.80   19.67
  12  34  -1   50.99   28.36
  11  34  -1   -1.84   23.16
  10  34  -1   13.75   22.79
   9  34  -1   99.64   27.64
   8  34  -1   47.70   23.19
   7  34  -1   74.90   25.10
   6  34  -1   23.20   18.63
   5  34  -1   40.97   21.12
   4  34  -1  257.57   27.40
   3  34  -1   35.09   18.53
   2  34  -1  212.98   29.79
   1  34  -1  -15.30   13.47
   0  34  -1   34.92   17.70
  -1  34  -1    4.47   14.89
  -2  34  -1  116.65   22.71
  -2  34  -1   96.69   20.39
  -3  34  -1    5.52   14.33
  -3  34  -1   -2.16   14.12
  -4  34  -1   23.83   16.91
  -4  34  -1   14.27   16.99
  -5  34  -1   18.20   17.38
  -6  34  -1   -9.60   16.09
  -7  34  -1   27.61   19.71
  -8  34  -1  -10.52   15.73
  -9  34  -1   71.42   24.26
 -10  34  -1    6.68   18.82
 -11  34  -1   53.02   25.32
 -12  34  -1   -2.48   21.97
  12  33  -1   77.64   28.61
  11  33  -1  -10.16   21.01
  10  33  -1   76.31   27.85
   9  33  -1   -4.23   18.17
   8  33  -1  289.63   31.95
   7  33  -1   15.82   20.30
   6  33  -1   64.21   21.28
   5  33  -1   -0.32   17.71
   4  33  -1  111.37   25.02
   3  33  -1   93.11   22.54
   2  33  -1  -13.84   12.97
   1  33  -1   -4.82   14.67
   0  33  -1   22.57   16.59
  -1  33  -1   18.41   15.71
  -1  33  -1   12.45   13.07
  -2  33  -1   -7.26   12.40
  -2  33  -1  -13.66   12.40
  -3  33  -1   23.69   17.18
  -3  33  -1  -17.43   13.44
  -4  33  -1  156.82   25.25
  -4  33  -1  158.57   26.04
  -5  33  -1  113.85   23.94
  -6  33  -1   50.54   20.71
  -7  33  -1   11.77   18.29
  -8  33  -1   92.78   24.27
  -9  33  -1  -17.51   17.09
 -10  33  -1  138.97   29.55
 -11  33  -1  -10.09   19.36
 -12  33  -1   47.30   22.80
  13  32  -1   -0.82   22.99
  12  32  -1   67.45   27.67
  11  32  -1   72.20   29.58
  10  32  -1  -11.03   21.04
   9  32  -1   -1.78   20.27
   8  32  -1   14.68   19.25
   7  32  -1   12.47   20.06
   6  32  -1  100.14   23.12
   5  32  -1   31.36   19.41
   4  32  -1  259.30   32.06
   3  32  -1   47.64   18.51
   2  32  -1  -21.91   12.85
   1  32  -1   23.10   16.36
   0  32  -1  279.26   24.86
  -1  32  -1  183.07   19.10
  -1  32  -1  193.54   26.01
  -2  32  -1    7.07   14.00
  -2  32  -1   10.13   14.18
  -3  32  -1   -1.44   14.25
  -3  32  -1   -0.25   14.29
  -4  32  -1   56.95   18.52
  -5  32  -1   24.04   17.40
  -6  32  -1  245.92   30.66
  -7  32  -1   42.29   20.25
  -8  32  -1    2.84   18.00
  -9  32  -1   -6.15   16.18
 -10  32  -1   33.59   20.27
 -11  32  -1   -3.65   17.61
 -12  32  -1   38.24   25.30
  13  31  -1   86.18   31.22
  12  31  -1  -26.98   21.55
  11  31  -1    5.83   22.58
  10  31  -1   28.23   23.07
   9  31  -1    3.98   19.97
   8  31  -1   23.45   21.57
   7  31  -1  101.38   26.41
   6  31  -1   36.75   18.41
   5  31  -1  179.29   28.74
   4  31  -1  130.27   24.96
   3  31  -1  165.09   25.51
   2  31  -1  -14.12   12.10
   1  31  -1   97.47   20.63
   0  31  -1   34.83   14.89
   0  31  -1   58.40   17.87
  -1  31  -1   29.57   13.73
  -1  31  -1   58.43   18.20
  -2  31  -1   -9.93   11.15
  -2  31  -1  -11.74   12.62
  -3  31  -1   34.74   16.39
  -3  31  -1   44.81   16.97
  -4  31  -1   21.37   14.41
  -5  31  -1   24.26   15.39
  -6  31  -1   91.33   21.31
  -7  31  -1   58.55   19.69
  -8  31  -1  223.80   30.33
  -9  31  -1   30.39   20.32
 -10  31  -1  134.13   26.65
 -11  31  -1  -16.85   19.56
 -12  31  -1   13.15   21.28
 -13  31  -1    9.42   24.92
  13  30  -1   -0.08   23.47
  12  30  -1   38.28   24.20
  11  30  -1   73.40   26.06
  10  30  -1  -12.32   17.45
   9  30  -1  220.45   34.16
   8  30  -1    9.82   19.16
   7  30  -1   76.56   22.81
   6  30  -1   25.81   17.76
   5  30  -1  181.43   27.46
   4  30  -1   25.29   16.80
   3  30  -1  -11.12   11.66
   2  30  -1   -8.39   13.23
   1  30  -1   28.91   15.92
   0  30  -1    6.43   12.24
   0  30  -1    0.34   11.19
  -1  30  -1    7.93   13.49
  -1  30  -1   16.53   13.28
  -2  30  -1   -9.49   10.42
  -2  30  -1   -0.67   14.19
  -3  30  -1  105.46   19.92
  -4  30  -1  204.25   22.37
  -5  30  -1  153.27   23.78
  -6  30  -1    4.99   14.66
  -7  30  -1  155.25   25.48
  -8  30  -1    5.11   17.17
  -9  30  -1  166.81   28.27
 -10  30  -1   19.88   20.13
 -11  30  -1   89.76   26.00
 -12  30  -1   -9.81   17.42
 -13  30  -1  116.98   29.01
  14  29  -1   18.87   26.28
  13  29  -1   25.34   24.51
  12  29  -1  -18.77   21.30
  11  29  -1  -21.30   19.00
  10  29  -1   50.50   24.68
   9  29  -1   -6.30   17.56
   8  29  -1  203.48   32.53
   7  29  -1    2.73   16.16
   6  29  -1    0.74   15.17
   5  29  -1   72.37   20.30
   4  29  -1   31.43   15.09
   3  29  -1   44.18   16.90
   2  29  -1   69.86   18.39
   1  29  -1   26.45   15.56
   1  29  -1   68.16   13.91
   0  29  -1   20.26   13.69
   0  29  -1   22.33   11.99
  -1  29  -1  458.77   26.80
  -1  29  -1  451.93   28.23
  -2  29  -1   12.67   14.18
  -2  29  -1   21.45   13.80
  -3  29  -1  181.62   23.91
  -4  29  -1  195.94   24.66
  -5  29  -1  517.37   32.05
  -6  29  -1   31.49   17.39
  -7  29  -1   42.43   18.17
  -8  29  -1    7.11   17.16
  -9  29  -1   31.38   19.36
 -10  29  -1  -10.63   15.65
 -11  29  -1   20.51   18.06
 -12  29  -1   -8.35   20.76
 -13  29  -1  132.68   30.19
  14  28  -1   89.52   31.34
  13  28  -1   20.38   24.84
  12  28  -1   28.17   23.16
  11  28  -1  -16.04   16.70
  10  28  -1  -14.88   16.34
   9  28  -1  -11.77   17.89
   8  28  -1   64.26   21.76
   7  28  -1   55.22   21.27
   6  28  -1   69.28   20.77
   5  28  -1  114.63   22.87
   4  28  -1  124.59   22.05
   3  28  -1   53.14   17.07
   2  28  -1   32.24   15.65
   1  28  -1   91.60   15.14
   1  28  -1   87.16   17.52
   0  28  -1  279.90   19.45
   0  28  -1  280.77   22.74
  -1  28  -1   36.52   14.68
  -1  28  -1   25.26   11.34
  -2  28  -1  159.45   22.44
  -2  28  -1  149.76   20.23
  -3  28  -1    2.30   13.49
  -4  28  -1   30.89   16.47
  -5  28  -1   46.56   17.36
  -6  28  -1  167.11   24.72
  -7  28  -1  233.08   28.20
  -8  28  -1  175.89   25.81
  -9  28  -1  319.51   29.02
 -10  28  -1   20.93   18.60
 -11  28  -1  100.64   25.00
 -12  28  -1   73.69   25.06
 -13  28  -1   30.64   23.53
 -14  28  -1  112.99   32.27
  14  27  -1   15.50   23.41
  13  27  -1   -3.27   20.71
  12  27  -1   37.51   24.86
  11  27  -1  -18.17   17.52
  10  27  -1   68.41   25.17
   9  27  -1  -12.11   14.99
   8  27  -1  216.19   31.20
   7  27  -1   13.76   16.90
   6  27  -1  263.39   26.16
   5  27  -1   92.10   20.64
   4  27  -1   66.40   17.55
   3  27  -1   -0.54   11.36
   2  27  -1  130.31   20.84
   1  27  -1    6.19    9.62
   1  27  -1   -6.76   11.13
   0  27  -1   52.26   12.94
   0  27  -1   65.71   16.32
  -1  27  -1   46.75   13.49
  -1  27  -1   73.85   16.97
  -2  27  -1  126.26   19.46
  -3  27  -1   80.20   17.66
  -4  27  -1  345.65   26.15
  -5  27  -1  -19.59   12.98
  -6  27  -1  124.19   22.57
  -7  27  -1    0.82   13.67
  -8  27  -1  479.72   32.80
  -9  27  -1   28.04   19.61
 -10  27  -1  211.80   30.58
 -11  27  -1    4.05   19.27
 -12  27  -1   87.14   24.32
 -13  27  -1   36.54   23.70
 -14  27  -1  106.40   29.09
  15  26  -1  -23.63   24.04
  14  26  -1   -1.54   24.89
  13  26  -1    1.06   20.55
  12  26  -1    6.44   18.00
  11  26  -1   23.53   20.43
  10  26  -1   41.59   19.76
   9  26  -1   53.16   21.18
   8  26  -1   63.60   19.88
   7  26  -1   44.24   18.09
   6  26  -1   19.09   13.96
   5  26  -1   -4.79   12.13
   4  26  -1    4.93   12.13
   3  26  -1    6.83   10.05
   2  26  -1  406.16   20.13
   2  26  -1  369.20   25.16
   1  26  -1   -1.78    7.88
   1  26  -1   -4.98   10.17
   0  26  -1   22.05   10.61
   0  26  -1   27.07   13.46
  -1  26  -1   27.14   12.94
  -1  26  -1   37.52   12.63
  -2  26  -1 1132.28   42.19
  -3  26  -1  179.77   19.15
  -4  26  -1  163.39   22.53
  -5  26  -1   15.09   13.58
  -6  26  -1   24.11   16.36
  -7  26  -1   -4.46   14.44
  -8  26  -1   22.26   15.91
  -9  26  -1   70.31   21.41
 -10  26  -1  106.05   24.86
 -11  26  -1   -2.55   18.86
 -12  26  -1   34.47   19.88
 -13  26  -1    4.11   16.01
 -14  26  -1   66.28   26.23
  15  25  -1  -25.90   24.82
  14  25  -1  -45.66   17.49
  13  25  -1   -1.19   21.08
  12  25  -1   78.54   25.96
  11  25  -1   -7.11   17.06
  10  25  -1    5.56   18.16
   9  25  -1   82.31   22.69
   8  25  -1   -8.16   14.44
   7  25  -1   16.26   15.04
   6  25  -1  271.41   25.07
   5  25  -1   -3.48   10.74
   4  25  -1    8.96   11.45
   3  25  -1   32.30   13.53
   2  25  -1  244.74   21.14
   2  25  -1  246.37   16.19
   1  25  -1  189.69   15.08
   1  25  -1  183.73   18.36
   0  25  -1   47.61   13.52
   0  25  -1   32.01   12.08
  -1  25  -1  738.95   33.13
  -1  25  -1  718.87   30.56
  -2  25  -1   42.77   13.76
  -3  25  -1  224.60   20.03
  -4  25  -1   14.05   12.46
  -5  25  -1  375.09   25.96
  -6  25  -1  258.81   23.88
  -7  25  -1   73.00   20.02
  -8  25  -1  156.67   24.65
  -9  25  -1  174.97   26.56
 -10  25  -1   57.17   21.99
 -11  25  -1   52.40   22.47
 -12  25  -1  106.39   26.47
 -13  25  -1   11.30   19.58
 -14  25  -1  -21.26   21.54
 -15  25  -1   14.50   22.81
  15  24  -1  -12.34   23.77
  14  24  -1  -31.40   18.69
  13  24  -1   89.66   28.42
  12  24  -1    4.42   19.31
  11  24  -1   23.58   21.02
  10  24  -1   32.73   20.57
   9  24  -1   32.47   18.85
   8  24  -1  -11.64   12.20
   7  24  -1  186.31   25.93
   6  24  -1   16.01   12.76
   5  24  -1  107.88   19.56
   4  24  -1  198.36   23.66
   3  24  -1   62.55   11.13
   3  24  -1   47.96   15.02
   2  24  -1  147.61   12.81
   2  24  -1  151.17   20.27
   1  24  -1  153.14   13.48
   1  24  -1  152.45   16.54
   0  24  -1  202.11   17.80
   0  24  -1  216.38   16.68
  -1  24  -1   34.19   11.39
  -1  24  -1   73.41   14.82
  -2  24  -1  112.22   17.63
  -3  24  -1   37.70   13.39
  -4  24  -1   16.15   12.15
  -5  24  -1  134.02   20.77
  -6  24  -1   79.87   18.79
  -7  24  -1  628.31   34.94
  -8  24  -1  155.01   24.59
  -9  24  -1  299.80   26.75
 -10  24  -1   15.51   17.23
 -11  24  -1  238.02   31.46
 -12  24  -1    7.92   19.86
 -13  24  -1   81.61   27.84
 -14  24  -1  -27.83   20.94
 -15  24  -1  -28.39   22.63
  15  23  -1    5.02   25.14
  14  23  -1    4.90   22.56
  13  23  -1   14.80   20.19
  12  23  -1   30.59   21.17
  11  23  -1   53.90   22.19
  10  23  -1   -6.38   14.18
   9  23  -1   -6.86   15.27
   8  23  -1    1.77   14.78
   7  23  -1    0.76   12.61
   6  23  -1    3.39   11.52
   5  23  -1   29.04   13.84
   4  23  -1    0.32   11.09
   3  23  -1  322.06   16.88
   3  23  -1  309.25   22.65
   2  23  -1   84.23   11.67
   2  23  -1  113.70   17.44
   1  23  -1  138.56   12.61
   1  23  -1  142.97   15.72
   0  23  -1  104.65   13.89
   0  23  -1  141.34   18.20
  -1  23  -1  678.90   30.22
  -2  23  -1  105.27   15.21
  -3  23  -1 1233.45   42.87
  -4  23  -1  167.69   17.59
  -5  23  -1  190.87   19.24
  -6  23  -1  111.37   19.82
  -7  23  -1   41.87   17.46
  -8  23  -1  429.24   29.80
  -9  23  -1   33.73   16.63
 -10  23  -1   18.84   16.58
 -11  23  -1   93.12   22.77
 -12  23  -1   34.21   22.20
 -13  23  -1   68.05   26.12
 -14  23  -1   -4.63   19.30
 -15  23  -1  100.41   34.30
  16  22  -1   43.98   27.87
  15  22  -1  -24.96   19.61
  14  22  -1  -27.26   17.73
  13  22  -1   40.81   23.68
  12  22  -1    5.88   17.09
  11  22  -1    6.92   16.37
  10  22  -1   56.54   20.89
   9  22  -1  239.24   31.31
   8  22  -1   42.62   17.71
   7  22  -1  211.47   26.50
   6  22  -1  116.58   20.08
   5  22  -1   11.01   11.15
   4  22  -1   -7.63    9.77
   4  22  -1    0.04    6.61
   3  22  -1  102.15   16.95
   3  22  -1   94.34   12.43
   2  22  -1  350.83   17.04
   2  22  -1  310.07   21.48
   1  22  -1  139.14   14.97
   1  22  -1  124.69   11.88
   0  22  -1   11.70    9.66
   0  22  -1   -0.07    6.68
  -1  22  -1   19.74   10.38
  -2  22  -1 1091.80   38.88
  -3  22  -1   58.21   13.74
  -4  22  -1  620.99   29.78
  -5  22  -1   11.84   11.98
  -6  22  -1   41.60   14.43
  -7  22  -1  -20.62   12.06
  -8  22  -1   92.42   20.57
  -9  22  -1  236.35   23.52
 -10  22  -1   58.32   19.91
 -11  22  -1  133.94   24.50
 -12  22  -1   22.48   20.63
 -13  22  -1   11.09   21.38
 -14  22  -1   13.28   20.28
 -15  22  -1   17.86   27.00
  16  21  -1    9.94   22.26
  15  21  -1   -7.29   22.31
  14  21  -1  -19.55   18.08
  13  21  -1   -9.42   19.20
  12  21  -1   82.42   24.75
  11  21  -1  -19.22   12.92
  10  21  -1  209.61   30.34
   9  21  -1   -4.16   14.23
   8  21  -1   71.20   19.80
   7  21  -1   32.29   13.82
   6  21  -1  498.75   30.18
   5  21  -1  327.89   24.06
   4  21  -1    5.30    6.94
   4  21  -1   11.24   11.17
   3  21  -1    9.46    7.34
   3  21  -1   13.02    9.64
   2  21  -1  146.03   15.59
   2  21  -1  166.47   12.23
   1  21  -1   38.48   11.21
   1  21  -1   29.97    8.47
   0  21  -1  126.56   14.59
   0  21  -1   87.84   14.53
  -1  21  -1   25.88   10.65
  -2  21  -1  504.31   25.23
  -3  21  -1   57.27   13.54
  -4  21  -1  703.48   31.24
  -5  21  -1   -2.94   10.13
  -6  21  -1  457.07   27.03
  -7  21  -1   50.59   16.92
  -8  21  -1  208.67   25.58
  -9  21  -1   24.19   16.23
 -10  21  -1  351.98   28.54
 -11  21  -1   -4.64   14.97
 -12  21  -1  646.52   41.00
 -13  21  -1   42.30   21.18
 -14  21  -1   -7.76   21.14
 -15  21  -1  -30.12   16.10
 -16  21  -1  115.00   31.76
  16  20  -1  114.25   31.01
  15  20  -1   -8.83   22.72
  14  20  -1   51.82   24.34
  13  20  -1   28.83   22.26
  12  20  -1   11.38   18.96
  11  20  -1   21.16   17.52
  10  20  -1  242.24   26.44
   9  20  -1   19.74   12.87
   8  20  -1   88.03   19.90
   7  20  -1   15.45   12.11
   6  20  -1  429.13   27.62
   5  20  -1   50.99   12.37
   4  20  -1  460.53   18.29
   4  20  -1  468.36   26.94
   3  20  -1   14.62    9.76
   3  20  -1   10.75    6.98
   2  20  -1  440.15   17.92
   2  20  -1  435.23   23.80
   1  20  -1  140.70   14.11
   1  20  -1  131.88   11.11
   0  20  -1    2.66    6.82
   0  20  -1   -0.28    7.86
  -1  20  -1   19.11    8.92
  -2  20  -1  388.68   21.79
  -3  20  -1   91.78   15.07
  -4  20  -1  299.42   20.38
  -5  20  -1   22.20   11.65
  -6  20  -1  135.27   18.95
  -7  20  -1   69.56   16.44
  -8  20  -1  594.66   33.33
  -9  20  -1   64.64   19.07
 -10  20  -1   24.80   16.76
 -11  20  -1  187.18   26.08
 -12  20  -1   41.73   21.23
 -13  20  -1  111.21   25.71
 -14  20  -1  179.34   34.14
 -15  20  -1   36.30   28.99
 -16  20  -1  421.05   56.15
  16  19  -1   -7.54   22.44
  15  19  -1   -1.78   22.03
  14  19  -1   10.38   18.57
  13  19  -1   13.43   20.03
  12  19  -1   -4.83   16.74
  11  19  -1  152.17   27.48
  10  19  -1  539.70   36.61
  -9 -19   1   33.35   13.19
   9  19  -1   22.50   13.19
   8  19  -1   43.17   15.86
  -8 -19   1   62.09   14.57
   7  19  -1   -4.59   10.48
   6  19  -1   44.83   12.48
   5  19  -1  269.48   21.51
   5  19  -1  304.68   14.20
   4  19  -1  170.44   11.20
   4  19  -1  182.19   17.35
   3  19  -1  250.32   13.36
   3  19  -1  261.02   19.15
   2  19  -1    0.89    5.39
   2  19  -1    4.08    8.54
   1  19  -1  159.82   11.49
   1  19  -1  154.10   14.11
   0  19  -1  121.37   12.64
   0  19  -1  111.71   10.63
  -1  19  -1  306.97   18.57
  -2  19  -1   63.61   12.22
  -3  19  -1  539.95   25.29
  -4  19  -1   74.01   14.44
  -5  19  -1   92.13   15.59
  -6  19  -1   38.81   12.84
  -7  19  -1   59.31   15.71
  -8  19  -1   52.52   16.86
  -9  19  -1   76.24   19.68
 -10  19  -1   61.10   19.23
 -11  19  -1   20.88   15.18
 -12  19  -1   64.95   21.67
 -13  19  -1   85.65   26.14
 -14  19  -1   32.17   25.50
 -15  19  -1  212.76   40.87
 -16  19  -1   82.79   39.05
  16  18  -1   13.11   24.10
  15  18  -1   -8.60   20.15
  14  18  -1   36.18   21.55
  13  18  -1   23.28   20.47
  12  18  -1  -12.88   16.07
  11  18  -1   21.95   17.62
  10  18  -1   34.96   18.22
   9  18  -1  981.64   45.99
  -9 -18   1  943.23   34.98
  -8 -18   1  -18.88    8.38
   8  18  -1    7.01   12.33
   7  18  -1  304.23   24.27
  -7 -18   1  388.21   21.37
   6  18  -1   70.25   14.17
  -6 -18   1   70.60   12.62
   5  18  -1  178.44   17.78
   5  18  -1  169.85   10.88
   4  18  -1  -10.96    7.80
   4  18  -1  -12.29    4.34
   3  18  -1  537.46   26.06
   3  18  -1  543.27   18.69
   2  18  -1   10.80    6.58
   1  18  -1  824.55   25.30
   1  18  -1  797.93   30.00
   0  18  -1  553.04   24.16
  -1  18  -1   56.72   11.72
  -2  18  -1   -8.74    7.19
  -3  18  -1  153.36   17.26
  -4  18  -1   42.34   12.11
  -5  18  -1  282.13   19.84
  -6  18  -1    2.69    9.41
  -7  18  -1  -18.06    9.33
  -8  18  -1    3.79   12.74
  -9  18  -1 1153.46   46.23
 -10  18  -1   39.18   18.25
 -11  18  -1  216.66   28.95
 -12  18  -1   39.45   19.37
 -13  18  -1  405.83   35.70
 -14  18  -1    5.29   21.20
 -15  18  -1  108.50   32.51
 -16  18  -1   43.68   27.66
  17  17  -1   54.23   28.44
  16  17  -1  -12.58   22.19
  15  17  -1   55.96   24.71
  14  17  -1   43.88   20.69
  13  17  -1  156.62   30.63
  12  17  -1    3.12   15.88
  11  17  -1  -10.43   12.75
  10  17  -1  119.40   23.44
  -9 -17   1  107.57   15.35
   9  17  -1  103.48   20.60
   8  17  -1   45.23   16.06
  -8 -17   1   54.48   12.64
  -7 -17   1   -2.11    7.55
   7  17  -1    0.52    8.33
  -6 -17   1  329.16   18.79
   6  17  -1  327.80   14.12
   6  17  -1  316.84   22.18
   5  17  -1  670.45   31.60
   5  17  -1  723.94   21.17
   4  17  -1   40.77    7.85
   4  17  -1   41.66   11.99
   3  17  -1  215.82   16.67
   3  17  -1  225.22   11.61
   2  17  -1   24.49    9.61
   1  17  -1 1265.91   32.80
   1  17  -1 1320.10   39.18
   0  17  -1  549.56   23.60
  -1  17  -1 1714.55   45.89
  -2  17  -1    9.62    8.64
  -3  17  -1   -5.32    7.64
  -4  17  -1  821.30   31.63
  -5  17  -1 1474.22   45.53
  -6  17  -1   82.89   14.81
  -7  17  -1   -3.08    9.09
  -8  17  -1   36.10   14.22
  -9  17  -1   41.08   15.74
 -10  17  -1  100.77   20.90
 -11  17  -1    4.85   16.25
 -12  17  -1  393.93   32.34
 -13  17  -1  307.06   32.58
 -14  17  -1   33.21   20.32
 -15  17  -1   58.98   23.53
 -16  17  -1   47.15   33.51
  17  16  -1  -14.58   23.07
  16  16  -1   -9.35   21.51
  15  16  -1   63.76   25.70
  14  16  -1  207.90   32.83
  13  16  -1    1.99   18.00
  12  16  -1  -15.68   13.31
  11  16  -1  -23.61   13.01
  10  16  -1   41.66   14.85
   9  16  -1   60.74   17.66
  -9 -16   1   76.16   13.99
   8  16  -1  -16.11    8.88
  -8 -16   1   -6.52    7.65
   7  16  -1    3.73   11.09
  -7 -16   1   27.29    8.93
   6  16  -1  262.64   12.80
  -6 -16   1  310.13   17.58
   6  16  -1  256.86   20.79
   5  16  -1  104.42   16.37
  -5 -16   1  107.42   12.05
   5  16  -1  113.18    8.65
   4  16  -1   -2.52    4.54
   4  16  -1    0.30    7.34
   3  16  -1  504.58   24.15
   3  16  -1  539.45   17.42
   2  16  -1 1088.19   35.43
   2  16  -1 1113.13   27.77
   0  16  -1  189.25   14.03
  -1  16  -1   12.21    8.58
  -2  16  -1 2532.79   59.74
  -3  16  -1  282.16   17.77
  -4  16  -1  687.69   28.25
  -5  16  -1 1127.07   38.05
  -6  16  -1  368.33   22.59
  -7  16  -1  260.74   20.13
  -8  16  -1  279.55   22.29
  -9  16  -1  236.35   22.53
 -10  16  -1  -10.85   13.09
 -11  16  -1    3.17   15.37
 -12  16  -1   29.04   19.12
 -13  16  -1   24.63   22.45
 -14  16  -1  177.20   35.60
 -15  16  -1   -4.26   24.63
 -16  16  -1  371.43   56.40
  17  15  -1  -44.25   19.47
  16  15  -1    8.17   23.01
  15  15  -1   21.15   21.60
  14  15  -1   63.96   23.17
  13  15  -1   -0.62   15.82
  12  15  -1  -12.54   14.93
  11  15  -1  -29.88   13.22
  10  15  -1  235.75   24.62
   9  15  -1   64.36   16.90
  -9 -15   1   67.43   13.28
  -8 -15   1   51.94   10.63
   8  15  -1   46.94   13.35
   7  15  -1   17.95    6.86
   7  15  -1   23.83   12.67
  -7 -15   1   43.09   10.41
   6  15  -1  727.57   33.04
   6  15  -1  680.07   20.78
  -6 -15   1  701.90   26.58
  -5 -15   1    0.30    6.24
   5  15  -1   -4.20    4.15
   5  15  -1   -5.38    7.53
   4  15  -1  578.89   26.51
   4  15  -1  602.95   17.89
  -4 -15   1  567.83   23.21
   3  15  -1  266.68   17.62
   3  15  -1  275.06   11.86
   2  15  -1 1559.61   43.06
   2  15  -1 1580.79   34.60
   1  15  -1 1307.51   31.55
   1  15  -1 1279.32   36.99
   0  15  -1  556.10   22.37
  -1  15  -1    8.57    6.04
  -2  15  -1  411.11   19.76
  -3  15  -1   87.92   12.90
  -4  15  -1  994.88   33.75
  -5  15  -1    9.24    9.40
  -6  15  -1  838.22   33.16
  -7  15  -1   14.94    9.70
  -8  15  -1  594.74   30.45
  -9  15  -1   57.85   16.03
 -10  15  -1  146.78   23.90
 -11  15  -1    9.99   16.09
 -12  15  -1  116.52   25.71
 -13  15  -1   46.95   24.59
 -14  15  -1   53.47   28.71
 -15  15  -1  -29.37   26.63
 -16  15  -1    3.86   32.45
 -17  15  -1    0.41   45.58
  17  14  -1  -19.98   21.15
  16  14  -1   29.76   23.26
  15  14  -1   -5.87   19.62
  14  14  -1  109.35   26.51
  13  14  -1   -1.85   15.26
  12  14  -1   19.41   18.09
  11  14  -1   19.70   17.17
  10  14  -1   60.85   18.78
   9  14  -1  141.36   21.83
  -9 -14   1  146.72   13.82
   8  14  -1  101.10   18.38
  -8 -14   1   98.31   11.41
   7  14  -1  -10.08    8.40
  -7 -14   1    3.79    7.36
   7  14  -1   -4.19    5.20
  -6 -14   1    2.51    6.88
   6  14  -1    2.87    5.41
   6  14  -1   -0.22    6.93
   5  14  -1  236.16   17.95
  -5 -14   1  254.39   15.32
   5  14  -1  231.55   10.76
   4  14  -1  259.20   17.98
  -4 -14   1  285.52   15.88
   4  14  -1  287.75   11.54
   3  14  -1  178.88   14.55
   3  14  -1  169.24    9.32
   2  14  -1 1141.14   34.59
   2  14  -1 1124.38   26.65
   1  14  -1   26.35    5.73
   1  14  -1   37.63    8.41
   0  14  -1 1155.25   33.18
  -1  14  -1 2583.54   58.13
  -2  14  -1   15.96    7.65
  -3  14  -1   34.19    9.62
  -4  14  -1  876.19   30.75
  -5  14  -1   86.38   14.04
  -6  14  -1   47.74   12.01
  -7  14  -1   -5.44    8.66
  -8  14  -1    7.50   10.99
  -9  14  -1  306.28   24.18
 -10  14  -1   83.10   20.63
 -11  14  -1   -2.27   14.33
 -12  14  -1  158.06   28.97
 -13  14  -1  202.37   34.61
 -14  14  -1  232.05   40.36
 -15  14  -1   36.38   31.10
 -16  14  -1   86.90   36.04
 -17  14  -1   16.27   46.49
  17  13  -1   28.54   24.43
  16  13  -1   -0.27   19.31
  15  13  -1   13.99   19.73
  14  13  -1    9.20   18.97
  13  13  -1  112.32   26.12
  12  13  -1   32.65   18.15
  11  13  -1    2.62   15.47
  10  13  -1  105.79   21.77
   9  13  -1   24.64   12.64
  -9 -13   1   39.92   10.38
   8  13  -1  287.59   15.39
  -8 -13   1  263.80   16.15
   8  13  -1  262.49   21.85
   7  13  -1  378.84   24.57
   7  13  -1  399.62   16.35
  -7 -13   1  380.08   18.70
   6  13  -1  418.50   15.34
  -6 -13   1  418.10   19.07
   6  13  -1  424.05   24.46
   5  13  -1   68.92    7.70
   5  13  -1   44.57   11.83
  -5 -13   1   63.74    9.80
   4  13  -1  129.56    7.72
  -4 -13   1  123.26   11.32
   4  13  -1  102.41   13.98
  -3 -13   1    9.01    6.02
   3  13  -1   15.12    7.86
   3  13  -1   11.12    4.74
   2  13  -1  799.09   20.36
   2  13  -1  795.72   27.09
   1  13  -1  423.36   14.48
   1  13  -1  406.03   17.93
   0  13  -1  491.12   19.47
  -1  13  -1 3391.47   70.36
  -2  13  -1  814.91   26.82
  -3  13  -1   20.66    8.17
  -4  13  -1  405.07   20.30
  -5  13  -1 1602.62   45.47
  -6  13  -1  329.18   19.55
  -7  13  -1   72.18   14.29
  -8  13  -1  202.72   18.29
  -9  13  -1   33.19   14.19
 -10  13  -1  236.39   27.97
 -11  13  -1  -21.86   12.20
 -12  13  -1  -12.17   17.48
 -13  13  -1  523.33   41.24
 -14  13  -1  -19.74   24.31
 -15  13  -1   32.60   28.18
 -16  13  -1   13.90   39.53
 -17  13  -1  163.83   54.74
  17  12  -1  -11.10   19.30
  16  12  -1   53.28   22.16
  15  12  -1   71.85   24.00
  14  12  -1    0.97   15.73
  13  12  -1  125.66   26.12
  12  12  -1  165.64   27.61
  11  12  -1   16.49   16.01
  10  12  -1   -7.97   11.15
   9  12  -1  592.40   33.03
  -9 -12   1  583.01   24.09
  -8 -12   1   97.01   12.14
   8  12  -1   86.39   11.31
   8  12  -1  102.24   17.79
   7  12  -1  437.67   25.82
  -7 -12   1  434.67   19.70
   7  12  -1  457.27   17.80
  -6 -12   1   -1.21    5.89
   6  12  -1   -2.37    8.00
   6  12  -1   -4.61    4.23
   5  12  -1  968.20   34.85
   5  12  -1  932.77   23.25
  -5 -12   1  970.71   29.44
   4  12  -1  254.05   16.63
   4  12  -1  238.63    9.92
  -4 -12   1  258.59   14.59
   3  12  -1 1348.35   28.24
  -3 -12   1 1332.81   35.63
   3  12  -1 1307.77   37.84
   2  12  -1   22.29    6.80
   2  12  -1   17.62    4.51
   1  12  -1 1046.33   24.82
   1  12  -1 1049.52   29.90
   0  12  -1  240.12   13.01
  -1  12  -1 1075.47   30.40
  -2  12  -1   88.72    9.33
  -3  12  -1 1396.25   37.80
  -4  12  -1  174.48   13.69
  -5  12  -1 1986.33   51.88
  -6  12  -1  785.45   30.27
  -7  12  -1  504.34   26.10
  -8  12  -1   17.46   11.22
  -9  12  -1  970.71   40.75
 -10  12  -1    1.01   14.88
 -11  12  -1  231.75   25.50
 -12  12  -1   -3.14   17.95
 -13  12  -1   49.08   27.06
 -14  12  -1  -44.41   22.97
 -15  12  -1   10.49   27.25
 -16  12  -1   67.53   43.77
 -17  12  -1   52.11   59.10
  17  11  -1   70.89   26.34
  16  11  -1  130.36   29.71
  15  11  -1  214.47   34.21
  14  11  -1  -27.07   13.73
  13  11  -1  136.02   26.38
  12  11  -1   -1.42   14.28
  11  11  -1  306.34   27.91
  10  11  -1  -14.40   11.35
  -9 -11   1   -5.54    7.33
   9  11  -1   -2.58   10.33
   9  11  -1    1.08    7.10
   8  11  -1   34.00    8.72
   8  11  -1   39.15   12.83
  -8 -11   1   37.95    9.16
   7  11  -1  112.97   16.70
  -7 -11   1  112.13   11.10
   7  11  -1  105.63   10.20
   6  11  -1   19.87    9.66
   6  11  -1   31.86    6.63
  -6 -11   1   32.76    8.53
   5  11  -1   19.52    5.08
  -5 -11   1   30.12    7.61
   5  11  -1   14.23    8.58
   4  11  -1 1502.21   30.43
  -4 -11   1 1498.86   38.01
   4  11  -1 1436.88   41.63
   3  11  -1 1948.55   36.16
  -3 -11   1 1869.75   44.11
   3  11  -1 1774.08   46.08
   2  11  -1 1566.41   39.58
   2  11  -1 1604.71   31.49
  -2 -11   1 1515.64   38.37
   1  11  -1 3338.37   67.85
   1  11  -1 3391.55   60.75
   0  11  -1 1039.57   28.51
  -1  11  -1   14.21    5.98
  -2  11  -1   47.06    8.17
  -3  11  -1 1493.81   38.76
  -4  11  -1 1200.87   35.03
  -5  11  -1   79.46   12.59
  -6  11  -1  280.42   18.80
  -7  11  -1  309.71   20.75
  -8  11  -1  574.17   29.24
  -9  11  -1    4.07   11.40
 -10  11  -1   95.79   20.33
 -11  11  -1   91.05   23.48
 -12  11  -1  146.79   28.96
 -13  11  -1  185.06   35.52
 -14  11  -1  -42.08   21.63
 -15  11  -1  285.64   52.86
 -16  11  -1   -5.02   32.29
 -17  11  -1   70.38   57.61
  18  10  -1   20.12   23.89
  17  10  -1   29.64   21.51
  16  10  -1   59.91   24.42
  15  10  -1   -4.72   17.32
  14  10  -1   11.18   18.15
  13  10  -1   47.73   20.29
  12  10  -1   97.18   22.64
  11  10  -1  746.93   39.40
  10  10  -1   88.53   19.14
   9  10  -1  169.51   22.35
  -9 -10   1  152.94   12.85
  -8 -10   1    4.73    6.75
   8  10  -1    2.30    9.25
   8  10  -1    1.15    7.00
   7  10  -1 1264.93   32.47
  -7 -10   1 1169.58   34.11
   7  10  -1 1226.00   42.90
  -6 -10   1   29.71    7.85
   6  10  -1   49.61    7.80
   6  10  -1   36.32   10.82
   5  10  -1   36.94    5.78
   5  10  -1   32.87    9.86
  -5 -10   1   47.07    8.20
   4  10  -1  217.93    8.80
  -4 -10   1  229.63   12.43
   4  10  -1  224.07   14.81
   3  10  -1   -1.59    2.73
  -3 -10   1    0.48    4.29
   3  10  -1    3.50    4.97
   2  10  -1  979.64   28.44
  -2 -10   1  996.93   27.59
   2  10  -1  973.26   21.20
   1  10  -1  448.31   13.28
   1  10  -1  466.47   17.27
   0  10  -1 1033.22   27.52
  -1  10  -1 2467.55   52.30
  -2  10  -1    2.95    4.82
  -3  10  -1  295.85   14.55
  -4  10  -1  237.58   14.62
  -5  10  -1  136.28   12.80
  -6  10  -1  306.15   19.41
  -7  10  -1  147.90   15.62
  -8  10  -1    3.23   10.21
  -9  10  -1  -10.14   11.33
 -10  10  -1  153.97   24.49
 -11  10  -1  274.88   28.01
 -12  10  -1  272.24   35.20
 -13  10  -1   31.63   25.61
 -14  10  -1  148.96   37.45
 -15  10  -1    3.16   35.21
 -16  10  -1  319.11   68.25
 -17  10  -1   46.16   64.86
  18   9  -1  -29.56   16.69
  17   9  -1   -7.20   21.07
  16   9  -1   27.14   22.19
  15   9  -1   96.50   25.79
  14   9  -1   32.25   19.19
  13   9  -1   33.33   17.92
  12   9  -1  665.82   39.29
  11   9  -1  136.66   23.35
  10   9  -1  391.33   28.06
   9   9  -1   -2.88    9.81
  -9  -9   1    4.37    6.95
   8   9  -1  799.39   35.08
  -8  -9   1  770.20   26.55
   8   9  -1  796.75   26.51
  -7  -9   1  322.03   16.40
   7   9  -1  331.33   21.60
   7   9  -1  321.11   15.53
   6   9  -1  928.96   24.87
   6   9  -1  900.95   33.69
  -6  -9   1  893.92   27.31
   5   9  -1  119.15    7.85
   5   9  -1  119.14   12.28
   4   9  -1  291.75   16.36
  -4  -9   1  302.40   13.70
   4   9  -1  320.01   10.35
   3   9  -1  320.56   15.79
  -3  -9   1  330.57   14.21
   3   9  -1  324.93    9.63
   2   9  -1  211.43    7.41
  -2  -9   1  194.62   10.71
   2   9  -1  195.64   11.49
   1   9  -1   75.40    7.34
   1   9  -1   74.81    5.25
   0   9  -1  561.75   18.38
  -1   9  -1 1399.51   33.54
  -2   9  -1 2350.19   50.29
  -3   9  -1  502.96   19.02
  -4   9  -1  206.37   13.29
  -5   9  -1  321.83   17.72
  -6   9  -1 2343.47   58.92
  -7   9  -1  -13.97    8.25
  -8   9  -1  206.84   18.64
  -9   9  -1   -1.05   12.15
 -10   9  -1  237.15   28.05
 -11   9  -1   20.12   16.58
 -12   9  -1  398.11   35.18
 -13   9  -1  -21.31   21.16
 -14   9  -1  -17.43   24.75
 -15   9  -1   13.95   38.71
 -16   9  -1   15.93   49.27
 -17   9  -1  -65.04   74.52
  18   8  -1   32.20   23.37
  17   8  -1   39.80   24.97
  16   8  -1  321.20   39.67
  15   8  -1    0.02   17.93
  14   8  -1  229.09   32.12
  13   8  -1   82.02   21.89
  12   8  -1  427.05   32.11
  11   8  -1  199.91   26.50
  10   8  -1   33.07   14.27
  -9  -8   1   52.27    9.95
   9   8  -1   22.79   11.86
  -8  -8   1  467.88   20.34
   8   8  -1  506.69   20.94
   8   8  -1  458.89   26.35
   7   8  -1  112.67   16.19
  -7  -8   1  106.05   10.72
   7   8  -1   98.49    9.68
   6   8  -1   65.27    8.46
   6   8  -1   48.14   11.12
  -6  -8   1   70.79    9.20
   5   8  -1  805.78   21.03
   5   8  -1  749.22   28.48
  -5  -8   1  881.96   25.17
   4   8  -1   71.01    5.18
  -4  -8   1   70.06    7.24
   4   8  -1   73.31   10.15
   3   8  -1  147.19   10.53
  -3  -8   1  141.04    9.21
  -2  -8   1  509.57   17.05
   2   8  -1  499.28   17.80
   1   8  -1  399.93   14.64
   0   8  -1  251.61   11.52
  -1   8  -1   54.02    7.34
  -2   8  -1 1692.69   38.59
  -3   8  -1   54.45    8.14
  -4   8  -1  221.43   13.33
  -5   8  -1  903.44   30.13
  -6   8  -1  148.30   14.67
  -7   8  -1  274.27   19.79
  -8   8  -1   -4.70    9.06
  -9   8  -1  302.10   23.87
 -10   8  -1   29.07   17.24
 -11   8  -1   29.07   20.12
 -12   8  -1  137.75   29.67
 -13   8  -1   -9.89   25.27
 -14   8  -1   64.35   35.56
 -15   8  -1   -1.65   34.49
 -16   8  -1  224.85   62.81
 -17   8  -1   32.36   75.05
  18   7  -1   -4.49   21.32
  17   7  -1  151.92   30.49
  16   7  -1   76.05   26.07
  15   7  -1  138.81   28.94
  14   7  -1   26.46   18.24
  13   7  -1  148.78   27.01
  12   7  -1  492.18   34.07
  11   7  -1  743.70   39.19
  10   7  -1  524.92   31.27
   9   7  -1   60.63   14.98
  -9  -7   1   95.03   11.90
   8   7  -1 1886.10   56.41
  -8  -7   1 1854.17   45.67
  -7  -7   1   95.69    9.80
   7   7  -1   88.45    9.63
   7   7  -1  102.01   15.11
   6   7  -1  133.31   13.48
  -6  -7   1  119.88    9.72
   6   7  -1  120.07    9.30
   5   7  -1  103.85    7.38
   5   7  -1   90.69    9.74
  -5  -7   1   99.36    8.04
   4   7  -1   23.35    6.87
  -4  -7   1   34.88    6.40
   4   7  -1   36.81    4.91
   3   7  -1 2948.99   61.50
  -3  -7   1 2965.49   59.13
  -2  -7   1  871.33   23.24
   2   7  -1  899.54   24.63
  -1  -7   1 6325.96  113.60
   1   7  -1 6347.48  111.40
   0   7  -1 7411.95  128.20
  -1   7  -1  256.68   11.32
  -2   7  -1  202.37   10.27
  -3   7  -1 1718.08   40.13
  -4   7  -1  198.60   12.08
  -5   7  -1   91.05   12.03
  -6   7  -1   -1.74    7.10
  -7   7  -1    9.78    9.97
   9  -7   1   53.98   14.22
  10  -7   1   27.16   15.08
  11  -7   1  285.69   25.61
  12  -7   1   39.20   16.39
 -14   7  -1   40.56   37.72
 -15   7  -1  484.50   74.82
 -16   7  -1   27.86   63.10
 -17   7  -1  743.16  157.54
  18   6  -1    3.18   21.50
  17   6  -1   29.41   21.49
  16   6  -1   10.63   18.99
  15   6  -1   32.81   20.53
  14   6  -1   30.69   18.67
  13   6  -1  149.86   25.38
  12   6  -1   22.01   16.54
  11   6  -1 1321.76   52.36
  10   6  -1  228.59   21.49
  -9  -6   1  546.41   22.06
   9   6  -1  574.29   30.34
  -8  -6   1   70.24   11.02
   8   6  -1   70.96   12.97
   7   6  -1 2469.67   54.70
   7   6  -1 2601.12   65.54
  -7  -6   1 2555.21   56.28
   6   6  -1    6.53    5.06
   6   6  -1   -1.74    6.76
  -6  -6   1    6.87    4.93
  -5  -6   1  645.85   20.50
   5   6  -1  680.86   19.13
   5   6  -1  663.63   25.25
   4   6  -1  141.51    7.04
  -4  -6   1  132.54    8.61
   4   6  -1  154.01   11.23
  -3  -6   1  186.82    9.69
   3   6  -1  189.66   11.21
   2   6  -1   62.35    7.37
  -2  -6   1   48.86    5.56
  -1  -6   1 1044.86   24.94
   1   6  -1 1016.46   24.51
   0   6  -1 1831.92   37.43
  -1   6  -1 1970.08   40.30
  -2   6  -1  193.70   10.22
  -3   6  -1  850.24   24.41
  -4   6  -1  225.05   13.11
  -5   6  -1  540.18   21.74
   6  -6   1    5.00    7.20
   7  -6   1 1075.97   37.58
   8  -6   1  429.65   24.86
   9  -6   1  -16.20    8.39
  10  -6   1    6.34   12.41
  11  -6   1  567.43   33.97
  12  -6   1   13.04   14.74
  13  -6   1  132.67   24.90
  14  -6   1  -15.14   15.58
 -16   6  -1   65.02   85.92
 -17   6  -1  374.83  150.25
  18   5  -1  -15.74   17.47
  17   5  -1   72.27   25.72
  16   5  -1   18.89   20.00
  15   5  -1  269.98   29.70
  14   5  -1   41.40   19.22
  13   5  -1  364.56   30.29
  12   5  -1   53.59   18.50
  11   5  -1  309.67   26.53
  10   5  -1  116.37   19.31
  -9  -5   1   14.05    7.87
   9   5  -1   14.70   10.52
   8   5  -1  244.26   19.55
  -8  -5   1  219.24   14.65
   7   5  -1  182.66   16.29
  -7  -5   1  163.25   11.94
   6   5  -1  154.57   10.30
  -6  -5   1  154.35   10.24
   6   5  -1  178.00   14.29
  -5  -5   1  623.64   19.67
   5   5  -1  615.08   23.78
   5   5  -1  607.05   18.26
   4   5  -1   50.54    8.22
  -4  -5   1   62.43    6.28
   4   5  -1   61.67    5.30
   3   5  -1  603.35   20.04
  -3  -5   1  653.21   18.27
   2   5  -1  456.54   14.93
  -2  -5   1  446.69   14.00
  -1  -5   1 1791.97   36.66
   1   5  -1 1777.49   35.99
   0   5  -1  143.02    6.89
  -1   5  -1  434.92   13.29
  -2   5  -1 2680.95   52.65
  -3   5  -1 3642.28   70.84
  -4   5  -1  282.45   14.50
   5  -5   1   51.11    9.54
   6  -5   1  392.16   20.63
   7  -5   1   -4.55    7.96
   8  -5   1   73.82   13.22
   9  -5   1   15.75    9.62
  10  -5   1   59.50   17.03
  11  -5   1  230.82   27.77
  12  -5   1  211.66   28.37
  13  -5   1   15.27   16.28
  14  -5   1    2.69   17.22
  15  -5   1  185.74   30.39
 -17   5  -1  272.86  254.31
  18   4  -1   39.26   25.37
  17   4  -1   31.98   20.92
  16   4  -1  167.68   30.56
  15   4  -1   29.63   20.02
  14   4  -1  234.98   30.57
  13   4  -1   35.97   17.05
  12   4  -1  295.22   26.78
  11   4  -1  547.53   33.43
  10   4  -1  148.16   21.09
 -10  -4   1  115.10   13.07
   9   4  -1  156.98   19.90
  -9  -4   1  147.28   12.79
   8   4  -1  159.65   17.02
  -8  -4   1  146.64   13.15
  -7  -4   1  113.22   10.37
   7   4  -1  124.89   14.00
   6   4  -1  399.17   20.48
  -6  -4   1  424.01   16.76
   5   4  -1  848.59   28.18
   5   4  -1  871.32   22.92
  -5  -4   1  821.24   23.66
   4   4  -1  359.83   16.01
  -4  -4   1  347.80   13.20
   4   4  -1  352.05   11.85
  -3  -4   1 1143.88   26.92
   3   4  -1 1166.16   29.45
  -2  -4   1 2820.59   53.71
   2   4  -1 2808.05   54.11
  -1  -4   1    4.40    2.32
   1   4  -1    8.21    2.59
   0  -4   1  442.25   12.38
   0   4  -1  456.94   12.28
  -1   4  -1   47.77    3.87
  -2   4  -1   72.51    6.48
  -3   4  -1 1193.74   30.12
   4  -4   1   10.40    5.62
   5  -4   1  442.43   19.98
   6  -4   1   -4.05    6.31
   7  -4   1  237.64   17.98
   8  -4   1   97.04   14.37
   9  -4   1    9.07   10.55
  10  -4   1   19.70   13.13
  11  -4   1   25.74   15.58
  12  -4   1   25.50   17.16
  13  -4   1  -11.50   14.58
  14  -4   1   83.93   23.22
  15  -4   1    2.58   17.45
  16  -4   1  120.95   29.09
  18   3  -1  -17.28   20.36
  17   3  -1    4.70   21.02
  16   3  -1   33.21   21.00
  15   3  -1   25.30   18.27
  14   3  -1  154.84   26.77
  13   3  -1   17.42   16.18
  12   3  -1  227.42   24.06
  11   3  -1  121.40   21.61
 -10  -3   1  737.95   28.08
  10   3  -1  752.55   35.96
   9   3  -1  237.62   19.93
  -9  -3   1  218.11   14.74
   8   3  -1 2492.35   65.93
  -8  -3   1 2480.66   57.22
  -7  -3   1  159.22   12.06
   7   3  -1  156.65   14.89
   6   3  -1  432.82   21.17
  -6  -3   1  432.20   17.12
   5   3  -1  304.40   16.04
  -5  -3   1  288.64   12.92
   4   3  -1  802.83   20.32
  -4  -3   1  829.61   22.05
   4   3  -1  806.47   24.96
   3   3  -1 1131.02   28.13
  -3  -3   1 1084.79   25.70
   3   3  -1 1091.63   22.81
  -2  -3   1  116.02    5.89
   2   3  -1  108.13    6.50
  -1  -3   1 1593.77   31.92
   1   3  -1 1607.34   31.29
   1  -3   1  602.32   15.20
  -1   3  -1  605.11   15.05
   2  -3   1    3.81    3.53
  -2   3  -1    3.98    3.33
   3  -3   1  683.03   21.07
   3  -3   1  690.93   21.24
   4  -3   1 1221.25   33.15
   5  -3   1   57.46    9.96
   6  -3   1  208.43   15.45
   7  -3   1  301.35   20.08
   8  -3   1 1234.59   43.11
   9  -3   1   91.70   16.68
  10  -3   1  420.11   27.82
  11  -3   1   -4.88   13.19
  12  -3   1   49.40   18.82
  13  -3   1    0.41   14.95
  14  -3   1   81.59   21.33
  15  -3   1   -8.49   17.89
  16  -3   1   11.19   18.74
  17  -3   1   51.06   25.62
  18   2  -1   78.03   27.23
  17   2  -1   12.22   18.03
  16   2  -1   97.27   25.64
  15   2  -1   34.80   19.75
  14   2  -1  237.21   26.53
  13   2  -1   42.19   17.75
  12   2  -1  217.41   27.71
  11   2  -1  244.38   23.39
 -10  -2   1  179.60   15.40
  10   2  -1  185.73   19.47
  -9  -2   1  102.95   13.17
   9   2  -1   80.79   15.35
   8   2  -1  146.21   18.26
  -8  -2   1  109.52   12.11
   7   2  -1  427.01   22.49
  -7  -2   1  401.84   17.92
  -6  -2   1  159.83   10.63
   6   2  -1  176.03   13.84
   5   2  -1   52.51    9.10
  -5  -2   1   34.26    6.54
  -4  -2   1  798.39   21.83
   4   2  -1  804.11   24.47
  -3  -2   1  339.23   12.12
   3   2  -1  347.60   13.56
   2   2  -1   39.07    3.94
  -2  -2   1   38.07    3.55
  -1   2  -1  623.87   14.99
   1  -2   1  631.78   15.11
   2  -2   1 1445.48   31.22
   2  -2   1 1486.62   31.88
   3  -2   1 3345.58   65.42
   3  -2   1 3316.84   63.63
   4  -2   1  859.77   25.64
   4  -2   1  843.85   26.28
   5  -2   1  169.18   12.23
   5  -2   1  161.11   12.55
   6  -2   1   12.98    6.51
   7  -2   1  402.80   22.67
   8  -2   1  826.64   34.31
   9  -2   1  149.51   19.61
  10  -2   1    9.95   11.77
  11  -2   1  105.34   20.54
  12  -2   1  215.64   28.60
  13  -2   1   74.58   21.34
  14  -2   1   69.06   22.03
  15  -2   1  -15.38   16.54
  16  -2   1    1.27   20.36
  17  -2   1   -5.76   18.04
  18  -2   1   43.99   26.59
  18   1  -1   -6.71   21.20
  17   1  -1  -16.09   17.87
  16   1  -1  -11.04   17.27
  15   1  -1  371.28   33.48
  14   1  -1  202.85   29.23
  13   1  -1  125.08   23.66
  12   1  -1  -23.89   11.04
  11   1  -1   13.42   13.74
 -10  -1   1   73.89   13.97
  10   1  -1   88.85   16.89
   9   1  -1  101.36   16.94
  -9  -1   1   96.28   13.57
  -8  -1   1  554.67   22.78
   8   1  -1  572.67   27.84
   7   1  -1  775.72   30.41
   6   1  -1   56.07   10.39
   5   1  -1 1053.66   31.36
   4   1  -1  991.55   27.87
   3   1  -1 4931.00   89.40
   2   1  -1   59.32    4.37
   2  -1   1  102.04    6.15
   2  -1   1   85.39    5.90
   3  -1   1 1245.47   29.58
   3  -1   1 1209.97   30.56
   4  -1   1 2297.30   51.29
   4  -1   1 2237.66   48.99
   5  -1   1  337.36   17.58
   5  -1   1  347.65   16.71
   6  -1   1  523.46   23.09
   6  -1   1  475.14   21.60
   7  -1   1   69.45   13.44
   8  -1   1  211.67   18.52
   9  -1   1   98.24   16.79
  10  -1   1  104.73   19.01
  11  -1   1  176.33   24.81
  12  -1   1   68.52   20.53
  13  -1   1   62.99   20.24
  14  -1   1   10.13   17.75
  15  -1   1   63.46   22.27
  16  -1   1   30.20   22.64
  17  -1   1   19.48   23.53
  18  -1   1   -7.07   20.94
  18   0  -1  -13.92   17.71
  17   0  -1    7.79   18.42
  16   0  -1    8.91   16.95
  15   0  -1  234.70   32.13
  14   0  -1   15.92   15.76
  13   0  -1   52.11   18.56
  12   0  -1  -23.86   11.58
  11   0  -1  242.83   23.40
 -10   0   1  -10.26    8.80
  10   0  -1   -6.97   10.21
   9   0  -1  266.86   20.73
   8   0  -1   11.50    9.58
   7   0  -1  349.55   20.18
   6   0  -1   -3.77    5.46
   5   0  -1    8.37    5.94
   4   0  -1   -1.63    4.09
   3   0  -1  796.72   21.61
   2   0  -1   -0.69    1.87
   2   0   1   -1.06    1.87
   2   0   1    2.86    2.98
   3   0   1 1363.15   33.54
   3   0   1 1428.29   32.07
   4   0   1   -1.59    5.14
   4   0   1    4.03    4.99
   5   0   1 2337.14   55.39
   5   0   1 2354.06   52.67
   6   0   1   -1.60    6.30
   6   0   1   -5.01    5.82
   7   0   1 1830.47   52.15
   7   0   1 1829.69   49.37
   8   0   1   -7.14    8.27
   9   0   1  313.97   22.97
  10   0   1   -0.62    8.41
  11   0   1  195.84   22.03
  12   0   1  -22.64   12.14
  13   0   1  -19.29   11.63
  14   0   1  -22.56   14.84
  15   0   1  -27.93   15.93
  16   0   1  -13.74   17.23
  17   0   1    2.02   19.52
  18   0   1   10.06   21.63
  18  -1  -1    3.83   21.36
  17  -1  -1   16.02   21.17
  16  -1  -1    1.20   18.64
  15  -1  -1  359.42   32.46
  14  -1  -1  179.91   28.08
  13  -1  -1   93.07   21.84
  12  -1  -1  -16.52   12.11
  11  -1  -1   14.56   13.11
  10  -1  -1   63.91   16.11
   9  -1  -1   93.27   16.54
   8  -1  -1  577.46   27.63
   7  -1  -1  785.43   30.29
   6  -1  -1   65.38   10.56
   5  -1  -1 1045.13   30.86
   4  -1  -1  971.28   27.07
   3  -1  -1 5031.20   90.65
   2  -1  -1   61.84    4.23
   2   1   1   86.45    5.34
   2   1   1   87.78    6.32
   3   1   1 1192.59   28.00
   3   1   1 1204.13   30.40
   4   1   1 2205.17   50.34
   4   1   1 2192.21   46.90
   5   1   1  326.85   15.68
   5   1   1  336.18   17.66
   6   1   1  526.07   23.99
   6   1   1  523.82   22.01
   7   1   1   54.66   12.42
  -7  -1  -1   68.17    8.84
   7   1   1   80.98   13.31
   8   1   1  208.45   17.40
  -8  -1  -1  195.58   12.63
   9   1   1   98.40   17.28
  10   1   1  101.43   19.44
  11   1   1  175.53   24.79
  12   1   1   81.76   21.44
  13   1   1   62.54   19.92
  14   1   1    1.38   14.49
  15   1   1   46.86   22.47
  16   1   1   31.02   22.17
  17   1   1   14.98   22.18
  18   1   1  -22.68   22.20
  18  -2  -1  109.26   29.44
  17  -2  -1   -2.09   18.54
  16  -2  -1   98.99   25.81
  15  -2  -1   47.86   20.46
  14  -2  -1  249.21   31.07
  13  -2  -1   26.08   17.21
  12  -2  -1  192.16   26.42
  11  -2  -1  242.04   23.26
  10  -2  -1  177.73   21.96
   9  -2  -1  100.40   16.57
   8  -2  -1  164.95   16.44
   7  -2  -1  467.80   23.11
   6  -2  -1  186.56   13.80
   5  -2  -1   44.32    8.63
   4  -2  -1  835.15   24.50
   3  -2  -1  340.24   12.82
   2  -2  -1   34.24    3.41
   2   2   1 1430.39   29.22
   2   2   1 1473.50   32.06
   3   2   1 3329.41   65.49
   3   2   1 3245.75   60.66
   4   2   1  872.86   26.73
   4   2   1  809.14   23.61
   5   2   1  164.83   12.14
   5   2   1  170.10   11.40
  -5  -2  -1  164.85    8.02
   6   2   1   11.38    7.99
   6   2   1   32.21    8.74
  -6  -2  -1   20.72    5.36
  -7  -2  -1  363.84   14.55
   7   2   1  382.67   20.07
   7   2   1  417.88   23.03
  -8  -2  -1  755.86   23.91
   8   2   1  810.97   34.54
   8   2   1  905.31   33.13
   9   2   1  125.26   18.78
  10   2   1   -3.68   10.96
  11   2   1   68.97   19.31
  12   2   1  190.72   27.48
  13   2   1   38.94   18.41
  14   2   1   74.61   22.44
  15   2   1  -10.77   17.18
  16   2   1    6.66   18.84
  17   2   1  -28.47   16.18
  18  -3  -1   -0.68   20.12
  17  -3  -1   55.38   24.98
  16  -3  -1    7.86   17.16
  15  -3  -1   26.05   19.03
  14  -3  -1  200.83   28.75
  13  -3  -1   12.59   14.65
  12  -3  -1  246.82   25.15
  11  -3  -1  116.28   21.33
  10  -3  -1  717.04   34.66
   9  -3  -1  246.20   19.83
   8  -3  -1 2486.98   64.59
   7  -3  -1  161.76   14.53
   6  -3  -1  462.34   20.91
   5  -3  -1  276.82   14.73
   4  -3  -1  890.37   25.37
   3  -3  -1 1102.55   26.58
  -2   3   1  109.32    5.59
   1   3   1  589.51   14.95
   2   3   1    6.63    3.15
   2   3   1    4.41    2.72
   3   3   1  660.54   21.24
   3   3   1  686.53   18.71
  -4  -3  -1 1173.72   25.47
   4   3   1 1221.44   29.95
   4   3   1 1227.52   33.87
  -5  -3  -1   53.46    5.27
   5   3   1   45.26    9.24
   5   3   1   63.41    9.03
  -6  -3  -1  198.58    9.49
   6   3   1  197.87   15.21
   6   3   1  200.75   13.33
  -7  -3  -1  261.56   12.23
   7   3   1  293.03   17.62
   7   3   1  315.28   20.44
  -8  -3  -1 1186.11   30.54
   8   3   1 1202.99   43.06
   8   3   1 1191.35   38.99
   9   3   1  103.28   15.94
   9   3   1   76.95   16.16
  10   3   1  351.15   24.77
  11   3   1    8.91   14.04
  12   3   1   32.85   18.32
  13   3   1  -18.29   13.94
  14   3   1   68.15   22.19
  15   3   1  -26.97   14.73
  16   3   1   38.09   22.90
  17   3   1   62.42   24.60
  18   3   1   11.28   21.54
  18  -4  -1   33.75   22.71
  17  -4  -1   25.76   20.36
  16  -4  -1  221.56   33.38
  15  -4  -1   27.49   18.78
  14  -4  -1  248.27   31.64
  13  -4  -1    0.56   13.96
  12  -4  -1  333.14   27.51
  11  -4  -1  535.91   32.54
  10  -4  -1  143.08   20.38
   9  -4  -1  157.35   17.03
   8  -4  -1  159.50   16.21
   7  -4  -1  134.98   13.78
   6  -4  -1  425.66   20.18
   5  -4  -1  867.05   27.39
   4  -4  -1  348.15   14.79
   3  -4  -1 1197.72   28.23
  -2   4   1 2848.42   52.51
   0   4   1  435.13   11.15
   1   4   1   45.84    4.12
   1   4   1   45.42    3.52
   2   4   1   71.14    6.62
   2   4   1   71.39    4.99
   3   4   1 1202.20   31.18
   3   4   1 1204.20   27.13
  -3  -4  -1 1168.18   24.77
   4   4   1   14.66    4.98
  -4  -4  -1   13.20    3.60
   4   4   1   18.29    6.28
   5   4   1  441.05   17.39
   5   4   1  431.58   20.37
  -5  -4  -1  427.62   13.19
  -6  -4  -1    5.18    4.08
   6   4   1    5.87    7.66
   6   4   1   -1.10    5.43
   7   4   1  311.40   17.99
  -7  -4  -1  242.32   11.59
   7   4   1  229.18   18.12
  -8  -4  -1   78.56    9.83
   8   4   1  114.23   15.25
   8   4   1   63.16   14.50
   9   4   1    0.68    8.64
   9   4   1   -7.35    9.22
  10   4   1    9.20   11.87
  11   4   1   56.59   19.21
  12   4   1   45.78   19.16
  13   4   1   -4.99   15.03
  14   4   1  105.25   23.72
  15   4   1   47.53   20.77
  16   4   1  186.91   32.59
  17   4   1   13.89   22.28
  17  -5  -1   72.92   23.40
  16  -5  -1   38.53   20.22
  15  -5  -1  300.57   30.25
  14  -5  -1   29.46   18.34
  13  -5  -1  391.37   30.96
  12  -5  -1   48.06   17.39
  11  -5  -1  296.62   25.55
  10  -5  -1  102.62   17.33
   9  -5  -1   23.20   11.33
   8  -5  -1  266.14   19.76
   7  -5  -1  193.27   16.44
   6  -5  -1  176.75   13.47
   5  -5  -1  692.01   24.02
   4  -5  -1   57.38    7.82
  -3   5   1  691.84   19.59
  -2   5   1  479.10   13.91
  -1   5   1 1748.08   33.89
   0   5   1  149.97    6.37
   0   5   1  142.16    6.07
   1   5   1  445.73   12.08
   1   5   1  460.10   13.72
   2   5   1 2593.93   52.55
   2   5   1 2634.39   47.72
   3   5   1 3593.41   64.46
   3   5   1 3600.52   71.23
  -3  -5  -1 3509.00   65.02
   4   5   1  282.93   12.44
  -4  -5  -1  278.10    9.92
   4   5   1  278.84   15.08
   5   5   1   57.22    8.60
   5   5   1   47.66    9.76
  -5  -5  -1   55.06    5.33
   6   5   1  372.44   17.50
  -6  -5  -1  367.37   13.23
   6   5   1  371.51   20.87
   7   5   1    6.65    8.94
   7   5   1    1.70    7.14
  -7  -5  -1   -4.89    4.43
   8   5   1   52.62   11.76
   8   5   1   75.35   13.23
  -8  -5  -1   74.79    9.30
   9   5   1    7.10   10.48
   9   5   1   10.70    8.95
  10   5   1   71.76   17.89
  11   5   1  219.33   23.63
  12   5   1  177.15   27.39
  13   5   1   17.73   15.45
  14   5   1   24.19   19.14
  15   5   1  213.15   32.53
  16   5   1   30.05   20.05
  17   5   1   57.24   24.07
  15  -6  -1   18.23   17.95
  14  -6  -1   18.17   16.82
  13  -6  -1  194.73   27.72
  12  -6  -1   28.99   14.82
  11  -6  -1 1380.91   52.22
  10  -6  -1  242.03   21.97
   9  -6  -1  628.34   30.62
   8  -6  -1   83.01   14.38
   7  -6  -1 2783.70   66.97
   6  -6  -1   -2.14    5.76
  -4   6   1  142.17    9.65
  -3   6   1  188.71    9.79
  -2   6   1   54.93    5.39
  -1   6   1 1043.07   23.23
   0   6   1 1870.95   36.45
   0   6   1 1846.27   35.62
   1   6   1 1905.57   39.36
   1   6   1 1937.37   36.63
   2   6   1  191.88    8.37
   2   6   1  183.37   10.41
  -3  -6  -1  808.24   19.84
   3   6   1  807.06   20.69
   3   6   1  823.22   25.20
   4   6   1  224.83   13.92
  -4  -6  -1  206.05    8.95
   4   6   1  230.69   11.15
  -5  -6  -1  526.90   15.88
   5   6   1  523.34   22.99
   5   6   1  557.69   19.57
  -6  -6  -1    4.90    4.45
   6   6   1    1.83    5.46
   6   6   1    2.65    7.21
   7   6   1 1126.71   34.16
  -7  -6  -1 1002.12   26.56
   7   6   1  996.50   37.30
  -8  -6  -1  409.08   15.94
   8   6   1  410.79   21.50
   8   6   1  424.35   25.76
   9   6   1   -3.37    8.23
   9   6   1   -5.59    9.59
  10   6   1   22.87   11.87
  10   6   1   25.50   13.99
  11   6   1  539.75   34.14
  12   6   1  -10.72   13.00
  13   6   1  141.79   26.72
  14   6   1    1.79   16.62
  15   6   1    4.46   16.89
  16   6   1   45.50   22.90
  17   6   1   34.13   23.25
 -17   7   1 1410.10  238.67
 -16   7   1  194.67   94.83
  14  -7  -1   22.56   17.43
  13  -7  -1  171.36   25.97
  12  -7  -1  537.51   33.21
  11  -7  -1  859.28   40.42
  10  -7  -1  555.22   30.94
   9  -7  -1   69.03   14.62
   8  -7  -1 2065.83   57.19
   7  -7  -1  101.62   14.46
  -6   7   1  108.32   11.72
  -5   7   1   98.43    9.94
  -4   7   1   26.88    6.46
  -3   7   1 3107.71   60.59
  -2   7   1  947.47   23.23
  -1   7   1 6392.51  110.33
   0   7   1 7635.49  124.27
   0   7   1 7362.92  127.75
   1   7   1  251.15    9.61
   1   7   1  243.06   10.85
   2   7   1  210.80    9.02
   2   7   1  201.04   11.08
  -3  -7  -1 1682.49   35.58
   3   7   1 1696.33   41.31
   3   7   1 1685.29   35.08
  -4  -7  -1  180.05    8.82
   4   7   1  173.05    9.50
   4   7   1  198.00   13.34
   5   7   1   90.04    8.58
  -5  -7  -1   93.72    7.15
   5   7   1  111.52   11.74
   6   7   1   -3.87    6.41
   6   7   1   -4.64    4.88
  -6  -7  -1    3.17    4.54
   7   7   1   20.09    8.53
   7   7   1    5.90    9.34
   8   7   1   63.61   11.77
   8   7   1   64.13   13.19
  -8  -7  -1   76.74    9.30
   9   7   1   69.55   13.89
   9   7   1   38.36   13.83
  10   7   1   54.24   13.80
  10   7   1   48.13   15.93
  11   7   1  260.33   25.34
  12   7   1   32.25   17.24
  13   7   1   17.79   17.42
  14   7   1   10.88   16.71
  15   7   1  158.06   30.38
  16   7   1    8.80   18.73
  17   7   1  134.58   30.93
 -17   8   1  176.92  128.26
 -16   8   1  994.23  104.31
 -15   8   1   32.78   48.18
 -14   8   1  349.63   56.42
  -8   8   1  472.04   25.66
  -7   8   1  128.72   13.85
  -6   8   1   51.50   10.33
  -5   8   1  866.35   27.66
  -4   8   1   83.58    8.19
  -3   8   1  168.76    9.78
  -2   8   1  522.86   16.41
  -1   8   1  302.55   11.55
   0   8   1  250.87   10.15
   1   8   1   60.88    7.14
   1   8   1   53.76    6.19
   2   8   1 1544.15   37.53
   2   8   1 1643.52   33.10
   3   8   1   39.19    7.97
   3   8   1   60.52    7.01
  -4  -8  -1  210.84    9.81
   4   8   1  210.33   13.50
   4   8   1  209.17   10.66
  -5  -8  -1  854.06   23.13
   5   8   1  872.63   31.36
   5   8   1  878.00   25.34
  -6  -8  -1  127.53    9.08
   6   8   1  152.52   14.80
   6   8   1  121.28   10.68
  -7  -8  -1  329.91   13.94
   7   8   1  275.34   20.36
   7   8   1  278.44   16.62
   8   8   1   -3.41    6.77
   8   8   1   -6.24    8.86
  -8  -8  -1   -1.43    5.41
   9   8   1  304.10   19.86
   9   8   1  310.30   24.04
  10   8   1   20.61   11.87
  10   8   1   20.44   13.91
  11   8   1   23.60   16.01
  12   8   1  102.48   23.22
  13   8   1    0.71   15.34
  14   8   1   52.64   21.46
  15   8   1   26.91   20.97
  16   8   1   53.61   24.06
  17   8   1   -3.78   19.68
 -18   9   1 -260.50  210.71
 -17   9   1   35.23   91.06
 -16   9   1   47.67   58.91
 -15   9   1  280.61   60.07
 -14   9   1   16.05   34.41
 -13   9   1   58.03   28.58
 -12   9   1 1040.57   53.41
 -11   9   1  159.70   26.61
 -10   9   1  438.49   29.09
  -9   9   1  -13.78    9.30
  -8   9   1  859.23   34.29
  -7   9   1  367.04   20.87
  -6   9   1  916.17   30.81
  -5   9   1  149.16   11.81
  -4   9   1  344.80   15.49
  -3   9   1  361.28   14.72
  -2   9   1  216.35   10.90
  -1   9   1   63.46    6.25
   0   9   1  596.28   17.76
   0   9   1  577.97   16.97
   1   9   1 1470.21   31.12
   1   9   1 1431.99   34.10
   2   9   1 2093.48   47.51
   2   9   1 2176.92   42.34
   3   9   1  440.35   18.98
   3   9   1  468.83   15.16
   4   9   1  176.90    9.92
   4   9   1  187.89   13.69
  -4  -9  -1  179.99    9.85
   5   9   1  302.26   14.28
   5   9   1  276.34   17.97
  -5  -9  -1  315.72   13.17
   6   9   1 2331.95   51.69
  -6  -9  -1 2235.67   48.33
   6   9   1 2227.53   59.98
   7   9   1   -6.15    8.09
   7   9   1   -2.84    6.13
  -7  -9  -1   -8.86    4.63
  -8  -9  -1  208.54   11.75
   8   9   1  192.21   15.04
   8   9   1  205.63   19.46
   9   9   1    4.97   10.80
   9   9   1    1.38    9.14
  10   9   1  126.21   21.97
  10   9   1  163.53   17.36
  11   9   1   32.91   14.12
  11   9   1   18.52   14.69
  12   9   1  303.97   28.22
  13   9   1    2.74   16.57
  14   9   1   24.59   20.47
  15   9   1  -10.98   15.17
  16   9   1   -4.32   20.17
  17   9   1  -12.20   20.34
 -18  10   1  113.72  133.00
 -17  10   1   61.90   64.30
 -16  10   1  241.78   60.35
 -15  10   1    0.29   35.14
 -14  10   1  -10.66   28.10
 -13  10   1  134.95   29.96
 -12  10   1   96.35   27.72
 -11  10   1  990.73   46.31
 -10  10   1  110.77   20.68
  -9  10   1  184.38   18.54
  -8  10   1    4.87    9.93
  -7  10   1 1364.45   42.06
  -6  10   1   50.37   10.59
  -5  10   1   45.51    9.22
  -4  10   1  238.41   13.32
  -3  10   1    3.66    4.55
  -2  10   1 1005.44   26.61
  -1  10   1  417.82   15.10
   0  10   1 1082.65   27.17
   0  10   1 1086.92   26.31
   1  10   1 2416.53   47.09
   1  10   1 2418.96   51.13
   2  10   1    5.82    4.21
   2  10   1    0.55    4.62
   3  10   1  273.97   11.77
   3  10   1  285.99   15.54
   4  10   1  209.83   14.98
   4  10   1  238.47   11.64
  -5 -10  -1  138.33    9.56
   5  10   1  123.35   13.35
   5  10   1  110.86    9.35
   6  10   1  288.86   15.82
   6  10   1  295.94   19.35
  -6 -10  -1  289.01   13.60
   7  10   1  121.67   11.85
   7  10   1  125.58   14.19
  -7 -10  -1  133.32   10.12
  -8 -10  -1    7.12    6.15
   8  10   1    9.22   10.81
   8  10   1    3.87    7.22
   9  10   1    7.21   11.69
   9  10   1   -2.07    9.48
  10  10   1  153.79   19.75
  10  10   1  159.12   23.41
  11  10   1  211.75   23.66
  12  10   1  150.70   26.01
  13  10   1   19.90   18.12
  14  10   1   77.62   22.43
  15  10   1   -5.91   19.36
  16  10   1   80.97   27.25
  17  10   1   21.60   23.08
 -18  11   1  -82.47  103.13
 -17  11   1  365.49   87.30
 -16  11   1  312.36   64.03
 -15  11   1  532.76   64.59
 -14  11   1   -7.52   26.24
 -13  11   1  316.59   40.01
 -12  11   1    3.57   18.72
 -11  11   1  403.95   31.26
 -10  11   1   -1.13   12.59
  -9  11   1   -3.68    9.88
  -8  11   1   58.19   13.50
  -7  11   1  123.17   16.03
  -6  11   1   38.76    9.94
  -5  11   1   13.89    7.47
  -4  11   1 1669.33   41.62
  -3  11   1 2083.77   46.89
  -2  11   1 1624.76   38.04
  -1  11   1 3547.01   68.96
   0  11   1 1070.08   26.77
   0  11   1 1045.69   27.61
   1  11   1   16.80    5.02
   1  11   1   24.30    6.29
   2  11   1   47.96    8.42
   2  11   1   40.69    6.85
   3  11   1 1406.30   31.99
   3  11   1 1352.07   38.21
   4  11   1 1030.72   34.36
   4  11   1 1085.61   27.67
  -5 -11  -1   65.71    7.58
   5  11   1   56.80    8.83
   5  11   1   67.16   12.93
   6  11   1  245.87   18.76
   6  11   1  244.42   14.43
  -6 -11  -1  228.41   12.61
   7  11   1  270.26   20.52
   7  11   1  286.99   16.58
  -7 -11  -1  270.71   13.95
   8  11   1  538.70   24.05
  -8 -11  -1  518.13   19.61
   8  11   1  509.71   29.39
   9  11   1   21.31   13.15
   9  11   1   -4.76    8.37
  10  11   1   67.69   15.52
  10  11   1   69.00   18.21
  11  11   1   85.98   21.55
  12  11   1   98.21   23.17
  13  11   1   94.93   24.12
  14  11   1    9.86   18.45
  15  11   1  112.84   28.13
  16  11   1    3.14   19.02
  17  11   1   36.93   26.17
 -17  12   1   -6.91   56.80
 -16  12   1  291.91   59.08
 -15  12   1  127.17   38.01
 -14  12   1   -2.92   24.89
 -13  12   1  259.40   35.81
 -12  12   1  211.21   30.84
 -11  12   1   16.64   19.20
 -10  12   1   -9.24   11.42
  -9  12   1  683.16   32.37
  -8  12   1  127.93   17.17
  -7  12   1  457.84   24.09
  -6  12   1    0.51    6.87
  -5  12   1 1090.34   33.43
  -4  12   1  298.51   15.80
  -3  12   1 1468.06   37.42
  -2  12   1   17.28    6.14
  -1  12   1 1090.15   29.06
  -1  12   1 1006.85   27.99
   0  12   1  269.69   12.96
   0  12   1  272.09   12.62
   1  12   1 1184.85   31.88
   1  12   1 1147.77   28.35
   2  12   1   80.93   10.70
   2  12   1   66.47    7.03
   3  12   1 1350.63   38.57
   3  12   1 1333.84   31.79
   4  12   1  154.80   14.19
   4  12   1  150.35   10.08
   5  12   1 1778.88   41.25
   5  12   1 1751.60   50.73
   6  12   1  792.86   33.21
   6  12   1  719.85   24.78
  -6 -12  -1  721.10   23.74
  -7 -12  -1  440.42   17.94
   7  12   1  422.66   19.76
   7  12   1  390.07   24.72
   8  12   1   10.50   11.08
  -8 -12  -1   14.00    7.17
   8  12   1   20.96    8.57
   9  12   1  849.74   40.05
   9  12   1  850.52   32.94
  10  12   1  -12.71   11.99
  11  12   1  201.76   22.70
  12  12   1  -13.72   13.71
  13  12   1   65.26   22.18
  14  12   1   -1.89   18.14
  15  12   1   24.43   20.75
  16  12   1   11.65   20.15
  17  12   1  -22.24   20.56
 -17  13   1   99.64   50.88
 -16  13   1   44.00   39.60
 -15  13   1   21.34   25.65
 -14  13   1   17.15   25.33
 -13  13   1  192.07   31.74
 -12  13   1   80.39   21.93
 -11  13   1   34.53   19.36
 -10  13   1  159.67   23.15
  -9  13   1   30.40   12.85
  -8  13   1  280.65   19.98
  -7  13   1  428.47   22.91
  -6  13   1  484.64   23.12
  -5  13   1   73.57   11.39
  -4  13   1  154.08   12.13
  -3  13   1   18.36    7.06
  -2  13   1  839.37   25.69
  -1  13   1  415.89   16.84
  -1  13   1  421.47   17.29
   0  13   1  463.54   17.37
   0  13   1  494.62   18.50
   1  13   1 3376.49   69.51
   1  13   1 3310.13   63.85
   2  13   1  753.53   26.25
   2  13   1  749.64   21.83
   3  13   1   33.00    6.95
   3  13   1   34.00    9.26
   4  13   1  356.94   15.40
   4  13   1  378.67   20.95
   5  13   1 1487.93   46.09
   5  13   1 1414.48   36.09
   6  13   1  295.82   21.09
   6  13   1  278.27   15.34
  -7 -13  -1   75.13   10.30
   7  13   1   54.17   14.29
   7  13   1   46.06    9.80
  -8 -13  -1  170.41   12.52
   8  13   1  176.25   22.56
   8  13   1  170.82   14.36
   9  13   1   41.24   14.68
   9  13   1   38.25   11.52
  10  13   1  187.07   20.79
  11  13   1    7.65   14.92
  12  13   1    6.17   15.24
  13  13   1  355.51   32.44
  14  13   1   13.71   18.42
  15  13   1    2.76   16.83
  16  13   1  -12.24   19.79
  17  13   1   22.22   25.36
 -17  14   1  -22.46   36.46
 -16  14   1  134.98   43.36
 -15  14   1   19.14   26.39
 -14  14   1  189.86   36.48
 -13  14   1   26.19   19.81
 -12  14   1   39.46   19.42
 -11  14   1    9.44   14.94
 -10  14   1   85.31   20.37
  -9  14   1  157.53   17.64
  -8  14   1  128.77   18.46
  -7  14   1   -3.49    8.13
  -6  14   1    0.96    8.29
  -5  14   1  304.68   18.08
  -4  14   1  339.14   17.97
  -3  14   1  202.33   13.45
  -2  14   1 1129.01   32.08
  -1  14   1   27.12    7.23
  -1  14   1   41.03    7.91
   0  14   1 1105.22   31.14
   0  14   1 1130.92   30.00
   1  14   1 2678.11   54.63
   1  14   1 2732.61   59.99
   2  14   1   11.32    7.42
   2  14   1   13.87    5.55
   3  14   1   10.87    8.56
   3  14   1   22.01    6.59
   4  14   1  794.50   24.18
   4  14   1  756.26   30.31
   5  14   1   77.88   10.87
   6  14   1   41.09   10.99
   6  14   1   24.44    8.10
   7  14   1  -14.28    8.32
   7  14   1    2.39    6.87
   8  14   1    5.42    7.69
   8  14   1    6.32   10.13
   9  14   1  283.61   24.78
  10  14   1   72.49   19.64
  11  14   1  -10.06   13.18
  12  14   1  152.02   27.53
  13  14   1  185.63   30.30
  14  14   1  122.36   27.89
  15  14   1   35.75   22.08
  16  14   1   15.50   22.95
  17  14   1   -1.27   24.79
 -17  15   1  -42.32   39.91
 -16  15   1   66.82   32.90
 -15  15   1   51.33   28.52
 -14  15   1   75.65   28.55
 -13  15   1    4.19   16.83
 -12  15   1   23.40   18.62
 -11  15   1   -1.83   15.08
 -10  15   1  282.97   24.33
  -9  15   1   82.76   17.25
  -8  15   1   63.40   14.20
  -7  15   1   44.10   11.93
  -6  15   1  857.71   32.16
  -5  15   1   -2.06    7.60
  -4  15   1  647.68   25.11
  -3  15   1  297.32   16.35
  -2  15   1 1570.22   40.49
  -1  15   1 1367.50   36.09
  -1  15   1 1322.14   36.08
   0  15   1  580.18   20.77
   0  15   1  591.66   22.00
   2  15   1  439.42   17.14
   2  15   1  414.31   20.35
   3  15   1   57.84    9.18
   3  15   1   46.49   11.26
   4  15   1  884.98   33.49
   4  15   1  864.91   26.04
   5  15   1    4.61    6.87
   5  15   1   13.88    9.77
   6  15   1  674.45   32.33
   6  15   1  707.16   24.58
   7  15   1  -11.40    8.37
   7  15   1    5.24    7.29
   8  15   1  502.40   23.15
   8  15   1  489.29   30.29
   9  15   1   38.15   14.79
  10  15   1  130.49   23.70
  11  15   1    7.47   14.75
  12  15   1   73.74   22.36
  13  15   1   35.86   20.52
  14  15   1   27.79   21.98
  15  15   1   -7.14   18.36
  16  15   1   32.99   24.42
 -17  16   1   -7.88   38.02
 -16  16   1   -2.92   27.50
 -15  16   1  163.23   36.93
 -14  16   1  301.96   39.93
 -13  16   1   -5.76   15.07
 -12  16   1    8.25   15.81
 -11  16   1  -21.29   12.89
 -10  16   1   71.23   17.95
  -9  16   1   78.70   16.54
  -8  16   1  -13.84    8.44
  -7  16   1   27.21   10.62
  -6  16   1  332.54   20.45
  -5  16   1  114.95   12.76
  -4  16   1   -4.74    6.55
  -3  16   1  553.07   22.77
  -2  16   1 1063.53   32.20
   0  16   1  218.87   14.13
   0  16   1  201.67   13.51
   2  16   1 2407.91   51.41
   2  16   1 2422.12   58.80
   3  16   1  242.82   17.06
   3  16   1  255.57   13.36
   4  16   1  652.87   22.52
   4  16   1  624.45   28.19
   5  16   1  974.97   29.32
   5  16   1 1029.47   38.77
   6  16   1  298.34   22.21
   6  16   1  285.29   16.08
   7  16   1  202.68   14.19
   7  16   1  191.00   19.71
   8  16   1  234.94   22.22
   9  16   1  204.15   22.54
  10  16   1   -1.15   14.58
  11  16   1   -7.27   14.64
  12  16   1   42.68   19.16
  13  16   1   37.68   21.19
  14  16   1  101.98   28.05
  15  16   1   -1.09   19.57
  16  16   1  150.29   33.80
 -17  17   1  112.52   37.69
 -16  17   1  -35.30   26.40
 -15  17   1   45.46   27.55
 -14  17   1   36.41   23.62
 -13  17   1  176.95   29.01
 -12  17   1   21.89   16.96
 -11  17   1  -14.09   12.71
 -10  17   1  154.49   24.02
  -9  17   1  111.86   19.09
  -8  17   1   42.30   13.31
  -7  17   1    7.78   10.34
  -6  17   1  398.99   22.69
  -5  17   1  849.84   31.75
  -4  17   1   49.88   11.02
  -3  17   1  223.83   15.01
  -2  17   1   21.74    8.46
  -1  17   1 1458.43   39.65
  -1  17   1 1375.77   38.64
   0  17   1  545.23   21.05
   0  17   1  519.24   21.94
   1  17   1 1656.40   45.28
   1  17   1 1745.00   41.42
   2  17   1   21.24    8.34
   3  17   1    3.32    6.05
   3  17   1    6.98    7.71
   4  17   1  708.32   23.90
   4  17   1  706.31   30.79
   5  17   1 1225.40   43.75
   5  17   1 1250.59   34.33
   6  17   1   63.30   10.95
   6  17   1   51.20   14.43
   7  17   1    2.99    6.83
   7  17   1   -4.35    7.76
   8  17   1   11.91   12.44
   9  17   1   34.11   15.88
  10  17   1   77.48   20.87
  11  17   1  -24.00   13.14
  12  17   1  280.75   29.64
  13  17   1  276.29   31.10
  14  17   1    4.96   20.33
  15  17   1   27.51   23.33
  16  17   1   20.17   25.13
 -17  18   1   23.22   36.66
 -16  18   1    2.82   29.06
 -15  18   1   -3.70   25.29
 -14  18   1  125.40   29.58
 -13  18   1   36.82   20.68
 -12  18   1   -3.35   14.20
 -11  18   1   42.87   18.91
 -10  18   1   38.51   16.80
  -9  18   1 1129.38   43.78
  -8  18   1  -10.74   10.04
  -7  18   1  413.54   24.02
  -6  18   1   93.84   15.18
  -5  18   1  214.91   17.55
  -4  18   1   -0.64    7.68
  -3  18   1  604.51   24.88
  -2  18   1   16.26    8.19
  -1  18   1  824.82   28.82
  -1  18   1  790.68   28.06
   0  18   1  561.79   22.26
   0  18   1  542.64   23.04
   2  18   1    9.06    7.58
   2  18   1   -3.28    5.41
   3  18   1  136.14   10.88
   3  18   1  154.87   14.73
   4  18   1   34.42   11.79
   4  18   1   44.16    9.37
   5  18   1  226.50   19.46
   5  18   1  188.36   13.38
   6  18   1    2.17    6.31
   6  18   1   -8.70    8.94
   7  18   1   -5.12    9.83
   8  18   1   -2.16   11.95
   9  18   1  909.51   44.50
  10  18   1   63.56   20.14
  11  18   1  121.06   25.47
  12  18   1   45.86   20.05
  13  18   1  321.06   33.09
  14  18   1   -0.02   20.19
  15  18   1   48.53   25.32
  16  18   1   25.69   25.53
 -16  19   1   14.53   29.24
 -15  19   1   21.21   26.79
 -14  19   1   13.52   22.90
 -13  19   1    8.13   18.68
 -12  19   1    6.19   16.25
 -11  19   1  211.97   27.30
 -10  19   1  595.08   34.07
  -9  19   1   38.08   15.91
  -8  19   1   81.36   16.66
  -7  19   1    4.72   10.18
  -6  19   1   69.98   13.73
  -5  19   1  351.94   21.28
  -4  19   1  220.44   16.78
  -3  19   1  256.45   16.95
  -2  19   1    3.75    7.63
  -1  19   1  158.45   13.23
  -1  19   1  162.41   13.65
   0  19   1  119.16   11.81
   1  19   1  297.12   18.29
   1  19   1  301.69   16.02
   2  19   1   60.34    9.98
   2  19   1   72.50   13.08
   3  19   1  449.00   24.13
   3  19   1  454.23   19.44
   4  19   1   65.40   10.62
   4  19   1   87.28   15.23
   5  19   1   56.47   14.70
   5  19   1   46.59   10.13
   6  19   1   19.81    8.52
   6  19   1   28.89   13.37
   7  19   1   62.04   16.56
   8  19   1   39.71   16.37
   9  19   1   46.95   15.49
  10  19   1   50.08   19.70
  11  19   1   19.48   16.90
  12  19   1   63.01   22.54
  13  19   1   56.65   24.91
  14  19   1   11.55   22.19
  15  19   1   57.08   26.45
  16  19   1   68.33   28.56
 -16  20   1  115.81   29.67
 -15  20   1   -9.06   21.93
 -14  20   1   85.84   27.58
 -13  20   1   64.65   22.65
 -12  20   1   -2.65   15.68
 -11  20   1   27.98   16.62
 -10  20   1  259.70   24.35
  -9  20   1   61.47   18.19
  -8  20   1  108.63   18.81
  -7  20   1    5.97   11.05
  -6  20   1  519.42   27.00
  -5  20   1   73.62   14.57
  -4  20   1  540.33   25.38
  -3  20   1   12.76    9.61
  -2  20   1  492.06   22.97
  -2  20   1  465.24   23.82
  -1  20   1  164.54   18.16
  -1  20   1  149.69   13.59
   0  20   1    6.18    7.41
   0  20   1    5.71    7.44
   1  20   1   25.73    7.89
   1  20   1   37.85   10.39
   2  20   1  345.45   17.35
   2  20   1  338.26   20.72
   3  20   1  107.78   15.84
   3  20   1   94.52   12.11
   4  20   1  211.43   14.40
   4  20   1  245.22   19.65
   5  20   1   -0.24   10.02
   5  20   1    0.85    7.01
   6  20   1  100.83   18.72
   7  20   1   36.60   15.35
   8  20   1  445.82   31.37
   9  20   1   53.18   17.49
  10  20   1   38.53   17.69
  11  20   1  148.23   26.87
  12  20   1   31.36   19.97
  13  20   1   70.28   26.90
  14  20   1   91.23   28.24
  15  20   1   15.65   22.14
  16  20   1  163.94   34.72
 -16  21   1   52.39   29.48
 -15  21   1   37.09   20.89
 -14  21   1  -34.90   18.02
 -13  21   1   14.29   18.79
 -12  21   1  166.79   26.85
 -11  21   1    2.75   15.41
 -10  21   1  267.50   25.20
  -9  21   1  -10.17   12.42
  -8  21   1  104.69   19.32
  -7  21   1   20.47   13.28
  -6  21   1  559.57   28.40
  -5  21   1  388.57   22.79
  -4  21   1   36.93   11.78
  -3  21   1   26.77   10.53
  -2  21   1  150.73   15.10
  -2  21   1  177.61   14.88
  -1  21   1   37.07   10.48
  -1  21   1   30.77   11.26
   0  21   1  104.04   13.26
   0  21   1  123.83   15.24
   1  21   1   16.60    8.11
   1  21   1   26.73   11.23
   2  21   1  438.20   20.05
   2  21   1  483.60   25.10
   3  21   1   57.83   10.96
   3  21   1   61.76   14.18
   4  21   1  598.78   23.51
   4  21   1  617.37   30.90
   5  21   1   -5.58    7.22
   5  21   1   -4.23   10.30
   6  21   1  401.83   27.55
   7  21   1   44.67   16.55
   8  21   1  176.41   25.99
   9  21   1   -1.80   11.01
  10  21   1  258.05   27.38
  11  21   1  -11.25   15.03
  12  21   1  410.63   35.82
  13  21   1   19.75   22.28
  14  21   1  -18.80   18.72
  15  21   1  -18.05   21.13
 -16  22   1  114.91   36.38
 -15  22   1    1.99   21.85
 -14  22   1  -22.27   19.90
 -13  22   1   77.19   23.67
 -12  22   1    2.48   16.42
 -11  22   1   25.30   17.59
 -10  22   1   92.63   21.29
  -9  22   1  224.32   22.96
  -8  22   1   56.72   18.53
  -7  22   1  276.77   22.22
  -6  22   1  159.11   17.11
  -5  22   1   22.87   10.98
  -4  22   1   -7.80    8.74
  -3  22   1  130.02   17.27
  -2  22   1  363.89   21.89
  -2  22   1  345.11   20.26
  -1  22   1  164.73   18.29
  -1  22   1  117.44   13.02
   0  22   1   24.33    8.85
   0  22   1   13.33    8.80
   1  22   1    5.27    7.65
   1  22   1   11.29    9.26
   2  22   1  988.86   37.54
   2  22   1  979.39   31.43
   3  22   1   52.11   10.82
   3  22   1   65.35   15.01
   4  22   1  512.39   22.12
   4  22   1  495.34   28.24
   5  22   1   -2.05   10.18
   6  22   1   32.36   14.95
   7  22   1    4.10   12.61
   8  22   1   61.20   19.97
   9  22   1  217.62   29.85
  10  22   1   27.45   19.48
  11  22   1   92.27   25.84
  12  22   1   32.06   20.37
  13  22   1   50.42   23.91
  14  22   1   11.91   20.82
  15  22   1    2.61   23.45
 -16  23   1  -29.67   25.94
 -15  23   1   15.23   24.93
 -14  23   1  -13.95   18.86
 -13  23   1  -12.14   16.05
 -12  23   1   45.87   20.75
 -11  23   1   47.12   19.45
 -10  23   1   16.20   15.18
  -9  23   1   -2.53   13.31
  -8  23   1    1.98   14.49
  -7  23   1   -8.50   11.89
  -6  23   1    2.56   11.62
  -5  23   1   47.64   13.40
  -4  23   1    9.43   10.64
  -3  23   1  310.86   20.46
  -2  23   1  152.89   19.04
  -2  23   1  146.32   17.07
  -1  23   1  171.24   15.23
  -1  23   1  147.43   14.53
   0  23   1  132.75   14.36
   0  23   1  158.28   17.25
   1  23   1  655.40   29.84
   1  23   1  665.32   26.31
   2  23   1  120.44   17.78
   2  23   1  121.08   13.17
   3  23   1 1063.83   41.57
   3  23   1 1145.25   34.82
   4  23   1  129.44   12.88
   4  23   1  171.31   21.79
   5  23   1  162.99   22.66
   6  23   1  105.04   20.08
   7  23   1   48.63   16.18
   8  23   1  336.69   29.21
   9  23   1   27.69   18.29
  10  23   1    3.25   18.29
  11  23   1   62.62   24.44
  12  23   1   19.64   20.95
  13  23   1   43.32   23.79
  14  23   1  -18.28   18.35
  15  23   1   29.12   26.33
 -15  24   1  -38.10   21.96
 -14  24   1   -7.82   16.80
 -13  24   1   98.88   24.13
 -12  24   1   -6.06   16.07
 -11  24   1   36.54   18.20
 -10  24   1   68.97   19.97
  -9  24   1   61.76   18.90
  -8  24   1  -12.38   13.86
  -7  24   1  202.21   24.81
  -6  24   1    0.03   12.21
  -5  24   1  160.18   20.47
  -4  24   1  204.93   18.01
  -3  24   1  106.04   17.36
  -3  24   1   67.90   14.83
  -2  24   1  171.61   16.26
  -2  24   1  171.25   17.24
  -1  24   1  162.82   15.43
  -1  24   1  166.07   15.59
   0  24   1  213.90   16.18
   0  24   1  200.66   17.11
   1  24   1   73.03   14.77
   1  24   1   50.02   11.32
   2  24   1  105.99   15.13
   2  24   1  125.76   18.49
   3  24   1   15.56   10.71
   3  24   1   22.55    9.64
   4  24   1   15.75    9.55
   4  24   1   10.35   11.48
   5  24   1  142.28   21.61
   6  24   1   50.26   16.82
   7  24   1  524.39   34.23
   8  24   1  111.39   23.04
   9  24   1  268.72   33.95
  10  24   1    9.97   18.61
  11  24   1  182.69   31.80
  12  24   1   -6.76   19.18
  13  24   1   23.18   22.35
  14  24   1  -37.05   20.15
  15  24   1  -19.56   23.68
 -15  25   1   22.42   24.41
 -14  25   1  -11.43   17.26
 -13  25   1   15.78   18.54
 -12  25   1  165.87   27.94
 -11  25   1  -27.52   14.28
 -10  25   1   18.09   15.90
  -9  25   1   80.16   20.46
  -8  25   1  -28.85   11.93
  -7  25   1   11.84   14.20
  -6  25   1  291.02   23.00
  -5  25   1   -8.60   10.58
  -4  25   1   15.95   11.38
  -3  25   1   42.42   13.66
  -3  25   1   22.72   11.62
  -2  25   1  263.25   20.83
  -2  25   1  245.70   18.99
  -1  25   1  211.08   18.21
  -1  25   1  218.71   17.64
   0  25   1   55.29   12.69
   0  25   1   73.05   14.84
   1  25   1  716.81   32.56
   1  25   1  710.64   28.41
   2  25   1   31.57   10.66
   3  25   1  161.65   18.41
   3  25   1  161.51   14.72
   4  25   1   37.17   14.48
   5  25   1  335.05   26.26
   6  25   1  181.49   25.91
   7  25   1   68.05   20.13
   8  25   1  108.42   23.76
   9  25   1  118.78   26.68
  10  25   1   36.80   19.60
  11  25   1   22.65   19.39
  12  25   1   60.20   25.70
  13  25   1   41.27   25.23
  14  25   1   -7.73   22.66
 -15  26   1   -3.03   18.69
 -14  26   1   17.65   21.24
 -13  26   1    9.13   18.41
 -12  26   1    7.46   16.73
 -11  26   1   17.16   19.27
 -10  26   1   53.08   19.16
  -9  26   1   61.30   19.43
  -8  26   1   78.77   19.64
  -7  26   1   69.73   19.10
  -6  26   1   10.35   14.12
  -5  26   1  -12.35   11.19
  -4  26   1    4.87   11.85
  -3  26   1    5.25   10.19
  -3  26   1   -1.56   10.57
  -2  26   1  426.20   24.75
  -2  26   1  425.24   25.81
  -1  26   1    0.04    9.35
  -1  26   1    6.62    9.67
   0  26   1   30.54   12.51
   0  26   1   19.44   10.71
   1  26   1   42.02   14.14
   1  26   1   39.11   11.85
   2  26   1 1079.51   42.81
   2  26   1 1116.26   36.38
   3  26   1  153.07   14.62
   3  26   1  129.15   20.70
   4  26   1  165.28   22.95
   5  26   1   33.72   14.81
   6  26   1   34.49   16.83
   7  26   1  -11.73   13.63
   8  26   1   14.91   16.35
   9  26   1   29.76   20.13
  10  26   1  109.49   27.06
  11  26   1  -24.84   16.97
  12  26   1   21.69   20.55
  13  26   1   18.82   24.11
  14  26   1   41.07   27.95
 -15  27   1   44.39   26.36
 -14  27   1   12.24   22.05
 -13  27   1   18.56   20.86
 -12  27   1   90.72   23.44
 -11  27   1   -4.14   18.00
 -10  27   1   76.25   22.00
  -9  27   1  -13.75   13.39
  -8  27   1  237.99   23.24
  -7  27   1   12.78   15.77
  -6  27   1  297.45   24.37
  -5  27   1  102.26   20.48
  -4  27   1   78.17   16.96
  -3  27   1   18.41   13.04
  -3  27   1   36.63   13.21
  -2  27   1  183.98   20.83
  -2  27   1  178.41   21.96
  -1  27   1    3.69    9.64
  -1  27   1   -3.25   10.02
   0  27   1   71.11   15.50
   0  27   1   48.44   13.29
   1  27   1   57.08   15.08
   1  27   1   51.44   13.02
   2  27   1  155.32   15.20
   2  27   1  104.32   18.19
   3  27   1   73.81   17.67
   4  27   1  263.48   23.76
   5  27   1   -0.28   12.63
   6  27   1  122.50   23.33
   7  27   1   -5.69   15.58
   8  27   1  333.65   30.98
   9  27   1   11.29   19.22
  10  27   1  196.63   32.96
  11  27   1   -5.32   20.22
  12  27   1   40.72   24.74
  13  27   1    1.19   21.19
  14  27   1   47.90   26.93
 -14  28   1   78.29   26.62
 -13  28   1   61.16   24.00
 -12  28   1   69.07   23.44
 -11  28   1  -15.66   16.67
 -10  28   1   -1.74   16.84
  -9  28   1   36.63   18.49
  -8  28   1  110.20   22.23
  -7  28   1   26.13   16.40
  -6  28   1   71.64   18.72
  -5  28   1   96.26   20.16
  -4  28   1  136.88   21.56
  -4  28   1  140.72   21.26
  -3  28   1   40.27   15.42
  -3  28   1   74.44   16.63
  -2  28   1   53.22   15.06
  -2  28   1   78.74   16.90
  -1  28   1   83.95   17.16
  -1  28   1   98.52   16.76
   0  28   1  294.92   22.39
   0  28   1  275.67   19.59
   1  28   1   50.61   15.54
   1  28   1    9.67   10.25
   2  28   1  187.12   23.20
   2  28   1  141.44   15.42
   3  28   1   28.93   14.72
   4  28   1   19.95   14.77
   5  28   1   48.30   17.87
   6  28   1  132.59   24.78
   7  28   1  142.20   27.34
   8  28   1  127.84   26.55
   9  28   1  278.82   35.88
  10  28   1   37.38   21.51
  11  28   1   89.72   26.42
  12  28   1   12.65   22.72
  13  28   1   47.79   26.45
  14  28   1   92.81   31.12
 -14  29   1   -1.23   19.11
 -13  29   1   35.56   21.23
 -12  29   1    7.44   19.10
 -11  29   1   -4.50   17.79
 -10  29   1   81.11   22.99
  -9  29   1   12.60   16.42
  -8  29   1  223.38   28.10
  -7  29   1   25.66   15.47
  -6  29   1   -4.25   14.00
  -5  29   1   65.56   17.99
  -4  29   1   43.22   15.92
  -4  29   1   31.40   15.88
  -3  29   1   46.96   15.79
  -3  29   1   63.45   16.96
  -2  29   1   78.97   17.63
  -2  29   1   82.21   17.39
  -1  29   1   37.34   13.76
  -1  29   1   62.43   16.02
   0  29   1   34.70   14.25
   0  29   1   34.12   12.41
   1  29   1  416.52   23.73
   1  29   1  456.58   28.44
   2  29   1   27.51   14.69
   3  29   1  194.37   25.54
   4  29   1  191.86   26.46
   5  29   1  445.11   31.99
   6  29   1    5.65   15.59
   7  29   1   -2.26   14.93
   8  29   1   -6.86   17.27
   9  29   1   -1.71   19.09
  10  29   1   -0.81   19.52
  11  29   1   16.77   23.22
  12  29   1  -26.90   19.71
  13  29   1  102.65   31.14
 -14  30   1  -23.42   20.60
 -13  30   1   -0.44   17.55
 -12  30   1   47.83   23.38
 -11  30   1  134.01   26.69
 -10  30   1    6.17   16.74
  -9  30   1  262.11   26.83
  -8  30   1   23.75   17.66
  -7  30   1  150.55   24.03
  -6  30   1   34.10   17.02
  -5  30   1  168.27   26.51
  -5  30   1  197.13   21.32
  -4  30   1   39.99   16.90
  -4  30   1   42.07   15.68
  -3  30   1  -14.07   12.26
  -3  30   1    0.19   12.83
  -2  30   1    4.41   11.21
  -2  30   1    2.96   12.15
  -1  30   1   18.77   12.38
  -1  30   1   54.41   16.34
   0  30   1   23.16   14.01
   0  30   1    6.70   11.83
   1  30   1   32.09   13.17
   1  30   1   23.17   14.03
   2  30   1   -8.20   12.33
   3  30   1   78.64   21.06
   4  30   1  186.51   26.58
   5  30   1  154.53   25.55
   6  30   1    8.65   15.15
   7  30   1  148.45   27.91
   8  30   1    0.31   19.23
   9  30   1  144.96   29.91
  10  30   1   13.41   20.33
  11  30   1   44.03   24.44
  12  30   1    6.75   21.70
  13  30   1  116.08   33.75
 -13  31   1  119.26   30.62
 -12  31   1    1.12   17.30
 -11  31   1   25.74   18.56
 -10  31   1   77.64   23.14
  -9  31   1   13.25   17.71
  -8  31   1   45.47   19.15
  -7  31   1  170.22   25.62
  -6  31   1   53.03   18.39
  -5  31   1  189.90   21.23
  -5  31   1  192.84   28.00
  -4  31   1  115.23   20.95
  -4  31   1   86.88   20.85
  -3  31   1  137.58   22.26
  -3  31   1  159.60   24.34
  -2  31   1   -5.60   10.92
  -2  31   1   -0.79   12.08
  -1  31   1  117.27   19.45
  -1  31   1   87.88   19.03
   0  31   1   38.87   16.11
   0  31   1   23.99   13.92
   1  31   1   78.10   18.72
   2  31   1  -25.03   11.58
   3  31   1   48.73   17.64
   4  31   1   10.50   15.75
   5  31   1    9.69   15.19
   6  31   1   47.45   20.48
   7  31   1   26.32   19.94
   8  31   1  110.21   27.84
   9  31   1   38.55   22.08
  10  31   1   98.07   26.90
  11  31   1    3.63   23.34
  12  31   1   15.56   24.95
  13  31   1  -16.55   21.42
 -13  32   1  -51.14   19.27
 -12  32   1   59.93   23.03
 -11  32   1  157.81   29.37
 -10  32   1   11.30   18.75
  -9  32   1    9.71   18.14
  -8  32   1   19.82   18.38
  -7  32   1    1.95   15.58
  -6  32   1  103.74   22.35
  -6  32   1  128.00   26.16
  -5  32   1   35.85   17.32
  -5  32   1   30.87   18.69
  -4  32   1  239.64   22.94
  -4  32   1  214.99   23.59
  -3  32   1   45.67   16.83
  -3  32   1   39.02   17.07
  -2  32   1    3.71   12.87
  -2  32   1   -9.52   12.76
  -1  32   1   35.01   15.06
  -1  32   1   44.06   16.59
   0  32   1  212.22   20.23
   0  32   1  220.28   22.46
   1  32   1  197.95   25.92
   2  32   1    7.53   15.11
   3  32   1    3.72   14.80
   4  32   1   27.64   18.22
   5  32   1   -1.28   13.80
   6  32   1  173.97   29.47
   7  32   1   46.26   22.33
   8  32   1    8.13   19.46
   9  32   1    1.09   19.71
  10  32   1   29.12   24.00
  11  32   1   21.79   23.22
  12  32   1   34.07   24.47
 -12  33   1  150.87   31.35
 -11  33   1    7.58   19.69
 -10  33   1  123.45   26.47
  -9  33   1   -7.73   15.70
  -8  33   1  318.06   28.96
  -7  33   1    9.67   16.48
  -6  33   1   53.07   19.10
  -6  33   1   64.38   22.48
  -5  33   1    0.96   15.12
  -5  33   1   11.52   15.71
  -4  33   1  132.46   24.95
  -4  33   1  150.44   23.49
  -3  33   1   92.39   21.19
  -3  33   1  123.32   22.29
  -2  33   1  -19.81   11.64
  -2  33   1   -9.81   12.93
  -1  33   1   -2.07   14.66
  -1  33   1    5.56   12.99
   0  33   1   28.40   15.81
   1  33   1   18.76   15.41
   2  33   1   19.83   15.43
   3  33   1   -0.87   15.53
   4  33   1  155.28   26.51
   5  33   1  100.30   23.55
   6  33   1   28.86   20.89
   7  33   1  -12.43   19.32
   8  33   1   78.29   25.13
   9  33   1  -13.67   19.64
  10  33   1  105.62   30.44
  11  33   1   13.34   21.30
  12  33   1   19.38   24.87
 -12  34   1   92.53   27.49
 -11  34   1   14.85   18.95
 -10  34   1   -4.83   17.75
  -9  34   1  177.88   29.12
  -8  34   1   44.55   20.37
  -7  34   1   87.57   26.02
  -7  34   1   91.38   23.45
  -6  34   1   24.60   19.00
  -6  34   1   27.81   18.14
  -5  34   1   95.13   21.87
  -5  34   1   58.25   22.31
  -4  34   1  291.11   26.03
  -4  34   1  292.24   28.15
  -3  34   1   62.28   19.17
  -3  34   1   22.40   16.76
  -2  34   1  180.54   25.84
  -2  34   1  196.96   21.99
  -1  34   1   13.67   14.71
  -1  34   1    4.01   14.03
   0  34   1   45.48   18.67
   1  34   1   -3.03   15.12
   2  34   1  135.53   24.09
   3  34   1   -7.06   13.75
   4  34   1   14.53   18.23
   5  34   1   -0.56   16.85
   6  34   1    1.26   18.17
   7  34   1    4.75   18.41
   8  34   1   -5.31   20.69
   9  34   1   49.90   27.78
  10  34   1  -13.42   20.37
  11  34   1   22.28   24.98
 -12  35   1   92.85   25.48
 -11  35   1   50.94   24.57
 -10  35   1  -12.76   17.67
  -9  35   1   21.45   18.81
  -8  35   1  -18.84   17.02
  -8  35   1    9.90   17.84
  -7  35   1   60.71   20.79
  -7  35   1   55.97   22.84
  -6  35   1  -13.80   15.79
  -6  35   1  -11.66   14.67
  -5  35   1   22.10   17.23
  -5  35   1    2.98   14.96
  -4  35   1   42.59   18.97
  -4  35   1   50.59   20.60
  -3  35   1  386.17   29.00
  -3  35   1  321.00   27.90
  -2  35   1   33.50   17.24
  -2  35   1   51.99   19.08
  -1  35   1  123.97   23.59
   0  35   1   41.57   18.62
   1  35   1   28.08   18.40
   2  35   1   23.14   18.19
   3  35   1  153.45   27.89
   4  35   1   80.63   24.13
   5  35   1  -13.19   15.30
   6  35   1   10.84   20.65
   7  35   1  142.25   30.24
   8  35   1  -17.84   18.20
   9  35   1  -30.81   18.42
  10  35   1   -9.67   22.31
  11  35   1   32.01   26.65
 -11  36   1  141.12   30.10
 -10  36   1   -0.64   20.01
  -9  36   1   23.84   20.84
  -8  36   1   -4.93   18.13
  -8  36   1  -11.06   17.13
  -7  36   1   88.57   25.36
  -7  36   1  125.86   26.03
  -6  36   1   -6.50   16.40
  -6  36   1  -21.69   13.74
  -5  36   1  206.70   29.57
  -5  36   1  188.79   30.76
  -4  36   1   28.14   16.52
  -4  36   1   18.94   16.73
  -3  36   1   44.15   19.48
  -3  36   1   41.77   19.36
  -2  36   1    6.68   15.42
  -2  36   1   10.08   15.38
  -1  36   1  225.11   29.49
   0  36   1    1.76   17.66
   1  36   1  110.94   24.75
   2  36   1  -10.41   16.88
   3  36   1   38.80   20.77
   4  36   1    5.41   18.85
   5  36   1  100.41   27.41
   6  36   1    7.09   20.59
   7  36   1  263.77   37.30
   8  36   1   -5.99   20.28
   9  36   1  -20.59   19.19
  10  36   1   -3.20   24.85
  11  36   1   82.49   29.33
 -10  37   1  -15.22   18.98
  -9  37   1  -15.46   17.88
  -9  37   1   -8.94   20.15
  -8  37   1   34.09   20.30
  -8  37   1   42.61   24.47
  -7  37   1   31.34   18.99
  -7  37   1   32.44   21.86
  -6  37   1   18.30   19.18
  -6  37   1   20.77   19.91
  -5  37   1    2.63   17.34
  -5  37   1   17.42   17.66
  -4  37   1   27.95   19.04
  -4  37   1   82.57   22.74
  -3  37   1  185.97   28.82
  -3  37   1  161.76   26.64
  -2  37   1   41.70   19.08
  -1  37   1   95.30   23.86
   0  37   1   -8.38   16.33
   1  37   1   85.86   24.76
   2  37   1   -2.34   18.31
   3  37   1  170.90   29.14
   4  37   1   38.22   21.20
   5  37   1   -2.46   19.34
   6  37   1  104.26   28.57
   7  37   1   14.54   21.41
   8  37   1   51.88   26.18
   9  37   1  -20.53   21.70
  10  37   1  -13.49   24.57
 -10  38   1    4.28   21.27
 -10  38   1  -23.77   20.10
  -9  38   1  -17.46   18.44
  -9  38   1   -2.64   18.27
  -8  38   1  -10.18   18.20
  -8  38   1    1.34   19.52
  -7  38   1    0.16   15.98
  -7  38   1   17.63   18.09
  -6  38   1    6.97   18.17
  -6  38   1    8.23   18.52
  -5  38   1   -1.73   16.85
  -5  38   1  -18.85   16.10
  -4  38   1   63.48   22.10
  -4  38   1   95.71   23.39
  -3  38   1    4.49   16.90
  -3  38   1   12.67   18.08
  -2  38   1  173.61   28.91
  -1  38   1   19.22   17.91
   0  38   1  118.54   26.22
   1  38   1   24.33   19.82
   2  38   1  224.74   34.22
   3  38   1   69.19   23.60
   4  38   1   61.52   23.73
   5  38   1   -7.93   20.44
   6  38   1   63.71   24.94
   7  38   1   14.37   22.30
   8  38   1    3.96   22.36
   9  38   1  -54.39   20.45
  10  38   1    6.55   25.73
  -9  39   1  -35.36   17.78
  -9  39   1   -4.50   19.84
  -8  39   1   92.16   24.88
  -8  39   1   42.76   23.97
  -7  39   1   -8.84   18.09
  -7  39   1   16.51   19.91
  -6  39   1   41.50   20.79
  -6  39   1   51.76   23.28
  -5  39   1    7.67   19.14
  -5  39   1   17.22   19.70
  -4  39   1   74.09   23.00
  -4  39   1   82.82   23.71
  -3  39   1   34.13   19.75
  -2  39   1   51.64   22.39
  -1  39   1  -21.47   17.03
   0  39   1   10.73   18.13
   1  39   1   18.89   19.10
   2  39   1   36.56   21.83
   3  39   1   25.03   22.26
   4  39   1  135.18   29.95
   5  39   1    7.47   18.93
   6  39   1   75.51   25.10
   7  39   1   12.47   21.77
   8  39   1   47.44   26.43
   9  39   1   -4.88   24.12
  -9  40   1    5.23   23.31
  -9  40   1  -23.02   19.08
  -8  40   1   -6.35   18.24
  -8  40   1    8.66   20.12
  -7  40   1   35.44   22.31
  -7  40   1   33.72   23.16
  -6  40   1   40.49   22.09
  -6  40   1  -16.65   17.93
  -5  40   1    0.37   19.71
  -5  40   1   49.29   20.89
  -4  40   1   60.74   21.82
  -4  40   1   69.43   23.51
  -3  40   1   31.01   20.17
  -2  40   1   23.68   21.10
  -1  40   1   73.23   25.51
   0  40   1  121.05   29.54
   1  40   1   15.80   18.57
   2  40   1   45.73   24.16
   3  40   1   36.44   23.70
   4  40   1   15.17   19.02
   5  40   1   60.70   24.84
   6  40   1   37.05   25.38
   7  40   1  120.27   33.20
   8  40   1   19.74   24.23
  -8  41   1   32.47   23.14
  -8  41   1   28.04   22.11
  -7  41   1    1.85   20.82
  -7  41   1   25.04   22.04
  -6  41   1   10.04   19.66
  -6  41   1   -8.62   20.54
  -5  41   1   -4.04   19.45
  -5  41   1   20.26   20.44
  -4  41   1    3.09   16.85
  -3  41   1   81.85   24.32
  -2  41   1   37.82   22.80
  -1  41   1   98.10   26.77
   0  41   1    1.11   20.97
   1  41   1  126.20   28.41
   2  41   1   -3.67   19.15
   3  41   1  119.02   28.67
   4  41   1   -9.72   20.52
   5  41   1   19.38   21.89
   6  41   1  -13.62   20.36
   7  41   1    5.19   22.69
  -7  42   1   51.29   23.59
  -7  42   1   49.94   25.17
  -6  42   1   11.55   20.62
  -6  42   1    1.07   20.17
  -5  42   1   77.34   24.78
  -4  42   1    1.60   18.44
  -3  42   1    4.96   18.24
  -2  42   1    1.53   19.85
  -1  42   1   -3.49   19.35
   0  42   1   18.15   22.40
   1  42   1   34.91   21.66
   2  42   1    3.36   22.43
   3  42   1    0.50   21.33
   4  42   1    0.89   18.88
   5  42   1   39.28   24.10
   6  42   1   14.99   24.87
   7  42   1   17.76   26.15
  -6  43   1   25.41   22.85
  -5  43   1   47.55   24.48
  -4  43   1   58.01   24.71
  -3  43   1   36.49   22.80
  -2  43   1    2.32   21.67
  -1  43   1   74.94   25.82
   0  43   1   18.85   21.81
   1  43   1    1.21   19.27
   2  43   1  -17.75   19.26
   3  43   1   -1.85   20.69
   4  43   1   64.25   26.65
   5  43   1  -11.39   23.62
   6  43   1   10.01   24.40
  -5  44   1    5.51   20.91
  -4  44   1  110.01   29.33
  -3  44   1    2.01   22.33
  -2  44   1   67.70   25.81
  -1  44   1   24.32   22.09
   0  44   1   98.61   26.68
   1  44   1   -1.88   21.28
   2  44   1   14.69   22.26
   3  44   1    7.70   23.55
   4  44   1   17.17   24.23
  -3  45   1   -9.00   21.47
  -2  45   1   -4.16   21.64
  -1  45   1  -10.32   19.38
   0  45   1   16.01   21.40
   1  45   1   -6.32   20.10
   2  45   1   16.13   22.28
   3  45   1   21.23   24.03
   3  45  -2   46.98   28.99
   2  45  -2    1.68   22.41
   1  45  -2  115.34   29.51
   0  45  -2   12.29   23.09
  -1  45  -2   33.13   23.75
  -2  45  -2  -15.76   19.04
   5  44  -2   67.24   27.01
   4  44  -2  -10.78   21.00
   3  44  -2   -9.29   22.34
   2  44  -2    5.50   21.34
   1  44  -2   32.27   23.27
   0  44  -2   18.70   23.17
  -1  44  -2  -19.49   19.35
  -2  44  -2   -3.50   18.85
  -3  44  -2   16.84   22.39
  -4  44  -2  -32.75   20.34
   6  43  -2   -6.70   22.14
   5  43  -2    3.15   22.73
   4  43  -2   42.97   25.47
   3  43  -2   36.88   23.61
   2  43  -2   -5.00   18.69
   1  43  -2   65.47   25.91
   0  43  -2   12.62   20.79
  -1  43  -2  -10.74   19.62
  -2  43  -2  -15.03   18.12
  -3  43  -2   -1.26   20.19
  -4  43  -2   10.29   22.44
  -5  43  -2   21.47   23.74
   7  42  -2  -10.60   23.96
   6  42  -2    2.70   21.50
   5  42  -2   -0.22   23.17
   4  42  -2   88.91   27.83
   3  42  -2   -0.48   20.13
   2  42  -2   31.78   22.76
   1  42  -2   49.02   23.15
   0  42  -2  176.04   33.35
  -1  42  -2   -4.53   19.08
  -2  42  -2  -12.75   17.50
  -3  42  -2   -5.56   19.59
  -4  42  -2    2.04   20.03
  -5  42  -2    8.96   20.91
  -6  42  -2    5.02   22.71
   8  41  -2   57.18   29.03
   7  41  -2  -20.52   21.66
   6  41  -2   21.05   23.39
   5  41  -2   11.42   21.48
   4  41  -2   13.41   23.11
   3  41  -2   -3.85   20.51
   2  41  -2    8.57   18.69
   1  41  -2   12.65   21.18
   0  41  -2    4.31   18.25
  -1  41  -2   30.02   21.49
  -2  41  -2   24.93   18.80
  -3  41  -2    7.45   20.37
  -4  41  -2   41.24   21.71
  -5  41  -2  -13.29   18.90
  -6  41  -2   70.26   24.86
  -7  41  -2    3.56   23.46
  -7  41  -2   19.22   21.60
   9  40  -2   13.93   24.91
   8  40  -2   -9.14   20.79
   7  40  -2    4.65   22.57
   6  40  -2  -19.26   18.99
   5  40  -2   -2.86   20.69
   4  40  -2    0.91   20.04
   3  40  -2   -3.04   19.25
   2  40  -2    6.02   19.41
   1  40  -2  -10.11   17.27
   0  40  -2   69.27   24.43
  -1  40  -2  -22.27   17.72
  -2  40  -2  182.62   29.74
  -3  40  -2   21.85   18.88
  -4  40  -2   27.80   19.38
  -5  40  -2   21.82   19.40
  -6  40  -2  103.51   26.41
  -6  40  -2   81.58   23.86
  -7  40  -2   35.88   22.18
  -7  40  -2   20.94   21.15
  -8  40  -2    0.66   21.43
   9  39  -2    3.30   23.18
   8  39  -2  -31.06   22.91
   7  39  -2   19.03   25.04
   6  39  -2  -27.58   19.92
   5  39  -2   -9.53   17.54
   4  39  -2   -3.38   18.55
   3  39  -2   71.96   24.88
   2  39  -2   85.61   26.58
   1  39  -2   43.66   22.78
   0  39  -2   -6.17   18.99
  -1  39  -2   52.08   22.07
  -2  39  -2   -2.08   17.84
  -3  39  -2  147.49   27.74
  -4  39  -2    3.81   18.60
  -5  39  -2   12.99   17.60
  -5  39  -2   29.68   22.31
  -6  39  -2   31.90   21.09
  -6  39  -2   71.26   25.52
  -7  39  -2   52.46   22.86
  -8  39  -2  -11.80   21.52
  -9  39  -2   -3.93   20.86
  10  38  -2    0.52   24.92
   9  38  -2   32.25   25.20
   8  38  -2   -8.09   19.66
   7  38  -2   43.61   24.51
   6  38  -2  -16.58   18.66
   5  38  -2   57.35   24.66
   4  38  -2  -17.15   18.49
   3  38  -2   10.10   17.06
   2  38  -2   32.19   20.21
   1  38  -2  160.56   28.61
   0  38  -2  -20.35   16.36
  -1  38  -2    5.20   18.25
  -2  38  -2   -5.39   16.92
  -3  38  -2   34.15   20.64
  -4  38  -2    1.46   18.44
  -5  38  -2   43.67   20.04
  -5  38  -2   70.26   23.55
  -6  38  -2    3.87   17.56
  -7  38  -2  308.03   32.05
  -8  38  -2  -26.94   17.91
  -9  38  -2   26.47   25.45
  10  37  -2  -35.31   20.96
   9  37  -2   -7.69   20.31
   8  37  -2   14.48   21.93
   7  37  -2   21.52   22.32
   6  37  -2  -20.88   18.72
   5  37  -2    1.34   18.71
   4  37  -2   19.02   18.04
   3  37  -2   76.24   24.01
   2  37  -2   59.98   22.92
   1  37  -2   69.85   24.75
   0  37  -2  -30.91   14.89
  -1  37  -2   23.11   19.29
  -2  37  -2   27.28   18.68
  -3  37  -2  104.82   24.47
  -4  37  -2   35.95   20.59
  -4  37  -2   48.34   19.66
  -5  37  -2    3.25   17.63
  -6  37  -2  100.77   25.32
  -7  37  -2   32.65   21.46
  -8  37  -2   -0.83   20.45
  -9  37  -2  -20.97   18.89
 -10  37  -2   62.99   26.00
  11  36  -2   -1.54   24.41
  10  36  -2  -30.94   19.76
   9  36  -2   15.13   22.89
   8  36  -2   25.54   23.12
   7  36  -2   21.97   23.23
   6  36  -2  -18.53   17.19
   5  36  -2   26.55   23.19
   4  36  -2  184.18   31.05
   3  36  -2   30.21   18.74
   2  36  -2   40.84   20.32
   1  36  -2    1.27   17.49
   0  36  -2   76.78   21.23
  -1  36  -2  -36.70   13.69
  -2  36  -2  246.73   31.07
  -3  36  -2   15.59   17.05
  -3  36  -2   32.97   19.59
  -4  36  -2   34.06   21.24
  -4  36  -2   33.11   18.98
  -5  36  -2  -39.81   14.23
  -6  36  -2   70.96   24.41
  -7  36  -2   14.86   21.23
  -8  36  -2   -8.58   18.34
  -9  36  -2   -6.47   19.57
 -10  36  -2   -0.94   22.52
  11  35  -2  -16.93   21.56
  10  35  -2   -0.22   21.88
   9  35  -2   -4.66   19.99
   8  35  -2  205.08   35.31
   7  35  -2   39.92   23.01
   6  35  -2   97.59   26.34
   5  35  -2    4.36   18.06
   4  35  -2  158.00   28.56
   3  35  -2   28.45   19.01
   2  35  -2  112.75   24.59
   1  35  -2   36.52   18.75
   0  35  -2   24.28   16.51
  -1  35  -2   -1.63   16.41
  -2  35  -2   13.32   17.01
  -3  35  -2   94.05   23.25
  -3  35  -2   97.14   21.79
  -4  35  -2   70.70   22.63
  -5  35  -2  -23.78   15.27
  -6  35  -2  197.86   31.07
  -7  35  -2    3.12   18.90
  -8  35  -2   65.89   24.31
  -9  35  -2  -22.26   17.69
 -10  35  -2   53.21   24.54
 -11  35  -2   14.85   24.28
  12  34  -2   39.91   26.86
  11  34  -2   88.94   33.33
  10  34  -2   21.26   21.93
   9  34  -2   35.27   26.57
   8  34  -2   33.53   22.52
   7  34  -2   89.42   27.05
   6  34  -2   35.32   19.74
   5  34  -2   52.33   23.22
   4  34  -2  126.35   26.00
   3  34  -2  -14.40   14.30
   2  34  -2   55.79   20.75
   1  34  -2   87.58   21.56
   0  34  -2  303.04   27.17
  -1  34  -2   80.33   21.60
  -2  34  -2   29.87   16.55
  -2  34  -2   27.73   17.29
  -3  34  -2  -15.22   12.55
  -3  34  -2   -9.46   14.09
  -4  34  -2    7.52   17.40
  -5  34  -2  -23.58   15.24
  -6  34  -2    0.77   19.02
  -7  34  -2  221.82   32.59
  -8  34  -2   -1.98   17.66
  -9  34  -2  -29.42   18.54
 -10  34  -2  -26.41   18.41
 -11  34  -2   52.51   26.71
  12  33  -2   51.82   26.66
  11  33  -2    3.72   24.39
  10  33  -2   -0.42   21.88
   9  33  -2   37.29   23.66
   8  33  -2   10.63   19.47
   7  33  -2   86.32   25.79
   6  33  -2   68.31   21.75
   5  33  -2  169.43   29.47
   4  33  -2  131.48   26.11
   3  33  -2  108.36   24.41
   2  33  -2   -7.79   13.60
   1  33  -2  204.38   23.27
   0  33  -2  109.45   22.44
  -1  33  -2   66.31   19.95
  -2  33  -2    9.31   16.65
  -2  33  -2    9.27   13.66
  -3  33  -2   39.97   17.20
  -4  33  -2   22.13   16.56
  -5  33  -2  -13.93   16.28
  -6  33  -2  -17.63   16.30
  -7  33  -2   16.38   18.78
  -8  33  -2   15.04   20.47
  -9  33  -2   18.87   19.03
 -10  33  -2   16.20   19.42
 -11  33  -2   -7.24   18.62
 -12  33  -2  -49.25   20.36
  13  32  -2  -15.43   23.11
  12  32  -2   46.72   28.74
  11  32  -2   47.57   27.18
  10  32  -2    0.05   21.66
   9  32  -2  242.60   37.47
   8  32  -2   46.38   21.18
   7  32  -2  192.50   32.26
   6  32  -2   21.65   18.11
   5  32  -2  356.64   31.39
   4  32  -2  235.09   26.13
   3  32  -2   13.64   16.79
   2  32  -2  -14.09   15.10
   1  32  -2   27.71   17.45
   0  32  -2   30.16   16.59
  -1  32  -2   24.69   13.96
  -1  32  -2   25.94   15.75
  -2  32  -2   -7.15   14.15
  -2  32  -2  -14.03   11.51
  -3  32  -2  109.93   22.38
  -4  32  -2   51.77   19.23
  -5  32  -2  210.43   29.15
  -6  32  -2  -28.08   16.01
  -7  32  -2   94.50   24.93
  -8  32  -2  -15.15   17.59
  -9  32  -2   61.22   24.70
 -10  32  -2   -8.00   19.22
 -11  32  -2   65.01   26.41
 -12  32  -2  -13.60   18.07
  13  31  -2   32.75   26.95
  12  31  -2   -0.17   23.04
  11  31  -2   34.00   24.55
  10  31  -2   38.84   24.01
   9  31  -2   55.92   24.77
   8  31  -2  205.27   33.26
   7  31  -2    3.52   18.34
   6  31  -2  124.79   25.70
   5  31  -2   44.43   18.16
   4  31  -2  119.08   22.13
   3  31  -2   -0.58   13.09
   2  31  -2  -17.75   12.37
   1  31  -2  273.94   25.02
   0  31  -2  137.22   22.82
  -1  31  -2  358.06   27.01
  -1  31  -2  335.79   23.68
  -2  31  -2  -10.02   12.24
  -2  31  -2   -0.65   12.38
  -3  31  -2   48.87   18.42
  -4  31  -2  148.26   25.01
  -5  31  -2  307.71   27.44
  -6  31  -2   46.63   19.99
  -7  31  -2   -7.44   16.67
  -8  31  -2   -0.63   16.85
  -9  31  -2   -3.33   19.59
 -10  31  -2   49.96   23.86
 -11  31  -2   -9.54   18.08
 -12  31  -2  -24.54   21.38
  14  30  -2   57.72   30.03
  13  30  -2   -0.14   25.10
  12  30  -2   41.78   25.28
  11  30  -2  -17.91   19.77
  10  30  -2   12.61   19.85
   9  30  -2    6.40   18.73
   8  30  -2   42.82   22.48
   7  30  -2  -15.39   15.12
   6  30  -2   97.72   22.56
   5  30  -2   13.74   14.93
   4  30  -2  221.76   24.33
   3  30  -2   81.89   21.12
   2  30  -2   97.33   21.60
   1  30  -2   12.99   13.53
   0  30  -2  937.63   36.41
   0  30  -2  903.55   41.30
  -1  30  -2   19.32   14.69
  -1  30  -2   16.01   13.14
  -2  30  -2  205.46   25.77
  -3  30  -2   -6.69   13.06
  -4  30  -2   97.98   21.29
  -5  30  -2  190.54   25.55
  -6  30  -2   98.38   22.74
  -7  30  -2  -20.43   14.87
  -8  30  -2   63.07   23.43
  -9  30  -2  112.53   25.76
 -10  30  -2  -13.39   16.09
 -11  30  -2   14.14   20.25
 -12  30  -2   75.90   26.89
 -13  30  -2   13.57   25.31
  14  29  -2    5.19   23.86
  13  29  -2   23.02   25.11
  12  29  -2   41.37   25.09
  11  29  -2    4.95   22.08
  10  29  -2  141.83   30.53
   9  29  -2   38.42   21.43
   8  29  -2   81.63   24.76
   7  29  -2   98.88   24.30
   6  29  -2  209.27   23.16
   5  29  -2   76.74   20.70
   4  29  -2  249.45   25.31
   3  29  -2   32.21   17.19
   2  29  -2   16.32   13.90
   1  29  -2   72.60   18.61
   0  29  -2   15.28   11.26
   0  29  -2   45.47   14.88
  -1  29  -2    2.34   10.79
  -1  29  -2    7.13   13.66
  -2  29  -2   14.25   15.18
  -3  29  -2   -8.94   11.45
  -4  29  -2  402.91   28.84
  -5  29  -2   53.03   18.43
  -6  29  -2  247.28   24.82
  -7  29  -2   17.52   17.87
  -8  29  -2  412.29   32.15
  -9  29  -2   20.03   19.90
 -10  29  -2  174.07   30.13
 -11  29  -2  -19.78   18.49
 -12  29  -2  101.67   26.30
 -13  29  -2    0.72   19.35
  14  28  -2   26.89   27.97
  13  28  -2   -6.53   20.23
  12  28  -2    9.04   20.52
  11  28  -2   80.37   27.30
  10  28  -2   30.29   20.76
   9  28  -2  206.20   32.68
   8  28  -2   -4.59   14.22
   7  28  -2   28.45   18.17
   6  28  -2    1.38   13.72
   5  28  -2  201.77   27.51
   4  28  -2   26.50   16.24
   3  28  -2    8.55   13.09
   2  28  -2  196.65   21.23
   1  28  -2   -2.76   12.11
   1  28  -2    8.56    9.24
   0  28  -2  132.39   20.87
   0  28  -2  150.44   18.88
  -1  28  -2   28.03   14.45
  -1  28  -2   21.66   11.64
  -2  28  -2  290.02   23.75
  -3  28  -2   67.70   18.58
  -4  28  -2  324.29   25.68
  -5  28  -2  138.94   22.28
  -6  28  -2   81.41   20.04
  -7  28  -2  112.84   22.88
  -8  28  -2   35.75   19.21
  -9  28  -2   68.06   23.94
 -10  28  -2  121.30   28.13
 -11  28  -2   -6.47   19.63
 -12  28  -2  114.48   28.63
 -13  28  -2   80.52   26.60
 -14  28  -2   41.84   30.19
  15  27  -2   79.31   31.28
  14  27  -2    3.34   22.15
  13  27  -2   23.28   23.92
  12  27  -2  -19.79   19.15
  11  27  -2  -21.55   18.43
  10  27  -2   -2.94   19.03
   9  27  -2   16.95   17.60
   8  27  -2  -18.28   13.58
   7  27  -2  -11.73   14.36
   6  27  -2   15.00   15.81
   5  27  -2   64.55   17.78
   4  27  -2    6.33   13.55
   3  27  -2   93.41   19.33
   2  27  -2   21.60   13.45
   1  27  -2  171.06   22.18
   1  27  -2  140.21   13.96
   0  27  -2   47.12   15.60
   0  27  -2   40.37   11.54
  -1  27  -2  731.54   35.10
  -2  27  -2   -4.01   11.70
  -3  27  -2   65.12   17.90
  -4  27  -2   -2.42   13.33
  -5  27  -2  723.59   36.90
  -6  27  -2   73.82   20.38
  -7  27  -2   21.69   16.03
  -8  27  -2   90.90   22.49
  -9  27  -2   13.09   18.11
 -10  27  -2   21.10   20.53
 -11  27  -2   62.01   21.58
 -12  27  -2   75.88   25.56
 -13  27  -2  168.99   33.49
 -14  27  -2   19.21   26.22
  15  26  -2  -22.28   24.20
  14  26  -2   59.41   27.05
  13  26  -2   36.61   23.24
  12  26  -2  -15.39   18.62
  11  26  -2   66.06   23.85
  10  26  -2   -9.67   14.57
   9  26  -2   70.55   23.39
   8  26  -2   13.79   17.27
   7  26  -2  154.65   26.02
   6  26  -2   92.88   21.21
   5  26  -2  168.73   23.91
   4  26  -2    5.53   12.77
   3  26  -2  249.23   22.51
   2  26  -2   30.94   14.67
   1  26  -2  160.19   21.42
   1  26  -2  151.26   13.83
   0  26  -2  283.65   19.23
   0  26  -2  328.45   23.30
  -1  26  -2   52.31   15.05
  -2  26  -2    1.77   10.90
  -3  26  -2  207.80   24.49
  -4  26  -2   46.29   15.55
  -5  26  -2  190.17   24.61
  -6  26  -2   29.32   16.84
  -7  26  -2  315.17   27.10
  -8  26  -2  148.09   25.67
  -9  26  -2  378.74   30.61
 -10  26  -2   40.72   19.59
 -11  26  -2  229.00   32.94
 -12  26  -2    4.15   16.88
 -13  26  -2   23.39   20.69
 -14  26  -2   14.67   20.09
  15  25  -2   15.17   26.84
  14  25  -2    5.82   23.94
  13  25  -2  -12.58   18.71
  12  25  -2   77.76   26.69
  11  25  -2  129.74   28.31
  10  25  -2  133.72   27.90
   9  25  -2  -10.04   13.46
   8  25  -2  177.85   28.18
   7  25  -2    4.33   13.12
   6  25  -2  119.87   22.31
   5  25  -2   16.10   13.35
   4  25  -2   -8.31   10.63
   3  25  -2  430.72   27.49
   2  25  -2  163.01   20.70
   2  25  -2  172.96   13.29
   1  25  -2   22.99    9.68
   1  25  -2   27.74   13.39
   0  25  -2   42.24   11.84
   0  25  -2   62.23   15.25
  -1  25  -2  512.00   28.25
  -2  25  -2   46.16   14.92
  -3  25  -2  532.79   29.42
  -4  25  -2  215.62   21.07
  -5  25  -2   34.80   16.05
  -6  25  -2  157.95   22.68
  -7  25  -2   83.94   20.69
  -8  25  -2  439.73   31.58
  -9  25  -2  102.73   22.27
 -10  25  -2  273.03   27.57
 -11  25  -2  108.97   26.77
 -12  25  -2   56.49   21.55
 -13  25  -2   55.35   22.42
 -14  25  -2  -15.64   22.86
  15  24  -2   -8.97   22.03
  14  24  -2   48.77   25.76
  13  24  -2   -7.45   20.21
  12  24  -2   44.76   22.94
  11  24  -2   -3.22   17.29
  10  24  -2  137.78   27.44
   9  24  -2   -7.79   15.55
   8  24  -2   -1.93   14.70
   7  24  -2   50.02   18.19
   6  24  -2   11.91   12.78
   5  24  -2    0.67   11.27
   4  24  -2   76.45   17.65
   3  24  -2  114.22   18.71
   2  24  -2  405.36   18.64
   2  24  -2  379.65   24.99
   1  24  -2   76.90   16.31
   1  24  -2  108.40   11.89
   0  24  -2  681.27   28.00
   0  24  -2  711.97   32.18
  -1  24  -2   56.93   14.55
  -2  24  -2 1100.57   41.47
  -3  24  -2   96.22   18.00
  -4  24  -2  820.01   36.43
  -5  24  -2   65.72   17.10
  -6  24  -2  110.91   20.18
  -7  24  -2   -5.33   14.55
  -8  24  -2   36.48   17.38
  -9  24  -2   16.93   17.31
 -10  24  -2  110.65   24.14
 -11  24  -2   11.84   20.36
 -12  24  -2  109.32   27.64
 -13  24  -2    6.12   21.92
 -14  24  -2  133.95   34.04
 -15  24  -2   -7.02   26.98
  16  23  -2    2.33   23.92
  15  23  -2  -24.24   22.35
  14  23  -2  -32.88   17.85
  13  23  -2   -2.07   18.08
  12  23  -2   59.30   24.05
  11  23  -2    3.12   17.25
  10  23  -2  246.80   32.96
   9  23  -2   26.09   18.00
   8  23  -2   73.39   20.69
   7  23  -2   -2.02   12.15
   6  23  -2  694.23   36.93
   5  23  -2    9.62   11.25
   4  23  -2  102.89   18.52
   3  23  -2   40.11    9.03
   3  23  -2   38.48   11.57
   2  23  -2  382.16   24.36
   2  23  -2  378.15   17.73
   1  23  -2  103.12   16.82
   1  23  -2  113.37   13.61
   0  23  -2   18.94   12.15
  -1  23  -2  263.99   19.98
  -2  23  -2  675.18   31.27
  -3  23  -2  168.28   17.55
  -4  23  -2    7.98   11.00
  -5  23  -2  394.99   26.19
  -6  23  -2  721.82   35.90
  -7  23  -2   18.76   15.64
  -8  23  -2  208.39   22.88
  -9  23  -2   54.49   18.86
 -10  23  -2  214.75   29.15
 -11  23  -2   54.60   22.64
 -12  23  -2  241.01   34.98
 -13  23  -2    7.07   21.91
 -14  23  -2   -1.25   18.26
 -15  23  -2   41.15   30.36
  16  22  -2    1.83   25.66
  15  22  -2    9.14   24.31
  14  22  -2   -1.37   21.46
  13  22  -2   40.40   22.22
  12  22  -2    3.59   17.07
  11  22  -2    3.54   15.97
  10  22  -2  220.79   31.97
   9  22  -2  139.38   22.61
   8  22  -2   29.92   13.94
   7  22  -2  185.64   25.98
   6  22  -2   27.53   12.70
   5  22  -2  134.14   19.96
   4  22  -2  447.84   27.42
   3  22  -2  347.75   23.52
   3  22  -2  364.47   16.55
   2  22  -2 1285.01   34.74
   2  22  -2 1289.16   44.50
   1  22  -2  378.80   23.03
   1  22  -2  371.12   18.28
   0  22  -2   50.89   13.20
  -1  22  -2  241.13   18.54
  -2  22  -2  726.02   31.97
  -3  22  -2   51.19   13.73
  -4  22  -2  139.89   19.03
  -5  22  -2  521.00   29.07
  -6  22  -2  167.25   22.59
  -7  22  -2  524.84   31.52
  -8  22  -2  155.42   23.79
  -9  22  -2  378.44   29.16
 -10  22  -2   18.35   17.41
 -11  22  -2  197.04   30.04
 -12  22  -2   46.38   23.34
 -13  22  -2    6.28   20.38
 -14  22  -2  -21.64   21.15
 -15  22  -2    8.12   20.96
  16  21  -2   25.43   27.31
  15  21  -2   49.26   27.85
  14  21  -2  -31.73   18.31
  13  21  -2   94.95   26.38
  12  21  -2    0.99   17.12
  11  21  -2  362.26   32.64
  10  21  -2   86.38   23.91
   9  21  -2   44.60   19.25
  -9 -21   2   54.26   16.06
  -8 -21   2   -3.45   10.76
   8  21  -2   13.92   13.98
   7  21  -2   31.61   14.64
  -7 -21   2   18.05   10.76
   6  21  -2   27.51   13.56
   5  21  -2  253.80   21.91
   4  21  -2   61.15   14.68
   3  21  -2 1201.28   43.19
   3  21  -2 1211.95   31.55
   2  21  -2  186.49   17.46
   2  21  -2  172.06   12.29
   1  21  -2  398.57   18.38
   1  21  -2  436.43   23.78
   0  21  -2   23.48   11.24
  -1  21  -2 1105.44   38.51
  -2  21  -2   73.87   14.00
  -3  21  -2 1197.52   41.48
  -4  21  -2    2.02    9.89
  -5  21  -2  225.28   20.20
  -6  21  -2  114.32   19.32
  -7  21  -2   12.41   14.44
  -8  21  -2   94.77   20.39
  -9  21  -2  118.25   22.34
 -10  21  -2  -18.66   14.77
 -11  21  -2   41.13   19.03
 -12  21  -2   -4.34   17.72
 -13  21  -2   99.37   23.90
 -14  21  -2   27.69   25.38
 -15  21  -2  138.26   36.62
  16  20  -2   77.40   29.28
  15  20  -2   23.43   22.55
  14  20  -2  -19.11   19.10
  13  20  -2   17.48   21.00
  12  20  -2   -1.80   17.18
  11  20  -2   49.05   20.81
  10  20  -2  195.54   29.09
   9  20  -2  619.37   38.14
  -9 -20   2  655.51   30.56
  -8 -20   2    7.83   11.39
   8  20  -2   21.97   15.33
  -7 -20   2  723.82   31.30
   7  20  -2  667.02   36.03
  -6 -20   2   50.80   13.13
   6  20  -2   77.97   16.98
   5  20  -2  285.04   21.43
   4  20  -2    8.66   10.10
   4  20  -2   -9.15    5.44
   3  20  -2  972.49   26.89
   3  20  -2  961.67   36.85
   2  20  -2  135.30   17.54
   2  20  -2   88.64    9.71
   1  20  -2  329.39   20.62
   1  20  -2  300.41   15.52
   0  20  -2   83.26   14.51
  -1  20  -2  209.83   17.23
  -2  20  -2  858.67   33.35
  -3  20  -2  132.47   17.16
  -4  20  -2  198.22   18.10
  -5  20  -2  407.26   24.88
  -6  20  -2   14.17   11.13
  -7  20  -2   -3.29   12.85
  -8  20  -2  -18.39   12.47
  -9  20  -2  366.34   28.21
 -10  20  -2  123.44   24.31
 -11  20  -2  146.62   24.98
 -12  20  -2    1.39   17.29
 -13  20  -2   79.53   26.38
 -14  20  -2   -5.10   21.65
 -15  20  -2   73.46   32.03
 -16  20  -2  119.88   39.29
  16  19  -2   15.16   22.72
  15  19  -2    0.53   20.84
  14  19  -2   -7.99   18.33
  13  19  -2   53.09   22.85
  12  19  -2  -11.84   15.94
  11  19  -2   24.98   17.95
  10  19  -2  638.20   39.89
  -9 -19   2   -1.45   10.97
   9  19  -2   19.11   15.73
   8  19  -2  190.62   25.66
  -8 -19   2  152.24   15.44
   7  19  -2    5.33   10.49
  -7 -19   2   10.54    9.27
   6  19  -2  942.01   40.36
  -6 -19   2  874.72   33.78
   5  19  -2  377.98   24.78
  -5 -19   2  403.98   22.31
   4  19  -2  197.47   11.60
   4  19  -2  236.97   19.63
   3  19  -2  431.40   16.34
   3  19  -2  440.09   24.59
   1  19  -2  358.72   16.23
   1  19  -2  320.31   19.61
  -1  19  -2  790.98   30.80
  -2  19  -2 1009.61   35.68
  -3  19  -2   95.39   15.15
  -4  19  -2   22.89   11.01
  -5  19  -2   16.35   10.72
  -6  19  -2  441.44   26.23
  -7  19  -2  -11.01   10.83
  -8  19  -2  143.55   23.05
  -9  19  -2   12.06   14.13
 -10  19  -2   99.92   22.14
 -11  19  -2    8.02   15.01
 -12  19  -2  354.11   32.08
 -13  19  -2  201.57   34.52
 -14  19  -2   -0.23   17.94
 -15  19  -2   48.46   27.36
 -16  19  -2   35.84   25.87
  17  18  -2   38.89   27.73
  16  18  -2    3.29   23.87
  15  18  -2   42.94   25.24
  14  18  -2  200.49   34.77
  13  18  -2  -20.01   16.13
  12  18  -2   25.13   19.70
  11  18  -2   21.58   16.72
  10  18  -2  311.20   28.84
   9  18  -2    0.82   13.64
  -9 -18   2   -2.01    9.92
  -8 -18   2    6.43   10.58
   8  18  -2   14.10   13.26
  -7 -18   2  135.57   14.14
   7  18  -2  151.80   21.57
   6  18  -2  202.00   18.54
  -6 -18   2  213.72   16.60
  -5 -18   2   35.48   11.17
   5  18  -2   28.59   12.22
   5  18  -2   29.97    6.19
   4  18  -2  737.56   20.92
   4  18  -2  740.73   32.29
   3  18  -2   21.57    6.50
   3  18  -2   52.22   12.58
   2  18  -2 2048.61   54.66
   2  18  -2 2055.82   43.93
   1  18  -2  355.08   16.12
   1  18  -2  375.54   20.55
   0  18  -2  980.85   33.62
  -2  18  -2 1497.87   44.05
  -3  18  -2   93.33   14.71
  -4  18  -2 1023.60   36.73
  -5  18  -2   31.11   11.76
  -6  18  -2   -2.49   10.34
  -7  18  -2  -12.63    9.94
  -8  18  -2   60.97   17.39
  -9  18  -2  144.21   21.24
 -10  18  -2   35.07   17.61
 -11  18  -2   72.87   19.75
 -12  18  -2   51.95   21.27
 -13  18  -2   48.11   24.56
 -14  18  -2   83.77   27.87
 -15  18  -2   19.22   22.99
 -16  18  -2  400.16   56.08
  17  17  -2  -10.97   22.23
  16  17  -2  -15.54   20.43
  15  17  -2    9.13   20.20
  14  17  -2   29.07   22.06
  13  17  -2   10.84   19.00
  12  17  -2  -14.51   13.57
  11  17  -2  191.05   29.31
  10  17  -2  844.52   44.25
  -9 -17   2    3.13   10.45
   9  17  -2    4.49   12.12
   8  17  -2   35.07   15.17
  -8 -17   2   24.79   12.01
   7  17  -2  124.51   19.66
  -7 -17   2  108.47   15.16
  -6 -17   2  230.36   17.30
   6  17  -2  261.08   20.18
   5  17  -2  138.11   15.75
  -5 -17   2  125.82   13.14
   5  17  -2  131.69    8.23
   4  17  -2  181.71   16.70
   4  17  -2  150.85    9.07
  -4 -17   2  158.28   14.07
   3  17  -2  560.14   17.52
   3  17  -2  586.63   27.00
   2  17  -2  104.73   14.02
   2  17  -2   70.33    7.74
   1  17  -2  105.62   13.93
   0  17  -2   77.66   12.28
  -1  17  -2  813.20   29.92
  -4  17  -2  394.91   22.60
  -5  17  -2  155.70   15.93
  -6  17  -2  329.49   22.47
  -7  17  -2   19.75   13.80
  -8  17  -2  658.31   33.32
  -9  17  -2    5.37   13.78
 -10  17  -2  145.38   23.75
 -11  17  -2   -8.64   13.31
 -12  17  -2   98.26   24.43
 -13  17  -2   52.51   24.65
 -14  17  -2   51.46   26.73
 -15  17  -2   65.73   31.35
 -16  17  -2  -19.68   31.61
  17  16  -2    4.68   22.90
  16  16  -2   17.73   23.41
  15  16  -2   -3.01   17.48
  14  16  -2  197.85   33.18
  13  16  -2   14.80   17.41
  12  16  -2  -22.51   13.43
  11  16  -2    5.20   15.51
  10  16  -2   30.44   16.05
 -10 -16   2   17.83   11.49
  -9 -16   2  518.65   25.12
   9  16  -2  459.22   30.80
   8  16  -2   -4.33    8.17
  -8 -16   2  -10.27    7.41
   7  16  -2  722.40   35.09
  -7 -16   2  705.72   28.47
   6  16  -2  139.26    8.53
   6  16  -2  185.85   18.26
  -6 -16   2  200.86   15.35
  -5 -16   2  475.74   22.62
   5  16  -2  485.22   25.95
   5  16  -2  442.63   14.08
   4  16  -2   -8.36    3.52
   4  16  -2   -1.69    8.13
  -4 -16   2   -1.34    6.45
   3  16  -2 1922.62   52.66
  -3 -16   2 1977.26   51.23
   3  16  -2 1961.40   39.71
   2  16  -2   13.74    8.42
   2  16  -2   -1.64    4.81
   1  16  -2   68.39   11.73
   0  16  -2  594.22   24.27
  -1  16  -2  141.49   13.46
  -2  16  -2   12.93    8.70
  -4  16  -2  355.38   21.02
  -5  16  -2  666.52   29.22
  -6  16  -2  192.40   17.87
  -7  16  -2    8.79   12.05
  -8  16  -2   37.73   15.19
  -9  16  -2  414.33   28.82
 -10  16  -2   32.00   15.03
 -11  16  -2  112.22   22.81
 -12  16  -2  142.48   27.27
 -13  16  -2  174.32   31.87
 -14  16  -2   91.55   30.90
 -15  16  -2   43.47   30.21
 -16  16  -2    7.38   25.30
  17  15  -2  115.05   31.41
  16  15  -2   42.01   22.65
  15  15  -2   94.77   26.78
  14  15  -2   85.83   25.87
  13  15  -2  189.27   30.79
  12  15  -2  -19.75   14.61
  11  15  -2   87.53   22.41
  10  15  -2   15.06   13.29
 -10 -15   2   29.81   11.41
   9  15  -2   26.54   14.08
  -9 -15   2   25.30   11.34
   8  15  -2   65.15   16.98
  -8 -15   2  103.18   14.60
  -7 -15   2   68.83   12.38
   7  15  -2   67.75   15.50
   6  15  -2  349.77   23.33
   6  15  -2  392.12   13.15
  -6 -15   2  410.92   20.72
   5  15  -2  534.52   26.79
  -5 -15   2  547.38   23.46
   5  15  -2  511.81   14.64
  -4 -15   2  185.59   13.97
   4  15  -2  198.02   16.48
   4  15  -2  191.21    8.81
   3  15  -2   67.78    6.54
  -3 -15   2   36.32    9.41
   2  15  -2    9.65    7.21
   1  15  -2 1133.73   34.55
  -1  15  -2 4782.84   96.04
  -2  15  -2    2.20    7.21
  -3  15  -2  136.58   13.65
  -5  15  -2 1494.75   45.88
  -6  15  -2    9.21   10.19
  -7  15  -2   30.14   12.69
  -8  15  -2   55.75   15.74
  -9  15  -2   67.64   17.98
 -10  15  -2   53.48   17.96
 -11  15  -2   55.60   19.63
 -12  15  -2  169.85   28.72
 -13  15  -2  425.59   37.23
 -14  15  -2  -13.27   21.71
 -15  15  -2   77.54   28.12
 -16  15  -2   -0.70   36.11
  17  14  -2    3.78   20.63
  16  14  -2    3.81   19.33
  15  14  -2  165.45   30.05
  14  14  -2  146.34   29.45
  13  14  -2  108.31   24.99
  12  14  -2  -23.64   13.20
  11  14  -2  239.76   25.90
 -10 -14   2  120.96   16.39
  10  14  -2  120.73   22.15
   9  14  -2  323.68   25.44
  -9 -14   2  317.81   19.44
   8  14  -2  197.82   19.93
  -8 -14   2  210.33   15.57
   7  14  -2   42.04   13.33
  -7 -14   2   54.69   10.54
   7  14  -2   57.79    8.01
  -6 -14   2  108.70   11.40
   6  14  -2  100.08    7.10
   6  14  -2   81.89   14.95
  -5 -14   2  511.15   22.22
   5  14  -2  460.95   24.41
   5  14  -2  437.70   13.15
   4  14  -2   29.19    5.11
   4  14  -2   34.52   10.71
  -4 -14   2   23.23    8.41
   3  14  -2 1044.85   34.48
  -3 -14   2 1026.46   32.37
   3  14  -2 1048.70   23.57
   2  14  -2 1032.70   23.84
  -2 -14   2 1000.15   31.75
   2  14  -2  966.60   31.67
   1  14  -2   59.32    9.96
   0  14  -2 1562.27   41.24
  -1  14  -2  555.06   22.41
  -2  14  -2  781.88   27.59
  -3  14  -2   59.57   11.44
  -4  14  -2 1793.70   48.80
  -5  14  -2 1312.54   41.72
  -6  14  -2   -1.85    9.08
  -7  14  -2  487.24   26.84
  -8  14  -2   92.89   17.29
  -9  14  -2 1241.14   47.58
 -10  14  -2   91.23   21.48
 -11  14  -2   76.25   22.00
 -12  14  -2  189.43   30.22
 -13  14  -2   -1.64   18.10
 -14  14  -2   13.56   20.34
 -15  14  -2   37.79   30.46
 -16  14  -2   89.44   43.33
  17  13  -2   86.52   28.76
  16  13  -2   23.61   22.66
  15  13  -2  133.89   29.37
  14  13  -2   65.37   21.45
  13  13  -2   35.02   19.57
  12  13  -2    4.38   15.07
  11  13  -2    7.99   15.34
  10  13  -2  312.61   25.15
 -10 -13   2  333.99   20.17
   9  13  -2   15.04   12.98
  -9 -13   2   -2.56    7.96
   8  13  -2   94.00   17.62
  -8 -13   2  103.54   11.90
   7  13  -2  239.07   19.90
   7  13  -2  219.82   11.00
  -7 -13   2  243.02   15.44
  -6 -13   2   90.65   10.28
   6  13  -2   76.75    6.32
   6  13  -2   64.62   13.76
   5  13  -2  583.32   26.43
  -5 -13   2  604.72   23.73
   5  13  -2  573.26   15.06
  -4 -13   2 2278.37   54.31
   4  13  -2 2219.09   41.54
   4  13  -2 2311.77   58.14
  -3 -13   2   63.39   10.08
   3  13  -2   55.19    5.09
   3  13  -2   58.13    9.44
   2  13  -2  520.23   14.62
   2  13  -2  520.49   21.38
  -2 -13   2  457.25   20.15
   1  13  -2  319.28   16.06
   0  13  -2 1978.76   47.68
  -1  13  -2  287.61   15.60
  -2  13  -2   28.92    8.21
  -3  13  -2  494.09   21.68
  -4  13  -2 1159.56   36.83
  -6  13  -2  532.05   26.24
  -7  13  -2   84.48   15.76
  -8  13  -2 1412.54   48.77
  -9  13  -2   37.01   15.44
 -10  13  -2  333.44   27.52
 -11  13  -2  -18.43   14.42
 -12  13  -2  164.64   29.16
 -13  13  -2   13.68   20.16
 -14  13  -2    2.34   23.49
 -15  13  -2  143.77   41.83
 -16  13  -2    3.00   28.15
 -17  13  -2   12.48   47.93
  18  12  -2   48.87   27.26
  17  12  -2   21.00   23.61
  16  12  -2   99.37   28.27
  15  12  -2   -2.18   19.23
  14  12  -2  207.03   32.24
  13  12  -2   28.98   17.45
  12  12  -2  -13.53   15.13
  11  12  -2  424.61   31.75
  10  12  -2   28.27   14.56
 -10 -12   2    7.65   10.84
   9  12  -2    4.29   10.34
  -9 -12   2   24.42    9.52
  -8 -12   2    9.39    7.64
   8  12  -2   -2.77    9.15
   7  12  -2   80.52   15.31
  -7 -12   2  106.25   12.92
   7  12  -2   78.53    7.47
   6  12  -2  210.60    9.67
  -6 -12   2  205.75   14.20
   6  12  -2  203.47   16.39
   5  12  -2   -1.41    3.15
   5  12  -2    4.96    7.51
  -5 -12   2    5.76    6.74
   4  12  -2  504.87   22.65
  -4 -12   2  498.31   20.63
  -3 -12   2   76.71   10.23
   3  12  -2   46.47    4.42
   3  12  -2   56.68    8.85
   2  12  -2 1401.30   28.97
   2  12  -2 1457.11   38.61
  -2 -12   2 1454.87   38.22
   1  12  -2  184.17   11.96
   0  12  -2  262.85   13.75
  -1  12  -2 1616.57   40.70
  -2  12  -2  549.51   21.53
  -3  12  -2   43.33    9.10
  -4  12  -2 1238.69   37.50
  -6  12  -2  296.95   19.73
  -7  12  -2    3.61    9.14
  -8  12  -2   12.38   11.96
  -9  12  -2  117.55   20.15
 -10  12  -2   96.62   20.37
 -11  12  -2  -10.80   15.30
 -12  12  -2  272.27   29.16
 -13  12  -2    6.12   20.38
 -14  12  -2  375.34   48.27
 -15  12  -2  -25.49   26.11
 -16  12  -2  445.14   67.49
 -17  12  -2  139.67   55.14
  18  11  -2   -7.16   22.16
  17  11  -2  -24.70   19.03
  16  11  -2   27.24   20.89
  15  11  -2  -17.23   16.80
  14  11  -2   67.62   22.51
  13  11  -2  134.24   25.65
  12  11  -2  351.15   28.74
  11  11  -2   12.00   15.05
  10  11  -2  158.52   23.33
 -10 -11   2  121.91   13.98
  -9 -11   2   -4.43    6.83
   9  11  -2   -0.56    9.84
   8  11  -2  342.28   23.54
  -8 -11   2  311.48   17.31
   7  11  -2   37.57   12.39
  -7 -11   2   32.56    9.40
   6  11  -2  429.53   13.85
   6  11  -2  428.30   23.38
  -6 -11   2  432.82   19.51
  -5 -11   2   35.54    8.16
   5  11  -2   10.88    7.90
   5  11  -2   37.65    5.04
  -4 -11   2  716.61   24.53
   4  11  -2  737.79   27.51
  -3 -11   2   73.85    8.39
   3  11  -2   69.18   10.37
   2  11  -2   28.83    4.10
  -2 -11   2   13.55    5.98
  -1 -11   2   24.76    6.65
   1  11  -2   47.47    7.72
   0  11  -2  149.31   10.62
  -1  11  -2  823.90   25.51
  -2  11  -2   72.73    7.92
  -3  11  -2   71.21   10.17
  -4  11  -2  415.46   20.06
  -5  11  -2 1507.02   43.59
  -6  11  -2  596.32   26.56
  -7  11  -2   37.28   12.07
  -8  11  -2  468.63   27.24
  -9  11  -2   33.81   15.56
 -10  11  -2  457.68   31.21
 -11  11  -2   20.88   17.97
 -12  11  -2  199.33   30.10
 -13  11  -2  504.82   40.95
 -14  11  -2   61.32   31.36
 -15  11  -2   47.85   30.00
 -16  11  -2   76.81   46.20
 -17  11  -2  103.59   65.47
  18  10  -2    0.32   22.65
  17  10  -2    9.04   20.11
  16  10  -2  150.64   31.49
  15  10  -2   -3.67   17.10
  14  10  -2  -12.31   13.16
  13  10  -2  184.56   27.61
  12  10  -2  208.58   29.11
  11  10  -2    8.96   13.30
  10  10  -2   26.81   13.72
 -10 -10   2    9.59   10.95
   9  10  -2  183.25   19.20
  -9 -10   2  245.72   15.97
  -8 -10   2  377.37   19.21
   8  10  -2  408.01   25.25
  -7 -10   2  383.50   18.95
   7  10  -2  380.43   23.28
   6  10  -2   14.38    8.41
   6  10  -2   14.33    4.98
  -6 -10   2   17.19    7.40
   5  10  -2  758.14   28.96
   5  10  -2  699.15   17.31
  -5 -10   2  758.25   25.28
   4  10  -2  709.37   26.31
  -4 -10   2  696.71   23.58
  -3 -10   2  400.45   16.70
   3  10  -2  358.20   17.13
  -2 -10   2   70.86    8.99
   2  10  -2   64.83    7.00
   2  10  -2   66.79    4.20
   1  10  -2  441.02   16.98
  -1 -10   2  412.83   16.94
   0  10  -2 1151.37   30.57
  -1  10  -2  720.87   22.98
  -2  10  -2    0.83    4.54
  -3  10  -2  134.26   10.97
  -4  10  -2    0.02    5.97
  -5  10  -2 1475.99   42.64
  -7  10  -2  681.68   30.64
  -8  10  -2    9.77   11.25
  -9  10  -2  781.58   37.06
 -10  10  -2  -19.47   13.73
 -11  10  -2  373.95   30.86
 -12  10  -2   21.70   17.76
 -13  10  -2   25.65   23.28
 -14  10  -2  -20.15   25.76
 -15  10  -2   -1.01   33.52
 -16  10  -2   57.01   41.58
 -17  10  -2  101.88   61.04
  18   9  -2   -4.77   21.75
  17   9  -2  167.29   31.45
  16   9  -2   37.17   22.05
  15   9  -2  100.72   26.43
  14   9  -2  -10.14   15.91
  13   9  -2  201.61   28.86
  12   9  -2  173.36   26.47
  11   9  -2  466.24   31.94
 -10  -9   2  -11.83    7.47
  10   9  -2   -2.10    9.80
   9   9  -2   20.26   11.92
  -9  -9   2   22.65    8.86
  -8  -9   2  295.26   16.92
   8   9  -2  299.14   21.61
   7   9  -2  130.19   14.68
  -7  -9   2  142.62   12.40
   6   9  -2   86.01    6.93
   6   9  -2   65.03   12.37
  -6  -9   2   96.23   11.59
   5   9  -2  357.80   19.21
   5   9  -2  325.99   10.71
  -5  -9   2  340.67   15.93
  -4  -9   2   22.54    6.27
   4   9  -2   27.27    7.46
   3   9  -2 1365.20   36.24
  -3  -9   2 1354.42   34.68
   2   9  -2   26.79    6.23
  -2  -9   2   22.88    5.86
   1   9  -2 1530.44   35.36
  -1  -9   2 1359.37   34.92
   0   9  -2 2867.61   58.36
  -1   9  -2 1005.86   27.57
  -2   9  -2    5.04    4.94
  -3   9  -2 1600.40   40.07
  -4   9  -2  285.64   15.94
  -5   9  -2    8.84    8.00
  -6   9  -2   84.90   14.29
  -7   9  -2   18.03   11.23
  -8   9  -2  281.61   21.99
  -9   9  -2   49.49   16.51
 -10   9  -2   -5.09   10.98
 -11   9  -2   28.94   18.54
 -12   9  -2   10.31   17.50
 -13   9  -2  138.08   34.41
 -14   9  -2   85.47   34.22
 -15   9  -2  291.24   56.39
 -16   9  -2  114.12   58.55
 -17   9  -2  403.52  100.48
  18   8  -2  -14.36   18.99
  17   8  -2   16.37   21.78
  16   8  -2   22.19   21.68
  15   8  -2  -10.06   15.23
  14   8  -2    3.70   16.08
  13   8  -2  114.82   23.00
  12   8  -2  139.65   23.03
  11   8  -2 1149.72   49.32
 -10  -8   2   84.46   13.48
  10   8  -2  103.63   19.27
   9   8  -2  397.95   25.59
  -9  -8   2  398.22   19.61
  -8  -8   2   33.00    9.03
   8   8  -2   18.52   10.85
   7   8  -2 1637.07   49.46
  -7  -8   2 1613.18   42.16
   6   8  -2    4.20    5.96
  -6  -8   2    0.81    5.20
  -5  -8   2  661.82   22.63
   5   8  -2  668.19   16.62
   5   8  -2  660.94   25.97
  -4  -8   2    7.94    5.23
   4   8  -2    3.41    5.33
   3   8  -2  704.75   23.24
  -3  -8   2  673.37   21.57
   2   8  -2  583.53   19.55
  -2  -8   2  587.63   19.26
   1   8  -2 1341.89   31.47
  -1  -8   2 1218.58   31.31
   0   8  -2  204.74   10.77
   0  -8   2  218.76   11.19
  -1   8  -2  138.15    9.28
  -2   8  -2  539.01   19.07
  -3   8  -2  374.19   16.51
  -4   8  -2  385.96   18.10
  -5   8  -2   25.44    9.11
  -6   8  -2  372.95   21.55
  -7   8  -2  490.47   26.00
  -8   8  -2   45.76   14.67
  -9   8  -2  -16.99    8.30
 -10   8  -2  -22.02   13.03
 -11   8  -2  451.13   34.85
 -12   8  -2  165.48   30.65
 -13   8  -2  148.63   36.58
 -14   8  -2   90.71   30.78
 -15   8  -2   34.03   38.91
 -16   8  -2  283.07   69.94
 -17   8  -2  222.93   84.16
  18   7  -2  -27.47   17.67
  17   7  -2   57.02   24.39
  16   7  -2    0.02   16.52
  15   7  -2   15.90   19.34
  14   7  -2   -2.60   15.11
  13   7  -2    4.35   14.74
  12   7  -2  196.63   27.03
  11   7  -2  100.81   20.80
  10   7  -2  222.18   20.26
 -10  -7   2  242.01   16.90
  -9  -7   2  124.78   14.38
   9   7  -2  109.48   17.87
   8   7  -2  347.83   22.73
  -8  -7   2  382.77   18.92
   7   7  -2  407.96   22.70
  -7  -7   2  379.52   18.28
   6   7  -2  703.04   28.05
  -6  -7   2  673.53   23.37
   5   7  -2  663.88   25.49
  -5  -7   2  670.41   22.29
   4   7  -2   21.68    6.65
  -4  -7   2   26.78    6.32
  -3  -7   2  974.50   26.78
   3   7  -2 1016.15   28.37
   2   7  -2  146.07    9.25
  -2  -7   2  142.96    9.01
   1   7  -2 1981.98   41.08
  -1  -7   2 1852.63   41.41
   0   7  -2   65.55    6.73
   0  -7   2   67.61    6.72
  -1   7  -2    2.41    4.00
  -2   7  -2   25.69    6.13
  -3   7  -2  649.15   21.94
  -4   7  -2  220.01   13.75
  -5   7  -2  785.32   28.02
  -6   7  -2 1451.63   43.09
  -7   7  -2   -2.51    9.16
  -8   7  -2  186.11   17.56
 -13   7  -2   19.36   27.90
 -14   7  -2    0.91   29.89
 -15   7  -2    5.49   39.82
 -16   7  -2   96.15   58.86
 -17   7  -2  275.21  111.58
  18   6  -2   55.88   25.75
  17   6  -2   15.30   18.95
  16   6  -2  162.34   30.91
  15   6  -2   22.06   18.17
  14   6  -2   83.81   22.54
  13   6  -2   33.21   17.42
  12   6  -2  396.89   30.36
  11   6  -2  481.16   31.61
 -10  -6   2   28.54   10.59
  10   6  -2   48.64   14.88
  -9  -6   2  292.42   17.10
   9   6  -2  266.56   21.41
  -8  -6   2  167.95   13.82
   8   6  -2  189.09   17.49
   7   6  -2    5.42    8.20
  -7  -6   2    2.87    6.41
  -6  -6   2  170.48   11.25
   6   6  -2  183.21   14.53
   5   6  -2    7.43    5.73
  -5  -6   2    8.43    5.18
  -4  -6   2  758.08   22.62
   4   6  -2  744.36   24.67
  -3  -6   2  203.57   10.61
   3   6  -2  204.67   11.32
   2   6  -2  737.70   21.03
  -2  -6   2  715.59   20.73
  -1  -6   2   35.56    5.55
   1   6  -2   66.55    6.05
   0  -6   2 1569.45   34.25
   0   6  -2 1508.58   33.26
  -1   6  -2 1204.77   28.49
  -2   6  -2   14.45    5.04
  -3   6  -2   41.91    7.60
  -4   6  -2   75.77    9.32
  -5   6  -2  582.84   23.46
   7  -6   2   37.95   11.75
   8  -6   2   27.44   11.72
   9  -6   2   49.82   14.05
  10  -6   2   15.11   10.89
  11  -6   2    1.65   14.38
  12  -6   2  -12.08   13.28
  13  -6   2   30.60   18.13
 -15   6  -2  -32.28   44.40
 -16   6  -2  160.82   79.36
 -17   6  -2   95.46  106.00
  18   5  -2  -13.72   17.67
  17   5  -2   46.97   22.80
  16   5  -2   13.84   18.36
  15   5  -2   80.76   24.50
  14   5  -2  112.60   23.51
  13   5  -2   28.37   17.33
  12   5  -2  355.35   29.08
  11   5  -2  717.56   37.66
  10   5  -2  225.80   21.03
 -10  -5   2  182.16   15.56
   9   5  -2    9.72    9.42
  -9  -5   2    6.50    7.43
   8   5  -2 2746.28   70.41
  -8  -5   2 2679.03   62.34
   7   5  -2  111.17   15.04
  -7  -5   2  124.93   11.41
   6   5  -2   82.70   12.14
   5   5  -2  229.46   14.18
  -5  -5   2  229.73   12.38
   4   5  -2  538.96   19.77
  -4  -5   2  475.73   17.35
  -3  -5   2 1059.12   27.13
   3   5  -2 1073.26   28.09
  -2  -5   2 1392.21   32.12
   2   5  -2 1438.45   32.02
   1   5  -2  216.91    8.99
  -1  -5   2  214.51    9.49
   0  -5   2  974.67   23.54
   0   5  -2  958.92   23.01
   0  -5   2 1006.10   21.51
  -1   5  -2 2963.31   56.55
   1  -5   2 2961.02   55.39
   2  -5   2  125.22    8.98
  -2   5  -2  147.01    8.67
  -3   5  -2 1996.64   45.47
   3  -5   2 2087.34   46.46
  -4   5  -2  729.87   24.62
   4  -5   2  681.48   24.70
   5  -5   2   99.04   12.40
   6  -5   2  126.55   13.21
   7  -5   2  587.51   27.85
   8  -5   2    0.26    9.84
   9  -5   2   -2.33   10.05
  10  -5   2  261.32   23.53
  11  -5   2    7.18   14.39
  12  -5   2   20.46   16.24
  13  -5   2    7.80   15.55
  14  -5   2  175.11   29.65
  15  -5   2   31.35   19.12
 -17   5  -2  395.97  177.91
  18   4  -2   18.64   22.19
  17   4  -2   15.77   18.04
  16   4  -2   41.61   21.84
  15   4  -2   18.61   18.31
  14   4  -2   98.35   22.99
  13   4  -2   55.85   18.89
  12   4  -2   24.77   16.24
  11   4  -2  874.09   41.15
  10   4  -2  578.96   31.43
 -10  -4   2  558.82   25.25
   9   4  -2  353.24   23.50
  -9  -4   2  345.40   18.93
   8   4  -2   27.19    9.87
  -8  -4   2    5.12    8.95
  -7  -4   2 1782.88   44.93
   7   4  -2 1752.86   49.82
   6   4  -2   81.21   11.80
   5   4  -2  787.64   26.49
  -5  -4   2  756.93   23.64
   4   4  -2  469.25   18.20
  -4  -4   2  481.44   17.09
  -3  -4   2   59.01    6.25
   3   4  -2   64.57    6.86
  -2  -4   2   83.67    6.34
   2   4  -2   92.21    6.34
  -1  -4   2  307.33   10.92
   1   4  -2  331.68   10.50
   0  -4   2  760.66   17.12
   0   4  -2  748.97   18.33
   0  -4   2  740.80   18.55
  -1   4  -2   83.28    5.97
   1  -4   2   81.79    6.04
  -2   4  -2   44.31    6.56
   2  -4   2   40.40    6.78
   3  -4   2 2551.34   53.87
  -3   4  -2 2531.78   53.67
   4  -4   2  173.49   11.91
   4  -4   2  172.46   12.34
   5  -4   2   16.88    6.57
   5  -4   2   -0.09    6.42
   6  -4   2  577.46   25.71
   7  -4   2 1054.38   38.05
   8  -4   2  461.88   26.32
   9  -4   2   16.06   11.40
  10  -4   2   12.39   12.30
  11  -4   2  222.15   27.65
  12  -4   2   -3.47   14.73
  13  -4   2  156.19   26.58
  14  -4   2   49.55   19.94
  15  -4   2    1.79   18.17
  16  -4   2    6.16   19.98
  18   3  -2  -18.86   19.66
  17   3  -2  111.24   27.70
  16   3  -2   47.98   20.40
  15   3  -2  192.42   29.62
  14   3  -2   85.49   22.50
  13   3  -2  160.63   25.00
  12   3  -2  -19.19   11.91
  11   3  -2   49.79   14.69
 -10  -3   2    0.52   10.13
  10   3  -2   20.03   12.19
  -9  -3   2   38.24   10.72
   9   3  -2   27.03   11.41
   8   3  -2  148.84   15.63
  -8  -3   2  123.88   12.87
   7   3  -2  247.37   17.31
  -7  -3   2  216.43   14.36
   6   3  -2  102.61   10.92
   5   3  -2  114.76   10.31
  -5  -3   2  123.52    9.21
   4   3  -2  232.76   12.43
  -4  -3   2  246.51   11.73
   3   3  -2  174.06    9.63
  -3  -3   2  180.83    9.50
   2   3  -2    2.62    2.76
  -2  -3   2   -0.60    2.56
   1   3  -2 2171.53   41.17
  -1  -3   2 2236.07   43.40
   0   3  -2  899.73   20.02
   0  -3   2  890.73   20.41
   1  -3   2   39.55    4.37
  -1   3  -2   42.52    4.29
   1  -3   2   38.93    3.66
   2  -3   2 5530.71   96.55
  -2   3  -2 5479.60   98.18
   3  -3   2 1069.40   28.76
   3  -3   2 1043.02   28.42
   4  -3   2  123.06   10.49
   4  -3   2  101.67    9.68
   5  -3   2    9.12    6.66
   5  -3   2    4.08    6.25
   6  -3   2   78.32   12.95
   6  -3   2   50.62   12.25
   7  -3   2   50.58   12.58
   8  -3   2  184.44   18.09
   9  -3   2   70.07   15.31
  10  -3   2   -0.50   11.36
  11  -3   2  184.61   25.83
  12  -3   2   57.57   19.33
  13  -3   2   18.04   15.80
  14  -3   2   -4.62   15.16
  15  -3   2   52.84   23.71
  16  -3   2   35.22   21.92
  17  -3   2   84.69   28.49
  18   2  -2   25.26   22.22
  17   2  -2   11.95   18.38
  16   2  -2   12.57   18.20
  15   2  -2  237.80   32.08
  14   2  -2   28.35   17.22
  13   2  -2  142.46   24.84
  12   2  -2   59.28   18.88
  11   2  -2  812.50   39.16
  10   2  -2   46.68   14.05
 -10  -2   2   28.86   11.99
   9   2  -2  515.90   27.53
  -9  -2   2  543.97   24.18
   8   2  -2  129.73   16.74
  -8  -2   2  115.55   14.95
  -7  -2   2  123.98   11.46
   7   2  -2  141.84   13.76
   6   2  -2    5.41    5.78
   5   2  -2  515.92   20.32
  -5  -2   2  528.76   18.96
   4   2  -2   13.34    5.11
  -4  -2   2   14.46    5.42
   3   2  -2   61.08    6.59
  -3  -2   2   67.64    6.40
   2   2  -2   19.77    3.42
  -2  -2   2    9.92    3.40
  -1  -2   2  117.73    5.88
  -1   2  -2  137.21    6.51
   1  -2   2  138.52    6.78
   2  -2   2   11.71    4.52
   2  -2   2   25.82    5.50
   3  -2   2 1151.36   30.11
   3  -2   2 1118.75   29.51
   4  -2   2   22.99    6.83
   4  -2   2    8.81    5.87
   5  -2   2  275.53   16.12
   5  -2   2  276.35   16.34
   6  -2   2   82.76   13.21
   6  -2   2   58.13   12.28
   7  -2   2 1117.56   39.17
   7  -2   2 1113.05   38.33
   8  -2   2  146.56   19.09
   9  -2   2  345.15   24.31
  10  -2   2   47.96   15.75
  11  -2   2   70.95   19.22
  12  -2   2   -8.56   13.31
  13  -2   2   34.00   17.39
  14  -2   2   34.25   20.16
  15  -2   2  -21.40   13.97
  16  -2   2   30.15   23.01
  17  -2   2  -13.24   18.56
  18   1  -2  -19.82   19.09
  17   1  -2   43.49   22.44
  16   1  -2   31.04   19.87
  15   1  -2  153.85   27.35
  14   1  -2   82.30   20.16
  13   1  -2   19.03   16.18
  12   1  -2   44.43   17.11
  11   1  -2  467.86   30.13
 -10  -1   2  130.29   15.15
  10   1  -2  173.42   18.61
  -9  -1   2    5.17    8.96
   9   1  -2   32.21   11.34
   8   1  -2  619.24   28.51
   7   1  -2  143.81   13.66
   6   1  -2   -2.73    5.45
   5   1  -2  491.19   19.61
   4   1  -2   57.95    7.84
   3   1  -2  318.43   12.10
   2   1  -2  185.62    7.28
  -1  -1   2 1031.19   22.91
   1  -1   2   23.69    3.68
   1  -1   2   11.74    3.06
   2  -1   2   36.52    5.62
   2  -1   2   22.03    4.87
   3  -1   2 1964.76   42.67
   3  -1   2 1933.85   43.67
   4  -1   2 1557.67   38.77
   4  -1   2 1560.64   39.92
   5  -1   2  526.47   21.70
   5  -1   2  535.03   22.59
   6  -1   2  249.91   17.58
   6  -1   2  219.42   16.32
   7  -1   2   46.53   10.71
   7  -1   2   36.03   11.35
   8  -1   2  258.32   20.11
   8  -1   2  280.28   20.27
   9  -1   2    9.26    9.90
  10  -1   2  342.98   25.55
  11  -1   2  287.55   26.40
  12  -1   2    4.17   14.65
  13  -1   2    1.08   14.82
  14  -1   2  179.58   29.82
  15  -1   2    4.59   18.24
  16  -1   2  -18.64   15.77
  17  -1   2  -25.90   19.75
  18   0  -2  117.81   27.77
  17   0  -2   -9.65   14.70
  16   0  -2  228.90   32.97
  15   0  -2   28.58   18.51
  14   0  -2  196.80   28.32
  13   0  -2    1.78   12.20
  12   0  -2  193.01   21.82
 -11   0   2  -33.71   10.61
  11   0  -2   10.78   12.53
  10   0  -2  792.26   35.76
   9   0  -2  -11.55    7.08
   8   0  -2   97.09   15.17
   7   0  -2   -4.39    6.47
   6   0  -2  101.19   10.48
   5   0  -2    1.13    5.14
   4   0  -2 1135.09   29.39
   3   0  -2   -4.33    3.22
   1   0   2   -0.93    1.73
   1   0   2   -2.47    1.65
   2   0   2  169.88    9.05
   2   0   2  160.62    8.42
   3   0   2    4.32    5.15
   3   0   2   -0.88    5.30
   4   0   2 1382.25   36.73
   4   0   2 1343.58   34.86
   5   0   2   -1.08    5.25
   5   0   2   -0.03    4.62
   6   0   2 3729.20   82.22
   6   0   2 3640.41   78.74
   7   0   2  -17.92    6.98
   7   0   2   -8.31    7.37
   8   0   2  265.84   19.80
  -8   0  -2  242.12   12.44
   8   0   2  306.28   20.79
   9   0   2   -8.01    9.02
  10   0   2   54.39   15.81
  11   0   2    1.45   13.05
  12   0   2  238.17   30.06
  13   0   2  -12.20   14.13
  14   0   2  242.17   29.59
  15   0   2  -22.51   16.95
  16   0   2  -30.53   18.92
  17   0   2   -0.21   20.49
  18  -1  -2   -3.64   20.35
  17  -1  -2   17.61   19.90
  16  -1  -2   43.08   21.00
  15  -1  -2   94.57   23.42
  14  -1  -2  163.69   25.84
  13  -1  -2   -0.41   12.43
  12  -1  -2   17.38   14.60
  11  -1  -2  434.37   29.04
  10  -1  -2  147.94   20.38
   9  -1  -2   14.92    9.89
   8  -1  -2  621.28   28.13
   7  -1  -2  157.12   13.92
   6  -1  -2   -1.30    5.05
   5  -1  -2  476.03   18.95
   4  -1  -2   66.78    7.97
   3  -1  -2  325.66   12.06
   1   1   2   18.18    3.29
   1   1   2   16.88    3.30
   2   1   2   20.19    5.06
   2   1   2   19.64    4.59
   3   1   2 1959.17   43.97
   3   1   2 1913.45   41.34
   4   1   2 1543.59   39.48
   4   1   2 1453.00   36.61
   5   1   2  565.04   22.10
   5   1   2  595.49   24.00
   6   1   2  245.80   17.50
  -6  -1  -2  208.02    9.38
   6   1   2  216.34   15.70
  -7  -1  -2   44.14    6.70
   7   1   2   49.15   12.38
   7   1   2   18.14    9.61
  -8  -1  -2  260.14   12.11
   8   1   2  285.17   21.18
   8   1   2  275.61   19.76
   9   1   2    3.52    9.96
   9   1   2    8.38   11.00
  10   1   2  334.52   25.57
  11   1   2  284.86   25.58
  12   1   2   -8.03   13.53
  13   1   2    5.84   16.35
  14   1   2  164.63   29.08
  15   1   2   29.93   20.32
  16   1   2   -4.93   16.22
  17   1   2  -20.37   19.81
  18  -2  -2   13.64   19.67
  17  -2  -2   12.06   18.65
  16  -2  -2   18.32   19.32
  15  -2  -2  245.20   32.72
  14  -2  -2   22.46   15.66
  13  -2  -2  127.86   23.77
  12  -2  -2   58.24   17.94
  11  -2  -2  849.81   39.34
  10  -2  -2   41.37   13.55
   9  -2  -2  514.03   26.98
   8  -2  -2  122.68   16.66
   7  -2  -2  138.49   13.30
   6  -2  -2   -1.11    4.90
   5  -2  -2  524.28   19.78
   4  -2  -2   18.52    5.27
   3  -2  -2   55.33    5.96
  -1   2   2  114.70    5.21
   0   2   2  277.18    8.47
   1   2   2  135.70    6.34
   1   2   2  138.51    6.53
   2   2   2   14.28    4.60
   2   2   2   18.55    4.48
   3   2   2 1085.85   27.39
   3   2   2 1114.80   29.60
   4   2   2   13.53    5.72
   4   2   2   19.33    6.75
   5   2   2  275.47   15.03
   5   2   2  262.21   16.17
   6   2   2   89.83   12.74
  -6  -2  -2   51.61    5.46
   6   2   2   67.78   12.76
  -7  -2  -2 1060.07   25.30
   7   2   2 1109.21   36.87
   7   2   2 1053.05   38.42
   8   2   2  142.80   18.70
   8   2   2  135.69   17.81
   9   2   2  339.09   24.19
   9   2   2  286.68   21.27
  10   2   2   66.69   17.03
  11   2   2  108.16   21.31
  12   2   2  -21.69   10.76
  13   2   2   40.62   18.31
  14   2   2   32.65   19.32
  15   2   2   -0.90   18.35
  16   2   2   29.66   22.67
  17   2   2    1.97   21.44
  18  -3  -2  -15.77   19.77
  17  -3  -2  100.16   26.76
  16  -3  -2   29.95   20.22
  15  -3  -2  222.29   31.52
  14  -3  -2  137.77   24.85
  13  -3  -2  235.44   29.19
  12  -3  -2   -4.54   11.52
  11  -3  -2   39.14   15.81
  10  -3  -2    4.41   10.22
   9  -3  -2   31.14   11.26
   8  -3  -2  127.11   14.51
   7  -3  -2  206.74   15.44
   6  -3  -2  111.06   10.70
   5  -3  -2  118.78    9.76
   4  -3  -2  235.75   11.50
   3  -3  -2  170.00    8.68
   0   3   2  885.65   19.56
   1   3   2   42.55    4.22
   1   3   2   41.59    4.12
   2   3   2 5507.39   98.16
   2   3   2 5408.32   93.45
   3   3   2 1050.32   26.88
   3   3   2 1109.50   29.85
   4   3   2   96.05    9.92
   4   3   2  100.92    8.55
   5   3   2    4.24    5.66
   5   3   2   -0.74    5.92
   6   3   2   63.87   11.38
   6   3   2   49.83   11.83
  -6  -3  -2   54.38    5.89
  -7  -3  -2   69.55    7.54
   7   3   2   82.22   14.98
   7   3   2   80.04   13.31
   8   3   2  169.07   16.94
   8   3   2  173.24   17.42
   9   3   2   72.39   14.86
   9   3   2   79.07   16.12
  10   3   2   -6.20    7.78
  10   3   2   -1.74    8.94
  11   3   2  202.82   26.02
  12   3   2   62.96   19.62
  13   3   2   11.36   14.86
  14   3   2   25.78   16.81
  15   3   2   68.27   22.67
  16   3   2   33.24   22.20
  17   3   2   83.73   27.52
  18  -4  -2   20.91   22.17
  17  -4  -2   26.03   21.91
  16  -4  -2   95.57   24.90
  15  -4  -2    9.26   17.95
  14  -4  -2  124.87   24.03
  13  -4  -2   48.31   18.70
  12  -4  -2   37.93   16.64
  11  -4  -2  931.13   41.50
  10  -4  -2  608.17   31.31
   9  -4  -2  370.05   23.40
   8  -4  -2   27.96   10.59
   7  -4  -2 1798.73   48.68
   6  -4  -2   86.57   11.31
   5  -4  -2  801.91   25.30
   4  -4  -2  488.75   17.15
   3  -4  -2   67.39    5.82
  -2   4   2   94.30    5.04
  -1   4   2  319.23   10.40
   0   4   2  790.01   18.43
   1   4   2   82.00    5.72
   1   4   2   86.66    5.82
   2   4   2   33.67    5.50
   2   4   2   34.28    6.10
   3   4   2 2490.21   49.81
   3   4   2 2521.50   54.01
   4   4   2  169.42   12.21
   4   4   2  167.39   10.44
  -5  -4  -2   22.83    3.80
   5   4   2    9.55    7.26
   5   4   2   15.29    6.50
  -6  -4  -2  514.30   14.62
   6   4   2  566.10   23.09
   6   4   2  551.02   25.47
  -7  -4  -2  977.40   23.96
   7   4   2 1058.32   38.57
   7   4   2 1040.68   35.04
   8   4   2  446.03   26.13
   8   4   2  452.80   24.58
   9   4   2   17.03   11.83
   9   4   2   47.96   13.75
  10   4   2    7.66   11.19
  10   4   2   16.98   11.23
  11   4   2  169.56   24.73
  12   4   2   -5.77   14.40
  13   4   2  120.74   25.42
  14   4   2   52.23   21.48
  15   4   2    1.35   18.10
  16   4   2    0.05   20.42
  17   4   2   20.71   22.87
  17  -5  -2   40.16   21.36
  16  -5  -2   12.61   18.59
  15  -5  -2   69.55   22.35
  14  -5  -2  129.10   24.38
  13  -5  -2   29.86   16.98
  12  -5  -2  319.70   26.60
  11  -5  -2  792.09   38.30
  10  -5  -2  252.64   21.83
   9  -5  -2    8.20    9.73
   8  -5  -2 2932.42   71.61
   7  -5  -2  133.47   13.12
   6  -5  -2   81.17   11.16
   5  -5  -2  235.83   13.20
   4  -5  -2  530.54   17.77
  -3   5   2 1115.11   25.84
  -2   5   2 1482.22   29.71
  -1   5   2  219.78    8.98
   0   5   2 1001.16   22.40
   0   5   2  977.48   21.29
   1   5   2 2920.44   53.05
   1   5   2 2894.64   55.12
   2   5   2  133.81    8.87
   2   5   2  143.96    7.88
   3   5   2 2045.97   46.65
   3   5   2 2033.23   42.41
  -4  -5  -2  707.61   16.60
   4   5   2  728.43   25.48
   4   5   2  719.24   22.37
   5   5   2   96.71    9.28
  -5  -5  -2   87.48    5.57
   5   5   2   95.02   10.49
  -6  -5  -2  106.86    6.69
   6   5   2  103.50   12.82
   6   5   2  119.52   15.67
   7   5   2  561.91   25.07
   7   5   2  561.30   27.76
  -7  -5  -2  535.72   16.07
   8   5   2   -4.26    9.24
   8   5   2    1.29    8.48
   9   5   2   -2.90    8.58
   9   5   2  -21.23    7.75
  10   5   2  242.64   22.74
  10   5   2  271.07   21.30
  11   5   2   41.49   16.85
  12   5   2   35.75   18.29
  13   5   2  -14.28   13.99
  14   5   2  169.00   28.56
  15   5   2   49.74   21.54
  16   5   2    2.35   19.16
  17   5   2   61.91   27.20
  16  -6  -2  165.76   29.78
  15  -6  -2   61.41   21.23
  14  -6  -2   77.11   21.91
  13  -6  -2   39.36   16.47
  12  -6  -2  457.84   31.32
  11  -6  -2  517.47   31.76
  10  -6  -2   37.61   13.14
   9  -6  -2  295.21   21.04
   8  -6  -2  168.58   16.10
   7  -6  -2   14.48    8.79
   6  -6  -2  192.11   13.85
  -4   6   2  773.72   22.50
  -3   6   2  211.19    9.55
  -2   6   2  788.76   18.86
  -1   6   2   39.15    4.09
  -1   6   2   47.94    5.31
   0   6   2 1577.29   32.30
   0   6   2 1541.33   31.48
   1   6   2 1218.57   26.77
   1   6   2 1184.92   27.76
   2   6   2   10.29    4.73
   2   6   2   12.15    4.06
   3   6   2   41.66    6.71
   3   6   2   25.18    6.60
   4   6   2   76.68   10.55
   4   6   2   80.20    7.98
  -5  -6  -2  546.76   14.96
   5   6   2  549.87   20.65
   5   6   2  561.62   24.35
  -6  -6  -2  102.66    7.01
   6   6   2   91.94   14.69
   6   6   2  120.44   11.28
   7   6   2   48.77   11.73
   7   6   2   40.24   11.02
  -7  -6  -2   40.85    6.53
   8   6   2   20.63   11.53
   8   6   2   15.96   10.51
   9   6   2   35.36   12.38
   9   6   2   59.43   15.43
  10   6   2   26.56   12.68
  10   6   2   33.53   15.10
  11   6   2   38.64   16.94
  11   6   2   20.45   13.49
  12   6   2    0.77   14.70
  13   6   2   -0.07   14.57
  14   6   2   32.93   20.59
  15   6   2   -5.62   18.05
  16   6   2   77.06   24.79
  17   6   2    8.32   21.34
 -17   7   2  345.15  246.73
  14  -7  -2   11.18   16.77
  13  -7  -2    5.85   13.56
  12  -7  -2  176.37   23.78
  11  -7  -2  122.93   21.81
  10  -7  -2  246.92   21.21
   9  -7  -2  129.59   18.15
   8  -7  -2  386.68   22.32
   7  -7  -2  404.65   21.35
  -6   7   2  729.02   26.17
  -5   7   2  674.27   22.81
  -4   7   2   27.33    5.97
  -3   7   2 1063.99   25.88
  -2   7   2  130.82    7.26
  -1   7   2 1878.76   39.27
  -1   7   2 1960.71   37.80
   0   7   2   66.37    5.86
   0   7   2   65.35    6.02
   1   7   2    0.21    3.22
   1   7   2   -3.46    3.20
   2   7   2   47.65    6.14
   2   7   2   30.10    6.58
   3   7   2  634.65   19.09
   3   7   2  600.90   21.95
   4   7   2  220.16   11.98
   4   7   2  213.40   14.05
  -5  -7  -2  782.33   19.62
   5   7   2  781.79   25.27
   5   7   2  750.01   28.93
   6   7   2 1463.70   45.43
  -6  -7  -2 1458.79   31.99
   6   7   2 1485.53   40.19
   7   7   2    1.15    6.62
  -7  -7  -2    5.33    4.80
   7   7   2    0.89    9.17
   8   7   2  163.09   15.89
   8   7   2  223.86   19.75
   9   7   2   -1.81    9.05
   9   7   2   -7.68    8.47
  10   7   2  172.25   21.18
  10   7   2  157.63   23.39
  11   7   2    8.36   14.44
  11   7   2   -2.71   10.99
  12   7   2  181.17   26.30
  13   7   2    4.69   17.16
  14   7   2   31.22   18.49
  15   7   2   -2.54   17.95
  16   7   2   36.46   23.03
  17   7   2   39.00   23.16
 -17   8   2   13.74  114.35
 -16   8   2  109.88   71.30
 -15   8   2  -42.07   41.62
  12  -8  -2  147.06   21.97
  11  -8  -2 1148.85   46.10
  10  -8  -2  110.22   18.79
  -7   8   2 1769.68   48.06
  -6   8   2   -9.22    5.41
  -5   8   2  718.14   23.97
  -4   8   2   16.09    5.46
  -3   8   2  764.42   21.18
  -2   8   2  604.91   17.22
  -1   8   2 1299.18   30.50
  -1   8   2 1353.46   28.87
   0   8   2  221.08   10.37
   0   8   2  215.40    9.52
   1   8   2  138.55    8.69
   1   8   2  136.27    8.07
   2   8   2  490.54   18.15
   2   8   2  513.79   16.37
   3   8   2  370.51   14.40
   3   8   2  345.85   16.60
   4   8   2  372.99   15.51
   4   8   2  365.67   18.53
   5   8   2   27.73    8.19
   5   8   2   18.32    7.21
   6   8   2  323.50   20.74
  -6  -8  -2  339.48   12.75
   6   8   2  368.56   18.42
   7   8   2  490.94   22.47
   7   8   2  431.49   24.44
  -7  -8  -2  442.15   15.15
   8   8   2   66.72   15.05
   8   8   2   58.86   12.65
   9   8   2   -9.10    7.59
   9   8   2   -6.04    9.41
  10   8   2    1.20   11.39
  10   8   2    1.10   10.57
  11   8   2  368.79   26.18
  11   8   2  364.60   29.11
  12   8   2   68.39   20.91
  13   8   2   85.65   21.57
  14   8   2   50.74   22.83
  15   8   2   32.18   20.81
  16   8   2  123.42   29.59
  17   8   2   61.31   25.84
 -17   9   2 1049.55  159.31
 -16   9   2   67.30   63.49
 -15   9   2  331.80   62.56
 -14   9   2    3.90   29.63
 -13   9   2  301.25   42.19
 -12   9   2  247.10   34.56
 -11   9   2  746.30   41.56
 -10   9   2   -1.88   11.74
  -9   9   2   41.53   13.40
  -8   9   2  302.10   20.24
  -7   9   2  151.68   13.88
  -6   9   2  106.09   12.73
  -5   9   2  353.22   16.49
  -4   9   2   24.10    6.17
  -3   9   2 1478.08   34.10
  -2   9   2   22.84    5.17
  -1   9   2 1516.22   34.37
  -1   9   2 1468.87   32.16
   0   9   2 2891.71   55.29
   0   9   2 2853.72   55.56
   1   9   2  997.30   24.97
   1   9   2 1022.74   26.72
   2   9   2   -2.45    4.30
   2   9   2    1.07    3.98
   3   9   2 1562.85   40.64
   3   9   2 1532.21   35.52
   4   9   2  252.17   15.98
   4   9   2  277.49   13.28
   5   9   2    1.55    5.87
   5   9   2   -2.88    7.13
   6   9   2   56.81   10.19
   6   9   2   69.82   13.93
  -7  -9  -2   43.84    7.09
   7   9   2   22.25    9.47
   7   9   2   27.32   11.54
   8   9   2  269.77   18.36
   8   9   2  254.90   21.69
   9   9   2   43.94   13.21
   9   9   2   50.43   15.49
  10   9   2   -3.30    9.04
  10   9   2    2.28   10.96
  11   9   2   25.52   14.25
  11   9   2   24.78   13.39
  12   9   2    1.70   14.58
  13   9   2   50.50   21.11
  14   9   2   25.37   19.86
  15   9   2  149.77   30.12
  16   9   2   56.05   23.67
  17   9   2   68.81   27.71
 -18  10   2  -26.87  162.25
 -17  10   2  189.83   91.72
 -16  10   2  412.74   78.16
 -15  10   2    3.67   34.64
 -14  10   2    4.44   24.87
 -13  10   2  284.73   39.06
 -12  10   2  274.45   29.98
 -11  10   2    7.28   15.92
 -10  10   2   32.40   14.16
  -9  10   2  256.93   20.28
  -8  10   2  404.29   22.83
  -7  10   2  388.68   20.73
  -6  10   2   20.33    8.16
  -5  10   2  794.25   26.21
  -4  10   2  770.97   23.98
  -3  10   2  452.23   16.50
  -2  10   2   77.99    7.09
  -1  10   2  427.69   14.62
  -1  10   2  443.42   16.29
   0  10   2 1131.11   28.06
   0  10   2 1164.50   28.22
   1  10   2  674.98   21.22
   1  10   2  676.60   20.00
   2  10   2   -1.52    4.52
   2  10   2   -3.86    3.39
   3  10   2  114.19    8.59
   3  10   2  119.16   11.05
   4  10   2   -6.16    5.55
   4  10   2    1.98    5.01
   5  10   2 1364.08   35.79
   5  10   2 1368.41   42.57
   6  10   2  138.17   12.33
   7  10   2  611.86   30.30
   7  10   2  629.49   25.87
   8  10   2    3.76   10.42
   8  10   2    7.82    8.09
   9  10   2  646.45   30.10
   9  10   2  606.14   32.84
  10  10   2   -9.02    9.74
  10  10   2   10.55   13.89
  11  10   2  344.41   25.79
  11  10   2  304.03   27.99
  12  10   2   16.09   16.53
  13  10   2    8.97   15.49
  14  10   2    0.43   18.36
  15  10   2    1.28   18.13
  16  10   2   27.17   22.06
  17  10   2   38.56   25.21
 -18  11   2 -120.73  109.07
 -17  11   2  -36.54   59.46
 -16  11   2  130.27   52.97
 -15  11   2   13.92   32.75
 -14  11   2   96.47   32.39
 -13  11   2  302.44   39.82
 -12  11   2  430.43   35.40
 -11  11   2    8.69   16.00
 -10  11   2  223.13   26.33
  -9  11   2   -7.15    8.46
  -8  11   2  395.34   22.68
  -7  11   2   57.91   11.46
  -6  11   2  467.15   21.09
  -5  11   2   31.64    8.72
  -4  11   2  790.55   25.16
  -3  11   2   80.48    8.20
  -2  11   2   25.83    6.08
  -1  11   2   32.45    6.46
  -1  11   2   44.88    6.56
   0  11   2  154.10    9.53
   0  11   2  175.40    9.84
   1  11   2  762.43   22.16
   1  11   2  780.41   23.98
   2  11   2   70.64    9.83
   2  11   2   62.85    8.54
   3  11   2   49.37    9.72
   3  11   2   44.87    7.80
   4  11   2  369.93   16.08
   4  11   2  341.34   19.47
   5  11   2 1339.61   42.90
   5  11   2 1433.40   36.98
   6  11   2  574.31   28.20
   6  11   2  544.28   22.33
   7  11   2   32.46   12.36
   7  11   2   33.02    9.82
   8  11   2  428.83   27.36
   8  11   2  433.73   23.06
   9  11   2   42.79   15.25
   9  11   2   47.32   12.62
  10  11   2  425.28   30.53
  10  11   2  367.14   24.98
  11  11   2   12.92   15.60
  12  11   2  115.21   24.41
  13  11   2  391.40   33.64
  14  11   2   30.26   21.49
  15  11   2   26.36   20.05
  16  11   2   20.32   22.69
  17  11   2   56.02   26.52
 -18  12   2  400.93  108.30
 -17  12   2   33.62   48.65
 -16  12   2  398.94   66.61
 -15  12   2  -12.06   27.77
 -14  12   2  358.47   38.41
 -13  12   2   62.83   23.63
 -12  12   2   23.36   19.20
 -11  12   2  497.34   32.34
 -10  12   2   24.02   13.84
  -9  12   2   23.01   11.63
  -8  12   2    6.27    8.85
  -7  12   2   96.16   13.97
  -6  12   2  253.98   16.55
  -5  12   2    7.48    7.16
  -4  12   2  593.87   21.78
  -3  12   2   66.82    8.92
  -2  12   2 1486.26   38.43
  -2  12   2 1532.54   36.05
  -1  12   2  172.75   10.96
  -1  12   2  175.75   10.35
   0  12   2  319.20   14.12
   0  12   2  287.19   13.34
   1  12   2 1612.20   39.28
   1  12   2 1565.61   36.40
   2  12   2  533.59   21.07
   2  12   2  516.64   18.05
   3  12   2   36.37    7.55
   3  12   2   38.23    9.42
   4  12   2 1146.42   30.85
   4  12   2 1066.62   36.09
   5  12   2   49.37   12.10
   5  12   2   26.61    8.17
   6  12   2  250.68   15.77
   6  12   2  282.75   20.71
   7  12   2    2.74    6.97
   7  12   2   -4.34    9.53
   8  12   2   16.59   12.13
   8  12   2   25.00   10.59
   9  12   2   68.15   17.60
   9  12   2   47.59   13.63
  10  12   2   96.35   17.80
  10  12   2   88.93   19.26
  11  12   2  -18.01   13.02
  12  12   2  262.37   32.79
  13  12   2   28.05   19.33
  14  12   2  180.07   31.17
  15  12   2   -3.34   17.96
  16  12   2  119.04   30.40
 -17  13   2  307.69   68.30
 -16  13   2   83.02   40.55
 -15  13   2  313.36   48.19
 -14  13   2  145.51   33.95
 -13  13   2   44.36   23.09
 -12  13   2   26.09   18.91
 -11  13   2   15.37   16.28
 -10  13   2  417.28   27.27
  -9  13   2    2.12    9.19
  -8  13   2  111.91   15.92
  -7  13   2  230.08   16.60
  -6  13   2  108.10   13.56
  -5  13   2  685.38   25.37
  -4  13   2 2553.58   56.88
  -3  13   2   80.01   10.00
  -2  13   2  516.11   20.29
  -2  13   2  470.29   17.92
  -1  13   2  332.56   14.63
  -1  13   2  330.74   15.46
   0  13   2 1902.59   43.34
   0  13   2 1968.72   44.41
   1  13   2  307.00   14.31
   1  13   2  294.51   15.22
   2  13   2   20.43    7.96
   2  13   2   13.50    6.51
   3  13   2  441.20   21.24
   3  13   2  454.38   17.58
   4  13   2 1014.03   29.31
   4  13   2  994.00   34.99
   5  13   2   99.69   12.34
   5  13   2   92.95   14.81
   6  13   2  465.30   20.97
   6  13   2  472.15   26.48
   7  13   2   62.48   11.90
   7  13   2   38.47   13.70
   8  13   2 1192.83   39.37
   8  13   2 1185.43   46.64
   9  13   2   17.72   10.43
   9  13   2    9.70   12.97
  10  13   2  277.58   26.40
  11  13   2  -11.96   13.30
  12  13   2  150.27   25.09
  13  13   2   -5.15   14.45
  14  13   2    3.15   17.89
  15  13   2   41.74   24.05
  16  13   2    4.87   23.31
 -17  14   2   18.13   42.64
 -16  14   2   37.78   31.34
 -15  14   2  269.16   44.48
 -14  14   2  267.21   39.06
 -13  14   2  132.78   28.30
 -12  14   2   -8.31   17.79
 -11  14   2  321.05   26.59
 -10  14   2  146.19   21.36
  -9  14   2  427.10   25.85
  -8  14   2  245.23   18.57
  -7  14   2   70.77   13.55
  -6  14   2  106.86   12.09
  -5  14   2  560.55   23.01
  -4  14   2   29.13    8.58
  -3  14   2 1167.80   32.66
  -2  14   2 1110.17   32.92
  -2  14   2 1054.35   29.96
  -1  14   2   65.60    9.09
  -1  14   2   66.87    9.46
   0  14   2 1546.76   38.73
   0  14   2 1570.36   38.11
   1  14   2  552.50   19.92
   1  14   2  542.17   21.53
   2  14   2  748.91   27.02
   2  14   2  734.65   23.32
   3  14   2   63.05   11.82
   3  14   2   70.95    9.97
   4  14   2 1681.14   41.13
   4  14   2 1624.15   47.75
   5  14   2 1175.73   41.04
   5  14   2 1166.02   33.67
   6  14   2   -2.98    9.56
   6  14   2    8.94    7.72
   7  14   2  430.30   21.44
   7  14   2  439.03   27.23
   8  14   2   70.57   16.45
   8  14   2   69.52   13.94
   9  14   2 1036.23   38.21
   9  14   2  971.84   44.46
  10  14   2   65.26   18.41
  11  14   2   47.59   19.75
  12  14   2  175.99   28.79
  13  14   2   40.91   22.06
  14  14   2   -8.30   19.05
  15  14   2    7.02   20.45
  16  14   2   46.12   26.67
 -17  15   2  298.22   63.25
 -16  15   2   96.69   36.86
 -15  15   2  198.42   39.47
 -14  15   2  233.33   36.10
 -13  15   2  285.62   35.18
 -12  15   2  -10.89   15.78
 -11  15   2  113.32   22.98
 -10  15   2   10.98   13.49
  -9  15   2   36.74   13.03
  -8  15   2  101.96   16.16
  -7  15   2   69.44   12.81
  -6  15   2  441.00   22.47
  -5  15   2  595.32   24.50
  -4  15   2  212.13   14.30
  -3  15   2   52.08    9.53
  -2  15   2    1.43    6.30
  -1  15   2 1191.98   33.05
  -1  15   2 1211.02   34.15
   1  15   2 4675.90   88.53
   1  15   2 4789.23   94.23
   2  15   2   -6.88    6.41
   2  15   2   -9.25    5.56
   3  15   2  138.30   10.88
   3  15   2  142.54   13.48
   4  15   2  385.34   17.86
   4  15   2  332.63   20.66
   5  15   2 1272.01   43.94
   5  15   2 1361.49   37.12
   6  15   2    3.54    9.15
   6  15   2    2.43    7.53
   7  15   2   24.60   10.62
   7  15   2   34.79   10.61
   8  15   2   30.19   10.97
   8  15   2   65.92   16.93
   9  15   2   64.12   18.58
  10  15   2   35.94   17.23
  11  15   2   14.13   16.29
  12  15   2  124.60   26.95
  13  15   2  319.00   32.27
  14  15   2   -4.04   19.71
  15  15   2   18.55   22.80
  16  15   2   -2.52   22.45
 -17  16   2   -4.89   32.41
 -16  16   2  118.84   36.62
 -15  16   2   21.62   26.43
 -14  16   2  276.05   37.99
 -13  16   2   14.25   17.68
 -12  16   2  -19.83   14.07
 -11  16   2   -5.76   13.99
 -10  16   2   23.47   14.40
  -9  16   2  595.66   30.55
  -8  16   2   -9.32    8.66
  -7  16   2  827.97   32.73
  -6  16   2  236.75   16.77
  -5  16   2  533.14   23.78
  -4  16   2   -9.81    5.86
  -3  16   2 2074.87   50.01
  -2  16   2    8.42    7.39
  -2  16   2    0.17    7.22
  -1  16   2  118.94   11.74
  -1  16   2  111.39   10.38
   0  16   2  627.90   22.81
   0  16   2  622.54   23.29
   1  16   2  101.99   11.11
   2  16   2   12.63    8.79
   2  16   2   14.99    7.21
   3  16   2  267.92   17.71
   3  16   2  260.57   14.16
   4  16   2  316.68   20.50
   4  16   2  352.57   17.36
   5  16   2  562.03   28.68
   5  16   2  569.21   23.03
   6  16   2  172.97   18.13
   6  16   2  169.02   13.62
   7  16   2   32.94   13.69
   7  16   2   29.26   10.25
   8  16   2   32.67   11.12
   8  16   2   38.09   14.60
   9  16   2  362.50   28.61
  10  16   2   31.66   17.40
  11  16   2   70.93   22.22
  12  16   2   88.60   24.37
  13  16   2  126.84   28.40
  14  16   2   36.24   24.00
  15  16   2   -3.57   21.70
  16  16   2   -5.53   21.22
 -17  17   2  -29.81   31.44
 -16  17   2  -25.45   26.20
 -15  17   2   11.38   23.91
 -14  17   2   60.12   24.94
 -13  17   2   59.01   22.26
 -12  17   2    3.37   14.41
 -11  17   2  212.60   23.75
 -10  17   2  967.64   41.66
  -9  17   2    3.13   12.58
  -8  17   2   21.15   12.67
  -7  17   2  109.81   16.10
  -6  17   2  324.89   19.77
  -5  17   2  179.00   14.83
  -4  17   2  186.31   14.04
  -3  17   2  620.06   24.10
  -2  17   2   70.99   11.08
  -2  17   2   82.87   12.05
  -1  17   2   90.53   11.68
  -1  17   2   74.56   11.77
   0  17   2   85.54   11.60
   0  17   2   86.52   11.43
   1  17   2  722.14   25.07
   1  17   2  783.46   28.14
   2  17   2  318.05   15.80
   2  17   2  310.36   18.51
   3  17   2   81.33   11.36
   3  17   2   66.42   12.72
   4  17   2  358.40   17.85
   4  17   2  368.65   22.23
   5  17   2  149.15   19.33
   5  17   2  115.35   12.01
   6  17   2  245.91   20.05
   6  17   2  258.84   16.38
   7  17   2   19.40    9.09
   7  17   2   15.86   11.74
   8  17   2  515.17   32.19
   9  17   2    2.51   10.74
  10  17   2  135.96   24.54
  11  17   2   -3.37   15.81
  12  17   2   59.75   21.32
  13  17   2   53.91   22.94
  14  17   2   21.43   22.66
  15  17   2   37.83   24.73
  16  17   2   -3.67   21.29
 -17  18   2  -30.92   31.54
 -16  18   2   60.87   32.94
 -15  18   2  147.67   33.01
 -14  18   2  318.87   38.99
 -13  18   2   -6.73   16.93
 -12  18   2   63.35   20.65
 -11  18   2   12.97   15.88
 -10  18   2  409.74   28.04
  -9  18   2  -13.59   11.57
  -8  18   2   -5.64   10.57
  -7  18   2  157.24   16.14
  -6  18   2  266.69   18.68
  -5  18   2   62.15   12.15
  -4  18   2  833.32   30.01
  -3  18   2   35.22    9.57
  -2  18   2 2274.70   54.82
  -2  18   2 2357.30   58.08
  -1  18   2  380.78   19.76
  -1  18   2  391.04   18.89
   0  18   2 1037.40   31.69
   0  18   2 1025.02   32.92
   1  18   2  481.82   22.40
   1  18   2  507.02   20.67
   2  18   2 1206.39   33.86
   2  18   2 1170.35   38.20
   3  18   2   83.55   11.49
   3  18   2   67.66   13.20
   4  18   2  903.79   35.63
   4  18   2  868.12   28.97
   5  18   2   15.65   10.73
   5  18   2    2.59    7.45
   6  18   2    5.29    7.68
   6  18   2   -0.42   10.08
   7  18   2   -2.67   10.58
   7  18   2   -3.45    7.39
   8  18   2   85.69   20.09
   9  18   2  132.50   24.21
  10  18   2   23.92   17.54
  11  18   2   49.35   20.88
  12  18   2   77.95   22.98
  13  18   2    4.38   20.52
  14  18   2   54.38   25.58
  15  18   2  -19.73   20.00
  16  18   2  183.23   36.97
 -17  19   2   33.67   39.10
 -16  19   2   63.61   31.70
 -15  19   2   66.81   27.65
 -14  19   2    3.74   20.18
 -13  19   2   62.36   22.71
 -12  19   2    4.99   16.87
 -11  19   2   70.00   19.34
 -10  19   2  781.91   37.86
  -9  19   2   -1.33   13.39
  -8  19   2  206.54   19.22
  -7  19   2   18.09   12.12
  -6  19   2 1060.87   37.74
  -5  19   2  447.40   23.05
  -4  19   2  245.10   16.75
  -3  19   2  500.23   25.52
  -3  19   2  501.03   23.13
  -2  19   2  126.05   12.15
  -1  19   2  368.61   19.62
  -1  19   2  368.22   18.82
   0  19   2   69.63   10.81
   1  19   2  777.60   29.90
   1  19   2  779.58   26.73
   2  19   2 1001.11   30.93
   2  19   2 1000.30   35.51
   3  19   2   66.25   13.48
   3  19   2   51.72   10.01
   4  19   2    0.85    7.18
   4  19   2   -2.26    8.62
   5  19   2    8.57   10.30
   5  19   2   10.71    7.89
   6  19   2  361.07   25.57
   6  19   2  337.01   19.59
   7  19   2  -14.85   10.52
   8  19   2  159.30   24.45
   9  19   2   11.54   15.10
  10  19   2   55.70   19.99
  11  19   2   -3.08   17.04
  12  19   2  305.70   31.63
  13  19   2   84.63   27.51
  14  19   2   -7.57   19.49
  15  19   2    5.19   22.68
  16  19   2   32.84   27.35
 -16  20   2   79.30   27.43
 -15  20   2   48.09   25.28
 -14  20   2   -9.89   19.14
 -13  20   2   48.63   22.31
 -12  20   2  -16.70   15.63
 -11  20   2   32.71   17.53
 -10  20   2  220.95   23.30
  -9  20   2  776.75   36.62
  -8  20   2   15.46   13.64
  -7  20   2  815.34   34.43
  -6  20   2   67.37   14.40
  -5  20   2  306.96   20.18
  -4  20   2   -8.61    7.90
  -3  20   2 1007.90   34.62
  -3  20   2 1142.06   39.59
  -2  20   2  112.59   12.24
  -2  20   2  129.60   16.82
  -1  20   2  352.48   19.94
  -1  20   2  308.66   17.89
   0  20   2   70.12   12.35
   0  20   2   85.75   13.28
   1  20   2  215.02   14.97
   1  20   2  249.35   17.99
   2  20   2  779.89   31.63
   2  20   2  811.02   27.50
   3  20   2  100.23   12.64
   3  20   2  109.83   16.48
   4  20   2  152.69   13.48
   4  20   2  178.04   17.61
   5  20   2  318.38   18.54
   5  20   2  303.16   22.87
   6  20   2    4.74   11.84
   6  20   2   12.83    9.36
   7  20   2   10.94   13.37
   8  20   2    6.11   13.41
   9  20   2  377.47   30.62
  10  20   2   85.43   23.06
  11  20   2  100.13   26.50
  12  20   2   -2.78   16.03
  13  20   2   78.67   26.41
  14  20   2  -32.97   18.43
  15  20   2   39.61   26.39
 -16  21   2   28.64   25.40
 -15  21   2  121.66   30.55
 -14  21   2   -9.54   18.39
 -13  21   2  186.04   30.26
 -12  21   2    1.32   16.83
 -11  21   2  469.59   31.41
 -10  21   2  107.59   21.47
  -9  21   2   59.20   18.04
  -8  21   2   -2.21   13.38
  -7  21   2   18.25   12.29
  -6  21   2   25.29   12.59
  -5  21   2  289.42   20.49
  -4  21   2   56.11   12.96
  -3  21   2 1294.82   40.90
  -3  21   2 1408.49   45.62
  -2  21   2  191.03   15.88
  -2  21   2  174.44   16.43
  -1  21   2  443.08   22.34
  -1  21   2  465.24   22.67
   0  21   2   40.63   11.63
   0  21   2   18.77    8.83
   1  21   2 1086.10   37.56
   1  21   2 1165.63   35.07
   2  21   2   92.08   13.00
   2  21   2   96.06   15.37
   3  21   2 1112.00   34.35
   3  21   2 1103.88   40.70
   4  21   2    3.58   10.08
   4  21   2    2.70    7.91
   5  21   2  196.55   15.58
   5  21   2  220.41   20.49
   6  21   2  105.19   20.04
   7  21   2   15.71   13.98
   8  21   2   80.18   20.59
   9  21   2  114.61   24.24
  10  21   2   -6.58   16.40
  11  21   2   34.34   20.87
  12  21   2   -3.95   16.13
  13  21   2   96.16   28.91
  14  21   2  -21.66   19.84
  15  21   2  106.11   31.19
 -16  22   2   52.78   29.22
 -15  22   2   13.73   18.69
 -14  22   2   23.18   22.08
 -13  22   2   44.58   22.01
 -12  22   2   37.13   19.33
 -11  22   2   13.15   16.04
 -10  22   2  215.39   22.99
  -9  22   2  207.14   26.47
  -8  22   2   45.62   16.83
  -7  22   2  214.92   20.06
  -6  22   2   40.57   13.69
  -5  22   2  175.75   20.24
  -4  22   2  502.38   24.97
  -3  22   2  468.79   26.02
  -3  22   2  425.38   23.11
  -2  22   2 1403.70   42.52
  -2  22   2 1415.74   45.25
  -1  22   2  337.08   19.79
  -1  22   2  383.27   21.22
   0  22   2   75.83   13.41
   0  22   2   64.49   12.12
   1  22   2  260.39   16.91
   1  22   2  286.61   20.00
   2  22   2  692.68   26.87
   2  22   2  692.47   31.18
   3  22   2   48.55   11.80
   3  22   2   57.96   13.58
   4  22   2  102.20   18.37
   4  22   2   98.65   14.51
   5  22   2  475.22   23.56
   5  22   2  469.25   29.24
   6  22   2  163.08   22.89
   7  22   2  413.64   29.96
   8  22   2  128.45   24.23
   9  22   2  279.72   27.96
  10  22   2   -5.49   16.77
  11  22   2  133.36   28.22
  12  22   2   14.82   18.78
  13  22   2    0.15   21.09
  14  22   2    4.02   22.53
  15  22   2   33.08   23.72
 -16  23   2  -10.96   27.25
 -15  23   2   -5.97   20.38
 -14  23   2  -35.25   15.89
 -13  23   2    3.21   19.11
 -12  23   2   95.97   23.16
 -11  23   2   -9.03   14.66
 -10  23   2  262.71   24.54
  -9  23   2    5.46   15.02
  -8  23   2   99.29   20.82
  -7  23   2   -5.11   12.50
  -6  23   2  867.16   35.99
  -5  23   2  -18.50    9.71
  -4  23   2  148.95   18.60
  -3  23   2   43.55   12.91
  -3  23   2   40.49   12.21
  -2  23   2  394.55   22.11
  -2  23   2  431.31   24.62
  -1  23   2  119.96   16.55
  -1  23   2  115.77   15.69
   0  23   2   19.55   10.02
   0  23   2   48.19   11.87
   1  23   2  257.20   19.09
   1  23   2  245.91   16.57
   2  23   2  668.00   31.63
   2  23   2  655.54   26.27
   3  23   2  149.19   14.31
   3  23   2  153.37   17.22
   4  23   2   19.51   12.58
   4  23   2   11.46    9.55
   5  23   2  348.12   26.21
   6  23   2  603.77   34.54
   7  23   2   25.77   15.07
   8  23   2  192.65   28.26
   9  23   2   56.11   20.27
  10  23   2  162.34   28.76
  11  23   2    7.49   19.09
  12  23   2  136.41   30.63
  13  23   2   17.29   22.26
  14  23   2  -20.97   22.35
  15  23   2   18.76   23.69
 -15  24   2   27.04   25.82
 -14  24   2   36.60   23.45
 -13  24   2   13.74   19.48
 -12  24   2   29.05   19.12
 -11  24   2    7.44   16.40
 -10  24   2  167.95   25.64
  -9  24   2  -27.97   13.09
  -8  24   2  -27.27   13.49
  -7  24   2   72.24   18.29
  -6  24   2   20.73   12.46
  -5  24   2   -2.08   11.59
  -4  24   2  139.32   18.45
  -4  24   2  149.02   21.35
  -3  24   2  112.39   16.21
  -3  24   2   82.63   16.07
  -2  24   2  439.63   23.62
  -2  24   2  421.64   24.52
  -1  24   2  109.34   16.10
  -1  24   2  120.99   16.61
   0  24   2  716.72   29.04
   0  24   2  705.38   30.50
   1  24   2   31.77   10.63
   1  24   2   47.71   13.28
   2  24   2  981.06   38.96
   2  24   2 1033.46   34.41
   3  24   2   99.98   17.77
   3  24   2  107.34   15.14
   4  24   2  751.89   36.35
   4  24   2  738.46   29.19
   5  24   2   55.31   15.69
   6  24   2   82.76   19.24
   7  24   2    9.61   13.88
   8  24   2   19.41   17.16
   9  24   2    7.31   15.25
  10  24   2   85.58   22.18
  11  24   2   42.53   21.60
  12  24   2  108.18   29.51
  13  24   2   12.09   19.93
  14  24   2   57.32   27.81
 -15  25   2   35.86   26.65
 -14  25   2   -8.31   20.19
 -13  25   2   11.18   18.53
 -12  25   2  126.93   25.93
 -11  25   2  169.85   26.99
 -10  25   2  147.16   24.86
  -9  25   2  -14.30   14.90
  -8  25   2  188.23   25.10
  -7  25   2  -18.96   12.85
  -6  25   2  126.21   19.98
  -5  25   2    9.66   12.35
  -4  25   2   -8.78    9.63
  -4  25   2   -3.55   10.71
  -3  25   2  463.90   27.39
  -3  25   2  484.01   25.30
  -2  25   2  194.47   16.91
  -2  25   2  166.47   17.04
  -1  25   2   27.33   11.72
  -1  25   2   52.88   12.98
   0  25   2   63.09   13.67
   0  25   2   68.08   13.22
   1  25   2  475.89   26.63
   1  25   2  514.93   24.60
   2  25   2   52.48   12.49
   2  25   2   31.50   12.59
   3  25   2  471.40   28.30
   3  25   2  477.45   23.48
   4  25   2  181.48   19.79
   4  25   2  191.72   15.79
   5  25   2   20.60   14.96
   6  25   2  136.95   23.37
   7  25   2   91.31   21.36
   8  25   2  345.11   31.23
   9  25   2   73.78   23.75
  10  25   2  273.07   29.91
  11  25   2   95.74   25.41
  12  25   2    9.85   21.36
  13  25   2   70.68   27.00
  14  25   2   28.00   25.20
 -15  26   2   32.30   25.28
 -14  26   2   40.74   21.81
 -13  26   2   58.76   22.27
 -12  26   2   16.05   19.21
 -11  26   2   60.29   21.41
 -10  26   2   -1.85   15.71
  -9  26   2   78.22   21.17
  -8  26   2   64.14   19.64
  -7  26   2  223.71   22.22
  -6  26   2  108.08   20.09
  -5  26   2  164.65   18.14
  -4  26   2    9.05   11.98
  -4  26   2    9.48   12.63
  -3  26   2  254.57   19.72
  -3  26   2  272.00   22.09
  -2  26   2   36.01   12.99
  -2  26   2   80.45   15.05
  -1  26   2  148.18   15.67
  -1  26   2  155.95   16.71
   0  26   2  333.40   22.24
   0  26   2  323.51   20.43
   1  26   2   38.75   11.55
   1  26   2   43.64   13.50
   2  26   2    2.45    9.49
   2  26   2    7.53   11.03
   3  26   2  161.69   15.35
   3  26   2  171.48   19.02
   4  26   2   46.09   16.55
   5  26   2  229.79   28.37
   6  26   2   30.15   16.31
   7  26   2  247.00   25.74
   8  26   2  135.35   26.22
   9  26   2  263.55   29.05
  10  26   2    4.02   19.96
  11  26   2  155.03   31.75
  12  26   2   -4.91   18.60
  13  26   2   21.99   24.12
  14  26   2    4.54   23.31
 -15  27   2  153.15   31.93
 -14  27   2    7.05   17.77
 -13  27   2   92.44   24.14
 -12  27   2  -16.44   16.95
 -11  27   2  -13.76   16.51
 -10  27   2    9.97   16.71
  -9  27   2    8.22   17.04
  -8  27   2  -10.66   14.25
  -7  27   2   -1.70   13.30
  -6  27   2   13.99   15.40
  -5  27   2   54.11   19.29
  -5  27   2   66.40   17.82
  -4  27   2   36.86   14.14
  -4  27   2   29.35   14.25
  -3  27   2  120.91   18.10
  -3  27   2  101.81   18.72
  -2  27   2   36.38   13.75
  -2  27   2   48.28   13.80
  -1  27   2  194.59   21.77
  -1  27   2  156.92   16.69
   0  27   2   55.50   13.32
   0  27   2   59.10   14.26
   1  27   2  705.99   34.25
   1  27   2  732.35   30.02
   2  27   2   23.80   13.62
   2  27   2    6.82    9.71
   3  27   2   87.89   14.90
   3  27   2   81.16   17.81
   4  27   2   10.80   13.85
   5  27   2  562.39   34.59
   6  27   2   55.59   19.89
   7  27   2   18.44   17.85
   8  27   2   82.13   22.73
   9  27   2   30.65   22.00
  10  27   2   38.14   20.80
  11  27   2   16.57   21.50
  12  27   2   58.63   26.56
  13  27   2  121.27   30.24
  14  27   2   42.82   28.77
 -14  28   2   29.23   22.31
 -13  28   2   12.85   18.45
 -12  28   2   -2.52   18.30
 -11  28   2  166.97   28.74
 -10  28   2   28.23   19.18
  -9  28   2  251.82   25.00
  -8  28   2   -7.58   15.69
  -7  28   2   38.63   18.27
  -6  28   2  -14.64   12.43
  -5  28   2  214.20   21.15
  -5  28   2  212.20   27.65
  -4  28   2   36.71   14.65
  -4  28   2   22.28   15.43
  -3  28   2   -5.60   10.00
  -3  28   2   22.95   13.59
  -2  28   2  248.56   20.11
  -2  28   2  206.48   19.56
  -1  28   2    6.60   11.07
  -1  28   2   12.73   11.12
   0  28   2  109.70   17.56
   0  28   2  144.14   19.98
   1  28   2   21.60   13.11
   1  28   2   34.51   11.84
   2  28   2  269.62   22.83
   2  28   2  291.35   20.15
   3  28   2   53.20   16.87
   4  28   2  300.33   25.78
   5  28   2   94.51   21.28
   6  28   2   52.02   19.07
   7  28   2   72.47   22.73
   8  28   2   22.56   18.33
   9  28   2   67.22   24.79
  10  28   2  119.17   28.87
  11  28   2   13.96   20.15
  12  28   2   43.26   25.00
  13  28   2   48.92   28.04
 -14  29   2  -13.39   22.06
 -13  29   2   41.64   21.51
 -12  29   2   65.01   23.55
 -11  29   2   16.80   18.16
 -10  29   2  240.04   30.95
  -9  29   2   88.48   22.54
  -8  29   2  115.23   22.71
  -7  29   2  139.56   23.20
  -6  29   2  302.67   24.94
  -6  29   2  298.81   28.21
  -5  29   2   98.64   20.07
  -5  29   2  107.40   22.68
  -4  29   2  351.56   27.72
  -4  29   2  297.41   23.89
  -3  29   2   47.41   16.16
  -3  29   2   69.13   16.86
  -2  29   2   15.34   12.66
  -2  29   2   28.08   13.15
  -1  29   2   66.52   15.72
  -1  29   2   62.03   16.25
   0  29   2   26.07   12.00
   1  29   2   18.80   13.82
   1  29   2    8.87   10.86
   2  29   2   22.01   14.56
   2  29   2   11.55   11.25
   3  29   2  -15.64   11.15
   4  29   2  298.18   26.15
   5  29   2   35.29   16.61
   6  29   2  263.62   31.49
   7  29   2    7.63   17.32
   8  29   2  292.00   30.08
   9  29   2   25.33   19.59
  10  29   2  176.69   31.97
  11  29   2  -18.75   18.30
  12  29   2   78.16   28.34
  13  29   2  -13.99   22.78
 -13  30   2   -6.03   20.51
 -12  30   2   94.09   24.70
 -11  30   2   -3.19   17.76
 -10  30   2    5.02   17.70
  -9  30   2    6.91   17.16
  -8  30   2   95.96   22.63
  -7  30   2  -22.61   13.25
  -6  30   2   91.08   20.73
  -6  30   2   82.50   22.74
  -5  30   2   15.63   14.74
  -5  30   2   13.23   15.77
  -4  30   2  265.58   30.82
  -4  30   2  258.38   22.43
  -3  30   2   72.67   17.71
  -3  30   2  100.56   20.20
  -2  30   2  108.69   19.75
  -2  30   2  131.65   20.62
  -1  30   2    2.91   11.80
  -1  30   2   -5.18   10.09
   0  30   2  920.74   40.39
   0  30   2  882.10   36.70
   1  30   2   27.43   15.96
   1  30   2    2.29   11.26
   2  30   2  178.51   24.87
   3  30   2    9.11   13.50
   4  30   2   90.40   21.69
   5  30   2  173.00   26.56
   6  30   2   50.70   20.66
   7  30   2  -35.08   12.00
   8  30   2   57.31   22.80
   9  30   2   81.24   26.89
  10  30   2   -6.84   19.62
  11  30   2    5.50   19.80
  12  30   2   37.81   25.00
  13  30   2  -15.97   23.25
 -12  31   2   32.55   21.48
 -11  31   2    7.70   17.95
 -10  31   2   65.30   21.67
  -9  31   2   66.69   21.18
  -8  31   2  232.72   24.98
  -7  31   2    7.22   16.76
  -7  31   2   -8.54   16.48
  -6  31   2  168.62   26.08
  -6  31   2  142.10   26.44
  -5  31   2   69.62   18.54
  -5  31   2   34.97   17.70
  -4  31   2  144.50   22.28
  -4  31   2  144.94   24.82
  -3  31   2   -5.83   12.74
  -3  31   2  -12.31   11.50
  -2  31   2    9.10   12.69
  -2  31   2   -3.81   12.71
  -1  31   2  248.41   22.97
  -1  31   2  243.94   21.96
   0  31   2  134.60   20.24
   0  31   2  144.25   22.32
   1  31   2  314.07   25.84
   1  31   2  328.28   22.04
   2  31   2   -3.64   13.37
   3  31   2   69.46   18.33
   4  31   2  144.25   23.81
   5  31   2  265.33   26.69
   6  31   2   27.44   19.44
   7  31   2   -6.64   16.64
   8  31   2   -2.52   16.90
   9  31   2   -4.82   17.94
  10  31   2   44.11   25.28
  11  31   2    7.72   22.57
  12  31   2   -4.48   22.93
 -12  32   2   56.22   23.43
 -11  32   2   62.72   23.83
 -10  32   2   -3.02   16.64
  -9  32   2  261.07   31.98
  -8  32   2   65.60   21.40
  -7  32   2  277.74   35.77
  -7  32   2  242.26   24.84
  -6  32   2   54.15   20.78
  -6  32   2   27.31   17.59
  -5  32   2  342.54   26.77
  -5  32   2  394.89   32.28
  -4  32   2  286.76   25.23
  -4  32   2  264.83   25.57
  -3  32   2   -1.14   12.91
  -3  32   2   18.87   15.62
  -2  32   2  -17.30   11.79
  -2  32   2  -13.10   11.95
  -1  32   2   38.00   16.08
  -1  32   2   42.12   15.96
   0  32   2   31.14   15.40
   0  32   2   17.89   13.33
   1  32   2   37.00   18.04
   2  32   2   -3.77   14.80
   3  32   2  105.43   21.71
   4  32   2   47.10   19.96
   5  32   2  202.58   29.83
   6  32   2  -26.78   14.11
   7  32   2   66.62   23.51
   8  32   2   14.69   20.07
   9  32   2   69.66   25.77
  10  32   2   13.18   21.98
  11  32   2   32.13   24.42
  12  32   2  -28.23   20.16
 -11  33   2   24.95   21.07
 -10  33   2   46.88   22.14
  -9  33   2   68.86   21.51
  -8  33   2   11.89   20.23
  -8  33   2   18.11   19.53
  -7  33   2   97.36   25.76
  -7  33   2  119.36   24.34
  -6  33   2   70.17   21.74
  -6  33   2   58.95   21.72
  -5  33   2  171.84   28.78
  -5  33   2  184.37   26.49
  -4  33   2  134.82   24.44
  -4  33   2  129.58   22.63
  -3  33   2  199.29   25.51
  -3  33   2  167.93   25.59
  -2  33   2   13.96   15.49
  -2  33   2    2.70   14.33
  -1  33   2  211.13   22.29
  -1  33   2  227.65   26.60
   0  33   2  109.22   21.60
   0  33   2   88.36   17.63
   1  33   2   67.80   19.66
   2  33   2   12.04   15.61
   3  33   2   46.84   18.55
   4  33   2   28.09   18.81
   5  33   2   -0.10   17.06
   6  33   2    3.50   16.62
   7  33   2  -16.77   17.50
   8  33   2    4.45   20.87
   9  33   2   -8.78   20.43
  10  33   2   22.51   23.09
  11  33   2    8.15   25.56
  12  33   2  -19.96   23.50
 -11  34   2  123.29   27.29
 -10  34   2   30.57   20.93
  -9  34   2  103.29   24.44
  -9  34   2   58.75   25.45
  -8  34   2   18.01   20.40
  -8  34   2   10.02   17.07
  -7  34   2   87.53   23.09
  -7  34   2   54.98   23.49
  -6  34   2   17.63   17.47
  -6  34   2   -5.27   16.42
  -5  34   2   40.65   19.14
  -5  34   2   29.33   19.14
  -4  34   2  124.81   24.48
  -4  34   2  158.33   24.70
  -3  34   2  -15.55   14.10
  -3  34   2   12.97   16.65
  -2  34   2   57.42   18.89
  -2  34   2   27.26   17.03
  -1  34   2   67.38   18.13
  -1  34   2   80.30   20.59
   0  34   2  298.35   27.18
   1  34   2   93.56   21.41
   2  34   2   24.06   17.54
   3  34   2    2.66   15.56
   4  34   2    4.64   16.10
   5  34   2   -7.94   16.81
   6  34   2   10.10   20.07
   7  34   2  257.64   35.92
   8  34   2   -3.45   19.87
   9  34   2  -17.21   19.49
  10  34   2  -30.82   19.51
  11  34   2   33.79   26.71
 -10  35   2   17.81   19.43
 -10  35   2   42.19   25.66
  -9  35   2   28.01   20.40
  -9  35   2   11.23   22.35
  -8  35   2  279.06   37.88
  -8  35   2  250.19   27.00
  -7  35   2   41.15   20.43
  -7  35   2   12.64   19.24
  -6  35   2  133.73   27.84
  -6  35   2  156.85   26.89
  -5  35   2    6.14   16.53
  -5  35   2  -14.11   13.84
  -4  35   2  131.86   23.62
  -4  35   2  121.60   24.85
  -3  35   2   44.26   18.96
  -3  35   2   63.48   21.36
  -2  35   2   52.83   19.87
  -2  35   2   93.34   22.42
  -1  35   2   13.00   14.93
  -1  35   2    8.93   17.25
   0  35   2   33.66   17.90
   1  35   2  -13.28   15.29
   2  35   2   10.37   18.13
   3  35   2   84.69   22.91
   4  35   2   56.78   22.07
   5  35   2   -1.30   17.95
   6  35   2  152.59   28.95
   7  35   2   -8.47   17.79
   8  35   2   48.08   22.85
   9  35   2  -23.66   21.44
  10  35   2   51.87   26.03
  11  35   2    0.75   26.14
 -11  36   2   11.72   25.25
 -10  36   2  -27.79   20.56
  -9  36   2    6.30   18.82
  -9  36   2   -4.23   21.34
  -8  36   2   59.49   24.70
  -8  36   2   37.67   20.88
  -7  36   2   20.02   20.43
  -7  36   2   48.83   20.13
  -6  36   2   11.92   17.03
  -6  36   2    5.22   17.25
  -5  36   2   46.14   20.79
  -5  36   2   63.97   22.04
  -4  36   2  233.61   25.26
  -3  36   2   37.97   19.26
  -3  36   2   57.72   20.74
  -2  36   2   35.87   18.99
  -2  36   2   43.22   19.41
  -1  36   2  -11.04   14.03
   0  36   2   78.58   21.78
   1  36   2  -23.44   12.59
   2  36   2  219.41   30.75
   3  36   2   40.10   20.62
   4  36   2   16.63   19.79
   5  36   2  -19.43   16.93
   6  36   2   47.77   21.60
   7  36   2    6.45   22.44
   8  36   2    4.99   21.60
   9  36   2  -23.45   18.87
  10  36   2    9.29   24.71
 -11  37   2    6.94   26.23
 -10  37   2    1.66   22.58
  -9  37   2  -13.01   17.91
  -9  37   2   13.15   22.30
  -8  37   2   42.69   22.69
  -8  37   2   25.10   19.87
  -7  37   2   -4.91   16.89
  -7  37   2   13.42   19.63
  -6  37   2   -9.76   16.32
  -6  37   2  -11.58   16.40
  -5  37   2  -12.66   17.57
  -5  37   2   11.55   17.70
  -4  37   2    0.87   17.08
  -4  37   2   19.90   18.21
  -3  37   2  120.45   23.84
  -3  37   2  102.89   23.31
  -2  37   2   67.16   21.67
  -2  37   2   48.10   18.98
  -1  37   2   84.74   22.85
   0  37   2  -13.68   16.20
   1  37   2   37.94   20.47
   2  37   2   11.20   16.94
   3  37   2   71.94   23.73
   4  37   2   30.57   20.85
   5  37   2   -0.28   19.01
   6  37   2   73.11   28.39
   7  37   2   22.12   24.31
   8  37   2   15.33   21.38
   9  37   2  -40.61   19.38
  10  37   2   10.40   25.68
 -10  38   2  -17.95   20.73
  -9  38   2   28.12   24.37
  -8  38   2   21.06   21.45
  -8  38   2    9.72   18.12
  -7  38   2   84.37   22.69
  -7  38   2   54.18   23.33
  -6  38   2  -19.32   16.23
  -6  38   2    4.77   17.91
  -5  38   2   23.76   20.59
  -5  38   2   21.54   18.95
  -4  38   2    3.08   17.40
  -4  38   2  -15.01   16.78
  -3  38   2    8.12   17.47
  -3  38   2   13.64   17.51
  -2  38   2   15.85   17.86
  -1  38   2  172.75   28.28
   0  38   2   -8.08   16.99
   1  38   2    6.96   18.42
   2  38   2   -6.83   18.56
   3  38   2   27.01   20.07
   4  38   2  -31.72   15.72
   5  38   2   12.13   22.05
   6  38   2    3.38   21.64
   7  38   2  268.07   40.48
   8  38   2   -4.88   20.37
   9  38   2   38.85   26.91
  -9  39   2   -6.47   21.00
  -8  39   2   28.09   24.13
  -7  39   2   37.51   23.30
  -7  39   2   62.34   22.95
  -6  39   2  -21.46   18.73
  -6  39   2  -17.61   16.63
  -5  39   2  -10.11   15.53
  -5  39   2  -18.06   16.06
  -4  39   2  -18.60   16.05
  -4  39   2   -9.94   16.85
  -3  39   2   74.63   22.17
  -2  39   2  115.45   25.20
  -1  39   2   73.50   22.61
   0  39   2    6.62   18.69
   1  39   2   47.82   21.91
   2  39   2   14.61   19.26
   3  39   2  188.25   33.25
   4  39   2   -1.28   20.50
   5  39   2    8.23   19.67
   6  39   2   37.44   23.65
   7  39   2   23.91   24.82
   8  39   2   -4.31   21.00
   9  39   2  -18.81   22.19
  -9  40   2   24.17   25.54
  -8  40   2  -16.74   18.78
  -7  40   2   -0.73   19.10
  -7  40   2   19.97   23.05
  -6  40   2  -23.86   16.52
  -6  40   2  -32.01   16.37
  -5  40   2    9.40   18.47
  -5  40   2    0.81   19.31
  -4  40   2    1.71   17.96
  -4  40   2    5.49   17.59
  -3  40   2   -1.82   16.36
  -2  40   2   44.19   21.50
  -1  40   2    5.32   19.09
   0  40   2   59.39   24.03
   1  40   2    9.24   18.39
   2  40   2  142.00   29.88
   3  40   2   31.99   22.07
   4  40   2    8.46   20.92
   5  40   2    1.88   22.06
   6  40   2   79.47   26.66
   7  40   2   28.65   23.43
   8  40   2   -0.04   21.20
  -8  41   2   78.64   26.59
  -7  41   2    2.77   21.46
  -6  41   2   34.56   21.76
  -6  41   2   28.28   22.35
  -5  41   2   27.41   20.35
  -5  41   2   -4.52   19.31
  -4  41   2   37.53   19.38
  -3  41   2  -23.08   15.79
  -2  41   2   -2.82   20.06
  -1  41   2   43.44   22.26
   0  41   2   -8.12   15.94
   1  41   2   -9.75   18.49
   2  41   2   15.69   20.56
   3  41   2   -9.64   17.42
   4  41   2   25.23   22.77
   5  41   2  -32.39   18.71
   6  41   2   99.14   29.52
   7  41   2   22.78   24.82
  -7  42   2   -7.96   18.92
  -6  42   2   28.49   21.59
  -5  42   2  -23.30   17.62
  -5  42   2   -6.05   18.20
  -4  42   2   86.09   23.67
  -3  42   2  -16.15   17.32
  -2  42   2   40.33   24.24
  -1  42   2   76.70   24.26
   0  42   2  116.95   26.32
   1  42   2  -17.12   17.96
   2  42   2    4.70   19.93
   3  42   2   -2.40   17.94
   4  42   2    7.95   21.49
   5  42   2  -10.68   18.92
   6  42   2   42.11   26.21
  -6  43   2   17.45   23.51
  -4  43   2   58.63   25.10
  -3  43   2    3.26   19.49
  -2  43   2    3.18   20.88
  -1  43   2   72.53   24.91
   0  43   2    3.76   17.54
   1  43   2    8.09   21.37
   2  43   2   10.77   20.56
   3  43   2  -11.54   19.47
   4  43   2   53.81   26.10
   5  43   2   16.24   21.87
  -3  44   2  -20.20   18.93
  -2  44   2  -21.92   18.27
  -1  44   2   45.84   24.35
   0  44   2   43.09   23.31
   1  44   2   24.30   22.15
   2  44   2  -26.59   18.50
   3  44   2   54.84   27.04
   4  44   2   -9.88   20.41
  -2  45   2    3.88   21.92
  -1  45   2  113.23   30.62
   0  45   2   25.85   23.88
   1  45   2   -3.25   21.87
   2  45   2  -21.77   21.88
   3  45  -3  -10.34   23.47
   2  45  -3  -14.12   22.58
   1  45  -3   72.20   29.50
   0  45  -3   17.24   22.51
  -1  45  -3  -16.36   20.35
   5  44  -3    5.60   23.64
   4  44  -3    1.52   24.84
   3  44  -3  -25.92   19.60
   2  44  -3   25.09   23.94
   1  44  -3    4.81   21.97
   0  44  -3   93.10   28.98
  -1  44  -3   -2.33   20.68
  -2  44  -3   20.92   23.67
  -3  44  -3    5.03   21.98
   6  43  -3    1.47   24.90
   5  43  -3    4.38   21.97
   4  43  -3  -29.16   21.98
   3  43  -3    1.59   22.41
   2  43  -3   -6.05   21.26
   1  43  -3   72.71   25.45
   0  43  -3   -1.33   21.59
  -1  43  -3   14.71   20.63
  -2  43  -3    0.83   19.63
  -3  43  -3  -11.21   20.64
  -4  43  -3    9.09   21.66
  -5  43  -3   16.70   22.97
   7  42  -3   -3.78   24.98
   6  42  -3    3.94   22.16
   5  42  -3   48.16   26.65
   4  42  -3  -29.16   19.77
   3  42  -3  -12.68   20.59
   2  42  -3   -7.93   19.80
   1  42  -3  -10.09   18.75
   0  42  -3   -8.87   20.63
  -1  42  -3   -8.24   17.87
  -2  42  -3   40.43   23.32
  -3  42  -3   20.00   21.01
  -4  42  -3    5.48   18.68
  -5  42  -3   42.38   23.60
  -6  42  -3   -8.48   21.70
   8  41  -3  -14.44   23.78
   7  41  -3  -18.24   21.34
   6  41  -3  -26.52   18.06
   5  41  -3   -6.17   18.72
   4  41  -3   26.03   23.98
   3  41  -3   34.46   20.97
   2  41  -3    0.32   19.28
   1  41  -3  116.20   29.19
   0  41  -3  -14.16   19.01
  -1  41  -3   53.50   23.76
  -2  41  -3  -20.64   17.68
  -3  41  -3   68.42   23.45
  -4  41  -3   38.77   20.87
  -5  41  -3   39.44   21.31
  -6  41  -3   24.31   20.88
  -7  41  -3   24.73   23.84
   9  40  -3   -9.86   26.11
   8  40  -3   -8.25   23.40
   7  40  -3    9.33   23.87
   6  40  -3    9.97   22.15
   5  40  -3   -0.34   20.95
   4  40  -3  -28.99   17.88
   3  40  -3  -13.58   18.75
   2  40  -3   24.82   22.02
   1  40  -3   27.28   22.50
   0  40  -3   -2.40   19.92
  -1  40  -3  -14.53   18.57
  -2  40  -3    6.54   19.57
  -3  40  -3    1.16   19.80
  -4  40  -3  -20.75   17.36
  -5  40  -3   -7.18   20.09
  -6  40  -3   59.29   23.19
  -7  40  -3  182.59   32.49
  -8  40  -3  -31.70   18.85
   9  39  -3  -37.58   21.89
   8  39  -3   61.22   28.73
   7  39  -3    0.43   22.71
   6  39  -3  -10.01   19.19
   5  39  -3  -31.78   16.27
   4  39  -3  -10.10   19.58
   3  39  -3   -8.37   16.81
   2  39  -3   36.76   21.22
   1  39  -3   10.16   18.63
   0  39  -3  -11.00   16.40
  -1  39  -3   -4.19   15.77
  -2  39  -3   52.77   22.85
  -3  39  -3   61.34   21.63
  -4  39  -3  -31.18   16.74
  -5  39  -3    3.25   19.85
  -6  39  -3  112.08   27.21
  -7  39  -3   12.13   19.01
  -8  39  -3   37.17   25.67
  10  38  -3  -43.11   23.45
   9  38  -3    6.21   23.18
   8  38  -3   61.79   26.15
   7  38  -3  -10.91   19.39
   6  38  -3  -22.98   16.73
   5  38  -3  -14.78   17.74
   4  38  -3  102.95   27.38
   3  38  -3  -17.91   16.97
   2  38  -3   21.97   18.94
   1  38  -3  -13.67   15.96
   0  38  -3   -2.25   18.83
  -1  38  -3   -2.25   16.68
  -2  38  -3  189.63   29.85
  -3  38  -3   16.76   19.49
  -4  38  -3   35.66   20.96
  -5  38  -3  -23.19   15.93
  -6  38  -3   75.39   23.97
  -7  38  -3  -15.84   20.24
  -8  38  -3  -17.04   18.27
  -9  38  -3   24.88   23.04
  11  37  -3  -18.11   22.58
  10  37  -3  -19.38   20.40
   9  37  -3   -5.80   22.15
   8  37  -3   88.14   27.04
   7  37  -3   -6.45   18.48
   6  37  -3   36.32   22.61
   5  37  -3   -5.03   19.39
   4  37  -3   -0.76   16.79
   3  37  -3    2.62   17.73
   2  37  -3  107.27   25.90
   1  37  -3    4.29   17.70
   0  37  -3  -12.15   15.65
  -1  37  -3    6.12   16.63
  -2  37  -3   36.32   19.62
  -3  37  -3  216.54   30.72
  -4  37  -3   -2.88   18.58
  -5  37  -3   20.04   18.59
  -6  37  -3  156.09   29.04
  -7  37  -3   53.75   22.46
  -8  37  -3   27.86   24.60
  -9  37  -3  -46.80   18.77
  11  36  -3   57.68   31.87
  10  36  -3   -7.56   21.78
   9  36  -3   90.78   29.15
   8  36  -3   -5.64   18.26
   7  36  -3    6.81   21.88
   6  36  -3  -11.21   18.20
   5  36  -3  124.70   28.25
   4  36  -3    8.80   18.77
   3  36  -3   24.46   19.89
   2  36  -3   60.73   21.55
   1  36  -3  140.73   27.12
   0  36  -3  107.39   25.00
  -1  36  -3   -0.33   16.12
  -2  36  -3   16.31   16.91
  -3  36  -3   52.77   20.78
  -4  36  -3    2.72   16.79
  -5  36  -3  -14.07   17.46
  -6  36  -3   19.31   20.38
  -7  36  -3  311.22   31.35
  -8  36  -3   22.04   20.89
  -9  36  -3   54.33   23.83
 -10  36  -3    0.80   20.45
  11  35  -3   19.48   25.50
  10  35  -3  -23.14   21.37
   9  35  -3   -5.81   20.92
   8  35  -3    0.37   19.85
   7  35  -3   22.84   22.01
   6  35  -3   -9.78   18.11
   5  35  -3   53.37   22.08
   4  35  -3   31.95   20.91
   3  35  -3  181.53   30.81
   2  35  -3   61.23   22.82
   1  35  -3  342.59   29.92
   0  35  -3   27.48   18.77
  -1  35  -3   44.40   19.54
  -2  35  -3   97.96   23.32
  -3  35  -3  252.06   26.37
  -4  35  -3   18.96   19.54
  -5  35  -3  -19.56   14.71
  -6  35  -3   33.17   21.03
  -7  35  -3   32.03   21.01
  -8  35  -3   -8.97   19.65
  -9  35  -3  -17.05   20.28
 -10  35  -3   49.89   26.51
  12  34  -3   30.51   28.28
  11  34  -3   -1.42   24.72
  10  34  -3  -33.02   21.36
   9  34  -3   81.08   28.42
   8  34  -3   35.60   21.78
   7  34  -3  126.91   29.21
   6  34  -3    5.24   17.88
   5  34  -3  197.70   31.94
   4  34  -3  184.16   29.03
   3  34  -3   86.94   24.33
   2  34  -3   48.20   20.49
   1  34  -3   37.31   17.25
   0  34  -3   -3.26   15.38
  -1  34  -3   55.88   19.55
  -2  34  -3  234.11   29.05
  -3  34  -3  203.07   27.54
  -4  34  -3   10.07   16.95
  -5  34  -3   88.32   24.83
  -6  34  -3   29.56   21.23
  -7  34  -3   15.79   19.51
  -8  34  -3   -4.90   17.31
  -9  34  -3   34.33   21.02
 -10  34  -3   -7.41   18.58
 -11  34  -3  -20.28   21.00
  12  33  -3   45.50   29.15
  11  33  -3   -2.79   24.08
  10  33  -3   35.86   25.71
   9  33  -3   12.83   22.97
   8  33  -3  177.24   34.01
   7  33  -3  -18.24   17.84
   6  33  -3  211.72   30.55
   5  33  -3   77.09   24.39
   4  33  -3  151.97   27.65
   3  33  -3   -9.45   15.70
   2  33  -3  198.49   28.31
   1  33  -3  185.24   27.43
   0  33  -3  150.19   24.63
  -1  33  -3  162.83   25.23
  -2  33  -3   32.23   17.58
  -3  33  -3  122.30   23.34
  -4  33  -3  114.89   23.16
  -5  33  -3   10.35   18.26
  -6  33  -3  112.16   25.78
  -7  33  -3  -13.01   16.82
  -8  33  -3  104.06   26.82
  -9  33  -3   10.76   20.33
 -10  33  -3   72.59   26.89
 -11  33  -3  -27.75   19.53
  13  32  -3    0.53   26.21
  12  32  -3   55.46   28.05
  11  32  -3    4.28   21.88
  10  32  -3    6.49   21.71
   9  32  -3   -2.68   21.60
   8  32  -3   45.25   21.47
   7  32  -3  -31.24   15.32
   6  32  -3   71.57   21.80
   5  32  -3   59.67   21.65
   4  32  -3  230.79   26.19
   3  32  -3  -26.96   13.61
   2  32  -3  212.33   29.12
   1  32  -3   59.02   18.84
   0  32  -3  719.43   38.67
  -1  32  -3  -14.09   12.32
  -2  32  -3  138.56   23.88
  -3  32  -3   -1.00   14.75
  -4  32  -3   48.45   18.99
  -5  32  -3    8.90   15.27
  -6  32  -3  -17.70   16.28
  -7  32  -3   61.86   23.24
  -8  32  -3   86.98   24.24
  -9  32  -3  -17.70   17.86
 -10  32  -3   -4.31   18.49
 -11  32  -3  -17.27   17.86
 -12  32  -3   36.52   25.04
  13  31  -3   34.63   26.12
  12  31  -3   -2.22   21.80
  11  31  -3   -5.25   19.70
  10  31  -3  184.95   32.51
   9  31  -3   87.68   27.16
   8  31  -3   55.46   23.00
   7  31  -3    2.20   18.70
   6  31  -3  194.87   30.08
   5  31  -3  116.98   23.20
   4  31  -3   89.50   20.95
   3  31  -3  127.71   23.16
   2  31  -3   -0.02   14.09
   1  31  -3  201.74   22.29
   0  31  -3   57.04   17.32
  -1  31  -3   71.06   18.92
  -1  31  -3   64.93   16.92
  -2  31  -3   63.02   19.34
  -3  31  -3   82.07   20.36
  -4  31  -3  319.19   27.46
  -5  31  -3    0.61   16.70
  -6  31  -3   23.99   18.28
  -7  31  -3   46.75   20.38
  -8  31  -3   89.21   25.48
  -9  31  -3   20.29   19.22
 -10  31  -3   56.56   23.45
 -11  31  -3    2.30   22.37
 -12  31  -3    0.07   19.16
  14  30  -3   22.83   25.95
  13  30  -3    6.59   26.35
  12  30  -3  -32.54   20.06
  11  30  -3   88.76   29.54
  10  30  -3    7.40   20.21
   9  30  -3  238.88   34.95
   8  30  -3  -12.44   17.00
   7  30  -3  125.85   27.14
   6  30  -3   -8.78   13.99
   5  30  -3  409.56   32.39
   4  30  -3   19.44   16.91
   3  30  -3   39.28   17.98
   2  30  -3    6.25   15.50
   1  30  -3   34.34   15.28
   0  30  -3  159.03   19.43
  -1  30  -3   28.30   12.90
  -2  30  -3    0.66   13.82
  -3  30  -3  219.32   22.94
  -4  30  -3  160.52   25.32
  -5  30  -3  285.00   26.18
  -6  30  -3  -28.01   14.41
  -7  30  -3  160.67   27.75
  -8  30  -3    4.09   18.31
  -9  30  -3  115.99   27.34
 -10  30  -3   12.18   20.61
 -11  30  -3   20.14   20.86
 -12  30  -3   13.87   24.61
 -13  30  -3    3.80   25.63
  14  29  -3   27.48   27.33
  13  29  -3   83.21   30.59
  12  29  -3  -11.76   19.42
  11  29  -3   41.85   23.69
  10  29  -3   -5.07   18.82
   9  29  -3   38.05   21.26
   8  29  -3    3.05   18.65
   7  29  -3   -3.23   15.07
   6  29  -3    5.58   15.36
   5  29  -3  162.10   26.33
   4  29  -3   84.08   20.54
   3  29  -3  268.41   24.82
   2  29  -3   -8.02   12.78
   1  29  -3  239.37   23.03
   0  29  -3   38.65   15.11
   0  29  -3   35.34   12.73
  -1  29  -3  428.13   28.39
  -2  29  -3   68.33   18.06
  -3  29  -3   62.80   18.87
  -4  29  -3   96.26   21.19
  -5  29  -3  294.58   26.34
  -6  29  -3   -7.83   13.84
  -7  29  -3   15.43   17.39
  -8  29  -3  -17.95   14.85
  -9  29  -3   54.98   21.73
 -10  29  -3   -7.61   17.10
 -11  29  -3   18.64   20.18
 -12  29  -3   36.02   22.71
 -13  29  -3  107.16   30.56
  14  28  -3   45.69   25.84
  13  28  -3   39.45   25.98
  12  28  -3   42.42   25.25
  11  28  -3  120.42   30.55
  10  28  -3   31.83   17.17
   9  28  -3  116.81   27.08
   8  28  -3  -11.71   14.44
   7  28  -3  120.62   22.11
   6  28  -3   83.48   20.31
   5  28  -3   -7.69   13.63
   4  28  -3  205.73   22.73
   3  28  -3  109.65   20.48
   2  28  -3   81.26   18.93
   1  28  -3   19.03   13.60
   0  28  -3  281.83   19.65
   0  28  -3  272.98   23.07
  -1  28  -3   20.77   13.44
  -2  28  -3  102.73   19.51
  -3  28  -3  216.51   21.94
  -4  28  -3  152.72   23.89
  -5  28  -3  232.74   23.71
  -6  28  -3   32.56   17.94
  -7  28  -3   31.41   18.11
  -8  28  -3   21.29   19.43
  -9  28  -3  116.20   25.23
 -10  28  -3   -9.95   16.78
 -11  28  -3  103.33   27.65
 -12  28  -3   19.20   20.49
 -13  28  -3  -12.09   18.05
  15  27  -3   -0.53   26.32
  14  27  -3    5.76   24.18
  13  27  -3  -15.13   19.58
  12  27  -3   67.62   25.67
  11  27  -3   42.04   23.51
  10  27  -3  331.74   33.32
   9  27  -3   26.47   19.16
   8  27  -3  240.01   27.34
   7  27  -3   -3.89   14.76
   6  27  -3  239.60   25.32
   5  27  -3    1.43   13.50
   4  27  -3  161.96   23.85
   3  27  -3   70.37   17.78
   2  27  -3   26.93   13.83
   1  27  -3  124.69   19.54
   1  27  -3  122.44   15.99
   0  27  -3   22.26   12.91
   0  27  -3    9.02    9.27
  -1  27  -3  120.65   20.25
  -2  27  -3   63.86   17.48
  -3  27  -3  121.11   21.67
  -4  27  -3  184.30   24.58
  -5  27  -3  180.05   24.82
  -6  27  -3  210.74   27.62
  -7  27  -3   71.49   21.56
  -8  27  -3  277.44   27.53
  -9  27  -3   33.81   21.02
 -10  27  -3  296.72   36.42
 -11  27  -3   38.39   21.43
 -12  27  -3   81.07   27.16
 -13  27  -3   53.63   26.34
 -14  27  -3   -4.41   22.50
  15  26  -3   26.06   26.60
  14  26  -3  149.28   34.42
  13  26  -3  -14.12   19.90
  12  26  -3   39.62   23.79
  11  26  -3   39.32   23.59
  10  26  -3   28.58   18.66
   9  26  -3   64.40   23.24
   8  26  -3   -9.46   14.94
   7  26  -3    3.12   15.64
   6  26  -3  246.45   25.11
   5  26  -3  168.16   25.28
   4  26  -3   36.01   12.52
   3  26  -3   -0.72   10.66
   2  26  -3  155.49   21.61
   1  26  -3   -0.18   10.34
   1  26  -3   -6.83    7.59
   0  26  -3  189.40   19.19
  -1  26  -3   57.72   15.84
  -2  26  -3  758.01   35.79
  -3  26  -3   27.43   15.88
  -4  26  -3  158.44   23.19
  -5  26  -3   17.79   15.25
  -6  26  -3   77.82   19.21
  -7  26  -3   51.26   18.70
  -8  26  -3   11.97   14.88
  -9  26  -3   81.83   23.80
 -10  26  -3  -19.83   18.49
 -11  26  -3   10.12   18.31
 -12  26  -3  133.33   28.01
 -13  26  -3   48.94   23.32
 -14  26  -3   75.88   25.64
  15  25  -3   90.84   31.98
  14  25  -3   -3.49   21.85
  13  25  -3   74.79   25.18
  12  25  -3   41.50   21.95
  11  25  -3   34.30   21.23
  10  25  -3  103.04   26.60
   9  25  -3   10.80   16.37
   8  25  -3  214.91   26.67
   7  25  -3   56.40   18.62
   6  25  -3  294.19   26.42
   5  25  -3  206.23   26.37
   4  25  -3   60.84   15.72
   3  25  -3    5.68   10.65
   2  25  -3    9.64    7.24
   2  25  -3   19.80   12.41
   1  25  -3  243.31   20.70
   1  25  -3  239.58   16.41
   0  25  -3   -6.75   10.14
  -1  25  -3  359.58   24.35
  -2  25  -3  199.94   19.69
  -3  25  -3  183.91   19.80
  -4  25  -3   22.25   13.94
  -5  25  -3  402.06   27.95
  -6  25  -3  175.20   24.78
  -7  25  -3  116.41   21.91
  -8  25  -3   87.98   21.18
  -9  25  -3    4.74   15.88
 -10  25  -3   25.96   18.71
 -11  25  -3   60.79   22.52
 -12  25  -3   81.00   22.34
 -13  25  -3   62.02   23.66
 -14  25  -3  -20.38   22.69
  15  24  -3   -0.51   23.17
  14  24  -3   11.35   23.26
  13  24  -3  116.97   29.92
  12  24  -3   26.59   21.99
  11  24  -3  192.99   32.70
  10  24  -3    4.80   16.46
 -10 -24   3    4.00   12.58
   9  24  -3  280.11   29.09
   8  24  -3    6.84   15.56
   7  24  -3  421.03   31.41
   6  24  -3   83.56   19.04
   5  24  -3  180.76   23.56
   4  24  -3    2.74    9.92
   3  24  -3   66.32   16.08
   2  24  -3  281.58   21.82
   2  24  -3  254.45   15.28
   1  24  -3   68.36   15.87
   1  24  -3   80.95   12.65
   0  24  -3    9.09   11.79
  -1  24  -3  520.96   28.07
  -2  24  -3  198.42   19.70
  -3  24  -3   42.07   14.87
  -4  24  -3   25.04   14.42
  -5  24  -3  941.63   40.88
  -6  24  -3  192.48   25.52
  -7  24  -3  362.86   27.57
  -8  24  -3   85.60   21.30
  -9  24  -3  220.07   28.35
 -10  24  -3   13.41   16.97
 -11  24  -3  267.05   28.90
 -12  24  -3   12.26   20.23
 -13  24  -3   -7.05   20.98
 -14  24  -3   -0.44   22.06
  16  23  -3    4.75   25.69
  15  23  -3   60.85   27.43
  14  23  -3  -17.49   20.35
  13  23  -3   74.91   26.24
  12  23  -3   19.06   20.95
  11  23  -3  476.34   38.16
  10  23  -3   25.42   18.64
 -10 -23   3   21.40   14.32
   9  23  -3  105.70   23.97
  -9 -23   3  137.39   21.03
  -8 -23   3  176.81   22.31
   8  23  -3  103.15   22.68
   6  23  -3   30.43   14.03
   5  23  -3   98.53   18.84
   4  23  -3   20.46   11.86
   3  23  -3  774.31   35.63
   2  23  -3   10.03    7.31
   2  23  -3   18.40   11.17
   1  23  -3  297.55   21.32
   1  23  -3  301.12   16.80
   0  23  -3   62.84   15.04
  -1  23  -3  911.37   36.51
  -2  23  -3   52.91   14.31
  -3  23  -3  456.65   26.94
  -4  23  -3    2.58   12.51
  -5  23  -3  136.47   21.05
  -6  23  -3  154.97   23.45
  -7  23  -3   57.87   18.06
  -8  23  -3  177.17   25.98
  -9  23  -3    7.72   14.73
 -10  23  -3   40.80   19.03
 -11  23  -3   71.09   23.83
 -12  23  -3   24.84   21.72
 -13  23  -3   65.66   26.71
 -14  23  -3  -32.04   16.49
 -15  23  -3   53.40   27.68
  16  22  -3  163.37   36.37
  15  22  -3    1.98   22.32
  14  22  -3   56.73   27.63
  13  22  -3   23.48   21.43
  12  22  -3   67.95   23.63
  11  22  -3   85.17   23.84
  10  22  -3  118.02   26.35
 -10 -22   3  157.34   21.38
  -9 -22   3   53.76   16.14
   9  22  -3   32.25   18.78
  -8 -22   3  244.01   21.20
   8  22  -3  268.85   26.24
   7  22  -3  447.69   31.00
  -7 -22   3  445.14   26.40
  -6 -22   3   90.38   16.01
   6  22  -3   92.25   18.58
   5  22  -3  159.29   22.06
   4  22  -3   25.30   10.65
   3  22  -3  563.02   20.32
   3  22  -3  597.12   30.56
   2  22  -3  371.62   23.85
   2  22  -3  375.24   17.15
   1  22  -3  -11.63    8.94
   0  22  -3  362.02   22.97
  -1  22  -3  544.88   27.82
  -2  22  -3  830.56   34.86
  -3  22  -3  116.63   17.65
  -4  22  -3  203.45   19.43
  -5  22  -3  760.02   35.83
  -6  22  -3   20.51   15.06
  -7  22  -3   61.20   18.52
  -8  22  -3   11.59   15.02
  -9  22  -3   -7.16   13.35
 -10  22  -3  109.42   24.45
 -11  22  -3    7.00   18.35
 -12  22  -3  147.18   30.12
 -13  22  -3   -1.53   17.18
 -14  22  -3   14.47   26.76
 -15  22  -3    8.29   24.48
  16  21  -3   46.67   25.06
  15  21  -3   -1.48   23.62
  14  21  -3   17.03   21.20
  13  21  -3   -5.20   16.82
  12  21  -3   57.25   21.18
  11  21  -3    4.90   15.72
 -10 -21   3  766.64   34.49
  10  21  -3  697.56   42.91
  -9 -21   3   17.73   13.41
   9  21  -3  -13.82   14.15
  -8 -21   3  350.72   23.64
   8  21  -3  312.89   27.64
  -7 -21   3   76.53   14.96
   7  21  -3   89.26   18.37
   6  21  -3 1260.85   49.00
  -6 -21   3 1183.83   42.22
  -5 -21   3  -13.77    7.50
   5  21  -3   10.11   10.88
   4  21  -3  178.29   18.32
   3  21  -3  277.03   13.73
   3  21  -3  301.37   21.94
   2  21  -3  310.76   15.33
   2  21  -3  304.02   21.09
   1  21  -3    2.78    9.26
   0  21  -3  141.79   15.59
  -1  21  -3  170.07   17.08
  -2  21  -3 1116.52   40.11
  -3  21  -3   36.91   13.35
  -4  21  -3  259.66   19.77
  -5  21  -3  175.17   19.19
  -6  21  -3  766.07   36.61
  -7  21  -3   63.35   18.32
  -8  21  -3  285.52   25.36
  -9  21  -3   -9.80   13.71
 -10  21  -3   -5.01   16.64
 -11  21  -3   32.49   17.49
 -12  21  -3  153.11   26.91
 -13  21  -3  -26.01   18.12
 -14  21  -3  -29.23   20.67
 -15  21  -3   23.37   30.96
  16  20  -3   59.34   27.58
  15  20  -3    6.55   23.67
  14  20  -3  112.77   29.48
  13  20  -3   48.79   21.36
  12  20  -3  152.59   26.64
  11  20  -3   15.68   16.89
 -10 -20   3  389.87   24.93
  10  20  -3  341.84   31.41
   9  20  -3  114.02   23.25
  -9 -20   3  174.63   21.31
   8  20  -3   38.93   16.32
  -8 -20   3   30.21   13.70
  -7 -20   3  440.10   25.03
   7  20  -3  386.02   27.93
  -6 -20   3  108.62   16.23
   6  20  -3  111.57   19.34
   5  20  -3   -8.64    9.21
  -5 -20   3  -11.01    7.93
   4  20  -3  212.30   19.10
   3  20  -3   74.39   14.34
   2  20  -3 1995.24   56.40
   2  20  -3 1943.81   44.02
   1  20  -3  160.82   15.58
   0  20  -3 1406.69   44.22
  -1  20  -3  675.76   29.79
  -2  20  -3  976.20   36.51
  -3  20  -3   12.38   11.65
  -4  20  -3  159.40   16.87
  -5  20  -3  434.93   26.64
  -6  20  -3  297.24   23.58
  -7  20  -3   54.89   16.97
  -8  20  -3   -3.54   13.86
  -9  20  -3   33.53   16.78
 -10  20  -3   67.33   20.94
 -11  20  -3   80.28   21.85
 -12  20  -3  103.37   24.12
 -13  20  -3  -21.22   19.71
 -14  20  -3  -13.15   15.65
 -15  20  -3    6.49   20.98
  17  19  -3   44.77   29.57
  16  19  -3    4.86   23.22
  15  19  -3    2.49   20.48
  14  19  -3  -12.54   18.77
  13  19  -3  109.83   26.40
  12  19  -3   -9.65   15.03
  11  19  -3  482.50   36.26
  10  19  -3  241.19   31.48
 -10 -19   3  193.77   18.41
  -9 -19   3   14.59   12.91
   9  19  -3   15.89   15.27
  -8 -19   3  137.31   18.40
   8  19  -3  154.04   23.89
  -7 -19   3   36.91   12.64
   7  19  -3   26.48   13.82
   6  19  -3  289.88   23.27
  -6 -19   3  297.76   20.19
   5  19  -3   66.04   15.87
  -5 -19   3  122.70   16.12
  -4 -19   3  703.21   29.88
   4  19  -3  724.86   32.80
   4  19  -3  674.82   19.58
   3  19  -3 1365.98   45.38
   3  19  -3 1440.12   32.61
   2  19  -3    7.95    5.55
   1  19  -3  984.72   35.33
   0  19  -3   12.15    9.72
  -1  19  -3 1558.29   46.76
  -2  19  -3  445.28   23.79
  -3  19  -3  178.69   16.97
  -4  19  -3  441.21   24.47
  -5  19  -3   23.00   12.54
  -6  19  -3   43.21   14.57
  -7  19  -3  -15.12    9.92
  -8  19  -3  275.59   24.60
  -9  19  -3  117.00   21.92
 -10  19  -3   -6.15   14.22
 -11  19  -3   99.56   23.66
 -12  19  -3    9.91   19.55
 -13  19  -3   21.38   22.88
 -14  19  -3   -2.85   24.30
 -15  19  -3  120.13   36.23
  17  18  -3   -4.39   21.32
  16  18  -3  -14.25   21.61
  15  18  -3   -2.88   19.62
  14  18  -3   19.48   20.41
  13  18  -3  106.76   26.37
  12  18  -3   -5.35   15.37
  11  18  -3  126.63   25.26
 -10 -18   3   48.86   14.64
  10  18  -3   53.24   19.92
   9  18  -3  645.86   37.46
  -9 -18   3  582.95   28.51
   8  18  -3    2.40   11.02
  -8 -18   3    5.62   10.38
  -7 -18   3 1209.85   40.94
   7  18  -3 1263.08   48.80
   6  18  -3   78.06   16.07
  -6 -18   3   89.17   14.44
   5  18  -3  488.60   27.37
  -5 -18   3  463.35   23.84
   4  18  -3    9.16    7.90
   4  18  -3    1.78    4.74
  -4 -18   3    4.90    8.19
  -3 -18   3 1341.08   42.51
   3  18  -3 1369.93   31.08
   3  18  -3 1394.40   44.66
   2  18  -3   11.28    8.87
   2  18  -3    3.62    5.62
   0  18  -3   37.14   10.67
  -1  18  -3  617.46   27.07
  -2  18  -3  246.09   17.95
  -3  18  -3  639.94   28.59
  -4  18  -3    1.29    9.29
  -5  18  -3 1582.57   50.03
  -6  18  -3  234.01   20.37
  -7  18  -3  182.48   19.85
  -8  18  -3   -9.79   11.78
  -9  18  -3  260.91   24.14
 -10  18  -3   37.73   18.31
 -11  18  -3   93.44   23.49
 -12  18  -3   -2.25   18.97
 -13  18  -3   39.83   22.10
 -14  18  -3   -5.78   23.46
 -15  18  -3  104.83   34.21
 -16  18  -3   10.47   29.58
  17  17  -3   29.91   24.77
  16  17  -3    0.09   21.80
  15  17  -3  117.78   30.92
  14  17  -3   -6.51   18.82
  13  17  -3   89.12   24.02
  12  17  -3    8.93   15.61
  11  17  -3  265.93   32.02
  10  17  -3  289.81   27.57
 -10 -17   3  335.72   22.22
  -9 -17   3    2.76   11.05
   9  17  -3    2.52   12.70
  -8 -17   3  259.76   19.05
   8  17  -3  237.22   22.68
  -7 -17   3   25.01   10.71
   7  17  -3   21.26   12.36
  -6 -17   3 1189.75   38.85
   6  17  -3 1093.03   42.90
   5  17  -3  327.79   22.36
  -5 -17   3  339.93   20.07
   4  17  -3  172.49   16.44
   4  17  -3  152.84    8.08
  -4 -17   3  162.20   14.39
   3  17  -3  575.74   26.73
  -3 -17   3  522.82   24.61
   3  17  -3  517.34   16.28
   1  17  -3  782.89   29.71
   0  17  -3  212.92   15.77
  -1  17  -3 1344.49   40.84
  -2  17  -3  638.64   27.21
  -3  17  -3    2.18    8.97
  -4  17  -3   79.41   14.77
  -5  17  -3  140.88   15.99
  -6  17  -3  197.05   19.15
  -7  17  -3  -11.35   10.47
  -8  17  -3    6.73   12.31
  -9  17  -3   22.62   14.01
 -10  17  -3   16.58   16.81
 -11  17  -3  -13.80   15.29
 -12  17  -3   94.50   25.33
 -13  17  -3  228.97   32.53
 -14  17  -3    1.87   20.74
 -15  17  -3   62.34   26.61
 -16  17  -3   18.64   27.06
  17  16  -3   -2.59   21.94
  16  16  -3    1.13   21.48
  15  16  -3   41.14   24.31
  14  16  -3  188.89   32.30
  13  16  -3  -13.93   14.42
  12  16  -3   49.39   20.74
  11  16  -3  209.48   29.08
 -10 -16   3  135.42   15.74
  10  16  -3  143.88   23.98
  -9 -16   3  129.40   17.39
   9  16  -3  102.14   20.88
   8  16  -3  183.51   20.17
  -8 -16   3  181.65   15.68
   7  16  -3   -4.27    9.66
  -7 -16   3   15.84    9.93
   6  16  -3  534.51   28.80
  -6 -16   3  545.36   24.99
  -5 -16   3   59.64   12.33
   5  16  -3   53.83   12.75
   4  16  -3   76.17    5.89
  -4 -16   3  105.91   14.18
   4  16  -3   92.74   13.53
   3  16  -3  132.95    8.05
   3  16  -3  142.22   14.54
  -3 -16   3  110.72   12.45
   2  16  -3 4084.46   87.88
  -2 -16   3 4039.79   88.05
   1  16  -3  107.19   12.20
   0  16  -3 3151.11   71.17
  -1  16  -3    7.83    8.16
  -2  16  -3  496.43   23.39
  -3  16  -3  -10.76    7.21
  -4  16  -3  660.11   28.88
  -5  16  -3    8.55   10.15
  -6  16  -3  425.96   25.56
  -7  16  -3   54.80   15.47
  -8  16  -3   32.02   15.27
  -9  16  -3  851.03   40.55
 -10  16  -3    5.55   15.54
 -11  16  -3    4.37   15.45
 -12  16  -3  244.80   33.12
 -13  16  -3   24.58   22.21
 -14  16  -3   -7.59   17.99
 -15  16  -3    5.73   27.87
 -16  16  -3   84.40   40.13
  17  15  -3    7.62   22.51
  16  15  -3   -3.70   20.30
  15  15  -3   37.71   22.60
  14  15  -3  102.47   25.00
  13  15  -3  -12.96   15.47
  12  15  -3   80.06   22.54
  11  15  -3  102.11   23.18
  10  15  -3 1101.38   49.12
 -10 -15   3 1141.79   39.72
   9  15  -3    1.72   11.14
  -9 -15   3   30.86   12.10
  -8 -15   3  358.86   20.97
   8  15  -3  349.62   25.47
   7  15  -3    8.33   10.36
  -7 -15   3   25.39   10.14
  -6 -15   3  632.57   26.87
   6  15  -3  651.05   31.08
   5  15  -3    4.54    8.02
  -5 -15   3    4.44    7.31
   4  15  -3  450.01   23.62
  -4 -15   3  466.30   22.02
   3  15  -3  491.84   23.54
  -3 -15   3  495.63   22.53
   3  15  -3  470.70   13.76
  -2 -15   3   25.07    9.24
   1  15  -3   80.88   12.12
   0  15  -3  583.06   24.19
  -1  15  -3  670.36   26.25
  -2  15  -3 1079.72   34.90
  -3  15  -3   -7.50    5.62
  -4  15  -3  292.71   18.99
  -5  15  -3  233.75   17.45
  -6  15  -3  277.01   19.68
  -7  15  -3   80.10   16.90
  -8  15  -3 1082.08   43.61
  -9  15  -3   50.26   17.89
 -10  15  -3  245.99   24.84
 -11  15  -3    1.73   15.56
 -12  15  -3  151.96   28.80
 -13  15  -3   22.23   23.13
 -14  15  -3   71.77   29.94
 -15  15  -3   55.43   31.90
 -16  15  -3   16.49   27.73
  17  14  -3   -1.38   21.08
  16  14  -3  167.25   32.94
  15  14  -3   13.66   19.79
  14  14  -3  337.71   33.06
  13  14  -3   70.32   22.40
  12  14  -3   56.59   20.52
  11  14  -3   28.16   17.13
 -10 -14   3   22.11   11.45
  10  14  -3   37.59   15.60
  -9 -14   3  490.22   24.80
   9  14  -3  526.21   31.78
  -8 -14   3   29.82   10.97
   8  14  -3   20.74   12.12
  -7 -14   3  286.30   17.93
   7  14  -3  265.78   21.30
  -6 -14   3  480.94   22.50
   6  14  -3  484.70   26.35
  -5 -14   3  332.11   18.39
   5  14  -3  317.00   19.73
   4  14  -3  545.70   25.36
  -4 -14   3  537.27   23.01
  -3 -14   3  171.37   13.67
   3  14  -3  190.05   14.69
   3  14  -3  187.96    7.85
  -2 -14   3  187.66   13.74
   2  14  -3  183.67   13.93
   1  14  -3  101.75   10.79
   0  14  -3 1288.20   37.34
  -1  14  -3  216.32   14.88
  -2  14  -3  645.65   25.12
  -3  14  -3  491.92   22.92
  -4  14  -3  847.55   31.66
  -5  14  -3  891.67   34.11
  -6  14  -3  340.81   22.49
  -7  14  -3  -15.31   10.16
  -8  14  -3   11.98   11.80
  -9  14  -3  202.09   25.62
 -10  14  -3    7.81   13.94
 -11  14  -3    6.97   15.25
 -12  14  -3  288.17   30.23
 -13  14  -3   31.02   23.60
 -14  14  -3  168.20   36.71
 -15  14  -3    0.18   25.47
 -16  14  -3  236.20   53.64
  18  13  -3   19.59   24.96
  17  13  -3   40.90   25.45
  16  13  -3   41.78   24.05
  15  13  -3  254.85   35.92
  14  13  -3   59.20   22.77
  13  13  -3  143.30   25.80
  12  13  -3  191.56   28.92
  11  13  -3  245.47   30.12
  10  13  -3   17.50   13.43
 -10 -13   3   35.10   12.63
  -9 -13   3  167.31   15.64
   9  13  -3  150.68   20.87
  -8 -13   3   76.30   13.24
   8  13  -3   57.95   14.92
   7  13  -3   15.48   10.39
  -7 -13   3   25.30    8.97
   6  13  -3   62.60   12.06
  -6 -13   3   58.75   11.33
   5  13  -3 1281.23   41.71
  -5 -13   3 1273.97   37.78
   4  13  -3  109.73   12.29
  -4 -13   3   92.83   10.46
  -3 -13   3  251.64   15.41
   3  13  -3  256.16   16.05
   3  13  -3  265.85    8.62
   2  13  -3   56.84    9.93
  -2 -13   3   62.56   10.15
   1  13  -3  212.75   13.71
  -1 -13   3  217.29   14.03
   0  13  -3  141.21   11.01
  -1  13  -3 1906.86   47.47
  -2  13  -3   90.33   12.40
  -3  13  -3   88.10   12.76
  -4  13  -3  165.20   14.88
  -5  13  -3  373.79   21.78
  -6  13  -3  320.72   21.31
  -7  13  -3   59.61   14.71
  -8  13  -3  321.57   24.07
  -9  13  -3   68.59   15.16
 -10  13  -3  353.24   28.19
 -11  13  -3   35.57   18.45
 -12  13  -3   55.39   21.89
 -13  13  -3  441.36   38.50
 -14  13  -3   66.77   29.35
 -15  13  -3   64.71   33.76
 -16  13  -3   -3.42   32.53
  18  12  -3   30.34   24.03
  17  12  -3   -0.97   19.58
  16  12  -3    0.48   19.32
  15  12  -3   59.85   21.79
  14  12  -3  128.99   27.04
  13  12  -3  170.82   28.02
  12  12  -3    4.39   14.75
  11  12  -3  393.59   30.47
  10  12  -3   74.41   18.32
 -10 -12   3   86.39   15.19
   9  12  -3  712.91   35.93
  -9 -12   3  745.05   29.78
   8  12  -3  101.69   17.78
  -8 -12   3  122.64   15.28
  -7 -12   3  613.89   25.46
   7  12  -3  603.38   29.80
   6  12  -3  176.05   16.02
  -6 -12   3  180.38   14.33
   5  12  -3  380.10   21.14
  -5 -12   3  370.54   18.68
   4  12  -3  581.52   24.95
  -4 -12   3  609.07   23.67
   3  12  -3  523.45   22.18
  -3 -12   3  497.97   20.86
   2  12  -3   22.54    6.93
  -2 -12   3   20.54    6.71
   1  12  -3   91.91    9.30
  -1 -12   3   85.60    9.26
   0  12  -3  683.81   24.10
  -1  12  -3  183.29   12.83
  -2  12  -3  224.58   13.83
  -3  12  -3  418.03   19.93
  -4  12  -3  305.14   18.47
  -5  12  -3 1112.01   37.63
  -6  12  -3  140.26   15.15
  -7  12  -3  478.21   26.95
  -8  12  -3   22.57   12.58
  -9  12  -3 1411.98   51.78
 -10  12  -3   17.26   16.81
 -11  12  -3  251.87   31.48
 -12  12  -3  175.72   29.87
 -13  12  -3   55.21   23.77
 -14  12  -3   22.55   22.64
 -15  12  -3   24.84   33.65
 -16  12  -3  -11.43   30.92
  18  11  -3   51.72   26.51
  17  11  -3  122.37   30.60
  16  11  -3   -7.22   18.55
  15  11  -3   71.86   24.00
  14  11  -3   17.10   16.75
  13  11  -3  185.22   28.37
  12  11  -3   41.66   18.78
 -11 -11   3    8.81   10.55
  11  11  -3  -14.64   13.20
 -10 -11   3 1078.97   37.26
  10  11  -3 1024.42   44.87
   9  11  -3    0.16    9.88
  -9 -11   3   11.57    9.35
  -8 -11   3   81.34   12.37
   8  11  -3   74.61   15.16
  -7 -11   3  106.13   13.94
   7  11  -3  102.95   16.26
  -6 -11   3   22.56    8.29
   6  11  -3   14.54    8.86
  -5 -11   3  766.18   26.91
   5  11  -3  749.97   29.54
   4  11  -3  359.42   18.98
  -4 -11   3  356.58   17.43
   3  11  -3  842.76   28.41
  -3 -11   3  859.29   27.58
   2  11  -3   39.79    7.72
  -2 -11   3   28.78    7.17
  -1 -11   3   63.45    9.23
   1  11  -3   35.88    7.48
   0  11  -3  384.51   16.64
  -1  11  -3  250.20   13.96
  -2  11  -3   64.42    9.75
  -3  11  -3 2538.20   58.85
  -4  11  -3 1479.04   42.17
  -5  11  -3    9.84    7.37
  -6  11  -3   -6.96    8.33
  -7  11  -3   66.89   15.31
  -8  11  -3  641.38   32.37
  -9  11  -3   30.04   15.03
 -10  11  -3   54.22   19.62
 -11  11  -3   11.16   13.72
 -12  11  -3   70.11   22.73
 -13  11  -3   67.22   23.47
 -14  11  -3   -0.37   26.10
 -15  11  -3  286.03   50.34
 -16  11  -3  109.26   49.07
 -17  11  -3  156.11   66.36
  18  10  -3   55.87   26.46
  17  10  -3   -5.75   19.50
  16  10  -3   75.78   24.07
  15  10  -3   -3.09   17.28
  14  10  -3  253.35   33.89
  13  10  -3   42.78   18.33
  12  10  -3  118.53   23.50
  11  10  -3    7.20   13.87
 -11 -10   3   36.91   12.57
 -10 -10   3   20.82   10.86
  10  10  -3   31.02   13.25
   9  10  -3   -4.25    9.09
  -9 -10   3    2.40    7.67
   8  10  -3    4.77    8.89
  -8 -10   3    6.16    7.62
  -7 -10   3  142.44   13.07
   7  10  -3  154.75   15.94
  -6 -10   3  409.12   19.47
   6  10  -3  373.48   21.60
   5  10  -3 1186.27   37.72
  -5 -10   3 1213.02   35.01
  -4 -10   3  208.97   13.12
   4  10  -3  206.09   14.08
   3  10  -3   75.90    9.97
  -3 -10   3   57.11    8.98
  -2 -10   3 1198.21   33.12
   2  10  -3 1229.71   33.07
  -1 -10   3   87.57    8.76
   1  10  -3   91.97    8.42
   0  10  -3    6.21    5.04
   0 -10   3    0.20    4.57
  -1  10  -3   51.46    8.55
  -2  10  -3 1505.93   38.71
  -3  10  -3   65.73    9.29
  -4  10  -3 1267.67   37.85
  -5  10  -3    6.69    8.29
  -6  10  -3  212.59   17.75
  -7  10  -3  759.86   32.91
  -8  10  -3    5.53   11.19
  -9  10  -3   18.34   12.89
 -10  10  -3   36.56   18.56
 -11  10  -3  149.85   27.07
 -12  10  -3  203.53   32.10
 -13  10  -3   79.33   27.04
 -14  10  -3   93.76   34.39
 -15  10  -3    6.83   30.73
 -16  10  -3  345.66   58.49
 -17  10  -3  112.95   59.86
  18   9  -3    2.19   21.98
  17   9  -3   12.65   19.33
  16   9  -3   -1.05   16.56
  15   9  -3   -3.56   17.34
  14   9  -3   61.84   20.99
  13   9  -3  135.25   24.47
  12   9  -3  294.36   27.58
 -11  -9   3   -3.98    9.53
  11   9  -3   -2.89   12.98
  10   9  -3  109.98   19.42
 -10  -9   3   89.04   14.43
   9   9  -3   -4.70    9.13
  -9  -9   3   10.57    8.08
   8   9  -3  265.97   20.55
  -8  -9   3  262.53   16.23
   7   9  -3    4.78    8.89
  -7  -9   3    8.55    6.83
  -6  -9   3 1335.05   37.87
   6   9  -3 1366.48   42.34
   5   9  -3    7.33    6.83
  -5  -9   3   14.69    6.64
  -4  -9   3 1202.10   33.60
   4   9  -3 1195.59   35.05
  -3  -9   3  162.13   11.17
   3   9  -3  183.26   11.89
  -2  -9   3   26.99    6.54
   1   9  -3   12.68    5.02
  -1  -9   3   13.47    5.45
   0   9  -3   17.27    5.72
   0  -9   3   14.51    5.67
  -1   9  -3  236.40   12.70
  -2   9  -3   24.74    6.90
  -3   9  -3   65.72    9.57
  -4   9  -3  204.49   14.65
  -5   9  -3  658.30   27.02
  -6   9  -3 2045.82   55.81
  -7   9  -3   33.81   11.75
  -8   9  -3  702.86   33.73
  -9   9  -3  -18.57   11.26
 -10   9  -3  262.86   25.15
 -11   9  -3  -12.94   15.57
 -12   9  -3  232.55   33.67
 -13   9  -3   37.20   25.98
 -14   9  -3   22.66   27.94
 -15   9  -3  -19.98   34.55
 -16   9  -3   67.54   51.24
 -17   9  -3  -31.27   61.20
  18   8  -3   45.07   23.72
  17   8  -3    4.12   19.20
  16   8  -3   50.58   22.98
  15   8  -3  -27.85   14.21
  14   8  -3  -11.99   14.30
  13   8  -3  101.37   23.02
  12   8  -3  265.11   25.91
 -11  -8   3  159.41   16.65
  11   8  -3  113.69   21.83
  10   8  -3  103.60   18.83
 -10  -8   3   95.71   14.38
   9   8  -3    9.18   10.70
  -9  -8   3   16.16    8.32
  -8  -8   3   87.75   12.31
   8   8  -3   59.69   13.56
   7   8  -3  188.87   16.38
  -7  -8   3  184.18   13.95
  -6  -8   3   13.17    6.44
   6   8  -3    3.74    7.24
   5   8  -3    7.51    6.51
  -5  -8   3   -1.90    4.93
  -4  -8   3  669.35   23.00
   4   8  -3  677.38   24.28
   3   8  -3  414.77   17.27
  -3  -8   3  411.50   16.94
  -2  -8   3 3276.74   67.65
   2   8  -3 3388.17   66.74
   1   8  -3  236.95   11.73
  -1  -8   3  225.98   11.90
   0   8  -3  592.05   19.34
   0  -8   3  573.89   19.37
  -1   8  -3   84.78    7.91
  -2   8  -3  761.72   24.09
  -3   8  -3  100.97    9.83
  -4   8  -3   -1.94    5.71
  -5   8  -3 1561.40   44.49
  -6   8  -3   89.58   14.65
  -7   8  -3  126.61   18.40
  -8   8  -3  225.43   20.60
  -9   8  -3  132.25   21.41
 -10   8  -3  196.02   27.30
 -11   8  -3  121.07   26.73
 -12   8  -3   -1.89   18.37
 -13   8  -3   11.74   25.25
 -14   8  -3   38.28   26.64
 -15   8  -3   -9.86   33.43
 -16   8  -3  274.87   66.68
 -17   8  -3   44.65   68.86
  18   7  -3  -27.58   17.36
  17   7  -3   88.09   26.95
  16   7  -3   -8.59   15.74
  15   7  -3   53.29   21.30
  14   7  -3  -12.26   13.77
  13   7  -3  141.58   24.50
  12   7  -3  276.93   25.83
 -11  -7   3  480.82   25.26
  11   7  -3  500.44   32.20
 -10  -7   3  451.45   23.14
  10   7  -3  428.79   27.90
   9   7  -3   -9.34    7.99
  -9  -7   3   -4.06    6.15
  -8  -7   3  534.84   23.42
   8   7  -3  599.92   28.78
  -7  -7   3   13.61    7.71
   7   7  -3    5.65    8.69
   6   7  -3  621.06   26.13
  -6  -7   3  640.37   23.75
  -5  -7   3    1.84    5.04
   5   7  -3    5.85    6.07
   4   7  -3  724.34   24.53
  -4  -7   3  680.45   22.89
   3   7  -3 1336.86   34.20
  -3  -7   3 1336.47   34.13
   2   7  -3    9.90    4.46
  -2  -7   3    3.37    4.22
   1   7  -3  856.87   23.21
  -1  -7   3  821.93   23.83
   0   7  -3 1109.50   28.35
   0  -7   3 1114.48   28.81
   0  -7   3 1184.57   26.53
  -1   7  -3 1611.38   37.01
   1  -7   3 1599.50   36.20
  -2   7  -3   -0.07    4.40
   2  -7   3   -0.39    5.22
   3  -7   3 1878.00   46.15
  -3   7  -3 1950.46   45.79
  -4   7  -3   -2.77    3.94
   4  -7   3   -6.63    6.26
  -5   7  -3   41.38   10.55
  -6   7  -3  420.23   22.80
  -7   7  -3  240.46   19.72
  -8   7  -3   -3.32   10.49
  -9   7  -3  -18.14   11.28
 -10   7  -3  176.24   26.38
 -11   7  -3   35.15   22.25
 -12   7  -3  -13.23   18.69
 -13   7  -3  -14.22   23.29
 -14   7  -3   57.35   35.29
 -15   7  -3  271.45   56.58
 -16   7  -3   68.37   53.75
 -17   7  -3  262.77   95.38
  18   6  -3  -17.46   19.03
  17   6  -3    5.52   18.69
  16   6  -3  -13.91   15.55
  15   6  -3    7.28   17.44
  14   6  -3   -2.03   13.37
  13   6  -3   13.86   13.71
  12   6  -3   71.27   19.61
 -11  -6   3  181.29   18.40
  11   6  -3  199.35   21.94
  10   6  -3  168.15   18.65
 -10  -6   3  181.93   15.73
  -9  -6   3  139.33   13.58
   9   6  -3  142.45   19.16
  -8  -6   3   -2.11    7.52
   8   6  -3   -2.93    7.77
  -7  -6   3 1111.38   34.21
   7   6  -3 1126.00   38.16
  -6  -6   3   31.23    7.64
   6   6  -3   27.04    8.54
  -5  -6   3  738.80   24.62
   5   6  -3  754.66   26.56
  -4  -6   3   17.08    5.56
   4   6  -3    4.64    4.82
  -3  -6   3   19.56    5.35
   3   6  -3   16.42    5.33
   2   6  -3  393.51   14.46
  -2  -6   3  367.65   14.78
   1   6  -3   42.73    6.32
  -1  -6   3   37.97    6.47
  -1  -6   3   41.66    4.73
   0  -6   3   43.07    6.76
   0   6  -3   45.20    5.93
   0  -6   3   50.27    6.47
  -1   6  -3  140.73    8.94
   1  -6   3  141.63    8.51
   1  -6   3  141.94    9.08
  -2   6  -3   -0.34    3.89
   2  -6   3    1.26    3.76
  -3   6  -3  305.29   15.16
   3  -6   3  276.17   15.22
   4  -6   3   18.91    8.35
  -4   6  -3   29.01    7.07
   5  -6   3   -4.00    7.12
  -5   6  -3    9.04    8.02
  -6   6  -3  718.43   29.58
   8  -6   3    2.18    9.79
   9  -6   3  133.41   20.25
  10  -6   3   19.55   14.17
  11  -6   3  469.19   32.11
 -14   6  -3   -7.86   32.55
 -15   6  -3   -0.76   48.94
 -16   6  -3  -40.84   59.31
 -17   6  -3  296.13  106.16
  18   5  -3   -3.90   18.91
  17   5  -3   30.64   20.48
  16   5  -3   14.03   17.82
  15   5  -3   11.35   17.29
  14   5  -3    0.63   14.71
  13   5  -3  -10.00   11.29
  12   5  -3   12.10   12.81
 -11  -5   3   61.46   15.76
  11   5  -3  102.41   19.91
  10   5  -3   13.72   11.85
 -10  -5   3   27.14   10.63
   9   5  -3  161.98   17.21
  -9  -5   3  198.04   15.66
   8   5  -3  231.73   18.65
  -8  -5   3  254.04   17.06
  -7  -5   3  229.36   14.78
   7   5  -3  228.41   16.94
  -6  -5   3  124.63   11.20
   6   5  -3  142.77   12.68
   5   5  -3  344.96   17.05
  -5  -5   3  336.17   15.84
  -4  -5   3   70.21    7.67
   4   5  -3   61.85    8.65
  -3  -5   3 1099.22   29.15
   3   5  -3 1125.12   28.75
  -2  -5   3   14.88    5.02
   2   5  -3   21.96    5.09
  -1  -5   3   53.16    5.96
   1   5  -3   49.34    5.19
   0  -5   3 1366.56   28.60
   0   5  -3 1332.62   30.24
   0  -5   3 1349.93   30.94
   1  -5   3  141.66    8.87
  -1   5  -3  139.80    8.82
   1  -5   3  150.54    8.49
  -2   5  -3  498.52   17.25
   2  -5   3  499.50   18.17
   3  -5   3  372.60   17.11
  -3   5  -3  383.24   16.19
  -4   5  -3  246.44   14.68
   4  -5   3  231.25   15.03
   5  -5   3  124.21   12.03
   6  -5   3  506.10   24.76
   6  -5   3  515.57   25.58
   7  -5   3  152.08   16.17
   8  -5   3   -2.36    8.85
   9  -5   3   -6.71    9.92
  10  -5   3   81.29   18.19
  11  -5   3  117.24   22.66
  12  -5   3  128.74   23.40
  13  -5   3   23.60   16.36
  14  -5   3   19.88   18.28
 -16   5  -3   75.29   65.48
 -17   5  -3  784.12  165.66
  18   4  -3   45.15   24.75
  17   4  -3  -12.26   15.56
  16   4  -3   38.83   21.28
  15   4  -3   59.97   21.51
  14   4  -3   -8.86   14.30
  13   4  -3   -8.85   12.33
  12   4  -3  415.89   30.67
 -11  -4   3  284.28   21.76
  11   4  -3  354.41   26.55
 -10  -4   3  150.85   15.00
  10   4  -3  153.15   17.45
  -9  -4   3  204.19   16.21
   9   4  -3  182.72   17.96
   8   4  -3  104.62   15.72
  -8  -4   3  118.35   15.36
   7   4  -3  261.55   17.45
  -7  -4   3  257.21   15.62
   6   4  -3   18.53    7.54
  -6  -4   3   24.14    7.90
   5   4  -3  109.81   10.11
  -5  -4   3   95.67    9.58
  -4  -4   3  609.20   20.75
   4   4  -3  583.41   20.24
  -3  -4   3   51.27    7.38
   3   4  -3   59.38    7.39
  -2  -4   3 2842.52   56.67
   2   4  -3 2768.45   53.61
  -1  -4   3   -1.48    2.68
   1   4  -3    7.46    3.12
   0   4  -3 1660.70   34.46
   0  -4   3 1632.81   32.76
   0  -4   3 1670.05   35.31
   1  -4   3 1916.03   39.37
   1  -4   3 1950.76   39.82
  -1   4  -3 1927.57   40.08
  -2   4  -3 1627.72   36.90
   2  -4   3 1564.85   36.85
   3  -4   3   53.96    9.18
  -3   4  -3   86.77    7.93
   4  -4   3   74.44   10.16
   4  -4   3   75.01   10.91
   5  -4   3 1422.46   41.72
   5  -4   3 1439.38   41.23
   6  -4   3   11.73    9.83
   6  -4   3   37.65    9.85
   7  -4   3  326.80   21.59
   7  -4   3  313.07   21.46
   8  -4   3    6.43    9.81
   9  -4   3  238.11   21.50
  10  -4   3   60.53   17.45
  11  -4   3   12.86   15.81
  12  -4   3    8.61   14.07
  13  -4   3  358.94   30.45
  14  -4   3  110.70   25.36
  15  -4   3    0.65   18.91
 -17   4  -3  -44.16  123.98
  18   3  -3    5.41   20.75
  17   3  -3   -1.10   18.14
  16   3  -3   48.19   21.90
  15   3  -3    5.41   16.08
  14   3  -3   47.25   19.38
  13   3  -3  -16.50   11.73
  12   3  -3  316.18   26.36
  11   3  -3 1291.44   49.85
 -11  -3   3 1278.73   44.01
 -10  -3   3    5.03    8.74
  10   3  -3    6.36   10.45
  -9  -3   3  199.76   16.10
   9   3  -3  193.05   17.77
  -8  -3   3 2372.07   58.75
   8   3  -3 2322.20   61.97
   7   3  -3  394.72   20.94
  -7  -3   3  382.78   19.08
  -6  -3   3  276.80   15.23
   6   3  -3  254.69   15.58
  -5  -3   3  416.82   17.97
   5   3  -3  397.17   17.65
   4   3  -3  444.23   16.98
  -4  -3   3  434.40   17.24
   3   3  -3 1299.71   30.45
  -3  -3   3 1314.62   32.54
   2   3  -3  215.64    8.94
  -2  -3   3  215.72   10.44
   1   3  -3  398.19   11.69
  -1  -3   3  380.16   13.02
   0   3  -3  300.54   10.05
   0  -3   3  283.01    9.62
   0  -3   3  288.34   10.34
   1  -3   3  926.78   22.97
   1  -3   3  927.36   21.40
  -1   3  -3  894.39   22.44
  -2   3  -3  713.53   21.09
   2  -3   3  721.54   21.64
   3  -3   3   -2.18    4.84
   3  -3   3   -6.38    3.83
   4  -3   3   -4.28    4.96
   4  -3   3   -2.01    4.85
   5  -3   3 1633.93   44.86
   5  -3   3 1635.00   44.95
   6  -3   3  485.10   24.71
   6  -3   3  511.09   24.96
   7  -3   3   -0.19    8.98
   7  -3   3    4.14    9.01
   8  -3   3  311.77   22.35
   8  -3   3  336.06   23.11
   9  -3   3   15.49   12.37
  10  -3   3  335.95   26.05
  11  -3   3   36.52   17.05
  12  -3   3  265.47   31.45
  13  -3   3  106.75   23.95
  14  -3   3  245.78   33.62
  15  -3   3    9.45   19.07
  16  -3   3   14.89   19.59
  18   2  -3   69.69   24.20
  17   2  -3    2.38   17.77
  16   2  -3  177.11   30.09
  15   2  -3    5.15   16.10
  14   2  -3  247.80   30.59
  13   2  -3   -5.87   13.05
  12   2  -3   59.79   17.61
  11   2  -3   15.41   13.24
 -11  -2   3   -6.73   13.58
 -10  -2   3  143.88   15.22
  10   2  -3  149.94   19.92
  -9  -2   3  124.09   13.85
   9   2  -3  146.07   18.47
   8   2  -3  268.78   18.98
  -8  -2   3  263.89   17.99
  -7  -2   3  138.01   12.07
   7   2  -3  140.74   13.25
  -6  -2   3   -3.70    4.54
   6   2  -3   -1.99    4.93
  -5  -2   3   45.09    7.93
   5   2  -3   64.32    9.43
  -4  -2   3 1636.99   39.66
   4   2  -3 1645.90   38.13
   3   2  -3 1164.62   27.06
  -3  -2   3 1116.04   29.18
  -3  -2   3 1109.25   22.56
  -2  -2   3    8.90    4.09
   2   2  -3   12.43    3.04
  -1  -2   3  170.82    8.18
   0   2  -3  233.47    8.14
   0  -2   3  240.58    8.87
   0  -2   3  236.36    8.51
   1  -2   3  748.00   19.61
  -1   2  -3  758.34   19.26
   1  -2   3  742.05   17.53
   2  -2   3 1178.66   28.94
   2  -2   3 1180.46   29.22
   3  -2   3   25.70    6.81
   3  -2   3   24.77    6.68
   4  -2   3  789.90   26.84
   4  -2   3  859.88   27.76
   5  -2   3   55.02    9.48
   5  -2   3   52.84   10.82
   6  -2   3 6068.79  122.55
   6  -2   3 6130.01  120.21
   7  -2   3  269.41   19.64
   7  -2   3  276.39   20.12
   8  -2   3   10.17   10.39
   8  -2   3   -4.54    9.50
   9  -2   3   45.67   14.37
  10  -2   3    4.06   11.10
  11  -2   3   24.21   15.03
  12  -2   3  200.99   28.54
  13  -2   3   95.00   23.31
  14  -2   3  398.31   34.32
  15  -2   3   -0.10   17.32
  16  -2   3    0.12   20.09
  17  -2   3  -11.54   18.73
  18   1  -3   11.04   21.95
  17   1  -3   64.80   24.78
  16   1  -3   47.12   21.01
  15   1  -3   76.08   21.63
  14   1  -3   95.49   22.69
  13   1  -3  133.81   23.67
  12   1  -3   37.05   15.73
  11   1  -3  417.66   28.18
 -11  -1   3  438.18   26.60
 -10  -1   3   21.62   10.90
  10   1  -3   19.78   11.82
  -9  -1   3   37.65   11.40
   9   1  -3   45.01   12.72
   8   1  -3  193.66   16.42
   7   1  -3  100.73   11.45
   6   1  -3    5.41    6.09
   5   1  -3   12.53    5.83
   4   1  -3  125.93    8.97
   3   1  -3 2535.67   48.44
  -3  -1   3 2387.14   44.26
  -1  -1   3  365.94   10.03
  -1  -1   3  370.11   12.33
   0  -1   3  578.98   14.91
   0  -1   3  548.87   14.34
   1  -1   3  373.37   12.65
   2  -1   3 2405.90   48.66
   2  -1   3 2404.74   49.24
   3  -1   3 3236.45   65.75
   3  -1   3 3203.69   64.29
   4  -1   3  139.84   11.42
   4  -1   3  163.01   12.04
   5  -1   3 1031.80   33.03
   5  -1   3  996.23   32.69
   6  -1   3   85.90   14.23
   6  -1   3   73.86   14.10
   7  -1   3   18.25   10.46
   7  -1   3   27.79   11.19
   8  -1   3  355.00   23.37
   8  -1   3  343.02   22.82
   9  -1   3   12.24   10.88
   9  -1   3    0.27    9.81
  10  -1   3  313.37   25.35
  11  -1   3  237.08   22.72
  12  -1   3    1.52   14.99
  13  -1   3  141.06   26.20
  14  -1   3  206.91   30.67
  15  -1   3   86.68   26.42
  16  -1   3  -13.89   17.06
  17  -1   3   72.40   26.75
  18   0  -3  -18.21   17.03
  17   0  -3   17.74   19.32
  16   0  -3  -16.65   15.06
  15   0  -3  208.62   30.69
  14   0  -3   14.29   15.93
  13   0  -3   21.59   13.79
  12   0  -3    8.72   12.82
 -11   0   3  561.83   29.53
  11   0  -3  598.66   32.91
  10   0  -3   -6.94    8.98
   9   0  -3  215.75   18.37
   8   0  -3   -7.24    6.86
   7   0  -3   89.78   12.65
   6   0  -3   -6.84    4.14
   5   0  -3   14.49    6.04
   4   0  -3   -2.54    3.30
   3   0  -3 6049.84  102.93
  -3   0   3 5687.12   97.99
  -2   0   3   -1.56    2.23
  -1   0   3  408.56   11.15
   0   0   3    2.32    2.23
   1   0   3  703.52   18.38
   1   0   3  694.95   17.86
   2   0   3   -0.42    4.38
   2   0   3    4.98    4.43
   3   0   3   30.21    6.90
   3   0   3   28.25    6.71
   4   0   3   -4.75    4.54
   4   0   3   -3.48    4.50
   5   0   3  392.56   19.56
   5   0   3  412.50   19.87
   6   0   3   -3.20    8.69
   6   0   3   18.14   10.31
   7   0   3 1070.59   38.66
  -7   0  -3 1028.37   23.81
   7   0   3 1021.50   37.13
   8   0   3   -1.94    8.53
   8   0   3   -4.04    8.48
   9   0   3 1018.36   41.47
   9   0   3  898.45   38.78
  10   0   3    7.32   12.20
  11   0   3  203.72   22.56
  12   0   3   -1.45   14.62
  13   0   3  449.93   34.21
  14   0   3   75.72   24.43
  15   0   3    3.05   16.87
  16   0   3  -10.51   20.26
  17   0   3  -12.64   21.80
  18  -1  -3   19.75   21.51
  17  -1  -3   69.55   24.40
  16  -1  -3   51.77   21.46
  15  -1  -3  101.19   24.13
  14  -1  -3  114.35   23.52
  13  -1  -3  111.47   21.05
  12  -1  -3   35.87   14.63
  11  -1  -3  417.58   28.09
  10  -1  -3   15.65   11.16
   9  -1  -3   29.48   11.82
   8  -1  -3  189.31   16.22
   7  -1  -3  110.29   11.79
   6  -1  -3   11.45    6.41
   5  -1  -3   23.27    6.40
   4  -1  -3  114.19    8.41
   3  -1  -3 2598.99   49.57
  -2   1   3   10.49    3.00
  -1   1   3  338.80   10.32
   0   1   3  574.94   15.03
   1   1   3  347.18   11.66
   1   1   3  353.11   11.98
   2   1   3 2433.17   48.66
   2   1   3 2440.99   49.87
   3   1   3 3173.36   64.82
   3   1   3 3134.13   62.48
   4   1   3  165.14   11.76
   4   1   3  171.61   12.42
   5   1   3  949.49   31.89
   5   1   3  972.08   31.23
   6   1   3   67.53   11.80
   6   1   3   92.40   14.06
   7   1   3   20.32   10.03
   7   1   3   13.54   10.78
   8   1   3  383.08   24.55
   8   1   3  371.28   23.56
   9   1   3    8.83   10.79
   9   1   3    0.80    8.91
  10   1   3  253.10   23.32
  10   1   3  267.44   23.17
  11   1   3  232.36   23.39
  12   1   3   -8.29   14.11
  13   1   3   99.32   23.50
  14   1   3  242.40   33.06
  15   1   3   63.56   24.89
  16   1   3    6.83   19.73
  17   1   3   67.06   27.51
  18  -2  -3   87.90   26.75
  17  -2  -3  -11.16   18.35
  16  -2  -3  184.26   30.47
  15  -2  -3   -2.15   15.51
  14  -2  -3  227.93   30.20
  13  -2  -3    3.87   13.47
  12  -2  -3   94.81   19.38
  11  -2  -3   31.71   13.73
  10  -2  -3  138.85   19.27
   9  -2  -3  121.77   17.25
   8  -2  -3  272.17   18.64
   7  -2  -3  130.95   12.57
   6  -2  -3   -5.47    4.49
   5  -2  -3   72.02    9.19
   4  -2  -3 1708.48   37.69
   3  -2  -3 1120.63   24.98
  -2   2   3    9.65    3.30
  -1   2   3  157.94    7.14
   0   2   3  254.36    9.44
   1   2   3  787.95   20.12
   1   2   3  796.93   19.76
   2   2   3 1193.98   28.53
   2   2   3 1178.09   29.27
   3   2   3   30.36    6.80
   3   2   3   26.34    7.05
   4   2   3  820.82   25.95
   4   2   3  824.90   27.51
   5   2   3   45.93   10.31
   5   2   3   59.17   10.02
   6   2   3 5909.52  114.81
   6   2   3 5843.23  119.13
   7   2   3  235.09   18.63
   7   2   3  262.38   19.71
   8   2   3    8.52    9.98
   8   2   3    2.24    9.10
   9   2   3   39.74   13.39
   9   2   3   40.47   14.41
  10   2   3   13.75   12.92
  10   2   3    1.70   11.26
  11   2   3   43.46   15.68
  12   2   3  152.05   25.51
  13   2   3   76.38   22.46
  14   2   3  443.21   35.86
  15   2   3    0.51   15.42
  16   2   3   12.88   19.83
  17   2   3    0.72   22.45
  18  -3  -3   11.68   20.48
  17  -3  -3  -15.69   16.51
  16  -3  -3   18.72   18.52
  15  -3  -3   10.67   16.97
  14  -3  -3   37.80   18.38
  13  -3  -3   14.89   15.27
  12  -3  -3  380.33   28.42
  11  -3  -3 1284.61   48.21
  10  -3  -3    4.97    9.90
   9  -3  -3  180.90   17.58
   8  -3  -3 2329.70   60.21
   7  -3  -3  385.54   19.73
   6  -3  -3  261.07   14.83
   5  -3  -3  388.56   16.48
   4  -3  -3  464.19   15.68
   3  -3  -3 1317.51   28.10
  -2   3   3  211.84    9.15
  -1   3   3  388.60   12.04
   0   3   3  299.21   10.66
   1   3   3  944.31   22.69
   1   3   3  937.63   23.01
   2   3   3  705.12   20.54
   2   3   3  771.55   21.98
   3   3   3    0.62    4.30
   3   3   3   -4.04    4.40
   4   3   3    7.62    5.37
   4   3   3    4.29    5.27
   5   3   3 1706.77   43.66
   5   3   3 1604.86   45.37
   6   3   3  479.39   22.92
   6   3   3  476.68   24.72
   7   3   3   -5.23    8.26
   7   3   3   -6.34    7.32
   8   3   3  298.67   21.00
   8   3   3  288.17   21.61
   9   3   3   17.62   12.34
   9   3   3   12.44   11.04
  10   3   3  329.87   25.86
  10   3   3  316.89   24.68
  11   3   3   48.57   14.93
  11   3   3   48.80   16.91
  12   3   3  187.12   27.10
  13   3   3   93.16   22.77
  14   3   3  193.21   31.38
  15   3   3    7.81   19.76
  16   3   3  -13.36   19.83
  17   3   3   -6.94   22.04
  18  -4  -3   49.45   25.15
  17  -4  -3   -9.73   17.97
  16  -4  -3   41.99   20.39
  15  -4  -3   37.38   19.72
  14  -4  -3    4.86   14.33
  13  -4  -3  -10.59   12.85
  12  -4  -3  411.56   28.90
  11  -4  -3  346.19   25.51
  10  -4  -3  167.18   17.72
   9  -4  -3  190.94   17.51
   8  -4  -3  107.91   15.17
   7  -4  -3  255.97   16.30
   6  -4  -3   22.81    7.75
   5  -4  -3  100.85    8.90
   4  -4  -3  599.66   18.39
  -2   4   3 2785.79   52.50
  -1   4   3   -0.67    2.93
   0   4   3 1609.77   33.28
   1   4   3 1972.18   39.87
   1   4   3 1939.02   39.64
   2   4   3 1643.52   36.90
   2   4   3 1530.80   34.81
   3   4   3   72.36    7.40
   3   4   3   75.10    8.49
   4   4   3   67.67    9.43
   4   4   3   73.55   10.66
   5   4   3 1412.86   41.66
   5   4   3 1443.71   39.10
   6   4   3   18.38   10.26
   6   4   3   20.09    9.03
   7   4   3  261.56   18.67
   7   4   3  298.24   21.09
   8   4   3    5.68    9.66
   8   4   3   -3.82    8.75
   9   4   3  235.93   19.95
   9   4   3  192.09   19.70
  10   4   3   41.79   14.35
  10   4   3   46.11   13.83
  11   4   3    6.00   13.01
  11   4   3   29.84   14.81
  12   4   3    8.85   14.51
  13   4   3  346.01   30.55
  14   4   3  100.31   24.50
  15   4   3    5.38   17.79
  16   4   3   27.66   22.10
  17   4   3    7.22   21.52
  17  -5  -3   40.40   22.52
  16  -5  -3   -8.53   15.23
  15  -5  -3   19.18   18.23
  14  -5  -3  -13.60   13.00
  13  -5  -3   -7.88   13.75
  12  -5  -3   19.34   13.63
  11  -5  -3  130.70   20.95
  10  -5  -3    7.27   10.37
   9  -5  -3  156.42   16.26
   8  -5  -3  259.60   18.44
   7  -5  -3  251.66   16.82
   6  -5  -3  146.97   11.58
   5  -5  -3  359.52   15.86
   4  -5  -3   68.92    6.42
  -3   5   3 1161.31   25.49
  -2   5   3   21.15    5.18
  -1   5   3   60.02    5.74
   0   5   3 1344.20   27.32
   0   5   3 1299.84   29.14
   1   5   3  137.74    8.00
   1   5   3  137.74    8.39
   2   5   3  491.12   16.46
   2   5   3  491.97   17.32
   3   5   3  393.40   15.59
   3   5   3  370.23   16.59
   4   5   3  223.05   13.07
   4   5   3  227.62   14.55
   5   5   3  122.39   11.64
   5   5   3  121.11   12.77
   6   5   3  504.66   25.26
   6   5   3  541.86   23.70
   7   5   3  133.74   14.74
   7   5   3  154.69   16.48
   8   5   3   -7.80    8.78
   8   5   3  -19.27    6.43
   9   5   3    2.86   10.41
   9   5   3   -9.77    9.31
  10   5   3   69.72   15.56
  10   5   3  102.37   19.14
  11   5   3  121.98   22.44
  11   5   3   56.62   18.63
  12   5   3  111.35   24.22
  13   5   3   31.69   19.11
  14   5   3   14.44   19.66
  15   5   3   55.80   22.71
  16   5   3    6.72   20.77
  17   5   3  136.23   32.32
  16  -6  -3   -9.28   15.89
  15  -6  -3    3.88   16.43
  14  -6  -3   -6.12   14.28
  13  -6  -3   16.92   16.19
  12  -6  -3   61.50   17.99
  11  -6  -3  215.35   21.36
  10  -6  -3  170.67   17.91
   9  -6  -3  179.81   20.44
   8  -6  -3    2.24    8.62
   7  -6  -3 1216.41   37.30
   6  -6  -3   23.38    7.41
  -4   6   3   18.07    5.20
  -3   6   3   23.95    4.60
  -2   6   3  383.13   14.40
  -2   6   3  396.11   11.23
  -1   6   3   45.26    3.87
  -1   6   3   29.34    5.73
   0   6   3   66.94    7.44
   0   6   3   53.25    4.99
   1   6   3  143.15    8.60
   1   6   3  143.03    8.50
   2   6   3    4.54    3.75
   2   6   3    1.45    4.17
   3   6   3  271.11   13.10
   3   6   3  307.18   15.29
   4   6   3   27.26    6.84
   4   6   3   19.32    7.36
   5   6   3   18.60    7.73
   5   6   3   12.00    8.67
   6   6   3  658.62   26.12
   7   6   3 1127.77   41.35
   7   6   3 1194.13   38.91
   8   6   3    1.22    8.60
   8   6   3   -3.16    7.58
   9   6   3  111.73   19.73
   9   6   3  102.78   17.03
  10   6   3   28.46   13.30
  10   6   3   21.46   11.36
  11   6   3  424.05   28.93
  11   6   3  435.56   31.38
  12   6   3   -6.76   13.03
  12   6   3  -10.90   13.60
  13   6   3  108.97   24.07
  14   6   3    1.53   16.23
  15   6   3   15.51   18.83
  16   6   3  -20.85   18.56
  17   6   3   19.09   23.97
  15  -7  -3   55.51   21.03
  14  -7  -3   -8.06   14.51
  13  -7  -3  113.21   22.54
  12  -7  -3  331.41   26.30
  11  -7  -3  543.52   31.16
  10  -7  -3  469.60   27.25
   9  -7  -3   -8.62    8.42
   8  -7  -3  590.91   26.65
   7  -7  -3   10.80    7.55
  -6   7   3  683.83   24.40
  -5   7   3    1.86    5.12
  -4   7   3  712.54   20.68
  -3   7   3 1495.09   31.94
  -2   7   3    2.69    2.98
  -1   7   3  836.69   19.06
  -1   7   3  846.00   22.64
   0   7   3 1133.82   25.60
   0   7   3 1137.44   27.30
   1   7   3 1642.20   36.08
   1   7   3 1664.15   36.60
   2   7   3    4.77    4.58
   2   7   3    1.92    3.89
   3   7   3 1890.90   45.61
   3   7   3 1860.39   42.06
   4   7   3    1.59    5.87
   4   7   3   -3.29    4.56
   5   7   3   39.87    9.10
   5   7   3   33.83   10.31
   6   7   3  386.17   19.75
   7   7   3  236.36   17.21
   7   7   3  216.80   19.22
   8   7   3   -1.46    9.87
   8   7   3   -2.83    8.92
   9   7   3  -14.02    9.73
   9   7   3    4.63   10.13
  10   7   3  144.41   20.92
  10   7   3  143.06   22.61
  11   7   3   32.37   17.29
  11   7   3   29.60   14.61
  12   7   3    4.90   12.00
  12   7   3  -14.51   12.09
  13   7   3   -4.60   15.37
  14   7   3   33.47   21.37
  15   7   3   79.79   23.94
  16   7   3   36.18   21.60
  17   7   3   62.78   29.47
 -17   8   3   81.79  155.20
 -16   8   3  171.17   86.73
 -15   8   3  -55.97   43.87
  13  -8  -3  131.24   22.72
  12  -8  -3  287.86   24.93
  11  -8  -3  173.15   22.53
  10  -8  -3   89.89   16.98
   9  -8  -3    4.36    9.13
  -7   8   3  199.73   15.50
  -6   8   3    1.90    6.21
  -5   8   3   -3.39    4.38
  -4   8   3  711.21   20.86
  -3   8   3  453.98   14.62
  -2   8   3 3356.51   65.74
  -2   8   3 3440.34   62.22
  -1   8   3  264.19    9.56
  -1   8   3  262.18   11.68
   0   8   3  612.57   17.19
   0   8   3  606.40   18.65
   1   8   3   86.28    7.25
   1   8   3   85.94    7.16
   2   8   3  722.43   23.26
   2   8   3  734.41   21.71
   3   8   3  105.19    8.79
   3   8   3   97.91    9.92
   4   8   3   -5.09    4.72
   4   8   3   -2.07    5.99
   5   8   3 1523.09   40.11
   5   8   3 1500.83   44.64
   6   8   3   47.30   10.25
   7   8   3  158.37   20.09
   7   8   3  144.03   14.83
   8   8   3  247.65   19.17
   8   8   3  226.01   20.60
   9   8   3  142.46   19.15
   9   8   3   99.00   19.42
  10   8   3  162.26   24.48
  10   8   3  191.32   23.98
  11   8   3   79.83   20.91
  11   8   3   90.91   19.20
  12   8   3    2.10   15.31
  12   8   3  -24.48   12.06
  13   8   3   -0.37   15.87
  14   8   3   31.23   21.77
  15   8   3   -5.96   18.36
  16   8   3  117.60   28.34
  17   8   3    0.00   22.00
 -17   9   3   72.49  105.25
 -16   9   3  -27.22   56.31
 -15   9   3   39.41   42.74
 -14   9   3   77.44   36.02
 -13   9   3  232.35   41.02
 -12   9   3  359.91   33.83
 -11   9   3   11.08   16.23
 -10   9   3  115.55   21.04
  -9   9   3    5.38   10.90
  -8   9   3  263.95   18.44
  -7   9   3   12.25    8.54
  -6   9   3 1498.16   39.95
  -5   9   3    9.42    6.09
  -4   9   3 1335.56   32.46
  -3   9   3  186.28    9.50
  -2   9   3   35.10    5.32
  -1   9   3   19.80    5.30
  -1   9   3   27.79    4.64
   0   9   3   16.42    5.23
   0   9   3   13.59    4.26
   1   9   3  230.50   11.43
   1   9   3  243.59   11.73
   2   9   3   23.25    6.73
   2   9   3   20.41    5.73
   3   9   3   53.68    8.33
   3   9   3   56.31    9.69
   4   9   3  218.12   13.03
   4   9   3  197.21   14.77
   5   9   3  593.57   22.92
   5   9   3  610.34   26.94
   6   9   3 1898.53   48.61
   6   9   3 1798.55   53.18
   7   9   3   23.76   11.86
   7   9   3   18.54    9.55
   8   9   3  633.77   32.92
   8   9   3  676.60   30.15
   9   9   3  -14.38    9.88
   9   9   3    9.14    8.98
  10   9   3  242.63   24.33
  10   9   3  275.09   22.29
  11   9   3   -6.20   12.76
  11   9   3   -5.37   12.73
  12   9   3  165.78   27.05
  12   9   3  128.83   23.09
  13   9   3   23.65   19.88
  14   9   3  -14.99   16.27
  15   9   3    4.94   19.90
  16   9   3   46.67   24.33
  17   9   3   -7.82   18.66
 -18  10   3  497.19  215.63
 -17  10   3   21.54   69.55
 -16  10   3  352.42   73.30
 -15  10   3    0.35   35.59
 -14  10   3  429.44   43.93
 -13  10   3   61.25   26.96
 -12  10   3  139.07   28.95
 -11  10   3   18.19   17.13
 -10  10   3   30.27   15.06
  -9  10   3   -3.70    8.70
  -8  10   3   -7.74    8.79
  -7  10   3  171.24   14.73
  -6  10   3  419.14   19.07
  -5  10   3 1320.19   34.68
  -4  10   3  254.91   12.90
  -3  10   3   74.97    7.94
  -3  10   3   67.36    6.87
  -2  10   3 1329.32   30.01
  -2  10   3 1285.89   33.73
  -1  10   3   87.48    7.80
  -1  10   3   89.23    6.56
   0  10   3    6.48    3.92
   0  10   3   13.15    4.71
   1  10   3   64.14    8.09
   1  10   3   79.91    7.53
   2  10   3 1461.32   37.69
   2  10   3 1469.38   35.41
   3  10   3   63.43    9.28
   3  10   3   58.67   10.32
   4  10   3 1119.74   36.04
   4  10   3 1117.78   31.90
   5  10   3   14.18    9.22
   5  10   3   12.86    7.62
   6  10   3  159.96   16.65
   6  10   3  200.24   14.67
   7  10   3  747.05   29.76
   7  10   3  705.11   33.24
   8  10   3    8.56   11.65
   8  10   3    5.00    9.20
   9  10   3   11.97   11.11
   9  10   3    2.37   12.22
  10  10   3   16.12   15.28
  10  10   3   23.05   12.72
  11  10   3  137.95   24.52
  11  10   3  166.13   24.57
  12  10   3  123.80   25.46
  13  10   3   21.16   18.51
  14  10   3   63.49   24.60
  15  10   3   13.51   20.01
  16  10   3  156.12   33.06
 -18  11   3  458.21  136.43
 -17  11   3  481.08   89.56
 -16  11   3    3.94   40.29
 -15  11   3  201.21   47.74
 -14  11   3   60.46   29.54
 -13  11   3  323.61   39.17
 -12  11   3   55.13   22.44
 -11  11   3    4.02   14.55
 -10  11   3 1210.58   45.94
  -9  11   3   16.49   11.53
  -8  11   3   63.36   13.21
  -7  11   3  124.75   14.53
  -6  11   3    8.48    7.25
  -5  11   3  817.85   26.23
  -4  11   3  513.38   18.50
  -3  11   3  962.05   29.92
  -3  11   3  949.41   25.72
  -2  11   3   36.43    6.19
  -1  11   3   35.98    6.97
  -1  11   3   56.05    6.72
   0  11   3  394.79   14.84
   0  11   3  384.75   15.61
   1  11   3  244.65   12.44
   1  11   3  246.02   12.74
   2  11   3   62.31    9.67
   2  11   3   44.88    8.12
   3  11   3 2332.03   51.73
   3  11   3 2432.28   57.10
   4  11   3 1323.70   35.85
   4  11   3 1344.02   40.74
   5  11   3    2.28    8.61
   5  11   3   10.34    6.53
   6  11   3    3.16    7.23
   6  11   3  -12.86    7.80
   7  11   3   75.32   13.68
   7  11   3   69.46   15.61
   8  11   3  586.48   32.34
   8  11   3  594.99   28.36
   9  11   3   14.53   11.14
   9  11   3   13.91   13.23
  10  11   3   56.35   16.64
  10  11   3   38.51   14.12
  11  11   3   10.74   12.03
  11  11   3    8.42   13.69
  12  11   3   61.21   19.95
  13  11   3   51.64   21.98
  14  11   3  -23.08   15.73
  15  11   3  135.65   29.56
  16  11   3   16.29   23.14
 -18  12   3   24.20   93.21
 -17  12   3   27.06   53.79
 -16  12   3   15.49   33.75
 -15  12   3   59.97   34.76
 -14  12   3  152.92   33.75
 -13  12   3  268.74   36.80
 -12  12   3    4.76   16.21
 -11  12   3  465.02   30.85
 -10  12   3   77.44   16.77
  -9  12   3  788.07   33.51
  -8  12   3  147.74   17.85
  -7  12   3  716.28   27.64
  -6  12   3  178.84   13.57
  -5  12   3  409.52   18.58
  -4  12   3  679.26   22.42
  -3  12   3  686.92   21.17
  -3  12   3  587.48   23.16
  -2  12   3   31.48    6.35
  -2  12   3   30.62    7.58
  -1  12   3  100.52    8.92
  -1  12   3  106.47    7.62
   0  12   3  722.87   22.01
   0  12   3  712.09   22.74
   1  12   3  182.78   11.60
   1  12   3  167.57   11.35
   2  12   3  197.00   13.24
   2  12   3  181.90   11.98
   3  12   3  319.34   15.77
   3  12   3  380.23   19.80
   4  12   3  282.80   18.31
   4  12   3  305.87   15.87
   5  12   3 1046.00   32.16
   5  12   3  965.58   36.08
   6  12   3  148.86   19.05
   6  12   3  135.98   13.18
   7  12   3  465.77   27.53
   7  12   3  441.71   23.12
   8  12   3   30.57   12.03
   8  12   3   31.87   13.65
   9  12   3 1228.10   49.78
   9  12   3 1225.16   43.99
  10  12   3   14.46   12.06
  10  12   3    3.01   14.67
  11  12   3  195.35   28.22
  12  12   3  109.18   25.01
  13  12   3   46.15   21.26
  14  12   3  -11.97   16.58
  15  12   3   54.80   23.93
  16  12   3  -27.24   18.36
 -18  13   3  136.34   88.23
 -17  13   3   74.12   55.47
 -16  13   3    6.88   28.92
 -15  13   3  381.42   43.37
 -14  13   3   71.34   27.97
 -13  13   3  231.14   33.09
 -12  13   3  235.29   30.66
 -11  13   3  225.55   23.82
 -10  13   3   59.27   16.45
  -9  13   3  152.42   16.80
  -8  13   3   95.27   14.77
  -7  13   3   48.14   11.52
  -6  13   3   69.13   12.01
  -5  13   3 1516.10   39.98
  -4  13   3   97.61   10.17
  -3  13   3  321.15   14.66
  -3  13   3  299.89   17.17
  -2  13   3   73.23   10.47
  -1  13   3  221.87   12.96
  -1  13   3  233.04   11.82
   0  13   3  185.55   11.75
   0  13   3  185.15   11.21
   1  13   3 1848.66   44.81
   1  13   3 1877.93   43.08
   2  13   3   99.48   12.52
   2  13   3  107.92   12.32
   3  13   3   51.87    9.42
   3  13   3   60.98   11.59
   4  13   3  120.30   13.27
   4  13   3  137.02   11.84
   5  13   3  341.78   21.38
   5  13   3  312.85   17.22
   6  13   3  233.71   16.38
   6  13   3  288.12   21.16
   7  13   3   38.85   14.02
   7  13   3   38.89   11.85
   8  13   3  292.73   20.50
   8  13   3  284.56   23.61
   9  13   3   66.32   18.61
   9  13   3   74.57   15.73
  10  13   3  311.36   27.48
  10  13   3  333.43   24.00
  11  13   3   22.06   16.04
  12  13   3   56.87   20.22
  13  13   3  300.12   30.47
  14  13   3   47.30   22.77
  15  13   3   36.45   23.20
  16  13   3  -12.41   21.89
 -17  14   3   31.36   44.15
 -16  14   3  311.66   52.59
 -15  14   3   20.44   28.55
 -14  14   3  513.04   41.22
 -13  14   3  121.80   26.71
 -12  14   3   92.02   24.09
 -11  14   3    4.22   16.00
 -10  14   3   14.39   14.17
  -9  14   3  582.65   28.97
  -8  14   3   28.07   11.16
  -7  14   3  344.69   19.73
  -6  14   3  548.91   23.49
  -5  14   3  357.31   17.71
  -4  14   3  609.55   22.61
  -3  14   3  218.71   12.89
  -3  14   3  202.99   14.88
  -2  14   3  175.02   13.02
  -2  14   3  184.00   11.44
  -1  14   3   99.90    8.50
  -1  14   3  108.15   10.02
   0  14   3 1266.79   33.99
   0  14   3 1263.45   33.78
   1  14   3  176.53   12.71
   1  14   3  178.55   12.16
   2  14   3  599.48   24.00
   2  14   3  581.79   21.47
   3  14   3  450.75   22.02
   3  14   3  457.46   19.24
   4  14   3  771.82   26.82
   4  14   3  769.89   30.77
   5  14   3  776.17   32.71
   5  14   3  781.68   27.84
   6  14   3  290.89   21.80
   6  14   3  295.84   18.23
   7  14   3   -7.29    7.73
   7  14   3    3.21   10.05
   8  14   3   22.41   12.90
   8  14   3    3.19    9.39
   9  14   3  156.22   20.47
   9  14   3  183.07   25.15
  10  14   3   -6.46   13.84
  11  14   3  -15.68   14.17
  12  14   3  253.71   33.30
  13  14   3   17.94   18.99
  14  14   3  122.20   29.20
  15  14   3    3.05   20.98
  16  14   3  133.95   33.44
 -17  15   3   66.23   44.99
 -16  15   3   56.61   32.18
 -15  15   3   43.66   28.02
 -14  15   3  213.07   34.03
 -13  15   3   -3.70   15.44
 -12  15   3  104.51   23.52
 -11  15   3  122.38   22.61
 -10  15   3 1340.13   47.81
  -9  15   3   10.23   12.23
  -8  15   3  398.47   23.06
  -7  15   3   21.73    9.84
  -6  15   3  731.57   27.74
  -5  15   3   -3.86    6.33
  -4  15   3  507.39   21.00
  -3  15   3  532.73   23.93
  -3  15   3  519.40   20.37
  -2  15   3   25.92    7.02
  -1  15   3   78.38    8.35
  -1  15   3   77.23   11.10
   0  15   3  618.28   22.73
   0  15   3  636.09   22.74
   1  15   3  607.25   22.76
   1  15   3  620.75   23.79
   2  15   3  999.15   29.72
   2  15   3  997.13   32.65
   3  15   3    1.29    5.89
   3  15   3   -3.03    6.53
   4  15   3  256.19   15.81
   4  15   3  261.33   18.68
   5  15   3  212.41   18.26
   5  15   3  193.04   14.39
   6  15   3  246.50   17.08
   6  15   3  252.17   20.83
   7  15   3   55.39   12.88
   7  15   3   69.61   15.92
   8  15   3  962.47   42.70
   8  15   3  886.52   35.29
   9  15   3   40.89   17.06
   9  15   3   39.20   13.88
  10  15   3  206.27   28.34
  11  15   3  -20.31   14.22
  12  15   3  127.73   26.90
  13  15   3   -4.84   18.27
  14  15   3    4.10   21.24
  15  15   3   51.36   24.73
  16  15   3   -4.58   19.13
 -17  16   3    4.25   27.51
 -16  16   3  -10.11   26.80
 -15  16   3  103.34   31.44
 -14  16   3  280.03   31.49
 -13  16   3   15.54   19.11
 -12  16   3   75.17   21.45
 -11  16   3  178.31   26.17
 -10  16   3  172.18   19.40
  -9  16   3  140.87   20.41
  -8  16   3  221.91   18.30
  -7  16   3   13.05   10.00
  -6  16   3  617.97   26.11
  -5  16   3   62.73   11.32
  -4  16   3   96.95   12.19
  -3  16   3  113.25   10.73
  -3  16   3  140.94   14.05
  -2  16   3 4184.03   86.21
  -2  16   3 4144.57   82.26
  -1  16   3   99.44    9.77
  -1  16   3   99.35   10.72
   0  16   3 3232.76   68.74
   0  16   3 3227.21   67.91
   1  16   3   15.14    7.41
   1  16   3   21.74    8.46
   2  16   3  459.10   19.67
   2  16   3  467.75   22.11
   3  16   3  -12.39    6.21
   3  16   3   -1.86    6.08
   4  16   3  612.82   28.35
   4  16   3  596.72   24.09
   5  16   3   -8.16    8.41
   5  16   3    5.41    7.34
   6  16   3  379.52   24.90
   6  16   3  375.30   20.79
   7  16   3   62.35   13.56
   7  16   3   64.24   16.93
   8  16   3   33.75   14.24
   8  16   3   41.99   12.33
   9  16   3  690.07   38.24
  10  16   3   26.23   17.49
  11  16   3  -22.34   12.33
  12  16   3  199.39   31.46
  13  16   3   -0.13   18.53
  14  16   3    7.36   21.00
  15  16   3    1.27   20.46
  16  16   3   38.54   23.39
 -17  17   3   93.71   38.09
 -16  17   3   21.36   29.92
 -15  17   3  215.80   36.48
 -14  17   3   21.41   19.82
 -13  17   3  122.76   26.06
 -12  17   3  -17.50   14.24
 -11  17   3  251.66   24.06
 -10  17   3  335.65   25.36
  -9  17   3  -17.20   11.34
  -8  17   3  278.51   20.50
  -7  17   3   20.74   10.58
  -6  17   3 1387.36   41.76
  -5  17   3  378.44   19.81
  -4  17   3  206.41   14.80
  -3  17   3  602.31   23.07
  -3  17   3  602.37   26.93
  -1  17   3  831.35   26.99
  -1  17   3  798.64   28.21
   0  17   3  322.26   17.45
   0  17   3  280.80   16.15
   1  17   3 1255.20   37.59
   1  17   3 1282.75   35.65
   2  17   3  663.32   24.39
   2  17   3  575.42   25.51
   3  17   3   -2.42    7.96
   3  17   3   -1.22    6.37
   4  17   3   81.68   14.61
   4  17   3   59.36   11.35
   5  17   3  169.97   20.31
   5  17   3  124.02   13.19
   6  17   3  166.26   18.63
   6  17   3  166.90   14.65
   7  17   3  -11.30   10.23
   7  17   3  -17.60    6.96
   8  17   3    7.13   13.27
   8  17   3   10.46   11.05
   9  17   3    9.35   14.55
  10  17   3   -2.65   14.77
  11  17   3  -13.35   13.87
  12  17   3    2.63   19.05
  13  17   3  211.54   33.44
  14  17   3   -0.44   20.40
  15  17   3   40.36   24.14
  16  17   3  -12.72   22.33
 -17  18   3  -30.81   29.83
 -16  18   3   -8.33   26.56
 -15  18   3   18.78   22.33
 -14  18   3   72.43   24.06
 -13  18   3  140.41   26.94
 -12  18   3   -7.76   15.34
 -11  18   3  148.96   24.53
 -10  18   3   73.25   19.00
  -9  18   3  710.40   33.51
  -8  18   3  -14.44   10.95
  -7  18   3 1565.28   47.35
  -6  18   3   68.76   13.68
  -5  18   3  533.93   24.29
  -4  18   3    6.88    7.65
  -4  18   3   -3.37    7.36
  -3  18   3 1473.58   40.60
  -3  18   3 1469.59   45.14
  -2  18   3    9.80    8.35
  -2  18   3   11.25    7.75
  -1  18   3   53.63   10.44
   0  18   3   41.80   10.79
   0  18   3   40.83    9.62
   1  18   3  656.67   26.33
   1  18   3  659.02   25.05
   2  18   3  235.40   15.04
   2  18   3  238.24   17.25
   3  18   3  548.20   22.98
   3  18   3  580.67   27.07
   4  18   3    1.06    7.43
   4  18   3    0.97    8.68
   5  18   3 1400.18   41.40
   5  18   3 1399.97   48.34
   6  18   3  210.31   20.49
   6  18   3  187.66   16.33
   7  18   3  179.08   23.24
   7  18   3  148.38   18.27
   8  18   3   -1.74   12.86
   9  18   3  232.00   29.46
  10  18   3   11.20   16.38
  11  18   3   60.04   22.54
  12  18   3  -30.97   13.97
  13  18   3   28.16   21.35
  14  18   3   20.90   22.02
  15  18   3   75.64   28.69
 -17  19   3  157.53   46.66
 -16  19   3  -19.88   27.23
 -15  19   3   49.74   26.67
 -14  19   3   12.71   19.52
 -13  19   3  135.93   27.16
 -12  19   3   -6.69   14.66
 -11  19   3  607.18   34.42
 -10  19   3  228.78   22.51
  -9  19   3   40.77   16.53
  -8  19   3  164.42   20.84
  -7  19   3   24.30   11.70
  -6  19   3  326.99   21.05
  -5  19   3  108.92   14.96
  -4  19   3  762.36   28.31
  -4  19   3  741.87   32.69
  -3  19   3 1502.73   42.30
  -3  19   3 1621.01   48.47
  -2  19   3   14.60    8.00
  -1  19   3 1085.25   35.08
  -1  19   3 1069.64   33.70
   0  19   3   26.59   10.06
   0  19   3   23.67    8.86
   1  19   3 1480.79   43.42
   1  19   3 1497.25   40.73
   2  19   3  422.68   20.04
   2  19   3  409.88   22.44
   3  19   3  177.71   16.32
   3  19   3  157.74   13.75
   4  19   3  345.68   19.37
   4  19   3  375.31   23.97
   5  19   3   13.77   12.29
   5  19   3   12.01    9.28
   6  19   3   40.78   12.12
   6  19   3   28.08   12.73
   7  19   3  -12.62    8.64
   7  19   3   -0.61   11.04
   8  19   3  203.66   22.66
   9  19   3   81.54   21.25
  10  19   3   -9.23   14.11
  11  19   3   52.90   21.30
  12  19   3   -6.57   17.33
  13  19   3   -1.34   19.37
  14  19   3    1.05   20.37
  15  19   3   36.02   25.67
 -16  20   3   56.33   30.30
 -15  20   3   21.48   22.77
 -14  20   3  188.64   30.37
 -13  20   3   34.13   19.48
 -12  20   3  181.52   27.34
 -11  20   3   40.91   17.08
 -10  20   3  479.83   29.80
  -9  20   3  156.52   22.26
  -8  20   3   37.31   15.09
  -7  20   3  486.62   26.31
  -6  20   3  111.14   16.37
  -5  20   3  -10.85    8.29
  -4  20   3  227.71   19.36
  -4  20   3  193.87   15.41
  -3  20   3   42.43   10.77
  -2  20   3 2070.31   55.34
  -2  20   3 2050.69   51.92
  -1  20   3  195.86   15.42
  -1  20   3  166.34   13.93
   0  20   3 1501.69   41.72
   0  20   3 1383.77   41.59
   1  20   3  692.70   26.37
   1  20   3  685.37   28.44
   2  20   3  924.23   34.79
   2  20   3  936.92   31.52
   3  20   3    0.98    8.51
   3  20   3   18.22   11.48
   4  20   3  138.02   19.35
   4  20   3  138.36   14.11
   5  20   3  358.83   21.09
   5  20   3  372.03   25.62
   6  20   3  258.74   18.95
   6  20   3  247.80   22.71
   7  20   3   52.42   17.10
   8  20   3   -5.30   12.69
   9  20   3   29.81   17.53
  10  20   3   70.04   21.18
  11  20   3   21.75   19.38
  12  20   3   57.00   22.76
  13  20   3  -21.03   18.46
  14  20   3  -26.11   19.32
  15  20   3   -0.31   22.15
 -16  21   3   35.80   29.00
 -15  21   3    1.26   21.46
 -14  21   3   12.47   19.08
 -13  21   3  -22.19   15.46
 -12  21   3   56.01   20.23
 -11  21   3   10.65   16.08
 -10  21   3  861.52   39.89
  -9  21   3   -0.72   14.46
  -8  21   3  374.97   25.08
  -7  21   3   56.31   15.36
  -6  21   3 1511.01   46.74
  -5  21   3   -5.77    8.35
  -4  21   3  234.32   19.98
  -4  21   3  197.77   16.02
  -3  21   3  321.24   22.02
  -3  21   3  328.14   19.39
  -2  21   3  336.99   19.44
  -2  21   3  347.49   21.38
  -1  21   3    6.34    8.23
  -1  21   3    6.81    9.04
   0  21   3  161.79   14.53
   0  21   3  168.43   14.13
   1  21   3  187.07   16.15
   1  21   3  200.59   16.06
   2  21   3 1038.39   37.86
   2  21   3 1007.60   33.24
   3  21   3    8.82   11.37
   3  21   3   16.13   10.51
   4  21   3  212.13   16.57
   4  21   3  219.11   19.69
   5  21   3  110.99   19.49
   5  21   3  154.71   15.46
   6  21   3  674.60   35.89
   6  21   3  743.91   30.88
   7  21   3   73.79   19.64
   8  21   3  240.94   24.62
   9  21   3  -16.53   13.87
  10  21   3   -3.10   15.21
  11  21   3   -9.60   16.70
  12  21   3  139.52   30.63
  13  21   3  -15.54   19.86
  14  21   3   10.14   21.42
  15  21   3   24.47   25.61
 -15  22   3   19.75   23.17
 -14  22   3   80.11   24.54
 -13  22   3   21.89   19.92
 -12  22   3   96.89   23.67
 -11  22   3  167.35   25.51
 -10  22   3  212.93   26.06
  -9  22   3   48.03   17.12
  -8  22   3  251.46   22.00
  -7  22   3  508.04   28.37
  -6  22   3   87.91   16.72
  -5  22   3  185.24   16.55
  -4  22   3   22.57   12.45
  -4  22   3   32.79   11.27
  -3  22   3  606.39   26.09
  -3  22   3  593.58   29.70
  -2  22   3  439.58   24.29
  -2  22   3  391.73   21.39
  -1  22   3    1.60    8.21
  -1  22   3   -8.23    7.55
   0  22   3  395.17   21.92
   0  22   3  408.54   21.25
   1  22   3  569.62   27.53
   1  22   3  575.77   25.51
   2  22   3  785.63   33.27
   2  22   3  814.23   30.28
   3  22   3  105.91   17.16
   3  22   3   86.20   13.98
   4  22   3  197.43   23.72
   4  22   3  136.92   14.49
   5  22   3  623.61   28.06
   5  22   3  588.71   32.78
   6  22   3   17.41   12.33
   7  22   3   59.37   18.34
   8  22   3    2.91   13.34
   9  22   3  -11.83   14.25
  10  22   3   96.07   24.45
  11  22   3    8.82   18.92
  12  22   3   93.49   26.97
  13  22   3  -12.03   19.43
  14  22   3   34.05   24.14
  15  22   3   -5.13   22.84
 -15  23   3  124.63   31.05
 -14  23   3   -6.38   16.64
 -13  23   3  139.34   26.65
 -12  23   3   44.87   19.43
 -11  23   3  612.31   35.17
 -10  23   3   41.29   17.28
  -9  23   3   99.65   21.05
  -8  23   3  168.39   24.11
  -7  23   3   10.66   13.28
  -6  23   3   32.11   14.57
  -5  23   3   86.46   15.50
  -5  23   3   72.37   18.13
  -4  23   3    1.05   11.65
  -4  23   3    7.95   11.36
  -3  23   3  912.82   37.42
  -3  23   3  844.63   32.12
  -2  23   3   21.95   10.57
  -2  23   3   33.66   10.63
  -1  23   3  341.75   21.17
  -1  23   3  345.84   20.45
   0  23   3  120.07   16.40
   0  23   3  123.70   16.16
   1  23   3  887.84   32.52
   1  23   3  887.95   35.27
   2  23   3   44.13   11.41
   2  23   3   38.54   12.43
   3  23   3  407.84   22.00
   3  23   3  436.31   26.11
   4  23   3  -11.91    7.45
   4  23   3   -3.45   10.69
   5  23   3   83.64   17.64
   5  23   3   98.60   16.02
   6  23   3  148.89   23.14
   7  23   3   71.41   19.55
   8  23   3  104.82   23.24
   9  23   3    3.72   16.61
  10  23   3   20.75   19.87
  11  23   3   68.83   23.30
  12  23   3   19.71   21.84
  13  23   3   61.20   25.36
  14  23   3  -12.56   20.14
 -14  24   3   -6.94   16.78
 -13  24   3  219.07   30.36
 -12  24   3   26.46   18.13
 -11  24   3  298.68   26.93
 -10  24   3    2.57   13.64
  -9  24   3  344.25   26.59
  -8  24   3    8.69   13.80
  -7  24   3  463.86   27.60
  -6  24   3   78.08   17.69
  -5  24   3  176.08   17.30
  -5  24   3  209.76   21.49
  -4  24   3  -17.10    8.48
  -4  24   3   -7.68    9.99
  -3  24   3  116.77   18.50
  -3  24   3  141.36   17.55
  -2  24   3  287.46   19.49
  -2  24   3  299.84   21.08
  -1  24   3   76.96   14.04
  -1  24   3   95.58   15.58
   0  24   3   20.94   10.55
   0  24   3   18.30   10.01
   1  24   3  518.87   27.46
   1  24   3  524.86   25.39
   2  24   3  178.24   17.92
   2  24   3  158.71   14.91
   3  24   3   40.51   11.83
   3  24   3   64.27   15.97
   4  24   3   36.42   15.27
   4  24   3   22.61   11.49
   5  24   3  826.08   39.76
   6  24   3  143.74   23.91
   7  24   3  333.87   28.12
   8  24   3   83.94   21.85
   9  24   3  142.98   27.07
  10  24   3   -7.07   17.75
  11  24   3  213.36   33.45
  12  24   3   20.58   20.30
  13  24   3  -10.15   21.17
  14  24   3  -25.36   21.82
 -14  25   3   -4.35   17.56
 -13  25   3  143.72   25.58
 -12  25   3   83.89   23.09
 -11  25   3   78.69   22.03
 -10  25   3  225.26   28.28
  -9  25   3    1.61   15.57
  -8  25   3  284.00   24.07
  -7  25   3   70.49   18.40
  -6  25   3  289.74   23.18
  -5  25   3  210.15   26.02
  -5  25   3  188.44   18.10
  -4  25   3   43.56   15.56
  -4  25   3   48.39   15.03
  -3  25   3   -0.20   10.64
  -3  25   3   13.63   10.74
  -2  25   3   18.59   11.08
  -2  25   3    9.32   11.01
  -1  25   3  216.28   17.63
  -1  25   3  268.58   19.95
   0  25   3   -4.98    8.36
   0  25   3    4.27   10.10
   1  25   3  311.33   22.39
   1  25   3  337.66   21.18
   2  25   3  208.42   17.42
   2  25   3  202.64   19.27
   3  25   3  160.56   15.88
   3  25   3  186.52   18.98
   4  25   3   13.91   13.21
   4  25   3   10.89   10.73
   5  25   3  341.46   26.83
   6  25   3  115.49   23.00
   7  25   3   83.62   21.42
   8  25   3   41.67   20.77
   9  25   3    2.75   16.24
  10  25   3   34.77   21.00
  11  25   3   28.29   22.44
  12  25   3   76.25   25.47
  13  25   3   36.81   25.34
  14  25   3  -21.57   24.30
 -13  26   3   14.20   19.04
 -12  26   3   79.45   22.89
 -11  26   3   45.62   20.62
 -10  26   3   37.90   18.19
  -9  26   3   75.93   20.85
  -8  26   3  -15.28   13.27
  -7  26   3   25.91   15.25
  -6  26   3  256.67   25.75
  -6  26   3  266.75   22.73
  -5  26   3  218.44   27.27
  -5  26   3  208.69   24.18
  -4  26   3   25.71   13.99
  -4  26   3   30.47   12.87
  -3  26   3    2.89   10.48
  -3  26   3   -7.67    9.60
  -2  26   3  154.22   21.25
  -2  26   3  126.48   18.26
  -1  26   3    5.23    9.81
  -1  26   3   24.17   11.28
   0  26   3  216.31   18.42
   0  26   3  195.57   17.33
   1  26   3   51.65   13.33
   1  26   3   64.56   15.10
   2  26   3  678.16   29.50
   2  26   3  710.29   34.11
   3  26   3   40.85   12.67
   3  26   3   38.47   14.57
   4  26   3  138.58   21.54
   5  26   3   11.46   13.10
   6  26   3   62.63   18.46
   7  26   3   16.63   17.04
   8  26   3   31.51   17.92
   9  26   3   46.98   20.97
  10  26   3   11.77   20.07
  11  26   3   -6.30   19.58
  12  26   3  106.61   29.55
  13  26   3    7.68   24.07
  14  26   3   78.42   28.34
 -13  27   3    3.00   17.85
 -12  27   3  146.36   27.74
 -11  27   3   51.51   21.20
 -10  27   3  373.00   29.86
  -9  27   3   59.30   19.39
  -8  27   3  309.26   25.49
  -7  27   3  -19.55   13.79
  -6  27   3  310.57   28.31
  -6  27   3  307.98   23.76
  -5  27   3   -9.82   13.95
  -5  27   3   -6.63   12.37
  -4  27   3  167.90   21.86
  -4  27   3  200.88   25.20
  -3  27   3   84.85   18.72
  -3  27   3   55.21   14.73
  -2  27   3   34.76   12.49
  -2  27   3   17.76   12.16
  -1  27   3  102.36   17.28
  -1  27   3  108.26   17.83
   0  27   3   12.92   11.14
   0  27   3   24.48   10.77
   1  27   3  108.43   16.45
   1  27   3  124.34   19.06
   2  27   3   75.87   16.78
   2  27   3   73.47   14.74
   3  27   3  119.57   20.08
   3  27   3  118.96   16.78
   4  27   3  182.48   24.66
   5  27   3  115.09   22.80
   6  27   3  172.58   26.30
   7  27   3   72.24   21.30
   8  27   3  231.17   32.49
   9  27   3   61.82   23.53
  10  27   3  195.71   32.42
  11  27   3    6.99   21.34
  12  27   3   14.27   22.99
  13  27   3   25.81   26.08
 -12  28   3   15.05   20.02
 -11  28   3  141.85   26.37
 -10  28   3   12.39   18.54
  -9  28   3  233.87   28.15
  -8  28   3    5.22   15.81
  -7  28   3  169.61   28.91
  -7  28   3  150.46   24.12
  -6  28   3  113.60   20.66
  -6  28   3   95.53   23.18
  -5  28   3   -4.19   13.41
  -5  28   3   -4.56   14.32
  -4  28   3  229.75   20.21
  -4  28   3  247.72   23.30
  -3  28   3  127.98   19.97
  -3  28   3  135.81   21.44
  -2  28   3  120.71   18.49
  -2  28   3  114.58   19.29
  -1  28   3   23.96   12.43
  -1  28   3   31.24   12.18
   0  28   3  288.40   21.15
   0  28   3  273.72   21.66
   1  28   3   14.13   11.20
   1  28   3   20.27   12.87
   2  28   3   93.62   19.03
   2  28   3   93.55   16.58
   3  28   3  179.94   17.29
   3  28   3  194.27   21.70
   4  28   3  141.53   23.31
   5  28   3  230.71   28.68
   6  28   3   54.89   18.49
   7  28   3   23.21   18.15
   8  28   3   17.43   17.44
   9  28   3  114.56   26.57
  10  28   3   -3.26   18.10
  11  28   3  115.52   29.46
  12  28   3    6.40   24.67
  13  28   3  -25.70   22.42
 -12  29   3  -20.73   17.73
 -11  29   3   38.34   21.29
 -10  29   3   10.81   17.90
  -9  29   3   20.47   17.28
  -8  29   3    1.51   15.78
  -7  29   3   -2.98   16.68
  -7  29   3  -14.98   12.13
  -6  29   3   46.70   18.88
  -6  29   3   34.59   19.31
  -5  29   3  170.60   19.09
  -5  29   3  182.38   27.43
  -4  29   3  111.45   21.51
  -4  29   3   74.56   17.70
  -3  29   3  259.71   23.26
  -3  29   3  296.92   22.96
  -2  29   3    0.79   11.20
  -2  29   3   -5.64   11.28
  -1  29   3  242.12   20.84
  -1  29   3  233.52   20.18
   0  29   3   43.23   13.58
   0  29   3   57.56   15.59
   1  29   3  377.56   26.20
   1  29   3  454.73   26.13
   2  29   3   65.92   18.03
   2  29   3   72.10   14.95
   3  29   3   80.00   18.48
   4  29   3   96.65   22.36
   5  29   3  251.43   26.27
   6  29   3   -7.04   14.78
   7  29   3   -4.35   14.74
   8  29   3  -16.20   16.89
   9  29   3   57.00   23.59
  10  29   3  -34.54   15.47
  11  29   3    9.64   20.00
  12  29   3   29.00   24.59
  13  29   3   45.13   26.77
 -11  30   3  181.29   28.22
 -10  30   3   12.19   17.41
  -9  30   3  230.40   29.25
  -8  30   3  -14.26   17.44
  -8  30   3  -14.14   13.19
  -7  30   3  191.05   31.22
  -7  30   3  191.88   25.76
  -6  30   3    6.30   16.47
  -6  30   3   -4.76   14.36
  -5  30   3  503.52   30.08
  -5  30   3  452.32   33.14
  -4  30   3   28.78   15.90
  -4  30   3   27.50   16.72
  -3  30   3   27.37   13.89
  -3  30   3   39.73   15.79
  -2  30   3   17.87   13.75
  -2  30   3   -1.75   12.24
  -1  30   3   26.76   15.13
  -1  30   3   52.88   15.73
   0  30   3  162.12   22.61
   0  30   3  159.64   21.58
   1  30   3   27.73   12.90
   1  30   3   55.71   16.28
   2  30   3   -6.08   13.12
   2  30   3  -10.51   10.04
   3  30   3  194.38   26.19
   4  30   3  106.74   21.83
   5  30   3  218.85   24.72
   6  30   3   -4.06   16.39
   7  30   3   96.55   24.93
   8  30   3    3.01   17.21
   9  30   3   90.60   26.54
  10  30   3    3.06   21.20
  11  30   3    9.29   22.29
  12  30   3   36.33   24.65
  13  30   3   32.13   27.08
 -10  31   3  223.15   25.35
  -9  31   3  130.86   25.48
  -9  31   3  130.52   27.68
  -8  31   3    9.30   19.26
  -8  31   3   31.61   18.96
  -7  31   3    8.62   17.90
  -7  31   3   15.79   16.78
  -6  31   3  212.70   30.61
  -6  31   3  212.67   27.23
  -5  31   3  143.06   22.11
  -5  31   3  120.56   24.51
  -4  31   3  127.38   21.12
  -4  31   3   96.48   21.69
  -3  31   3  164.45   23.11
  -3  31   3  200.43   26.48
  -2  31   3   -9.78   10.75
  -2  31   3   -0.55   12.51
  -1  31   3  227.26   21.68
  -1  31   3  247.47   22.22
   0  31   3   42.61   14.50
   1  31   3   82.55   17.77
   1  31   3   99.54   19.66
   2  31   3   61.56   18.93
   3  31   3   98.36   21.22
   4  31   3  232.42   24.81
   5  31   3   17.34   17.49
   6  31   3   25.17   17.97
   7  31   3   28.26   19.72
   8  31   3  105.18   27.08
   9  31   3  -20.45   19.15
  10  31   3   48.74   25.26
  11  31   3  -13.25   18.37
  12  31   3    6.80   24.13
 -10  32   3    6.21   17.88
  -9  32   3   46.12   20.21
  -9  32   3   40.49   23.47
  -8  32   3   58.59   21.72
  -8  32   3   43.16   22.29
  -7  32   3   13.43   19.88
  -7  32   3   -1.46   15.10
  -6  32   3   52.22   21.32
  -6  32   3   75.09   19.33
  -5  32   3   60.66   20.86
  -5  32   3   86.11   20.93
  -4  32   3  247.25   25.33
  -4  32   3  243.55   22.69
  -3  32   3    2.63   14.69
  -3  32   3  -10.49   13.06
  -2  32   3  248.38   23.08
  -2  32   3  212.40   21.65
  -1  32   3   45.59   15.72
  -1  32   3   44.78   17.62
   0  32   3  703.12   36.60
   0  32   3  647.95   32.83
   1  32   3   -7.71   12.73
   1  32   3   -4.69   10.89
   2  32   3  168.86   26.86
   3  32   3    6.74   16.01
   4  32   3   21.54   16.90
   5  32   3  -24.46   14.63
   6  32   3  -15.55   14.83
   7  32   3   66.48   23.20
   8  32   3   41.68   22.79
   9  32   3  -27.97   15.57
  10  32   3   -6.67   18.95
  11  32   3  -19.75   20.56
  12  32   3    7.39   26.15
 -10  33   3   23.84   23.44
  -9  33   3   16.12   20.25
  -9  33   3   30.02   18.76
  -8  33   3  225.00   35.08
  -8  33   3  245.30   26.45
  -7  33   3   -9.65   15.80
  -7  33   3   11.56   18.92
  -6  33   3  225.28   24.03
  -6  33   3  260.22   34.69
  -5  33   3   98.26   24.02
  -5  33   3  113.22   21.64
  -4  33   3  191.84   21.10
  -4  33   3  131.21   24.59
  -3  33   3  -10.61   13.35
  -3  33   3  -16.31   12.33
  -2  33   3  230.81   27.29
  -2  33   3  225.75   22.91
  -1  33   3  220.78   25.92
  -1  33   3  223.76   27.64
   0  33   3  160.65   22.03
   0  33   3  123.38   23.20
   1  33   3  125.07   23.33
   2  33   3   22.74   16.80
   3  33   3  114.44   24.63
   4  33   3   75.01   22.12
   5  33   3   15.77   18.10
   6  33   3  118.62   26.70
   7  33   3   -6.96   17.78
   8  33   3   36.98   22.30
   9  33   3   -7.68   18.92
  10  33   3   28.28   24.07
  11  33   3  -23.94   18.33
 -12  34   3   91.83   36.63
 -11  34   3   44.07   27.85
 -10  34   3   12.60   22.47
  -9  34   3  112.16   29.01
  -8  34   3   28.67   19.51
  -8  34   3   59.11   24.50
  -7  34   3  194.19   28.81
  -7  34   3  197.86   33.13
  -6  34   3    3.05   15.79
  -6  34   3    0.28   18.15
  -5  34   3  234.55   23.79
  -5  34   3  227.76   31.67
  -4  34   3  256.29   29.54
  -4  34   3  215.37   29.93
  -3  34   3   81.18   20.18
  -3  34   3   72.02   22.30
  -2  34   3   32.34   17.99
  -2  34   3   47.95   17.46
  -1  34   3   59.68   19.89
  -1  34   3   19.53   15.76
   0  34   3   17.74   15.62
   0  34   3   21.19   13.91
   1  34   3   34.28   18.48
   2  34   3  186.61   28.16
   3  34   3  187.63   28.04
   4  34   3   23.10   17.91
   5  34   3  104.93   25.23
   6  34   3   17.18   20.37
   7  34   3   25.15   22.30
   8  34   3  -15.40   19.96
   9  34   3   38.02   25.18
  10  34   3   -8.99   19.23
  11  34   3   21.09   23.43
 -12  35   3   78.92   34.23
 -11  35   3   22.75   26.53
 -10  35   3   17.49   23.04
  -9  35   3   15.48   22.21
  -8  35   3  -12.25   16.85
  -8  35   3   13.35   20.78
  -7  35   3   61.56   25.17
  -7  35   3    3.32   16.74
  -6  35   3    8.63   18.13
  -6  35   3   22.83   20.63
  -5  35   3   49.68   20.62
  -5  35   3  116.44   24.29
  -4  35   3   23.64   17.97
  -4  35   3    0.08   16.67
  -3  35   3  172.76   26.30
  -3  35   3  273.70   32.93
  -2  35   3   47.36   19.84
  -2  35   3   63.58   21.75
  -1  35   3  304.08   26.12
  -1  35   3  339.05   28.14
   0  35   3  -22.87   14.46
   1  35   3   48.20   21.29
   2  35   3   82.43   22.40
   3  35   3  265.45   32.34
   4  35   3   26.87   20.25
   5  35   3  -13.83   16.31
   6  35   3    7.37   20.79
   7  35   3    1.28   20.20
   8  35   3  -21.87   19.08
   9  35   3  -25.35   20.40
  10  35   3   48.17   28.25
  11  35   3    5.83   25.04
 -11  36   3   52.52   28.64
 -10  36   3   12.02   23.89
  -9  36   3  104.89   31.12
  -8  36   3  -15.35   18.85
  -7  36   3   48.51   24.24
  -7  36   3   32.95   20.48
  -6  36   3   12.25   18.29
  -6  36   3   10.64   17.07
  -5  36   3   48.98   21.58
  -5  36   3  120.03   24.70
  -4  36   3    5.49   16.45
  -4  36   3   29.02   21.02
  -3  36   3    7.00   17.12
  -3  36   3    1.74   16.29
  -2  36   3   86.90   22.66
  -2  36   3  102.15   23.57
  -1  36   3  134.00   25.27
  -1  36   3  135.44   23.21
   0  36   3  121.95   26.36
   1  36   3  -13.29   16.17
   2  36   3   13.11   19.14
   3  36   3   28.01   18.87
   4  36   3  -30.97   17.30
   5  36   3  -30.58   15.45
   6  36   3   -0.43   20.42
   7  36   3  281.89   38.85
   8  36   3   23.17   23.33
   9  36   3   29.68   27.25
  10  36   3   -4.10   22.63
 -11  37   3    5.06   25.46
 -10  37   3   -7.72   21.19
  -9  37   3   15.34   22.86
  -8  37   3   81.04   28.00
  -7  37   3   14.98   21.12
  -6  37   3   50.44   20.76
  -6  37   3   21.15   20.60
  -5  37   3   -6.17   17.34
  -5  37   3   10.32   17.25
  -4  37   3   -3.69   17.07
  -4  37   3   -5.53   16.14
  -3  37   3    1.46   17.50
  -3  37   3   -0.07   16.95
  -2  37   3  162.92   26.59
  -2  37   3  137.49   26.65
  -1  37   3   11.46   16.74
   0  37   3   21.64   17.56
   1  37   3   -5.98   17.32
   2  37   3   28.07   19.61
   3  37   3  170.93   28.85
   4  37   3   -2.44   16.46
   5  37   3    7.01   20.37
   6  37   3  133.34   30.67
   7  37   3    4.58   22.07
   8  37   3   14.79   22.22
   9  37   3  -12.08   24.67
 -10  38   3  -36.08   19.56
  -9  38   3   -9.33   22.39
  -8  38   3   75.30   27.22
  -7  38   3  -17.57   19.07
  -6  38   3   -6.82   17.64
  -6  38   3  -32.04   17.79
  -5  38   3  -29.45   16.30
  -5  38   3   -2.72   16.95
  -4  38   3  108.36   25.42
  -4  38   3  107.41   23.73
  -3  38   3  -28.71   14.57
  -3  38   3  -16.36   14.53
  -2  38   3    3.08   16.71
  -2  38   3   25.65   17.67
  -1  38   3    2.06   17.17
   0  38   3  -19.74   13.67
   1  38   3   -8.13   16.72
   2  38   3  201.80   30.48
   3  38   3   26.20   21.00
   4  38   3   28.70   22.19
   5  38   3    1.02   21.71
   6  38   3   94.80   28.66
   7  38   3    0.94   22.63
   8  38   3   -0.93   20.80
   9  38   3   -3.31   23.79
  -9  39   3   -4.71   23.17
  -8  39   3   16.87   23.54
  -7  39   3   -8.93   19.89
  -6  39   3  -14.27   18.78
  -5  39   3  -27.59   16.24
  -5  39   3    1.57   18.17
  -4  39   3    3.24   17.67
  -4  39   3    6.13   17.18
  -3  39   3    9.60   17.30
  -3  39   3   -3.46   16.03
  -2  39   3   50.88   21.49
  -1  39   3   14.23   17.95
   0  39   3   -5.25   15.62
   1  39   3  -40.17   15.90
   2  39   3   32.35   20.10
   3  39   3   73.12   24.24
   4  39   3   -5.99   19.03
   5  39   3   14.24   21.80
   6  39   3   68.02   27.67
   7  39   3   -6.84   21.60
   8  39   3   48.18   28.90
  -9  40   3    4.73   23.80
  -8  40   3   -8.30   22.21
  -7  40   3   60.78   25.70
  -6  40   3   -7.97   19.83
  -5  40   3   -5.41   18.63
  -4  40   3   -9.65   16.64
  -4  40   3   12.88   17.89
  -3  40   3   -5.19   16.51
  -2  40   3   23.55   19.22
  -1  40   3   50.11   21.88
   0  40   3   36.32   19.96
   1  40   3   13.94   19.01
   2  40   3   17.66   19.57
   3  40   3  -10.35   17.27
   4  40   3    4.18   19.75
   5  40   3    7.00   21.63
   6  40   3   43.43   25.92
   7  40   3  121.15   32.24
   8  40   3   16.68   26.00
  -8  41   3  -20.59   21.62
  -7  41   3   -6.27   20.38
  -6  41   3  -27.44   19.23
  -5  41   3   -2.86   19.67
  -4  41   3    3.57   18.54
  -3  41   3   35.31   20.48
  -2  41   3  -25.12   16.01
  -1  41   3  132.84   29.05
   0  41   3   -5.13   18.49
   1  41   3   35.90   22.86
   2  41   3   -1.01   19.43
   3  41   3   82.59   26.92
   4  41   3   33.70   23.64
   5  41   3   40.79   26.14
   6  41   3   -9.20   21.52
   7  41   3   43.18   27.34
  -7  42   3  -41.29   19.58
  -6  42   3    8.33   21.55
  -5  42   3   89.46   26.72
  -3  42   3   18.29   20.48
  -2  42   3    0.26   19.10
  -1  42   3   12.13   20.54
   0  42   3    9.80   19.09
   1  42   3   10.94   21.53
   2  42   3   50.37   23.86
   3  42   3   36.44   22.64
   4  42   3    5.43   21.34
   5  42   3   31.63   23.42
   6  42   3   -8.64   23.43
  -6  43   3    5.40   21.06
  -1  43   3  141.34   28.20
   0  43   3   41.69   22.78
   1  43   3   28.19   22.03
   2  43   3    6.33   21.71
   3  43   3   53.99   26.39
   4  43   3    2.52   21.67
   5  43   3   51.12   27.61
  -1  44   3   -4.58   19.95
   0  44   3  168.89   33.18
   1  44   3   17.02   23.06
   2  44   3   20.39   23.41
   3  44   3    0.72   22.00
   4  44   3   47.83   28.41
   1  45   3    6.82   22.41
   2  45   3   -1.18   23.53
   2  45  -4    3.14   23.08
   1  45  -4   83.25   28.77
   0  45  -4   29.80   24.43
   5  44  -4   50.55   28.37
   4  44  -4   -4.83   21.48
   3  44  -4    7.88   23.28
   2  44  -4   -6.99   21.96
   1  44  -4   -0.87   22.09
   0  44  -4   59.37   25.11
  -1  44  -4    3.12   22.54
  -2  44  -4    8.74   22.72
  -3  44  -4   54.90   26.22
   6  43  -4   31.78   23.54
   5  43  -4   -7.66   23.38
   4  43  -4   74.78   29.06
   3  43  -4  -11.51   20.14
   2  43  -4   -3.64   20.53
[truncated: 1,368,397 more chars]
