# Supplementary material
Source: MDPI journal article supplement (https://www.mdpi.com/2073-4352/8/5/229)
Supplement: s1 [file s1 › 3.cif]

 
data_170616g
 
_audit_creation_method            'SHELXL-2014/7'
_shelx_SHELXL_version_number      '2014/7'
_chemical_name_systematic         ?
_chemical_name_common             ?
_chemical_melting_point           ?
_chemical_formula_moiety          ?
_chemical_formula_sum
 'C98.50 H79.50 Fe4 N12.50 O20 Tb' 
_chemical_formula_weight          2140.56

loop_
 _atom_type_symbol
 _atom_type_description
 _atom_type_scat_dispersion_real
 _atom_type_scat_dispersion_imag
 _atom_type_scat_source
 'C'  'C'   0.0033   0.0016
 'International Tables Vol C Tables 4.2.6.8 and 6.1.1.4'
 'H'  'H'   0.0000   0.0000
 'International Tables Vol C Tables 4.2.6.8 and 6.1.1.4'
 'N'  'N'   0.0061   0.0033
 'International Tables Vol C Tables 4.2.6.8 and 6.1.1.4'
 'O'  'O'   0.0106   0.0060
 'International Tables Vol C Tables 4.2.6.8 and 6.1.1.4'
 'Fe'  'Fe'   0.3463   0.8444
 'International Tables Vol C Tables 4.2.6.8 and 6.1.1.4'
 'Tb'  'Tb'  -0.1723   4.1537
 'International Tables Vol C Tables 4.2.6.8 and 6.1.1.4'
 
_space_group_crystal_system       monoclinic
_space_group_IT_number            14
_space_group_name_H-M_alt         'P 21/n'
_space_group_name_Hall            '-P 2yn'
 
_shelx_space_group_comment
;
The symmetry employed for this shelxl refinement is uniquely defined
by the following loop, which should always be used as a source of
symmetry information in preference to the above space-group names.
They are only intended as comments.
;
 
loop_
 _space_group_symop_operation_xyz
 'x, y, z'
 '-x+1/2, y+1/2, -z+1/2'
 '-x, -y, -z'
 'x-1/2, -y-1/2, z-1/2'
 
_cell_length_a                    14.2903(13)
_cell_length_b                    34.258(3)
_cell_length_c                    19.4615(16)
_cell_angle_alpha                 90
_cell_angle_beta                  106.756(3)
_cell_angle_gamma                 90
_cell_volume                      9123.1(14)
_cell_formula_units_Z             4
_cell_measurement_temperature     298(2)
_cell_measurement_reflns_used     10066 
_cell_measurement_theta_min       2.323 
_cell_measurement_theta_max       23.7505 
 
_exptl_crystal_description        acicular 
_exptl_crystal_colour             dark 
_exptl_crystal_density_meas       ?
_exptl_crystal_density_method     ?
_exptl_crystal_density_diffrn     1.558          
_exptl_crystal_F_000              4348
_exptl_transmission_factor_min    ?
_exptl_transmission_factor_max    ?
_exptl_crystal_size_max           0.480
_exptl_crystal_size_mid           0.300
_exptl_crystal_size_min           0.270
_exptl_absorpt_coefficient_mu     1.466
_shelx_estimated_absorpt_T_min    0.540
_shelx_estimated_absorpt_T_max    0.693
_exptl_absorpt_correction_type    multi-scan 
_exptl_absorpt_correction_T_min   0.5396 
_exptl_absorpt_correction_T_max   0.6930 
_exptl_absorpt_process_details    sadabs 
_exptl_absorpt_special_details    ?
_diffrn_ambient_temperature       298(2)
_diffrn_radiation_wavelength      0.71073
_diffrn_radiation_type            MoK\a
_diffrn_source                    ?
_diffrn_radiation_monochromator   graphite 
_diffrn_measurement_device_type   'CCD area detector' 
_diffrn_measurement_method        'phi and omega scans' 
_diffrn_detector_area_resol_mean  ?
_diffrn_reflns_number             45509
_diffrn_reflns_av_unetI/netI      0.0854
_diffrn_reflns_av_R_equivalents   0.0675
_diffrn_reflns_limit_h_min        -16
_diffrn_reflns_limit_h_max        17
_diffrn_reflns_limit_k_min        -33
_diffrn_reflns_limit_k_max        40
_diffrn_reflns_limit_l_min        -18
_diffrn_reflns_limit_l_max        23
_diffrn_reflns_theta_min          2.323
_diffrn_reflns_theta_max          25.019
_diffrn_reflns_theta_full         25.019
_diffrn_measured_fraction_theta_max   0.998
_diffrn_measured_fraction_theta_full  0.998
_diffrn_reflns_Laue_measured_fraction_max    0.998
_diffrn_reflns_Laue_measured_fraction_full   0.998
_diffrn_reflns_point_group_measured_fraction_max   0.998
_diffrn_reflns_point_group_measured_fraction_full  0.998
_reflns_number_total              16064
_reflns_number_gt                 10686
_reflns_threshold_expression      'I > 2\s(I)'
_reflns_Friedel_coverage          0.000
_reflns_Friedel_fraction_max      .
_reflns_Friedel_fraction_full     .
 
_reflns_special_details
;
 Reflections were merged by SHELXL according to the crystal
 class for the calculation of statistics and refinement.
 
 _reflns_Friedel_fraction is defined as the number of unique
 Friedel pairs measured divided by the number that would be
 possible theoretically, ignoring centric projections and
 systematic absences.
;
 
_computing_data_collection        'Bruker SMART' 
_computing_cell_refinement        'Bruker SMART' 
_computing_data_reduction         'Bruker SHELXTL'
_computing_structure_solution     'SHELXL-2014/7 (Sheldrick, 2014)'
_computing_structure_refinement 'SHELXL-2014/7 (Sheldrick, 2014)'
_computing_molecular_graphics     'Bruker SHELXTL' 
_computing_publication_material   'Bruker SHELXTL'
_refine_special_details           ?
_refine_ls_structure_factor_coef  Fsqd
_refine_ls_matrix_type            full
_refine_ls_weighting_scheme       calc
_refine_ls_weighting_details
'w=1/[\s^2^(Fo^2^)+(0.0290P)^2^+73.5895P] where P=(Fo^2^+2Fc^2^)/3'
_atom_sites_solution_primary      ?
_atom_sites_solution_secondary    ?
_atom_sites_solution_hydrogens    geom
_refine_ls_hydrogen_treatment     constr
_refine_ls_extinction_method      none
_refine_ls_extinction_coef        .
_refine_ls_number_reflns          16064
_refine_ls_number_parameters      1225
_refine_ls_number_restraints      4045
_refine_ls_R_factor_all           0.1146
_refine_ls_R_factor_gt            0.0668
_refine_ls_wR_factor_ref          0.1525
_refine_ls_wR_factor_gt           0.1328
_refine_ls_goodness_of_fit_ref    1.043
_refine_ls_restrained_S_all       6.567
_refine_ls_shift/su_max           0.003
_refine_ls_shift/su_mean          0.000
 
loop_
 _atom_site_label
 _atom_site_type_symbol
 _atom_site_fract_x
 _atom_site_fract_y
 _atom_site_fract_z
 _atom_site_U_iso_or_equiv
 _atom_site_adp_type
 _atom_site_occupancy
 _atom_site_site_symmetry_order  
 _atom_site_calc_flag
 _atom_site_refinement_flags_posn
 _atom_site_refinement_flags_adp
 _atom_site_refinement_flags_occupancy
 _atom_site_disorder_assembly
 _atom_site_disorder_group
N9 N 0.9259(6) 0.7419(3) 0.6287(5) 0.063(2) Uani 1 1 d D U . . .
N11 N 0.0666(6) 0.7731(3) 0.5694(4) 0.067(2) Uani 1 1 d D U . . .
H22 H 0.0276 0.7629 0.5909 0.080 Uiso 1 1 calc R U . . .
N12 N 0.8894(15) 0.4766(8) 0.6451(11) 0.321(7) Uani 1 1 d D U . . .
N22 N 0.5552(13) 0.3730(5) 0.7545(11) 0.170(4) Uani 1 1 d . U . . .
Tb1 Tb 0.46993(3) 0.66566(2) 0.75046(2) 0.02860(11) Uani 1 1 d . U . . .
Fe1 Fe 0.43329(8) 0.58775(3) 0.88164(6) 0.0317(3) Uani 1 1 d . U . . .
Fe2 Fe 0.68769(8) 0.59846(3) 0.77401(6) 0.0317(3) Uani 1 1 d . U . . .
Fe3 Fe 0.20039(8) 0.63910(3) 0.67324(6) 0.0315(3) Uani 1 1 d . U . . .
Fe4 Fe 0.45388(8) 0.64357(3) 0.55569(6) 0.0339(3) Uani 1 1 d . U . . .
N1 N 0.5746(5) 0.62491(18) 0.6346(3) 0.0327(13) Uani 1 1 d . U . . .
N2 N 0.6132(4) 0.59949(19) 0.8488(3) 0.0331(14) Uani 1 1 d . U . . .
N3 N 0.3262(5) 0.59508(19) 0.7865(3) 0.0336(13) Uani 1 1 d . U . . .
N4 N 0.2813(4) 0.64738(19) 0.6024(3) 0.0340(14) Uani 1 1 d . U . . .
N5 N 0.1036(5) 0.6307(2) 0.7422(4) 0.0383(15) Uani 1 1 d . U . . .
N6 N 0.3628(5) 0.5657(2) 0.9591(4) 0.0435(16) Uani 1 1 d . U . . .
N7 N 0.6227(6) 0.5397(2) 0.7424(4) 0.0511(17) Uani 1 1 d . U . . .
N8 N 0.4074(6) 0.5800(2) 0.5345(4) 0.0529(17) Uani 1 1 d . U . . .
N13 N 0.0383(12) 0.5349(5) 0.5396(9) 0.152(4) Uani 0.5 1 d . U P A 1
O1 O 0.5261(4) 0.63875(17) 0.4882(3) 0.0445(13) Uani 1 1 d . U . . .
O2 O 0.7243(4) 0.59748(16) 0.6831(3) 0.0411(13) Uani 1 1 d . U . . .
O3 O 0.5696(4) 0.62289(15) 0.7051(3) 0.0344(12) Uani 1 1 d . U . . .
O4 O 0.7923(4) 0.57265(17) 0.8429(3) 0.0416(13) Uani 1 1 d . U . . .
O5 O 0.5140(4) 0.60971(15) 0.8239(3) 0.0336(11) Uani 1 1 d . U . . .
O6 O 0.5695(4) 0.58170(16) 0.9473(3) 0.0381(13) Uani 1 1 d . U . . .
O7 O 0.4293(4) 0.53304(16) 0.8536(3) 0.0425(13) Uani 1 1 d . U . . .
O8 O 0.3198(4) 0.63289(14) 0.7573(3) 0.0313(11) Uani 1 1 d . U . . .
O9 O 0.2142(4) 0.58059(16) 0.6807(3) 0.0420(13) Uani 1 1 d . U . . .
O10 O 0.4775(4) 0.70211(17) 0.5608(3) 0.0444(13) Uani 1 1 d . U . . .
O11 O 0.5245(4) 0.71011(16) 0.6793(3) 0.0429(13) Uani 1 1 d . U . . .
O12 O 0.1932(4) 0.69559(16) 0.6991(3) 0.0393(13) Uani 1 1 d . U . . .
O13 O 0.3474(4) 0.71393(16) 0.7182(3) 0.0421(13) Uani 1 1 d . U . . .
O14 O 0.4474(4) 0.68703(16) 0.8600(3) 0.0377(12) Uani 1 1 d . U . . .
O15 O 0.3929(4) 0.63970(16) 0.9167(3) 0.0398(13) Uani 1 1 d . U . . .
O16 O 0.6290(4) 0.68664(16) 0.8173(3) 0.0374(12) Uani 1 1 d . U . . .
O17 O 0.7521(4) 0.65065(16) 0.8026(3) 0.0400(13) Uani 1 1 d . U . . .
O18 O 0.0875(4) 0.63968(18) 0.5921(3) 0.0486(14) Uani 1 1 d . U . . .
O19 O 0.3168(4) 0.65234(17) 0.4963(3) 0.0441(13) Uani 1 1 d . U . . .
O20 O 0.3839(4) 0.64511(15) 0.6309(3) 0.0334(11) Uani 1 1 d . U . . .
C1 C 0.6106(6) 0.6222(2) 0.4921(5) 0.0398(17) Uani 1 1 d . U . . .
C2 C 0.6376(7) 0.6174(3) 0.4288(5) 0.053(2) Uani 1 1 d . U . . .
H2 H 0.5965 0.6269 0.3859 0.063 Uiso 1 1 calc R U . . .
C3 C 0.7223(7) 0.5993(3) 0.4285(5) 0.059(2) Uani 1 1 d . U . . .
H3 H 0.7375 0.5963 0.3854 0.071 Uiso 1 1 calc R U . . .
C4 C 0.7849(7) 0.5858(3) 0.4903(5) 0.052(2) Uani 1 1 d . U . . .
H4 H 0.8433 0.5739 0.4899 0.062 Uiso 1 1 calc R U . . .
C5 C 0.7611(6) 0.5897(2) 0.5529(5) 0.0428(18) Uani 1 1 d . U . . .
H5 H 0.8036 0.5800 0.5950 0.051 Uiso 1 1 calc R U . . .
C6 C 0.6746(6) 0.6079(2) 0.5558(4) 0.0385(17) Uani 1 1 d . U . . .
C7 C 0.6573(6) 0.6102(2) 0.6274(4) 0.0321(15) Uani 1 1 d . U . . .
C8 C 0.8072(6) 0.5661(2) 0.9129(4) 0.0390(18) Uani 1 1 d . U . . .
C9 C 0.8979(6) 0.5515(3) 0.9525(5) 0.046(2) Uani 1 1 d . U . . .
H9 H 0.9453 0.5474 0.9291 0.055 Uiso 1 1 calc R U . . .
C10 C 0.9202(7) 0.5430(3) 1.0229(5) 0.057(2) Uani 1 1 d . U . . .
H10 H 0.9816 0.5333 1.0470 0.069 Uiso 1 1 calc R U . . .
C11 C 0.8515(7) 0.5489(3) 1.0595(5) 0.057(2) Uani 1 1 d . U . . .
H11 H 0.8663 0.5435 1.1083 0.068 Uiso 1 1 calc R U . . .
C12 C 0.7605(6) 0.5630(3) 1.0222(5) 0.047(2) Uani 1 1 d . U . . .
H12 H 0.7141 0.5668 1.0467 0.056 Uiso 1 1 calc R U . . .
C13 C 0.7357(6) 0.5717(2) 0.9490(4) 0.0358(17) Uani 1 1 d . U . . .
C14 C 0.6353(6) 0.5852(2) 0.9133(4) 0.0338(16) Uani 1 1 d . U . . .
C15 C 0.3543(7) 0.5125(2) 0.8172(5) 0.0428(18) Uani 1 1 d . U . . .
C16 C 0.3516(7) 0.4718(3) 0.8289(5) 0.052(2) Uani 1 1 d . U . . .
H16 H 0.4019 0.4603 0.8644 0.062 Uiso 1 1 calc R U . . .
C17 C 0.2782(8) 0.4494(3) 0.7900(6) 0.062(2) Uani 1 1 d . U . . .
H17 H 0.2795 0.4228 0.7995 0.074 Uiso 1 1 calc R U . . .
C18 C 0.2009(8) 0.4645(3) 0.7364(6) 0.067(3) Uani 1 1 d . U . . .
H18 H 0.1504 0.4487 0.7102 0.080 Uiso 1 1 calc R U . . .
C19 C 0.2019(7) 0.5038(3) 0.7237(5) 0.058(2) Uani 1 1 d . U . . .
H19 H 0.1511 0.5145 0.6874 0.070 Uiso 1 1 calc R U . . .
C20 C 0.2758(6) 0.5285(2) 0.7626(4) 0.0412(18) Uani 1 1 d . U . . .
C21 C 0.2707(6) 0.5701(2) 0.7412(4) 0.0313(16) Uani 1 1 d . U . . .
C22 C 0.0725(6) 0.6461(3) 0.5232(4) 0.0436(19) Uani 1 1 d . U . . .
C23 C -0.0231(7) 0.6472(3) 0.4793(5) 0.062(2) Uani 1 1 d . U . . .
H23 H -0.0740 0.6429 0.4993 0.074 Uiso 1 1 calc R U . . .
C24 C -0.0445(8) 0.6546(4) 0.4076(6) 0.080(3) Uani 1 1 d . U . . .
H24 H -0.1091 0.6550 0.3792 0.096 Uiso 1 1 calc R U . . .
C25 C 0.0298(8) 0.6616(4) 0.3772(6) 0.085(3) Uani 1 1 d . U . . .
H25 H 0.0157 0.6676 0.3287 0.102 Uiso 1 1 calc R U . . .
C26 C 0.1252(7) 0.6597(3) 0.4195(5) 0.067(2) Uani 1 1 d . U . . .
H26 H 0.1750 0.6638 0.3984 0.081 Uiso 1 1 calc R U . . .
C27 C 0.1499(6) 0.6518(3) 0.4929(4) 0.0471(19) Uani 1 1 d . U . . .
C28 C 0.2544(6) 0.6502(3) 0.5320(4) 0.0393(17) Uani 1 1 d . U . . .
C29 C 0.4988(6) 0.7235(3) 0.6174(5) 0.0403(17) Uani 1 1 d . U . . .
C30 C 0.4952(7) 0.7668(3) 0.6065(5) 0.046(2) Uani 1 1 d . U . . .
C31 C 0.4638(8) 0.7825(3) 0.5387(6) 0.062(2) Uani 1 1 d . U . . .
H31 H 0.4482 0.7661 0.4990 0.075 Uiso 1 1 calc R U . . .
C32 C 0.4552(9) 0.8227(3) 0.5292(7) 0.079(3) Uani 1 1 d . U . . .
H32 H 0.4334 0.8333 0.4833 0.095 Uiso 1 1 calc R U . . .
C33 C 0.4788(9) 0.8463(3) 0.5873(7) 0.085(3) Uani 1 1 d . U . . .
H33 H 0.4724 0.8732 0.5814 0.102 Uiso 1 1 calc R U . . .
C34 C 0.5123(9) 0.8308(3) 0.6551(7) 0.082(3) Uani 1 1 d . U . . .
H34 H 0.5291 0.8473 0.6947 0.098 Uiso 1 1 calc R U . . .
C35 C 0.5210(8) 0.7910(3) 0.6649(6) 0.062(2) Uani 1 1 d . U . . .
H35 H 0.5444 0.7807 0.7109 0.074 Uiso 1 1 calc R U . . .
C36 C 0.2609(6) 0.7216(2) 0.7160(4) 0.0358(17) Uani 1 1 d . U . . .
C37 C 0.2331(6) 0.7616(2) 0.7293(4) 0.0411(18) Uani 1 1 d . U . . .
C38 C 0.2891(7) 0.7926(3) 0.7226(5) 0.048(2) Uani 1 1 d . U . . .
H38 H 0.3462 0.7884 0.7099 0.058 Uiso 1 1 calc R U . . .
C39 C 0.2633(7) 0.8301(3) 0.7344(5) 0.060(2) Uani 1 1 d . U . . .
H39 H 0.3017 0.8511 0.7290 0.072 Uiso 1 1 calc R U . . .
C40 C 0.1785(8) 0.8360(3) 0.7543(5) 0.063(2) Uani 1 1 d . U . . .
H40 H 0.1593 0.8612 0.7620 0.076 Uiso 1 1 calc R U . . .
C41 C 0.1239(8) 0.8051(3) 0.7627(5) 0.058(2) Uani 1 1 d . U . . .
H41 H 0.0682 0.8091 0.7774 0.070 Uiso 1 1 calc R U . . .
C42 C 0.1498(7) 0.7677(3) 0.7497(5) 0.049(2) Uani 1 1 d . U . . .
H42 H 0.1111 0.7467 0.7546 0.059 Uiso 1 1 calc R U . . .
C43 C 0.3986(6) 0.6748(2) 0.8988(4) 0.0374(17) Uani 1 1 d . U . . .
C44 C 0.3396(6) 0.7037(3) 0.9275(4) 0.0369(18) Uani 1 1 d . U . . .
C45 C 0.3439(7) 0.7428(3) 0.9133(5) 0.051(2) Uani 1 1 d . U . . .
H45 H 0.3869 0.7518 0.8889 0.061 Uiso 1 1 calc R U . . .
C46 C 0.2834(8) 0.7693(3) 0.9354(5) 0.062(2) Uani 1 1 d . U . . .
H46 H 0.2880 0.7959 0.9273 0.074 Uiso 1 1 calc R U . . .
C47 C 0.2186(8) 0.7560(4) 0.9686(6) 0.070(3) Uani 1 1 d . U . . .
H47 H 0.1769 0.7736 0.9816 0.084 Uiso 1 1 calc R U . . .
C48 C 0.2134(7) 0.7177(3) 0.9831(5) 0.065(2) Uani 1 1 d . U . . .
H48 H 0.1688 0.7091 1.0064 0.077 Uiso 1 1 calc R U . . .
C49 C 0.2750(6) 0.6907(3) 0.9634(5) 0.049(2) Uani 1 1 d . U . . .
H49 H 0.2723 0.6644 0.9744 0.058 Uiso 1 1 calc R U . . .
C50 C 0.7177(6) 0.6829(2) 0.8180(4) 0.0340(16) Uani 1 1 d . U . . .
C51 C 0.7854(6) 0.7162(3) 0.8355(5) 0.0417(18) Uani 1 1 d . U . . .
C52 C 0.7567(7) 0.7516(3) 0.8544(5) 0.051(2) Uani 1 1 d . U . . .
H52 H 0.6924 0.7554 0.8548 0.062 Uiso 1 1 calc R U . . .
C53 C 0.8240(7) 0.7819(3) 0.8730(5) 0.059(2) Uani 1 1 d . U . . .
H53 H 0.8051 0.8059 0.8869 0.071 Uiso 1 1 calc R U . . .
C54 C 0.9182(8) 0.7764(3) 0.8708(6) 0.064(3) Uani 1 1 d . U . . .
H54 H 0.9627 0.7969 0.8825 0.077 Uiso 1 1 calc R U . . .
C55 C 0.9467(7) 0.7411(3) 0.8516(5) 0.055(2) Uani 1 1 d . U . . .
H55 H 1.0104 0.7374 0.8498 0.066 Uiso 1 1 calc R U . . .
C56 C 0.8808(6) 0.7113(3) 0.8351(5) 0.0471(19) Uani 1 1 d . U . . .
H56 H 0.9009 0.6870 0.8232 0.057 Uiso 1 1 calc R U . . .
C57 C 0.2685(7) 0.5721(3) 0.9521(5) 0.051(2) Uani 1 1 d . U . . .
H57 H 0.2337 0.5885 0.9155 0.062 Uiso 1 1 calc R U . . .
C58 C 0.2212(8) 0.5555(3) 0.9963(6) 0.068(3) Uani 1 1 d . U . . .
H58 H 0.1555 0.5608 0.9902 0.082 Uiso 1 1 calc R U . . .
C59 C 0.2708(8) 0.5311(3) 1.0495(6) 0.067(3) Uani 1 1 d . U . . .
H59 H 0.2391 0.5193 1.0796 0.081 Uiso 1 1 calc R U . . .
C60 C 0.3685(8) 0.5238(3) 1.0584(6) 0.064(3) Uani 1 1 d . U . . .
H60 H 0.4045 0.5077 1.0950 0.076 Uiso 1 1 calc R U . . .
C61 C 0.4105(7) 0.5411(3) 1.0115(5) 0.049(2) Uani 1 1 d . U . . .
H61 H 0.4757 0.5357 1.0160 0.059 Uiso 1 1 calc R U . . .
C62 C 0.0263(6) 0.6076(3) 0.7223(5) 0.051(2) Uani 1 1 d . U . . .
H62 H 0.0110 0.5964 0.6769 0.061 Uiso 1 1 calc R U . . .
C63 C -0.0323(7) 0.5993(3) 0.7649(5) 0.059(2) Uani 1 1 d . U . . .
H63 H -0.0854 0.5826 0.7489 0.071 Uiso 1 1 calc R U . . .
C64 C -0.0116(7) 0.6160(3) 0.8310(5) 0.054(2) Uani 1 1 d . U . . .
H64 H -0.0510 0.6114 0.8607 0.065 Uiso 1 1 calc R U . . .
C65 C 0.0681(7) 0.6396(3) 0.8525(5) 0.055(2) Uani 1 1 d . U . . .
H65 H 0.0851 0.6508 0.8980 0.066 Uiso 1 1 calc R U . . .
C66 C 0.1232(6) 0.6469(3) 0.8068(5) 0.0437(19) Uani 1 1 d . U . . .
H66 H 0.1762 0.6637 0.8216 0.052 Uiso 1 1 calc R U . . .
C67 C 0.5300(8) 0.5327(3) 0.7238(6) 0.068(2) Uani 1 1 d . U . . .
H67 H 0.4882 0.5537 0.7222 0.082 Uiso 1 1 calc R U . . .
C68 C 0.4884(9) 0.4965(3) 0.7063(6) 0.078(3) Uani 1 1 d . U . . .
H68 H 0.4208 0.4936 0.6925 0.094 Uiso 1 1 calc R U . . .
C69 C 0.5447(12) 0.4664(4) 0.7091(8) 0.112(4) Uani 1 1 d . U . . .
H69 H 0.5179 0.4417 0.6965 0.134 Uiso 1 1 calc R U . . .
C70 C 0.6414(12) 0.4712(4) 0.7304(9) 0.125(4) Uani 1 1 d . U . . .
H70 H 0.6832 0.4500 0.7352 0.149 Uiso 1 1 calc R U . . .
C71 C 0.6791(10) 0.5098(4) 0.7455(7) 0.097(3) Uani 1 1 d . U . . .
H71 H 0.7464 0.5136 0.7580 0.117 Uiso 1 1 calc R U . . .
C72 C 0.3553(8) 0.5615(3) 0.5680(6) 0.073(2) Uani 1 1 d . U . . .
H72 H 0.3425 0.5744 0.6063 0.087 Uiso 1 1 calc R U . . .
C73 C 0.3169(10) 0.5248(4) 0.5531(8) 0.097(3) Uani 1 1 d . U . . .
H73 H 0.2794 0.5139 0.5801 0.116 Uiso 1 1 calc R U . . .
C74 C 0.3336(11) 0.5059(4) 0.5015(8) 0.112(4) Uani 1 1 d . U . . .
H74 H 0.3071 0.4812 0.4894 0.134 Uiso 1 1 calc R U . . .
C75 C 0.3902(12) 0.5222(4) 0.4647(8) 0.118(4) Uani 1 1 d . U . . .
H75 H 0.4071 0.5084 0.4289 0.142 Uiso 1 1 calc R U . . .
C76 C 0.4228(9) 0.5601(4) 0.4817(7) 0.086(3) Uani 1 1 d . U . . .
H76 H 0.4575 0.5721 0.4537 0.103 Uiso 1 1 calc R U . . .
C77 C 0.9202(8) 0.7031(3) 0.6283(6) 0.068(3) Uani 1 1 d . U . . .
H77 H 0.9687 0.6880 0.6183 0.082 Uiso 1 1 calc R U . . .
C78 C 0.8414(8) 0.6857(3) 0.6430(5) 0.066(2) Uani 1 1 d . U . . .
H78 H 0.8358 0.6587 0.6424 0.079 Uiso 1 1 calc R U . . .
C79 C 0.7720(8) 0.7081(3) 0.6584(5) 0.063(2) Uani 1 1 d . U . . .
H79 H 0.7177 0.6965 0.6672 0.076 Uiso 1 1 calc R U . . .
C80 C 0.7820(8) 0.7471(3) 0.6608(6) 0.069(2) Uani 1 1 d . U . . .
H80 H 0.7351 0.7628 0.6719 0.083 Uiso 1 1 calc R U . . .
C81 C 0.8621(8) 0.7638(3) 0.6467(6) 0.072(3) Uani 1 1 d . U . . .
H81 H 0.8707 0.7907 0.6501 0.086 Uiso 1 1 calc R U . . .
C82 C 0.1223(9) 0.7492(4) 0.5489(6) 0.077(3) Uani 1 1 d . U . . .
H82 H 0.1196 0.7224 0.5560 0.093 Uiso 1 1 calc R U . . .
C83 C 0.1857(11) 0.7652(4) 0.5160(7) 0.101(3) Uani 1 1 d . U . . .
H83 H 0.2293 0.7493 0.5016 0.121 Uiso 1 1 calc R U . . .
C84 C 0.1854(11) 0.8037(4) 0.5044(7) 0.097(3) Uani 1 1 d . U . . .
H84 H 0.2274 0.8142 0.4805 0.116 Uiso 1 1 calc R U . . .
C85 C 0.1245(10) 0.8278(4) 0.5269(7) 0.095(3) Uani 1 1 d . U . . .
H85 H 0.1246 0.8546 0.5194 0.114 Uiso 1 1 calc R U . . .
C86 C 0.0622(9) 0.8108(4) 0.5615(6) 0.078(3) Uani 1 1 d . U . . .
H86 H 0.0192 0.8258 0.5784 0.094 Uiso 1 1 calc R U . . .
C87 C 0.5683(17) 0.3792(6) 0.8250(13) 0.171(5) Uani 1 1 d . U . . .
H87 H 0.5140 0.3872 0.8385 0.205 Uiso 1 1 calc R U . . .
C88 C 0.6464(19) 0.3752(6) 0.8736(14) 0.183(6) Uani 1 1 d . U . . .
H88 H 0.6486 0.3780 0.9216 0.220 Uiso 1 1 calc R U . . .
C89 C 0.7326(19) 0.3661(6) 0.8535(14) 0.190(6) Uani 1 1 d . U . . .
H89 H 0.7937 0.3641 0.8871 0.228 Uiso 1 1 calc R U . . .
C90 C 0.720(2) 0.3607(7) 0.7836(15) 0.202(5) Uani 1 1 d . U . . .
H90 H 0.7752 0.3543 0.7698 0.243 Uiso 1 1 calc R U . . .
C91 C 0.6381(18) 0.3633(6) 0.7326(13) 0.174(5) Uani 1 1 d . U . . .
H91 H 0.6345 0.3591 0.6847 0.209 Uiso 1 1 calc R U . . .
C92 C 0.8665(14) 0.4377(8) 0.6509(13) 0.312(8) Uani 1 1 d D U . . .
H92 H 0.8411 0.4227 0.6099 0.374 Uiso 1 1 calc R U . . .
C93 C 0.8817(15) 0.4214(5) 0.7178(17) 0.289(7) Uani 1 1 d D U . . .
H93 H 0.8663 0.3953 0.7219 0.347 Uiso 1 1 calc R U . . .
C94 C 0.9191(16) 0.4432(8) 0.7783(12) 0.303(8) Uani 1 1 d D U . . .
H94 H 0.9291 0.4319 0.8233 0.363 Uiso 1 1 calc R U . . .
C95 C 0.9420(15) 0.4817(8) 0.7726(12) 0.274(7) Uani 1 1 d D U . . .
H95 H 0.9683 0.4965 0.8138 0.329 Uiso 1 1 calc R U . . .
C96 C 0.9261(16) 0.4985(5) 0.7062(16) 0.300(8) Uani 1 1 d D U . . .
H96 H 0.9403 0.5248 0.7025 0.360 Uiso 1 1 calc R U . . .
C97 C 0.0459(14) 0.5325(7) 0.4708(10) 0.185(6) Uani 1 1 d D U . . .
H97 H 0.0681 0.5529 0.4479 0.222 Uiso 1 1 calc R U . A 1
C98 C 0.0383(12) 0.5349(5) 0.5396(9) 0.152(4) Uani 0.5 1 d D U P A 2
H98 H 0.0683 0.5552 0.5697 0.183 Uiso 0.5 1 calc R U P A 2
C99 C -0.0143(14) 0.5068(6) 0.5637(10) 0.179(6) Uani 1 1 d D U . . .
H99 H -0.0319 0.5126 0.6049 0.215 Uiso 1 1 calc R U . A 1
 
loop_
 _atom_site_aniso_label
 _atom_site_aniso_U_11
 _atom_site_aniso_U_22
 _atom_site_aniso_U_33
 _atom_site_aniso_U_23
 _atom_site_aniso_U_13
 _atom_site_aniso_U_12
N9 0.056(5) 0.055(5) 0.073(5) 0.009(4) 0.011(4) -0.008(4)
N11 0.063(5) 0.067(5) 0.066(5) 0.009(4) 0.013(4) -0.015(4)
N12 0.327(13) 0.215(13) 0.332(14) -0.016(13) -0.049(13) -0.008(13)
N22 0.158(8) 0.130(7) 0.194(9) -0.019(8) 0.007(9) -0.016(7)
Tb1 0.02318(19) 0.0295(2) 0.0348(2) 0.00283(18) 0.01104(15) 0.00116(18)
Fe1 0.0263(6) 0.0367(7) 0.0332(6) 0.0063(5) 0.0105(5) 0.0005(5)
Fe2 0.0259(6) 0.0314(6) 0.0395(6) 0.0060(5) 0.0124(5) 0.0037(5)
Fe3 0.0235(6) 0.0361(7) 0.0344(6) 0.0033(5) 0.0075(5) -0.0004(5)
Fe4 0.0324(6) 0.0375(7) 0.0340(6) 0.0039(5) 0.0134(5) 0.0018(5)
N1 0.036(3) 0.032(3) 0.035(3) 0.005(2) 0.018(2) -0.001(3)
N2 0.023(3) 0.040(3) 0.038(3) 0.007(3) 0.012(2) 0.003(3)
N3 0.031(3) 0.034(3) 0.035(3) 0.005(3) 0.009(2) 0.000(3)
N4 0.023(3) 0.044(3) 0.038(3) 0.004(3) 0.013(2) -0.002(3)
N5 0.028(3) 0.048(4) 0.044(3) 0.006(3) 0.017(3) -0.002(3)
N6 0.044(4) 0.043(4) 0.048(4) 0.012(3) 0.020(3) 0.003(3)
N7 0.044(4) 0.042(3) 0.067(4) -0.001(3) 0.015(3) 0.004(3)
N8 0.056(4) 0.048(4) 0.059(4) -0.008(3) 0.023(3) -0.008(3)
N13 0.136(7) 0.149(7) 0.144(7) 0.009(7) -0.006(7) -0.001(6)
O1 0.045(3) 0.054(3) 0.040(3) 0.006(3) 0.021(2) 0.007(3)
O2 0.036(3) 0.048(3) 0.043(3) 0.003(3) 0.017(2) 0.006(3)
O3 0.034(3) 0.041(3) 0.034(3) 0.004(2) 0.018(2) 0.004(2)
O4 0.030(3) 0.052(3) 0.045(3) 0.011(3) 0.015(2) 0.014(2)
O5 0.023(2) 0.040(3) 0.038(3) 0.013(2) 0.009(2) 0.006(2)
O6 0.032(3) 0.048(3) 0.035(3) 0.011(2) 0.011(2) -0.002(2)
O7 0.043(3) 0.036(3) 0.048(3) 0.004(2) 0.011(2) 0.001(2)
O8 0.027(2) 0.031(3) 0.036(2) 0.007(2) 0.010(2) -0.001(2)
O9 0.040(3) 0.040(3) 0.044(3) 0.002(2) 0.009(2) -0.006(2)
O10 0.052(3) 0.044(3) 0.042(3) 0.008(3) 0.022(3) 0.005(3)
O11 0.041(3) 0.045(3) 0.046(3) 0.005(3) 0.018(2) -0.007(3)
O12 0.031(3) 0.035(3) 0.050(3) 0.007(2) 0.009(2) 0.006(2)
O13 0.032(3) 0.035(3) 0.059(3) 0.004(2) 0.014(2) 0.003(2)
O14 0.037(3) 0.039(3) 0.042(3) -0.005(2) 0.019(2) -0.002(2)
O15 0.040(3) 0.040(3) 0.043(3) -0.001(2) 0.017(2) -0.004(3)
O16 0.033(3) 0.038(3) 0.042(3) -0.001(2) 0.013(2) 0.000(2)
O17 0.031(3) 0.038(3) 0.053(3) -0.006(2) 0.015(2) 0.003(2)
O18 0.033(3) 0.067(3) 0.044(3) 0.008(3) 0.008(2) -0.004(3)
O19 0.039(3) 0.055(3) 0.039(3) 0.006(3) 0.011(2) 0.000(3)
O20 0.025(2) 0.043(3) 0.032(2) 0.003(2) 0.010(2) 0.004(2)
C1 0.039(4) 0.042(4) 0.047(4) -0.001(3) 0.026(3) -0.005(3)
C2 0.056(5) 0.065(5) 0.045(4) 0.004(4) 0.027(4) 0.004(4)
C3 0.057(5) 0.074(6) 0.057(5) -0.002(5) 0.033(4) -0.001(5)
C4 0.046(5) 0.064(5) 0.058(5) -0.009(4) 0.036(4) 0.005(4)
C5 0.040(4) 0.046(4) 0.049(4) -0.002(4) 0.022(3) -0.004(4)
C6 0.040(4) 0.040(4) 0.043(4) -0.001(3) 0.023(3) -0.008(3)
C7 0.030(3) 0.029(3) 0.041(3) 0.001(3) 0.016(3) -0.008(3)
C8 0.030(4) 0.036(4) 0.047(4) 0.012(3) 0.005(3) 0.005(3)
C9 0.036(4) 0.050(5) 0.052(4) 0.013(4) 0.011(4) 0.010(4)
C10 0.037(5) 0.065(5) 0.059(5) 0.010(4) -0.002(4) 0.014(4)
C11 0.045(5) 0.066(5) 0.051(5) 0.012(4) 0.001(4) 0.009(4)
C12 0.039(4) 0.053(4) 0.046(4) 0.008(4) 0.010(3) 0.010(4)
C13 0.029(4) 0.036(4) 0.040(4) 0.006(3) 0.007(3) 0.006(3)
C14 0.029(3) 0.034(4) 0.038(4) 0.001(3) 0.009(3) -0.001(3)
C15 0.048(4) 0.033(4) 0.052(4) 0.004(3) 0.020(3) -0.003(3)
C16 0.061(5) 0.035(4) 0.055(5) 0.011(4) 0.012(4) 0.001(4)
C17 0.071(6) 0.036(5) 0.078(6) 0.003(4) 0.019(5) -0.007(4)
C18 0.064(5) 0.050(5) 0.079(6) 0.001(5) 0.009(5) -0.014(5)
C19 0.058(5) 0.045(4) 0.066(5) -0.001(4) 0.008(4) -0.011(4)
C20 0.046(4) 0.036(4) 0.045(4) -0.002(3) 0.018(3) -0.005(3)
C21 0.030(3) 0.030(3) 0.037(4) 0.004(3) 0.014(3) -0.004(3)
C22 0.031(4) 0.055(4) 0.042(4) 0.003(4) 0.005(3) -0.001(3)
C23 0.036(4) 0.094(6) 0.047(5) 0.006(5) -0.001(4) -0.011(4)
C24 0.046(5) 0.125(7) 0.059(5) 0.008(5) 0.000(4) -0.010(5)
C25 0.056(5) 0.134(7) 0.055(5) 0.013(5) 0.002(5) -0.007(6)
C26 0.042(4) 0.110(6) 0.049(4) 0.009(5) 0.010(4) -0.011(5)
C27 0.039(4) 0.064(4) 0.035(4) 0.004(4) 0.005(3) 0.000(4)
C28 0.031(3) 0.049(4) 0.038(4) 0.002(3) 0.009(3) -0.007(3)
C29 0.033(4) 0.050(4) 0.044(4) 0.006(3) 0.021(3) 0.003(3)
C30 0.048(4) 0.044(4) 0.053(4) 0.002(4) 0.024(4) 0.000(4)
C31 0.077(5) 0.045(5) 0.065(5) 0.009(4) 0.020(4) 0.001(4)
C32 0.095(6) 0.054(5) 0.082(6) 0.015(5) 0.017(5) 0.004(5)
C33 0.100(7) 0.052(6) 0.098(7) 0.007(5) 0.020(6) 0.001(6)
C34 0.103(6) 0.063(6) 0.080(6) -0.009(5) 0.029(5) -0.005(6)
C35 0.073(5) 0.050(5) 0.063(5) -0.001(4) 0.022(4) -0.006(4)
C36 0.029(3) 0.040(4) 0.038(3) 0.013(3) 0.009(3) -0.002(3)
C37 0.042(4) 0.036(4) 0.045(4) 0.003(3) 0.012(3) 0.003(3)
C38 0.043(4) 0.042(4) 0.058(4) -0.005(4) 0.011(4) 0.003(4)
C39 0.061(5) 0.042(5) 0.068(5) -0.004(4) 0.006(4) -0.003(4)
C40 0.072(6) 0.049(5) 0.064(5) -0.014(5) 0.012(5) 0.011(5)
C41 0.058(5) 0.055(5) 0.063(5) -0.006(4) 0.021(4) 0.013(4)
C42 0.046(4) 0.045(4) 0.059(4) 0.000(4) 0.020(4) 0.007(4)
C43 0.035(4) 0.044(4) 0.034(3) 0.000(3) 0.012(3) -0.006(3)
C44 0.032(4) 0.047(4) 0.032(4) -0.011(3) 0.009(3) -0.003(4)
C45 0.053(4) 0.049(4) 0.049(4) -0.008(4) 0.013(4) 0.003(4)
C46 0.067(5) 0.056(5) 0.059(5) -0.013(4) 0.010(4) 0.012(4)
C47 0.056(6) 0.077(6) 0.069(6) -0.021(5) 0.006(5) 0.015(5)
C48 0.054(5) 0.082(6) 0.062(5) -0.023(5) 0.025(4) -0.001(5)
C49 0.043(4) 0.057(4) 0.051(4) -0.012(4) 0.021(4) -0.005(4)
C50 0.033(4) 0.041(4) 0.033(3) 0.006(3) 0.018(3) 0.004(3)
C51 0.040(4) 0.041(4) 0.048(4) -0.003(3) 0.018(3) -0.007(4)
C52 0.046(4) 0.046(4) 0.068(5) -0.011(4) 0.026(4) -0.001(4)
C53 0.063(5) 0.042(5) 0.075(5) -0.018(4) 0.024(5) -0.007(4)
C54 0.058(5) 0.058(5) 0.079(6) -0.010(5) 0.024(5) -0.022(5)
C55 0.045(5) 0.056(5) 0.067(5) -0.008(4) 0.021(4) -0.014(4)
C56 0.043(4) 0.037(4) 0.063(4) -0.009(4) 0.017(4) -0.004(4)
C57 0.045(4) 0.056(4) 0.059(4) 0.015(4) 0.025(4) 0.000(4)
C58 0.057(5) 0.068(6) 0.088(6) 0.014(5) 0.035(5) -0.005(5)
C59 0.075(6) 0.056(5) 0.080(6) 0.017(5) 0.039(5) -0.011(5)
C60 0.068(6) 0.056(5) 0.069(6) 0.019(5) 0.024(5) -0.001(5)
C61 0.051(4) 0.052(4) 0.048(4) 0.015(4) 0.021(4) 0.007(4)
C62 0.037(4) 0.066(5) 0.052(4) -0.006(4) 0.016(4) -0.011(4)
C63 0.043(5) 0.070(6) 0.071(6) -0.001(5) 0.026(4) -0.018(5)
C64 0.041(5) 0.058(5) 0.070(5) 0.011(5) 0.025(4) 0.004(4)
C65 0.049(5) 0.070(5) 0.052(5) 0.001(4) 0.023(4) 0.003(4)
C66 0.035(4) 0.049(4) 0.050(4) 0.003(4) 0.015(3) -0.010(4)
C67 0.062(4) 0.059(4) 0.086(5) -0.017(4) 0.024(4) -0.007(4)
C68 0.081(5) 0.068(5) 0.089(5) -0.016(5) 0.029(5) -0.014(5)
C69 0.108(7) 0.077(6) 0.136(7) -0.004(6) 0.010(6) -0.012(6)
C70 0.117(7) 0.076(6) 0.153(7) -0.015(6) -0.004(7) 0.012(6)
C71 0.085(6) 0.069(5) 0.118(6) -0.010(5) -0.002(5) 0.002(5)
C72 0.079(5) 0.061(4) 0.083(5) -0.008(4) 0.031(4) -0.007(4)
C73 0.106(6) 0.079(6) 0.113(6) -0.013(6) 0.046(5) -0.032(5)
C74 0.124(8) 0.091(7) 0.123(8) -0.028(7) 0.042(7) -0.051(7)
C75 0.144(8) 0.094(7) 0.124(7) -0.037(7) 0.051(7) -0.041(7)
C76 0.099(6) 0.075(5) 0.093(6) -0.021(5) 0.041(5) -0.030(5)
C77 0.067(6) 0.060(6) 0.077(6) -0.005(5) 0.018(5) -0.002(5)
C78 0.063(5) 0.060(5) 0.072(5) 0.000(4) 0.014(4) -0.009(4)
C79 0.054(4) 0.070(5) 0.066(4) 0.008(4) 0.017(4) -0.012(4)
C80 0.060(5) 0.077(6) 0.072(5) 0.002(5) 0.022(4) 0.006(5)
C81 0.071(6) 0.054(6) 0.085(6) 0.006(5) 0.015(5) 0.008(5)
C82 0.082(5) 0.076(5) 0.075(5) 0.000(5) 0.025(5) 0.002(5)
C83 0.109(7) 0.108(7) 0.095(7) -0.003(6) 0.047(6) -0.004(7)
C84 0.105(7) 0.102(7) 0.089(6) 0.022(6) 0.037(6) -0.013(6)
C85 0.092(7) 0.087(7) 0.094(7) 0.032(6) 0.010(6) -0.006(6)
C86 0.071(6) 0.076(6) 0.077(5) 0.014(5) 0.005(5) 0.003(5)
C87 0.161(10) 0.133(8) 0.187(10) -0.017(9) 0.000(9) -0.012(8)
C88 0.169(11) 0.138(9) 0.208(11) -0.018(9) -0.002(10) 0.000(10)
C89 0.170(11) 0.151(9) 0.213(11) -0.024(10) -0.003(11) 0.002(9)
C90 0.190(10) 0.159(9) 0.218(11) -0.023(9) -0.006(10) 0.012(9)
C91 0.161(9) 0.128(8) 0.203(9) -0.028(8) 0.003(9) 0.002(8)
C92 0.325(13) 0.202(13) 0.320(14) -0.016(13) -0.046(13) 0.000(13)
C93 0.300(12) 0.195(12) 0.292(13) -0.013(12) -0.042(12) 0.009(12)
C94 0.312(13) 0.198(13) 0.309(14) -0.017(13) -0.053(13) 0.002(13)
C95 0.275(12) 0.186(12) 0.283(13) -0.011(12) -0.043(12) 0.000(12)
C96 0.308(13) 0.205(13) 0.306(15) -0.027(13) -0.044(14) -0.009(13)
C97 0.174(10) 0.172(10) 0.170(10) -0.017(10) -0.010(10) 0.002(9)
C98 0.136(7) 0.149(7) 0.144(7) 0.009(7) -0.006(7) -0.001(6)
C99 0.153(10) 0.155(10) 0.185(10) -0.004(10) -0.022(9) -0.026(9)
 
_geom_special_details
;
 All esds (except the esd in the dihedral angle between two l.s. planes)
 are estimated using the full covariance matrix.  The cell esds are taken
 into account individually in the estimation of esds in distances, angles
 and torsion angles; correlations between esds in cell parameters are only
 used when they are defined by crystal symmetry.  An approximate (isotropic)
 treatment of cell esds is used for estimating esds involving l.s. planes.
;
 
loop_
 _geom_bond_atom_site_label_1
 _geom_bond_atom_site_label_2
 _geom_bond_distance
 _geom_bond_site_symmetry_2
 _geom_bond_publ_flag
N9 C81 1.302(13) . ?
N9 C77 1.334(13) . ?
N11 C86 1.302(13) . ?
N11 C82 1.283(13) . ?
N12 C96 1.374(9) . ?
N12 C92 1.387(9) . ?
N22 C87 1.35(2) . ?
N22 C91 1.41(2) . ?
Tb1 O11 2.338(5) . ?
Tb1 O13 2.358(5) . ?
Tb1 O14 2.362(5) . ?
Tb1 O5 2.366(5) . ?
Tb1 O16 2.382(5) . ?
Tb1 O3 2.383(5) . ?
Tb1 O20 2.402(5) . ?
Tb1 O8 2.458(5) . ?
Fe1 O7 1.948(6) . ?
Fe1 O5 1.976(5) . ?
Fe1 O6 2.007(5) . ?
Fe1 O15 2.048(6) . ?
Fe1 N3 2.049(6) . ?
Fe1 N6 2.176(7) . ?
Fe2 O4 1.913(5) . ?
Fe2 O2 1.985(5) . ?
Fe2 O3 2.010(5) . ?
Fe2 O17 2.015(6) . ?
Fe2 N2 2.036(6) . ?
Fe2 N7 2.227(8) . ?
Fe3 O18 1.905(6) . ?
Fe3 O8 2.006(5) . ?
Fe3 O12 2.010(6) . ?
Fe3 O9 2.015(6) . ?
Fe3 N4 2.059(6) . ?
Fe3 N5 2.206(6) . ?
Fe4 O1 1.897(5) . ?
Fe4 O19 1.990(6) . ?
Fe4 O20 1.997(5) . ?
Fe4 O10 2.031(6) . ?
Fe4 N1 2.053(6) . ?
Fe4 N8 2.280(8) . ?
N1 C7 1.329(9) . ?
N1 O3 1.396(7) . ?
N2 C14 1.298(9) . ?
N2 O5 1.404(7) . ?
N3 C21 1.317(9) . ?
N3 O8 1.407(8) . ?
N4 C28 1.316(10) . ?
N4 O20 1.412(7) . ?
N5 C62 1.322(10) . ?
N5 C66 1.327(10) . ?
N6 C57 1.332(11) . ?
N6 C61 1.346(10) . ?
N7 C67 1.292(12) . ?
N7 C71 1.294(14) . ?
N8 C72 1.289(12) . ?
N8 C76 1.302(13) . ?
N13 C97 1.378(9) . ?
N13 C99 1.382(9) . ?
O1 C1 1.316(9) . ?
O2 C7 1.298(9) . ?
O4 C8 1.335(9) . ?
O6 C14 1.303(9) . ?
O7 C15 1.308(10) . ?
O9 C21 1.273(9) . ?
O10 C29 1.284(10) . ?
O11 C29 1.240(9) . ?
O12 C36 1.286(9) . ?
O13 C36 1.252(9) . ?
O14 C43 1.240(9) . ?
O15 C43 1.262(9) . ?
O16 C50 1.269(9) . ?
O17 C50 1.280(9) . ?
O18 C22 1.313(9) . ?
O19 C28 1.281(9) . ?
C1 C2 1.402(11) . ?
C1 C6 1.402(11) . ?
C2 C3 1.362(12) . ?
C3 C4 1.357(13) . ?
C4 C5 1.364(11) . ?
C5 C6 1.399(11) . ?
C6 C7 1.485(10) . ?
C8 C9 1.397(11) . ?
C8 C13 1.411(11) . ?
C9 C10 1.346(12) . ?
C10 C11 1.383(13) . ?
C11 C12 1.381(12) . ?
C12 C13 1.397(11) . ?
C13 C14 1.477(10) . ?
C15 C16 1.414(11) . ?
C15 C20 1.414(12) . ?
C16 C17 1.343(13) . ?
C17 C18 1.383(13) . ?
C18 C19 1.371(13) . ?
C19 C20 1.392(12) . ?
C20 C21 1.483(11) . ?
C22 C23 1.388(11) . ?
C22 C27 1.409(12) . ?
C23 C24 1.364(13) . ?
C24 C25 1.377(14) . ?
C25 C26 1.375(13) . ?
C26 C27 1.397(12) . ?
C27 C28 1.469(11) . ?
C29 C30 1.499(12) . ?
C30 C35 1.369(13) . ?
C30 C31 1.374(12) . ?
C31 C32 1.392(13) . ?
C32 C33 1.351(15) . ?
C33 C34 1.373(15) . ?
C34 C35 1.376(14) . ?
C36 C37 1.470(11) . ?
C37 C38 1.359(12) . ?
C37 C42 1.375(12) . ?
C38 C39 1.373(12) . ?
C39 C40 1.390(14) . ?
C40 C41 1.353(14) . ?
C41 C42 1.377(12) . ?
C43 C44 1.507(11) . ?
C44 C45 1.374(12) . ?
C44 C49 1.382(11) . ?
C45 C46 1.404(12) . ?
C46 C47 1.353(14) . ?
C47 C48 1.349(15) . ?
C48 C49 1.404(12) . ?
C50 C51 1.471(11) . ?
C51 C52 1.364(12) . ?
C51 C56 1.376(11) . ?
C52 C53 1.391(12) . ?
C53 C54 1.372(13) . ?
C54 C55 1.362(13) . ?
C55 C56 1.363(12) . ?
C57 C58 1.363(12) . ?
C58 C59 1.361(14) . ?
C59 C60 1.379(14) . ?
C60 C61 1.363(12) . ?
C62 C63 1.368(12) . ?
C63 C64 1.360(13) . ?
C64 C65 1.361(13) . ?
C65 C66 1.370(11) . ?
C67 C68 1.376(14) . ?
C68 C69 1.299(17) . ?
C69 C70 1.334(18) . ?
C70 C71 1.426(17) . ?
C72 C73 1.368(15) . ?
C73 C74 1.274(17) . ?
C74 C75 1.346(18) . ?
C75 C76 1.387(16) . ?
C77 C78 1.374(14) . ?
C78 C79 1.353(14) . ?
C79 C80 1.345(14) . ?
C80 C81 1.375(14) . ?
C82 C83 1.367(16) . ?
C83 C84 1.338(17) . ?
C84 C85 1.359(17) . ?
C85 C86 1.390(16) . ?
C87 C88 1.25(2) . ?
C88 C89 1.43(3) . ?
C89 C90 1.33(3) . ?
C90 C91 1.30(3) . ?
C92 C93 1.374(9) . ?
C93 C94 1.366(9) . ?
C94 C95 1.371(9) . ?
C95 C96 1.372(9) . ?
C97 C98 1.378(9) . ?
C97 C99 1.52(2) 3_566 ?
C98 C99 1.382(9) . ?
C99 C97 1.52(2) 3_566 ?
 
loop_
 _geom_angle_atom_site_label_1
 _geom_angle_atom_site_label_2
 _geom_angle_atom_site_label_3
 _geom_angle
 _geom_angle_site_symmetry_1
 _geom_angle_site_symmetry_3
 _geom_angle_publ_flag
C81 N9 C77 121.9(10) . . ?
C86 N11 C82 127.6(11) . . ?
C96 N12 C92 119.6(12) . . ?
C87 N22 C91 118(2) . . ?
O11 Tb1 O13 74.59(19) . . ?
O11 Tb1 O14 119.21(19) . . ?
O13 Tb1 O14 74.86(19) . . ?
O11 Tb1 O5 144.06(18) . . ?
O13 Tb1 O5 140.99(18) . . ?
O14 Tb1 O5 77.73(18) . . ?
O11 Tb1 O16 72.43(19) . . ?
O13 Tb1 O16 116.90(19) . . ?
O14 Tb1 O16 76.74(18) . . ?
O5 Tb1 O16 82.43(18) . . ?
O11 Tb1 O3 81.05(19) . . ?
O13 Tb1 O3 144.09(18) . . ?
O14 Tb1 O3 140.91(18) . . ?
O5 Tb1 O3 69.03(17) . . ?
O16 Tb1 O3 79.00(18) . . ?
O11 Tb1 O20 77.42(18) . . ?
O13 Tb1 O20 79.30(18) . . ?
O14 Tb1 O20 143.14(17) . . ?
O5 Tb1 O20 108.72(18) . . ?
O16 Tb1 O20 139.36(17) . . ?
O3 Tb1 O20 69.82(17) . . ?
O11 Tb1 O8 140.77(18) . . ?
O13 Tb1 O8 75.05(18) . . ?
O14 Tb1 O8 75.19(17) . . ?
O5 Tb1 O8 71.44(16) . . ?
O16 Tb1 O8 144.94(17) . . ?
O3 Tb1 O8 111.31(17) . . ?
O20 Tb1 O8 73.02(16) . . ?
O7 Fe1 O5 100.5(2) . . ?
O7 Fe1 O6 91.4(2) . . ?
O5 Fe1 O6 77.5(2) . . ?
O7 Fe1 O15 160.2(2) . . ?
O5 Fe1 O15 97.2(2) . . ?
O6 Fe1 O15 101.1(2) . . ?
O7 Fe1 N3 84.9(2) . . ?
O5 Fe1 N3 81.2(2) . . ?
O6 Fe1 N3 157.3(2) . . ?
O15 Fe1 N3 89.2(2) . . ?
O7 Fe1 N6 83.0(3) . . ?
O5 Fe1 N6 171.4(3) . . ?
O6 Fe1 N6 94.6(2) . . ?
O15 Fe1 N6 80.8(2) . . ?
N3 Fe1 N6 107.1(3) . . ?
O4 Fe2 O2 105.3(2) . . ?
O4 Fe2 O3 175.0(2) . . ?
O2 Fe2 O3 78.4(2) . . ?
O4 Fe2 O17 90.8(2) . . ?
O2 Fe2 O17 92.5(2) . . ?
O3 Fe2 O17 92.5(2) . . ?
O4 Fe2 N2 88.3(2) . . ?
O2 Fe2 N2 164.6(2) . . ?
O3 Fe2 N2 87.6(2) . . ?
O17 Fe2 N2 94.5(2) . . ?
O4 Fe2 N7 87.5(3) . . ?
O2 Fe2 N7 86.2(3) . . ?
O3 Fe2 N7 89.4(3) . . ?
O17 Fe2 N7 177.5(3) . . ?
N2 Fe2 N7 87.2(3) . . ?
O18 Fe3 O8 174.5(2) . . ?
O18 Fe3 O12 96.0(2) . . ?
O8 Fe3 O12 89.5(2) . . ?
O18 Fe3 O9 96.4(3) . . ?
O8 Fe3 O9 78.1(2) . . ?
O12 Fe3 O9 162.0(2) . . ?
O18 Fe3 N4 87.1(2) . . ?
O8 Fe3 N4 92.9(2) . . ?
O12 Fe3 N4 96.5(2) . . ?
O9 Fe3 N4 97.1(2) . . ?
O18 Fe3 N5 88.6(2) . . ?
O8 Fe3 N5 91.5(2) . . ?
O12 Fe3 N5 83.5(2) . . ?
O9 Fe3 N5 83.8(2) . . ?
N4 Fe3 N5 175.6(3) . . ?
O1 Fe4 O19 104.6(2) . . ?
O1 Fe4 O20 175.5(2) . . ?
O19 Fe4 O20 78.7(2) . . ?
O1 Fe4 O10 90.2(2) . . ?
O19 Fe4 O10 90.1(2) . . ?
O20 Fe4 O10 92.8(2) . . ?
O1 Fe4 N1 89.1(2) . . ?
O19 Fe4 N1 162.9(2) . . ?
O20 Fe4 N1 87.1(2) . . ?
O10 Fe4 N1 100.3(2) . . ?
O1 Fe4 N8 88.8(3) . . ?
O19 Fe4 N8 81.5(3) . . ?
O20 Fe4 N8 88.7(3) . . ?
O10 Fe4 N8 171.0(3) . . ?
N1 Fe4 N8 88.6(3) . . ?
C7 N1 O3 112.6(6) . . ?
C7 N1 Fe4 128.3(5) . . ?
O3 N1 Fe4 118.8(4) . . ?
C14 N2 O5 111.5(6) . . ?
C14 N2 Fe2 130.8(5) . . ?
O5 N2 Fe2 116.2(4) . . ?
C21 N3 O8 111.8(6) . . ?
C21 N3 Fe1 132.4(5) . . ?
O8 N3 Fe1 115.0(4) . . ?
C28 N4 O20 111.8(6) . . ?
C28 N4 Fe3 130.9(5) . . ?
O20 N4 Fe3 116.7(4) . . ?
C62 N5 C66 117.1(7) . . ?
C62 N5 Fe3 121.1(6) . . ?
C66 N5 Fe3 121.6(5) . . ?
C57 N6 C61 117.2(8) . . ?
C57 N6 Fe1 121.9(6) . . ?
C61 N6 Fe1 120.5(6) . . ?
C67 N7 C71 116.1(10) . . ?
C67 N7 Fe2 124.0(7) . . ?
C71 N7 Fe2 119.9(8) . . ?
C72 N8 C76 113.3(10) . . ?
C72 N8 Fe4 123.9(7) . . ?
C76 N8 Fe4 122.4(7) . . ?
C97 N13 C99 119.5(14) . . ?
C1 O1 Fe4 132.1(5) . . ?
C7 O2 Fe2 114.7(5) . . ?
N1 O3 Fe2 113.9(4) . . ?
N1 O3 Tb1 122.6(4) . . ?
Fe2 O3 Tb1 119.0(2) . . ?
C8 O4 Fe2 130.9(5) . . ?
N2 O5 Fe1 114.0(4) . . ?
N2 O5 Tb1 118.5(4) . . ?
Fe1 O5 Tb1 123.7(2) . . ?
C14 O6 Fe1 112.1(5) . . ?
C15 O7 Fe1 128.6(5) . . ?
N3 O8 Fe3 111.6(4) . . ?
N3 O8 Tb1 119.1(4) . . ?
Fe3 O8 Tb1 117.2(2) . . ?
C21 O9 Fe3 111.7(5) . . ?
C29 O10 Fe4 126.9(5) . . ?
C29 O11 Tb1 139.4(5) . . ?
C36 O12 Fe3 129.9(5) . . ?
C36 O13 Tb1 143.7(5) . . ?
C43 O14 Tb1 133.9(5) . . ?
C43 O15 Fe1 133.7(5) . . ?
C50 O16 Tb1 140.1(5) . . ?
C50 O17 Fe2 130.9(5) . . ?
C22 O18 Fe3 134.3(5) . . ?
C28 O19 Fe4 113.5(5) . . ?
N4 O20 Fe4 113.3(4) . . ?
N4 O20 Tb1 123.2(4) . . ?
Fe4 O20 Tb1 119.5(2) . . ?
O1 C1 C2 118.7(8) . . ?
O1 C1 C6 123.8(7) . . ?
C2 C1 C6 117.5(8) . . ?
C3 C2 C1 121.9(9) . . ?
C4 C3 C2 120.7(9) . . ?
C3 C4 C5 119.2(9) . . ?
C4 C5 C6 122.1(9) . . ?
C5 C6 C1 118.6(7) . . ?
C5 C6 C7 116.8(8) . . ?
C1 C6 C7 124.6(7) . . ?
O2 C7 N1 120.2(7) . . ?
O2 C7 C6 118.8(7) . . ?
N1 C7 C6 120.9(7) . . ?
O4 C8 C9 118.2(8) . . ?
O4 C8 C13 124.1(7) . . ?
C9 C8 C13 117.6(8) . . ?
C10 C9 C8 123.3(9) . . ?
C9 C10 C11 119.9(9) . . ?
C12 C11 C10 118.7(9) . . ?
C11 C12 C13 122.3(9) . . ?
C12 C13 C8 118.2(7) . . ?
C12 C13 C14 118.3(7) . . ?
C8 C13 C14 123.5(7) . . ?
N2 C14 O6 121.1(7) . . ?
N2 C14 C13 120.4(7) . . ?
O6 C14 C13 118.5(7) . . ?
O7 C15 C16 120.0(8) . . ?
O7 C15 C20 123.2(7) . . ?
C16 C15 C20 116.7(8) . . ?
C17 C16 C15 121.7(9) . . ?
C16 C17 C18 122.4(9) . . ?
C19 C18 C17 117.2(10) . . ?
C18 C19 C20 122.9(10) . . ?
C19 C20 C15 119.1(8) . . ?
C19 C20 C21 117.5(8) . . ?
C15 C20 C21 123.2(8) . . ?
O9 C21 N3 122.4(7) . . ?
O9 C21 C20 119.9(7) . . ?
N3 C21 C20 117.7(7) . . ?
O18 C22 C23 118.4(8) . . ?
O18 C22 C27 122.3(7) . . ?
C23 C22 C27 119.4(8) . . ?
C24 C23 C22 121.7(10) . . ?
C23 C24 C25 120.0(10) . . ?
C26 C25 C24 119.2(10) . . ?
C25 C26 C27 122.4(9) . . ?
C26 C27 C22 117.3(8) . . ?
C26 C27 C28 117.1(8) . . ?
C22 C27 C28 125.6(8) . . ?
O19 C28 N4 122.0(7) . . ?
O19 C28 C27 118.7(7) . . ?
N4 C28 C27 119.4(7) . . ?
O11 C29 O10 123.6(8) . . ?
O11 C29 C30 119.5(8) . . ?
O10 C29 C30 116.9(8) . . ?
C35 C30 C31 119.7(9) . . ?
C35 C30 C29 119.5(9) . . ?
C31 C30 C29 120.8(9) . . ?
C30 C31 C32 120.4(10) . . ?
C33 C32 C31 119.3(11) . . ?
C32 C33 C34 120.5(11) . . ?
C33 C34 C35 120.5(11) . . ?
C30 C35 C34 119.6(10) . . ?
O13 C36 O12 121.8(8) . . ?
O13 C36 C37 120.2(7) . . ?
O12 C36 C37 118.0(7) . . ?
C38 C37 C42 119.4(8) . . ?
C38 C37 C36 121.1(8) . . ?
C42 C37 C36 119.5(8) . . ?
C37 C38 C39 121.4(9) . . ?
C38 C39 C40 118.8(10) . . ?
C41 C40 C39 119.9(10) . . ?
C40 C41 C42 120.7(10) . . ?
C37 C42 C41 119.7(9) . . ?
O14 C43 O15 125.6(8) . . ?
O14 C43 C44 118.5(7) . . ?
O15 C43 C44 115.9(7) . . ?
C45 C44 C49 119.4(8) . . ?
C45 C44 C43 120.2(8) . . ?
C49 C44 C43 120.2(8) . . ?
C44 C45 C46 120.1(9) . . ?
C47 C46 C45 119.7(10) . . ?
C48 C47 C46 120.9(10) . . ?
C47 C48 C49 120.5(10) . . ?
C44 C49 C48 119.2(9) . . ?
O16 C50 O17 122.4(8) . . ?
O16 C50 C51 120.8(7) . . ?
O17 C50 C51 116.8(7) . . ?
C52 C51 C56 119.0(8) . . ?
C52 C51 C50 121.5(8) . . ?
C56 C51 C50 119.4(8) . . ?
C51 C52 C53 119.7(9) . . ?
C54 C53 C52 120.0(9) . . ?
C55 C54 C53 120.3(9) . . ?
C54 C55 C56 119.3(9) . . ?
C55 C56 C51 121.7(9) . . ?
N6 C57 C58 122.5(9) . . ?
C59 C58 C57 119.5(10) . . ?
C58 C59 C60 119.5(10) . . ?
C61 C60 C59 117.6(10) . . ?
N6 C61 C60 123.7(9) . . ?
N5 C62 C63 123.6(9) . . ?
C64 C63 C62 118.8(9) . . ?
C63 C64 C65 118.3(9) . . ?
C64 C65 C66 119.7(9) . . ?
N5 C66 C65 122.4(8) . . ?
N7 C67 C68 124.9(11) . . ?
C69 C68 C67 119.2(13) . . ?
C68 C69 C70 119.2(15) . . ?
C69 C70 C71 118.4(15) . . ?
N7 C71 C70 122.1(13) . . ?
N8 C72 C73 126.8(12) . . ?
C74 C73 C72 118.5(14) . . ?
C73 C74 C75 119.1(14) . . ?
C74 C75 C76 118.3(14) . . ?
N8 C76 C75 123.7(12) . . ?
N9 C77 C78 118.9(11) . . ?
C79 C78 C77 119.8(11) . . ?
C80 C79 C78 119.6(11) . . ?
C79 C80 C81 119.4(11) . . ?
N9 C81 C80 120.2(11) . . ?
N11 C82 C83 116.4(13) . . ?
C84 C83 C82 120.3(14) . . ?
C83 C84 C85 120.9(14) . . ?
C84 C85 C86 117.6(13) . . ?
N11 C86 C85 117.1(13) . . ?
C88 C87 N22 126(3) . . ?
C87 C88 C89 118(3) . . ?
C90 C89 C88 116(3) . . ?
C91 C90 C89 127(3) . . ?
C90 C91 N22 116(3) . . ?
C93 C92 N12 119.4(12) . . ?
C94 C93 C92 120.7(12) . . ?
C93 C94 C95 120.0(12) . . ?
C94 C95 C96 120.0(12) . . ?
C95 C96 N12 120.3(12) . . ?
C98 C97 C99 112.6(18) . 3_566 ?
N13 C97 C99 112.6(18) . 3_566 ?
C97 C98 C99 119.5(14) . . ?
C98 C99 C97 126.2(18) . 3_566 ?
N13 C99 C97 126.2(18) . 3_566 ?
 
_refine_diff_density_max    1.031
_refine_diff_density_min   -1.458
_refine_diff_density_rms    0.125

_shelx_res_file
;

    170616g.res created by SHELXL-2014/7

TITL 170616g in P2(1)/n
CELL 0.71073  14.2903  34.2585  19.4615  90.000 106.756  90.000
ZERR    4.00   0.0013   0.0028   0.0016   0.000   0.003   0.000
LATT 1
SYMM 0.5-X, 0.5+Y, 0.5-Z
SFAC C  H  N  O  Fe Tb
UNIT 394 318 50 80 16 4
OMIT  -1.00  50.04
L.S. 10
ACTA
BOND
FMAP 2
PLAN 20
size 0.48 0.30 0.27
eadp n13 c98
exyz n13 c98
simu 0.02 0.04 3.8
flat 0.02 n12 c92 c93 c94 c95 c96
dfix 1.39 0.01 n12 c92 c92 c93 c93 c94 c94 c95 c95 c96 c96 n12 c97 c98 c98 c99
dfix 2.34 0.02 n12 c93 c93 c95 c95 n12 c92 c94 c94 c96 c96 c92 c97 c99
dfix 3.15 0.01 n9 n11
TEMP 25
WGHT    0.029000   73.589508
FVAR       0.17113
MOLE 1
N9    3    0.925863    0.741949    0.628743    11.00000    0.05574    0.05480 =
         0.07263    0.00931    0.01099   -0.00845
N11   3    0.066569    0.773063    0.569399    11.00000    0.06342    0.06685 =
         0.06644    0.00937    0.01269   -0.01484
AFIX  43
H22   2    0.027562    0.762946    0.590863    11.00000   -1.20000
AFIX   0
N12   3    0.889356    0.476632    0.645128    11.00000    0.32680    0.21471 =
         0.33160   -0.01572   -0.04885   -0.00788
N22   3    0.555193    0.373017    0.754451    11.00000    0.15761    0.12963 =
         0.19439   -0.01863    0.00736   -0.01590
TB1   6    0.469928    0.665658    0.750458    11.00000    0.02318    0.02948 =
         0.03482    0.00283    0.01104    0.00116
FE1   5    0.433292    0.587749    0.881641    11.00000    0.02631    0.03672 =
         0.03324    0.00630    0.01054    0.00046
FE2   5    0.687686    0.598460    0.774012    11.00000    0.02589    0.03143 =
         0.03949    0.00598    0.01236    0.00374
FE3   5    0.200395    0.639095    0.673245    11.00000    0.02345    0.03610 =
         0.03440    0.00332    0.00753   -0.00038
FE4   5    0.453878    0.643568    0.555692    11.00000    0.03237    0.03753 =
         0.03404    0.00394    0.01336    0.00175
N1    3    0.574584    0.624911    0.634619    11.00000    0.03577    0.03219 =
         0.03493    0.00468    0.01774   -0.00127
N2    3    0.613249    0.599494    0.848822    11.00000    0.02296    0.04048 =
         0.03781    0.00686    0.01179    0.00323
N3    3    0.326182    0.595084    0.786537    11.00000    0.03095    0.03422 =
         0.03544    0.00515    0.00940    0.00021
N4    3    0.281346    0.647382    0.602418    11.00000    0.02264    0.04372 =
         0.03812    0.00350    0.01278   -0.00175
N5    3    0.103598    0.630732    0.742179    11.00000    0.02756    0.04756 =
         0.04374    0.00579    0.01670   -0.00249
N6    3    0.362784    0.565683    0.959093    11.00000    0.04361    0.04316 =
         0.04793    0.01196    0.01971    0.00335
N7    3    0.622717    0.539738    0.742412    11.00000    0.04383    0.04204 =
         0.06673   -0.00088    0.01500    0.00395
N8    3    0.407424    0.579984    0.534454    11.00000    0.05554    0.04840 =
         0.05876   -0.00816    0.02294   -0.00811
PART 1
N13   3    0.038295    0.534873    0.539605    10.50000    0.13563    0.14877 =
         0.14408    0.00879   -0.00561   -0.00148
PART 0
O1    4    0.526088    0.638751    0.488185    11.00000    0.04487    0.05390 =
         0.04020    0.00598    0.02102    0.00687
O2    4    0.724296    0.597478    0.683074    11.00000    0.03579    0.04763 =
         0.04324    0.00279    0.01692    0.00627
O3    4    0.569623    0.622890    0.705129    11.00000    0.03366    0.04052 =
         0.03427    0.00359    0.01808    0.00440
O4    4    0.792338    0.572653    0.842937    11.00000    0.03030    0.05157 =
         0.04529    0.01130    0.01473    0.01384
O5    4    0.514039    0.609710    0.823950    11.00000    0.02344    0.03980 =
         0.03767    0.01272    0.00905    0.00588
O6    4    0.569455    0.581701    0.947348    11.00000    0.03228    0.04788 =
         0.03481    0.01061    0.01062   -0.00182
O7    4    0.429279    0.533042    0.853633    11.00000    0.04291    0.03570 =
         0.04772    0.00377    0.01102    0.00083
O8    4    0.319835    0.632893    0.757331    11.00000    0.02730    0.03086 =
         0.03607    0.00682    0.00982   -0.00108
O9    4    0.214185    0.580586    0.680655    11.00000    0.03999    0.04010 =
         0.04393    0.00219    0.00910   -0.00587
O10   4    0.477481    0.702110    0.560833    11.00000    0.05231    0.04401 =
         0.04199    0.00771    0.02155    0.00539
O11   4    0.524455    0.710114    0.679302    11.00000    0.04108    0.04544 =
         0.04580    0.00521    0.01814   -0.00718
O12   4    0.193202    0.695594    0.699098    11.00000    0.03067    0.03537 =
         0.05031    0.00743    0.00927    0.00556
O13   4    0.347385    0.713931    0.718212    11.00000    0.03221    0.03546 =
         0.05920    0.00357    0.01390    0.00298
O14   4    0.447418    0.687027    0.859972    11.00000    0.03725    0.03884 =
         0.04176   -0.00549    0.01914   -0.00166
O15   4    0.392906    0.639700    0.916715    11.00000    0.03962    0.03979 =
         0.04328   -0.00136    0.01711   -0.00385
O16   4    0.629042    0.686643    0.817295    11.00000    0.03280    0.03816 =
         0.04240   -0.00100    0.01284   -0.00030
O17   4    0.752147    0.650646    0.802560    11.00000    0.03073    0.03791 =
         0.05297   -0.00581    0.01455    0.00259
O18   4    0.087495    0.639680    0.592101    11.00000    0.03318    0.06711 =
         0.04363    0.00840    0.00829   -0.00367
O19   4    0.316756    0.652335    0.496257    11.00000    0.03886    0.05451 =
         0.03894    0.00649    0.01142   -0.00023
O20   4    0.383898    0.645112    0.630912    11.00000    0.02543    0.04322 =
         0.03234    0.00322    0.00975    0.00421
C1    1    0.610587    0.622234    0.492082    11.00000    0.03924    0.04185 =
         0.04671   -0.00053    0.02551   -0.00473
C2    1    0.637563    0.617450    0.428833    11.00000    0.05625    0.06464 =
         0.04479    0.00421    0.02717    0.00381
AFIX  43
H2    2    0.596460    0.626898    0.385901    11.00000   -1.20000
AFIX   0
C3    1    0.722311    0.599346    0.428473    11.00000    0.05698    0.07399 =
         0.05714   -0.00226    0.03341   -0.00073
AFIX  43
H3    2    0.737455    0.596263    0.385411    11.00000   -1.20000
AFIX   0
C4    1    0.784875    0.585762    0.490258    11.00000    0.04576    0.06417 =
         0.05823   -0.00906    0.03620    0.00540
AFIX  43
H4    2    0.843283    0.573920    0.489875    11.00000   -1.20000
AFIX   0
C5    1    0.761063    0.589687    0.552915    11.00000    0.03994    0.04560 =
         0.04858   -0.00199    0.02202   -0.00437
AFIX  43
H5    2    0.803622    0.579974    0.595028    11.00000   -1.20000
AFIX   0
C6    1    0.674637    0.607863    0.555826    11.00000    0.03971    0.03967 =
         0.04308   -0.00074    0.02300   -0.00847
C7    1    0.657285    0.610225    0.627363    11.00000    0.02998    0.02861 =
         0.04096    0.00122    0.01562   -0.00809
C8    1    0.807168    0.566096    0.912866    11.00000    0.03003    0.03646 =
         0.04677    0.01191    0.00512    0.00457
C9    1    0.897913    0.551481    0.952515    11.00000    0.03580    0.05046 =
         0.05156    0.01279    0.01133    0.00961
AFIX  43
H9    2    0.945333    0.547382    0.929089    11.00000   -1.20000
AFIX   0
C10   1    0.920169    0.543032    1.022945    11.00000    0.03682    0.06532 =
         0.05932    0.01045   -0.00234    0.01351
AFIX  43
H10   2    0.981621    0.533265    1.046959    11.00000   -1.20000
AFIX   0
C11   1    0.851511    0.548896    1.059548    11.00000    0.04462    0.06564 =
         0.05121    0.01160    0.00066    0.00863
AFIX  43
H11   2    0.866343    0.543453    1.108328    11.00000   -1.20000
AFIX   0
C12   1    0.760477    0.562997    1.022225    11.00000    0.03869    0.05325 =
         0.04633    0.00849    0.01026    0.01037
AFIX  43
H12   2    0.714095    0.566850    1.046671    11.00000   -1.20000
AFIX   0
C13   1    0.735670    0.571670    0.949030    11.00000    0.02920    0.03599 =
         0.04020    0.00640    0.00674    0.00637
C14   1    0.635251    0.585183    0.913260    11.00000    0.02928    0.03382 =
         0.03761    0.00058    0.00862   -0.00087
C15   1    0.354265    0.512479    0.817218    11.00000    0.04774    0.03259 =
         0.05178    0.00377    0.02024   -0.00305
C16   1    0.351584    0.471798    0.828889    11.00000    0.06110    0.03530 =
         0.05529    0.01134    0.01197    0.00103
AFIX  43
H16   2    0.401940    0.460268    0.864409    11.00000   -1.20000
AFIX   0
C17   1    0.278229    0.449388    0.790022    11.00000    0.07064    0.03574 =
         0.07780    0.00335    0.01862   -0.00704
AFIX  43
H17   2    0.279474    0.422754    0.799484    11.00000   -1.20000
AFIX   0
C18   1    0.200905    0.464499    0.736430    11.00000    0.06411    0.04976 =
         0.07945    0.00076    0.00937   -0.01414
AFIX  43
H18   2    0.150356    0.448655    0.710155    11.00000   -1.20000
AFIX   0
C19   1    0.201940    0.503835    0.723683    11.00000    0.05831    0.04494 =
         0.06568   -0.00103    0.00755   -0.01150
AFIX  43
H19   2    0.151091    0.514536    0.687413    11.00000   -1.20000
AFIX   0
C20   1    0.275766    0.528470    0.762647    11.00000    0.04556    0.03569 =
         0.04524   -0.00248    0.01789   -0.00535
C21   1    0.270661    0.570127    0.741213    11.00000    0.02968    0.02985 =
         0.03716    0.00359    0.01421   -0.00400
C22   1    0.072508    0.646084    0.523245    11.00000    0.03102    0.05456 =
         0.04178    0.00307    0.00524   -0.00071
C23   1   -0.023140    0.647249    0.479329    11.00000    0.03570    0.09398 =
         0.04718    0.00639   -0.00088   -0.01097
AFIX  43
H23   2   -0.073991    0.642879    0.499322    11.00000   -1.20000
AFIX   0
C24   1   -0.044451    0.654642    0.407601    11.00000    0.04566    0.12513 =
         0.05876    0.00846   -0.00007   -0.00961
AFIX  43
H24   2   -0.109125    0.654964    0.379231    11.00000   -1.20000
AFIX   0
C25   1    0.029835    0.661627    0.377215    11.00000    0.05644    0.13380 =
         0.05505    0.01298    0.00220   -0.00729
AFIX  43
H25   2    0.015691    0.667575    0.328669    11.00000   -1.20000
AFIX   0
C26   1    0.125183    0.659706    0.419476    11.00000    0.04164    0.11044 =
         0.04860    0.00893    0.01034   -0.01096
AFIX  43
H26   2    0.175041    0.663823    0.398373    11.00000   -1.20000
AFIX   0
C27   1    0.149877    0.651797    0.492938    11.00000    0.03878    0.06410 =
         0.03507    0.00374    0.00512    0.00043
C28   1    0.254406    0.650202    0.532002    11.00000    0.03055    0.04904 =
         0.03779    0.00245    0.00895   -0.00735
C29   1    0.498793    0.723470    0.617446    11.00000    0.03281    0.05010 =
         0.04428    0.00636    0.02101    0.00315
C30   1    0.495245    0.766811    0.606504    11.00000    0.04777    0.04379 =
         0.05291    0.00192    0.02359   -0.00021
C31   1    0.463790    0.782461    0.538741    11.00000    0.07690    0.04491 =
         0.06478    0.00904    0.01980    0.00068
AFIX  43
H31   2    0.448162    0.766062    0.498970    11.00000   -1.20000
AFIX   0
C32   1    0.455160    0.822711    0.529224    11.00000    0.09533    0.05360 =
         0.08190    0.01469    0.01686    0.00350
AFIX  43
H32   2    0.433351    0.833266    0.483337    11.00000   -1.20000
AFIX   0
C33   1    0.478796    0.846279    0.587342    11.00000    0.09975    0.05155 =
         0.09833    0.00688    0.02008    0.00055
AFIX  43
H33   2    0.472359    0.873178    0.581396    11.00000   -1.20000
AFIX   0
C34   1    0.512256    0.830822    0.655134    11.00000    0.10319    0.06303 =
         0.08014   -0.00865    0.02900   -0.00524
AFIX  43
H34   2    0.529091    0.847341    0.694723    11.00000   -1.20000
AFIX   0
C35   1    0.521048    0.791050    0.664896    11.00000    0.07336    0.05025 =
         0.06324   -0.00145    0.02194   -0.00560
AFIX  43
H35   2    0.544366    0.780704    0.710857    11.00000   -1.20000
AFIX   0
C36   1    0.260907    0.721579    0.716035    11.00000    0.02872    0.04002 =
         0.03799    0.01299    0.00858   -0.00208
C37   1    0.233115    0.761589    0.729297    11.00000    0.04168    0.03602 =
         0.04516    0.00348    0.01187    0.00327
C38   1    0.289141    0.792620    0.722646    11.00000    0.04312    0.04208 =
         0.05798   -0.00543    0.01132    0.00296
AFIX  43
H38   2    0.346225    0.788379    0.709893    11.00000   -1.20000
AFIX   0
C39   1    0.263268    0.830084    0.734350    11.00000    0.06145    0.04179 =
         0.06784   -0.00358    0.00631   -0.00268
AFIX  43
H39   2    0.301747    0.851107    0.729002    11.00000   -1.20000
AFIX   0
C40   1    0.178487    0.836017    0.754344    11.00000    0.07184    0.04917 =
         0.06405   -0.01359    0.01192    0.01141
AFIX  43
H40   2    0.159326    0.861204    0.761962    11.00000   -1.20000
AFIX   0
C41   1    0.123877    0.805094    0.762708    11.00000    0.05820    0.05486 =
         0.06332   -0.00597    0.02104    0.01336
AFIX  43
H41   2    0.068226    0.809137    0.777421    11.00000   -1.20000
AFIX   0
C42   1    0.149798    0.767695    0.749672    11.00000    0.04634    0.04463 =
         0.05896   -0.00022    0.02029    0.00727
AFIX  43
H42   2    0.111111    0.746662    0.754629    11.00000   -1.20000
AFIX   0
C43   1    0.398567    0.674828    0.898842    11.00000    0.03491    0.04406 =
         0.03442    0.00000    0.01175   -0.00571
C44   1    0.339602    0.703708    0.927534    11.00000    0.03160    0.04702 =
         0.03212   -0.01117    0.00940   -0.00261
C45   1    0.343872    0.742831    0.913258    11.00000    0.05308    0.04907 =
         0.04922   -0.00779    0.01338    0.00266
AFIX  43
H45   2    0.386885    0.751775    0.888882    11.00000   -1.20000
AFIX   0
C46   1    0.283437    0.769334    0.935393    11.00000    0.06659    0.05578 =
         0.05855   -0.01307    0.01033    0.01179
AFIX  43
H46   2    0.287980    0.795923    0.927259    11.00000   -1.20000
AFIX   0
C47   1    0.218559    0.756046    0.968605    11.00000    0.05595    0.07655 =
         0.06932   -0.02145    0.00605    0.01527
AFIX  43
H47   2    0.176919    0.773562    0.981601    11.00000   -1.20000
AFIX   0
C48   1    0.213440    0.717736    0.983129    11.00000    0.05394    0.08240 =
         0.06249   -0.02251    0.02507   -0.00092
AFIX  43
H48   2    0.168782    0.709148    1.006372    11.00000   -1.20000
AFIX   0
C49   1    0.274981    0.690726    0.963441    11.00000    0.04291    0.05684 =
         0.05119   -0.01209    0.02125   -0.00495
AFIX  43
H49   2    0.272308    0.664406    0.974427    11.00000   -1.20000
AFIX   0
C50   1    0.717676    0.682881    0.817967    11.00000    0.03326    0.04140 =
         0.03298    0.00610    0.01848    0.00429
C51   1    0.785420    0.716166    0.835523    11.00000    0.03994    0.04085 =
         0.04766   -0.00250    0.01787   -0.00717
C52   1    0.756699    0.751562    0.854387    11.00000    0.04569    0.04645 =
         0.06804   -0.01122    0.02605   -0.00079
AFIX  43
H52   2    0.692435    0.755390    0.854801    11.00000   -1.20000
AFIX   0
C53   1    0.823950    0.781907    0.873003    11.00000    0.06343    0.04223 =
         0.07520   -0.01835    0.02384   -0.00742
AFIX  43
H53   2    0.805067    0.805918    0.886916    11.00000   -1.20000
AFIX   0
C54   1    0.918164    0.776401    0.870831    11.00000    0.05750    0.05829 =
         0.07875   -0.00987    0.02372   -0.02232
AFIX  43
H54   2    0.962735    0.796854    0.882530    11.00000   -1.20000
AFIX   0
C55   1    0.946706    0.741119    0.851623    11.00000    0.04487    0.05619 =
         0.06693   -0.00767    0.02128   -0.01354
AFIX  43
H55   2    1.010424    0.737410    0.849818    11.00000   -1.20000
AFIX   0
C56   1    0.880832    0.711299    0.835069    11.00000    0.04255    0.03718 =
         0.06297   -0.00930    0.01748   -0.00414
AFIX  43
H56   2    0.900894    0.687039    0.823162    11.00000   -1.20000
AFIX   0
C57   1    0.268543    0.572068    0.952057    11.00000    0.04543    0.05567 =
         0.05902    0.01452    0.02461   -0.00039
AFIX  43
H57   2    0.233684    0.588467    0.915532    11.00000   -1.20000
AFIX   0
C58   1    0.221209    0.555491    0.996332    11.00000    0.05706    0.06819 =
         0.08826    0.01445    0.03515   -0.00468
AFIX  43
H58   2    0.155513    0.560842    0.990245    11.00000   -1.20000
AFIX   0
C59   1    0.270847    0.531054    1.049498    11.00000    0.07539    0.05642 =
         0.08046    0.01683    0.03942   -0.01078
AFIX  43
H59   2    0.239099    0.519307    1.079624    11.00000   -1.20000
AFIX   0
C60   1    0.368525    0.523832    1.058392    11.00000    0.06823    0.05632 =
         0.06906    0.01946    0.02358   -0.00145
AFIX  43
H60   2    0.404481    0.507738    1.095018    11.00000   -1.20000
AFIX   0
C61   1    0.410481    0.541147    1.011528    11.00000    0.05070    0.05190 =
         0.04808    0.01507    0.02105    0.00696
AFIX  43
H61   2    0.475736    0.535698    1.016044    11.00000   -1.20000
AFIX   0
C62   1    0.026328    0.607646    0.722304    11.00000    0.03689    0.06650 =
         0.05219   -0.00609    0.01642   -0.01144
AFIX  43
H62   2    0.011014    0.596446    0.676885    11.00000   -1.20000
AFIX   0
C63   1   -0.032315    0.599336    0.764893    11.00000    0.04319    0.06975 =
         0.07089   -0.00120    0.02560   -0.01786
AFIX  43
H63   2   -0.085370    0.582583    0.748933    11.00000   -1.20000
AFIX   0
C64   1   -0.011649    0.616007    0.830983    11.00000    0.04142    0.05788 =
         0.06965    0.01093    0.02487    0.00391
AFIX  43
H64   2   -0.051014    0.611395    0.860750    11.00000   -1.20000
AFIX   0
C65   1    0.068076    0.639613    0.852489    11.00000    0.04926    0.06971 =
         0.05161    0.00148    0.02294    0.00299
AFIX  43
H65   2    0.085068    0.650765    0.897984    11.00000   -1.20000
AFIX   0
C66   1    0.123157    0.646861    0.806789    11.00000    0.03460    0.04878 =
         0.04953    0.00279    0.01511   -0.00960
AFIX  43
H66   2    0.176219    0.663704    0.821572    11.00000   -1.20000
AFIX   0
C67   1    0.529978    0.532690    0.723838    11.00000    0.06175    0.05915 =
         0.08594   -0.01727    0.02424   -0.00699
AFIX  43
H67   2    0.488159    0.553690    0.722230    11.00000   -1.20000
AFIX   0
C68   1    0.488413    0.496469    0.706260    11.00000    0.08082    0.06782 =
         0.08940   -0.01645    0.02884   -0.01365
AFIX  43
H68   2    0.420842    0.493566    0.692506    11.00000   -1.20000
AFIX   0
C69   1    0.544685    0.466371    0.709103    11.00000    0.10777    0.07698 =
         0.13563   -0.00421    0.01028   -0.01246
AFIX  43
H69   2    0.517880    0.441741    0.696461    11.00000   -1.20000
AFIX   0
C70   1    0.641395    0.471231    0.730381    11.00000    0.11712    0.07583 =
         0.15346   -0.01462   -0.00420    0.01163
AFIX  43
H70   2    0.683234    0.449959    0.735235    11.00000   -1.20000
AFIX   0
C71   1    0.679109    0.509831    0.745510    11.00000    0.08476    0.06933 =
         0.11773   -0.01041   -0.00239    0.00203
AFIX  43
H71   2    0.746360    0.513628    0.757998    11.00000   -1.20000
AFIX   0
C72   1    0.355291    0.561492    0.567992    11.00000    0.07913    0.06086 =
         0.08346   -0.00816    0.03111   -0.00737
AFIX  43
H72   2    0.342462    0.574441    0.606296    11.00000   -1.20000
AFIX   0
C73   1    0.316886    0.524836    0.553143    11.00000    0.10589    0.07947 =
         0.11312   -0.01266    0.04570   -0.03184
AFIX  43
H73   2    0.279374    0.513934    0.580126    11.00000   -1.20000
AFIX   0
C74   1    0.333630    0.505946    0.501519    11.00000    0.12413    0.09083 =
         0.12337   -0.02794    0.04174   -0.05131
AFIX  43
H74   2    0.307087    0.481227    0.489419    11.00000   -1.20000
AFIX   0
C75   1    0.390235    0.522233    0.464727    11.00000    0.14447    0.09421 =
         0.12363   -0.03650    0.05134   -0.04097
AFIX  43
H75   2    0.407089    0.508423    0.428897    11.00000   -1.20000
AFIX   0
C76   1    0.422752    0.560146    0.481662    11.00000    0.09874    0.07457 =
         0.09281   -0.02115    0.04059   -0.03019
AFIX  43
H76   2    0.457484    0.572081    0.453719    11.00000   -1.20000
AFIX   0
C77   1    0.920161    0.703082    0.628344    11.00000    0.06675    0.05966 =
         0.07715   -0.00524    0.01778   -0.00165
AFIX  43
H77   2    0.968691    0.687989    0.618286    11.00000   -1.20000
AFIX   0
C78   1    0.841396    0.685710    0.643040    11.00000    0.06289    0.06006 =
         0.07228    0.00029    0.01437   -0.00938
AFIX  43
H78   2    0.835806    0.658657    0.642442    11.00000   -1.20000
AFIX   0
C79   1    0.772022    0.708077    0.658378    11.00000    0.05409    0.07022 =
         0.06562    0.00791    0.01744   -0.01178
AFIX  43
H79   2    0.717740    0.696510    0.667193    11.00000   -1.20000
AFIX   0
C80   1    0.781965    0.747133    0.660813    11.00000    0.06037    0.07723 =
         0.07211    0.00183    0.02216    0.00588
AFIX  43
H80   2    0.735101    0.762750    0.671917    11.00000   -1.20000
AFIX   0
C81   1    0.862051    0.763753    0.646735    11.00000    0.07080    0.05428 =
         0.08503    0.00614    0.01507    0.00843
AFIX  43
H81   2    0.870696    0.790665    0.650071    11.00000   -1.20000
AFIX   0
C82   1    0.122267    0.749173    0.548867    11.00000    0.08171    0.07576 =
         0.07542   -0.00044    0.02473    0.00201
AFIX  43
H82   2    0.119623    0.722399    0.555982    11.00000   -1.20000
AFIX   0
C83   1    0.185723    0.765225    0.515956    11.00000    0.10938    0.10796 =
         0.09542   -0.00298    0.04687   -0.00420
AFIX  43
H83   2    0.229327    0.749300    0.501567    11.00000   -1.20000
AFIX   0
C84   1    0.185396    0.803716    0.504352    11.00000    0.10483    0.10158 =
         0.08894    0.02165    0.03692   -0.01311
AFIX  43
H84   2    0.227405    0.814179    0.480505    11.00000   -1.20000
AFIX   0
C85   1    0.124546    0.827755    0.526915    11.00000    0.09227    0.08729 =
         0.09384    0.03201    0.00973   -0.00585
AFIX  43
H85   2    0.124650    0.854566    0.519444    11.00000   -1.20000
AFIX   0
C86   1    0.062174    0.810838    0.561546    11.00000    0.07093    0.07612 =
         0.07660    0.01353    0.00475    0.00334
AFIX  43
H86   2    0.019172    0.825832    0.578380    11.00000   -1.20000
AFIX   0
C87   1    0.568259    0.379197    0.824951    11.00000    0.16099    0.13327 =
         0.18713   -0.01740   -0.00046   -0.01249
AFIX  43
H87   2    0.513977    0.387187    0.838540    11.00000   -1.20000
AFIX   0
C88   1    0.646363    0.375194    0.873638    11.00000    0.16853    0.13824 =
         0.20775   -0.01822   -0.00180   -0.00044
AFIX  43
H88   2    0.648550    0.378045    0.921599    11.00000   -1.20000
AFIX   0
C89   1    0.732644    0.366072    0.853499    11.00000    0.16992    0.15138 =
         0.21259   -0.02355   -0.00343    0.00173
AFIX  43
H89   2    0.793718    0.364053    0.887091    11.00000   -1.20000
AFIX   0
C90   1    0.719919    0.360657    0.783560    11.00000    0.18983    0.15861 =
         0.21833   -0.02269   -0.00556    0.01161
AFIX  43
H90   2    0.775222    0.354328    0.769822    11.00000   -1.20000
AFIX   0
C91   1    0.638080    0.363319    0.732583    11.00000    0.16070    0.12773 =
         0.20280   -0.02818    0.00311    0.00194
AFIX  43
H91   2    0.634491    0.359086    0.684689    11.00000   -1.20000
AFIX   0
C92   1    0.866473    0.437671    0.650917    11.00000    0.32476    0.20248 =
         0.32040   -0.01616   -0.04647   -0.00026
AFIX  43
H92   2    0.841065    0.422683    0.609924    11.00000   -1.20000
AFIX   0
C93   1    0.881685    0.421415    0.717772    11.00000    0.29953    0.19451 =
         0.29222   -0.01252   -0.04239    0.00930
AFIX  43
H93   2    0.866326    0.395306    0.721902    11.00000   -1.20000
AFIX   0
C94   1    0.919147    0.443216    0.778258    11.00000    0.31152    0.19764 =
         0.30902   -0.01666   -0.05345    0.00208
AFIX  43
H94   2    0.929135    0.431933    0.823265    11.00000   -1.20000
AFIX   0
C95   1    0.942015    0.481719    0.772621    11.00000    0.27547    0.18615 =
         0.28294   -0.01148   -0.04286   -0.00043
AFIX  43
H95   2    0.968294    0.496472    0.813789    11.00000   -1.20000
AFIX   0
C96   1    0.926102    0.498478    0.706183    11.00000    0.30758    0.20455 =
         0.30561   -0.02739   -0.04395   -0.00901
AFIX  43
H96   2    0.940262    0.524753    0.702469    11.00000   -1.20000
AFIX   0
C97   1    0.045942    0.532526    0.470762    11.00000    0.17439    0.17244 =
         0.16968   -0.01700   -0.01049    0.00161
AFIX  43
H97   2    0.068111    0.552869    0.447920    11.00000   -1.20000
PART 2
AFIX   0
C98   1    0.038295    0.534873    0.539605    10.50000    0.13563    0.14877 =
         0.14408    0.00879   -0.00561   -0.00148
AFIX  43
H98   2    0.068281    0.555175    0.569655    10.50000   -1.20000
PART 0
AFIX   0
C99   1   -0.014289    0.506819    0.563675    11.00000    0.15292    0.15508 =
         0.18532   -0.00414   -0.02153   -0.02565
AFIX  43
H99   2   -0.031919    0.512649    0.604938    11.00000   -1.20000
AFIX   0
hklf 4

REM  170616g in P2(1)/n
REM R1 =  0.0668 for   10686 Fo > 4sig(Fo)  and  0.1146 for all   16064 data
REM   1225 parameters refined using   4045 restraints

END

WGHT      0.0255     71.0531

REM Highest difference peak  1.031,  deepest hole -1.458,  1-sigma level  0.125
Q1    1   0.2393  0.7150  0.5400  11.00000  0.05    1.03
Q2    1   0.4350  0.7455  0.8815  11.00000  0.05    0.91
Q3    1   0.7009  0.6154  0.9605  11.00000  0.05    0.80
Q4    1   0.4376  0.6378  0.7605  11.00000  0.05    0.78
Q5    1   0.2170  0.6563  0.8617  11.00000  0.05    0.78
Q6    1   0.4965  0.6982  0.7392  11.00000  0.05    0.76
Q7    1   0.5051  0.7447  0.6174  11.00000  0.05    0.74
Q8    1   0.7254  0.6735  0.6375  11.00000  0.05    0.73
Q9    1   0.0407  0.7754  0.5715  11.00000  0.05    0.72
Q10   1   0.9452  0.7360  0.6254  11.00000  0.05    0.69
Q11   1   0.4812  0.6884  0.9455  11.00000  0.05    0.69
Q12   1   0.4602  0.6683  0.7992  11.00000  0.05    0.66
Q13   1   0.0000  0.5000  0.5000  10.50000  0.05    0.66
Q14   1   0.3543  0.4800  1.0963  11.00000  0.05    0.66
Q15   1   0.6810  0.7299  0.7765  11.00000  0.05    0.64
Q16   1   0.4177  0.5669  0.6894  11.00000  0.05    0.64
Q17   1   0.4337  0.6944  0.7633  11.00000  0.05    0.64
Q18   1   0.7429  0.6396  0.8324  11.00000  0.05    0.61
Q19   1   0.5391  0.6512  0.7456  11.00000  0.05    0.59
Q20   1   0.7589  0.7283  0.6569  11.00000  0.05    0.59
;
_shelx_res_checksum   22760

_shelx_hkl_file
;
   2   0   0  121.71    6.52
   2   0   0  122.77    5.99
   3   0   0    1.56    3.66
   3   0   0   -0.97    4.03
   4   0   0 2452.48   53.25
   4   0   0 2443.47   49.98
   5   0   0   -3.15    4.91
   6   0   0   13.28    8.01
   7   0   0   -4.71    7.16
   8   0   0  453.88   25.31
   9   0   0  -10.09    8.66
  10   0   0   25.50   13.34
  11   0   0  -10.51   10.66
  12   0   0  481.33   32.52
  13   0   0    9.48   15.25
  14   0   0   49.07   20.44
  15   0   0    0.65   16.69
  16   0   0   39.93   21.02
  17   0   0  -12.91   15.89
  18   0   0   98.68   29.39
  18  -1   0   31.09   23.72
  17  -1   0  -12.28   20.06
  16  -1   0   47.67   23.55
  15  -1   0   54.04   20.93
  14  -1   0  117.09   24.85
  13  -1   0  -10.06   14.28
  12  -1   0    5.23   13.25
  11  -1   0   92.28   20.38
  10  -1   0  298.27   23.44
   9  -1   0  289.88   21.68
   8  -1   0 1024.95   38.32
   7  -1   0    7.59    8.72
   6  -1   0 1486.09   42.24
   5  -1   0   14.13    6.78
   4  -1   0 2509.39   54.14
   3  -1   0  580.09   18.30
   2  -1   0  537.65   14.75
   2   1   0  517.77   14.79
   3   1   0  569.61   16.21
   3   1   0  585.06   18.67
   4   1   0 2482.31   53.46
   4   1   0 2391.61   49.08
   5   1   0   14.02    6.10
   5   1   0   14.08    6.45
   6   1   0 1456.36   42.09
   7   1   0   -2.77    7.53
  -8  -1   0 1014.48   30.39
   8   1   0 1021.31   38.40
   9   1   0  313.00   22.48
  -9  -1   0  269.68   16.05
  10   1   0  341.95   24.79
  11   1   0   60.41   18.33
  12   1   0   10.51   14.93
  13   1   0   -3.41   14.04
  14   1   0  136.00   26.06
  15   1   0   66.05   24.09
  16   1   0   46.97   23.36
  17   1   0    0.13   20.30
  18   1   0    2.92   22.64
  18  -2   0    1.75   21.67
  17  -2   0   -3.50   17.48
  16  -2   0   55.87   24.64
  15  -2   0   -3.68   17.32
  14  -2   0   79.73   22.40
  13  -2   0   -3.26   14.24
  12  -2   0   90.49   19.88
  11  -2   0  157.49   23.98
  10  -2   0   38.81   14.78
   9  -2   0  133.18   18.41
   8  -2   0   75.80   14.86
   7  -2   0  816.89   31.55
   6  -2   0  222.50   15.32
   5  -2   0 1325.31   36.59
   4  -2   0 1179.01   31.53
   3  -2   0 3454.72   66.13
   2  -2   0  469.96   13.59
   2   2   0  474.79   14.26
   3   2   0 3475.47   66.33
   3   2   0 3366.02   60.93
  -3  -2   0 3365.38   62.56
   4   2   0 1168.39   28.02
   4   2   0 1138.84   31.63
  -4  -2   0 1147.34   26.43
   5   2   0 1319.04   32.96
  -5  -2   0 1321.07   30.58
   5   2   0 1265.09   36.59
   6   2   0  238.23   16.21
  -6  -2   0  218.34   11.52
   6   2   0  236.61   13.97
   7   2   0  789.38   31.64
  -7  -2   0  848.02   25.17
   8   2   0   63.85   14.44
  -8  -2   0   78.98   11.12
   9   2   0  126.80   18.21
  -9  -2   0  107.21   11.14
  10   2   0   35.56   14.02
  11   2   0  128.64   22.11
  12   2   0   86.82   21.78
  13   2   0    4.40   14.86
  14   2   0   78.87   21.27
  15   2   0   17.83   16.78
  16   2   0   43.25   20.61
  17   2   0   -7.45   18.47
  18   2   0   -4.02   19.32
  18  -3   0   -9.44   18.64
  17  -3   0   -7.15   19.42
  16  -3   0   18.58   18.55
  15  -3   0  286.43   30.70
  14  -3   0   15.24   16.16
  13  -3   0  235.67   25.61
  12  -3   0  107.15   21.80
  11  -3   0  182.31   23.84
  10  -3   0    5.69   10.82
   9  -3   0  159.08   15.95
   8  -3   0   10.60   10.41
   7  -3   0   53.29   11.61
   6  -3   0   -6.59    4.42
   5  -3   0  197.59   13.12
   4  -3   0  513.31   19.12
   3  -3   0  824.95   22.79
  -2   3   0   99.08    6.03
   1   3   0 3785.15   67.34
   2   3   0  100.43    6.27
  -3  -3   0  794.60   19.10
   3   3   0  838.31   23.60
   3   3   0  802.76   19.40
   4   3   0  476.60   18.98
  -4  -3   0  503.65   14.93
   4   3   0  515.89   16.28
   5   3   0  214.93   14.16
  -5  -3   0  197.37    9.79
   5   3   0  200.52   11.53
   6   3   0   -6.19    5.99
   6   3   0   -0.15    5.43
  -6  -3   0   -9.23    3.87
   7   3   0   42.87   11.41
  -7  -3   0   33.70    8.25
   7   3   0   35.68    8.94
  -8  -3   0   -4.92    6.29
   8   3   0    9.41    9.83
   9   3   0  176.27   18.34
  -9  -3   0  155.82   12.20
  10   3   0  -10.70    7.89
  11   3   0  213.04   26.90
  12   3   0   90.93   21.60
  13   3   0  212.20   28.69
  14   3   0    5.79   15.30
  15   3   0  315.73   31.30
  16   3   0    0.70   20.28
  17   3   0   17.62   22.43
  18   3   0  -10.60   20.69
  17  -4   0   12.11   18.46
  16  -4   0   27.71   21.85
  15  -4   0    6.18   16.23
  14  -4   0  228.73   31.67
  13  -4   0  186.02   27.65
  12  -4   0  199.10   26.93
  11  -4   0  658.87   36.02
  10  -4   0   12.98   12.34
   9  -4   0  208.17   18.73
   8  -4   0  497.09   26.40
   7  -4   0 1472.38   44.68
   6  -4   0    4.16    6.94
   5  -4   0   89.76    9.73
   4  -4   0  243.19   13.06
  -2   4   0  866.92   21.12
  -1   4   0  403.39   11.22
  -1  -4   0  383.86   10.68
   1   4   0  386.22   11.47
   2   4   0  879.94   22.40
  -2  -4   0  856.46   19.73
   3   4   0  112.46    8.95
  -3  -4   0  114.06    6.38
   3   4   0  115.84    6.40
  -4  -4   0  240.51    9.87
   4   4   0  220.47   12.99
   4   4   0  232.29   10.52
  -5  -4   0   79.28    6.64
   5   4   0   79.61   11.01
   5   4   0   71.30    7.59
   6   4   0    4.08    6.05
   6   4   0   -2.44    5.25
  -6  -4   0    1.02    4.64
   7   4   0 1303.65   42.84
  -7  -4   0 1331.83   33.56
   7   4   0 1375.48   37.94
  -8  -4   0  435.93   18.26
   8   4   0  461.72   25.11
   9   4   0  192.36   17.70
  -9  -4   0  216.49   13.19
  10   4   0   35.76   14.46
  11   4   0  624.60   35.74
  12   4   0  184.62   27.08
  13   4   0  191.86   28.28
  14   4   0  180.78   29.16
  15   4   0   37.87   20.17
  16   4   0   15.31   17.99
  17   4   0    3.80   19.92
  18   4   0   37.94   25.60
  16  -5   0   80.07   23.96
  15  -5   0   80.44   23.08
  14  -5   0   39.35   19.28
  13  -5   0   36.39   18.55
  12  -5   0  197.23   26.90
  11  -5   0  153.29   23.37
  10  -5   0  791.20   37.02
   9  -5   0   76.01   15.58
   8  -5   0 1745.23   52.27
   7  -5   0  741.30   30.07
   6  -5   0  948.77   32.30
   5  -5   0  110.46   10.66
  -3   5   0  322.16   13.29
  -2   5   0  991.02   23.71
  -1   5   0   14.33    3.32
   1   5   0   10.52    3.21
  -1  -5   0    5.22    2.48
  -2  -5   0  997.15   22.77
   2   5   0  982.83   25.06
  -3  -5   0  314.88   11.03
   3   5   0  319.79   14.31
   3   5   0  304.49   10.32
   4   5   0  969.12   23.66
  -4  -5   0  929.86   23.26
   4   5   0  956.75   28.79
   5   5   0  107.84    8.50
  -5  -5   0  108.95    7.47
   5   5   0  117.87   11.28
  -6  -5   0  903.58   24.77
   6   5   0  913.42   32.59
   6   5   0  911.75   27.35
   7   5   0  729.38   26.07
  -7  -5   0  701.92   22.26
   7   5   0  706.97   30.56
   8   5   0 1596.80   44.20
   8   5   0 1595.01   51.03
  -8  -5   0 1606.45   39.34
  -9  -5   0   84.18   10.83
   9   5   0   51.33   14.22
  10   5   0  777.25   37.68
  11   5   0  163.07   24.42
  12   5   0  219.36   24.48
  13   5   0   41.93   19.19
  14   5   0   44.23   19.13
  15   5   0  161.32   29.51
  16   5   0  107.46   27.46
  17   5   0  129.35   29.58
  18   5   0    0.03   21.70
 -17   6   0  138.42  179.25
  15  -6   0   41.56   21.26
  14  -6   0  393.60   32.78
  13  -6   0   48.69   18.85
  12  -6   0  491.58   32.68
  11  -6   0  142.24   22.48
  10  -6   0   68.72   16.92
   9  -6   0   52.87   14.02
   8  -6   0  105.26   15.95
   7  -6   0   -1.91    7.69
   6  -6   0  740.42   27.86
  -5   6   0   30.15    8.12
  -4   6   0  261.22   13.49
  -3   6   0   13.54    5.03
  -2   6   0 5760.12  101.56
  -1   6   0  552.43   15.57
   0   6   0  901.24   20.98
   1   6   0  561.17   16.15
   2   6   0 5598.84  100.35
   2   6   0 5528.90   92.64
  -2  -6   0 5539.31   99.22
   3   6   0   11.93    5.43
  -3  -6   0   27.36    4.76
   3   6   0   26.07    4.26
   4   6   0  242.62   14.08
   4   6   0  248.79   10.43
  -4  -6   0  260.53   10.78
   5   6   0   30.32    8.30
  -5  -6   0   37.40    6.22
   5   6   0   34.84    6.52
   6   6   0  711.48   23.31
   6   6   0  661.97   27.75
  -6  -6   0  698.04   21.07
   7   6   0   -1.59    6.38
   7   6   0    2.07    8.24
  -7  -6   0    5.31    5.79
   8   6   0  103.27   13.74
  -8  -6   0   88.27   10.87
   8   6   0   78.59   15.29
  -9  -6   0   54.46    8.97
   9   6   0   33.62   13.25
  10   6   0   75.19   17.45
  11   6   0   90.92   20.54
  12   6   0  424.04   31.50
  13   6   0   96.44   23.09
  14   6   0  370.90   32.36
  15   6   0   63.88   23.32
  16   6   0  257.21   35.47
  17   6   0   13.18   22.00
  18   6   0   58.39   26.87
 -17   7   0   53.52  134.12
 -16   7   0   75.57   76.46
 -15   7   0  590.64   87.60
  13  -7   0  194.96   28.07
  12  -7   0  370.37   28.34
  11  -7   0  196.65   22.08
  10  -7   0  273.55   23.33
   9  -7   0   -2.08    9.93
   8  -7   0  213.86   18.15
  -6   7   0 1134.63   35.78
  -5   7   0  288.09   15.88
  -4   7   0    3.47    4.74
  -3   7   0  117.86    8.62
  -2   7   0 1907.06   40.44
  -1   7   0   48.92    5.57
   1   7   0   40.30    4.07
   1   7   0   45.44    5.07
  -2  -7   0 1792.74   38.07
   2   7   0 1780.71   40.16
   2   7   0 1806.95   33.81
   3   7   0  109.80    9.41
   3   7   0  116.48    6.41
  -3  -7   0  116.44    7.56
   4   7   0    5.89    3.70
  -4  -7   0    6.87    3.93
   4   7   0    1.88    5.02
   5   7   0  286.51   12.74
  -5  -7   0  293.52   12.70
   5   7   0  294.96   17.29
  -6  -7   0 1054.07   28.37
   6   7   0 1117.27   30.31
   6   7   0 1111.70   37.18
   7   7   0    7.17    7.49
  -7  -7   0   15.81    6.92
   7   7   0   28.22   10.14
   8   7   0  189.60   14.79
  -8  -7   0  164.29   11.76
   8   7   0  197.23   18.49
   9   7   0   -7.43    7.94
  -9  -7   0   10.97    6.72
   9   7   0    3.99    8.38
  10   7   0  268.22   23.39
  11   7   0  184.02   25.61
  12   7   0  311.86   28.47
  13   7   0  203.27   28.27
  14   7   0  105.80   25.12
  15   7   0  207.72   32.95
  16   7   0   17.63   20.93
  17   7   0   37.20   22.59
  18   7   0   -1.48   22.71
 -17   8   0  -68.59   96.19
 -16   8   0  163.31   67.98
 -15   8   0   28.95   43.38
 -14   8   0  -13.44   32.55
 -13   8   0   39.82   29.39
 -12   8   0   66.65   23.88
  -9   8   0  167.49   21.76
  -8   8   0   95.39   16.23
  -7   8   0 1097.74   37.61
  -6   8   0   25.18    9.08
  -5   8   0 1198.58   34.76
  -4   8   0  118.46    9.87
  -3   8   0  415.38   16.27
  -2   8   0    5.69    4.43
  -1   8   0 6105.06  107.80
   0   8   0  352.32   13.00
   1   8   0 6033.10  108.60
   1   8   0 6219.95  102.15
   2   8   0    2.65    3.06
  -2  -8   0    1.41    3.66
   2   8   0    8.73    4.91
  -3  -8   0  378.65   13.90
   3   8   0  380.15   16.77
   3   8   0  360.95   11.54
  -4  -8   0  113.50    7.98
   4   8   0  103.52   10.38
   4   8   0  113.28    7.22
   5   8   0 1170.95   36.73
  -5  -8   0 1153.25   29.50
   5   8   0 1151.42   28.66
  -6  -8   0   10.11    5.86
   6   8   0    9.37    6.21
   6   8   0   16.56    8.89
   7   8   0 1053.30   31.43
  -7  -8   0 1002.24   28.76
   7   8   0 1065.02   38.79
   8   8   0  100.89   13.63
   8   8   0   70.73   15.21
  -8  -8   0   99.46   11.13
  -9  -8   0  126.51   10.86
   9   8   0  117.47   19.20
   9   8   0  132.63   13.84
  10   8   0   38.69   15.13
  11   8   0  989.45   46.00
  12   8   0   39.27   18.53
  13   8   0   53.79   20.61
  14   8   0   16.03   18.29
  15   8   0   20.11   19.34
  16   8   0   53.51   24.51
  17   8   0    7.00   19.31
 -17   9   0  396.31  100.45
 -16   9   0  207.97   60.66
 -15   9   0  410.73   61.23
 -14   9   0  -36.89   27.70
 -13   9   0  303.47   43.00
 -12   9   0   58.95   23.92
 -11   9   0  414.86   32.75
 -10   9   0   76.75   19.32
  -9   9   0   68.28   15.10
  -8   9   0  154.22   19.31
  -7   9   0   -3.08    7.98
  -6   9   0   14.55    8.08
  -5   9   0  107.69   11.01
  -4   9   0   92.66    9.14
  -3   9   0 3572.38   70.77
  -2   9   0   33.51    6.46
  -1   9   0   13.12    4.99
   1   9   0   11.21    3.87
   1   9   0   24.66    5.72
   2   9   0   29.51    5.85
   2   9   0   30.66    4.89
  -3  -9   0 3288.94   64.64
   3   9   0 3150.29   67.97
   3   9   0 3308.70   58.61
   4   9   0   83.15   11.42
  -4  -9   0   83.63    7.69
   4   9   0   87.34    6.64
   5   9   0   94.00    7.90
   5   9   0   76.29   12.26
  -5  -9   0  107.36    8.59
   6   9   0   10.31    8.29
   6   9   0   10.20    5.97
  -6  -9   0   10.92    6.15
  -7  -9   0   -7.02    5.77
   7   9   0    3.12    6.65
   7   9   0    2.18    8.16
   8   9   0  127.32   12.30
  -8  -9   0  122.53   10.59
   8   9   0   92.71   17.06
  -9  -9   0   75.76   10.72
   9   9   0   56.29   15.42
   9   9   0   54.51   12.05
  10   9   0   71.40   14.04
  10   9   0   44.97   16.16
  11   9   0  368.77   29.25
  12   9   0   28.47   16.46
  13   9   0  224.24   30.92
  14   9   0    9.29   17.87
  15   9   0  206.11   33.09
  16   9   0   83.21   25.18
  17   9   0  105.28   29.92
 -17  10   0  -15.65   68.85
 -16  10   0  255.12   65.13
 -15  10   0   80.69   39.66
 -14  10   0   78.73   35.95
 -13  10   0  145.22   33.73
 -12  10   0  276.57   35.68
 -11  10   0  117.79   24.70
 -10  10   0  124.78   23.05
  -9  10   0  541.12   29.48
  -8  10   0  106.43   16.77
  -7  10   0  504.86   25.19
  -6  10   0  359.76   19.87
  -5  10   0  901.39   30.08
  -4  10   0  138.34   11.28
  -3  10   0 1032.44   29.10
  -2  10   0  338.81   14.66
  -1  10   0  828.67   23.55
   0  10   0 1954.75   42.54
   1  10   0  829.27   20.41
   1  10   0  840.63   24.18
   2  10   0  297.38   14.55
   2  10   0  315.28   11.07
   3  10   0  958.57   22.56
   3  10   0  924.46   29.32
  -3 -10   0  948.58   26.35
   4  10   0  135.48    8.13
   4  10   0  133.02   12.10
   5  10   0  876.74   23.98
   5  10   0  921.96   32.80
  -5 -10   0  871.98   25.74
   6  10   0  322.62   14.91
  -6 -10   0  313.99   15.01
   6  10   0  335.74   20.91
   7  10   0  442.32   19.16
  -7 -10   0  444.94   18.27
   7  10   0  450.26   25.39
   8  10   0   87.06   16.57
   8  10   0   95.53   12.81
  -8 -10   0   97.24   10.18
   9  10   0  459.52   28.79
   9  10   0  475.22   23.23
  -9 -10   0  471.59   19.95
  10  10   0   69.93   14.80
  10  10   0   88.52   19.31
  11  10   0   82.81   20.30
  12  10   0  145.28   26.53
  13  10   0   78.93   22.61
  14  10   0   62.54   22.77
  15  10   0   44.25   22.06
  16  10   0   88.62   26.77
  17  10   0  -12.12   21.37
 -17  11   0  -45.34   57.43
 -16  11   0   72.24   48.93
 -15  11   0   24.40   34.28
 -14  11   0   -7.81   26.33
 -13  11   0   44.24   25.08
 -12  11   0  349.85   32.37
 -11  11   0   38.57   18.05
 -10  11   0  332.65   26.42
  -9  11   0   10.40   11.28
  -8  11   0  648.91   30.34
  -7  11   0  213.86   17.46
  -6  11   0 1300.06   40.06
  -5  11   0  118.75   11.89
  -4  11   0  799.13   26.62
  -3  11   0   59.17    8.88
  -2  11   0  648.56   21.56
  -1  11   0  655.64   21.10
   1  11   0  673.26   18.60
   1  11   0  708.34   22.38
   2  11   0  606.86   16.79
   2  11   0  589.52   21.56
   3  11   0   43.46    8.78
   3  11   0   54.71    6.74
   4  11   0  693.93   19.99
   4  11   0  735.82   28.03
  -4 -11   0  863.89   24.91
   5  11   0   91.04    8.16
  -5 -11   0  105.11    9.33
   5  11   0   84.05   13.53
  -6 -11   0 1185.85   32.64
   6  11   0 1209.66   41.22
   6  11   0 1194.98   31.30
   7  11   0  194.69   13.32
  -7 -11   0  193.03   12.73
   7  11   0  212.76   18.74
   8  11   0  557.68   30.29
   8  11   0  534.18   22.71
  -8 -11   0  546.00   21.27
   9  11   0   -7.32    9.50
   9  11   0    8.50    8.77
  10  11   0  314.40   25.88
  11  11   0   38.26   17.67
  12  11   0  269.77   27.42
  13  11   0    6.96   15.80
  14  11   0    1.02   15.37
  15  11   0   18.80   19.01
  16  11   0   -4.76   20.39
  17  11   0    1.84   22.32
 -17  12   0  -41.14   40.85
 -16  12   0  114.04   45.09
 -15  12   0    8.85   33.65
 -14  12   0  130.48   35.91
 -13  12   0   14.06   19.96
 -12  12   0   92.59   22.35
 -11  12   0  139.19   25.93
 -10  12   0  228.40   26.81
  -9  12   0   25.95   12.98
  -8  12   0    8.33    9.72
  -7  12   0   43.38   12.18
  -6  12   0    6.02    8.62
  -5  12   0  216.80   15.09
  -4  12   0 1187.25   34.82
  -3  12   0  138.12   10.96
  -2  12   0   97.49    9.02
  -1  12   0 2352.39   51.32
   0  12   0  550.87   17.98
   0  12   0  575.67   20.00
   1  12   0 2292.24   45.61
   1  12   0 2305.68   51.13
   2  12   0   94.00    7.22
   2  12   0   79.55    8.27
   3  12   0  117.75   11.40
   3  12   0  129.23    8.07
   4  12   0 1028.50   34.45
  -4 -12   0 1054.75   29.89
   4  12   0 1024.61   25.47
   5  12   0  187.11   10.61
   5  12   0  177.66   15.77
  -5 -12   0  185.93   12.10
   6  12   0   12.17    7.75
   6  12   0    5.76    6.27
  -6 -12   0    6.65    7.17
  -7 -12   0   46.42    9.73
   7  12   0   17.34   11.68
   7  12   0   63.19   10.03
  -8 -12   0   -3.44    6.17
   8  12   0   15.47    8.05
   8  12   0   10.76   10.38
   9  12   0   19.21    9.81
   9  12   0   21.31   12.85
  10  12   0  162.12   24.00
  11  12   0  126.27   24.03
  12  12   0   36.57   19.65
  13  12   0   -5.59   16.61
  14  12   0  108.77   26.42
  15  12   0  -16.34   18.00
  16  12   0   15.32   21.85
  17  12   0  -12.95   18.94
 -17  13   0  -10.12   52.26
 -16  13   0   69.87   39.28
 -15  13   0  169.56   43.32
 -14  13   0   47.53   27.16
 -13  13   0    8.79   20.01
 -12  13   0   39.03   19.78
 -11  13   0   26.53   18.26
 -10  13   0   54.82   19.00
  -9  13   0  126.44   18.00
  -8  13   0  123.25   16.99
  -7  13   0   18.90   10.87
  -6  13   0  608.45   26.78
  -5  13   0    0.81    7.08
  -4  13   0 1988.67   49.36
  -3  13   0  511.54   21.24
  -2  13   0   59.24    8.84
  -1  13   0   46.13    8.27
   0  13   0    5.49    4.89
   0  13   0    9.79    5.22
   2  13   0   68.80   10.19
   2  13   0   68.18    7.71
   3  13   0  431.25   20.70
   3  13   0  440.93   15.06
   4  13   0 1720.13   48.21
   4  13   0 1798.82   38.31
   5  13   0    5.60    5.06
  -5 -13   0    4.56    5.40
   5  13   0   -7.46    7.21
   6  13   0  553.13   28.12
  -6 -13   0  564.71   21.76
   6  13   0  548.39   19.75
   7  13   0   16.13   10.67
  -7 -13   0   24.71    8.31
   7  13   0   11.51    7.16
   8  13   0  105.95   18.22
   8  13   0  115.69   11.75
  -8 -13   0  107.66   11.21
   9  13   0  110.38   19.86
  10  13   0   38.13   16.63
  11  13   0   13.67   16.56
  12  13   0   26.11   17.50
  13  13   0   11.93   17.41
  14  13   0   23.22   20.72
  15  13   0   56.01   25.20
  16  13   0   36.18   23.76
  17  13   0  -21.50   21.68
 -17  14   0  -69.32   40.72
 -16  14   0  -32.06   31.98
 -15  14   0   64.27   34.39
 -14  14   0   41.84   23.56
 -13  14   0   34.69   22.82
 -12  14   0   -5.04   15.87
 -11  14   0   21.98   18.09
 -10  14   0  -13.08   14.55
  -9  14   0  425.92   26.73
  -8  14   0   34.50   12.62
  -7  14   0  138.21   15.35
  -6  14   0  152.10   14.95
  -5  14   0  458.36   22.34
  -4  14   0    8.81    7.17
  -3  14   0 1851.64   46.64
  -2  14   0  328.49   16.53
  -1  14   0   -1.91    4.93
   0  14   0  616.48   20.74
   0  14   0  635.99   22.66
   1  14   0    7.31    5.10
   1  14   0   42.77    8.75
   2  14   0  312.96   17.26
   2  14   0  326.81   13.17
   3  14   0 1716.04   37.14
   3  14   0 1654.08   45.94
   4  14   0    3.01    7.90
   4  14   0   13.30    5.68
   5  14   0  394.16   22.58
   5  14   0  377.59   15.33
  -5 -14   0  407.52   18.47
   6  14   0  134.06   10.48
  -6 -14   0  150.81   12.30
   6  14   0  143.38   16.20
   7  14   0  125.35   11.05
  -7 -14   0  128.10   11.65
   7  14   0  130.01   19.59
  -8 -14   0   40.06   10.09
   8  14   0   24.06    8.63
   8  14   0   27.12   13.40
   9  14   0  374.86   27.48
  10  14   0   14.93   13.84
  11  14   0   16.63   15.97
  12  14   0    5.54   16.63
  13  14   0   41.16   20.01
  14  14   0   50.90   21.60
  15  14   0   15.39   20.51
  16  14   0   18.33   20.73
  17  14   0    1.07   24.43
 -17  15   0  179.93   50.84
 -16  15   0   20.66   36.07
 -15  15   0   -0.14   23.36
 -14  15   0   -9.07   19.83
 -13  15   0  321.22   38.43
 -12  15   0    1.63   17.06
 -11  15   0   -0.13   15.40
 -10  15   0   27.72   16.97
  -9  15   0   24.73   12.79
  -8  15   0   -2.88    9.83
  -7  15   0  128.73   17.41
  -6  15   0   74.20   13.84
  -5  15   0 1097.44   36.22
  -4  15   0   19.62    8.88
  -3  15   0  298.62   16.95
  -2  15   0  607.21   23.38
  -1  15   0  984.29   30.47
   1  15   0  972.26   26.19
   1  15   0  946.43   30.41
   2  15   0  576.20   18.67
   2  15   0  563.21   23.96
   3  15   0  221.14   16.12
   3  15   0  242.66   12.19
   4  15   0   22.78    6.47
   4  15   0   23.48    9.81
   5  15   0  861.18   24.96
   5  15   0  898.91   35.31
   6  15   0   68.14    9.80
   6  15   0   54.16   13.58
  -6 -15   0   58.88   10.16
   7  15   0  112.30   10.61
  -7 -15   0  118.19   11.51
   7  15   0  124.54   19.24
  -8 -15   0   -9.69    6.65
   8  15   0   -2.81    9.93
   9  15   0   18.17   12.86
  11  15   0   -7.69   14.46
  12  15   0   12.24   18.02
  13  15   0  141.43   28.41
  14  15   0  -19.16   14.59
  15  15   0   -9.03   17.84
  16  15   0    1.82   20.50
  17  15   0   89.29   28.94
 -17  16   0  -12.57   42.03
 -16  16   0    1.39   25.97
 -15  16   0   11.83   24.87
 -14  16   0  113.27   30.48
 -13  16   0  256.93   34.84
 -12  16   0   21.29   17.85
 -11  16   0   95.44   22.60
 -10  16   0    4.89   14.85
  -9  16   0  628.16   32.72
  -8  16   0   72.45   16.23
  -7  16   0   50.45   12.89
  -6  16   0  111.02   15.93
  -5  16   0  168.59   15.10
  -4  16   0  569.61   24.84
  -3  16   0    0.10    7.02
  -2  16   0  288.74   16.61
  -1  16   0 2916.90   64.77
   0  16   0 2065.81   50.62
   0  16   0 2132.74   48.08
   1  16   0 2871.61   57.82
   1  16   0 2814.79   64.28
   2  16   0  285.58   17.53
   2  16   0  288.73   13.52
   3  16   0   -4.31    4.82
   3  16   0   -7.67    6.19
   4  16   0  506.02   18.13
   5  16   0  131.54   10.44
   5  16   0  148.16   15.85
   6  16   0  107.29   11.75
   6  16   0  104.51   17.42
  -7 -16   0   37.84    9.66
   7  16   0   27.84    8.85
   7  16   0    2.62   10.98
   8  16   0   36.32   14.46
  -8 -16   0   58.97   11.50
   9  16   0  531.78   33.10
  10  16   0   -4.83   13.55
  11  16   0   54.00   21.02
  12  16   0   30.10   18.18
  13  16   0  213.28   32.63
  14  16   0   84.13   25.06
  15  16   0   11.49   18.94
  16  16   0    6.91   24.03
 -17  17   0  124.61   50.66
 -16  17   0   73.26   31.41
 -15  17   0  -30.65   22.73
 -14  17   0   62.90   26.70
 -13  17   0   15.90   19.36
 -12  17   0   84.83   23.12
 -11  17   0  -25.01   12.34
 -10  17   0  201.94   22.06
  -9  17   0  153.01   22.32
  -8  17   0  115.58   18.68
  -7  17   0   81.69   15.41
  -6  17   0  320.50   20.86
  -5  17   0   66.07   13.38
  -4  17   0  621.74   26.51
  -3  17   0   24.58    8.88
  -2  17   0   44.15   10.15
  -1  17   0  115.61   11.58
   2  17   0   23.22    9.03
   2  17   0   27.13    7.23
   3  17   0    8.64    6.16
   4  17   0  564.32   27.20
   4  17   0  564.69   19.86
   5  17   0   69.28   14.16
   5  17   0   48.44    9.27
   6  17   0  262.88   21.33
   6  17   0  247.55   13.85
   7  17   0   36.75   13.53
   8  17   0  128.85   21.27
   9  17   0  126.33   22.41
  10  17   0  183.80   27.63
  11  17   0  -15.86   13.15
  12  17   0   97.18   24.17
  13  17   0    9.63   19.31
  14  17   0   54.78   23.83
  15  17   0   -2.52   19.10
  16  17   0   37.89   26.31
 -16  18   0  316.78   50.84
 -15  18   0   18.02   25.79
 -14  18   0  274.91   39.43
 -13  18   0   22.75   20.56
 -12  18   0   30.16   17.85
 -11  18   0   45.95   18.24
 -10  18   0   44.02   17.56
  -9  18   0   26.10   15.29
  -8  18   0  398.65   25.60
  -7  18   0   35.51   12.90
  -6  18   0  890.63   34.88
  -5  18   0  208.95   17.36
  -4  18   0  523.56   24.80
  -3  18   0  210.51   15.68
  -2  18   0  880.94   31.04
  -1  18   0   14.46    8.13
   0  18   0  479.61   20.19
   0  18   0  480.67   21.90
   1  18   0   13.46    6.78
   1  18   0   24.05    9.14
   2  18   0  831.21   25.17
   2  18   0  832.17   31.23
   3  18   0  185.94   15.94
   3  18   0  184.97   11.59
   4  18   0  439.36   23.90
   4  18   0  436.51   17.82
   5  18   0  177.09   12.20
   5  18   0  232.03   19.55
   6  18   0  782.63   36.04
   6  18   0  750.45   24.99
   7  18   0    4.50   10.72
   8  18   0  327.10   25.95
   9  18   0   17.40   14.94
  10  18   0   14.98   14.49
  11  18   0   31.86   17.38
  12  18   0   21.22   18.63
  13  18   0   19.67   21.33
  14  18   0  128.66   30.59
  15  18   0  -10.09   18.13
  16  18   0  202.28   36.75
 -16  19   0   95.24   38.08
 -15  19   0   56.19   30.28
 -14  19   0   28.23   24.74
 -13  19   0  173.26   29.90
 -12  19   0  320.33   29.04
 -11  19   0   73.61   20.08
 -10  19   0  326.76   26.69
  -9  19   0   20.00   15.54
  -8  19   0   82.81   18.06
  -7  19   0   33.78   13.46
  -6  19   0  148.17   18.81
  -5  19   0 1004.94   37.03
  -4  19   0  316.26   19.93
  -3  19   0   34.22   10.76
  -2  19   0   52.79   11.24
  -1  19   0   17.71    8.39
   0  19   0   14.17    7.76
   0  19   0    9.65    6.75
   1  19   0   17.60    8.53
   1  19   0   -0.28    5.57
   2  19   0   61.79   11.57
   2  19   0   39.03    8.03
   3  19   0   38.01   11.14
   3  19   0   28.95    7.92
   4  19   0  260.72   14.11
   4  19   0  277.82   20.42
   5  19   0  860.31   26.62
   5  19   0  814.02   36.05
   6  19   0  129.92   19.51
   7  19   0   17.84   13.20
   8  19   0   74.37   18.72
   9  19   0   22.97   16.21
  10  19   0  255.59   26.42
  11  19   0   35.28   18.54
  12  19   0  290.24   30.33
  13  19   0  135.80   30.70
  14  19   0    5.57   20.51
  15  19   0   28.87   24.54
  16  19   0   40.92   25.87
 -16  20   0   84.36   28.57
 -15  20   0   68.47   29.22
 -14  20   0  -21.88   19.91
 -13  20   0  137.08   25.86
 -12  20   0   30.09   16.96
 -11  20   0  152.33   24.28
 -10  20   0   28.47   16.14
  -9  20   0  912.50   41.25
  -8  20   0   84.11   18.52
  -7  20   0  137.81   18.77
  -6  20   0   21.87   12.22
  -5  20   0    5.96    9.49
  -4  20   0   -2.67    8.87
  -3  20   0    3.78    9.43
  -2  20   0  298.31   18.78
  -1  20   0  103.82   15.02
  -1  20   0  125.75   14.90
   0  20   0   82.04   12.55
   0  20   0   93.86   12.30
   1  20   0  106.44   12.29
   1  20   0  115.81   14.82
   2  20   0  256.68   14.25
   2  20   0  256.92   17.49
   3  20   0   12.76    9.89
   3  20   0   11.28    6.89
   4  20   0   -6.80    5.83
   4  20   0   -9.27    8.29
   5  20   0    4.73    6.69
   5  20   0    2.84    9.34
   6  20   0    6.63   10.69
   7  20   0   88.52   19.23
   8  20   0   61.36   18.31
   9  20   0  819.25   43.36
  10  20   0    3.23   14.92
  11  20   0  109.46   24.74
  12  20   0   21.83   19.82
  13  20   0  131.12   29.68
  14  20   0   -1.87   19.36
  15  20   0   13.57   22.09
  16  20   0   44.91   28.22
 -16  21   0   17.50   26.85
 -15  21   0   85.23   26.85
 -14  21   0    5.73   21.87
 -13  21   0   27.80   18.69
 -12  21   0  -13.35   13.45
 -11  21   0   15.96   16.07
 -10  21   0   96.71   20.18
  -9  21   0    5.07   13.69
  -8  21   0   21.28   14.47
  -7  21   0  111.17   19.00
  -6  21   0   17.39   11.73
  -5  21   0   57.54   14.91
  -4  21   0    2.48    9.66
  -3  21   0  348.87   20.97
  -2  21   0   16.49    9.88
  -1  21   0  303.91   19.29
  -1  21   0  267.57   18.02
   0  21   0   -8.26    6.92
   0  21   0   -3.41    6.02
   1  21   0  294.09   15.94
   1  21   0  245.35   17.68
   2  21   0   14.93    8.76
   2  21   0    2.05    6.23
   3  21   0  306.43   16.27
   3  21   0  294.67   20.98
   4  21   0    3.59    7.26
   4  21   0    8.37   10.04
   5  21   0   51.30   14.83
   6  21   0    4.85   11.20
   7  21   0   71.56   18.33
   8  21   0   15.51   14.14
   9  21   0   41.35   18.00
  10  21   0   63.51   21.37
  11  21   0   -0.36   15.37
  12  21   0   -9.88   17.30
  13  21   0    3.22   20.55
  14  21   0   -5.55   18.83
  15  21   0   77.22   29.69
  16  21   0   14.75   26.85
 -16  22   0  134.68   37.20
 -15  22   0   15.33   24.09
 -14  22   0   48.75   24.21
 -13  22   0  191.82   31.13
 -12  22   0    8.91   17.54
 -11  22   0   94.56   22.40
 -10  22   0   51.96   19.22
  -9  22   0  121.66   22.03
  -8  22   0  278.20   24.69
  -7  22   0  178.98   23.66
  -6  22   0  199.42   19.31
  -5  22   0  175.73   17.10
  -4  22   0  210.70   18.02
  -3  22   0    7.82   10.24
  -2  22   0   82.40   13.79
  -1  22   0   62.25   12.48
  -1  22   0   68.81   12.78
   0  22   0   26.33   10.73
   0  22   0   12.03    8.19
   1  22   0   53.13   10.34
   1  22   0   55.36   12.74
   2  22   0   75.57   11.56
   2  22   0   87.82   14.66
   3  22   0   18.29    7.86
   3  22   0   16.00    9.17
   4  22   0  179.31   18.51
   4  22   0  178.86   13.44
   5  22   0  159.95   21.90
   6  22   0  184.43   23.78
   7  22   0  141.18   19.95
   8  22   0  243.72   24.62
   9  22   0   68.76   21.43
  10  22   0   52.61   18.94
  11  22   0   48.98   20.34
  12  22   0    6.35   17.40
  13  22   0   69.50   26.69
  14  22   0   44.22   25.34
  15  22   0  -11.91   23.25
 -15  23   0  -25.40   22.27
 -14  23   0  -22.37   14.65
 -13  23   0   -6.20   19.38
 -12  23   0  219.71   31.77
 -11  23   0   -8.27   15.31
 -10  23   0  132.35   23.57
  -9  23   0   84.00   20.61
  -8  23   0   15.67   15.03
  -7  23   0  -18.96   12.77
  -6  23   0  757.53   35.20
  -5  23   0   62.05   15.48
  -4  23   0  125.80   17.81
  -3  23   0  342.34   21.74
  -2  23   0  215.54   17.51
  -1  23   0  227.73   17.73
  -1  23   0  230.27   17.21
   0  23   0   -0.55    8.24
   0  23   0   -4.31    7.08
   1  23   0  216.32   17.74
   1  23   0  192.35   14.50
   2  23   0  207.26   14.40
   2  23   0  216.84   18.58
   3  23   0  311.66   17.54
   3  23   0  305.74   22.47
   4  23   0  119.85   19.20
   4  23   0  105.94   11.41
   5  23   0   25.50   13.76
   6  23   0  637.67   35.06
   7  23   0   -0.78   12.42
   8  23   0   17.01   14.89
   9  23   0   79.11   22.01
  10  23   0   89.14   24.10
  11  23   0   -3.11   16.11
  12  23   0  163.86   30.87
  13  23   0  -16.52   19.02
  14  23   0   -0.65   21.59
  15  23   0  -15.76   22.83
 -15  24   0  -20.59   22.87
 -14  24   0   10.00   22.00
 -13  24   0    3.39   19.59
 -12  24   0   -0.13   17.05
 -11  24   0   14.73   17.20
 -10  24   0   14.17   15.38
  -9  24   0   38.74   17.79
  -8  24   0  -11.67   13.33
  -7  24   0  -19.14   12.88
  -6  24   0   -6.87   12.50
  -5  24   0  -12.07    9.33
  -4  24   0  134.42   19.00
  -3  24   0   57.17   14.36
  -2  24   0  892.12   35.01
  -1  24   0   20.38   10.95
  -1  24   0   29.57   11.00
   0  24   0   83.11   15.11
   0  24   0   45.89   11.81
   1  24   0   23.92   12.00
   1  24   0   18.57    8.69
   2  24   0  860.43   29.37
   2  24   0  852.97   36.17
   3  24   0   61.67   11.43
   3  24   0   73.35   16.23
   4  24   0   92.65   15.48
   5  24   0  -12.25    9.81
   6  24   0    8.51   13.26
   7  24   0  -27.90   11.00
   8  24   0   27.82   17.42
   9  24   0   45.51   19.90
  10  24   0  -10.80   16.34
  11  24   0    7.30   18.71
  12  24   0   -7.04   18.44
  13  24   0    8.13   20.10
  14  24   0   -6.01   21.45
  15  24   0  -22.77   19.73
 -15  25   0    3.96   18.81
 -14  25   0   -2.24   22.16
 -13  25   0   -3.29   19.97
 -12  25   0    2.47   17.87
 -11  25   0   12.88   16.50
 -10  25   0   32.56   17.61
  -9  25   0    5.73   15.44
  -8  25   0  295.43   25.65
  -7  25   0    0.93   14.74
  -6  25   0   -8.97   13.63
  -5  25   0  -23.43   10.33
  -4  25   0  188.66   18.60
  -3  25   0  245.61   19.69
  -2  25   0  127.87   18.08
  -2  25   0  144.32   15.70
  -1  25   0   84.20   15.32
  -1  25   0   95.66   16.04
   0  25   0    0.02    9.94
   0  25   0   -7.78    7.68
   1  25   0   91.49   16.61
   1  25   0   76.32   13.65
   2  25   0  150.61   20.13
   2  25   0  129.58   13.34
   3  25   0  217.58   20.61
   3  25   0  233.71   15.75
   4  25   0  163.46   23.02
   5  25   0   -0.73   12.44
   6  25   0   20.73   13.44
   7  25   0    2.19   14.04
   8  25   0  226.57   25.53
   9  25   0    5.70   17.03
  10  25   0  -15.86   17.51
  11  25   0   -0.26   18.01
  12  25   0   18.79   22.22
  13  25   0    8.27   22.67
  14  25   0    8.04   22.05
  15  25   0  -19.62   22.06
 -15  26   0   -4.24   26.01
 -14  26   0   61.50   25.43
 -13  26   0  102.96   26.23
 -12  26   0   38.06   22.23
 -11  26   0   79.51   22.40
 -10  26   0   34.20   18.83
  -9  26   0  198.54   27.10
  -8  26   0   55.76   18.14
  -7  26   0  455.34   29.89
  -6  26   0   83.84   19.55
  -5  26   0   16.60   14.59
  -4  26   0   14.31   12.78
  -3  26   0   44.30   14.69
  -2  26   0   10.22   10.52
  -2  26   0   21.84   11.84
  -1  26   0   37.67   12.94
  -1  26   0   55.70   14.20
   0  26   0  289.97   21.41
   0  26   0  304.15   19.97
   1  26   0   25.44   13.16
   1  26   0   29.82   10.91
   2  26   0    3.00    8.42
   2  26   0   17.25   12.43
   3  26   0   69.93   16.47
   4  26   0   -0.28   11.72
   5  26   0   33.27   15.40
   6  26   0   45.49   17.61
   7  26   0  417.78   32.09
   8  26   0   20.62   17.84
   9  26   0  151.79   28.81
  10  26   0    7.92   18.24
  11  26   0   56.03   24.52
  12  26   0   -7.32   18.80
  13  26   0   71.42   27.25
  14  26   0   52.03   27.46
 -14  27   0   22.12   19.58
 -13  27   0   78.87   23.95
 -12  27   0   51.39   22.59
 -11  27   0    1.69   16.27
 -10  27   0   -5.34   15.97
  -9  27   0   51.38   19.12
  -8  27   0   19.14   16.12
  -7  27   0    1.16   14.66
  -6  27   0  138.22   21.83
  -5  27   0  196.85   24.36
  -4  27   0   -6.22   11.58
  -3  27   0   74.60   16.23
  -2  27   0   28.12   13.32
  -2  27   0   14.50   11.35
  -1  27   0  239.47   20.06
  -1  27   0  242.08   19.53
   0  27   0   14.23   11.82
   0  27   0    4.61   10.01
   1  27   0  211.00   16.70
   1  27   0  212.94   19.83
   2  27   0   -2.38    7.99
   2  27   0    9.32   11.36
   3  27   0   86.48   18.32
   4  27   0   -8.27   11.06
   5  27   0  178.75   22.41
   6  27   0  109.56   23.29
   7  27   0   18.97   15.51
   8  27   0   -7.57   15.57
   9  27   0   52.27   22.54
  10  27   0  -21.76   17.67
  11  27   0  -27.78   17.06
  12  27   0   31.22   23.86
  13  27   0   31.84   23.45
  14  27   0  -10.72   23.23
 -14  28   0   11.36   21.16
 -13  28   0   29.18   20.83
 -12  28   0    8.15   18.24
 -11  28   0   70.07   23.04
 -10  28   0   15.41   18.51
  -9  28   0  230.55   25.43
  -8  28   0   14.65   15.17
  -7  28   0  158.46   24.77
  -6  28   0   -9.96   13.48
  -5  28   0   33.25   16.04
  -4  28   0  -12.27   12.29
  -3  28   0  152.05   21.10
  -3  28   0  157.47   22.05
  -2  28   0  221.42   20.23
  -2  28   0  243.50   20.91
  -1  28   0   16.75   12.13
  -1  28   0    8.71   11.30
   0  28   0   -2.41   10.40
   0  28   0   13.86   12.69
   1  28   0    1.90   12.05
   1  28   0    6.83    9.37
   2  28   0  186.40   20.22
   3  28   0  143.36   21.62
   4  28   0   -5.42   12.43
   5  28   0   38.03   16.43
   6  28   0   -7.23   13.21
   7  28   0   64.65   20.97
   8  28   0  -11.81   16.78
   9  28   0  164.35   30.46
  10  28   0   17.44   19.57
  11  28   0   72.73   23.62
  12  28   0    6.31   20.33
  13  28   0    3.85   23.84
  14  28   0   -6.52   26.15
 -14  29   0   75.65   28.41
 -13  29   0   47.19   24.89
 -12  29   0   51.01   21.56
 -11  29   0    4.41   19.23
 -10  29   0  142.42   27.26
  -9  29   0   19.56   16.60
  -8  29   0  262.62   25.96
  -7  29   0  207.99   27.12
  -6  29   0  126.38   22.53
  -5  29   0   46.65   17.74
  -4  29   0  115.57   20.82
  -3  29   0    9.50   13.54
  -3  29   0    0.82   12.48
  -2  29   0   -3.38   11.18
  -2  29   0    0.85   12.18
  -1  29   0   -8.19   11.78
  -1  29   0   -5.11   10.20
   0  29   0   -6.08   11.29
   0  29   0   -3.45   10.14
   1  29   0   -9.64   11.34
   1  29   0   -9.69    9.30
   2  29   0    1.47   12.55
   3  29   0    6.37   12.93
   4  29   0   83.05   20.33
   5  29   0   31.62   17.86
   6  29   0   98.39   23.44
   7  29   0   98.48   25.19
   8  29   0  199.54   33.60
   9  29   0   -0.46   18.46
  10  29   0   95.92   28.55
  11  29   0   -8.87   20.67
  12  29   0   26.64   23.15
  13  29   0   15.90   22.22
  14  29   0   25.10   28.54
 -13  30   0   13.97   22.00
 -12  30   0   53.26   23.68
 -11  30   0   -4.02   18.09
 -10  30   0   26.65   19.86
  -9  30   0    9.42   18.74
  -8  30   0   18.50   17.15
  -7  30   0    6.26   16.12
  -6  30   0  250.46   24.73
  -5  30   0   -8.11   12.47
  -4  30   0  179.35   20.39
  -3  30   0  -24.98    9.83
  -3  30   0   -4.61   11.18
  -2  30   0   35.07   15.67
  -2  30   0   34.20   14.28
  -1  30   0    0.59   11.38
  -1  30   0  -11.81    9.45
   0  30   0  320.70   22.65
   0  30   0  333.66   25.30
   1  30   0    4.68   13.37
   2  30   0    8.22   15.83
   3  30   0  -14.09   12.16
   4  30   0  178.80   26.40
   5  30   0   12.90   16.70
   6  30   0  161.17   28.19
   7  30   0  -15.40   14.63
   8  30   0   11.87   19.54
   9  30   0   -3.64   17.42
  10  30   0   17.48   20.81
  11  30   0  -12.37   17.42
  12  30   0   37.47   24.41
  13  30   0  -18.32   22.08
 -13  31   0   41.12   21.61
 -12  31   0   20.90   22.17
 -11  31   0   16.14   19.90
 -10  31   0  159.41   27.39
  -9  31   0  -22.69   15.90
  -8  31   0  158.80   27.22
  -7  31   0   -0.97   14.27
  -6  31   0   -0.17   15.36
  -5  31   0  103.25   21.39
  -4  31   0  183.51   24.64
  -4  31   0  222.43   28.42
  -3  31   0  -16.10   12.18
  -3  31   0   -8.10   13.71
  -2  31   0   -5.29   12.40
  -2  31   0  -12.21   10.96
  -1  31   0  177.22   23.78
  -1  31   0  136.70   20.31
   0  31   0   34.24   16.36
   0  31   0   19.04   12.83
   1  31   0  143.73   23.28
   2  31   0   -5.76   13.67
   3  31   0   -9.17   13.58
   4  31   0  154.98   26.07
   5  31   0   84.75   22.77
   6  31   0  -17.40   14.69
   7  31   0  -14.55   14.34
   8  31   0  105.74   27.96
   9  31   0   -2.03   19.30
  10  31   0   99.19   29.08
  11  31   0  -30.78   19.86
  12  31   0   15.99   23.74
  13  31   0   16.42   27.48
 -13  32   0   19.15   24.16
 -12  32   0   22.59   21.11
 -11  32   0  138.41   28.13
 -10  32   0   -9.26   17.99
  -9  32   0  259.74   32.51
  -8  32   0   12.91   18.20
  -7  32   0   50.07   20.43
  -6  32   0   -0.29   15.13
  -5  32   0  137.24   23.55
  -4  32   0   49.93   18.34
  -4  32   0   43.42   16.51
  -3  32   0   15.70   14.51
  -3  32   0   22.93   15.74
  -2  32   0   55.14   18.79
  -2  32   0   75.83   18.51
  -1  32   0   10.40   13.26
  -1  32   0   -0.16   11.38
   0  32   0   27.27   15.34
   0  32   0   27.02   14.09
   1  32   0   -1.05   13.40
   2  32   0   71.68   20.13
   3  32   0    7.22   15.54
   4  32   0   57.65   20.50
   5  32   0   95.90   23.67
   6  32   0  -20.94   14.61
   7  32   0   27.15   20.30
   8  32   0  -23.23   16.39
   9  32   0  181.45   33.44
  10  32   0    0.44   21.90
  11  32   0   81.41   29.58
  12  32   0   -1.08   25.68
  13  32   0   30.82   28.61
 -12  33   0   -6.19   20.33
 -11  33   0   51.75   23.75
 -10  33   0   20.76   20.83
  -9  33   0    2.71   18.68
  -8  33   0    6.15   17.31
  -7  33   0   92.44   23.19
  -6  33   0   -8.25   16.07
  -5  33   0   38.09   19.19
  -5  33   0   64.40   19.52
  -4  33   0  -18.92   13.75
  -4  33   0   18.98   15.88
  -3  33   0  269.94   24.66
  -3  33   0  226.84   23.41
  -2  33   0   -4.65   12.81
  -2  33   0    8.50   16.03
  -1  33   0  110.13   21.12
  -1  33   0   98.52   18.88
   0  33   0    1.57   14.43
   1  33   0  135.53   24.11
   2  33   0    3.61   15.41
   3  33   0  218.03   24.47
   4  33   0    5.42   14.93
   5  33   0   52.00   20.73
   6  33   0   -8.51   16.36
   7  33   0   53.67   23.94
   8  33   0   -2.15   17.58
   9  33   0   21.57   20.41
  10  33   0    3.19   21.10
  11  33   0   26.97   22.23
  12  33   0   -5.49   23.69
 -12  34   0   27.36   25.22
 -11  34   0  252.13   34.04
 -10  34   0  -10.14   17.63
  -9  34   0   12.23   19.63
  -8  34   0   -8.72   17.48
  -7  34   0  162.66   26.94
  -6  34   0   62.52   20.93
  -5  34   0  203.97   27.81
  -5  34   0  200.43   29.17
  -4  34   0   22.82   17.39
  -4  34   0   43.51   18.55
  -3  34   0   62.28   19.31
  -3  34   0   25.35   17.21
  -2  34   0   -0.80   15.28
  -2  34   0  -15.27   12.48
  -1  34   0  163.49   25.26
  -1  34   0  148.52   21.84
   0  34   0   -4.55   13.93
   1  34   0  165.42   26.88
   2  34   0   -4.08   14.39
   3  34   0   43.82   19.24
   4  34   0   51.13   20.79
   5  34   0  172.29   29.32
   6  34   0   46.26   21.05
   7  34   0  112.23   27.88
   8  34   0    8.74   20.40
   9  34   0   -1.79   18.40
  10  34   0   26.60   22.90
  11  34   0  127.01   32.89
  12  34   0   11.37   27.21
 -11  35   0   86.07   26.70
 -10  35   0   86.78   26.39
  -9  35   0    8.86   18.34
  -8  35   0  133.46   27.75
  -7  35   0   13.43   19.16
  -6  35   0   15.62   18.60
  -6  35   0   36.35   18.87
  -5  35   0   68.80   21.65
  -5  35   0   39.02   18.78
  -4  35   0  104.00   22.82
  -4  35   0  110.36   24.48
  -3  35   0  219.72   23.64
  -3  35   0  204.86   28.33
  -2  35   0  -17.77   13.44
  -2  35   0   -3.85   14.14
  -1  35   0  119.22   23.29
   0  35   0  -13.68   15.23
   1  35   0   92.72   23.10
   2  35   0   15.23   16.80
   3  35   0  194.69   29.92
   4  35   0   55.66   22.68
   5  35   0   50.85   20.71
   6  35   0   11.58   19.62
   7  35   0   15.65   21.03
   8  35   0   98.74   28.31
   9  35   0   -3.47   20.39
  10  35   0   -4.86   22.73
  11  35   0   33.82   26.96
 -11  36   0    4.42   22.39
 -10  36   0  -12.73   18.83
  -9  36   0    0.82   19.91
  -8  36   0   12.49   20.04
  -7  36   0    7.18   17.33
  -7  36   0   20.84   18.79
  -6  36   0   12.21   19.54
  -6  36   0   12.14   17.25
  -5  36   0   -1.00   16.25
  -5  36   0    1.41   17.22
  -4  36   0  145.38   26.55
  -4  36   0   86.08   23.54
  -3  36   0   37.02   18.11
  -3  36   0   72.46   22.22
  -2  36   0  229.53   24.55
  -1  36   0    8.14   17.25
   0  36   0  202.68   29.25
   1  36   0   -0.35   16.93
   2  36   0  227.17   31.76
   3  36   0   28.03   19.50
   4  36   0  114.69   26.06
   5  36   0   -4.61   15.81
   6  36   0    0.89   19.40
   7  36   0   -7.61   19.48
   8  36   0    0.73   21.98
   9  36   0    2.95   21.85
  10  36   0  -30.73   21.99
  11  36   0   -6.37   22.69
 -10  37   0    2.92   19.41
  -9  37   0  -44.31   15.46
  -8  37   0   30.11   21.98
  -7  37   0   40.80   21.43
  -7  37   0   24.98   20.34
  -6  37   0  108.56   26.88
  -6  37   0  155.17   27.58
  -5  37   0   24.70   17.74
  -5  37   0   26.96   19.62
  -4  37   0  180.14   28.34
  -4  37   0  144.88   26.94
  -3  37   0  110.40   23.49
  -3  37   0   72.88   22.37
  -2  37   0   96.58   22.57
  -1  37   0   64.60   21.06
   0  37   0   -4.98   17.69
   1  37   0   55.82   20.20
   2  37   0   62.55   21.88
   3  37   0   75.23   24.77
   4  37   0  164.16   31.15
   5  37   0    8.04   20.79
   6  37   0  120.35   29.00
   7  37   0   37.14   24.06
   8  37   0   -6.10   21.59
   9  37   0  -16.31   20.84
  10  37   0  -24.83   23.39
 -10  38   0  -16.86   22.13
  -9  38   0  -22.09   20.39
  -8  38   0    3.28   20.13
  -8  38   0   13.46   19.04
  -7  38   0  111.43   26.88
  -7  38   0  237.61   32.30
  -6  38   0   -2.60   17.15
  -6  38   0   -2.86   16.82
  -5  38   0  167.24   30.11
  -5  38   0  179.05   29.78
  -4  38   0   19.69   17.54
  -4  38   0   33.41   20.46
  -3  38   0   65.89   21.96
  -2  38   0   82.67   22.17
  -1  38   0  153.45   27.09
   0  38   0   72.45   23.86
   1  38   0  188.10   30.44
   2  38   0   42.48   21.77
   3  38   0   65.44   25.52
   4  38   0   52.68   22.67
   5  38   0   83.93   26.99
   6  38   0   -6.04   19.94
   7  38   0  125.73   30.71
   8  38   0   -2.50   22.31
   9  38   0  -11.57   21.98
  10  38   0  -36.60   21.82
  -9  39   0    0.60   20.19
  -9  39   0   13.70   23.40
  -8  39   0  -17.35   17.85
  -8  39   0   -1.49   20.18
  -7  39   0   59.93   22.22
  -7  39   0   18.82   21.41
  -6  39   0   -3.51   17.14
  -6  39   0   28.43   21.23
  -5  39   0    9.73   18.51
  -5  39   0    2.60   18.70
  -4  39   0    3.40   18.43
  -4  39   0   -0.05   15.92
  -3  39   0  201.54   30.61
  -2  39   0   14.27   17.89
  -1  39   0  247.75   33.78
   0  39   0   -3.92   19.33
   1  39   0  270.53   35.05
   2  39   0    1.66   18.13
   3  39   0  210.55   33.62
   4  39   0    9.14   20.73
   5  39   0  -13.56   18.07
   6  39   0  -14.11   18.55
   7  39   0   20.23   21.49
   8  39   0  -15.40   22.56
   9  39   0    2.78   24.52
  -8  40   0  -21.80   17.76
  -8  40   0   15.38   21.37
  -7  40   0   34.58   23.42
  -7  40   0  102.06   26.43
  -6  40   0    8.47   19.36
  -6  40   0   24.81   22.25
  -5  40   0   23.96   20.13
  -5  40   0   35.82   22.01
  -4  40   0   27.62   18.74
  -3  40   0   39.18   21.18
  -2  40   0  132.08   28.57
  -1  40   0    9.42   21.01
   0  40   0   62.22   23.42
   1  40   0   32.19   20.99
   2  40   0   96.23   26.84
   3  40   0   85.65   26.82
   4  40   0   33.35   23.01
   5  40   0   33.03   24.34
   6  40   0    0.92   22.49
   7  40   0   54.14   24.84
   8  40   0  -26.34   21.12
  -8  41   0   75.78   26.73
  -8  41   0   68.43   26.74
  -7  41   0   36.08   22.49
  -7  41   0    0.28   19.67
  -6  41   0   64.72   24.80
  -6  41   0   68.19   24.15
  -5  41   0   45.47   21.47
  -4  41   0  112.05   27.13
  -3  41   0    2.56   18.99
  -2  41   0   32.67   22.05
  -1  41   0   -0.80   18.92
   0  41   0   10.38   20.32
   1  41   0   12.94   20.54
   2  41   0   40.41   23.17
   3  41   0  -10.45   19.82
   4  41   0   84.53   26.67
   5  41   0   31.53   23.55
   6  41   0   44.36   24.14
   7  41   0  -22.67   18.92
   8  41   0   64.78   29.08
  -7  42   0   14.01   22.48
  -7  42   0  -22.81   19.68
  -6  42   0   43.97   23.58
  -6  42   0   -4.77   18.52
  -5  42   0   -2.59   19.63
  -4  42   0   74.36   24.64
  -3  42   0   12.27   19.78
  -2  42   0   25.59   22.39
  -1  42   0  -41.87   17.32
   0  42   0  189.26   32.88
   1  42   0  -27.13   17.10
   2  42   0   64.66   27.66
   3  42   0    1.15   22.91
   4  42   0   79.59   26.91
   5  42   0   -7.33   21.17
   6  42   0  -24.79   20.35
   7  42   0   -6.50   22.45
  -6  43   0   13.68   22.23
  -5  43   0   18.83   21.85
  -4  43   0   40.04   22.94
  -3  43   0   80.69   25.57
  -2  43   0  -13.44   19.27
  -1  43   0   21.27   22.74
   0  43   0    4.86   20.24
   1  43   0   36.57   22.11
   2  43   0  -26.17   17.78
   3  43   0   30.86   22.70
   4  43   0   21.51   22.44
   5  43   0   -5.51   23.04
   6  43   0   -0.47   21.79
  -5  44   0   54.39   25.57
  -4  44   0   13.89   21.36
  -3  44   0   39.57   23.13
  -2  44   0   -6.05   20.88
  -1  44   0   23.98   22.83
   0  44   0   12.71   24.01
   1  44   0   -5.64   20.11
   2  44   0    4.39   21.79
   3  44   0   45.21   26.88
   4  44   0   14.83   22.79
   5  44   0   61.00   28.67
  -3  45   0   14.18   22.48
  -2  45   0    4.37   23.70
  -1  45   0   86.91   28.09
   0  45   0    8.83   21.73
   1  45   0  100.71   29.03
   2  45   0  -10.43   22.78
   3  45   0   30.95   25.11
   3  45  -1   22.16   25.05
   2  45  -1    4.31   23.00
   1  45  -1   -1.76   22.31
   0  45  -1   -3.19   23.21
  -1  45  -1  -19.19   20.98
  -2  45  -1  -16.02   22.26
  -3  45  -1  -13.88   19.59
   5  44  -1   -4.72   23.74
   4  44  -1   51.44   25.45
   3  44  -1  -16.70   19.79
   2  44  -1   26.71   24.50
   1  44  -1    6.84   20.32
   0  44  -1   79.08   26.54
  -1  44  -1  -18.42   19.43
  -2  44  -1   -8.63   21.01
  -3  44  -1  -18.77   20.50
  -4  44  -1   28.59   23.47
   6  43  -1   10.81   26.88
   5  43  -1   12.04   23.26
   4  43  -1   18.88   23.98
   3  43  -1   29.91   24.58
   2  43  -1   -2.98   19.73
   1  43  -1   66.90   26.67
   0  43  -1    2.07   20.22
  -1  43  -1   -4.40   18.72
  -2  43  -1    1.67   20.95
  -3  43  -1   -9.74   19.66
  -4  43  -1   23.93   21.61
  -5  43  -1    7.01   19.21
  -6  43  -1   27.22   22.96
   7  42  -1   49.06   28.24
   6  42  -1   12.19   24.14
   5  42  -1   59.03   26.46
   4  42  -1   -2.42   18.12
   3  42  -1  -13.56   20.33
   2  42  -1   -3.55   17.46
   1  42  -1   30.86   23.42
   0  42  -1   15.54   21.15
  -1  42  -1   41.48   24.82
  -2  42  -1   37.86   23.66
  -3  42  -1   33.17   22.54
  -4  42  -1  -20.83   18.19
  -5  42  -1   41.02   23.12
  -6  42  -1   -5.09   19.31
  -7  42  -1   34.55   23.45
  -7  42  -1   41.41   23.10
   8  41  -1  -32.70   23.71
   7  41  -1    7.90   23.82
   6  41  -1   14.94   24.35
   5  41  -1  -11.49   19.36
   4  41  -1   -8.99   19.70
   3  41  -1   47.83   24.36
   2  41  -1   12.61   20.13
   1  41  -1  100.11   26.97
   0  41  -1   18.77   19.58
  -1  41  -1   90.19   28.69
  -2  41  -1    2.41   19.07
  -3  41  -1  159.41   29.58
  -4  41  -1   -9.15   19.09
  -5  41  -1   12.04   20.51
  -6  41  -1   -5.68   17.29
  -6  41  -1    1.97   19.75
  -7  41  -1   11.74   21.41
  -7  41  -1   20.48   20.27
   9  40  -1  -19.21   23.86
   8  40  -1  -18.42   21.56
   7  40  -1   34.51   26.70
   6  40  -1   16.80   21.28
   5  40  -1   31.94   21.03
   4  40  -1   94.83   27.58
   3  40  -1   33.54   23.31
   2  40  -1    7.11   18.26
   1  40  -1  116.79   28.95
   0  40  -1  117.31   29.60
  -1  40  -1   -1.22   18.78
  -2  40  -1   82.13   24.82
  -3  40  -1   13.82   19.44
  -4  40  -1   27.40   21.15
  -5  40  -1   31.85   21.67
  -5  40  -1   48.59   24.05
  -6  40  -1   10.91   19.35
  -6  40  -1   10.93   19.87
  -7  40  -1  155.13   31.13
  -7  40  -1  168.52   30.20
  -8  40  -1   -6.83   19.34
  -8  40  -1   10.05   21.16
   9  39  -1   -7.72   23.31
   8  39  -1   54.65   27.23
   7  39  -1  -11.88   19.38
   6  39  -1   49.52   24.42
   5  39  -1   11.34   20.32
   4  39  -1   60.74   23.96
   3  39  -1   21.52   21.20
   2  39  -1   35.76   21.38
   1  39  -1   21.13   19.71
   0  39  -1   -0.49   17.89
  -1  39  -1   11.49   18.66
  -2  39  -1   52.82   21.98
  -3  39  -1   35.62   20.99
  -4  39  -1  158.21   28.33
  -5  39  -1  -17.09   15.38
  -5  39  -1  -16.44   15.33
  -6  39  -1  168.60   30.07
  -6  39  -1  112.00   27.50
  -7  39  -1    5.67   19.85
  -7  39  -1   52.78   21.03
  -8  39  -1   47.89   24.44
  -9  39  -1  -23.59   20.34
  10  38  -1  -18.66   23.32
   9  38  -1  -14.41   23.01
   8  38  -1   -4.95   21.26
   7  38  -1   -9.06   19.95
   6  38  -1   -3.44   19.79
   5  38  -1  -10.94   18.68
   4  38  -1   78.68   25.43
   3  38  -1   38.15   23.13
   2  38  -1  158.06   29.22
   1  38  -1    1.47   18.78
   0  38  -1  138.45   28.38
  -1  38  -1    4.72   18.54
  -2  38  -1  249.64   32.03
  -3  38  -1   40.95   21.27
  -4  38  -1   53.15   20.54
  -4  38  -1   71.33   22.67
  -5  38  -1   15.38   19.14
  -5  38  -1   14.00   20.37
  -6  38  -1   71.00   23.62
  -6  38  -1   50.66   20.72
  -7  38  -1    3.11   20.32
  -8  38  -1   -2.85   17.24
  -9  38  -1  -16.02   21.23
  10  37  -1  -18.82   23.18
   9  37  -1  -17.98   21.85
   8  37  -1   -2.11   22.82
   7  37  -1   30.54   22.93
   6  37  -1    0.42   19.26
   5  37  -1  -13.55   17.12
   4  37  -1   59.80   22.94
   3  37  -1  174.53   30.26
   2  37  -1   33.34   19.91
   1  37  -1  120.68   25.07
   0  37  -1   -3.80   17.95
  -1  37  -1   81.45   23.85
  -2  37  -1   -4.84   17.58
  -3  37  -1  183.05   28.54
  -3  37  -1  145.40   25.54
  -4  37  -1    2.07   15.91
  -4  37  -1   37.46   20.89
  -5  37  -1   29.92   18.95
  -5  37  -1    2.10   16.27
  -6  37  -1   52.43   22.69
  -6  37  -1  138.33   27.08
  -7  37  -1   23.42   20.67
  -8  37  -1   17.84   21.96
  -9  37  -1  -31.27   16.10
 -10  37  -1   34.76   22.36
  11  36  -1  114.78   34.26
  10  36  -1  -20.33   23.15
   9  36  -1  -18.49   21.24
   8  36  -1  -24.01   20.06
   7  36  -1   79.49   26.10
   6  36  -1  -24.06   16.53
   5  36  -1  140.30   26.75
   4  36  -1    5.69   18.76
   3  36  -1   37.85   18.92
   2  36  -1    5.94   18.73
   1  36  -1  242.44   31.50
   0  36  -1    2.23   17.13
  -1  36  -1  148.55   26.46
  -2  36  -1  -26.98   13.56
  -3  36  -1   84.18   22.03
  -3  36  -1   33.09   17.86
  -4  36  -1   11.43   17.35
  -4  36  -1   -0.07   16.79
  -5  36  -1  143.30   25.94
  -5  36  -1  115.91   25.78
  -6  36  -1   70.87   22.58
  -7  36  -1  322.94   31.12
  -8  36  -1    5.75   18.07
  -9  36  -1   -2.83   19.78
 -10  36  -1   27.65   24.04
 -11  36  -1   99.31   30.41
  11  35  -1   42.63   28.84
  10  35  -1    2.09   23.33
   9  35  -1  -26.74   19.23
   8  35  -1   19.98   22.20
   7  35  -1   47.73   22.38
   6  35  -1  -14.36   16.47
   5  35  -1   10.84   17.86
   4  35  -1   47.49   20.91
   3  35  -1  274.65   28.46
   2  35  -1   40.10   21.89
   1  35  -1  115.15   24.11
   0  35  -1   18.31   15.69
  -1  35  -1   44.27   19.10
  -2  35  -1   32.62   17.94
  -2  35  -1   -4.02   14.88
  -3  35  -1  193.03   28.69
  -3  35  -1  129.70   24.97
  -4  35  -1   81.25   22.09
  -4  35  -1  101.46   23.43
  -5  35  -1   14.77   18.20
  -5  35  -1  -11.63   15.49
  -6  35  -1   32.37   19.56
  -7  35  -1  148.30   26.88
  -8  35  -1  -11.49   18.57
  -9  35  -1  -14.49   17.30
 -10  35  -1    1.84   20.18
 -11  35  -1   23.80   19.67
  12  34  -1   50.99   28.36
  11  34  -1   -1.84   23.16
  10  34  -1   13.75   22.79
   9  34  -1   99.64   27.64
   8  34  -1   47.70   23.19
   7  34  -1   74.90   25.10
   6  34  -1   23.20   18.63
   5  34  -1   40.97   21.12
   4  34  -1  257.57   27.40
   3  34  -1   35.09   18.53
   2  34  -1  212.98   29.79
   1  34  -1  -15.30   13.47
   0  34  -1   34.92   17.70
  -1  34  -1    4.47   14.89
  -2  34  -1  116.65   22.71
  -2  34  -1   96.69   20.39
  -3  34  -1    5.52   14.33
  -3  34  -1   -2.16   14.12
  -4  34  -1   23.83   16.91
  -4  34  -1   14.27   16.99
  -5  34  -1   18.20   17.38
  -6  34  -1   -9.60   16.09
  -7  34  -1   27.61   19.71
  -8  34  -1  -10.52   15.73
  -9  34  -1   71.42   24.26
 -10  34  -1    6.68   18.82
 -11  34  -1   53.02   25.32
 -12  34  -1   -2.48   21.97
  12  33  -1   77.64   28.61
  11  33  -1  -10.16   21.01
  10  33  -1   76.31   27.85
   9  33  -1   -4.23   18.17
   8  33  -1  289.63   31.95
   7  33  -1   15.82   20.30
   6  33  -1   64.21   21.28
   5  33  -1   -0.32   17.71
   4  33  -1  111.37   25.02
   3  33  -1   93.11   22.54
   2  33  -1  -13.84   12.97
   1  33  -1   -4.82   14.67
   0  33  -1   22.57   16.59
  -1  33  -1   18.41   15.71
  -1  33  -1   12.45   13.07
  -2  33  -1   -7.26   12.40
  -2  33  -1  -13.66   12.40
  -3  33  -1   23.69   17.18
  -3  33  -1  -17.43   13.44
  -4  33  -1  156.82   25.25
  -4  33  -1  158.57   26.04
  -5  33  -1  113.85   23.94
  -6  33  -1   50.54   20.71
  -7  33  -1   11.77   18.29
  -8  33  -1   92.78   24.27
  -9  33  -1  -17.51   17.09
 -10  33  -1  138.97   29.55
 -11  33  -1  -10.09   19.36
 -12  33  -1   47.30   22.80
  13  32  -1   -0.82   22.99
  12  32  -1   67.45   27.67
  11  32  -1   72.20   29.58
  10  32  -1  -11.03   21.04
   9  32  -1   -1.78   20.27
   8  32  -1   14.68   19.25
   7  32  -1   12.47   20.06
   6  32  -1  100.14   23.12
   5  32  -1   31.36   19.41
   4  32  -1  259.30   32.06
   3  32  -1   47.64   18.51
   2  32  -1  -21.91   12.85
   1  32  -1   23.10   16.36
   0  32  -1  279.26   24.86
  -1  32  -1  183.07   19.10
  -1  32  -1  193.54   26.01
  -2  32  -1    7.07   14.00
  -2  32  -1   10.13   14.18
  -3  32  -1   -1.44   14.25
  -3  32  -1   -0.25   14.29
  -4  32  -1   56.95   18.52
  -5  32  -1   24.04   17.40
  -6  32  -1  245.92   30.66
  -7  32  -1   42.29   20.25
  -8  32  -1    2.84   18.00
  -9  32  -1   -6.15   16.18
 -10  32  -1   33.59   20.27
 -11  32  -1   -3.65   17.61
 -12  32  -1   38.24   25.30
  13  31  -1   86.18   31.22
  12  31  -1  -26.98   21.55
  11  31  -1    5.83   22.58
  10  31  -1   28.23   23.07
   9  31  -1    3.98   19.97
   8  31  -1   23.45   21.57
   7  31  -1  101.38   26.41
   6  31  -1   36.75   18.41
   5  31  -1  179.29   28.74
   4  31  -1  130.27   24.96
   3  31  -1  165.09   25.51
   2  31  -1  -14.12   12.10
   1  31  -1   97.47   20.63
   0  31  -1   34.83   14.89
   0  31  -1   58.40   17.87
  -1  31  -1   29.57   13.73
  -1  31  -1   58.43   18.20
  -2  31  -1   -9.93   11.15
  -2  31  -1  -11.74   12.62
  -3  31  -1   34.74   16.39
  -3  31  -1   44.81   16.97
  -4  31  -1   21.37   14.41
  -5  31  -1   24.26   15.39
  -6  31  -1   91.33   21.31
  -7  31  -1   58.55   19.69
  -8  31  -1  223.80   30.33
  -9  31  -1   30.39   20.32
 -10  31  -1  134.13   26.65
 -11  31  -1  -16.85   19.56
 -12  31  -1   13.15   21.28
 -13  31  -1    9.42   24.92
  13  30  -1   -0.08   23.47
  12  30  -1   38.28   24.20
  11  30  -1   73.40   26.06
  10  30  -1  -12.32   17.45
   9  30  -1  220.45   34.16
   8  30  -1    9.82   19.16
   7  30  -1   76.56   22.81
   6  30  -1   25.81   17.76
   5  30  -1  181.43   27.46
   4  30  -1   25.29   16.80
   3  30  -1  -11.12   11.66
   2  30  -1   -8.39   13.23
   1  30  -1   28.91   15.92
   0  30  -1    6.43   12.24
   0  30  -1    0.34   11.19
  -1  30  -1    7.93   13.49
  -1  30  -1   16.53   13.28
  -2  30  -1   -9.49   10.42
  -2  30  -1   -0.67   14.19
  -3  30  -1  105.46   19.92
  -4  30  -1  204.25   22.37
  -5  30  -1  153.27   23.78
  -6  30  -1    4.99   14.66
  -7  30  -1  155.25   25.48
  -8  30  -1    5.11   17.17
  -9  30  -1  166.81   28.27
 -10  30  -1   19.88   20.13
 -11  30  -1   89.76   26.00
 -12  30  -1   -9.81   17.42
 -13  30  -1  116.98   29.01
  14  29  -1   18.87   26.28
  13  29  -1   25.34   24.51
  12  29  -1  -18.77   21.30
  11  29  -1  -21.30   19.00
  10  29  -1   50.50   24.68
   9  29  -1   -6.30   17.56
   8  29  -1  203.48   32.53
   7  29  -1    2.73   16.16
   6  29  -1    0.74   15.17
   5  29  -1   72.37   20.30
   4  29  -1   31.43   15.09
   3  29  -1   44.18   16.90
   2  29  -1   69.86   18.39
   1  29  -1   26.45   15.56
   1  29  -1   68.16   13.91
   0  29  -1   20.26   13.69
   0  29  -1   22.33   11.99
  -1  29  -1  458.77   26.80
  -1  29  -1  451.93   28.23
  -2  29  -1   12.67   14.18
  -2  29  -1   21.45   13.80
  -3  29  -1  181.62   23.91
  -4  29  -1  195.94   24.66
  -5  29  -1  517.37   32.05
  -6  29  -1   31.49   17.39
  -7  29  -1   42.43   18.17
  -8  29  -1    7.11   17.16
  -9  29  -1   31.38   19.36
 -10  29  -1  -10.63   15.65
 -11  29  -1   20.51   18.06
 -12  29  -1   -8.35   20.76
 -13  29  -1  132.68   30.19
  14  28  -1   89.52   31.34
  13  28  -1   20.38   24.84
  12  28  -1   28.17   23.16
  11  28  -1  -16.04   16.70
  10  28  -1  -14.88   16.34
   9  28  -1  -11.77   17.89
   8  28  -1   64.26   21.76
   7  28  -1   55.22   21.27
   6  28  -1   69.28   20.77
   5  28  -1  114.63   22.87
   4  28  -1  124.59   22.05
   3  28  -1   53.14   17.07
   2  28  -1   32.24   15.65
   1  28  -1   91.60   15.14
   1  28  -1   87.16   17.52
   0  28  -1  279.90   19.45
   0  28  -1  280.77   22.74
  -1  28  -1   36.52   14.68
  -1  28  -1   25.26   11.34
  -2  28  -1  159.45   22.44
  -2  28  -1  149.76   20.23
  -3  28  -1    2.30   13.49
  -4  28  -1   30.89   16.47
  -5  28  -1   46.56   17.36
  -6  28  -1  167.11   24.72
  -7  28  -1  233.08   28.20
  -8  28  -1  175.89   25.81
  -9  28  -1  319.51   29.02
 -10  28  -1   20.93   18.60
 -11  28  -1  100.64   25.00
 -12  28  -1   73.69   25.06
 -13  28  -1   30.64   23.53
 -14  28  -1  112.99   32.27
  14  27  -1   15.50   23.41
  13  27  -1   -3.27   20.71
  12  27  -1   37.51   24.86
  11  27  -1  -18.17   17.52
  10  27  -1   68.41   25.17
   9  27  -1  -12.11   14.99
   8  27  -1  216.19   31.20
   7  27  -1   13.76   16.90
   6  27  -1  263.39   26.16
   5  27  -1   92.10   20.64
   4  27  -1   66.40   17.55
   3  27  -1   -0.54   11.36
   2  27  -1  130.31   20.84
   1  27  -1    6.19    9.62
   1  27  -1   -6.76   11.13
   0  27  -1   52.26   12.94
   0  27  -1   65.71   16.32
  -1  27  -1   46.75   13.49
  -1  27  -1   73.85   16.97
  -2  27  -1  126.26   19.46
  -3  27  -1   80.20   17.66
  -4  27  -1  345.65   26.15
  -5  27  -1  -19.59   12.98
  -6  27  -1  124.19   22.57
  -7  27  -1    0.82   13.67
  -8  27  -1  479.72   32.80
  -9  27  -1   28.04   19.61
 -10  27  -1  211.80   30.58
 -11  27  -1    4.05   19.27
 -12  27  -1   87.14   24.32
 -13  27  -1   36.54   23.70
 -14  27  -1  106.40   29.09
  15  26  -1  -23.63   24.04
  14  26  -1   -1.54   24.89
  13  26  -1    1.06   20.55
  12  26  -1    6.44   18.00
  11  26  -1   23.53   20.43
  10  26  -1   41.59   19.76
   9  26  -1   53.16   21.18
   8  26  -1   63.60   19.88
   7  26  -1   44.24   18.09
   6  26  -1   19.09   13.96
   5  26  -1   -4.79   12.13
   4  26  -1    4.93   12.13
   3  26  -1    6.83   10.05
   2  26  -1  406.16   20.13
   2  26  -1  369.20   25.16
   1  26  -1   -1.78    7.88
   1  26  -1   -4.98   10.17
   0  26  -1   22.05   10.61
   0  26  -1   27.07   13.46
  -1  26  -1   27.14   12.94
  -1  26  -1   37.52   12.63
  -2  26  -1 1132.28   42.19
  -3  26  -1  179.77   19.15
  -4  26  -1  163.39   22.53
  -5  26  -1   15.09   13.58
  -6  26  -1   24.11   16.36
  -7  26  -1   -4.46   14.44
  -8  26  -1   22.26   15.91
  -9  26  -1   70.31   21.41
 -10  26  -1  106.05   24.86
 -11  26  -1   -2.55   18.86
 -12  26  -1   34.47   19.88
 -13  26  -1    4.11   16.01
 -14  26  -1   66.28   26.23
  15  25  -1  -25.90   24.82
  14  25  -1  -45.66   17.49
  13  25  -1   -1.19   21.08
  12  25  -1   78.54   25.96
  11  25  -1   -7.11   17.06
  10  25  -1    5.56   18.16
   9  25  -1   82.31   22.69
   8  25  -1   -8.16   14.44
   7  25  -1   16.26   15.04
   6  25  -1  271.41   25.07
   5  25  -1   -3.48   10.74
   4  25  -1    8.96   11.45
   3  25  -1   32.30   13.53
   2  25  -1  244.74   21.14
   2  25  -1  246.37   16.19
   1  25  -1  189.69   15.08
   1  25  -1  183.73   18.36
   0  25  -1   47.61   13.52
   0  25  -1   32.01   12.08
  -1  25  -1  738.95   33.13
  -1  25  -1  718.87   30.56
  -2  25  -1   42.77   13.76
  -3  25  -1  224.60   20.03
  -4  25  -1   14.05   12.46
  -5  25  -1  375.09   25.96
  -6  25  -1  258.81   23.88
  -7  25  -1   73.00   20.02
  -8  25  -1  156.67   24.65
  -9  25  -1  174.97   26.56
 -10  25  -1   57.17   21.99
 -11  25  -1   52.40   22.47
 -12  25  -1  106.39   26.47
 -13  25  -1   11.30   19.58
 -14  25  -1  -21.26   21.54
 -15  25  -1   14.50   22.81
  15  24  -1  -12.34   23.77
  14  24  -1  -31.40   18.69
  13  24  -1   89.66   28.42
  12  24  -1    4.42   19.31
  11  24  -1   23.58   21.02
  10  24  -1   32.73   20.57
   9  24  -1   32.47   18.85
   8  24  -1  -11.64   12.20
   7  24  -1  186.31   25.93
   6  24  -1   16.01   12.76
   5  24  -1  107.88   19.56
   4  24  -1  198.36   23.66
   3  24  -1   62.55   11.13
   3  24  -1   47.96   15.02
   2  24  -1  147.61   12.81
   2  24  -1  151.17   20.27
   1  24  -1  153.14   13.48
   1  24  -1  152.45   16.54
   0  24  -1  202.11   17.80
   0  24  -1  216.38   16.68
  -1  24  -1   34.19   11.39
  -1  24  -1   73.41   14.82
  -2  24  -1  112.22   17.63
  -3  24  -1   37.70   13.39
  -4  24  -1   16.15   12.15
  -5  24  -1  134.02   20.77
  -6  24  -1   79.87   18.79
  -7  24  -1  628.31   34.94
  -8  24  -1  155.01   24.59
  -9  24  -1  299.80   26.75
 -10  24  -1   15.51   17.23
 -11  24  -1  238.02   31.46
 -12  24  -1    7.92   19.86
 -13  24  -1   81.61   27.84
 -14  24  -1  -27.83   20.94
 -15  24  -1  -28.39   22.63
  15  23  -1    5.02   25.14
  14  23  -1    4.90   22.56
  13  23  -1   14.80   20.19
  12  23  -1   30.59   21.17
  11  23  -1   53.90   22.19
  10  23  -1   -6.38   14.18
   9  23  -1   -6.86   15.27
   8  23  -1    1.77   14.78
   7  23  -1    0.76   12.61
   6  23  -1    3.39   11.52
   5  23  -1   29.04   13.84
   4  23  -1    0.32   11.09
   3  23  -1  322.06   16.88
   3  23  -1  309.25   22.65
   2  23  -1   84.23   11.67
   2  23  -1  113.70   17.44
   1  23  -1  138.56   12.61
   1  23  -1  142.97   15.72
   0  23  -1  104.65   13.89
   0  23  -1  141.34   18.20
  -1  23  -1  678.90   30.22
  -2  23  -1  105.27   15.21
  -3  23  -1 1233.45   42.87
  -4  23  -1  167.69   17.59
  -5  23  -1  190.87   19.24
  -6  23  -1  111.37   19.82
  -7  23  -1   41.87   17.46
  -8  23  -1  429.24   29.80
  -9  23  -1   33.73   16.63
 -10  23  -1   18.84   16.58
 -11  23  -1   93.12   22.77
 -12  23  -1   34.21   22.20
 -13  23  -1   68.05   26.12
 -14  23  -1   -4.63   19.30
 -15  23  -1  100.41   34.30
  16  22  -1   43.98   27.87
  15  22  -1  -24.96   19.61
  14  22  -1  -27.26   17.73
  13  22  -1   40.81   23.68
  12  22  -1    5.88   17.09
  11  22  -1    6.92   16.37
  10  22  -1   56.54   20.89
   9  22  -1  239.24   31.31
   8  22  -1   42.62   17.71
   7  22  -1  211.47   26.50
   6  22  -1  116.58   20.08
   5  22  -1   11.01   11.15
   4  22  -1   -7.63    9.77
   4  22  -1    0.04    6.61
   3  22  -1  102.15   16.95
   3  22  -1   94.34   12.43
   2  22  -1  350.83   17.04
   2  22  -1  310.07   21.48
   1  22  -1  139.14   14.97
   1  22  -1  124.69   11.88
   0  22  -1   11.70    9.66
   0  22  -1   -0.07    6.68
  -1  22  -1   19.74   10.38
  -2  22  -1 1091.80   38.88
  -3  22  -1   58.21   13.74
  -4  22  -1  620.99   29.78
  -5  22  -1   11.84   11.98
  -6  22  -1   41.60   14.43
  -7  22  -1  -20.62   12.06
  -8  22  -1   92.42   20.57
  -9  22  -1  236.35   23.52
 -10  22  -1   58.32   19.91
 -11  22  -1  133.94   24.50
 -12  22  -1   22.48   20.63
 -13  22  -1   11.09   21.38
 -14  22  -1   13.28   20.28
 -15  22  -1   17.86   27.00
  16  21  -1    9.94   22.26
  15  21  -1   -7.29   22.31
  14  21  -1  -19.55   18.08
  13  21  -1   -9.42   19.20
  12  21  -1   82.42   24.75
  11  21  -1  -19.22   12.92
  10  21  -1  209.61   30.34
   9  21  -1   -4.16   14.23
   8  21  -1   71.20   19.80
   7  21  -1   32.29   13.82
   6  21  -1  498.75   30.18
   5  21  -1  327.89   24.06
   4  21  -1    5.30    6.94
   4  21  -1   11.24   11.17
   3  21  -1    9.46    7.34
   3  21  -1   13.02    9.64
   2  21  -1  146.03   15.59
   2  21  -1  166.47   12.23
   1  21  -1   38.48   11.21
   1  21  -1   29.97    8.47
   0  21  -1  126.56   14.59
   0  21  -1   87.84   14.53
  -1  21  -1   25.88   10.65
  -2  21  -1  504.31   25.23
  -3  21  -1   57.27   13.54
  -4  21  -1  703.48   31.24
  -5  21  -1   -2.94   10.13
  -6  21  -1  457.07   27.03
  -7  21  -1   50.59   16.92
  -8  21  -1  208.67   25.58
  -9  21  -1   24.19   16.23
 -10  21  -1  351.98   28.54
 -11  21  -1   -4.64   14.97
 -12  21  -1  646.52   41.00
 -13  21  -1   42.30   21.18
 -14  21  -1   -7.76   21.14
 -15  21  -1  -30.12   16.10
 -16  21  -1  115.00   31.76
  16  20  -1  114.25   31.01
  15  20  -1   -8.83   22.72
  14  20  -1   51.82   24.34
  13  20  -1   28.83   22.26
  12  20  -1   11.38   18.96
  11  20  -1   21.16   17.52
  10  20  -1  242.24   26.44
   9  20  -1   19.74   12.87
   8  20  -1   88.03   19.90
   7  20  -1   15.45   12.11
   6  20  -1  429.13   27.62
   5  20  -1   50.99   12.37
   4  20  -1  460.53   18.29
   4  20  -1  468.36   26.94
   3  20  -1   14.62    9.76
   3  20  -1   10.75    6.98
   2  20  -1  440.15   17.92
   2  20  -1  435.23   23.80
   1  20  -1  140.70   14.11
   1  20  -1  131.88   11.11
   0  20  -1    2.66    6.82
   0  20  -1   -0.28    7.86
  -1  20  -1   19.11    8.92
  -2  20  -1  388.68   21.79
  -3  20  -1   91.78   15.07
  -4  20  -1  299.42   20.38
  -5  20  -1   22.20   11.65
  -6  20  -1  135.27   18.95
  -7  20  -1   69.56   16.44
  -8  20  -1  594.66   33.33
  -9  20  -1   64.64   19.07
 -10  20  -1   24.80   16.76
 -11  20  -1  187.18   26.08
 -12  20  -1   41.73   21.23
 -13  20  -1  111.21   25.71
 -14  20  -1  179.34   34.14
 -15  20  -1   36.30   28.99
 -16  20  -1  421.05   56.15
  16  19  -1   -7.54   22.44
  15  19  -1   -1.78   22.03
  14  19  -1   10.38   18.57
  13  19  -1   13.43   20.03
  12  19  -1   -4.83   16.74
  11  19  -1  152.17   27.48
  10  19  -1  539.70   36.61
  -9 -19   1   33.35   13.19
   9  19  -1   22.50   13.19
   8  19  -1   43.17   15.86
  -8 -19   1   62.09   14.57
   7  19  -1   -4.59   10.48
   6  19  -1   44.83   12.48
   5  19  -1  269.48   21.51
   5  19  -1  304.68   14.20
   4  19  -1  170.44   11.20
   4  19  -1  182.19   17.35
   3  19  -1  250.32   13.36
   3  19  -1  261.02   19.15
   2  19  -1    0.89    5.39
   2  19  -1    4.08    8.54
   1  19  -1  159.82   11.49
   1  19  -1  154.10   14.11
   0  19  -1  121.37   12.64
   0  19  -1  111.71   10.63
  -1  19  -1  306.97   18.57
  -2  19  -1   63.61   12.22
  -3  19  -1  539.95   25.29
  -4  19  -1   74.01   14.44
  -5  19  -1   92.13   15.59
  -6  19  -1   38.81   12.84
  -7  19  -1   59.31   15.71
  -8  19  -1   52.52   16.86
  -9  19  -1   76.24   19.68
 -10  19  -1   61.10   19.23
 -11  19  -1   20.88   15.18
 -12  19  -1   64.95   21.67
 -13  19  -1   85.65   26.14
 -14  19  -1   32.17   25.50
 -15  19  -1  212.76   40.87
 -16  19  -1   82.79   39.05
  16  18  -1   13.11   24.10
  15  18  -1   -8.60   20.15
  14  18  -1   36.18   21.55
  13  18  -1   23.28   20.47
  12  18  -1  -12.88   16.07
  11  18  -1   21.95   17.62
  10  18  -1   34.96   18.22
   9  18  -1  981.64   45.99
  -9 -18   1  943.23   34.98
  -8 -18   1  -18.88    8.38
   8  18  -1    7.01   12.33
   7  18  -1  304.23   24.27
  -7 -18   1  388.21   21.37
   6  18  -1   70.25   14.17
  -6 -18   1   70.60   12.62
   5  18  -1  178.44   17.78
   5  18  -1  169.85   10.88
   4  18  -1  -10.96    7.80
   4  18  -1  -12.29    4.34
   3  18  -1  537.46   26.06
   3  18  -1  543.27   18.69
   2  18  -1   10.80    6.58
   1  18  -1  824.55   25.30
   1  18  -1  797.93   30.00
   0  18  -1  553.04   24.16
  -1  18  -1   56.72   11.72
  -2  18  -1   -8.74    7.19
  -3  18  -1  153.36   17.26
  -4  18  -1   42.34   12.11
  -5  18  -1  282.13   19.84
  -6  18  -1    2.69    9.41
  -7  18  -1  -18.06    9.33
  -8  18  -1    3.79   12.74
  -9  18  -1 1153.46   46.23
 -10  18  -1   39.18   18.25
 -11  18  -1  216.66   28.95
 -12  18  -1   39.45   19.37
 -13  18  -1  405.83   35.70
 -14  18  -1    5.29   21.20
 -15  18  -1  108.50   32.51
 -16  18  -1   43.68   27.66
  17  17  -1   54.23   28.44
  16  17  -1  -12.58   22.19
  15  17  -1   55.96   24.71
  14  17  -1   43.88   20.69
  13  17  -1  156.62   30.63
  12  17  -1    3.12   15.88
  11  17  -1  -10.43   12.75
  10  17  -1  119.40   23.44
  -9 -17   1  107.57   15.35
   9  17  -1  103.48   20.60
   8  17  -1   45.23   16.06
  -8 -17   1   54.48   12.64
  -7 -17   1   -2.11    7.55
   7  17  -1    0.52    8.33
  -6 -17   1  329.16   18.79
   6  17  -1  327.80   14.12
   6  17  -1  316.84   22.18
   5  17  -1  670.45   31.60
   5  17  -1  723.94   21.17
   4  17  -1   40.77    7.85
   4  17  -1   41.66   11.99
   3  17  -1  215.82   16.67
   3  17  -1  225.22   11.61
   2  17  -1   24.49    9.61
   1  17  -1 1265.91   32.80
   1  17  -1 1320.10   39.18
   0  17  -1  549.56   23.60
  -1  17  -1 1714.55   45.89
  -2  17  -1    9.62    8.64
  -3  17  -1   -5.32    7.64
  -4  17  -1  821.30   31.63
  -5  17  -1 1474.22   45.53
  -6  17  -1   82.89   14.81
  -7  17  -1   -3.08    9.09
  -8  17  -1   36.10   14.22
  -9  17  -1   41.08   15.74
 -10  17  -1  100.77   20.90
 -11  17  -1    4.85   16.25
 -12  17  -1  393.93   32.34
 -13  17  -1  307.06   32.58
 -14  17  -1   33.21   20.32
 -15  17  -1   58.98   23.53
 -16  17  -1   47.15   33.51
  17  16  -1  -14.58   23.07
  16  16  -1   -9.35   21.51
  15  16  -1   63.76   25.70
  14  16  -1  207.90   32.83
  13  16  -1    1.99   18.00
  12  16  -1  -15.68   13.31
  11  16  -1  -23.61   13.01
  10  16  -1   41.66   14.85
   9  16  -1   60.74   17.66
  -9 -16   1   76.16   13.99
   8  16  -1  -16.11    8.88
  -8 -16   1   -6.52    7.65
   7  16  -1    3.73   11.09
  -7 -16   1   27.29    8.93
   6  16  -1  262.64   12.80
  -6 -16   1  310.13   17.58
   6  16  -1  256.86   20.79
   5  16  -1  104.42   16.37
  -5 -16   1  107.42   12.05
   5  16  -1  113.18    8.65
   4  16  -1   -2.52    4.54
   4  16  -1    0.30    7.34
   3  16  -1  504.58   24.15
   3  16  -1  539.45   17.42
   2  16  -1 1088.19   35.43
   2  16  -1 1113.13   27.77
   0  16  -1  189.25   14.03
  -1  16  -1   12.21    8.58
  -2  16  -1 2532.79   59.74
  -3  16  -1  282.16   17.77
  -4  16  -1  687.69   28.25
  -5  16  -1 1127.07   38.05
  -6  16  -1  368.33   22.59
  -7  16  -1  260.74   20.13
  -8  16  -1  279.55   22.29
  -9  16  -1  236.35   22.53
 -10  16  -1  -10.85   13.09
 -11  16  -1    3.17   15.37
 -12  16  -1   29.04   19.12
 -13  16  -1   24.63   22.45
 -14  16  -1  177.20   35.60
 -15  16  -1   -4.26   24.63
 -16  16  -1  371.43   56.40
  17  15  -1  -44.25   19.47
  16  15  -1    8.17   23.01
  15  15  -1   21.15   21.60
  14  15  -1   63.96   23.17
  13  15  -1   -0.62   15.82
  12  15  -1  -12.54   14.93
  11  15  -1  -29.88   13.22
  10  15  -1  235.75   24.62
   9  15  -1   64.36   16.90
  -9 -15   1   67.43   13.28
  -8 -15   1   51.94   10.63
   8  15  -1   46.94   13.35
   7  15  -1   17.95    6.86
   7  15  -1   23.83   12.67
  -7 -15   1   43.09   10.41
   6  15  -1  727.57   33.04
   6  15  -1  680.07   20.78
  -6 -15   1  701.90   26.58
  -5 -15   1    0.30    6.24
   5  15  -1   -4.20    4.15
   5  15  -1   -5.38    7.53
   4  15  -1  578.89   26.51
   4  15  -1  602.95   17.89
  -4 -15   1  567.83   23.21
   3  15  -1  266.68   17.62
   3  15  -1  275.06   11.86
   2  15  -1 1559.61   43.06
   2  15  -1 1580.79   34.60
   1  15  -1 1307.51   31.55
   1  15  -1 1279.32   36.99
   0  15  -1  556.10   22.37
  -1  15  -1    8.57    6.04
  -2  15  -1  411.11   19.76
  -3  15  -1   87.92   12.90
  -4  15  -1  994.88   33.75
  -5  15  -1    9.24    9.40
  -6  15  -1  838.22   33.16
  -7  15  -1   14.94    9.70
  -8  15  -1  594.74   30.45
  -9  15  -1   57.85   16.03
 -10  15  -1  146.78   23.90
 -11  15  -1    9.99   16.09
 -12  15  -1  116.52   25.71
 -13  15  -1   46.95   24.59
 -14  15  -1   53.47   28.71
 -15  15  -1  -29.37   26.63
 -16  15  -1    3.86   32.45
 -17  15  -1    0.41   45.58
  17  14  -1  -19.98   21.15
  16  14  -1   29.76   23.26
  15  14  -1   -5.87   19.62
  14  14  -1  109.35   26.51
  13  14  -1   -1.85   15.26
  12  14  -1   19.41   18.09
  11  14  -1   19.70   17.17
  10  14  -1   60.85   18.78
   9  14  -1  141.36   21.83
  -9 -14   1  146.72   13.82
   8  14  -1  101.10   18.38
  -8 -14   1   98.31   11.41
   7  14  -1  -10.08    8.40
  -7 -14   1    3.79    7.36
   7  14  -1   -4.19    5.20
  -6 -14   1    2.51    6.88
   6  14  -1    2.87    5.41
   6  14  -1   -0.22    6.93
   5  14  -1  236.16   17.95
  -5 -14   1  254.39   15.32
   5  14  -1  231.55   10.76
   4  14  -1  259.20   17.98
  -4 -14   1  285.52   15.88
   4  14  -1  287.75   11.54
   3  14  -1  178.88   14.55
   3  14  -1  169.24    9.32
   2  14  -1 1141.14   34.59
   2  14  -1 1124.38   26.65
   1  14  -1   26.35    5.73
   1  14  -1   37.63    8.41
   0  14  -1 1155.25   33.18
  -1  14  -1 2583.54   58.13
  -2  14  -1   15.96    7.65
  -3  14  -1   34.19    9.62
  -4  14  -1  876.19   30.75
  -5  14  -1   86.38   14.04
  -6  14  -1   47.74   12.01
  -7  14  -1   -5.44    8.66
  -8  14  -1    7.50   10.99
  -9  14  -1  306.28   24.18
 -10  14  -1   83.10   20.63
 -11  14  -1   -2.27   14.33
 -12  14  -1  158.06   28.97
 -13  14  -1  202.37   34.61
 -14  14  -1  232.05   40.36
 -15  14  -1   36.38   31.10
 -16  14  -1   86.90   36.04
 -17  14  -1   16.27   46.49
  17  13  -1   28.54   24.43
  16  13  -1   -0.27   19.31
  15  13  -1   13.99   19.73
  14  13  -1    9.20   18.97
  13  13  -1  112.32   26.12
  12  13  -1   32.65   18.15
  11  13  -1    2.62   15.47
  10  13  -1  105.79   21.77
   9  13  -1   24.64   12.64
  -9 -13   1   39.92   10.38
   8  13  -1  287.59   15.39
  -8 -13   1  263.80   16.15
   8  13  -1  262.49   21.85
   7  13  -1  378.84   24.57
   7  13  -1  399.62   16.35
  -7 -13   1  380.08   18.70
   6  13  -1  418.50   15.34
  -6 -13   1  418.10   19.07
   6  13  -1  424.05   24.46
   5  13  -1   68.92    7.70
   5  13  -1   44.57   11.83
  -5 -13   1   63.74    9.80
   4  13  -1  129.56    7.72
  -4 -13   1  123.26   11.32
   4  13  -1  102.41   13.98
  -3 -13   1    9.01    6.02
   3  13  -1   15.12    7.86
   3  13  -1   11.12    4.74
   2  13  -1  799.09   20.36
   2  13  -1  795.72   27.09
   1  13  -1  423.36   14.48
   1  13  -1  406.03   17.93
   0  13  -1  491.12   19.47
  -1  13  -1 3391.47   70.36
  -2  13  -1  814.91   26.82
  -3  13  -1   20.66    8.17
  -4  13  -1  405.07   20.30
  -5  13  -1 1602.62   45.47
  -6  13  -1  329.18   19.55
  -7  13  -1   72.18   14.29
  -8  13  -1  202.72   18.29
  -9  13  -1   33.19   14.19
 -10  13  -1  236.39   27.97
 -11  13  -1  -21.86   12.20
 -12  13  -1  -12.17   17.48
 -13  13  -1  523.33   41.24
 -14  13  -1  -19.74   24.31
 -15  13  -1   32.60   28.18
 -16  13  -1   13.90   39.53
 -17  13  -1  163.83   54.74
  17  12  -1  -11.10   19.30
  16  12  -1   53.28   22.16
  15  12  -1   71.85   24.00
  14  12  -1    0.97   15.73
  13  12  -1  125.66   26.12
  12  12  -1  165.64   27.61
  11  12  -1   16.49   16.01
  10  12  -1   -7.97   11.15
   9  12  -1  592.40   33.03
  -9 -12   1  583.01   24.09
  -8 -12   1   97.01   12.14
   8  12  -1   86.39   11.31
   8  12  -1  102.24   17.79
   7  12  -1  437.67   25.82
  -7 -12   1  434.67   19.70
   7  12  -1  457.27   17.80
  -6 -12   1   -1.21    5.89
   6  12  -1   -2.37    8.00
   6  12  -1   -4.61    4.23
   5  12  -1  968.20   34.85
   5  12  -1  932.77   23.25
  -5 -12   1  970.71   29.44
   4  12  -1  254.05   16.63
   4  12  -1  238.63    9.92
  -4 -12   1  258.59   14.59
   3  12  -1 1348.35   28.24
  -3 -12   1 1332.81   35.63
   3  12  -1 1307.77   37.84
   2  12  -1   22.29    6.80
   2  12  -1   17.62    4.51
   1  12  -1 1046.33   24.82
   1  12  -1 1049.52   29.90
   0  12  -1  240.12   13.01
  -1  12  -1 1075.47   30.40
  -2  12  -1   88.72    9.33
  -3  12  -1 1396.25   37.80
  -4  12  -1  174.48   13.69
  -5  12  -1 1986.33   51.88
  -6  12  -1  785.45   30.27
  -7  12  -1  504.34   26.10
  -8  12  -1   17.46   11.22
  -9  12  -1  970.71   40.75
 -10  12  -1    1.01   14.88
 -11  12  -1  231.75   25.50
 -12  12  -1   -3.14   17.95
 -13  12  -1   49.08   27.06
 -14  12  -1  -44.41   22.97
 -15  12  -1   10.49   27.25
 -16  12  -1   67.53   43.77
 -17  12  -1   52.11   59.10
  17  11  -1   70.89   26.34
  16  11  -1  130.36   29.71
  15  11  -1  214.47   34.21
  14  11  -1  -27.07   13.73
  13  11  -1  136.02   26.38
  12  11  -1   -1.42   14.28
  11  11  -1  306.34   27.91
  10  11  -1  -14.40   11.35
  -9 -11   1   -5.54    7.33
   9  11  -1   -2.58   10.33
   9  11  -1    1.08    7.10
   8  11  -1   34.00    8.72
   8  11  -1   39.15   12.83
  -8 -11   1   37.95    9.16
   7  11  -1  112.97   16.70
  -7 -11   1  112.13   11.10
   7  11  -1  105.63   10.20
   6  11  -1   19.87    9.66
   6  11  -1   31.86    6.63
  -6 -11   1   32.76    8.53
   5  11  -1   19.52    5.08
  -5 -11   1   30.12    7.61
   5  11  -1   14.23    8.58
   4  11  -1 1502.21   30.43
  -4 -11   1 1498.86   38.01
   4  11  -1 1436.88   41.63
   3  11  -1 1948.55   36.16
  -3 -11   1 1869.75   44.11
   3  11  -1 1774.08   46.08
   2  11  -1 1566.41   39.58
   2  11  -1 1604.71   31.49
  -2 -11   1 1515.64   38.37
   1  11  -1 3338.37   67.85
   1  11  -1 3391.55   60.75
   0  11  -1 1039.57   28.51
  -1  11  -1   14.21    5.98
  -2  11  -1   47.06    8.17
  -3  11  -1 1493.81   38.76
  -4  11  -1 1200.87   35.03
  -5  11  -1   79.46   12.59
  -6  11  -1  280.42   18.80
  -7  11  -1  309.71   20.75
  -8  11  -1  574.17   29.24
  -9  11  -1    4.07   11.40
 -10  11  -1   95.79   20.33
 -11  11  -1   91.05   23.48
 -12  11  -1  146.79   28.96
 -13  11  -1  185.06   35.52
 -14  11  -1  -42.08   21.63
 -15  11  -1  285.64   52.86
 -16  11  -1   -5.02   32.29
 -17  11  -1   70.38   57.61
  18  10  -1   20.12   23.89
  17  10  -1   29.64   21.51
  16  10  -1   59.91   24.42
  15  10  -1   -4.72   17.32
  14  10  -1   11.18   18.15
  13  10  -1   47.73   20.29
  12  10  -1   97.18   22.64
  11  10  -1  746.93   39.40
  10  10  -1   88.53   19.14
   9  10  -1  169.51   22.35
  -9 -10   1  152.94   12.85
  -8 -10   1    4.73    6.75
   8  10  -1    2.30    9.25
   8  10  -1    1.15    7.00
   7  10  -1 1264.93   32.47
  -7 -10   1 1169.58   34.11
   7  10  -1 1226.00   42.90
  -6 -10   1   29.71    7.85
   6  10  -1   49.61    7.80
   6  10  -1   36.32   10.82
   5  10  -1   36.94    5.78
   5  10  -1   32.87    9.86
  -5 -10   1   47.07    8.20
   4  10  -1  217.93    8.80
  -4 -10   1  229.63   12.43
   4  10  -1  224.07   14.81
   3  10  -1   -1.59    2.73
  -3 -10   1    0.48    4.29
   3  10  -1    3.50    4.97
   2  10  -1  979.64   28.44
  -2 -10   1  996.93   27.59
   2  10  -1  973.26   21.20
   1  10  -1  448.31   13.28
   1  10  -1  466.47   17.27
   0  10  -1 1033.22   27.52
  -1  10  -1 2467.55   52.30
  -2  10  -1    2.95    4.82
  -3  10  -1  295.85   14.55
  -4  10  -1  237.58   14.62
  -5  10  -1  136.28   12.80
  -6  10  -1  306.15   19.41
  -7  10  -1  147.90   15.62
  -8  10  -1    3.23   10.21
  -9  10  -1  -10.14   11.33
 -10  10  -1  153.97   24.49
 -11  10  -1  274.88   28.01
 -12  10  -1  272.24   35.20
 -13  10  -1   31.63   25.61
 -14  10  -1  148.96   37.45
 -15  10  -1    3.16   35.21
 -16  10  -1  319.11   68.25
 -17  10  -1   46.16   64.86
  18   9  -1  -29.56   16.69
  17   9  -1   -7.20   21.07
  16   9  -1   27.14   22.19
  15   9  -1   96.50   25.79
  14   9  -1   32.25   19.19
  13   9  -1   33.33   17.92
  12   9  -1  665.82   39.29
  11   9  -1  136.66   23.35
  10   9  -1  391.33   28.06
   9   9  -1   -2.88    9.81
  -9  -9   1    4.37    6.95
   8   9  -1  799.39   35.08
  -8  -9   1  770.20   26.55
   8   9  -1  796.75   26.51
  -7  -9   1  322.03   16.40
   7   9  -1  331.33   21.60
   7   9  -1  321.11   15.53
   6   9  -1  928.96   24.87
   6   9  -1  900.95   33.69
  -6  -9   1  893.92   27.31
   5   9  -1  119.15    7.85
   5   9  -1  119.14   12.28
   4   9  -1  291.75   16.36
  -4  -9   1  302.40   13.70
   4   9  -1  320.01   10.35
   3   9  -1  320.56   15.79
  -3  -9   1  330.57   14.21
   3   9  -1  324.93    9.63
   2   9  -1  211.43    7.41
  -2  -9   1  194.62   10.71
   2   9  -1  195.64   11.49
   1   9  -1   75.40    7.34
   1   9  -1   74.81    5.25
   0   9  -1  561.75   18.38
  -1   9  -1 1399.51   33.54
  -2   9  -1 2350.19   50.29
  -3   9  -1  502.96   19.02
  -4   9  -1  206.37   13.29
  -5   9  -1  321.83   17.72
  -6   9  -1 2343.47   58.92
  -7   9  -1  -13.97    8.25
  -8   9  -1  206.84   18.64
  -9   9  -1   -1.05   12.15
 -10   9  -1  237.15   28.05
 -11   9  -1   20.12   16.58
 -12   9  -1  398.11   35.18
 -13   9  -1  -21.31   21.16
 -14   9  -1  -17.43   24.75
 -15   9  -1   13.95   38.71
 -16   9  -1   15.93   49.27
 -17   9  -1  -65.04   74.52
  18   8  -1   32.20   23.37
  17   8  -1   39.80   24.97
  16   8  -1  321.20   39.67
  15   8  -1    0.02   17.93
  14   8  -1  229.09   32.12
  13   8  -1   82.02   21.89
  12   8  -1  427.05   32.11
  11   8  -1  199.91   26.50
  10   8  -1   33.07   14.27
  -9  -8   1   52.27    9.95
   9   8  -1   22.79   11.86
  -8  -8   1  467.88   20.34
   8   8  -1  506.69   20.94
   8   8  -1  458.89   26.35
   7   8  -1  112.67   16.19
  -7  -8   1  106.05   10.72
   7   8  -1   98.49    9.68
   6   8  -1   65.27    8.46
   6   8  -1   48.14   11.12
  -6  -8   1   70.79    9.20
   5   8  -1  805.78   21.03
   5   8  -1  749.22   28.48
  -5  -8   1  881.96   25.17
   4   8  -1   71.01    5.18
  -4  -8   1   70.06    7.24
   4   8  -1   73.31   10.15
   3   8  -1  147.19   10.53
  -3  -8   1  141.04    9.21
  -2  -8   1  509.57   17.05
   2   8  -1  499.28   17.80
   1   8  -1  399.93   14.64
   0   8  -1  251.61   11.52
  -1   8  -1   54.02    7.34
  -2   8  -1 1692.69   38.59
  -3   8  -1   54.45    8.14
  -4   8  -1  221.43   13.33
  -5   8  -1  903.44   30.13
  -6   8  -1  148.30   14.67
  -7   8  -1  274.27   19.79
  -8   8  -1   -4.70    9.06
  -9   8  -1  302.10   23.87
 -10   8  -1   29.07   17.24
 -11   8  -1   29.07   20.12
 -12   8  -1  137.75   29.67
 -13   8  -1   -9.89   25.27
 -14   8  -1   64.35   35.56
 -15   8  -1   -1.65   34.49
 -16   8  -1  224.85   62.81
 -17   8  -1   32.36   75.05
  18   7  -1   -4.49   21.32
  17   7  -1  151.92   30.49
  16   7  -1   76.05   26.07
  15   7  -1  138.81   28.94
  14   7  -1   26.46   18.24
  13   7  -1  148.78   27.01
  12   7  -1  492.18   34.07
  11   7  -1  743.70   39.19
  10   7  -1  524.92   31.27
   9   7  -1   60.63   14.98
  -9  -7   1   95.03   11.90
   8   7  -1 1886.10   56.41
  -8  -7   1 1854.17   45.67
  -7  -7   1   95.69    9.80
   7   7  -1   88.45    9.63
   7   7  -1  102.01   15.11
   6   7  -1  133.31   13.48
  -6  -7   1  119.88    9.72
   6   7  -1  120.07    9.30
   5   7  -1  103.85    7.38
   5   7  -1   90.69    9.74
  -5  -7   1   99.36    8.04
   4   7  -1   23.35    6.87
  -4  -7   1   34.88    6.40
   4   7  -1   36.81    4.91
   3   7  -1 2948.99   61.50
  -3  -7   1 2965.49   59.13
  -2  -7   1  871.33   23.24
   2   7  -1  899.54   24.63
  -1  -7   1 6325.96  113.60
   1   7  -1 6347.48  111.40
   0   7  -1 7411.95  128.20
  -1   7  -1  256.68   11.32
  -2   7  -1  202.37   10.27
  -3   7  -1 1718.08   40.13
  -4   7  -1  198.60   12.08
  -5   7  -1   91.05   12.03
  -6   7  -1   -1.74    7.10
  -7   7  -1    9.78    9.97
   9  -7   1   53.98   14.22
  10  -7   1   27.16   15.08
  11  -7   1  285.69   25.61
  12  -7   1   39.20   16.39
 -14   7  -1   40.56   37.72
 -15   7  -1  484.50   74.82
 -16   7  -1   27.86   63.10
 -17   7  -1  743.16  157.54
  18   6  -1    3.18   21.50
  17   6  -1   29.41   21.49
  16   6  -1   10.63   18.99
  15   6  -1   32.81   20.53
  14   6  -1   30.69   18.67
  13   6  -1  149.86   25.38
  12   6  -1   22.01   16.54
  11   6  -1 1321.76   52.36
  10   6  -1  228.59   21.49
  -9  -6   1  546.41   22.06
   9   6  -1  574.29   30.34
  -8  -6   1   70.24   11.02
   8   6  -1   70.96   12.97
   7   6  -1 2469.67   54.70
   7   6  -1 2601.12   65.54
  -7  -6   1 2555.21   56.28
   6   6  -1    6.53    5.06
   6   6  -1   -1.74    6.76
  -6  -6   1    6.87    4.93
  -5  -6   1  645.85   20.50
   5   6  -1  680.86   19.13
   5   6  -1  663.63   25.25
   4   6  -1  141.51    7.04
  -4  -6   1  132.54    8.61
   4   6  -1  154.01   11.23
  -3  -6   1  186.82    9.69
   3   6  -1  189.66   11.21
   2   6  -1   62.35    7.37
  -2  -6   1   48.86    5.56
  -1  -6   1 1044.86   24.94
   1   6  -1 1016.46   24.51
   0   6  -1 1831.92   37.43
  -1   6  -1 1970.08   40.30
  -2   6  -1  193.70   10.22
  -3   6  -1  850.24   24.41
  -4   6  -1  225.05   13.11
  -5   6  -1  540.18   21.74
   6  -6   1    5.00    7.20
   7  -6   1 1075.97   37.58
   8  -6   1  429.65   24.86
   9  -6   1  -16.20    8.39
  10  -6   1    6.34   12.41
  11  -6   1  567.43   33.97
  12  -6   1   13.04   14.74
  13  -6   1  132.67   24.90
  14  -6   1  -15.14   15.58
 -16   6  -1   65.02   85.92
 -17   6  -1  374.83  150.25
  18   5  -1  -15.74   17.47
  17   5  -1   72.27   25.72
  16   5  -1   18.89   20.00
  15   5  -1  269.98   29.70
  14   5  -1   41.40   19.22
  13   5  -1  364.56   30.29
  12   5  -1   53.59   18.50
  11   5  -1  309.67   26.53
  10   5  -1  116.37   19.31
  -9  -5   1   14.05    7.87
   9   5  -1   14.70   10.52
   8   5  -1  244.26   19.55
  -8  -5   1  219.24   14.65
   7   5  -1  182.66   16.29
  -7  -5   1  163.25   11.94
   6   5  -1  154.57   10.30
  -6  -5   1  154.35   10.24
   6   5  -1  178.00   14.29
  -5  -5   1  623.64   19.67
   5   5  -1  615.08   23.78
   5   5  -1  607.05   18.26
   4   5  -1   50.54    8.22
  -4  -5   1   62.43    6.28
   4   5  -1   61.67    5.30
   3   5  -1  603.35   20.04
  -3  -5   1  653.21   18.27
   2   5  -1  456.54   14.93
  -2  -5   1  446.69   14.00
  -1  -5   1 1791.97   36.66
   1   5  -1 1777.49   35.99
   0   5  -1  143.02    6.89
  -1   5  -1  434.92   13.29
  -2   5  -1 2680.95   52.65
  -3   5  -1 3642.28   70.84
  -4   5  -1  282.45   14.50
   5  -5   1   51.11    9.54
   6  -5   1  392.16   20.63
   7  -5   1   -4.55    7.96
   8  -5   1   73.82   13.22
   9  -5   1   15.75    9.62
  10  -5   1   59.50   17.03
  11  -5   1  230.82   27.77
  12  -5   1  211.66   28.37
  13  -5   1   15.27   16.28
  14  -5   1    2.69   17.22
  15  -5   1  185.74   30.39
 -17   5  -1  272.86  254.31
  18   4  -1   39.26   25.37
  17   4  -1   31.98   20.92
  16   4  -1  167.68   30.56
  15   4  -1   29.63   20.02
  14   4  -1  234.98   30.57
  13   4  -1   35.97   17.05
  12   4  -1  295.22   26.78
  11   4  -1  547.53   33.43
  10   4  -1  148.16   21.09
 -10  -4   1  115.10   13.07
   9   4  -1  156.98   19.90
  -9  -4   1  147.28   12.79
   8   4  -1  159.65   17.02
  -8  -4   1  146.64   13.15
  -7  -4   1  113.22   10.37
   7   4  -1  124.89   14.00
   6   4  -1  399.17   20.48
  -6  -4   1  424.01   16.76
   5   4  -1  848.59   28.18
   5   4  -1  871.32   22.92
  -5  -4   1  821.24   23.66
   4   4  -1  359.83   16.01
  -4  -4   1  347.80   13.20
   4   4  -1  352.05   11.85
  -3  -4   1 1143.88   26.92
   3   4  -1 1166.16   29.45
  -2  -4   1 2820.59   53.71
   2   4  -1 2808.05   54.11
  -1  -4   1    4.40    2.32
   1   4  -1    8.21    2.59
   0  -4   1  442.25   12.38
   0   4  -1  456.94   12.28
  -1   4  -1   47.77    3.87
  -2   4  -1   72.51    6.48
  -3   4  -1 1193.74   30.12
   4  -4   1   10.40    5.62
   5  -4   1  442.43   19.98
   6  -4   1   -4.05    6.31
   7  -4   1  237.64   17.98
   8  -4   1   97.04   14.37
   9  -4   1    9.07   10.55
  10  -4   1   19.70   13.13
  11  -4   1   25.74   15.58
  12  -4   1   25.50   17.16
  13  -4   1  -11.50   14.58
  14  -4   1   83.93   23.22
  15  -4   1    2.58   17.45
  16  -4   1  120.95   29.09
  18   3  -1  -17.28   20.36
  17   3  -1    4.70   21.02
  16   3  -1   33.21   21.00
  15   3  -1   25.30   18.27
  14   3  -1  154.84   26.77
  13   3  -1   17.42   16.18
  12   3  -1  227.42   24.06
  11   3  -1  121.40   21.61
 -10  -3   1  737.95   28.08
  10   3  -1  752.55   35.96
   9   3  -1  237.62   19.93
  -9  -3   1  218.11   14.74
   8   3  -1 2492.35   65.93
  -8  -3   1 2480.66   57.22
  -7  -3   1  159.22   12.06
   7   3  -1  156.65   14.89
   6   3  -1  432.82   21.17
  -6  -3   1  432.20   17.12
   5   3  -1  304.40   16.04
  -5  -3   1  288.64   12.92
   4   3  -1  802.83   20.32
  -4  -3   1  829.61   22.05
   4   3  -1  806.47   24.96
   3   3  -1 1131.02   28.13
  -3  -3   1 1084.79   25.70
   3   3  -1 1091.63   22.81
  -2  -3   1  116.02    5.89
   2   3  -1  108.13    6.50
  -1  -3   1 1593.77   31.92
   1   3  -1 1607.34   31.29
   1  -3   1  602.32   15.20
  -1   3  -1  605.11   15.05
   2  -3   1    3.81    3.53
  -2   3  -1    3.98    3.33
   3  -3   1  683.03   21.07
   3  -3   1  690.93   21.24
   4  -3   1 1221.25   33.15
   5  -3   1   57.46    9.96
   6  -3   1  208.43   15.45
   7  -3   1  301.35   20.08
   8  -3   1 1234.59   43.11
   9  -3   1   91.70   16.68
  10  -3   1  420.11   27.82
  11  -3   1   -4.88   13.19
  12  -3   1   49.40   18.82
  13  -3   1    0.41   14.95
  14  -3   1   81.59   21.33
  15  -3   1   -8.49   17.89
  16  -3   1   11.19   18.74
  17  -3   1   51.06   25.62
  18   2  -1   78.03   27.23
  17   2  -1   12.22   18.03
  16   2  -1   97.27   25.64
  15   2  -1   34.80   19.75
  14   2  -1  237.21   26.53
  13   2  -1   42.19   17.75
  12   2  -1  217.41   27.71
  11   2  -1  244.38   23.39
 -10  -2   1  179.60   15.40
  10   2  -1  185.73   19.47
  -9  -2   1  102.95   13.17
   9   2  -1   80.79   15.35
   8   2  -1  146.21   18.26
  -8  -2   1  109.52   12.11
   7   2  -1  427.01   22.49
  -7  -2   1  401.84   17.92
  -6  -2   1  159.83   10.63
   6   2  -1  176.03   13.84
   5   2  -1   52.51    9.10
  -5  -2   1   34.26    6.54
  -4  -2   1  798.39   21.83
   4   2  -1  804.11   24.47
  -3  -2   1  339.23   12.12
   3   2  -1  347.60   13.56
   2   2  -1   39.07    3.94
  -2  -2   1   38.07    3.55
  -1   2  -1  623.87   14.99
   1  -2   1  631.78   15.11
   2  -2   1 1445.48   31.22
   2  -2   1 1486.62   31.88
   3  -2   1 3345.58   65.42
   3  -2   1 3316.84   63.63
   4  -2   1  859.77   25.64
   4  -2   1  843.85   26.28
   5  -2   1  169.18   12.23
   5  -2   1  161.11   12.55
   6  -2   1   12.98    6.51
   7  -2   1  402.80   22.67
   8  -2   1  826.64   34.31
   9  -2   1  149.51   19.61
  10  -2   1    9.95   11.77
  11  -2   1  105.34   20.54
  12  -2   1  215.64   28.60
  13  -2   1   74.58   21.34
  14  -2   1   69.06   22.03
  15  -2   1  -15.38   16.54
  16  -2   1    1.27   20.36
  17  -2   1   -5.76   18.04
  18  -2   1   43.99   26.59
  18   1  -1   -6.71   21.20
  17   1  -1  -16.09   17.87
  16   1  -1  -11.04   17.27
  15   1  -1  371.28   33.48
  14   1  -1  202.85   29.23
  13   1  -1  125.08   23.66
  12   1  -1  -23.89   11.04
  11   1  -1   13.42   13.74
 -10  -1   1   73.89   13.97
  10   1  -1   88.85   16.89
   9   1  -1  101.36   16.94
  -9  -1   1   96.28   13.57
  -8  -1   1  554.67   22.78
   8   1  -1  572.67   27.84
   7   1  -1  775.72   30.41
   6   1  -1   56.07   10.39
   5   1  -1 1053.66   31.36
   4   1  -1  991.55   27.87
   3   1  -1 4931.00   89.40
   2   1  -1   59.32    4.37
   2  -1   1  102.04    6.15
   2  -1   1   85.39    5.90
   3  -1   1 1245.47   29.58
   3  -1   1 1209.97   30.56
   4  -1   1 2297.30   51.29
   4  -1   1 2237.66   48.99
   5  -1   1  337.36   17.58
   5  -1   1  347.65   16.71
   6  -1   1  523.46   23.09
   6  -1   1  475.14   21.60
   7  -1   1   69.45   13.44
   8  -1   1  211.67   18.52
   9  -1   1   98.24   16.79
  10  -1   1  104.73   19.01
  11  -1   1  176.33   24.81
  12  -1   1   68.52   20.53
  13  -1   1   62.99   20.24
  14  -1   1   10.13   17.75
  15  -1   1   63.46   22.27
  16  -1   1   30.20   22.64
  17  -1   1   19.48   23.53
  18  -1   1   -7.07   20.94
  18   0  -1  -13.92   17.71
  17   0  -1    7.79   18.42
  16   0  -1    8.91   16.95
  15   0  -1  234.70   32.13
  14   0  -1   15.92   15.76
  13   0  -1   52.11   18.56
  12   0  -1  -23.86   11.58
  11   0  -1  242.83   23.40
 -10   0   1  -10.26    8.80
  10   0  -1   -6.97   10.21
   9   0  -1  266.86   20.73
   8   0  -1   11.50    9.58
   7   0  -1  349.55   20.18
   6   0  -1   -3.77    5.46
   5   0  -1    8.37    5.94
   4   0  -1   -1.63    4.09
   3   0  -1  796.72   21.61
   2   0  -1   -0.69    1.87
   2   0   1   -1.06    1.87
   2   0   1    2.86    2.98
   3   0   1 1363.15   33.54
   3   0   1 1428.29   32.07
   4   0   1   -1.59    5.14
   4   0   1    4.03    4.99
   5   0   1 2337.14   55.39
   5   0   1 2354.06   52.67
   6   0   1   -1.60    6.30
   6   0   1   -5.01    5.82
   7   0   1 1830.47   52.15
   7   0   1 1829.69   49.37
   8   0   1   -7.14    8.27
   9   0   1  313.97   22.97
  10   0   1   -0.62    8.41
  11   0   1  195.84   22.03
  12   0   1  -22.64   12.14
  13   0   1  -19.29   11.63
  14   0   1  -22.56   14.84
  15   0   1  -27.93   15.93
  16   0   1  -13.74   17.23
  17   0   1    2.02   19.52
  18   0   1   10.06   21.63
  18  -1  -1    3.83   21.36
  17  -1  -1   16.02   21.17
  16  -1  -1    1.20   18.64
  15  -1  -1  359.42   32.46
  14  -1  -1  179.91   28.08
  13  -1  -1   93.07   21.84
  12  -1  -1  -16.52   12.11
  11  -1  -1   14.56   13.11
  10  -1  -1   63.91   16.11
   9  -1  -1   93.27   16.54
   8  -1  -1  577.46   27.63
   7  -1  -1  785.43   30.29
   6  -1  -1   65.38   10.56
   5  -1  -1 1045.13   30.86
   4  -1  -1  971.28   27.07
   3  -1  -1 5031.20   90.65
   2  -1  -1   61.84    4.23
   2   1   1   86.45    5.34
   2   1   1   87.78    6.32
   3   1   1 1192.59   28.00
   3   1   1 1204.13   30.40
   4   1   1 2205.17   50.34
   4   1   1 2192.21   46.90
   5   1   1  326.85   15.68
   5   1   1  336.18   17.66
   6   1   1  526.07   23.99
   6   1   1  523.82   22.01
   7   1   1   54.66   12.42
  -7  -1  -1   68.17    8.84
   7   1   1   80.98   13.31
   8   1   1  208.45   17.40
  -8  -1  -1  195.58   12.63
   9   1   1   98.40   17.28
  10   1   1  101.43   19.44
  11   1   1  175.53   24.79
  12   1   1   81.76   21.44
  13   1   1   62.54   19.92
  14   1   1    1.38   14.49
  15   1   1   46.86   22.47
  16   1   1   31.02   22.17
  17   1   1   14.98   22.18
  18   1   1  -22.68   22.20
  18  -2  -1  109.26   29.44
  17  -2  -1   -2.09   18.54
  16  -2  -1   98.99   25.81
  15  -2  -1   47.86   20.46
  14  -2  -1  249.21   31.07
  13  -2  -1   26.08   17.21
  12  -2  -1  192.16   26.42
  11  -2  -1  242.04   23.26
  10  -2  -1  177.73   21.96
   9  -2  -1  100.40   16.57
   8  -2  -1  164.95   16.44
   7  -2  -1  467.80   23.11
   6  -2  -1  186.56   13.80
   5  -2  -1   44.32    8.63
   4  -2  -1  835.15   24.50
   3  -2  -1  340.24   12.82
   2  -2  -1   34.24    3.41
   2   2   1 1430.39   29.22
   2   2   1 1473.50   32.06
   3   2   1 3329.41   65.49
   3   2   1 3245.75   60.66
   4   2   1  872.86   26.73
   4   2   1  809.14   23.61
   5   2   1  164.83   12.14
   5   2   1  170.10   11.40
  -5  -2  -1  164.85    8.02
   6   2   1   11.38    7.99
   6   2   1   32.21    8.74
  -6  -2  -1   20.72    5.36
  -7  -2  -1  363.84   14.55
   7   2   1  382.67   20.07
   7   2   1  417.88   23.03
  -8  -2  -1  755.86   23.91
   8   2   1  810.97   34.54
   8   2   1  905.31   33.13
   9   2   1  125.26   18.78
  10   2   1   -3.68   10.96
  11   2   1   68.97   19.31
  12   2   1  190.72   27.48
  13   2   1   38.94   18.41
  14   2   1   74.61   22.44
  15   2   1  -10.77   17.18
  16   2   1    6.66   18.84
  17   2   1  -28.47   16.18
  18  -3  -1   -0.68   20.12
  17  -3  -1   55.38   24.98
  16  -3  -1    7.86   17.16
  15  -3  -1   26.05   19.03
  14  -3  -1  200.83   28.75
  13  -3  -1   12.59   14.65
  12  -3  -1  246.82   25.15
  11  -3  -1  116.28   21.33
  10  -3  -1  717.04   34.66
   9  -3  -1  246.20   19.83
   8  -3  -1 2486.98   64.59
   7  -3  -1  161.76   14.53
   6  -3  -1  462.34   20.91
   5  -3  -1  276.82   14.73
   4  -3  -1  890.37   25.37
   3  -3  -1 1102.55   26.58
  -2   3   1  109.32    5.59
   1   3   1  589.51   14.95
   2   3   1    6.63    3.15
   2   3   1    4.41    2.72
   3   3   1  660.54   21.24
   3   3   1  686.53   18.71
  -4  -3  -1 1173.72   25.47
   4   3   1 1221.44   29.95
   4   3   1 1227.52   33.87
  -5  -3  -1   53.46    5.27
   5   3   1   45.26    9.24
   5   3   1   63.41    9.03
  -6  -3  -1  198.58    9.49
   6   3   1  197.87   15.21
   6   3   1  200.75   13.33
  -7  -3  -1  261.56   12.23
   7   3   1  293.03   17.62
   7   3   1  315.28   20.44
  -8  -3  -1 1186.11   30.54
   8   3   1 1202.99   43.06
   8   3   1 1191.35   38.99
   9   3   1  103.28   15.94
   9   3   1   76.95   16.16
  10   3   1  351.15   24.77
  11   3   1    8.91   14.04
  12   3   1   32.85   18.32
  13   3   1  -18.29   13.94
  14   3   1   68.15   22.19
  15   3   1  -26.97   14.73
  16   3   1   38.09   22.90
  17   3   1   62.42   24.60
  18   3   1   11.28   21.54
  18  -4  -1   33.75   22.71
  17  -4  -1   25.76   20.36
  16  -4  -1  221.56   33.38
  15  -4  -1   27.49   18.78
  14  -4  -1  248.27   31.64
  13  -4  -1    0.56   13.96
  12  -4  -1  333.14   27.51
  11  -4  -1  535.91   32.54
  10  -4  -1  143.08   20.38
   9  -4  -1  157.35   17.03
   8  -4  -1  159.50   16.21
   7  -4  -1  134.98   13.78
   6  -4  -1  425.66   20.18
   5  -4  -1  867.05   27.39
   4  -4  -1  348.15   14.79
   3  -4  -1 1197.72   28.23
  -2   4   1 2848.42   52.51
   0   4   1  435.13   11.15
   1   4   1   45.84    4.12
   1   4   1   45.42    3.52
   2   4   1   71.14    6.62
   2   4   1   71.39    4.99
   3   4   1 1202.20   31.18
   3   4   1 1204.20   27.13
  -3  -4  -1 1168.18   24.77
   4   4   1   14.66    4.98
  -4  -4  -1   13.20    3.60
   4   4   1   18.29    6.28
   5   4   1  441.05   17.39
   5   4   1  431.58   20.37
  -5  -4  -1  427.62   13.19
  -6  -4  -1    5.18    4.08
   6   4   1    5.87    7.66
   6   4   1   -1.10    5.43
   7   4   1  311.40   17.99
  -7  -4  -1  242.32   11.59
   7   4   1  229.18   18.12
  -8  -4  -1   78.56    9.83
   8   4   1  114.23   15.25
   8   4   1   63.16   14.50
   9   4   1    0.68    8.64
   9   4   1   -7.35    9.22
  10   4   1    9.20   11.87
  11   4   1   56.59   19.21
  12   4   1   45.78   19.16
  13   4   1   -4.99   15.03
  14   4   1  105.25   23.72
  15   4   1   47.53   20.77
  16   4   1  186.91   32.59
  17   4   1   13.89   22.28
  17  -5  -1   72.92   23.40
  16  -5  -1   38.53   20.22
  15  -5  -1  300.57   30.25
  14  -5  -1   29.46   18.34
  13  -5  -1  391.37   30.96
  12  -5  -1   48.06   17.39
  11  -5  -1  296.62   25.55
  10  -5  -1  102.62   17.33
   9  -5  -1   23.20   11.33
   8  -5  -1  266.14   19.76
   7  -5  -1  193.27   16.44
   6  -5  -1  176.75   13.47
   5  -5  -1  692.01   24.02
   4  -5  -1   57.38    7.82
  -3   5   1  691.84   19.59
  -2   5   1  479.10   13.91
  -1   5   1 1748.08   33.89
   0   5   1  149.97    6.37
   0   5   1  142.16    6.07
   1   5   1  445.73   12.08
   1   5   1  460.10   13.72
   2   5   1 2593.93   52.55
   2   5   1 2634.39   47.72
   3   5   1 3593.41   64.46
   3   5   1 3600.52   71.23
  -3  -5  -1 3509.00   65.02
   4   5   1  282.93   12.44
  -4  -5  -1  278.10    9.92
   4   5   1  278.84   15.08
   5   5   1   57.22    8.60
   5   5   1   47.66    9.76
  -5  -5  -1   55.06    5.33
   6   5   1  372.44   17.50
  -6  -5  -1  367.37   13.23
   6   5   1  371.51   20.87
   7   5   1    6.65    8.94
   7   5   1    1.70    7.14
  -7  -5  -1   -4.89    4.43
   8   5   1   52.62   11.76
   8   5   1   75.35   13.23
  -8  -5  -1   74.79    9.30
   9   5   1    7.10   10.48
   9   5   1   10.70    8.95
  10   5   1   71.76   17.89
  11   5   1  219.33   23.63
  12   5   1  177.15   27.39
  13   5   1   17.73   15.45
  14   5   1   24.19   19.14
  15   5   1  213.15   32.53
  16   5   1   30.05   20.05
  17   5   1   57.24   24.07
  15  -6  -1   18.23   17.95
  14  -6  -1   18.17   16.82
  13  -6  -1  194.73   27.72
  12  -6  -1   28.99   14.82
  11  -6  -1 1380.91   52.22
  10  -6  -1  242.03   21.97
   9  -6  -1  628.34   30.62
   8  -6  -1   83.01   14.38
   7  -6  -1 2783.70   66.97
   6  -6  -1   -2.14    5.76
  -4   6   1  142.17    9.65
  -3   6   1  188.71    9.79
  -2   6   1   54.93    5.39
  -1   6   1 1043.07   23.23
   0   6   1 1870.95   36.45
   0   6   1 1846.27   35.62
   1   6   1 1905.57   39.36
   1   6   1 1937.37   36.63
   2   6   1  191.88    8.37
   2   6   1  183.37   10.41
  -3  -6  -1  808.24   19.84
   3   6   1  807.06   20.69
   3   6   1  823.22   25.20
   4   6   1  224.83   13.92
  -4  -6  -1  206.05    8.95
   4   6   1  230.69   11.15
  -5  -6  -1  526.90   15.88
   5   6   1  523.34   22.99
   5   6   1  557.69   19.57
  -6  -6  -1    4.90    4.45
   6   6   1    1.83    5.46
   6   6   1    2.65    7.21
   7   6   1 1126.71   34.16
  -7  -6  -1 1002.12   26.56
   7   6   1  996.50   37.30
  -8  -6  -1  409.08   15.94
   8   6   1  410.79   21.50
   8   6   1  424.35   25.76
   9   6   1   -3.37    8.23
   9   6   1   -5.59    9.59
  10   6   1   22.87   11.87
  10   6   1   25.50   13.99
  11   6   1  539.75   34.14
  12   6   1  -10.72   13.00
  13   6   1  141.79   26.72
  14   6   1    1.79   16.62
  15   6   1    4.46   16.89
  16   6   1   45.50   22.90
  17   6   1   34.13   23.25
 -17   7   1 1410.10  238.67
 -16   7   1  194.67   94.83
  14  -7  -1   22.56   17.43
  13  -7  -1  171.36   25.97
  12  -7  -1  537.51   33.21
  11  -7  -1  859.28   40.42
  10  -7  -1  555.22   30.94
   9  -7  -1   69.03   14.62
   8  -7  -1 2065.83   57.19
   7  -7  -1  101.62   14.46
  -6   7   1  108.32   11.72
  -5   7   1   98.43    9.94
  -4   7   1   26.88    6.46
  -3   7   1 3107.71   60.59
  -2   7   1  947.47   23.23
  -1   7   1 6392.51  110.33
   0   7   1 7635.49  124.27
   0   7   1 7362.92  127.75
   1   7   1  251.15    9.61
   1   7   1  243.06   10.85
   2   7   1  210.80    9.02
   2   7   1  201.04   11.08
  -3  -7  -1 1682.49   35.58
   3   7   1 1696.33   41.31
   3   7   1 1685.29   35.08
  -4  -7  -1  180.05    8.82
   4   7   1  173.05    9.50
   4   7   1  198.00   13.34
   5   7   1   90.04    8.58
  -5  -7  -1   93.72    7.15
   5   7   1  111.52   11.74
   6   7   1   -3.87    6.41
   6   7   1   -4.64    4.88
  -6  -7  -1    3.17    4.54
   7   7   1   20.09    8.53
   7   7   1    5.90    9.34
   8   7   1   63.61   11.77
   8   7   1   64.13   13.19
  -8  -7  -1   76.74    9.30
   9   7   1   69.55   13.89
   9   7   1   38.36   13.83
  10   7   1   54.24   13.80
  10   7   1   48.13   15.93
  11   7   1  260.33   25.34
  12   7   1   32.25   17.24
  13   7   1   17.79   17.42
  14   7   1   10.88   16.71
  15   7   1  158.06   30.38
  16   7   1    8.80   18.73
  17   7   1  134.58   30.93
 -17   8   1  176.92  128.26
 -16   8   1  994.23  104.31
 -15   8   1   32.78   48.18
 -14   8   1  349.63   56.42
  -8   8   1  472.04   25.66
  -7   8   1  128.72   13.85
  -6   8   1   51.50   10.33
  -5   8   1  866.35   27.66
  -4   8   1   83.58    8.19
  -3   8   1  168.76    9.78
  -2   8   1  522.86   16.41
  -1   8   1  302.55   11.55
   0   8   1  250.87   10.15
   1   8   1   60.88    7.14
   1   8   1   53.76    6.19
   2   8   1 1544.15   37.53
   2   8   1 1643.52   33.10
   3   8   1   39.19    7.97
   3   8   1   60.52    7.01
  -4  -8  -1  210.84    9.81
   4   8   1  210.33   13.50
   4   8   1  209.17   10.66
  -5  -8  -1  854.06   23.13
   5   8   1  872.63   31.36
   5   8   1  878.00   25.34
  -6  -8  -1  127.53    9.08
   6   8   1  152.52   14.80
   6   8   1  121.28   10.68
  -7  -8  -1  329.91   13.94
   7   8   1  275.34   20.36
   7   8   1  278.44   16.62
   8   8   1   -3.41    6.77
   8   8   1   -6.24    8.86
  -8  -8  -1   -1.43    5.41
   9   8   1  304.10   19.86
   9   8   1  310.30   24.04
  10   8   1   20.61   11.87
  10   8   1   20.44   13.91
  11   8   1   23.60   16.01
  12   8   1  102.48   23.22
  13   8   1    0.71   15.34
  14   8   1   52.64   21.46
  15   8   1   26.91   20.97
  16   8   1   53.61   24.06
  17   8   1   -3.78   19.68
 -18   9   1 -260.50  210.71
 -17   9   1   35.23   91.06
 -16   9   1   47.67   58.91
 -15   9   1  280.61   60.07
 -14   9   1   16.05   34.41
 -13   9   1   58.03   28.58
 -12   9   1 1040.57   53.41
 -11   9   1  159.70   26.61
 -10   9   1  438.49   29.09
  -9   9   1  -13.78    9.30
  -8   9   1  859.23   34.29
  -7   9   1  367.04   20.87
  -6   9   1  916.17   30.81
  -5   9   1  149.16   11.81
  -4   9   1  344.80   15.49
  -3   9   1  361.28   14.72
  -2   9   1  216.35   10.90
  -1   9   1   63.46    6.25
   0   9   1  596.28   17.76
   0   9   1  577.97   16.97
   1   9   1 1470.21   31.12
   1   9   1 1431.99   34.10
   2   9   1 2093.48   47.51
   2   9   1 2176.92   42.34
   3   9   1  440.35   18.98
   3   9   1  468.83   15.16
   4   9   1  176.90    9.92
   4   9   1  187.89   13.69
  -4  -9  -1  179.99    9.85
   5   9   1  302.26   14.28
   5   9   1  276.34   17.97
  -5  -9  -1  315.72   13.17
   6   9   1 2331.95   51.69
  -6  -9  -1 2235.67   48.33
   6   9   1 2227.53   59.98
   7   9   1   -6.15    8.09
   7   9   1   -2.84    6.13
  -7  -9  -1   -8.86    4.63
  -8  -9  -1  208.54   11.75
   8   9   1  192.21   15.04
   8   9   1  205.63   19.46
   9   9   1    4.97   10.80
   9   9   1    1.38    9.14
  10   9   1  126.21   21.97
  10   9   1  163.53   17.36
  11   9   1   32.91   14.12
  11   9   1   18.52   14.69
  12   9   1  303.97   28.22
  13   9   1    2.74   16.57
  14   9   1   24.59   20.47
  15   9   1  -10.98   15.17
  16   9   1   -4.32   20.17
  17   9   1  -12.20   20.34
 -18  10   1  113.72  133.00
 -17  10   1   61.90   64.30
 -16  10   1  241.78   60.35
 -15  10   1    0.29   35.14
 -14  10   1  -10.66   28.10
 -13  10   1  134.95   29.96
 -12  10   1   96.35   27.72
 -11  10   1  990.73   46.31
 -10  10   1  110.77   20.68
  -9  10   1  184.38   18.54
  -8  10   1    4.87    9.93
  -7  10   1 1364.45   42.06
  -6  10   1   50.37   10.59
  -5  10   1   45.51    9.22
  -4  10   1  238.41   13.32
  -3  10   1    3.66    4.55
  -2  10   1 1005.44   26.61
  -1  10   1  417.82   15.10
   0  10   1 1082.65   27.17
   0  10   1 1086.92   26.31
   1  10   1 2416.53   47.09
   1  10   1 2418.96   51.13
   2  10   1    5.82    4.21
   2  10   1    0.55    4.62
   3  10   1  273.97   11.77
   3  10   1  285.99   15.54
   4  10   1  209.83   14.98
   4  10   1  238.47   11.64
  -5 -10  -1  138.33    9.56
   5  10   1  123.35   13.35
   5  10   1  110.86    9.35
   6  10   1  288.86   15.82
   6  10   1  295.94   19.35
  -6 -10  -1  289.01   13.60
   7  10   1  121.67   11.85
   7  10   1  125.58   14.19
  -7 -10  -1  133.32   10.12
  -8 -10  -1    7.12    6.15
   8  10   1    9.22   10.81
   8  10   1    3.87    7.22
   9  10   1    7.21   11.69
   9  10   1   -2.07    9.48
  10  10   1  153.79   19.75
  10  10   1  159.12   23.41
  11  10   1  211.75   23.66
  12  10   1  150.70   26.01
  13  10   1   19.90   18.12
  14  10   1   77.62   22.43
  15  10   1   -5.91   19.36
  16  10   1   80.97   27.25
  17  10   1   21.60   23.08
 -18  11   1  -82.47  103.13
 -17  11   1  365.49   87.30
 -16  11   1  312.36   64.03
 -15  11   1  532.76   64.59
 -14  11   1   -7.52   26.24
 -13  11   1  316.59   40.01
 -12  11   1    3.57   18.72
 -11  11   1  403.95   31.26
 -10  11   1   -1.13   12.59
  -9  11   1   -3.68    9.88
  -8  11   1   58.19   13.50
  -7  11   1  123.17   16.03
  -6  11   1   38.76    9.94
  -5  11   1   13.89    7.47
  -4  11   1 1669.33   41.62
  -3  11   1 2083.77   46.89
  -2  11   1 1624.76   38.04
  -1  11   1 3547.01   68.96
   0  11   1 1070.08   26.77
   0  11   1 1045.69   27.61
   1  11   1   16.80    5.02
   1  11   1   24.30    6.29
   2  11   1   47.96    8.42
   2  11   1   40.69    6.85
   3  11   1 1406.30   31.99
   3  11   1 1352.07   38.21
   4  11   1 1030.72   34.36
   4  11   1 1085.61   27.67
  -5 -11  -1   65.71    7.58
   5  11   1   56.80    8.83
   5  11   1   67.16   12.93
   6  11   1  245.87   18.76
   6  11   1  244.42   14.43
  -6 -11  -1  228.41   12.61
   7  11   1  270.26   20.52
   7  11   1  286.99   16.58
  -7 -11  -1  270.71   13.95
   8  11   1  538.70   24.05
  -8 -11  -1  518.13   19.61
   8  11   1  509.71   29.39
   9  11   1   21.31   13.15
   9  11   1   -4.76    8.37
  10  11   1   67.69   15.52
  10  11   1   69.00   18.21
  11  11   1   85.98   21.55
  12  11   1   98.21   23.17
  13  11   1   94.93   24.12
  14  11   1    9.86   18.45
  15  11   1  112.84   28.13
  16  11   1    3.14   19.02
  17  11   1   36.93   26.17
 -17  12   1   -6.91   56.80
 -16  12   1  291.91   59.08
 -15  12   1  127.17   38.01
 -14  12   1   -2.92   24.89
 -13  12   1  259.40   35.81
 -12  12   1  211.21   30.84
 -11  12   1   16.64   19.20
 -10  12   1   -9.24   11.42
  -9  12   1  683.16   32.37
  -8  12   1  127.93   17.17
  -7  12   1  457.84   24.09
  -6  12   1    0.51    6.87
  -5  12   1 1090.34   33.43
  -4  12   1  298.51   15.80
  -3  12   1 1468.06   37.42
  -2  12   1   17.28    6.14
  -1  12   1 1090.15   29.06
  -1  12   1 1006.85   27.99
   0  12   1  269.69   12.96
   0  12   1  272.09   12.62
   1  12   1 1184.85   31.88
   1  12   1 1147.77   28.35
   2  12   1   80.93   10.70
   2  12   1   66.47    7.03
   3  12   1 1350.63   38.57
   3  12   1 1333.84   31.79
   4  12   1  154.80   14.19
   4  12   1  150.35   10.08
   5  12   1 1778.88   41.25
   5  12   1 1751.60   50.73
   6  12   1  792.86   33.21
   6  12   1  719.85   24.78
  -6 -12  -1  721.10   23.74
  -7 -12  -1  440.42   17.94
   7  12   1  422.66   19.76
   7  12   1  390.07   24.72
   8  12   1   10.50   11.08
  -8 -12  -1   14.00    7.17
   8  12   1   20.96    8.57
   9  12   1  849.74   40.05
   9  12   1  850.52   32.94
  10  12   1  -12.71   11.99
  11  12   1  201.76   22.70
  12  12   1  -13.72   13.71
  13  12   1   65.26   22.18
  14  12   1   -1.89   18.14
  15  12   1   24.43   20.75
  16  12   1   11.65   20.15
  17  12   1  -22.24   20.56
 -17  13   1   99.64   50.88
 -16  13   1   44.00   39.60
 -15  13   1   21.34   25.65
 -14  13   1   17.15   25.33
 -13  13   1  192.07   31.74
 -12  13   1   80.39   21.93
 -11  13   1   34.53   19.36
 -10  13   1  159.67   23.15
  -9  13   1   30.40   12.85
  -8  13   1  280.65   19.98
  -7  13   1  428.47   22.91
  -6  13   1  484.64   23.12
  -5  13   1   73.57   11.39
  -4  13   1  154.08   12.13
  -3  13   1   18.36    7.06
  -2  13   1  839.37   25.69
  -1  13   1  415.89   16.84
  -1  13   1  421.47   17.29
   0  13   1  463.54   17.37
   0  13   1  494.62   18.50
   1  13   1 3376.49   69.51
   1  13   1 3310.13   63.85
   2  13   1  753.53   26.25
   2  13   1  749.64   21.83
   3  13   1   33.00    6.95
   3  13   1   34.00    9.26
   4  13   1  356.94   15.40
   4  13   1  378.67   20.95
   5  13   1 1487.93   46.09
   5  13   1 1414.48   36.09
   6  13   1  295.82   21.09
   6  13   1  278.27   15.34
  -7 -13  -1   75.13   10.30
   7  13   1   54.17   14.29
   7  13   1   46.06    9.80
  -8 -13  -1  170.41   12.52
   8  13   1  176.25   22.56
   8  13   1  170.82   14.36
   9  13   1   41.24   14.68
   9  13   1   38.25   11.52
  10  13   1  187.07   20.79
  11  13   1    7.65   14.92
  12  13   1    6.17   15.24
  13  13   1  355.51   32.44
  14  13   1   13.71   18.42
  15  13   1    2.76   16.83
  16  13   1  -12.24   19.79
  17  13   1   22.22   25.36
 -17  14   1  -22.46   36.46
 -16  14   1  134.98   43.36
 -15  14   1   19.14   26.39
 -14  14   1  189.86   36.48
 -13  14   1   26.19   19.81
 -12  14   1   39.46   19.42
 -11  14   1    9.44   14.94
 -10  14   1   85.31   20.37
  -9  14   1  157.53   17.64
  -8  14   1  128.77   18.46
  -7  14   1   -3.49    8.13
  -6  14   1    0.96    8.29
  -5  14   1  304.68   18.08
  -4  14   1  339.14   17.97
  -3  14   1  202.33   13.45
  -2  14   1 1129.01   32.08
  -1  14   1   27.12    7.23
  -1  14   1   41.03    7.91
   0  14   1 1105.22   31.14
   0  14   1 1130.92   30.00
   1  14   1 2678.11   54.63
   1  14   1 2732.61   59.99
   2  14   1   11.32    7.42
   2  14   1   13.87    5.55
   3  14   1   10.87    8.56
   3  14   1   22.01    6.59
   4  14   1  794.50   24.18
   4  14   1  756.26   30.31
   5  14   1   77.88   10.87
   6  14   1   41.09   10.99
   6  14   1   24.44    8.10
   7  14   1  -14.28    8.32
   7  14   1    2.39    6.87
   8  14   1    5.42    7.69
   8  14   1    6.32   10.13
   9  14   1  283.61   24.78
  10  14   1   72.49   19.64
  11  14   1  -10.06   13.18
  12  14   1  152.02   27.53
  13  14   1  185.63   30.30
  14  14   1  122.36   27.89
  15  14   1   35.75   22.08
  16  14   1   15.50   22.95
  17  14   1   -1.27   24.79
 -17  15   1  -42.32   39.91
 -16  15   1   66.82   32.90
 -15  15   1   51.33   28.52
 -14  15   1   75.65   28.55
 -13  15   1    4.19   16.83
 -12  15   1   23.40   18.62
 -11  15   1   -1.83   15.08
 -10  15   1  282.97   24.33
  -9  15   1   82.76   17.25
  -8  15   1   63.40   14.20
  -7  15   1   44.10   11.93
  -6  15   1  857.71   32.16
  -5  15   1   -2.06    7.60
  -4  15   1  647.68   25.11
  -3  15   1  297.32   16.35
  -2  15   1 1570.22   40.49
  -1  15   1 1367.50   36.09
  -1  15   1 1322.14   36.08
   0  15   1  580.18   20.77
   0  15   1  591.66   22.00
   2  15   1  439.42   17.14
   2  15   1  414.31   20.35
   3  15   1   57.84    9.18
   3  15   1   46.49   11.26
   4  15   1  884.98   33.49
   4  15   1  864.91   26.04
   5  15   1    4.61    6.87
   5  15   1   13.88    9.77
   6  15   1  674.45   32.33
   6  15   1  707.16   24.58
   7  15   1  -11.40    8.37
   7  15   1    5.24    7.29
   8  15   1  502.40   23.15
   8  15   1  489.29   30.29
   9  15   1   38.15   14.79
  10  15   1  130.49   23.70
  11  15   1    7.47   14.75
  12  15   1   73.74   22.36
  13  15   1   35.86   20.52
  14  15   1   27.79   21.98
  15  15   1   -7.14   18.36
  16  15   1   32.99   24.42
 -17  16   1   -7.88   38.02
 -16  16   1   -2.92   27.50
 -15  16   1  163.23   36.93
 -14  16   1  301.96   39.93
 -13  16   1   -5.76   15.07
 -12  16   1    8.25   15.81
 -11  16   1  -21.29   12.89
 -10  16   1   71.23   17.95
  -9  16   1   78.70   16.54
  -8  16   1  -13.84    8.44
  -7  16   1   27.21   10.62
  -6  16   1  332.54   20.45
  -5  16   1  114.95   12.76
  -4  16   1   -4.74    6.55
  -3  16   1  553.07   22.77
  -2  16   1 1063.53   32.20
   0  16   1  218.87   14.13
   0  16   1  201.67   13.51
   2  16   1 2407.91   51.41
   2  16   1 2422.12   58.80
   3  16   1  242.82   17.06
   3  16   1  255.57   13.36
   4  16   1  652.87   22.52
   4  16   1  624.45   28.19
   5  16   1  974.97   29.32
   5  16   1 1029.47   38.77
   6  16   1  298.34   22.21
   6  16   1  285.29   16.08
   7  16   1  202.68   14.19
   7  16   1  191.00   19.71
   8  16   1  234.94   22.22
   9  16   1  204.15   22.54
  10  16   1   -1.15   14.58
  11  16   1   -7.27   14.64
  12  16   1   42.68   19.16
  13  16   1   37.68   21.19
  14  16   1  101.98   28.05
  15  16   1   -1.09   19.57
  16  16   1  150.29   33.80
 -17  17   1  112.52   37.69
 -16  17   1  -35.30   26.40
 -15  17   1   45.46   27.55
 -14  17   1   36.41   23.62
 -13  17   1  176.95   29.01
 -12  17   1   21.89   16.96
 -11  17   1  -14.09   12.71
 -10  17   1  154.49   24.02
  -9  17   1  111.86   19.09
  -8  17   1   42.30   13.31
  -7  17   1    7.78   10.34
  -6  17   1  398.99   22.69
  -5  17   1  849.84   31.75
  -4  17   1   49.88   11.02
  -3  17   1  223.83   15.01
  -2  17   1   21.74    8.46
  -1  17   1 1458.43   39.65
  -1  17   1 1375.77   38.64
   0  17   1  545.23   21.05
   0  17   1  519.24   21.94
   1  17   1 1656.40   45.28
   1  17   1 1745.00   41.42
   2  17   1   21.24    8.34
   3  17   1    3.32    6.05
   3  17   1    6.98    7.71
   4  17   1  708.32   23.90
   4  17   1  706.31   30.79
   5  17   1 1225.40   43.75
   5  17   1 1250.59   34.33
   6  17   1   63.30   10.95
   6  17   1   51.20   14.43
   7  17   1    2.99    6.83
   7  17   1   -4.35    7.76
   8  17   1   11.91   12.44
   9  17   1   34.11   15.88
  10  17   1   77.48   20.87
  11  17   1  -24.00   13.14
  12  17   1  280.75   29.64
  13  17   1  276.29   31.10
  14  17   1    4.96   20.33
  15  17   1   27.51   23.33
  16  17   1   20.17   25.13
 -17  18   1   23.22   36.66
 -16  18   1    2.82   29.06
 -15  18   1   -3.70   25.29
 -14  18   1  125.40   29.58
 -13  18   1   36.82   20.68
 -12  18   1   -3.35   14.20
 -11  18   1   42.87   18.91
 -10  18   1   38.51   16.80
  -9  18   1 1129.38   43.78
  -8  18   1  -10.74   10.04
  -7  18   1  413.54   24.02
  -6  18   1   93.84   15.18
  -5  18   1  214.91   17.55
  -4  18   1   -0.64    7.68
  -3  18   1  604.51   24.88
  -2  18   1   16.26    8.19
  -1  18   1  824.82   28.82
  -1  18   1  790.68   28.06
   0  18   1  561.79   22.26
   0  18   1  542.64   23.04
   2  18   1    9.06    7.58
   2  18   1   -3.28    5.41
   3  18   1  136.14   10.88
   3  18   1  154.87   14.73
   4  18   1   34.42   11.79
   4  18   1   44.16    9.37
   5  18   1  226.50   19.46
   5  18   1  188.36   13.38
   6  18   1    2.17    6.31
   6  18   1   -8.70    8.94
   7  18   1   -5.12    9.83
   8  18   1   -2.16   11.95
   9  18   1  909.51   44.50
  10  18   1   63.56   20.14
  11  18   1  121.06   25.47
  12  18   1   45.86   20.05
  13  18   1  321.06   33.09
  14  18   1   -0.02   20.19
  15  18   1   48.53   25.32
  16  18   1   25.69   25.53
 -16  19   1   14.53   29.24
 -15  19   1   21.21   26.79
 -14  19   1   13.52   22.90
 -13  19   1    8.13   18.68
 -12  19   1    6.19   16.25
 -11  19   1  211.97   27.30
 -10  19   1  595.08   34.07
  -9  19   1   38.08   15.91
  -8  19   1   81.36   16.66
  -7  19   1    4.72   10.18
  -6  19   1   69.98   13.73
  -5  19   1  351.94   21.28
  -4  19   1  220.44   16.78
  -3  19   1  256.45   16.95
  -2  19   1    3.75    7.63
  -1  19   1  158.45   13.23
  -1  19   1  162.41   13.65
   0  19   1  119.16   11.81
   1  19   1  297.12   18.29
   1  19   1  301.69   16.02
   2  19   1   60.34    9.98
   2  19   1   72.50   13.08
   3  19   1  449.00   24.13
   3  19   1  454.23   19.44
   4  19   1   65.40   10.62
   4  19   1   87.28   15.23
   5  19   1   56.47   14.70
   5  19   1   46.59   10.13
   6  19   1   19.81    8.52
   6  19   1   28.89   13.37
   7  19   1   62.04   16.56
   8  19   1   39.71   16.37
   9  19   1   46.95   15.49
  10  19   1   50.08   19.70
  11  19   1   19.48   16.90
  12  19   1   63.01   22.54
  13  19   1   56.65   24.91
  14  19   1   11.55   22.19
  15  19   1   57.08   26.45
  16  19   1   68.33   28.56
 -16  20   1  115.81   29.67
 -15  20   1   -9.06   21.93
 -14  20   1   85.84   27.58
 -13  20   1   64.65   22.65
 -12  20   1   -2.65   15.68
 -11  20   1   27.98   16.62
 -10  20   1  259.70   24.35
  -9  20   1   61.47   18.19
  -8  20   1  108.63   18.81
  -7  20   1    5.97   11.05
  -6  20   1  519.42   27.00
  -5  20   1   73.62   14.57
  -4  20   1  540.33   25.38
  -3  20   1   12.76    9.61
  -2  20   1  492.06   22.97
  -2  20   1  465.24   23.82
  -1  20   1  164.54   18.16
  -1  20   1  149.69   13.59
   0  20   1    6.18    7.41
   0  20   1    5.71    7.44
   1  20   1   25.73    7.89
   1  20   1   37.85   10.39
   2  20   1  345.45   17.35
   2  20   1  338.26   20.72
   3  20   1  107.78   15.84
   3  20   1   94.52   12.11
   4  20   1  211.43   14.40
   4  20   1  245.22   19.65
   5  20   1   -0.24   10.02
   5  20   1    0.85    7.01
   6  20   1  100.83   18.72
   7  20   1   36.60   15.35
   8  20   1  445.82   31.37
   9  20   1   53.18   17.49
  10  20   1   38.53   17.69
  11  20   1  148.23   26.87
  12  20   1   31.36   19.97
  13  20   1   70.28   26.90
  14  20   1   91.23   28.24
  15  20   1   15.65   22.14
  16  20   1  163.94   34.72
 -16  21   1   52.39   29.48
 -15  21   1   37.09   20.89
 -14  21   1  -34.90   18.02
 -13  21   1   14.29   18.79
 -12  21   1  166.79   26.85
 -11  21   1    2.75   15.41
 -10  21   1  267.50   25.20
  -9  21   1  -10.17   12.42
  -8  21   1  104.69   19.32
  -7  21   1   20.47   13.28
  -6  21   1  559.57   28.40
  -5  21   1  388.57   22.79
  -4  21   1   36.93   11.78
  -3  21   1   26.77   10.53
  -2  21   1  150.73   15.10
  -2  21   1  177.61   14.88
  -1  21   1   37.07   10.48
  -1  21   1   30.77   11.26
   0  21   1  104.04   13.26
   0  21   1  123.83   15.24
   1  21   1   16.60    8.11
   1  21   1   26.73   11.23
   2  21   1  438.20   20.05
   2  21   1  483.60   25.10
   3  21   1   57.83   10.96
   3  21   1   61.76   14.18
   4  21   1  598.78   23.51
   4  21   1  617.37   30.90
   5  21   1   -5.58    7.22
   5  21   1   -4.23   10.30
   6  21   1  401.83   27.55
   7  21   1   44.67   16.55
   8  21   1  176.41   25.99
   9  21   1   -1.80   11.01
  10  21   1  258.05   27.38
  11  21   1  -11.25   15.03
  12  21   1  410.63   35.82
  13  21   1   19.75   22.28
  14  21   1  -18.80   18.72
  15  21   1  -18.05   21.13
 -16  22   1  114.91   36.38
 -15  22   1    1.99   21.85
 -14  22   1  -22.27   19.90
 -13  22   1   77.19   23.67
 -12  22   1    2.48   16.42
 -11  22   1   25.30   17.59
 -10  22   1   92.63   21.29
  -9  22   1  224.32   22.96
  -8  22   1   56.72   18.53
  -7  22   1  276.77   22.22
  -6  22   1  159.11   17.11
  -5  22   1   22.87   10.98
  -4  22   1   -7.80    8.74
  -3  22   1  130.02   17.27
  -2  22   1  363.89   21.89
  -2  22   1  345.11   20.26
  -1  22   1  164.73   18.29
  -1  22   1  117.44   13.02
   0  22   1   24.33    8.85
   0  22   1   13.33    8.80
   1  22   1    5.27    7.65
   1  22   1   11.29    9.26
   2  22   1  988.86   37.54
   2  22   1  979.39   31.43
   3  22   1   52.11   10.82
   3  22   1   65.35   15.01
   4  22   1  512.39   22.12
   4  22   1  495.34   28.24
   5  22   1   -2.05   10.18
   6  22   1   32.36   14.95
   7  22   1    4.10   12.61
   8  22   1   61.20   19.97
   9  22   1  217.62   29.85
  10  22   1   27.45   19.48
  11  22   1   92.27   25.84
  12  22   1   32.06   20.37
  13  22   1   50.42   23.91
  14  22   1   11.91   20.82
  15  22   1    2.61   23.45
 -16  23   1  -29.67   25.94
 -15  23   1   15.23   24.93
 -14  23   1  -13.95   18.86
 -13  23   1  -12.14   16.05
 -12  23   1   45.87   20.75
 -11  23   1   47.12   19.45
 -10  23   1   16.20   15.18
  -9  23   1   -2.53   13.31
  -8  23   1    1.98   14.49
  -7  23   1   -8.50   11.89
  -6  23   1    2.56   11.62
  -5  23   1   47.64   13.40
  -4  23   1    9.43   10.64
  -3  23   1  310.86   20.46
  -2  23   1  152.89   19.04
  -2  23   1  146.32   17.07
  -1  23   1  171.24   15.23
  -1  23   1  147.43   14.53
   0  23   1  132.75   14.36
   0  23   1  158.28   17.25
   1  23   1  655.40   29.84
   1  23   1  665.32   26.31
   2  23   1  120.44   17.78
   2  23   1  121.08   13.17
   3  23   1 1063.83   41.57
   3  23   1 1145.25   34.82
   4  23   1  129.44   12.88
   4  23   1  171.31   21.79
   5  23   1  162.99   22.66
   6  23   1  105.04   20.08
   7  23   1   48.63   16.18
   8  23   1  336.69   29.21
   9  23   1   27.69   18.29
  10  23   1    3.25   18.29
  11  23   1   62.62   24.44
  12  23   1   19.64   20.95
  13  23   1   43.32   23.79
  14  23   1  -18.28   18.35
  15  23   1   29.12   26.33
 -15  24   1  -38.10   21.96
 -14  24   1   -7.82   16.80
 -13  24   1   98.88   24.13
 -12  24   1   -6.06   16.07
 -11  24   1   36.54   18.20
 -10  24   1   68.97   19.97
  -9  24   1   61.76   18.90
  -8  24   1  -12.38   13.86
  -7  24   1  202.21   24.81
  -6  24   1    0.03   12.21
  -5  24   1  160.18   20.47
  -4  24   1  204.93   18.01
  -3  24   1  106.04   17.36
  -3  24   1   67.90   14.83
  -2  24   1  171.61   16.26
  -2  24   1  171.25   17.24
  -1  24   1  162.82   15.43
  -1  24   1  166.07   15.59
   0  24   1  213.90   16.18
   0  24   1  200.66   17.11
   1  24   1   73.03   14.77
   1  24   1   50.02   11.32
   2  24   1  105.99   15.13
   2  24   1  125.76   18.49
   3  24   1   15.56   10.71
   3  24   1   22.55    9.64
   4  24   1   15.75    9.55
   4  24   1   10.35   11.48
   5  24   1  142.28   21.61
   6  24   1   50.26   16.82
   7  24   1  524.39   34.23
   8  24   1  111.39   23.04
   9  24   1  268.72   33.95
  10  24   1    9.97   18.61
  11  24   1  182.69   31.80
  12  24   1   -6.76   19.18
  13  24   1   23.18   22.35
  14  24   1  -37.05   20.15
  15  24   1  -19.56   23.68
 -15  25   1   22.42   24.41
 -14  25   1  -11.43   17.26
 -13  25   1   15.78   18.54
 -12  25   1  165.87   27.94
 -11  25   1  -27.52   14.28
 -10  25   1   18.09   15.90
  -9  25   1   80.16   20.46
  -8  25   1  -28.85   11.93
  -7  25   1   11.84   14.20
  -6  25   1  291.02   23.00
  -5  25   1   -8.60   10.58
  -4  25   1   15.95   11.38
  -3  25   1   42.42   13.66
  -3  25   1   22.72   11.62
  -2  25   1  263.25   20.83
  -2  25   1  245.70   18.99
  -1  25   1  211.08   18.21
  -1  25   1  218.71   17.64
   0  25   1   55.29   12.69
   0  25   1   73.05   14.84
   1  25   1  716.81   32.56
   1  25   1  710.64   28.41
   2  25   1   31.57   10.66
   3  25   1  161.65   18.41
   3  25   1  161.51   14.72
   4  25   1   37.17   14.48
   5  25   1  335.05   26.26
   6  25   1  181.49   25.91
   7  25   1   68.05   20.13
   8  25   1  108.42   23.76
   9  25   1  118.78   26.68
  10  25   1   36.80   19.60
  11  25   1   22.65   19.39
  12  25   1   60.20   25.70
  13  25   1   41.27   25.23
  14  25   1   -7.73   22.66
 -15  26   1   -3.03   18.69
 -14  26   1   17.65   21.24
 -13  26   1    9.13   18.41
 -12  26   1    7.46   16.73
 -11  26   1   17.16   19.27
 -10  26   1   53.08   19.16
  -9  26   1   61.30   19.43
  -8  26   1   78.77   19.64
  -7  26   1   69.73   19.10
  -6  26   1   10.35   14.12
  -5  26   1  -12.35   11.19
  -4  26   1    4.87   11.85
  -3  26   1    5.25   10.19
  -3  26   1   -1.56   10.57
  -2  26   1  426.20   24.75
  -2  26   1  425.24   25.81
  -1  26   1    0.04    9.35
  -1  26   1    6.62    9.67
   0  26   1   30.54   12.51
   0  26   1   19.44   10.71
   1  26   1   42.02   14.14
   1  26   1   39.11   11.85
   2  26   1 1079.51   42.81
   2  26   1 1116.26   36.38
   3  26   1  153.07   14.62
   3  26   1  129.15   20.70
   4  26   1  165.28   22.95
   5  26   1   33.72   14.81
   6  26   1   34.49   16.83
   7  26   1  -11.73   13.63
   8  26   1   14.91   16.35
   9  26   1   29.76   20.13
  10  26   1  109.49   27.06
  11  26   1  -24.84   16.97
  12  26   1   21.69   20.55
  13  26   1   18.82   24.11
  14  26   1   41.07   27.95
 -15  27   1   44.39   26.36
 -14  27   1   12.24   22.05
 -13  27   1   18.56   20.86
 -12  27   1   90.72   23.44
 -11  27   1   -4.14   18.00
 -10  27   1   76.25   22.00
  -9  27   1  -13.75   13.39
  -8  27   1  237.99   23.24
  -7  27   1   12.78   15.77
  -6  27   1  297.45   24.37
  -5  27   1  102.26   20.48
  -4  27   1   78.17   16.96
  -3  27   1   18.41   13.04
  -3  27   1   36.63   13.21
  -2  27   1  183.98   20.83
  -2  27   1  178.41   21.96
  -1  27   1    3.69    9.64
  -1  27   1   -3.25   10.02
   0  27   1   71.11   15.50
   0  27   1   48.44   13.29
   1  27   1   57.08   15.08
   1  27   1   51.44   13.02
   2  27   1  155.32   15.20
   2  27   1  104.32   18.19
   3  27   1   73.81   17.67
   4  27   1  263.48   23.76
   5  27   1   -0.28   12.63
   6  27   1  122.50   23.33
   7  27   1   -5.69   15.58
   8  27   1  333.65   30.98
   9  27   1   11.29   19.22
  10  27   1  196.63   32.96
  11  27   1   -5.32   20.22
  12  27   1   40.72   24.74
  13  27   1    1.19   21.19
  14  27   1   47.90   26.93
 -14  28   1   78.29   26.62
 -13  28   1   61.16   24.00
 -12  28   1   69.07   23.44
 -11  28   1  -15.66   16.67
 -10  28   1   -1.74   16.84
  -9  28   1   36.63   18.49
  -8  28   1  110.20   22.23
  -7  28   1   26.13   16.40
  -6  28   1   71.64   18.72
  -5  28   1   96.26   20.16
  -4  28   1  136.88   21.56
  -4  28   1  140.72   21.26
  -3  28   1   40.27   15.42
  -3  28   1   74.44   16.63
  -2  28   1   53.22   15.06
  -2  28   1   78.74   16.90
  -1  28   1   83.95   17.16
  -1  28   1   98.52   16.76
   0  28   1  294.92   22.39
   0  28   1  275.67   19.59
   1  28   1   50.61   15.54
   1  28   1    9.67   10.25
   2  28   1  187.12   23.20
   2  28   1  141.44   15.42
   3  28   1   28.93   14.72
   4  28   1   19.95   14.77
   5  28   1   48.30   17.87
   6  28   1  132.59   24.78
   7  28   1  142.20   27.34
   8  28   1  127.84   26.55
   9  28   1  278.82   35.88
  10  28   1   37.38   21.51
  11  28   1   89.72   26.42
  12  28   1   12.65   22.72
  13  28   1   47.79   26.45
  14  28   1   92.81   31.12
 -14  29   1   -1.23   19.11
 -13  29   1   35.56   21.23
 -12  29   1    7.44   19.10
 -11  29   1   -4.50   17.79
 -10  29   1   81.11   22.99
  -9  29   1   12.60   16.42
  -8  29   1  223.38   28.10
  -7  29   1   25.66   15.47
  -6  29   1   -4.25   14.00
  -5  29   1   65.56   17.99
  -4  29   1   43.22   15.92
  -4  29   1   31.40   15.88
  -3  29   1   46.96   15.79
  -3  29   1   63.45   16.96
  -2  29   1   78.97   17.63
  -2  29   1   82.21   17.39
  -1  29   1   37.34   13.76
  -1  29   1   62.43   16.02
   0  29   1   34.70   14.25
   0  29   1   34.12   12.41
   1  29   1  416.52   23.73
   1  29   1  456.58   28.44
   2  29   1   27.51   14.69
   3  29   1  194.37   25.54
   4  29   1  191.86   26.46
   5  29   1  445.11   31.99
   6  29   1    5.65   15.59
   7  29   1   -2.26   14.93
   8  29   1   -6.86   17.27
   9  29   1   -1.71   19.09
  10  29   1   -0.81   19.52
  11  29   1   16.77   23.22
  12  29   1  -26.90   19.71
  13  29   1  102.65   31.14
 -14  30   1  -23.42   20.60
 -13  30   1   -0.44   17.55
 -12  30   1   47.83   23.38
 -11  30   1  134.01   26.69
 -10  30   1    6.17   16.74
  -9  30   1  262.11   26.83
  -8  30   1   23.75   17.66
  -7  30   1  150.55   24.03
  -6  30   1   34.10   17.02
  -5  30   1  168.27   26.51
  -5  30   1  197.13   21.32
  -4  30   1   39.99   16.90
  -4  30   1   42.07   15.68
  -3  30   1  -14.07   12.26
  -3  30   1    0.19   12.83
  -2  30   1    4.41   11.21
  -2  30   1    2.96   12.15
  -1  30   1   18.77   12.38
  -1  30   1   54.41   16.34
   0  30   1   23.16   14.01
   0  30   1    6.70   11.83
   1  30   1   32.09   13.17
   1  30   1   23.17   14.03
   2  30   1   -8.20   12.33
   3  30   1   78.64   21.06
   4  30   1  186.51   26.58
   5  30   1  154.53   25.55
   6  30   1    8.65   15.15
   7  30   1  148.45   27.91
   8  30   1    0.31   19.23
   9  30   1  144.96   29.91
  10  30   1   13.41   20.33
  11  30   1   44.03   24.44
  12  30   1    6.75   21.70
  13  30   1  116.08   33.75
 -13  31   1  119.26   30.62
 -12  31   1    1.12   17.30
 -11  31   1   25.74   18.56
 -10  31   1   77.64   23.14
  -9  31   1   13.25   17.71
  -8  31   1   45.47   19.15
  -7  31   1  170.22   25.62
  -6  31   1   53.03   18.39
  -5  31   1  189.90   21.23
  -5  31   1  192.84   28.00
  -4  31   1  115.23   20.95
  -4  31   1   86.88   20.85
  -3  31   1  137.58   22.26
  -3  31   1  159.60   24.34
  -2  31   1   -5.60   10.92
  -2  31   1   -0.79   12.08
  -1  31   1  117.27   19.45
  -1  31   1   87.88   19.03
   0  31   1   38.87   16.11
   0  31   1   23.99   13.92
   1  31   1   78.10   18.72
   2  31   1  -25.03   11.58
   3  31   1   48.73   17.64
   4  31   1   10.50   15.75
   5  31   1    9.69   15.19
   6  31   1   47.45   20.48
   7  31   1   26.32   19.94
   8  31   1  110.21   27.84
   9  31   1   38.55   22.08
  10  31   1   98.07   26.90
  11  31   1    3.63   23.34
  12  31   1   15.56   24.95
  13  31   1  -16.55   21.42
 -13  32   1  -51.14   19.27
 -12  32   1   59.93   23.03
 -11  32   1  157.81   29.37
 -10  32   1   11.30   18.75
  -9  32   1    9.71   18.14
  -8  32   1   19.82   18.38
  -7  32   1    1.95   15.58
  -6  32   1  103.74   22.35
  -6  32   1  128.00   26.16
  -5  32   1   35.85   17.32
  -5  32   1   30.87   18.69
  -4  32   1  239.64   22.94
  -4  32   1  214.99   23.59
  -3  32   1   45.67   16.83
  -3  32   1   39.02   17.07
  -2  32   1    3.71   12.87
  -2  32   1   -9.52   12.76
  -1  32   1   35.01   15.06
  -1  32   1   44.06   16.59
   0  32   1  212.22   20.23
   0  32   1  220.28   22.46
   1  32   1  197.95   25.92
   2  32   1    7.53   15.11
   3  32   1    3.72   14.80
   4  32   1   27.64   18.22
   5  32   1   -1.28   13.80
   6  32   1  173.97   29.47
   7  32   1   46.26   22.33
   8  32   1    8.13   19.46
   9  32   1    1.09   19.71
  10  32   1   29.12   24.00
  11  32   1   21.79   23.22
  12  32   1   34.07   24.47
 -12  33   1  150.87   31.35
 -11  33   1    7.58   19.69
 -10  33   1  123.45   26.47
  -9  33   1   -7.73   15.70
  -8  33   1  318.06   28.96
  -7  33   1    9.67   16.48
  -6  33   1   53.07   19.10
  -6  33   1   64.38   22.48
  -5  33   1    0.96   15.12
  -5  33   1   11.52   15.71
  -4  33   1  132.46   24.95
  -4  33   1  150.44   23.49
  -3  33   1   92.39   21.19
  -3  33   1  123.32   22.29
  -2  33   1  -19.81   11.64
  -2  33   1   -9.81   12.93
  -1  33   1   -2.07   14.66
  -1  33   1    5.56   12.99
   0  33   1   28.40   15.81
   1  33   1   18.76   15.41
   2  33   1   19.83   15.43
   3  33   1   -0.87   15.53
   4  33   1  155.28   26.51
   5  33   1  100.30   23.55
   6  33   1   28.86   20.89
   7  33   1  -12.43   19.32
   8  33   1   78.29   25.13
   9  33   1  -13.67   19.64
  10  33   1  105.62   30.44
  11  33   1   13.34   21.30
  12  33   1   19.38   24.87
 -12  34   1   92.53   27.49
 -11  34   1   14.85   18.95
 -10  34   1   -4.83   17.75
  -9  34   1  177.88   29.12
  -8  34   1   44.55   20.37
  -7  34   1   87.57   26.02
  -7  34   1   91.38   23.45
  -6  34   1   24.60   19.00
  -6  34   1   27.81   18.14
  -5  34   1   95.13   21.87
  -5  34   1   58.25   22.31
  -4  34   1  291.11   26.03
  -4  34   1  292.24   28.15
  -3  34   1   62.28   19.17
  -3  34   1   22.40   16.76
  -2  34   1  180.54   25.84
  -2  34   1  196.96   21.99
  -1  34   1   13.67   14.71
  -1  34   1    4.01   14.03
   0  34   1   45.48   18.67
   1  34   1   -3.03   15.12
   2  34   1  135.53   24.09
   3  34   1   -7.06   13.75
   4  34   1   14.53   18.23
   5  34   1   -0.56   16.85
   6  34   1    1.26   18.17
   7  34   1    4.75   18.41
   8  34   1   -5.31   20.69
   9  34   1   49.90   27.78
  10  34   1  -13.42   20.37
  11  34   1   22.28   24.98
 -12  35   1   92.85   25.48
 -11  35   1   50.94   24.57
 -10  35   1  -12.76   17.67
  -9  35   1   21.45   18.81
  -8  35   1  -18.84   17.02
  -8  35   1    9.90   17.84
  -7  35   1   60.71   20.79
  -7  35   1   55.97   22.84
  -6  35   1  -13.80   15.79
  -6  35   1  -11.66   14.67
  -5  35   1   22.10   17.23
  -5  35   1    2.98   14.96
  -4  35   1   42.59   18.97
  -4  35   1   50.59   20.60
  -3  35   1  386.17   29.00
  -3  35   1  321.00   27.90
  -2  35   1   33.50   17.24
  -2  35   1   51.99   19.08
  -1  35   1  123.97   23.59
   0  35   1   41.57   18.62
   1  35   1   28.08   18.40
   2  35   1   23.14   18.19
   3  35   1  153.45   27.89
   4  35   1   80.63   24.13
   5  35   1  -13.19   15.30
   6  35   1   10.84   20.65
   7  35   1  142.25   30.24
   8  35   1  -17.84   18.20
   9  35   1  -30.81   18.42
  10  35   1   -9.67   22.31
  11  35   1   32.01   26.65
 -11  36   1  141.12   30.10
 -10  36   1   -0.64   20.01
  -9  36   1   23.84   20.84
  -8  36   1   -4.93   18.13
  -8  36   1  -11.06   17.13
  -7  36   1   88.57   25.36
  -7  36   1  125.86   26.03
  -6  36   1   -6.50   16.40
  -6  36   1  -21.69   13.74
  -5  36   1  206.70   29.57
  -5  36   1  188.79   30.76
  -4  36   1   28.14   16.52
  -4  36   1   18.94   16.73
  -3  36   1   44.15   19.48
  -3  36   1   41.77   19.36
  -2  36   1    6.68   15.42
  -2  36   1   10.08   15.38
  -1  36   1  225.11   29.49
   0  36   1    1.76   17.66
   1  36   1  110.94   24.75
   2  36   1  -10.41   16.88
   3  36   1   38.80   20.77
   4  36   1    5.41   18.85
   5  36   1  100.41   27.41
   6  36   1    7.09   20.59
   7  36   1  263.77   37.30
   8  36   1   -5.99   20.28
   9  36   1  -20.59   19.19
  10  36   1   -3.20   24.85
  11  36   1   82.49   29.33
 -10  37   1  -15.22   18.98
  -9  37   1  -15.46   17.88
  -9  37   1   -8.94   20.15
  -8  37   1   34.09   20.30
  -8  37   1   42.61   24.47
  -7  37   1   31.34   18.99
  -7  37   1   32.44   21.86
  -6  37   1   18.30   19.18
  -6  37   1   20.77   19.91
  -5  37   1    2.63   17.34
  -5  37   1   17.42   17.66
  -4  37   1   27.95   19.04
  -4  37   1   82.57   22.74
  -3  37   1  185.97   28.82
  -3  37   1  161.76   26.64
  -2  37   1   41.70   19.08
  -1  37   1   95.30   23.86
   0  37   1   -8.38   16.33
   1  37   1   85.86   24.76
   2  37   1   -2.34   18.31
   3  37   1  170.90   29.14
   4  37   1   38.22   21.20
   5  37   1   -2.46   19.34
   6  37   1  104.26   28.57
   7  37   1   14.54   21.41
   8  37   1   51.88   26.18
   9  37   1  -20.53   21.70
  10  37   1  -13.49   24.57
 -10  38   1    4.28   21.27
 -10  38   1  -23.77   20.10
  -9  38   1  -17.46   18.44
  -9  38   1   -2.64   18.27
  -8  38   1  -10.18   18.20
  -8  38   1    1.34   19.52
  -7  38   1    0.16   15.98
  -7  38   1   17.63   18.09
  -6  38   1    6.97   18.17
  -6  38   1    8.23   18.52
  -5  38   1   -1.73   16.85
  -5  38   1  -18.85   16.10
  -4  38   1   63.48   22.10
  -4  38   1   95.71   23.39
  -3  38   1    4.49   16.90
  -3  38   1   12.67   18.08
  -2  38   1  173.61   28.91
  -1  38   1   19.22   17.91
   0  38   1  118.54   26.22
   1  38   1   24.33   19.82
   2  38   1  224.74   34.22
   3  38   1   69.19   23.60
   4  38   1   61.52   23.73
   5  38   1   -7.93   20.44
   6  38   1   63.71   24.94
   7  38   1   14.37   22.30
   8  38   1    3.96   22.36
   9  38   1  -54.39   20.45
  10  38   1    6.55   25.73
  -9  39   1  -35.36   17.78
  -9  39   1   -4.50   19.84
  -8  39   1   92.16   24.88
  -8  39   1   42.76   23.97
  -7  39   1   -8.84   18.09
  -7  39   1   16.51   19.91
  -6  39   1   41.50   20.79
  -6  39   1   51.76   23.28
  -5  39   1    7.67   19.14
  -5  39   1   17.22   19.70
  -4  39   1   74.09   23.00
  -4  39   1   82.82   23.71
  -3  39   1   34.13   19.75
  -2  39   1   51.64   22.39
  -1  39   1  -21.47   17.03
   0  39   1   10.73   18.13
   1  39   1   18.89   19.10
   2  39   1   36.56   21.83
   3  39   1   25.03   22.26
   4  39   1  135.18   29.95
   5  39   1    7.47   18.93
   6  39   1   75.51   25.10
   7  39   1   12.47   21.77
   8  39   1   47.44   26.43
   9  39   1   -4.88   24.12
  -9  40   1    5.23   23.31
  -9  40   1  -23.02   19.08
  -8  40   1   -6.35   18.24
  -8  40   1    8.66   20.12
  -7  40   1   35.44   22.31
  -7  40   1   33.72   23.16
  -6  40   1   40.49   22.09
  -6  40   1  -16.65   17.93
  -5  40   1    0.37   19.71
  -5  40   1   49.29   20.89
  -4  40   1   60.74   21.82
  -4  40   1   69.43   23.51
  -3  40   1   31.01   20.17
  -2  40   1   23.68   21.10
  -1  40   1   73.23   25.51
   0  40   1  121.05   29.54
   1  40   1   15.80   18.57
   2  40   1   45.73   24.16
   3  40   1   36.44   23.70
   4  40   1   15.17   19.02
   5  40   1   60.70   24.84
   6  40   1   37.05   25.38
   7  40   1  120.27   33.20
   8  40   1   19.74   24.23
  -8  41   1   32.47   23.14
  -8  41   1   28.04   22.11
  -7  41   1    1.85   20.82
  -7  41   1   25.04   22.04
  -6  41   1   10.04   19.66
  -6  41   1   -8.62   20.54
  -5  41   1   -4.04   19.45
  -5  41   1   20.26   20.44
  -4  41   1    3.09   16.85
  -3  41   1   81.85   24.32
  -2  41   1   37.82   22.80
  -1  41   1   98.10   26.77
   0  41   1    1.11   20.97
   1  41   1  126.20   28.41
   2  41   1   -3.67   19.15
   3  41   1  119.02   28.67
   4  41   1   -9.72   20.52
   5  41   1   19.38   21.89
   6  41   1  -13.62   20.36
   7  41   1    5.19   22.69
  -7  42   1   51.29   23.59
  -7  42   1   49.94   25.17
  -6  42   1   11.55   20.62
  -6  42   1    1.07   20.17
  -5  42   1   77.34   24.78
  -4  42   1    1.60   18.44
  -3  42   1    4.96   18.24
  -2  42   1    1.53   19.85
  -1  42   1   -3.49   19.35
   0  42   1   18.15   22.40
   1  42   1   34.91   21.66
   2  42   1    3.36   22.43
   3  42   1    0.50   21.33
   4  42   1    0.89   18.88
   5  42   1   39.28   24.10
   6  42   1   14.99   24.87
   7  42   1   17.76   26.15
  -6  43   1   25.41   22.85
  -5  43   1   47.55   24.48
  -4  43   1   58.01   24.71
  -3  43   1   36.49   22.80
  -2  43   1    2.32   21.67
  -1  43   1   74.94   25.82
   0  43   1   18.85   21.81
   1  43   1    1.21   19.27
   2  43   1  -17.75   19.26
   3  43   1   -1.85   20.69
   4  43   1   64.25   26.65
   5  43   1  -11.39   23.62
   6  43   1   10.01   24.40
  -5  44   1    5.51   20.91
  -4  44   1  110.01   29.33
  -3  44   1    2.01   22.33
  -2  44   1   67.70   25.81
  -1  44   1   24.32   22.09
   0  44   1   98.61   26.68
   1  44   1   -1.88   21.28
   2  44   1   14.69   22.26
   3  44   1    7.70   23.55
   4  44   1   17.17   24.23
  -3  45   1   -9.00   21.47
  -2  45   1   -4.16   21.64
  -1  45   1  -10.32   19.38
   0  45   1   16.01   21.40
   1  45   1   -6.32   20.10
   2  45   1   16.13   22.28
   3  45   1   21.23   24.03
   3  45  -2   46.98   28.99
   2  45  -2    1.68   22.41
   1  45  -2  115.34   29.51
   0  45  -2   12.29   23.09
  -1  45  -2   33.13   23.75
  -2  45  -2  -15.76   19.04
   5  44  -2   67.24   27.01
   4  44  -2  -10.78   21.00
   3  44  -2   -9.29   22.34
   2  44  -2    5.50   21.34
   1  44  -2   32.27   23.27
   0  44  -2   18.70   23.17
  -1  44  -2  -19.49   19.35
  -2  44  -2   -3.50   18.85
  -3  44  -2   16.84   22.39
  -4  44  -2  -32.75   20.34
   6  43  -2   -6.70   22.14
   5  43  -2    3.15   22.73
   4  43  -2   42.97   25.47
   3  43  -2   36.88   23.61
   2  43  -2   -5.00   18.69
   1  43  -2   65.47   25.91
   0  43  -2   12.62   20.79
  -1  43  -2  -10.74   19.62
  -2  43  -2  -15.03   18.12
  -3  43  -2   -1.26   20.19
  -4  43  -2   10.29   22.44
  -5  43  -2   21.47   23.74
   7  42  -2  -10.60   23.96
   6  42  -2    2.70   21.50
   5  42  -2   -0.22   23.17
   4  42  -2   88.91   27.83
   3  42  -2   -0.48   20.13
   2  42  -2   31.78   22.76
   1  42  -2   49.02   23.15
   0  42  -2  176.04   33.35
  -1  42  -2   -4.53   19.08
  -2  42  -2  -12.75   17.50
  -3  42  -2   -5.56   19.59
  -4  42  -2    2.04   20.03
  -5  42  -2    8.96   20.91
  -6  42  -2    5.02   22.71
   8  41  -2   57.18   29.03
   7  41  -2  -20.52   21.66
   6  41  -2   21.05   23.39
   5  41  -2   11.42   21.48
   4  41  -2   13.41   23.11
   3  41  -2   -3.85   20.51
   2  41  -2    8.57   18.69
   1  41  -2   12.65   21.18
   0  41  -2    4.31   18.25
  -1  41  -2   30.02   21.49
  -2  41  -2   24.93   18.80
  -3  41  -2    7.45   20.37
  -4  41  -2   41.24   21.71
  -5  41  -2  -13.29   18.90
  -6  41  -2   70.26   24.86
  -7  41  -2    3.56   23.46
  -7  41  -2   19.22   21.60
   9  40  -2   13.93   24.91
   8  40  -2   -9.14   20.79
   7  40  -2    4.65   22.57
   6  40  -2  -19.26   18.99
   5  40  -2   -2.86   20.69
   4  40  -2    0.91   20.04
   3  40  -2   -3.04   19.25
   2  40  -2    6.02   19.41
   1  40  -2  -10.11   17.27
   0  40  -2   69.27   24.43
  -1  40  -2  -22.27   17.72
  -2  40  -2  182.62   29.74
  -3  40  -2   21.85   18.88
  -4  40  -2   27.80   19.38
  -5  40  -2   21.82   19.40
  -6  40  -2  103.51   26.41
  -6  40  -2   81.58   23.86
  -7  40  -2   35.88   22.18
  -7  40  -2   20.94   21.15
  -8  40  -2    0.66   21.43
   9  39  -2    3.30   23.18
   8  39  -2  -31.06   22.91
   7  39  -2   19.03   25.04
   6  39  -2  -27.58   19.92
   5  39  -2   -9.53   17.54
   4  39  -2   -3.38   18.55
   3  39  -2   71.96   24.88
   2  39  -2   85.61   26.58
   1  39  -2   43.66   22.78
   0  39  -2   -6.17   18.99
  -1  39  -2   52.08   22.07
  -2  39  -2   -2.08   17.84
  -3  39  -2  147.49   27.74
  -4  39  -2    3.81   18.60
  -5  39  -2   12.99   17.60
  -5  39  -2   29.68   22.31
  -6  39  -2   31.90   21.09
  -6  39  -2   71.26   25.52
  -7  39  -2   52.46   22.86
  -8  39  -2  -11.80   21.52
  -9  39  -2   -3.93   20.86
  10  38  -2    0.52   24.92
   9  38  -2   32.25   25.20
   8  38  -2   -8.09   19.66
   7  38  -2   43.61   24.51
   6  38  -2  -16.58   18.66
   5  38  -2   57.35   24.66
   4  38  -2  -17.15   18.49
   3  38  -2   10.10   17.06
   2  38  -2   32.19   20.21
   1  38  -2  160.56   28.61
   0  38  -2  -20.35   16.36
  -1  38  -2    5.20   18.25
  -2  38  -2   -5.39   16.92
  -3  38  -2   34.15   20.64
  -4  38  -2    1.46   18.44
  -5  38  -2   43.67   20.04
  -5  38  -2   70.26   23.55
  -6  38  -2    3.87   17.56
  -7  38  -2  308.03   32.05
  -8  38  -2  -26.94   17.91
  -9  38  -2   26.47   25.45
  10  37  -2  -35.31   20.96
   9  37  -2   -7.69   20.31
   8  37  -2   14.48   21.93
   7  37  -2   21.52   22.32
   6  37  -2  -20.88   18.72
   5  37  -2    1.34   18.71
   4  37  -2   19.02   18.04
   3  37  -2   76.24   24.01
   2  37  -2   59.98   22.92
   1  37  -2   69.85   24.75
   0  37  -2  -30.91   14.89
  -1  37  -2   23.11   19.29
  -2  37  -2   27.28   18.68
  -3  37  -2  104.82   24.47
  -4  37  -2   35.95   20.59
  -4  37  -2   48.34   19.66
  -5  37  -2    3.25   17.63
  -6  37  -2  100.77   25.32
  -7  37  -2   32.65   21.46
  -8  37  -2   -0.83   20.45
  -9  37  -2  -20.97   18.89
 -10  37  -2   62.99   26.00
  11  36  -2   -1.54   24.41
  10  36  -2  -30.94   19.76
   9  36  -2   15.13   22.89
   8  36  -2   25.54   23.12
   7  36  -2   21.97   23.23
   6  36  -2  -18.53   17.19
   5  36  -2   26.55   23.19
   4  36  -2  184.18   31.05
   3  36  -2   30.21   18.74
   2  36  -2   40.84   20.32
   1  36  -2    1.27   17.49
   0  36  -2   76.78   21.23
  -1  36  -2  -36.70   13.69
  -2  36  -2  246.73   31.07
  -3  36  -2   15.59   17.05
  -3  36  -2   32.97   19.59
  -4  36  -2   34.06   21.24
  -4  36  -2   33.11   18.98
  -5  36  -2  -39.81   14.23
  -6  36  -2   70.96   24.41
  -7  36  -2   14.86   21.23
  -8  36  -2   -8.58   18.34
  -9  36  -2   -6.47   19.57
 -10  36  -2   -0.94   22.52
  11  35  -2  -16.93   21.56
  10  35  -2   -0.22   21.88
   9  35  -2   -4.66   19.99
   8  35  -2  205.08   35.31
   7  35  -2   39.92   23.01
   6  35  -2   97.59   26.34
   5  35  -2    4.36   18.06
   4  35  -2  158.00   28.56
   3  35  -2   28.45   19.01
   2  35  -2  112.75   24.59
   1  35  -2   36.52   18.75
   0  35  -2   24.28   16.51
  -1  35  -2   -1.63   16.41
  -2  35  -2   13.32   17.01
  -3  35  -2   94.05   23.25
  -3  35  -2   97.14   21.79
  -4  35  -2   70.70   22.63
  -5  35  -2  -23.78   15.27
  -6  35  -2  197.86   31.07
  -7  35  -2    3.12   18.90
  -8  35  -2   65.89   24.31
  -9  35  -2  -22.26   17.69
 -10  35  -2   53.21   24.54
 -11  35  -2   14.85   24.28
  12  34  -2   39.91   26.86
  11  34  -2   88.94   33.33
  10  34  -2   21.26   21.93
   9  34  -2   35.27   26.57
   8  34  -2   33.53   22.52
   7  34  -2   89.42   27.05
   6  34  -2   35.32   19.74
   5  34  -2   52.33   23.22
   4  34  -2  126.35   26.00
   3  34  -2  -14.40   14.30
   2  34  -2   55.79   20.75
   1  34  -2   87.58   21.56
   0  34  -2  303.04   27.17
  -1  34  -2   80.33   21.60
  -2  34  -2   29.87   16.55
  -2  34  -2   27.73   17.29
  -3  34  -2  -15.22   12.55
  -3  34  -2   -9.46   14.09
  -4  34  -2    7.52   17.40
  -5  34  -2  -23.58   15.24
  -6  34  -2    0.77   19.02
  -7  34  -2  221.82   32.59
  -8  34  -2   -1.98   17.66
  -9  34  -2  -29.42   18.54
 -10  34  -2  -26.41   18.41
 -11  34  -2   52.51   26.71
  12  33  -2   51.82   26.66
  11  33  -2    3.72   24.39
  10  33  -2   -0.42   21.88
   9  33  -2   37.29   23.66
   8  33  -2   10.63   19.47
   7  33  -2   86.32   25.79
   6  33  -2   68.31   21.75
   5  33  -2  169.43   29.47
   4  33  -2  131.48   26.11
   3  33  -2  108.36   24.41
   2  33  -2   -7.79   13.60
   1  33  -2  204.38   23.27
   0  33  -2  109.45   22.44
  -1  33  -2   66.31   19.95
  -2  33  -2    9.31   16.65
  -2  33  -2    9.27   13.66
  -3  33  -2   39.97   17.20
  -4  33  -2   22.13   16.56
  -5  33  -2  -13.93   16.28
  -6  33  -2  -17.63   16.30
  -7  33  -2   16.38   18.78
  -8  33  -2   15.04   20.47
  -9  33  -2   18.87   19.03
 -10  33  -2   16.20   19.42
 -11  33  -2   -7.24   18.62
 -12  33  -2  -49.25   20.36
  13  32  -2  -15.43   23.11
  12  32  -2   46.72   28.74
  11  32  -2   47.57   27.18
  10  32  -2    0.05   21.66
   9  32  -2  242.60   37.47
   8  32  -2   46.38   21.18
   7  32  -2  192.50   32.26
   6  32  -2   21.65   18.11
   5  32  -2  356.64   31.39
   4  32  -2  235.09   26.13
   3  32  -2   13.64   16.79
   2  32  -2  -14.09   15.10
   1  32  -2   27.71   17.45
   0  32  -2   30.16   16.59
  -1  32  -2   24.69   13.96
  -1  32  -2   25.94   15.75
  -2  32  -2   -7.15   14.15
  -2  32  -2  -14.03   11.51
  -3  32  -2  109.93   22.38
  -4  32  -2   51.77   19.23
  -5  32  -2  210.43   29.15
  -6  32  -2  -28.08   16.01
  -7  32  -2   94.50   24.93
  -8  32  -2  -15.15   17.59
  -9  32  -2   61.22   24.70
 -10  32  -2   -8.00   19.22
 -11  32  -2   65.01   26.41
 -12  32  -2  -13.60   18.07
  13  31  -2   32.75   26.95
  12  31  -2   -0.17   23.04
  11  31  -2   34.00   24.55
  10  31  -2   38.84   24.01
   9  31  -2   55.92   24.77
   8  31  -2  205.27   33.26
   7  31  -2    3.52   18.34
   6  31  -2  124.79   25.70
   5  31  -2   44.43   18.16
   4  31  -2  119.08   22.13
   3  31  -2   -0.58   13.09
   2  31  -2  -17.75   12.37
   1  31  -2  273.94   25.02
   0  31  -2  137.22   22.82
  -1  31  -2  358.06   27.01
  -1  31  -2  335.79   23.68
  -2  31  -2  -10.02   12.24
  -2  31  -2   -0.65   12.38
  -3  31  -2   48.87   18.42
  -4  31  -2  148.26   25.01
  -5  31  -2  307.71   27.44
  -6  31  -2   46.63   19.99
  -7  31  -2   -7.44   16.67
  -8  31  -2   -0.63   16.85
  -9  31  -2   -3.33   19.59
 -10  31  -2   49.96   23.86
 -11  31  -2   -9.54   18.08
 -12  31  -2  -24.54   21.38
  14  30  -2   57.72   30.03
  13  30  -2   -0.14   25.10
  12  30  -2   41.78   25.28
  11  30  -2  -17.91   19.77
  10  30  -2   12.61   19.85
   9  30  -2    6.40   18.73
   8  30  -2   42.82   22.48
   7  30  -2  -15.39   15.12
   6  30  -2   97.72   22.56
   5  30  -2   13.74   14.93
   4  30  -2  221.76   24.33
   3  30  -2   81.89   21.12
   2  30  -2   97.33   21.60
   1  30  -2   12.99   13.53
   0  30  -2  937.63   36.41
   0  30  -2  903.55   41.30
  -1  30  -2   19.32   14.69
  -1  30  -2   16.01   13.14
  -2  30  -2  205.46   25.77
  -3  30  -2   -6.69   13.06
  -4  30  -2   97.98   21.29
  -5  30  -2  190.54   25.55
  -6  30  -2   98.38   22.74
  -7  30  -2  -20.43   14.87
  -8  30  -2   63.07   23.43
  -9  30  -2  112.53   25.76
 -10  30  -2  -13.39   16.09
 -11  30  -2   14.14   20.25
 -12  30  -2   75.90   26.89
 -13  30  -2   13.57   25.31
  14  29  -2    5.19   23.86
  13  29  -2   23.02   25.11
  12  29  -2   41.37   25.09
  11  29  -2    4.95   22.08
  10  29  -2  141.83   30.53
   9  29  -2   38.42   21.43
   8  29  -2   81.63   24.76
   7  29  -2   98.88   24.30
   6  29  -2  209.27   23.16
   5  29  -2   76.74   20.70
   4  29  -2  249.45   25.31
   3  29  -2   32.21   17.19
   2  29  -2   16.32   13.90
   1  29  -2   72.60   18.61
   0  29  -2   15.28   11.26
   0  29  -2   45.47   14.88
  -1  29  -2    2.34   10.79
  -1  29  -2    7.13   13.66
  -2  29  -2   14.25   15.18
  -3  29  -2   -8.94   11.45
  -4  29  -2  402.91   28.84
  -5  29  -2   53.03   18.43
  -6  29  -2  247.28   24.82
  -7  29  -2   17.52   17.87
  -8  29  -2  412.29   32.15
  -9  29  -2   20.03   19.90
 -10  29  -2  174.07   30.13
 -11  29  -2  -19.78   18.49
 -12  29  -2  101.67   26.30
 -13  29  -2    0.72   19.35
  14  28  -2   26.89   27.97
  13  28  -2   -6.53   20.23
  12  28  -2    9.04   20.52
  11  28  -2   80.37   27.30
  10  28  -2   30.29   20.76
   9  28  -2  206.20   32.68
   8  28  -2   -4.59   14.22
   7  28  -2   28.45   18.17
   6  28  -2    1.38   13.72
   5  28  -2  201.77   27.51
   4  28  -2   26.50   16.24
   3  28  -2    8.55   13.09
   2  28  -2  196.65   21.23
   1  28  -2   -2.76   12.11
   1  28  -2    8.56    9.24
   0  28  -2  132.39   20.87
   0  28  -2  150.44   18.88
  -1  28  -2   28.03   14.45
  -1  28  -2   21.66   11.64
  -2  28  -2  290.02   23.75
  -3  28  -2   67.70   18.58
  -4  28  -2  324.29   25.68
  -5  28  -2  138.94   22.28
  -6  28  -2   81.41   20.04
  -7  28  -2  112.84   22.88
  -8  28  -2   35.75   19.21
  -9  28  -2   68.06   23.94
 -10  28  -2  121.30   28.13
 -11  28  -2   -6.47   19.63
 -12  28  -2  114.48   28.63
 -13  28  -2   80.52   26.60
 -14  28  -2   41.84   30.19
  15  27  -2   79.31   31.28
  14  27  -2    3.34   22.15
  13  27  -2   23.28   23.92
  12  27  -2  -19.79   19.15
  11  27  -2  -21.55   18.43
  10  27  -2   -2.94   19.03
   9  27  -2   16.95   17.60
   8  27  -2  -18.28   13.58
   7  27  -2  -11.73   14.36
   6  27  -2   15.00   15.81
   5  27  -2   64.55   17.78
   4  27  -2    6.33   13.55
   3  27  -2   93.41   19.33
   2  27  -2   21.60   13.45
   1  27  -2  171.06   22.18
   1  27  -2  140.21   13.96
   0  27  -2   47.12   15.60
   0  27  -2   40.37   11.54
  -1  27  -2  731.54   35.10
  -2  27  -2   -4.01   11.70
  -3  27  -2   65.12   17.90
  -4  27  -2   -2.42   13.33
  -5  27  -2  723.59   36.90
  -6  27  -2   73.82   20.38
  -7  27  -2   21.69   16.03
  -8  27  -2   90.90   22.49
  -9  27  -2   13.09   18.11
 -10  27  -2   21.10   20.53
 -11  27  -2   62.01   21.58
 -12  27  -2   75.88   25.56
 -13  27  -2  168.99   33.49
 -14  27  -2   19.21   26.22
  15  26  -2  -22.28   24.20
  14  26  -2   59.41   27.05
  13  26  -2   36.61   23.24
  12  26  -2  -15.39   18.62
  11  26  -2   66.06   23.85
  10  26  -2   -9.67   14.57
   9  26  -2   70.55   23.39
   8  26  -2   13.79   17.27
   7  26  -2  154.65   26.02
   6  26  -2   92.88   21.21
   5  26  -2  168.73   23.91
   4  26  -2    5.53   12.77
   3  26  -2  249.23   22.51
   2  26  -2   30.94   14.67
   1  26  -2  160.19   21.42
   1  26  -2  151.26   13.83
   0  26  -2  283.65   19.23
   0  26  -2  328.45   23.30
  -1  26  -2   52.31   15.05
  -2  26  -2    1.77   10.90
  -3  26  -2  207.80   24.49
  -4  26  -2   46.29   15.55
  -5  26  -2  190.17   24.61
  -6  26  -2   29.32   16.84
  -7  26  -2  315.17   27.10
  -8  26  -2  148.09   25.67
  -9  26  -2  378.74   30.61
 -10  26  -2   40.72   19.59
 -11  26  -2  229.00   32.94
 -12  26  -2    4.15   16.88
 -13  26  -2   23.39   20.69
 -14  26  -2   14.67   20.09
  15  25  -2   15.17   26.84
  14  25  -2    5.82   23.94
  13  25  -2  -12.58   18.71
  12  25  -2   77.76   26.69
  11  25  -2  129.74   28.31
  10  25  -2  133.72   27.90
   9  25  -2  -10.04   13.46
   8  25  -2  177.85   28.18
   7  25  -2    4.33   13.12
   6  25  -2  119.87   22.31
   5  25  -2   16.10   13.35
   4  25  -2   -8.31   10.63
   3  25  -2  430.72   27.49
   2  25  -2  163.01   20.70
   2  25  -2  172.96   13.29
   1  25  -2   22.99    9.68
   1  25  -2   27.74   13.39
   0  25  -2   42.24   11.84
   0  25  -2   62.23   15.25
  -1  25  -2  512.00   28.25
  -2  25  -2   46.16   14.92
  -3  25  -2  532.79   29.42
  -4  25  -2  215.62   21.07
  -5  25  -2   34.80   16.05
  -6  25  -2  157.95   22.68
  -7  25  -2   83.94   20.69
  -8  25  -2  439.73   31.58
  -9  25  -2  102.73   22.27
 -10  25  -2  273.03   27.57
 -11  25  -2  108.97   26.77
 -12  25  -2   56.49   21.55
 -13  25  -2   55.35   22.42
 -14  25  -2  -15.64   22.86
  15  24  -2   -8.97   22.03
  14  24  -2   48.77   25.76
  13  24  -2   -7.45   20.21
  12  24  -2   44.76   22.94
  11  24  -2   -3.22   17.29
  10  24  -2  137.78   27.44
   9  24  -2   -7.79   15.55
   8  24  -2   -1.93   14.70
   7  24  -2   50.02   18.19
   6  24  -2   11.91   12.78
   5  24  -2    0.67   11.27
   4  24  -2   76.45   17.65
   3  24  -2  114.22   18.71
   2  24  -2  405.36   18.64
   2  24  -2  379.65   24.99
   1  24  -2   76.90   16.31
   1  24  -2  108.40   11.89
   0  24  -2  681.27   28.00
   0  24  -2  711.97   32.18
  -1  24  -2   56.93   14.55
  -2  24  -2 1100.57   41.47
  -3  24  -2   96.22   18.00
  -4  24  -2  820.01   36.43
  -5  24  -2   65.72   17.10
  -6  24  -2  110.91   20.18
  -7  24  -2   -5.33   14.55
  -8  24  -2   36.48   17.38
  -9  24  -2   16.93   17.31
 -10  24  -2  110.65   24.14
 -11  24  -2   11.84   20.36
 -12  24  -2  109.32   27.64
 -13  24  -2    6.12   21.92
 -14  24  -2  133.95   34.04
 -15  24  -2   -7.02   26.98
  16  23  -2    2.33   23.92
  15  23  -2  -24.24   22.35
  14  23  -2  -32.88   17.85
  13  23  -2   -2.07   18.08
  12  23  -2   59.30   24.05
  11  23  -2    3.12   17.25
  10  23  -2  246.80   32.96
   9  23  -2   26.09   18.00
   8  23  -2   73.39   20.69
   7  23  -2   -2.02   12.15
   6  23  -2  694.23   36.93
   5  23  -2    9.62   11.25
   4  23  -2  102.89   18.52
   3  23  -2   40.11    9.03
   3  23  -2   38.48   11.57
   2  23  -2  382.16   24.36
   2  23  -2  378.15   17.73
   1  23  -2  103.12   16.82
   1  23  -2  113.37   13.61
   0  23  -2   18.94   12.15
  -1  23  -2  263.99   19.98
  -2  23  -2  675.18   31.27
  -3  23  -2  168.28   17.55
  -4  23  -2    7.98   11.00
  -5  23  -2  394.99   26.19
  -6  23  -2  721.82   35.90
  -7  23  -2   18.76   15.64
  -8  23  -2  208.39   22.88
  -9  23  -2   54.49   18.86
 -10  23  -2  214.75   29.15
 -11  23  -2   54.60   22.64
 -12  23  -2  241.01   34.98
 -13  23  -2    7.07   21.91
 -14  23  -2   -1.25   18.26
 -15  23  -2   41.15   30.36
  16  22  -2    1.83   25.66
  15  22  -2    9.14   24.31
  14  22  -2   -1.37   21.46
  13  22  -2   40.40   22.22
  12  22  -2    3.59   17.07
  11  22  -2    3.54   15.97
  10  22  -2  220.79   31.97
   9  22  -2  139.38   22.61
   8  22  -2   29.92   13.94
   7  22  -2  185.64   25.98
   6  22  -2   27.53   12.70
   5  22  -2  134.14   19.96
   4  22  -2  447.84   27.42
   3  22  -2  347.75   23.52
   3  22  -2  364.47   16.55
   2  22  -2 1285.01   34.74
   2  22  -2 1289.16   44.50
   1  22  -2  378.80   23.03
   1  22  -2  371.12   18.28
   0  22  -2   50.89   13.20
  -1  22  -2  241.13   18.54
  -2  22  -2  726.02   31.97
  -3  22  -2   51.19   13.73
  -4  22  -2  139.89   19.03
  -5  22  -2  521.00   29.07
  -6  22  -2  167.25   22.59
  -7  22  -2  524.84   31.52
  -8  22  -2  155.42   23.79
  -9  22  -2  378.44   29.16
 -10  22  -2   18.35   17.41
 -11  22  -2  197.04   30.04
 -12  22  -2   46.38   23.34
 -13  22  -2    6.28   20.38
 -14  22  -2  -21.64   21.15
 -15  22  -2    8.12   20.96
  16  21  -2   25.43   27.31
  15  21  -2   49.26   27.85
  14  21  -2  -31.73   18.31
  13  21  -2   94.95   26.38
  12  21  -2    0.99   17.12
  11  21  -2  362.26   32.64
  10  21  -2   86.38   23.91
   9  21  -2   44.60   19.25
  -9 -21   2   54.26   16.06
  -8 -21   2   -3.45   10.76
   8  21  -2   13.92   13.98
   7  21  -2   31.61   14.64
  -7 -21   2   18.05   10.76
   6  21  -2   27.51   13.56
   5  21  -2  253.80   21.91
   4  21  -2   61.15   14.68
   3  21  -2 1201.28   43.19
   3  21  -2 1211.95   31.55
   2  21  -2  186.49   17.46
   2  21  -2  172.06   12.29
   1  21  -2  398.57   18.38
   1  21  -2  436.43   23.78
   0  21  -2   23.48   11.24
  -1  21  -2 1105.44   38.51
  -2  21  -2   73.87   14.00
  -3  21  -2 1197.52   41.48
  -4  21  -2    2.02    9.89
  -5  21  -2  225.28   20.20
  -6  21  -2  114.32   19.32
  -7  21  -2   12.41   14.44
  -8  21  -2   94.77   20.39
  -9  21  -2  118.25   22.34
 -10  21  -2  -18.66   14.77
 -11  21  -2   41.13   19.03
 -12  21  -2   -4.34   17.72
 -13  21  -2   99.37   23.90
 -14  21  -2   27.69   25.38
 -15  21  -2  138.26   36.62
  16  20  -2   77.40   29.28
  15  20  -2   23.43   22.55
  14  20  -2  -19.11   19.10
  13  20  -2   17.48   21.00
  12  20  -2   -1.80   17.18
  11  20  -2   49.05   20.81
  10  20  -2  195.54   29.09
   9  20  -2  619.37   38.14
  -9 -20   2  655.51   30.56
  -8 -20   2    7.83   11.39
   8  20  -2   21.97   15.33
  -7 -20   2  723.82   31.30
   7  20  -2  667.02   36.03
  -6 -20   2   50.80   13.13
   6  20  -2   77.97   16.98
   5  20  -2  285.04   21.43
   4  20  -2    8.66   10.10
   4  20  -2   -9.15    5.44
   3  20  -2  972.49   26.89
   3  20  -2  961.67   36.85
   2  20  -2  135.30   17.54
   2  20  -2   88.64    9.71
   1  20  -2  329.39   20.62
   1  20  -2  300.41   15.52
   0  20  -2   83.26   14.51
  -1  20  -2  209.83   17.23
  -2  20  -2  858.67   33.35
  -3  20  -2  132.47   17.16
  -4  20  -2  198.22   18.10
  -5  20  -2  407.26   24.88
  -6  20  -2   14.17   11.13
  -7  20  -2   -3.29   12.85
  -8  20  -2  -18.39   12.47
  -9  20  -2  366.34   28.21
 -10  20  -2  123.44   24.31
 -11  20  -2  146.62   24.98
 -12  20  -2    1.39   17.29
 -13  20  -2   79.53   26.38
 -14  20  -2   -5.10   21.65
 -15  20  -2   73.46   32.03
 -16  20  -2  119.88   39.29
  16  19  -2   15.16   22.72
  15  19  -2    0.53   20.84
  14  19  -2   -7.99   18.33
  13  19  -2   53.09   22.85
  12  19  -2  -11.84   15.94
  11  19  -2   24.98   17.95
  10  19  -2  638.20   39.89
  -9 -19   2   -1.45   10.97
   9  19  -2   19.11   15.73
   8  19  -2  190.62   25.66
  -8 -19   2  152.24   15.44
   7  19  -2    5.33   10.49
  -7 -19   2   10.54    9.27
   6  19  -2  942.01   40.36
  -6 -19   2  874.72   33.78
   5  19  -2  377.98   24.78
  -5 -19   2  403.98   22.31
   4  19  -2  197.47   11.60
   4  19  -2  236.97   19.63
   3  19  -2  431.40   16.34
   3  19  -2  440.09   24.59
   1  19  -2  358.72   16.23
   1  19  -2  320.31   19.61
  -1  19  -2  790.98   30.80
  -2  19  -2 1009.61   35.68
  -3  19  -2   95.39   15.15
  -4  19  -2   22.89   11.01
  -5  19  -2   16.35   10.72
  -6  19  -2  441.44   26.23
  -7  19  -2  -11.01   10.83
  -8  19  -2  143.55   23.05
  -9  19  -2   12.06   14.13
 -10  19  -2   99.92   22.14
 -11  19  -2    8.02   15.01
 -12  19  -2  354.11   32.08
 -13  19  -2  201.57   34.52
 -14  19  -2   -0.23   17.94
 -15  19  -2   48.46   27.36
 -16  19  -2   35.84   25.87
  17  18  -2   38.89   27.73
  16  18  -2    3.29   23.87
  15  18  -2   42.94   25.24
  14  18  -2  200.49   34.77
  13  18  -2  -20.01   16.13
  12  18  -2   25.13   19.70
  11  18  -2   21.58   16.72
  10  18  -2  311.20   28.84
   9  18  -2    0.82   13.64
  -9 -18   2   -2.01    9.92
  -8 -18   2    6.43   10.58
   8  18  -2   14.10   13.26
  -7 -18   2  135.57   14.14
   7  18  -2  151.80   21.57
   6  18  -2  202.00   18.54
  -6 -18   2  213.72   16.60
  -5 -18   2   35.48   11.17
   5  18  -2   28.59   12.22
   5  18  -2   29.97    6.19
   4  18  -2  737.56   20.92
   4  18  -2  740.73   32.29
   3  18  -2   21.57    6.50
   3  18  -2   52.22   12.58
   2  18  -2 2048.61   54.66
   2  18  -2 2055.82   43.93
   1  18  -2  355.08   16.12
   1  18  -2  375.54   20.55
   0  18  -2  980.85   33.62
  -2  18  -2 1497.87   44.05
  -3  18  -2   93.33   14.71
  -4  18  -2 1023.60   36.73
  -5  18  -2   31.11   11.76
  -6  18  -2   -2.49   10.34
  -7  18  -2  -12.63    9.94
  -8  18  -2   60.97   17.39
  -9  18  -2  144.21   21.24
 -10  18  -2   35.07   17.61
 -11  18  -2   72.87   19.75
 -12  18  -2   51.95   21.27
 -13  18  -2   48.11   24.56
 -14  18  -2   83.77   27.87
 -15  18  -2   19.22   22.99
 -16  18  -2  400.16   56.08
  17  17  -2  -10.97   22.23
  16  17  -2  -15.54   20.43
  15  17  -2    9.13   20.20
  14  17  -2   29.07   22.06
  13  17  -2   10.84   19.00
  12  17  -2  -14.51   13.57
  11  17  -2  191.05   29.31
  10  17  -2  844.52   44.25
  -9 -17   2    3.13   10.45
   9  17  -2    4.49   12.12
   8  17  -2   35.07   15.17
  -8 -17   2   24.79   12.01
   7  17  -2  124.51   19.66
  -7 -17   2  108.47   15.16
  -6 -17   2  230.36   17.30
   6  17  -2  261.08   20.18
   5  17  -2  138.11   15.75
  -5 -17   2  125.82   13.14
   5  17  -2  131.69    8.23
   4  17  -2  181.71   16.70
   4  17  -2  150.85    9.07
  -4 -17   2  158.28   14.07
   3  17  -2  560.14   17.52
   3  17  -2  586.63   27.00
   2  17  -2  104.73   14.02
   2  17  -2   70.33    7.74
   1  17  -2  105.62   13.93
   0  17  -2   77.66   12.28
  -1  17  -2  813.20   29.92
  -4  17  -2  394.91   22.60
  -5  17  -2  155.70   15.93
  -6  17  -2  329.49   22.47
  -7  17  -2   19.75   13.80
  -8  17  -2  658.31   33.32
  -9  17  -2    5.37   13.78
 -10  17  -2  145.38   23.75
 -11  17  -2   -8.64   13.31
 -12  17  -2   98.26   24.43
 -13  17  -2   52.51   24.65
 -14  17  -2   51.46   26.73
 -15  17  -2   65.73   31.35
 -16  17  -2  -19.68   31.61
  17  16  -2    4.68   22.90
  16  16  -2   17.73   23.41
  15  16  -2   -3.01   17.48
  14  16  -2  197.85   33.18
  13  16  -2   14.80   17.41
  12  16  -2  -22.51   13.43
  11  16  -2    5.20   15.51
  10  16  -2   30.44   16.05
 -10 -16   2   17.83   11.49
  -9 -16   2  518.65   25.12
   9  16  -2  459.22   30.80
   8  16  -2   -4.33    8.17
  -8 -16   2  -10.27    7.41
   7  16  -2  722.40   35.09
  -7 -16   2  705.72   28.47
   6  16  -2  139.26    8.53
   6  16  -2  185.85   18.26
  -6 -16   2  200.86   15.35
  -5 -16   2  475.74   22.62
   5  16  -2  485.22   25.95
   5  16  -2  442.63   14.08
   4  16  -2   -8.36    3.52
   4  16  -2   -1.69    8.13
  -4 -16   2   -1.34    6.45
   3  16  -2 1922.62   52.66
  -3 -16   2 1977.26   51.23
   3  16  -2 1961.40   39.71
   2  16  -2   13.74    8.42
   2  16  -2   -1.64    4.81
   1  16  -2   68.39   11.73
   0  16  -2  594.22   24.27
  -1  16  -2  141.49   13.46
  -2  16  -2   12.93    8.70
  -4  16  -2  355.38   21.02
  -5  16  -2  666.52   29.22
  -6  16  -2  192.40   17.87
  -7  16  -2    8.79   12.05
  -8  16  -2   37.73   15.19
  -9  16  -2  414.33   28.82
 -10  16  -2   32.00   15.03
 -11  16  -2  112.22   22.81
 -12  16  -2  142.48   27.27
 -13  16  -2  174.32   31.87
 -14  16  -2   91.55   30.90
 -15  16  -2   43.47   30.21
 -16  16  -2    7.38   25.30
  17  15  -2  115.05   31.41
  16  15  -2   42.01   22.65
  15  15  -2   94.77   26.78
  14  15  -2   85.83   25.87
  13  15  -2  189.27   30.79
  12  15  -2  -19.75   14.61
  11  15  -2   87.53   22.41
  10  15  -2   15.06   13.29
 -10 -15   2   29.81   11.41
   9  15  -2   26.54   14.08
  -9 -15   2   25.30   11.34
   8  15  -2   65.15   16.98
  -8 -15   2  103.18   14.60
  -7 -15   2   68.83   12.38
   7  15  -2   67.75   15.50
   6  15  -2  349.77   23.33
   6  15  -2  392.12   13.15
  -6 -15   2  410.92   20.72
   5  15  -2  534.52   26.79
  -5 -15   2  547.38   23.46
   5  15  -2  511.81   14.64
  -4 -15   2  185.59   13.97
   4  15  -2  198.02   16.48
   4  15  -2  191.21    8.81
   3  15  -2   67.78    6.54
  -3 -15   2   36.32    9.41
   2  15  -2    9.65    7.21
   1  15  -2 1133.73   34.55
  -1  15  -2 4782.84   96.04
  -2  15  -2    2.20    7.21
  -3  15  -2  136.58   13.65
  -5  15  -2 1494.75   45.88
  -6  15  -2    9.21   10.19
  -7  15  -2   30.14   12.69
  -8  15  -2   55.75   15.74
  -9  15  -2   67.64   17.98
 -10  15  -2   53.48   17.96
 -11  15  -2   55.60   19.63
 -12  15  -2  169.85   28.72
 -13  15  -2  425.59   37.23
 -14  15  -2  -13.27   21.71
 -15  15  -2   77.54   28.12
 -16  15  -2   -0.70   36.11
  17  14  -2    3.78   20.63
  16  14  -2    3.81   19.33
  15  14  -2  165.45   30.05
  14  14  -2  146.34   29.45
  13  14  -2  108.31   24.99
  12  14  -2  -23.64   13.20
  11  14  -2  239.76   25.90
 -10 -14   2  120.96   16.39
  10  14  -2  120.73   22.15
   9  14  -2  323.68   25.44
  -9 -14   2  317.81   19.44
   8  14  -2  197.82   19.93
  -8 -14   2  210.33   15.57
   7  14  -2   42.04   13.33
  -7 -14   2   54.69   10.54
   7  14  -2   57.79    8.01
  -6 -14   2  108.70   11.40
   6  14  -2  100.08    7.10
   6  14  -2   81.89   14.95
  -5 -14   2  511.15   22.22
   5  14  -2  460.95   24.41
   5  14  -2  437.70   13.15
   4  14  -2   29.19    5.11
   4  14  -2   34.52   10.71
  -4 -14   2   23.23    8.41
   3  14  -2 1044.85   34.48
  -3 -14   2 1026.46   32.37
   3  14  -2 1048.70   23.57
   2  14  -2 1032.70   23.84
  -2 -14   2 1000.15   31.75
   2  14  -2  966.60   31.67
   1  14  -2   59.32    9.96
   0  14  -2 1562.27   41.24
  -1  14  -2  555.06   22.41
  -2  14  -2  781.88   27.59
  -3  14  -2   59.57   11.44
  -4  14  -2 1793.70   48.80
  -5  14  -2 1312.54   41.72
  -6  14  -2   -1.85    9.08
  -7  14  -2  487.24   26.84
  -8  14  -2   92.89   17.29
  -9  14  -2 1241.14   47.58
 -10  14  -2   91.23   21.48
 -11  14  -2   76.25   22.00
 -12  14  -2  189.43   30.22
 -13  14  -2   -1.64   18.10
 -14  14  -2   13.56   20.34
 -15  14  -2   37.79   30.46
 -16  14  -2   89.44   43.33
  17  13  -2   86.52   28.76
  16  13  -2   23.61   22.66
  15  13  -2  133.89   29.37
  14  13  -2   65.37   21.45
  13  13  -2   35.02   19.57
  12  13  -2    4.38   15.07
  11  13  -2    7.99   15.34
  10  13  -2  312.61   25.15
 -10 -13   2  333.99   20.17
   9  13  -2   15.04   12.98
  -9 -13   2   -2.56    7.96
   8  13  -2   94.00   17.62
  -8 -13   2  103.54   11.90
   7  13  -2  239.07   19.90
   7  13  -2  219.82   11.00
  -7 -13   2  243.02   15.44
  -6 -13   2   90.65   10.28
   6  13  -2   76.75    6.32
   6  13  -2   64.62   13.76
   5  13  -2  583.32   26.43
  -5 -13   2  604.72   23.73
   5  13  -2  573.26   15.06
  -4 -13   2 2278.37   54.31
   4  13  -2 2219.09   41.54
   4  13  -2 2311.77   58.14
  -3 -13   2   63.39   10.08
   3  13  -2   55.19    5.09
   3  13  -2   58.13    9.44
   2  13  -2  520.23   14.62
   2  13  -2  520.49   21.38
  -2 -13   2  457.25   20.15
   1  13  -2  319.28   16.06
   0  13  -2 1978.76   47.68
  -1  13  -2  287.61   15.60
  -2  13  -2   28.92    8.21
  -3  13  -2  494.09   21.68
  -4  13  -2 1159.56   36.83
  -6  13  -2  532.05   26.24
  -7  13  -2   84.48   15.76
  -8  13  -2 1412.54   48.77
  -9  13  -2   37.01   15.44
 -10  13  -2  333.44   27.52
 -11  13  -2  -18.43   14.42
 -12  13  -2  164.64   29.16
 -13  13  -2   13.68   20.16
 -14  13  -2    2.34   23.49
 -15  13  -2  143.77   41.83
 -16  13  -2    3.00   28.15
 -17  13  -2   12.48   47.93
  18  12  -2   48.87   27.26
  17  12  -2   21.00   23.61
  16  12  -2   99.37   28.27
  15  12  -2   -2.18   19.23
  14  12  -2  207.03   32.24
  13  12  -2   28.98   17.45
  12  12  -2  -13.53   15.13
  11  12  -2  424.61   31.75
  10  12  -2   28.27   14.56
 -10 -12   2    7.65   10.84
   9  12  -2    4.29   10.34
  -9 -12   2   24.42    9.52
  -8 -12   2    9.39    7.64
   8  12  -2   -2.77    9.15
   7  12  -2   80.52   15.31
  -7 -12   2  106.25   12.92
   7  12  -2   78.53    7.47
   6  12  -2  210.60    9.67
  -6 -12   2  205.75   14.20
   6  12  -2  203.47   16.39
   5  12  -2   -1.41    3.15
   5  12  -2    4.96    7.51
  -5 -12   2    5.76    6.74
   4  12  -2  504.87   22.65
  -4 -12   2  498.31   20.63
  -3 -12   2   76.71   10.23
   3  12  -2   46.47    4.42
   3  12  -2   56.68    8.85
   2  12  -2 1401.30   28.97
   2  12  -2 1457.11   38.61
  -2 -12   2 1454.87   38.22
   1  12  -2  184.17   11.96
   0  12  -2  262.85   13.75
  -1  12  -2 1616.57   40.70
  -2  12  -2  549.51   21.53
  -3  12  -2   43.33    9.10
  -4  12  -2 1238.69   37.50
  -6  12  -2  296.95   19.73
  -7  12  -2    3.61    9.14
  -8  12  -2   12.38   11.96
  -9  12  -2  117.55   20.15
 -10  12  -2   96.62   20.37
 -11  12  -2  -10.80   15.30
 -12  12  -2  272.27   29.16
 -13  12  -2    6.12   20.38
 -14  12  -2  375.34   48.27
 -15  12  -2  -25.49   26.11
 -16  12  -2  445.14   67.49
 -17  12  -2  139.67   55.14
  18  11  -2   -7.16   22.16
  17  11  -2  -24.70   19.03
  16  11  -2   27.24   20.89
  15  11  -2  -17.23   16.80
  14  11  -2   67.62   22.51
  13  11  -2  134.24   25.65
  12  11  -2  351.15   28.74
  11  11  -2   12.00   15.05
  10  11  -2  158.52   23.33
 -10 -11   2  121.91   13.98
  -9 -11   2   -4.43    6.83
   9  11  -2   -0.56    9.84
   8  11  -2  342.28   23.54
  -8 -11   2  311.48   17.31
   7  11  -2   37.57   12.39
  -7 -11   2   32.56    9.40
   6  11  -2  429.53   13.85
   6  11  -2  428.30   23.38
  -6 -11   2  432.82   19.51
  -5 -11   2   35.54    8.16
   5  11  -2   10.88    7.90
   5  11  -2   37.65    5.04
  -4 -11   2  716.61   24.53
   4  11  -2  737.79   27.51
  -3 -11   2   73.85    8.39
   3  11  -2   69.18   10.37
   2  11  -2   28.83    4.10
  -2 -11   2   13.55    5.98
  -1 -11   2   24.76    6.65
   1  11  -2   47.47    7.72
   0  11  -2  149.31   10.62
  -1  11  -2  823.90   25.51
  -2  11  -2   72.73    7.92
  -3  11  -2   71.21   10.17
  -4  11  -2  415.46   20.06
  -5  11  -2 1507.02   43.59
  -6  11  -2  596.32   26.56
  -7  11  -2   37.28   12.07
  -8  11  -2  468.63   27.24
  -9  11  -2   33.81   15.56
 -10  11  -2  457.68   31.21
 -11  11  -2   20.88   17.97
 -12  11  -2  199.33   30.10
 -13  11  -2  504.82   40.95
 -14  11  -2   61.32   31.36
 -15  11  -2   47.85   30.00
 -16  11  -2   76.81   46.20
 -17  11  -2  103.59   65.47
  18  10  -2    0.32   22.65
  17  10  -2    9.04   20.11
  16  10  -2  150.64   31.49
  15  10  -2   -3.67   17.10
  14  10  -2  -12.31   13.16
  13  10  -2  184.56   27.61
  12  10  -2  208.58   29.11
  11  10  -2    8.96   13.30
  10  10  -2   26.81   13.72
 -10 -10   2    9.59   10.95
   9  10  -2  183.25   19.20
  -9 -10   2  245.72   15.97
  -8 -10   2  377.37   19.21
   8  10  -2  408.01   25.25
  -7 -10   2  383.50   18.95
   7  10  -2  380.43   23.28
   6  10  -2   14.38    8.41
   6  10  -2   14.33    4.98
  -6 -10   2   17.19    7.40
   5  10  -2  758.14   28.96
   5  10  -2  699.15   17.31
  -5 -10   2  758.25   25.28
   4  10  -2  709.37   26.31
  -4 -10   2  696.71   23.58
  -3 -10   2  400.45   16.70
   3  10  -2  358.20   17.13
  -2 -10   2   70.86    8.99
   2  10  -2   64.83    7.00
   2  10  -2   66.79    4.20
   1  10  -2  441.02   16.98
  -1 -10   2  412.83   16.94
   0  10  -2 1151.37   30.57
  -1  10  -2  720.87   22.98
  -2  10  -2    0.83    4.54
  -3  10  -2  134.26   10.97
  -4  10  -2    0.02    5.97
  -5  10  -2 1475.99   42.64
  -7  10  -2  681.68   30.64
  -8  10  -2    9.77   11.25
  -9  10  -2  781.58   37.06
 -10  10  -2  -19.47   13.73
 -11  10  -2  373.95   30.86
 -12  10  -2   21.70   17.76
 -13  10  -2   25.65   23.28
 -14  10  -2  -20.15   25.76
 -15  10  -2   -1.01   33.52
 -16  10  -2   57.01   41.58
 -17  10  -2  101.88   61.04
  18   9  -2   -4.77   21.75
  17   9  -2  167.29   31.45
  16   9  -2   37.17   22.05
  15   9  -2  100.72   26.43
  14   9  -2  -10.14   15.91
  13   9  -2  201.61   28.86
  12   9  -2  173.36   26.47
  11   9  -2  466.24   31.94
 -10  -9   2  -11.83    7.47
  10   9  -2   -2.10    9.80
   9   9  -2   20.26   11.92
  -9  -9   2   22.65    8.86
  -8  -9   2  295.26   16.92
   8   9  -2  299.14   21.61
   7   9  -2  130.19   14.68
  -7  -9   2  142.62   12.40
   6   9  -2   86.01    6.93
   6   9  -2   65.03   12.37
  -6  -9   2   96.23   11.59
   5   9  -2  357.80   19.21
   5   9  -2  325.99   10.71
  -5  -9   2  340.67   15.93
  -4  -9   2   22.54    6.27
   4   9  -2   27.27    7.46
   3   9  -2 1365.20   36.24
  -3  -9   2 1354.42   34.68
   2   9  -2   26.79    6.23
  -2  -9   2   22.88    5.86
   1   9  -2 1530.44   35.36
  -1  -9   2 1359.37   34.92
   0   9  -2 2867.61   58.36
  -1   9  -2 1005.86   27.57
  -2   9  -2    5.04    4.94
  -3   9  -2 1600.40   40.07
  -4   9  -2  285.64   15.94
  -5   9  -2    8.84    8.00
  -6   9  -2   84.90   14.29
  -7   9  -2   18.03   11.23
  -8   9  -2  281.61   21.99
  -9   9  -2   49.49   16.51
 -10   9  -2   -5.09   10.98
 -11   9  -2   28.94   18.54
 -12   9  -2   10.31   17.50
 -13   9  -2  138.08   34.41
 -14   9  -2   85.47   34.22
 -15   9  -2  291.24   56.39
 -16   9  -2  114.12   58.55
 -17   9  -2  403.52  100.48
  18   8  -2  -14.36   18.99
  17   8  -2   16.37   21.78
  16   8  -2   22.19   21.68
  15   8  -2  -10.06   15.23
  14   8  -2    3.70   16.08
  13   8  -2  114.82   23.00
  12   8  -2  139.65   23.03
  11   8  -2 1149.72   49.32
 -10  -8   2   84.46   13.48
  10   8  -2  103.63   19.27
   9   8  -2  397.95   25.59
  -9  -8   2  398.22   19.61
  -8  -8   2   33.00    9.03
   8   8  -2   18.52   10.85
   7   8  -2 1637.07   49.46
  -7  -8   2 1613.18   42.16
   6   8  -2    4.20    5.96
  -6  -8   2    0.81    5.20
  -5  -8   2  661.82   22.63
   5   8  -2  668.19   16.62
   5   8  -2  660.94   25.97
  -4  -8   2    7.94    5.23
   4   8  -2    3.41    5.33
   3   8  -2  704.75   23.24
  -3  -8   2  673.37   21.57
   2   8  -2  583.53   19.55
  -2  -8   2  587.63   19.26
   1   8  -2 1341.89   31.47
  -1  -8   2 1218.58   31.31
   0   8  -2  204.74   10.77
   0  -8   2  218.76   11.19
  -1   8  -2  138.15    9.28
  -2   8  -2  539.01   19.07
  -3   8  -2  374.19   16.51
  -4   8  -2  385.96   18.10
  -5   8  -2   25.44    9.11
  -6   8  -2  372.95   21.55
  -7   8  -2  490.47   26.00
  -8   8  -2   45.76   14.67
  -9   8  -2  -16.99    8.30
 -10   8  -2  -22.02   13.03
 -11   8  -2  451.13   34.85
 -12   8  -2  165.48   30.65
 -13   8  -2  148.63   36.58
 -14   8  -2   90.71   30.78
 -15   8  -2   34.03   38.91
 -16   8  -2  283.07   69.94
 -17   8  -2  222.93   84.16
  18   7  -2  -27.47   17.67
  17   7  -2   57.02   24.39
  16   7  -2    0.02   16.52
  15   7  -2   15.90   19.34
  14   7  -2   -2.60   15.11
  13   7  -2    4.35   14.74
  12   7  -2  196.63   27.03
  11   7  -2  100.81   20.80
  10   7  -2  222.18   20.26
 -10  -7   2  242.01   16.90
  -9  -7   2  124.78   14.38
   9   7  -2  109.48   17.87
   8   7  -2  347.83   22.73
  -8  -7   2  382.77   18.92
   7   7  -2  407.96   22.70
  -7  -7   2  379.52   18.28
   6   7  -2  703.04   28.05
  -6  -7   2  673.53   23.37
   5   7  -2  663.88   25.49
  -5  -7   2  670.41   22.29
   4   7  -2   21.68    6.65
  -4  -7   2   26.78    6.32
  -3  -7   2  974.50   26.78
   3   7  -2 1016.15   28.37
   2   7  -2  146.07    9.25
  -2  -7   2  142.96    9.01
   1   7  -2 1981.98   41.08
  -1  -7   2 1852.63   41.41
   0   7  -2   65.55    6.73
   0  -7   2   67.61    6.72
  -1   7  -2    2.41    4.00
  -2   7  -2   25.69    6.13
  -3   7  -2  649.15   21.94
  -4   7  -2  220.01   13.75
  -5   7  -2  785.32   28.02
  -6   7  -2 1451.63   43.09
  -7   7  -2   -2.51    9.16
  -8   7  -2  186.11   17.56
 -13   7  -2   19.36   27.90
 -14   7  -2    0.91   29.89
 -15   7  -2    5.49   39.82
 -16   7  -2   96.15   58.86
 -17   7  -2  275.21  111.58
  18   6  -2   55.88   25.75
  17   6  -2   15.30   18.95
  16   6  -2  162.34   30.91
  15   6  -2   22.06   18.17
  14   6  -2   83.81   22.54
  13   6  -2   33.21   17.42
  12   6  -2  396.89   30.36
  11   6  -2  481.16   31.61
 -10  -6   2   28.54   10.59
  10   6  -2   48.64   14.88
  -9  -6   2  292.42   17.10
   9   6  -2  266.56   21.41
  -8  -6   2  167.95   13.82
   8   6  -2  189.09   17.49
   7   6  -2    5.42    8.20
  -7  -6   2    2.87    6.41
  -6  -6   2  170.48   11.25
   6   6  -2  183.21   14.53
   5   6  -2    7.43    5.73
  -5  -6   2    8.43    5.18
  -4  -6   2  758.08   22.62
   4   6  -2  744.36   24.67
  -3  -6   2  203.57   10.61
   3   6  -2  204.67   11.32
   2   6  -2  737.70   21.03
  -2  -6   2  715.59   20.73
  -1  -6   2   35.56    5.55
   1   6  -2   66.55    6.05
   0  -6   2 1569.45   34.25
   0   6  -2 1508.58   33.26
  -1   6  -2 1204.77   28.49
  -2   6  -2   14.45    5.04
  -3   6  -2   41.91    7.60
  -4   6  -2   75.77    9.32
  -5   6  -2  582.84   23.46
   7  -6   2   37.95   11.75
   8  -6   2   27.44   11.72
   9  -6   2   49.82   14.05
  10  -6   2   15.11   10.89
  11  -6   2    1.65   14.38
  12  -6   2  -12.08   13.28
  13  -6   2   30.60   18.13
 -15   6  -2  -32.28   44.40
 -16   6  -2  160.82   79.36
 -17   6  -2   95.46  106.00
  18   5  -2  -13.72   17.67
  17   5  -2   46.97   22.80
  16   5  -2   13.84   18.36
  15   5  -2   80.76   24.50
  14   5  -2  112.60   23.51
  13   5  -2   28.37   17.33
  12   5  -2  355.35   29.08
  11   5  -2  717.56   37.66
  10   5  -2  225.80   21.03
 -10  -5   2  182.16   15.56
   9   5  -2    9.72    9.42
  -9  -5   2    6.50    7.43
   8   5  -2 2746.28   70.41
  -8  -5   2 2679.03   62.34
   7   5  -2  111.17   15.04
  -7  -5   2  124.93   11.41
   6   5  -2   82.70   12.14
   5   5  -2  229.46   14.18
  -5  -5   2  229.73   12.38
   4   5  -2  538.96   19.77
  -4  -5   2  475.73   17.35
  -3  -5   2 1059.12   27.13
   3   5  -2 1073.26   28.09
  -2  -5   2 1392.21   32.12
   2   5  -2 1438.45   32.02
   1   5  -2  216.91    8.99
  -1  -5   2  214.51    9.49
   0  -5   2  974.67   23.54
   0   5  -2  958.92   23.01
   0  -5   2 1006.10   21.51
  -1   5  -2 2963.31   56.55
   1  -5   2 2961.02   55.39
   2  -5   2  125.22    8.98
  -2   5  -2  147.01    8.67
  -3   5  -2 1996.64   45.47
   3  -5   2 2087.34   46.46
  -4   5  -2  729.87   24.62
   4  -5   2  681.48   24.70
   5  -5   2   99.04   12.40
   6  -5   2  126.55   13.21
   7  -5   2  587.51   27.85
   8  -5   2    0.26    9.84
   9  -5   2   -2.33   10.05
  10  -5   2  261.32   23.53
  11  -5   2    7.18   14.39
  12  -5   2   20.46   16.24
  13  -5   2    7.80   15.55
  14  -5   2  175.11   29.65
  15  -5   2   31.35   19.12
 -17   5  -2  395.97  177.91
  18   4  -2   18.64   22.19
  17   4  -2   15.77   18.04
  16   4  -2   41.61   21.84
  15   4  -2   18.61   18.31
  14   4  -2   98.35   22.99
  13   4  -2   55.85   18.89
  12   4  -2   24.77   16.24
  11   4  -2  874.09   41.15
  10   4  -2  578.96   31.43
 -10  -4   2  558.82   25.25
   9   4  -2  353.24   23.50
  -9  -4   2  345.40   18.93
   8   4  -2   27.19    9.87
  -8  -4   2    5.12    8.95
  -7  -4   2 1782.88   44.93
   7   4  -2 1752.86   49.82
   6   4  -2   81.21   11.80
   5   4  -2  787.64   26.49
  -5  -4   2  756.93   23.64
   4   4  -2  469.25   18.20
  -4  -4   2  481.44   17.09
  -3  -4   2   59.01    6.25
   3   4  -2   64.57    6.86
  -2  -4   2   83.67    6.34
   2   4  -2   92.21    6.34
  -1  -4   2  307.33   10.92
   1   4  -2  331.68   10.50
   0  -4   2  760.66   17.12
   0   4  -2  748.97   18.33
   0  -4   2  740.80   18.55
  -1   4  -2   83.28    5.97
   1  -4   2   81.79    6.04
  -2   4  -2   44.31    6.56
   2  -4   2   40.40    6.78
   3  -4   2 2551.34   53.87
  -3   4  -2 2531.78   53.67
   4  -4   2  173.49   11.91
   4  -4   2  172.46   12.34
   5  -4   2   16.88    6.57
   5  -4   2   -0.09    6.42
   6  -4   2  577.46   25.71
   7  -4   2 1054.38   38.05
   8  -4   2  461.88   26.32
   9  -4   2   16.06   11.40
  10  -4   2   12.39   12.30
  11  -4   2  222.15   27.65
  12  -4   2   -3.47   14.73
  13  -4   2  156.19   26.58
  14  -4   2   49.55   19.94
  15  -4   2    1.79   18.17
  16  -4   2    6.16   19.98
  18   3  -2  -18.86   19.66
  17   3  -2  111.24   27.70
  16   3  -2   47.98   20.40
  15   3  -2  192.42   29.62
  14   3  -2   85.49   22.50
  13   3  -2  160.63   25.00
  12   3  -2  -19.19   11.91
  11   3  -2   49.79   14.69
 -10  -3   2    0.52   10.13
  10   3  -2   20.03   12.19
  -9  -3   2   38.24   10.72
   9   3  -2   27.03   11.41
   8   3  -2  148.84   15.63
  -8  -3   2  123.88   12.87
   7   3  -2  247.37   17.31
  -7  -3   2  216.43   14.36
   6   3  -2  102.61   10.92
   5   3  -2  114.76   10.31
  -5  -3   2  123.52    9.21
   4   3  -2  232.76   12.43
  -4  -3   2  246.51   11.73
   3   3  -2  174.06    9.63
  -3  -3   2  180.83    9.50
   2   3  -2    2.62    2.76
  -2  -3   2   -0.60    2.56
   1   3  -2 2171.53   41.17
  -1  -3   2 2236.07   43.40
   0   3  -2  899.73   20.02
   0  -3   2  890.73   20.41
   1  -3   2   39.55    4.37
  -1   3  -2   42.52    4.29
   1  -3   2   38.93    3.66
   2  -3   2 5530.71   96.55
  -2   3  -2 5479.60   98.18
   3  -3   2 1069.40   28.76
   3  -3   2 1043.02   28.42
   4  -3   2  123.06   10.49
   4  -3   2  101.67    9.68
   5  -3   2    9.12    6.66
   5  -3   2    4.08    6.25
   6  -3   2   78.32   12.95
   6  -3   2   50.62   12.25
   7  -3   2   50.58   12.58
   8  -3   2  184.44   18.09
   9  -3   2   70.07   15.31
  10  -3   2   -0.50   11.36
  11  -3   2  184.61   25.83
  12  -3   2   57.57   19.33
  13  -3   2   18.04   15.80
  14  -3   2   -4.62   15.16
  15  -3   2   52.84   23.71
  16  -3   2   35.22   21.92
  17  -3   2   84.69   28.49
  18   2  -2   25.26   22.22
  17   2  -2   11.95   18.38
  16   2  -2   12.57   18.20
  15   2  -2  237.80   32.08
  14   2  -2   28.35   17.22
  13   2  -2  142.46   24.84
  12   2  -2   59.28   18.88
  11   2  -2  812.50   39.16
  10   2  -2   46.68   14.05
 -10  -2   2   28.86   11.99
   9   2  -2  515.90   27.53
  -9  -2   2  543.97   24.18
   8   2  -2  129.73   16.74
  -8  -2   2  115.55   14.95
  -7  -2   2  123.98   11.46
   7   2  -2  141.84   13.76
   6   2  -2    5.41    5.78
   5   2  -2  515.92   20.32
  -5  -2   2  528.76   18.96
   4   2  -2   13.34    5.11
  -4  -2   2   14.46    5.42
   3   2  -2   61.08    6.59
  -3  -2   2   67.64    6.40
   2   2  -2   19.77    3.42
  -2  -2   2    9.92    3.40
  -1  -2   2  117.73    5.88
  -1   2  -2  137.21    6.51
   1  -2   2  138.52    6.78
   2  -2   2   11.71    4.52
   2  -2   2   25.82    5.50
   3  -2   2 1151.36   30.11
   3  -2   2 1118.75   29.51
   4  -2   2   22.99    6.83
   4  -2   2    8.81    5.87
   5  -2   2  275.53   16.12
   5  -2   2  276.35   16.34
   6  -2   2   82.76   13.21
   6  -2   2   58.13   12.28
   7  -2   2 1117.56   39.17
   7  -2   2 1113.05   38.33
   8  -2   2  146.56   19.09
   9  -2   2  345.15   24.31
  10  -2   2   47.96   15.75
  11  -2   2   70.95   19.22
  12  -2   2   -8.56   13.31
  13  -2   2   34.00   17.39
  14  -2   2   34.25   20.16
  15  -2   2  -21.40   13.97
  16  -2   2   30.15   23.01
  17  -2   2  -13.24   18.56
  18   1  -2  -19.82   19.09
  17   1  -2   43.49   22.44
  16   1  -2   31.04   19.87
  15   1  -2  153.85   27.35
  14   1  -2   82.30   20.16
  13   1  -2   19.03   16.18
  12   1  -2   44.43   17.11
  11   1  -2  467.86   30.13
 -10  -1   2  130.29   15.15
  10   1  -2  173.42   18.61
  -9  -1   2    5.17    8.96
   9   1  -2   32.21   11.34
   8   1  -2  619.24   28.51
   7   1  -2  143.81   13.66
   6   1  -2   -2.73    5.45
   5   1  -2  491.19   19.61
   4   1  -2   57.95    7.84
   3   1  -2  318.43   12.10
   2   1  -2  185.62    7.28
  -1  -1   2 1031.19   22.91
   1  -1   2   23.69    3.68
   1  -1   2   11.74    3.06
   2  -1   2   36.52    5.62
   2  -1   2   22.03    4.87
   3  -1   2 1964.76   42.67
   3  -1   2 1933.85   43.67
   4  -1   2 1557.67   38.77
   4  -1   2 1560.64   39.92
   5  -1   2  526.47   21.70
   5  -1   2  535.03   22.59
   6  -1   2  249.91   17.58
   6  -1   2  219.42   16.32
   7  -1   2   46.53   10.71
   7  -1   2   36.03   11.35
   8  -1   2  258.32   20.11
   8  -1   2  280.28   20.27
   9  -1   2    9.26    9.90
  10  -1   2  342.98   25.55
  11  -1   2  287.55   26.40
  12  -1   2    4.17   14.65
  13  -1   2    1.08   14.82
  14  -1   2  179.58   29.82
  15  -1   2    4.59   18.24
  16  -1   2  -18.64   15.77
  17  -1   2  -25.90   19.75
  18   0  -2  117.81   27.77
  17   0  -2   -9.65   14.70
  16   0  -2  228.90   32.97
  15   0  -2   28.58   18.51
  14   0  -2  196.80   28.32
  13   0  -2    1.78   12.20
  12   0  -2  193.01   21.82
 -11   0   2  -33.71   10.61
  11   0  -2   10.78   12.53
  10   0  -2  792.26   35.76
   9   0  -2  -11.55    7.08
   8   0  -2   97.09   15.17
   7   0  -2   -4.39    6.47
   6   0  -2  101.19   10.48
   5   0  -2    1.13    5.14
   4   0  -2 1135.09   29.39
   3   0  -2   -4.33    3.22
   1   0   2   -0.93    1.73
   1   0   2   -2.47    1.65
   2   0   2  169.88    9.05
   2   0   2  160.62    8.42
   3   0   2    4.32    5.15
   3   0   2   -0.88    5.30
   4   0   2 1382.25   36.73
   4   0   2 1343.58   34.86
   5   0   2   -1.08    5.25
   5   0   2   -0.03    4.62
   6   0   2 3729.20   82.22
   6   0   2 3640.41   78.74
   7   0   2  -17.92    6.98
   7   0   2   -8.31    7.37
   8   0   2  265.84   19.80
  -8   0  -2  242.12   12.44
   8   0   2  306.28   20.79
   9   0   2   -8.01    9.02
  10   0   2   54.39   15.81
  11   0   2    1.45   13.05
  12   0   2  238.17   30.06
  13   0   2  -12.20   14.13
  14   0   2  242.17   29.59
  15   0   2  -22.51   16.95
  16   0   2  -30.53   18.92
  17   0   2   -0.21   20.49
  18  -1  -2   -3.64   20.35
  17  -1  -2   17.61   19.90
  16  -1  -2   43.08   21.00
  15  -1  -2   94.57   23.42
  14  -1  -2  163.69   25.84
  13  -1  -2   -0.41   12.43
  12  -1  -2   17.38   14.60
  11  -1  -2  434.37   29.04
  10  -1  -2  147.94   20.38
   9  -1  -2   14.92    9.89
   8  -1  -2  621.28   28.13
   7  -1  -2  157.12   13.92
   6  -1  -2   -1.30    5.05
   5  -1  -2  476.03   18.95
   4  -1  -2   66.78    7.97
   3  -1  -2  325.66   12.06
   1   1   2   18.18    3.29
   1   1   2   16.88    3.30
   2   1   2   20.19    5.06
   2   1   2   19.64    4.59
   3   1   2 1959.17   43.97
   3   1   2 1913.45   41.34
   4   1   2 1543.59   39.48
   4   1   2 1453.00   36.61
   5   1   2  565.04   22.10
   5   1   2  595.49   24.00
   6   1   2  245.80   17.50
  -6  -1  -2  208.02    9.38
   6   1   2  216.34   15.70
  -7  -1  -2   44.14    6.70
   7   1   2   49.15   12.38
   7   1   2   18.14    9.61
  -8  -1  -2  260.14   12.11
   8   1   2  285.17   21.18
   8   1   2  275.61   19.76
   9   1   2    3.52    9.96
   9   1   2    8.38   11.00
  10   1   2  334.52   25.57
  11   1   2  284.86   25.58
  12   1   2   -8.03   13.53
  13   1   2    5.84   16.35
  14   1   2  164.63   29.08
  15   1   2   29.93   20.32
  16   1   2   -4.93   16.22
  17   1   2  -20.37   19.81
  18  -2  -2   13.64   19.67
  17  -2  -2   12.06   18.65
  16  -2  -2   18.32   19.32
  15  -2  -2  245.20   32.72
  14  -2  -2   22.46   15.66
  13  -2  -2  127.86   23.77
  12  -2  -2   58.24   17.94
  11  -2  -2  849.81   39.34
  10  -2  -2   41.37   13.55
   9  -2  -2  514.03   26.98
   8  -2  -2  122.68   16.66
   7  -2  -2  138.49   13.30
   6  -2  -2   -1.11    4.90
   5  -2  -2  524.28   19.78
   4  -2  -2   18.52    5.27
   3  -2  -2   55.33    5.96
  -1   2   2  114.70    5.21
   0   2   2  277.18    8.47
   1   2   2  135.70    6.34
   1   2   2  138.51    6.53
   2   2   2   14.28    4.60
   2   2   2   18.55    4.48
   3   2   2 1085.85   27.39
   3   2   2 1114.80   29.60
   4   2   2   13.53    5.72
   4   2   2   19.33    6.75
   5   2   2  275.47   15.03
   5   2   2  262.21   16.17
   6   2   2   89.83   12.74
  -6  -2  -2   51.61    5.46
   6   2   2   67.78   12.76
  -7  -2  -2 1060.07   25.30
   7   2   2 1109.21   36.87
   7   2   2 1053.05   38.42
   8   2   2  142.80   18.70
   8   2   2  135.69   17.81
   9   2   2  339.09   24.19
   9   2   2  286.68   21.27
  10   2   2   66.69   17.03
  11   2   2  108.16   21.31
  12   2   2  -21.69   10.76
  13   2   2   40.62   18.31
  14   2   2   32.65   19.32
  15   2   2   -0.90   18.35
  16   2   2   29.66   22.67
  17   2   2    1.97   21.44
  18  -3  -2  -15.77   19.77
  17  -3  -2  100.16   26.76
  16  -3  -2   29.95   20.22
  15  -3  -2  222.29   31.52
  14  -3  -2  137.77   24.85
  13  -3  -2  235.44   29.19
  12  -3  -2   -4.54   11.52
  11  -3  -2   39.14   15.81
  10  -3  -2    4.41   10.22
   9  -3  -2   31.14   11.26
   8  -3  -2  127.11   14.51
   7  -3  -2  206.74   15.44
   6  -3  -2  111.06   10.70
   5  -3  -2  118.78    9.76
   4  -3  -2  235.75   11.50
   3  -3  -2  170.00    8.68
   0   3   2  885.65   19.56
   1   3   2   42.55    4.22
   1   3   2   41.59    4.12
   2   3   2 5507.39   98.16
   2   3   2 5408.32   93.45
   3   3   2 1050.32   26.88
   3   3   2 1109.50   29.85
   4   3   2   96.05    9.92
   4   3   2  100.92    8.55
   5   3   2    4.24    5.66
   5   3   2   -0.74    5.92
   6   3   2   63.87   11.38
   6   3   2   49.83   11.83
  -6  -3  -2   54.38    5.89
  -7  -3  -2   69.55    7.54
   7   3   2   82.22   14.98
   7   3   2   80.04   13.31
   8   3   2  169.07   16.94
   8   3   2  173.24   17.42
   9   3   2   72.39   14.86
   9   3   2   79.07   16.12
  10   3   2   -6.20    7.78
  10   3   2   -1.74    8.94
  11   3   2  202.82   26.02
  12   3   2   62.96   19.62
  13   3   2   11.36   14.86
  14   3   2   25.78   16.81
  15   3   2   68.27   22.67
  16   3   2   33.24   22.20
  17   3   2   83.73   27.52
  18  -4  -2   20.91   22.17
  17  -4  -2   26.03   21.91
  16  -4  -2   95.57   24.90
  15  -4  -2    9.26   17.95
  14  -4  -2  124.87   24.03
  13  -4  -2   48.31   18.70
  12  -4  -2   37.93   16.64
  11  -4  -2  931.13   41.50
  10  -4  -2  608.17   31.31
   9  -4  -2  370.05   23.40
   8  -4  -2   27.96   10.59
   7  -4  -2 1798.73   48.68
   6  -4  -2   86.57   11.31
   5  -4  -2  801.91   25.30
   4  -4  -2  488.75   17.15
   3  -4  -2   67.39    5.82
  -2   4   2   94.30    5.04
  -1   4   2  319.23   10.40
   0   4   2  790.01   18.43
   1   4   2   82.00    5.72
   1   4   2   86.66    5.82
   2   4   2   33.67    5.50
   2   4   2   34.28    6.10
   3   4   2 2490.21   49.81
   3   4   2 2521.50   54.01
   4   4   2  169.42   12.21
   4   4   2  167.39   10.44
  -5  -4  -2   22.83    3.80
   5   4   2    9.55    7.26
   5   4   2   15.29    6.50
  -6  -4  -2  514.30   14.62
   6   4   2  566.10   23.09
   6   4   2  551.02   25.47
  -7  -4  -2  977.40   23.96
   7   4   2 1058.32   38.57
   7   4   2 1040.68   35.04
   8   4   2  446.03   26.13
   8   4   2  452.80   24.58
   9   4   2   17.03   11.83
   9   4   2   47.96   13.75
  10   4   2    7.66   11.19
  10   4   2   16.98   11.23
  11   4   2  169.56   24.73
  12   4   2   -5.77   14.40
  13   4   2  120.74   25.42
  14   4   2   52.23   21.48
  15   4   2    1.35   18.10
  16   4   2    0.05   20.42
  17   4   2   20.71   22.87
  17  -5  -2   40.16   21.36
  16  -5  -2   12.61   18.59
  15  -5  -2   69.55   22.35
  14  -5  -2  129.10   24.38
  13  -5  -2   29.86   16.98
  12  -5  -2  319.70   26.60
  11  -5  -2  792.09   38.30
  10  -5  -2  252.64   21.83
   9  -5  -2    8.20    9.73
   8  -5  -2 2932.42   71.61
   7  -5  -2  133.47   13.12
   6  -5  -2   81.17   11.16
   5  -5  -2  235.83   13.20
   4  -5  -2  530.54   17.77
  -3   5   2 1115.11   25.84
  -2   5   2 1482.22   29.71
  -1   5   2  219.78    8.98
   0   5   2 1001.16   22.40
   0   5   2  977.48   21.29
   1   5   2 2920.44   53.05
   1   5   2 2894.64   55.12
   2   5   2  133.81    8.87
   2   5   2  143.96    7.88
   3   5   2 2045.97   46.65
   3   5   2 2033.23   42.41
  -4  -5  -2  707.61   16.60
   4   5   2  728.43   25.48
   4   5   2  719.24   22.37
   5   5   2   96.71    9.28
  -5  -5  -2   87.48    5.57
   5   5   2   95.02   10.49
  -6  -5  -2  106.86    6.69
   6   5   2  103.50   12.82
   6   5   2  119.52   15.67
   7   5   2  561.91   25.07
   7   5   2  561.30   27.76
  -7  -5  -2  535.72   16.07
   8   5   2   -4.26    9.24
   8   5   2    1.29    8.48
   9   5   2   -2.90    8.58
   9   5   2  -21.23    7.75
  10   5   2  242.64   22.74
  10   5   2  271.07   21.30
  11   5   2   41.49   16.85
  12   5   2   35.75   18.29
  13   5   2  -14.28   13.99
  14   5   2  169.00   28.56
  15   5   2   49.74   21.54
  16   5   2    2.35   19.16
  17   5   2   61.91   27.20
  16  -6  -2  165.76   29.78
  15  -6  -2   61.41   21.23
  14  -6  -2   77.11   21.91
  13  -6  -2   39.36   16.47
  12  -6  -2  457.84   31.32
  11  -6  -2  517.47   31.76
  10  -6  -2   37.61   13.14
   9  -6  -2  295.21   21.04
   8  -6  -2  168.58   16.10
   7  -6  -2   14.48    8.79
   6  -6  -2  192.11   13.85
  -4   6   2  773.72   22.50
  -3   6   2  211.19    9.55
  -2   6   2  788.76   18.86
  -1   6   2   39.15    4.09
  -1   6   2   47.94    5.31
   0   6   2 1577.29   32.30
   0   6   2 1541.33   31.48
   1   6   2 1218.57   26.77
   1   6   2 1184.92   27.76
   2   6   2   10.29    4.73
   2   6   2   12.15    4.06
   3   6   2   41.66    6.71
   3   6   2   25.18    6.60
   4   6   2   76.68   10.55
   4   6   2   80.20    7.98
  -5  -6  -2  546.76   14.96
   5   6   2  549.87   20.65
   5   6   2  561.62   24.35
  -6  -6  -2  102.66    7.01
   6   6   2   91.94   14.69
   6   6   2  120.44   11.28
   7   6   2   48.77   11.73
   7   6   2   40.24   11.02
  -7  -6  -2   40.85    6.53
   8   6   2   20.63   11.53
   8   6   2   15.96   10.51
   9   6   2   35.36   12.38
   9   6   2   59.43   15.43
  10   6   2   26.56   12.68
  10   6   2   33.53   15.10
  11   6   2   38.64   16.94
  11   6   2   20.45   13.49
  12   6   2    0.77   14.70
  13   6   2   -0.07   14.57
  14   6   2   32.93   20.59
  15   6   2   -5.62   18.05
  16   6   2   77.06   24.79
  17   6   2    8.32   21.34
 -17   7   2  345.15  246.73
  14  -7  -2   11.18   16.77
  13  -7  -2    5.85   13.56
  12  -7  -2  176.37   23.78
  11  -7  -2  122.93   21.81
  10  -7  -2  246.92   21.21
   9  -7  -2  129.59   18.15
   8  -7  -2  386.68   22.32
   7  -7  -2  404.65   21.35
  -6   7   2  729.02   26.17
  -5   7   2  674.27   22.81
  -4   7   2   27.33    5.97
  -3   7   2 1063.99   25.88
  -2   7   2  130.82    7.26
  -1   7   2 1878.76   39.27
  -1   7   2 1960.71   37.80
   0   7   2   66.37    5.86
   0   7   2   65.35    6.02
   1   7   2    0.21    3.22
   1   7   2   -3.46    3.20
   2   7   2   47.65    6.14
   2   7   2   30.10    6.58
   3   7   2  634.65   19.09
   3   7   2  600.90   21.95
   4   7   2  220.16   11.98
   4   7   2  213.40   14.05
  -5  -7  -2  782.33   19.62
   5   7   2  781.79   25.27
   5   7   2  750.01   28.93
   6   7   2 1463.70   45.43
  -6  -7  -2 1458.79   31.99
   6   7   2 1485.53   40.19
   7   7   2    1.15    6.62
  -7  -7  -2    5.33    4.80
   7   7   2    0.89    9.17
   8   7   2  163.09   15.89
   8   7   2  223.86   19.75
   9   7   2   -1.81    9.05
   9   7   2   -7.68    8.47
  10   7   2  172.25   21.18
  10   7   2  157.63   23.39
  11   7   2    8.36   14.44
  11   7   2   -2.71   10.99
  12   7   2  181.17   26.30
  13   7   2    4.69   17.16
  14   7   2   31.22   18.49
  15   7   2   -2.54   17.95
  16   7   2   36.46   23.03
  17   7   2   39.00   23.16
 -17   8   2   13.74  114.35
 -16   8   2  109.88   71.30
 -15   8   2  -42.07   41.62
  12  -8  -2  147.06   21.97
  11  -8  -2 1148.85   46.10
  10  -8  -2  110.22   18.79
  -7   8   2 1769.68   48.06
  -6   8   2   -9.22    5.41
  -5   8   2  718.14   23.97
  -4   8   2   16.09    5.46
  -3   8   2  764.42   21.18
  -2   8   2  604.91   17.22
  -1   8   2 1299.18   30.50
  -1   8   2 1353.46   28.87
   0   8   2  221.08   10.37
   0   8   2  215.40    9.52
   1   8   2  138.55    8.69
   1   8   2  136.27    8.07
   2   8   2  490.54   18.15
   2   8   2  513.79   16.37
   3   8   2  370.51   14.40
   3   8   2  345.85   16.60
   4   8   2  372.99   15.51
   4   8   2  365.67   18.53
   5   8   2   27.73    8.19
   5   8   2   18.32    7.21
   6   8   2  323.50   20.74
  -6  -8  -2  339.48   12.75
   6   8   2  368.56   18.42
   7   8   2  490.94   22.47
   7   8   2  431.49   24.44
  -7  -8  -2  442.15   15.15
   8   8   2   66.72   15.05
   8   8   2   58.86   12.65
   9   8   2   -9.10    7.59
   9   8   2   -6.04    9.41
  10   8   2    1.20   11.39
  10   8   2    1.10   10.57
  11   8   2  368.79   26.18
  11   8   2  364.60   29.11
  12   8   2   68.39   20.91
  13   8   2   85.65   21.57
  14   8   2   50.74   22.83
  15   8   2   32.18   20.81
  16   8   2  123.42   29.59
  17   8   2   61.31   25.84
 -17   9   2 1049.55  159.31
 -16   9   2   67.30   63.49
 -15   9   2  331.80   62.56
 -14   9   2    3.90   29.63
 -13   9   2  301.25   42.19
 -12   9   2  247.10   34.56
 -11   9   2  746.30   41.56
 -10   9   2   -1.88   11.74
  -9   9   2   41.53   13.40
  -8   9   2  302.10   20.24
  -7   9   2  151.68   13.88
  -6   9   2  106.09   12.73
  -5   9   2  353.22   16.49
  -4   9   2   24.10    6.17
  -3   9   2 1478.08   34.10
  -2   9   2   22.84    5.17
  -1   9   2 1516.22   34.37
  -1   9   2 1468.87   32.16
   0   9   2 2891.71   55.29
   0   9   2 2853.72   55.56
   1   9   2  997.30   24.97
   1   9   2 1022.74   26.72
   2   9   2   -2.45    4.30
   2   9   2    1.07    3.98
   3   9   2 1562.85   40.64
   3   9   2 1532.21   35.52
   4   9   2  252.17   15.98
   4   9   2  277.49   13.28
   5   9   2    1.55    5.87
   5   9   2   -2.88    7.13
   6   9   2   56.81   10.19
   6   9   2   69.82   13.93
  -7  -9  -2   43.84    7.09
   7   9   2   22.25    9.47
   7   9   2   27.32   11.54
   8   9   2  269.77   18.36
   8   9   2  254.90   21.69
   9   9   2   43.94   13.21
   9   9   2   50.43   15.49
  10   9   2   -3.30    9.04
  10   9   2    2.28   10.96
  11   9   2   25.52   14.25
  11   9   2   24.78   13.39
  12   9   2    1.70   14.58
  13   9   2   50.50   21.11
  14   9   2   25.37   19.86
  15   9   2  149.77   30.12
  16   9   2   56.05   23.67
  17   9   2   68.81   27.71
 -18  10   2  -26.87  162.25
 -17  10   2  189.83   91.72
 -16  10   2  412.74   78.16
 -15  10   2    3.67   34.64
 -14  10   2    4.44   24.87
 -13  10   2  284.73   39.06
 -12  10   2  274.45   29.98
 -11  10   2    7.28   15.92
 -10  10   2   32.40   14.16
  -9  10   2  256.93   20.28
  -8  10   2  404.29   22.83
  -7  10   2  388.68   20.73
  -6  10   2   20.33    8.16
  -5  10   2  794.25   26.21
  -4  10   2  770.97   23.98
  -3  10   2  452.23   16.50
  -2  10   2   77.99    7.09
  -1  10   2  427.69   14.62
  -1  10   2  443.42   16.29
   0  10   2 1131.11   28.06
   0  10   2 1164.50   28.22
   1  10   2  674.98   21.22
   1  10   2  676.60   20.00
   2  10   2   -1.52    4.52
   2  10   2   -3.86    3.39
   3  10   2  114.19    8.59
   3  10   2  119.16   11.05
   4  10   2   -6.16    5.55
   4  10   2    1.98    5.01
   5  10   2 1364.08   35.79
   5  10   2 1368.41   42.57
   6  10   2  138.17   12.33
   7  10   2  611.86   30.30
   7  10   2  629.49   25.87
   8  10   2    3.76   10.42
   8  10   2    7.82    8.09
   9  10   2  646.45   30.10
   9  10   2  606.14   32.84
  10  10   2   -9.02    9.74
  10  10   2   10.55   13.89
  11  10   2  344.41   25.79
  11  10   2  304.03   27.99
  12  10   2   16.09   16.53
  13  10   2    8.97   15.49
  14  10   2    0.43   18.36
  15  10   2    1.28   18.13
  16  10   2   27.17   22.06
  17  10   2   38.56   25.21
 -18  11   2 -120.73  109.07
 -17  11   2  -36.54   59.46
 -16  11   2  130.27   52.97
 -15  11   2   13.92   32.75
 -14  11   2   96.47   32.39
 -13  11   2  302.44   39.82
 -12  11   2  430.43   35.40
 -11  11   2    8.69   16.00
 -10  11   2  223.13   26.33
  -9  11   2   -7.15    8.46
  -8  11   2  395.34   22.68
  -7  11   2   57.91   11.46
  -6  11   2  467.15   21.09
  -5  11   2   31.64    8.72
  -4  11   2  790.55   25.16
  -3  11   2   80.48    8.20
  -2  11   2   25.83    6.08
  -1  11   2   32.45    6.46
  -1  11   2   44.88    6.56
   0  11   2  154.10    9.53
   0  11   2  175.40    9.84
   1  11   2  762.43   22.16
   1  11   2  780.41   23.98
   2  11   2   70.64    9.83
   2  11   2   62.85    8.54
   3  11   2   49.37    9.72
   3  11   2   44.87    7.80
   4  11   2  369.93   16.08
   4  11   2  341.34   19.47
   5  11   2 1339.61   42.90
   5  11   2 1433.40   36.98
   6  11   2  574.31   28.20
   6  11   2  544.28   22.33
   7  11   2   32.46   12.36
   7  11   2   33.02    9.82
   8  11   2  428.83   27.36
   8  11   2  433.73   23.06
   9  11   2   42.79   15.25
   9  11   2   47.32   12.62
  10  11   2  425.28   30.53
  10  11   2  367.14   24.98
  11  11   2   12.92   15.60
  12  11   2  115.21   24.41
  13  11   2  391.40   33.64
  14  11   2   30.26   21.49
  15  11   2   26.36   20.05
  16  11   2   20.32   22.69
  17  11   2   56.02   26.52
 -18  12   2  400.93  108.30
 -17  12   2   33.62   48.65
 -16  12   2  398.94   66.61
 -15  12   2  -12.06   27.77
 -14  12   2  358.47   38.41
 -13  12   2   62.83   23.63
 -12  12   2   23.36   19.20
 -11  12   2  497.34   32.34
 -10  12   2   24.02   13.84
  -9  12   2   23.01   11.63
  -8  12   2    6.27    8.85
  -7  12   2   96.16   13.97
  -6  12   2  253.98   16.55
  -5  12   2    7.48    7.16
  -4  12   2  593.87   21.78
  -3  12   2   66.82    8.92
  -2  12   2 1486.26   38.43
  -2  12   2 1532.54   36.05
  -1  12   2  172.75   10.96
  -1  12   2  175.75   10.35
   0  12   2  319.20   14.12
   0  12   2  287.19   13.34
   1  12   2 1612.20   39.28
   1  12   2 1565.61   36.40
   2  12   2  533.59   21.07
   2  12   2  516.64   18.05
   3  12   2   36.37    7.55
   3  12   2   38.23    9.42
   4  12   2 1146.42   30.85
   4  12   2 1066.62   36.09
   5  12   2   49.37   12.10
   5  12   2   26.61    8.17
   6  12   2  250.68   15.77
   6  12   2  282.75   20.71
   7  12   2    2.74    6.97
   7  12   2   -4.34    9.53
   8  12   2   16.59   12.13
   8  12   2   25.00   10.59
   9  12   2   68.15   17.60
   9  12   2   47.59   13.63
  10  12   2   96.35   17.80
  10  12   2   88.93   19.26
  11  12   2  -18.01   13.02
  12  12   2  262.37   32.79
  13  12   2   28.05   19.33
  14  12   2  180.07   31.17
  15  12   2   -3.34   17.96
  16  12   2  119.04   30.40
 -17  13   2  307.69   68.30
 -16  13   2   83.02   40.55
 -15  13   2  313.36   48.19
 -14  13   2  145.51   33.95
 -13  13   2   44.36   23.09
 -12  13   2   26.09   18.91
 -11  13   2   15.37   16.28
 -10  13   2  417.28   27.27
  -9  13   2    2.12    9.19
  -8  13   2  111.91   15.92
  -7  13   2  230.08   16.60
  -6  13   2  108.10   13.56
  -5  13   2  685.38   25.37
  -4  13   2 2553.58   56.88
  -3  13   2   80.01   10.00
  -2  13   2  516.11   20.29
  -2  13   2  470.29   17.92
  -1  13   2  332.56   14.63
  -1  13   2  330.74   15.46
   0  13   2 1902.59   43.34
   0  13   2 1968.72   44.41
   1  13   2  307.00   14.31
   1  13   2  294.51   15.22
   2  13   2   20.43    7.96
   2  13   2   13.50    6.51
   3  13   2  441.20   21.24
   3  13   2  454.38   17.58
   4  13   2 1014.03   29.31
   4  13   2  994.00   34.99
   5  13   2   99.69   12.34
   5  13   2   92.95   14.81
   6  13   2  465.30   20.97
   6  13   2  472.15   26.48
   7  13   2   62.48   11.90
   7  13   2   38.47   13.70
   8  13   2 1192.83   39.37
   8  13   2 1185.43   46.64
   9  13   2   17.72   10.43
   9  13   2    9.70   12.97
  10  13   2  277.58   26.40
  11  13   2  -11.96   13.30
  12  13   2  150.27   25.09
  13  13   2   -5.15   14.45
  14  13   2    3.15   17.89
  15  13   2   41.74   24.05
  16  13   2    4.87   23.31
 -17  14   2   18.13   42.64
 -16  14   2   37.78   31.34
 -15  14   2  269.16   44.48
 -14  14   2  267.21   39.06
 -13  14   2  132.78   28.30
 -12  14   2   -8.31   17.79
 -11  14   2  321.05   26.59
 -10  14   2  146.19   21.36
  -9  14   2  427.10   25.85
  -8  14   2  245.23   18.57
  -7  14   2   70.77   13.55
  -6  14   2  106.86   12.09
  -5  14   2  560.55   23.01
  -4  14   2   29.13    8.58
  -3  14   2 1167.80   32.66
  -2  14   2 1110.17   32.92
  -2  14   2 1054.35   29.96
  -1  14   2   65.60    9.09
  -1  14   2   66.87    9.46
   0  14   2 1546.76   38.73
   0  14   2 1570.36   38.11
   1  14   2  552.50   19.92
   1  14   2  542.17   21.53
   2  14   2  748.91   27.02
   2  14   2  734.65   23.32
   3  14   2   63.05   11.82
   3  14   2   70.95    9.97
   4  14   2 1681.14   41.13
   4  14   2 1624.15   47.75
   5  14   2 1175.73   41.04
   5  14   2 1166.02   33.67
   6  14   2   -2.98    9.56
   6  14   2    8.94    7.72
   7  14   2  430.30   21.44
   7  14   2  439.03   27.23
   8  14   2   70.57   16.45
   8  14   2   69.52   13.94
   9  14   2 1036.23   38.21
   9  14   2  971.84   44.46
  10  14   2   65.26   18.41
  11  14   2   47.59   19.75
  12  14   2  175.99   28.79
  13  14   2   40.91   22.06
  14  14   2   -8.30   19.05
  15  14   2    7.02   20.45
  16  14   2   46.12   26.67
 -17  15   2  298.22   63.25
 -16  15   2   96.69   36.86
 -15  15   2  198.42   39.47
 -14  15   2  233.33   36.10
 -13  15   2  285.62   35.18
 -12  15   2  -10.89   15.78
 -11  15   2  113.32   22.98
 -10  15   2   10.98   13.49
  -9  15   2   36.74   13.03
  -8  15   2  101.96   16.16
  -7  15   2   69.44   12.81
  -6  15   2  441.00   22.47
  -5  15   2  595.32   24.50
  -4  15   2  212.13   14.30
  -3  15   2   52.08    9.53
  -2  15   2    1.43    6.30
  -1  15   2 1191.98   33.05
  -1  15   2 1211.02   34.15
   1  15   2 4675.90   88.53
   1  15   2 4789.23   94.23
   2  15   2   -6.88    6.41
   2  15   2   -9.25    5.56
   3  15   2  138.30   10.88
   3  15   2  142.54   13.48
   4  15   2  385.34   17.86
   4  15   2  332.63   20.66
   5  15   2 1272.01   43.94
   5  15   2 1361.49   37.12
   6  15   2    3.54    9.15
   6  15   2    2.43    7.53
   7  15   2   24.60   10.62
   7  15   2   34.79   10.61
   8  15   2   30.19   10.97
   8  15   2   65.92   16.93
   9  15   2   64.12   18.58
  10  15   2   35.94   17.23
  11  15   2   14.13   16.29
  12  15   2  124.60   26.95
  13  15   2  319.00   32.27
  14  15   2   -4.04   19.71
  15  15   2   18.55   22.80
  16  15   2   -2.52   22.45
 -17  16   2   -4.89   32.41
 -16  16   2  118.84   36.62
 -15  16   2   21.62   26.43
 -14  16   2  276.05   37.99
 -13  16   2   14.25   17.68
 -12  16   2  -19.83   14.07
 -11  16   2   -5.76   13.99
 -10  16   2   23.47   14.40
  -9  16   2  595.66   30.55
  -8  16   2   -9.32    8.66
  -7  16   2  827.97   32.73
  -6  16   2  236.75   16.77
  -5  16   2  533.14   23.78
  -4  16   2   -9.81    5.86
  -3  16   2 2074.87   50.01
  -2  16   2    8.42    7.39
  -2  16   2    0.17    7.22
  -1  16   2  118.94   11.74
  -1  16   2  111.39   10.38
   0  16   2  627.90   22.81
   0  16   2  622.54   23.29
   1  16   2  101.99   11.11
   2  16   2   12.63    8.79
   2  16   2   14.99    7.21
   3  16   2  267.92   17.71
   3  16   2  260.57   14.16
   4  16   2  316.68   20.50
   4  16   2  352.57   17.36
   5  16   2  562.03   28.68
   5  16   2  569.21   23.03
   6  16   2  172.97   18.13
   6  16   2  169.02   13.62
   7  16   2   32.94   13.69
   7  16   2   29.26   10.25
   8  16   2   32.67   11.12
   8  16   2   38.09   14.60
   9  16   2  362.50   28.61
  10  16   2   31.66   17.40
  11  16   2   70.93   22.22
  12  16   2   88.60   24.37
  13  16   2  126.84   28.40
  14  16   2   36.24   24.00
  15  16   2   -3.57   21.70
  16  16   2   -5.53   21.22
 -17  17   2  -29.81   31.44
 -16  17   2  -25.45   26.20
 -15  17   2   11.38   23.91
 -14  17   2   60.12   24.94
 -13  17   2   59.01   22.26
 -12  17   2    3.37   14.41
 -11  17   2  212.60   23.75
 -10  17   2  967.64   41.66
  -9  17   2    3.13   12.58
  -8  17   2   21.15   12.67
  -7  17   2  109.81   16.10
  -6  17   2  324.89   19.77
  -5  17   2  179.00   14.83
  -4  17   2  186.31   14.04
  -3  17   2  620.06   24.10
  -2  17   2   70.99   11.08
  -2  17   2   82.87   12.05
  -1  17   2   90.53   11.68
  -1  17   2   74.56   11.77
   0  17   2   85.54   11.60
   0  17   2   86.52   11.43
   1  17   2  722.14   25.07
   1  17   2  783.46   28.14
   2  17   2  318.05   15.80
   2  17   2  310.36   18.51
   3  17   2   81.33   11.36
   3  17   2   66.42   12.72
   4  17   2  358.40   17.85
   4  17   2  368.65   22.23
   5  17   2  149.15   19.33
   5  17   2  115.35   12.01
   6  17   2  245.91   20.05
   6  17   2  258.84   16.38
   7  17   2   19.40    9.09
   7  17   2   15.86   11.74
   8  17   2  515.17   32.19
   9  17   2    2.51   10.74
  10  17   2  135.96   24.54
  11  17   2   -3.37   15.81
  12  17   2   59.75   21.32
  13  17   2   53.91   22.94
  14  17   2   21.43   22.66
  15  17   2   37.83   24.73
  16  17   2   -3.67   21.29
 -17  18   2  -30.92   31.54
 -16  18   2   60.87   32.94
 -15  18   2  147.67   33.01
 -14  18   2  318.87   38.99
 -13  18   2   -6.73   16.93
 -12  18   2   63.35   20.65
 -11  18   2   12.97   15.88
 -10  18   2  409.74   28.04
  -9  18   2  -13.59   11.57
  -8  18   2   -5.64   10.57
  -7  18   2  157.24   16.14
  -6  18   2  266.69   18.68
  -5  18   2   62.15   12.15
  -4  18   2  833.32   30.01
  -3  18   2   35.22    9.57
  -2  18   2 2274.70   54.82
  -2  18   2 2357.30   58.08
  -1  18   2  380.78   19.76
  -1  18   2  391.04   18.89
   0  18   2 1037.40   31.69
   0  18   2 1025.02   32.92
   1  18   2  481.82   22.40
   1  18   2  507.02   20.67
   2  18   2 1206.39   33.86
   2  18   2 1170.35   38.20
   3  18   2   83.55   11.49
   3  18   2   67.66   13.20
   4  18   2  903.79   35.63
   4  18   2  868.12   28.97
   5  18   2   15.65   10.73
   5  18   2    2.59    7.45
   6  18   2    5.29    7.68
   6  18   2   -0.42   10.08
   7  18   2   -2.67   10.58
   7  18   2   -3.45    7.39
   8  18   2   85.69   20.09
   9  18   2  132.50   24.21
  10  18   2   23.92   17.54
  11  18   2   49.35   20.88
  12  18   2   77.95   22.98
  13  18   2    4.38   20.52
  14  18   2   54.38   25.58
  15  18   2  -19.73   20.00
  16  18   2  183.23   36.97
 -17  19   2   33.67   39.10
 -16  19   2   63.61   31.70
 -15  19   2   66.81   27.65
 -14  19   2    3.74   20.18
 -13  19   2   62.36   22.71
 -12  19   2    4.99   16.87
 -11  19   2   70.00   19.34
 -10  19   2  781.91   37.86
  -9  19   2   -1.33   13.39
  -8  19   2  206.54   19.22
  -7  19   2   18.09   12.12
  -6  19   2 1060.87   37.74
  -5  19   2  447.40   23.05
  -4  19   2  245.10   16.75
  -3  19   2  500.23   25.52
  -3  19   2  501.03   23.13
  -2  19   2  126.05   12.15
  -1  19   2  368.61   19.62
  -1  19   2  368.22   18.82
   0  19   2   69.63   10.81
   1  19   2  777.60   29.90
   1  19   2  779.58   26.73
   2  19   2 1001.11   30.93
   2  19   2 1000.30   35.51
   3  19   2   66.25   13.48
   3  19   2   51.72   10.01
   4  19   2    0.85    7.18
   4  19   2   -2.26    8.62
   5  19   2    8.57   10.30
   5  19   2   10.71    7.89
   6  19   2  361.07   25.57
   6  19   2  337.01   19.59
   7  19   2  -14.85   10.52
   8  19   2  159.30   24.45
   9  19   2   11.54   15.10
  10  19   2   55.70   19.99
  11  19   2   -3.08   17.04
  12  19   2  305.70   31.63
  13  19   2   84.63   27.51
  14  19   2   -7.57   19.49
  15  19   2    5.19   22.68
  16  19   2   32.84   27.35
 -16  20   2   79.30   27.43
 -15  20   2   48.09   25.28
 -14  20   2   -9.89   19.14
 -13  20   2   48.63   22.31
 -12  20   2  -16.70   15.63
 -11  20   2   32.71   17.53
 -10  20   2  220.95   23.30
  -9  20   2  776.75   36.62
  -8  20   2   15.46   13.64
  -7  20   2  815.34   34.43
  -6  20   2   67.37   14.40
  -5  20   2  306.96   20.18
  -4  20   2   -8.61    7.90
  -3  20   2 1007.90   34.62
  -3  20   2 1142.06   39.59
  -2  20   2  112.59   12.24
  -2  20   2  129.60   16.82
  -1  20   2  352.48   19.94
  -1  20   2  308.66   17.89
   0  20   2   70.12   12.35
   0  20   2   85.75   13.28
   1  20   2  215.02   14.97
   1  20   2  249.35   17.99
   2  20   2  779.89   31.63
   2  20   2  811.02   27.50
   3  20   2  100.23   12.64
   3  20   2  109.83   16.48
   4  20   2  152.69   13.48
   4  20   2  178.04   17.61
   5  20   2  318.38   18.54
   5  20   2  303.16   22.87
   6  20   2    4.74   11.84
   6  20   2   12.83    9.36
   7  20   2   10.94   13.37
   8  20   2    6.11   13.41
   9  20   2  377.47   30.62
  10  20   2   85.43   23.06
  11  20   2  100.13   26.50
  12  20   2   -2.78   16.03
  13  20   2   78.67   26.41
  14  20   2  -32.97   18.43
  15  20   2   39.61   26.39
 -16  21   2   28.64   25.40
 -15  21   2  121.66   30.55
 -14  21   2   -9.54   18.39
 -13  21   2  186.04   30.26
 -12  21   2    1.32   16.83
 -11  21   2  469.59   31.41
 -10  21   2  107.59   21.47
  -9  21   2   59.20   18.04
  -8  21   2   -2.21   13.38
  -7  21   2   18.25   12.29
  -6  21   2   25.29   12.59
  -5  21   2  289.42   20.49
  -4  21   2   56.11   12.96
  -3  21   2 1294.82   40.90
  -3  21   2 1408.49   45.62
  -2  21   2  191.03   15.88
  -2  21   2  174.44   16.43
  -1  21   2  443.08   22.34
  -1  21   2  465.24   22.67
   0  21   2   40.63   11.63
   0  21   2   18.77    8.83
   1  21   2 1086.10   37.56
   1  21   2 1165.63   35.07
   2  21   2   92.08   13.00
   2  21   2   96.06   15.37
   3  21   2 1112.00   34.35
   3  21   2 1103.88   40.70
   4  21   2    3.58   10.08
   4  21   2    2.70    7.91
   5  21   2  196.55   15.58
   5  21   2  220.41   20.49
   6  21   2  105.19   20.04
   7  21   2   15.71   13.98
   8  21   2   80.18   20.59
   9  21   2  114.61   24.24
  10  21   2   -6.58   16.40
  11  21   2   34.34   20.87
  12  21   2   -3.95   16.13
  13  21   2   96.16   28.91
  14  21   2  -21.66   19.84
  15  21   2  106.11   31.19
 -16  22   2   52.78   29.22
 -15  22   2   13.73   18.69
 -14  22   2   23.18   22.08
 -13  22   2   44.58   22.01
 -12  22   2   37.13   19.33
 -11  22   2   13.15   16.04
 -10  22   2  215.39   22.99
  -9  22   2  207.14   26.47
  -8  22   2   45.62   16.83
  -7  22   2  214.92   20.06
  -6  22   2   40.57   13.69
  -5  22   2  175.75   20.24
  -4  22   2  502.38   24.97
  -3  22   2  468.79   26.02
  -3  22   2  425.38   23.11
  -2  22   2 1403.70   42.52
  -2  22   2 1415.74   45.25
  -1  22   2  337.08   19.79
  -1  22   2  383.27   21.22
   0  22   2   75.83   13.41
   0  22   2   64.49   12.12
   1  22   2  260.39   16.91
   1  22   2  286.61   20.00
   2  22   2  692.68   26.87
   2  22   2  692.47   31.18
   3  22   2   48.55   11.80
   3  22   2   57.96   13.58
   4  22   2  102.20   18.37
   4  22   2   98.65   14.51
   5  22   2  475.22   23.56
   5  22   2  469.25   29.24
   6  22   2  163.08   22.89
   7  22   2  413.64   29.96
   8  22   2  128.45   24.23
   9  22   2  279.72   27.96
  10  22   2   -5.49   16.77
  11  22   2  133.36   28.22
  12  22   2   14.82   18.78
  13  22   2    0.15   21.09
  14  22   2    4.02   22.53
  15  22   2   33.08   23.72
 -16  23   2  -10.96   27.25
 -15  23   2   -5.97   20.38
 -14  23   2  -35.25   15.89
 -13  23   2    3.21   19.11
 -12  23   2   95.97   23.16
 -11  23   2   -9.03   14.66
 -10  23   2  262.71   24.54
  -9  23   2    5.46   15.02
  -8  23   2   99.29   20.82
  -7  23   2   -5.11   12.50
  -6  23   2  867.16   35.99
  -5  23   2  -18.50    9.71
  -4  23   2  148.95   18.60
  -3  23   2   43.55   12.91
  -3  23   2   40.49   12.21
  -2  23   2  394.55   22.11
  -2  23   2  431.31   24.62
  -1  23   2  119.96   16.55
  -1  23   2  115.77   15.69
   0  23   2   19.55   10.02
   0  23   2   48.19   11.87
   1  23   2  257.20   19.09
   1  23   2  245.91   16.57
   2  23   2  668.00   31.63
   2  23   2  655.54   26.27
   3  23   2  149.19   14.31
   3  23   2  153.37   17.22
   4  23   2   19.51   12.58
   4  23   2   11.46    9.55
   5  23   2  348.12   26.21
   6  23   2  603.77   34.54
   7  23   2   25.77   15.07
   8  23   2  192.65   28.26
   9  23   2   56.11   20.27
  10  23   2  162.34   28.76
  11  23   2    7.49   19.09
  12  23   2  136.41   30.63
  13  23   2   17.29   22.26
  14  23   2  -20.97   22.35
  15  23   2   18.76   23.69
 -15  24   2   27.04   25.82
 -14  24   2   36.60   23.45
 -13  24   2   13.74   19.48
 -12  24   2   29.05   19.12
 -11  24   2    7.44   16.40
 -10  24   2  167.95   25.64
  -9  24   2  -27.97   13.09
  -8  24   2  -27.27   13.49
  -7  24   2   72.24   18.29
  -6  24   2   20.73   12.46
  -5  24   2   -2.08   11.59
  -4  24   2  139.32   18.45
  -4  24   2  149.02   21.35
  -3  24   2  112.39   16.21
  -3  24   2   82.63   16.07
  -2  24   2  439.63   23.62
  -2  24   2  421.64   24.52
  -1  24   2  109.34   16.10
  -1  24   2  120.99   16.61
   0  24   2  716.72   29.04
   0  24   2  705.38   30.50
   1  24   2   31.77   10.63
   1  24   2   47.71   13.28
   2  24   2  981.06   38.96
   2  24   2 1033.46   34.41
   3  24   2   99.98   17.77
   3  24   2  107.34   15.14
   4  24   2  751.89   36.35
   4  24   2  738.46   29.19
   5  24   2   55.31   15.69
   6  24   2   82.76   19.24
   7  24   2    9.61   13.88
   8  24   2   19.41   17.16
   9  24   2    7.31   15.25
  10  24   2   85.58   22.18
  11  24   2   42.53   21.60
  12  24   2  108.18   29.51
  13  24   2   12.09   19.93
  14  24   2   57.32   27.81
 -15  25   2   35.86   26.65
 -14  25   2   -8.31   20.19
 -13  25   2   11.18   18.53
 -12  25   2  126.93   25.93
 -11  25   2  169.85   26.99
 -10  25   2  147.16   24.86
  -9  25   2  -14.30   14.90
  -8  25   2  188.23   25.10
  -7  25   2  -18.96   12.85
  -6  25   2  126.21   19.98
  -5  25   2    9.66   12.35
  -4  25   2   -8.78    9.63
  -4  25   2   -3.55   10.71
  -3  25   2  463.90   27.39
  -3  25   2  484.01   25.30
  -2  25   2  194.47   16.91
  -2  25   2  166.47   17.04
  -1  25   2   27.33   11.72
  -1  25   2   52.88   12.98
   0  25   2   63.09   13.67
   0  25   2   68.08   13.22
   1  25   2  475.89   26.63
   1  25   2  514.93   24.60
   2  25   2   52.48   12.49
   2  25   2   31.50   12.59
   3  25   2  471.40   28.30
   3  25   2  477.45   23.48
   4  25   2  181.48   19.79
   4  25   2  191.72   15.79
   5  25   2   20.60   14.96
   6  25   2  136.95   23.37
   7  25   2   91.31   21.36
   8  25   2  345.11   31.23
   9  25   2   73.78   23.75
  10  25   2  273.07   29.91
  11  25   2   95.74   25.41
  12  25   2    9.85   21.36
  13  25   2   70.68   27.00
  14  25   2   28.00   25.20
 -15  26   2   32.30   25.28
 -14  26   2   40.74   21.81
 -13  26   2   58.76   22.27
 -12  26   2   16.05   19.21
 -11  26   2   60.29   21.41
 -10  26   2   -1.85   15.71
  -9  26   2   78.22   21.17
  -8  26   2   64.14   19.64
  -7  26   2  223.71   22.22
  -6  26   2  108.08   20.09
  -5  26   2  164.65   18.14
  -4  26   2    9.05   11.98
  -4  26   2    9.48   12.63
  -3  26   2  254.57   19.72
  -3  26   2  272.00   22.09
  -2  26   2   36.01   12.99
  -2  26   2   80.45   15.05
  -1  26   2  148.18   15.67
  -1  26   2  155.95   16.71
   0  26   2  333.40   22.24
   0  26   2  323.51   20.43
   1  26   2   38.75   11.55
   1  26   2   43.64   13.50
   2  26   2    2.45    9.49
   2  26   2    7.53   11.03
   3  26   2  161.69   15.35
   3  26   2  171.48   19.02
   4  26   2   46.09   16.55
   5  26   2  229.79   28.37
   6  26   2   30.15   16.31
   7  26   2  247.00   25.74
   8  26   2  135.35   26.22
   9  26   2  263.55   29.05
  10  26   2    4.02   19.96
  11  26   2  155.03   31.75
  12  26   2   -4.91   18.60
  13  26   2   21.99   24.12
  14  26   2    4.54   23.31
 -15  27   2  153.15   31.93
 -14  27   2    7.05   17.77
 -13  27   2   92.44   24.14
 -12  27   2  -16.44   16.95
 -11  27   2  -13.76   16.51
 -10  27   2    9.97   16.71
  -9  27   2    8.22   17.04
  -8  27   2  -10.66   14.25
  -7  27   2   -1.70   13.30
  -6  27   2   13.99   15.40
  -5  27   2   54.11   19.29
  -5  27   2   66.40   17.82
  -4  27   2   36.86   14.14
  -4  27   2   29.35   14.25
  -3  27   2  120.91   18.10
  -3  27   2  101.81   18.72
  -2  27   2   36.38   13.75
  -2  27   2   48.28   13.80
  -1  27   2  194.59   21.77
  -1  27   2  156.92   16.69
   0  27   2   55.50   13.32
   0  27   2   59.10   14.26
   1  27   2  705.99   34.25
   1  27   2  732.35   30.02
   2  27   2   23.80   13.62
   2  27   2    6.82    9.71
   3  27   2   87.89   14.90
   3  27   2   81.16   17.81
   4  27   2   10.80   13.85
   5  27   2  562.39   34.59
   6  27   2   55.59   19.89
   7  27   2   18.44   17.85
   8  27   2   82.13   22.73
   9  27   2   30.65   22.00
  10  27   2   38.14   20.80
  11  27   2   16.57   21.50
  12  27   2   58.63   26.56
  13  27   2  121.27   30.24
  14  27   2   42.82   28.77
 -14  28   2   29.23   22.31
 -13  28   2   12.85   18.45
 -12  28   2   -2.52   18.30
 -11  28   2  166.97   28.74
 -10  28   2   28.23   19.18
  -9  28   2  251.82   25.00
  -8  28   2   -7.58   15.69
  -7  28   2   38.63   18.27
  -6  28   2  -14.64   12.43
  -5  28   2  214.20   21.15
  -5  28   2  212.20   27.65
  -4  28   2   36.71   14.65
  -4  28   2   22.28   15.43
  -3  28   2   -5.60   10.00
  -3  28   2   22.95   13.59
  -2  28   2  248.56   20.11
  -2  28   2  206.48   19.56
  -1  28   2    6.60   11.07
  -1  28   2   12.73   11.12
   0  28   2  109.70   17.56
   0  28   2  144.14   19.98
   1  28   2   21.60   13.11
   1  28   2   34.51   11.84
   2  28   2  269.62   22.83
   2  28   2  291.35   20.15
   3  28   2   53.20   16.87
   4  28   2  300.33   25.78
   5  28   2   94.51   21.28
   6  28   2   52.02   19.07
   7  28   2   72.47   22.73
   8  28   2   22.56   18.33
   9  28   2   67.22   24.79
  10  28   2  119.17   28.87
  11  28   2   13.96   20.15
  12  28   2   43.26   25.00
  13  28   2   48.92   28.04
 -14  29   2  -13.39   22.06
 -13  29   2   41.64   21.51
 -12  29   2   65.01   23.55
 -11  29   2   16.80   18.16
 -10  29   2  240.04   30.95
  -9  29   2   88.48   22.54
  -8  29   2  115.23   22.71
  -7  29   2  139.56   23.20
  -6  29   2  302.67   24.94
  -6  29   2  298.81   28.21
  -5  29   2   98.64   20.07
  -5  29   2  107.40   22.68
  -4  29   2  351.56   27.72
  -4  29   2  297.41   23.89
  -3  29   2   47.41   16.16
  -3  29   2   69.13   16.86
  -2  29   2   15.34   12.66
  -2  29   2   28.08   13.15
  -1  29   2   66.52   15.72
  -1  29   2   62.03   16.25
   0  29   2   26.07   12.00
   1  29   2   18.80   13.82
   1  29   2    8.87   10.86
   2  29   2   22.01   14.56
   2  29   2   11.55   11.25
   3  29   2  -15.64   11.15
   4  29   2  298.18   26.15
   5  29   2   35.29   16.61
   6  29   2  263.62   31.49
   7  29   2    7.63   17.32
   8  29   2  292.00   30.08
   9  29   2   25.33   19.59
  10  29   2  176.69   31.97
  11  29   2  -18.75   18.30
  12  29   2   78.16   28.34
  13  29   2  -13.99   22.78
 -13  30   2   -6.03   20.51
 -12  30   2   94.09   24.70
 -11  30   2   -3.19   17.76
 -10  30   2    5.02   17.70
  -9  30   2    6.91   17.16
  -8  30   2   95.96   22.63
  -7  30   2  -22.61   13.25
  -6  30   2   91.08   20.73
  -6  30   2   82.50   22.74
  -5  30   2   15.63   14.74
  -5  30   2   13.23   15.77
  -4  30   2  265.58   30.82
  -4  30   2  258.38   22.43
  -3  30   2   72.67   17.71
  -3  30   2  100.56   20.20
  -2  30   2  108.69   19.75
  -2  30   2  131.65   20.62
  -1  30   2    2.91   11.80
  -1  30   2   -5.18   10.09
   0  30   2  920.74   40.39
   0  30   2  882.10   36.70
   1  30   2   27.43   15.96
   1  30   2    2.29   11.26
   2  30   2  178.51   24.87
   3  30   2    9.11   13.50
   4  30   2   90.40   21.69
   5  30   2  173.00   26.56
   6  30   2   50.70   20.66
   7  30   2  -35.08   12.00
   8  30   2   57.31   22.80
   9  30   2   81.24   26.89
  10  30   2   -6.84   19.62
  11  30   2    5.50   19.80
  12  30   2   37.81   25.00
  13  30   2  -15.97   23.25
 -12  31   2   32.55   21.48
 -11  31   2    7.70   17.95
 -10  31   2   65.30   21.67
  -9  31   2   66.69   21.18
  -8  31   2  232.72   24.98
  -7  31   2    7.22   16.76
  -7  31   2   -8.54   16.48
  -6  31   2  168.62   26.08
  -6  31   2  142.10   26.44
  -5  31   2   69.62   18.54
  -5  31   2   34.97   17.70
  -4  31   2  144.50   22.28
  -4  31   2  144.94   24.82
  -3  31   2   -5.83   12.74
  -3  31   2  -12.31   11.50
  -2  31   2    9.10   12.69
  -2  31   2   -3.81   12.71
  -1  31   2  248.41   22.97
  -1  31   2  243.94   21.96
   0  31   2  134.60   20.24
   0  31   2  144.25   22.32
   1  31   2  314.07   25.84
   1  31   2  328.28   22.04
   2  31   2   -3.64   13.37
   3  31   2   69.46   18.33
   4  31   2  144.25   23.81
   5  31   2  265.33   26.69
   6  31   2   27.44   19.44
   7  31   2   -6.64   16.64
   8  31   2   -2.52   16.90
   9  31   2   -4.82   17.94
  10  31   2   44.11   25.28
  11  31   2    7.72   22.57
  12  31   2   -4.48   22.93
 -12  32   2   56.22   23.43
 -11  32   2   62.72   23.83
 -10  32   2   -3.02   16.64
  -9  32   2  261.07   31.98
  -8  32   2   65.60   21.40
  -7  32   2  277.74   35.77
  -7  32   2  242.26   24.84
  -6  32   2   54.15   20.78
  -6  32   2   27.31   17.59
  -5  32   2  342.54   26.77
  -5  32   2  394.89   32.28
  -4  32   2  286.76   25.23
  -4  32   2  264.83   25.57
  -3  32   2   -1.14   12.91
  -3  32   2   18.87   15.62
  -2  32   2  -17.30   11.79
  -2  32   2  -13.10   11.95
  -1  32   2   38.00   16.08
  -1  32   2   42.12   15.96
   0  32   2   31.14   15.40
   0  32   2   17.89   13.33
   1  32   2   37.00   18.04
   2  32   2   -3.77   14.80
   3  32   2  105.43   21.71
   4  32   2   47.10   19.96
   5  32   2  202.58   29.83
   6  32   2  -26.78   14.11
   7  32   2   66.62   23.51
   8  32   2   14.69   20.07
   9  32   2   69.66   25.77
  10  32   2   13.18   21.98
  11  32   2   32.13   24.42
  12  32   2  -28.23   20.16
 -11  33   2   24.95   21.07
 -10  33   2   46.88   22.14
  -9  33   2   68.86   21.51
  -8  33   2   11.89   20.23
  -8  33   2   18.11   19.53
  -7  33   2   97.36   25.76
  -7  33   2  119.36   24.34
  -6  33   2   70.17   21.74
  -6  33   2   58.95   21.72
  -5  33   2  171.84   28.78
  -5  33   2  184.37   26.49
  -4  33   2  134.82   24.44
  -4  33   2  129.58   22.63
  -3  33   2  199.29   25.51
  -3  33   2  167.93   25.59
  -2  33   2   13.96   15.49
  -2  33   2    2.70   14.33
  -1  33   2  211.13   22.29
  -1  33   2  227.65   26.60
   0  33   2  109.22   21.60
   0  33   2   88.36   17.63
   1  33   2   67.80   19.66
   2  33   2   12.04   15.61
   3  33   2   46.84   18.55
   4  33   2   28.09   18.81
   5  33   2   -0.10   17.06
   6  33   2    3.50   16.62
   7  33   2  -16.77   17.50
   8  33   2    4.45   20.87
   9  33   2   -8.78   20.43
  10  33   2   22.51   23.09
  11  33   2    8.15   25.56
  12  33   2  -19.96   23.50
 -11  34   2  123.29   27.29
 -10  34   2   30.57   20.93
  -9  34   2  103.29   24.44
  -9  34   2   58.75   25.45
  -8  34   2   18.01   20.40
  -8  34   2   10.02   17.07
  -7  34   2   87.53   23.09
  -7  34   2   54.98   23.49
  -6  34   2   17.63   17.47
  -6  34   2   -5.27   16.42
  -5  34   2   40.65   19.14
  -5  34   2   29.33   19.14
  -4  34   2  124.81   24.48
  -4  34   2  158.33   24.70
  -3  34   2  -15.55   14.10
  -3  34   2   12.97   16.65
  -2  34   2   57.42   18.89
  -2  34   2   27.26   17.03
  -1  34   2   67.38   18.13
  -1  34   2   80.30   20.59
   0  34   2  298.35   27.18
   1  34   2   93.56   21.41
   2  34   2   24.06   17.54
   3  34   2    2.66   15.56
   4  34   2    4.64   16.10
   5  34   2   -7.94   16.81
   6  34   2   10.10   20.07
   7  34   2  257.64   35.92
   8  34   2   -3.45   19.87
   9  34   2  -17.21   19.49
  10  34   2  -30.82   19.51
  11  34   2   33.79   26.71
 -10  35   2   17.81   19.43
 -10  35   2   42.19   25.66
  -9  35   2   28.01   20.40
  -9  35   2   11.23   22.35
  -8  35   2  279.06   37.88
  -8  35   2  250.19   27.00
  -7  35   2   41.15   20.43
  -7  35   2   12.64   19.24
  -6  35   2  133.73   27.84
  -6  35   2  156.85   26.89
  -5  35   2    6.14   16.53
  -5  35   2  -14.11   13.84
  -4  35   2  131.86   23.62
  -4  35   2  121.60   24.85
  -3  35   2   44.26   18.96
  -3  35   2   63.48   21.36
  -2  35   2   52.83   19.87
  -2  35   2   93.34   22.42
  -1  35   2   13.00   14.93
  -1  35   2    8.93   17.25
   0  35   2   33.66   17.90
   1  35   2  -13.28   15.29
   2  35   2   10.37   18.13
   3  35   2   84.69   22.91
   4  35   2   56.78   22.07
   5  35   2   -1.30   17.95
   6  35   2  152.59   28.95
   7  35   2   -8.47   17.79
   8  35   2   48.08   22.85
   9  35   2  -23.66   21.44
  10  35   2   51.87   26.03
  11  35   2    0.75   26.14
 -11  36   2   11.72   25.25
 -10  36   2  -27.79   20.56
  -9  36   2    6.30   18.82
  -9  36   2   -4.23   21.34
  -8  36   2   59.49   24.70
  -8  36   2   37.67   20.88
  -7  36   2   20.02   20.43
  -7  36   2   48.83   20.13
  -6  36   2   11.92   17.03
  -6  36   2    5.22   17.25
  -5  36   2   46.14   20.79
  -5  36   2   63.97   22.04
  -4  36   2  233.61   25.26
  -3  36   2   37.97   19.26
  -3  36   2   57.72   20.74
  -2  36   2   35.87   18.99
  -2  36   2   43.22   19.41
  -1  36   2  -11.04   14.03
   0  36   2   78.58   21.78
   1  36   2  -23.44   12.59
   2  36   2  219.41   30.75
   3  36   2   40.10   20.62
   4  36   2   16.63   19.79
   5  36   2  -19.43   16.93
   6  36   2   47.77   21.60
   7  36   2    6.45   22.44
   8  36   2    4.99   21.60
   9  36   2  -23.45   18.87
  10  36   2    9.29   24.71
 -11  37   2    6.94   26.23
 -10  37   2    1.66   22.58
  -9  37   2  -13.01   17.91
  -9  37   2   13.15   22.30
  -8  37   2   42.69   22.69
  -8  37   2   25.10   19.87
  -7  37   2   -4.91   16.89
  -7  37   2   13.42   19.63
  -6  37   2   -9.76   16.32
  -6  37   2  -11.58   16.40
  -5  37   2  -12.66   17.57
  -5  37   2   11.55   17.70
  -4  37   2    0.87   17.08
  -4  37   2   19.90   18.21
  -3  37   2  120.45   23.84
  -3  37   2  102.89   23.31
  -2  37   2   67.16   21.67
  -2  37   2   48.10   18.98
  -1  37   2   84.74   22.85
   0  37   2  -13.68   16.20
   1  37   2   37.94   20.47
   2  37   2   11.20   16.94
   3  37   2   71.94   23.73
   4  37   2   30.57   20.85
   5  37   2   -0.28   19.01
   6  37   2   73.11   28.39
   7  37   2   22.12   24.31
   8  37   2   15.33   21.38
   9  37   2  -40.61   19.38
  10  37   2   10.40   25.68
 -10  38   2  -17.95   20.73
  -9  38   2   28.12   24.37
  -8  38   2   21.06   21.45
  -8  38   2    9.72   18.12
  -7  38   2   84.37   22.69
  -7  38   2   54.18   23.33
  -6  38   2  -19.32   16.23
  -6  38   2    4.77   17.91
  -5  38   2   23.76   20.59
  -5  38   2   21.54   18.95
  -4  38   2    3.08   17.40
  -4  38   2  -15.01   16.78
  -3  38   2    8.12   17.47
  -3  38   2   13.64   17.51
  -2  38   2   15.85   17.86
  -1  38   2  172.75   28.28
   0  38   2   -8.08   16.99
   1  38   2    6.96   18.42
   2  38   2   -6.83   18.56
   3  38   2   27.01   20.07
   4  38   2  -31.72   15.72
   5  38   2   12.13   22.05
   6  38   2    3.38   21.64
   7  38   2  268.07   40.48
   8  38   2   -4.88   20.37
   9  38   2   38.85   26.91
  -9  39   2   -6.47   21.00
  -8  39   2   28.09   24.13
  -7  39   2   37.51   23.30
  -7  39   2   62.34   22.95
  -6  39   2  -21.46   18.73
  -6  39   2  -17.61   16.63
  -5  39   2  -10.11   15.53
  -5  39   2  -18.06   16.06
  -4  39   2  -18.60   16.05
  -4  39   2   -9.94   16.85
  -3  39   2   74.63   22.17
  -2  39   2  115.45   25.20
  -1  39   2   73.50   22.61
   0  39   2    6.62   18.69
   1  39   2   47.82   21.91
   2  39   2   14.61   19.26
   3  39   2  188.25   33.25
   4  39   2   -1.28   20.50
   5  39   2    8.23   19.67
   6  39   2   37.44   23.65
   7  39   2   23.91   24.82
   8  39   2   -4.31   21.00
   9  39   2  -18.81   22.19
  -9  40   2   24.17   25.54
  -8  40   2  -16.74   18.78
  -7  40   2   -0.73   19.10
  -7  40   2   19.97   23.05
  -6  40   2  -23.86   16.52
  -6  40   2  -32.01   16.37
  -5  40   2    9.40   18.47
  -5  40   2    0.81   19.31
  -4  40   2    1.71   17.96
  -4  40   2    5.49   17.59
  -3  40   2   -1.82   16.36
  -2  40   2   44.19   21.50
  -1  40   2    5.32   19.09
   0  40   2   59.39   24.03
   1  40   2    9.24   18.39
   2  40   2  142.00   29.88
   3  40   2   31.99   22.07
   4  40   2    8.46   20.92
   5  40   2    1.88   22.06
   6  40   2   79.47   26.66
   7  40   2   28.65   23.43
   8  40   2   -0.04   21.20
  -8  41   2   78.64   26.59
  -7  41   2    2.77   21.46
  -6  41   2   34.56   21.76
  -6  41   2   28.28   22.35
  -5  41   2   27.41   20.35
  -5  41   2   -4.52   19.31
  -4  41   2   37.53   19.38
  -3  41   2  -23.08   15.79
  -2  41   2   -2.82   20.06
  -1  41   2   43.44   22.26
   0  41   2   -8.12   15.94
   1  41   2   -9.75   18.49
   2  41   2   15.69   20.56
   3  41   2   -9.64   17.42
   4  41   2   25.23   22.77
   5  41   2  -32.39   18.71
   6  41   2   99.14   29.52
   7  41   2   22.78   24.82
  -7  42   2   -7.96   18.92
  -6  42   2   28.49   21.59
  -5  42   2  -23.30   17.62
  -5  42   2   -6.05   18.20
  -4  42   2   86.09   23.67
  -3  42   2  -16.15   17.32
  -2  42   2   40.33   24.24
  -1  42   2   76.70   24.26
   0  42   2  116.95   26.32
   1  42   2  -17.12   17.96
   2  42   2    4.70   19.93
   3  42   2   -2.40   17.94
   4  42   2    7.95   21.49
   5  42   2  -10.68   18.92
   6  42   2   42.11   26.21
  -6  43   2   17.45   23.51
  -4  43   2   58.63   25.10
  -3  43   2    3.26   19.49
  -2  43   2    3.18   20.88
  -1  43   2   72.53   24.91
   0  43   2    3.76   17.54
   1  43   2    8.09   21.37
   2  43   2   10.77   20.56
   3  43   2  -11.54   19.47
   4  43   2   53.81   26.10
   5  43   2   16.24   21.87
  -3  44   2  -20.20   18.93
  -2  44   2  -21.92   18.27
  -1  44   2   45.84   24.35
   0  44   2   43.09   23.31
   1  44   2   24.30   22.15
   2  44   2  -26.59   18.50
   3  44   2   54.84   27.04
   4  44   2   -9.88   20.41
  -2  45   2    3.88   21.92
  -1  45   2  113.23   30.62
   0  45   2   25.85   23.88
   1  45   2   -3.25   21.87
   2  45   2  -21.77   21.88
   3  45  -3  -10.34   23.47
   2  45  -3  -14.12   22.58
   1  45  -3   72.20   29.50
   0  45  -3   17.24   22.51
  -1  45  -3  -16.36   20.35
   5  44  -3    5.60   23.64
   4  44  -3    1.52   24.84
   3  44  -3  -25.92   19.60
   2  44  -3   25.09   23.94
   1  44  -3    4.81   21.97
   0  44  -3   93.10   28.98
  -1  44  -3   -2.33   20.68
  -2  44  -3   20.92   23.67
  -3  44  -3    5.03   21.98
   6  43  -3    1.47   24.90
   5  43  -3    4.38   21.97
   4  43  -3  -29.16   21.98
   3  43  -3    1.59   22.41
   2  43  -3   -6.05   21.26
   1  43  -3   72.71   25.45
   0  43  -3   -1.33   21.59
  -1  43  -3   14.71   20.63
  -2  43  -3    0.83   19.63
  -3  43  -3  -11.21   20.64
  -4  43  -3    9.09   21.66
  -5  43  -3   16.70   22.97
   7  42  -3   -3.78   24.98
   6  42  -3    3.94   22.16
   5  42  -3   48.16   26.65
   4  42  -3  -29.16   19.77
   3  42  -3  -12.68   20.59
   2  42  -3   -7.93   19.80
   1  42  -3  -10.09   18.75
   0  42  -3   -8.87   20.63
  -1  42  -3   -8.24   17.87
  -2  42  -3   40.43   23.32
  -3  42  -3   20.00   21.01
  -4  42  -3    5.48   18.68
  -5  42  -3   42.38   23.60
  -6  42  -3   -8.48   21.70
   8  41  -3  -14.44   23.78
   7  41  -3  -18.24   21.34
   6  41  -3  -26.52   18.06
   5  41  -3   -6.17   18.72
   4  41  -3   26.03   23.98
   3  41  -3   34.46   20.97
   2  41  -3    0.32   19.28
   1  41  -3  116.20   29.19
   0  41  -3  -14.16   19.01
  -1  41  -3   53.50   23.76
  -2  41  -3  -20.64   17.68
  -3  41  -3   68.42   23.45
  -4  41  -3   38.77   20.87
  -5  41  -3   39.44   21.31
  -6  41  -3   24.31   20.88
  -7  41  -3   24.73   23.84
   9  40  -3   -9.86   26.11
   8  40  -3   -8.25   23.40
   7  40  -3    9.33   23.87
   6  40  -3    9.97   22.15
   5  40  -3   -0.34   20.95
   4  40  -3  -28.99   17.88
   3  40  -3  -13.58   18.75
   2  40  -3   24.82   22.02
   1  40  -3   27.28   22.50
   0  40  -3   -2.40   19.92
  -1  40  -3  -14.53   18.57
  -2  40  -3    6.54   19.57
  -3  40  -3    1.16   19.80
  -4  40  -3  -20.75   17.36
  -5  40  -3   -7.18   20.09
  -6  40  -3   59.29   23.19
  -7  40  -3  182.59   32.49
  -8  40  -3  -31.70   18.85
   9  39  -3  -37.58   21.89
   8  39  -3   61.22   28.73
   7  39  -3    0.43   22.71
   6  39  -3  -10.01   19.19
   5  39  -3  -31.78   16.27
   4  39  -3  -10.10   19.58
   3  39  -3   -8.37   16.81
   2  39  -3   36.76   21.22
   1  39  -3   10.16   18.63
   0  39  -3  -11.00   16.40
  -1  39  -3   -4.19   15.77
  -2  39  -3   52.77   22.85
  -3  39  -3   61.34   21.63
  -4  39  -3  -31.18   16.74
  -5  39  -3    3.25   19.85
  -6  39  -3  112.08   27.21
  -7  39  -3   12.13   19.01
  -8  39  -3   37.17   25.67
  10  38  -3  -43.11   23.45
   9  38  -3    6.21   23.18
   8  38  -3   61.79   26.15
   7  38  -3  -10.91   19.39
   6  38  -3  -22.98   16.73
   5  38  -3  -14.78   17.74
   4  38  -3  102.95   27.38
   3  38  -3  -17.91   16.97
   2  38  -3   21.97   18.94
   1  38  -3  -13.67   15.96
   0  38  -3   -2.25   18.83
  -1  38  -3   -2.25   16.68
  -2  38  -3  189.63   29.85
  -3  38  -3   16.76   19.49
  -4  38  -3   35.66   20.96
  -5  38  -3  -23.19   15.93
  -6  38  -3   75.39   23.97
  -7  38  -3  -15.84   20.24
  -8  38  -3  -17.04   18.27
  -9  38  -3   24.88   23.04
  11  37  -3  -18.11   22.58
  10  37  -3  -19.38   20.40
   9  37  -3   -5.80   22.15
   8  37  -3   88.14   27.04
   7  37  -3   -6.45   18.48
   6  37  -3   36.32   22.61
   5  37  -3   -5.03   19.39
   4  37  -3   -0.76   16.79
   3  37  -3    2.62   17.73
   2  37  -3  107.27   25.90
   1  37  -3    4.29   17.70
   0  37  -3  -12.15   15.65
  -1  37  -3    6.12   16.63
  -2  37  -3   36.32   19.62
  -3  37  -3  216.54   30.72
  -4  37  -3   -2.88   18.58
  -5  37  -3   20.04   18.59
  -6  37  -3  156.09   29.04
  -7  37  -3   53.75   22.46
  -8  37  -3   27.86   24.60
  -9  37  -3  -46.80   18.77
  11  36  -3   57.68   31.87
  10  36  -3   -7.56   21.78
   9  36  -3   90.78   29.15
   8  36  -3   -5.64   18.26
   7  36  -3    6.81   21.88
   6  36  -3  -11.21   18.20
   5  36  -3  124.70   28.25
   4  36  -3    8.80   18.77
   3  36  -3   24.46   19.89
   2  36  -3   60.73   21.55
   1  36  -3  140.73   27.12
   0  36  -3  107.39   25.00
  -1  36  -3   -0.33   16.12
  -2  36  -3   16.31   16.91
  -3  36  -3   52.77   20.78
  -4  36  -3    2.72   16.79
  -5  36  -3  -14.07   17.46
  -6  36  -3   19.31   20.38
  -7  36  -3  311.22   31.35
  -8  36  -3   22.04   20.89
  -9  36  -3   54.33   23.83
 -10  36  -3    0.80   20.45
  11  35  -3   19.48   25.50
  10  35  -3  -23.14   21.37
   9  35  -3   -5.81   20.92
   8  35  -3    0.37   19.85
   7  35  -3   22.84   22.01
   6  35  -3   -9.78   18.11
   5  35  -3   53.37   22.08
   4  35  -3   31.95   20.91
   3  35  -3  181.53   30.81
   2  35  -3   61.23   22.82
   1  35  -3  342.59   29.92
   0  35  -3   27.48   18.77
  -1  35  -3   44.40   19.54
  -2  35  -3   97.96   23.32
  -3  35  -3  252.06   26.37
  -4  35  -3   18.96   19.54
  -5  35  -3  -19.56   14.71
  -6  35  -3   33.17   21.03
  -7  35  -3   32.03   21.01
  -8  35  -3   -8.97   19.65
  -9  35  -3  -17.05   20.28
 -10  35  -3   49.89   26.51
  12  34  -3   30.51   28.28
  11  34  -3   -1.42   24.72
  10  34  -3  -33.02   21.36
   9  34  -3   81.08   28.42
   8  34  -3   35.60   21.78
   7  34  -3  126.91   29.21
   6  34  -3    5.24   17.88
   5  34  -3  197.70   31.94
   4  34  -3  184.16   29.03
   3  34  -3   86.94   24.33
   2  34  -3   48.20   20.49
   1  34  -3   37.31   17.25
   0  34  -3   -3.26   15.38
  -1  34  -3   55.88   19.55
  -2  34  -3  234.11   29.05
  -3  34  -3  203.07   27.54
  -4  34  -3   10.07   16.95
  -5  34  -3   88.32   24.83
  -6  34  -3   29.56   21.23
  -7  34  -3   15.79   19.51
  -8  34  -3   -4.90   17.31
  -9  34  -3   34.33   21.02
 -10  34  -3   -7.41   18.58
 -11  34  -3  -20.28   21.00
  12  33  -3   45.50   29.15
  11  33  -3   -2.79   24.08
  10  33  -3   35.86   25.71
   9  33  -3   12.83   22.97
   8  33  -3  177.24   34.01
   7  33  -3  -18.24   17.84
   6  33  -3  211.72   30.55
   5  33  -3   77.09   24.39
   4  33  -3  151.97   27.65
   3  33  -3   -9.45   15.70
   2  33  -3  198.49   28.31
   1  33  -3  185.24   27.43
   0  33  -3  150.19   24.63
  -1  33  -3  162.83   25.23
  -2  33  -3   32.23   17.58
  -3  33  -3  122.30   23.34
  -4  33  -3  114.89   23.16
  -5  33  -3   10.35   18.26
  -6  33  -3  112.16   25.78
  -7  33  -3  -13.01   16.82
  -8  33  -3  104.06   26.82
  -9  33  -3   10.76   20.33
 -10  33  -3   72.59   26.89
 -11  33  -3  -27.75   19.53
  13  32  -3    0.53   26.21
  12  32  -3   55.46   28.05
  11  32  -3    4.28   21.88
  10  32  -3    6.49   21.71
   9  32  -3   -2.68   21.60
   8  32  -3   45.25   21.47
   7  32  -3  -31.24   15.32
   6  32  -3   71.57   21.80
   5  32  -3   59.67   21.65
   4  32  -3  230.79   26.19
   3  32  -3  -26.96   13.61
   2  32  -3  212.33   29.12
   1  32  -3   59.02   18.84
   0  32  -3  719.43   38.67
  -1  32  -3  -14.09   12.32
  -2  32  -3  138.56   23.88
  -3  32  -3   -1.00   14.75
  -4  32  -3   48.45   18.99
  -5  32  -3    8.90   15.27
  -6  32  -3  -17.70   16.28
  -7  32  -3   61.86   23.24
  -8  32  -3   86.98   24.24
  -9  32  -3  -17.70   17.86
 -10  32  -3   -4.31   18.49
 -11  32  -3  -17.27   17.86
 -12  32  -3   36.52   25.04
  13  31  -3   34.63   26.12
  12  31  -3   -2.22   21.80
  11  31  -3   -5.25   19.70
  10  31  -3  184.95   32.51
   9  31  -3   87.68   27.16
   8  31  -3   55.46   23.00
   7  31  -3    2.20   18.70
   6  31  -3  194.87   30.08
   5  31  -3  116.98   23.20
   4  31  -3   89.50   20.95
   3  31  -3  127.71   23.16
   2  31  -3   -0.02   14.09
   1  31  -3  201.74   22.29
   0  31  -3   57.04   17.32
  -1  31  -3   71.06   18.92
  -1  31  -3   64.93   16.92
  -2  31  -3   63.02   19.34
  -3  31  -3   82.07   20.36
  -4  31  -3  319.19   27.46
  -5  31  -3    0.61   16.70
  -6  31  -3   23.99   18.28
  -7  31  -3   46.75   20.38
  -8  31  -3   89.21   25.48
  -9  31  -3   20.29   19.22
 -10  31  -3   56.56   23.45
 -11  31  -3    2.30   22.37
 -12  31  -3    0.07   19.16
  14  30  -3   22.83   25.95
  13  30  -3    6.59   26.35
  12  30  -3  -32.54   20.06
  11  30  -3   88.76   29.54
  10  30  -3    7.40   20.21
   9  30  -3  238.88   34.95
   8  30  -3  -12.44   17.00
   7  30  -3  125.85   27.14
   6  30  -3   -8.78   13.99
   5  30  -3  409.56   32.39
   4  30  -3   19.44   16.91
   3  30  -3   39.28   17.98
   2  30  -3    6.25   15.50
   1  30  -3   34.34   15.28
   0  30  -3  159.03   19.43
  -1  30  -3   28.30   12.90
  -2  30  -3    0.66   13.82
  -3  30  -3  219.32   22.94
  -4  30  -3  160.52   25.32
  -5  30  -3  285.00   26.18
  -6  30  -3  -28.01   14.41
  -7  30  -3  160.67   27.75
  -8  30  -3    4.09   18.31
  -9  30  -3  115.99   27.34
 -10  30  -3   12.18   20.61
 -11  30  -3   20.14   20.86
 -12  30  -3   13.87   24.61
 -13  30  -3    3.80   25.63
  14  29  -3   27.48   27.33
  13  29  -3   83.21   30.59
  12  29  -3  -11.76   19.42
  11  29  -3   41.85   23.69
  10  29  -3   -5.07   18.82
   9  29  -3   38.05   21.26
   8  29  -3    3.05   18.65
   7  29  -3   -3.23   15.07
   6  29  -3    5.58   15.36
   5  29  -3  162.10   26.33
   4  29  -3   84.08   20.54
   3  29  -3  268.41   24.82
   2  29  -3   -8.02   12.78
   1  29  -3  239.37   23.03
   0  29  -3   38.65   15.11
   0  29  -3   35.34   12.73
  -1  29  -3  428.13   28.39
  -2  29  -3   68.33   18.06
  -3  29  -3   62.80   18.87
  -4  29  -3   96.26   21.19
  -5  29  -3  294.58   26.34
  -6  29  -3   -7.83   13.84
  -7  29  -3   15.43   17.39
  -8  29  -3  -17.95   14.85
  -9  29  -3   54.98   21.73
 -10  29  -3   -7.61   17.10
 -11  29  -3   18.64   20.18
 -12  29  -3   36.02   22.71
 -13  29  -3  107.16   30.56
  14  28  -3   45.69   25.84
  13  28  -3   39.45   25.98
  12  28  -3   42.42   25.25
  11  28  -3  120.42   30.55
  10  28  -3   31.83   17.17
   9  28  -3  116.81   27.08
   8  28  -3  -11.71   14.44
   7  28  -3  120.62   22.11
   6  28  -3   83.48   20.31
   5  28  -3   -7.69   13.63
   4  28  -3  205.73   22.73
   3  28  -3  109.65   20.48
   2  28  -3   81.26   18.93
   1  28  -3   19.03   13.60
   0  28  -3  281.83   19.65
   0  28  -3  272.98   23.07
  -1  28  -3   20.77   13.44
  -2  28  -3  102.73   19.51
  -3  28  -3  216.51   21.94
  -4  28  -3  152.72   23.89
  -5  28  -3  232.74   23.71
  -6  28  -3   32.56   17.94
  -7  28  -3   31.41   18.11
  -8  28  -3   21.29   19.43
  -9  28  -3  116.20   25.23
 -10  28  -3   -9.95   16.78
 -11  28  -3  103.33   27.65
 -12  28  -3   19.20   20.49
 -13  28  -3  -12.09   18.05
  15  27  -3   -0.53   26.32
  14  27  -3    5.76   24.18
  13  27  -3  -15.13   19.58
  12  27  -3   67.62   25.67
  11  27  -3   42.04   23.51
  10  27  -3  331.74   33.32
   9  27  -3   26.47   19.16
   8  27  -3  240.01   27.34
   7  27  -3   -3.89   14.76
   6  27  -3  239.60   25.32
   5  27  -3    1.43   13.50
   4  27  -3  161.96   23.85
   3  27  -3   70.37   17.78
   2  27  -3   26.93   13.83
   1  27  -3  124.69   19.54
   1  27  -3  122.44   15.99
   0  27  -3   22.26   12.91
   0  27  -3    9.02    9.27
  -1  27  -3  120.65   20.25
  -2  27  -3   63.86   17.48
  -3  27  -3  121.11   21.67
  -4  27  -3  184.30   24.58
  -5  27  -3  180.05   24.82
  -6  27  -3  210.74   27.62
  -7  27  -3   71.49   21.56
  -8  27  -3  277.44   27.53
  -9  27  -3   33.81   21.02
 -10  27  -3  296.72   36.42
 -11  27  -3   38.39   21.43
 -12  27  -3   81.07   27.16
 -13  27  -3   53.63   26.34
 -14  27  -3   -4.41   22.50
  15  26  -3   26.06   26.60
  14  26  -3  149.28   34.42
  13  26  -3  -14.12   19.90
  12  26  -3   39.62   23.79
  11  26  -3   39.32   23.59
  10  26  -3   28.58   18.66
   9  26  -3   64.40   23.24
   8  26  -3   -9.46   14.94
   7  26  -3    3.12   15.64
   6  26  -3  246.45   25.11
   5  26  -3  168.16   25.28
   4  26  -3   36.01   12.52
   3  26  -3   -0.72   10.66
   2  26  -3  155.49   21.61
   1  26  -3   -0.18   10.34
   1  26  -3   -6.83    7.59
   0  26  -3  189.40   19.19
  -1  26  -3   57.72   15.84
  -2  26  -3  758.01   35.79
  -3  26  -3   27.43   15.88
  -4  26  -3  158.44   23.19
  -5  26  -3   17.79   15.25
  -6  26  -3   77.82   19.21
  -7  26  -3   51.26   18.70
  -8  26  -3   11.97   14.88
  -9  26  -3   81.83   23.80
 -10  26  -3  -19.83   18.49
 -11  26  -3   10.12   18.31
 -12  26  -3  133.33   28.01
 -13  26  -3   48.94   23.32
 -14  26  -3   75.88   25.64
  15  25  -3   90.84   31.98
  14  25  -3   -3.49   21.85
  13  25  -3   74.79   25.18
  12  25  -3   41.50   21.95
  11  25  -3   34.30   21.23
  10  25  -3  103.04   26.60
   9  25  -3   10.80   16.37
   8  25  -3  214.91   26.67
   7  25  -3   56.40   18.62
   6  25  -3  294.19   26.42
   5  25  -3  206.23   26.37
   4  25  -3   60.84   15.72
   3  25  -3    5.68   10.65
   2  25  -3    9.64    7.24
   2  25  -3   19.80   12.41
   1  25  -3  243.31   20.70
   1  25  -3  239.58   16.41
   0  25  -3   -6.75   10.14
  -1  25  -3  359.58   24.35
  -2  25  -3  199.94   19.69
  -3  25  -3  183.91   19.80
  -4  25  -3   22.25   13.94
  -5  25  -3  402.06   27.95
  -6  25  -3  175.20   24.78
  -7  25  -3  116.41   21.91
  -8  25  -3   87.98   21.18
  -9  25  -3    4.74   15.88
 -10  25  -3   25.96   18.71
 -11  25  -3   60.79   22.52
 -12  25  -3   81.00   22.34
 -13  25  -3   62.02   23.66
 -14  25  -3  -20.38   22.69
  15  24  -3   -0.51   23.17
  14  24  -3   11.35   23.26
  13  24  -3  116.97   29.92
  12  24  -3   26.59   21.99
  11  24  -3  192.99   32.70
  10  24  -3    4.80   16.46
 -10 -24   3    4.00   12.58
   9  24  -3  280.11   29.09
   8  24  -3    6.84   15.56
   7  24  -3  421.03   31.41
   6  24  -3   83.56   19.04
   5  24  -3  180.76   23.56
   4  24  -3    2.74    9.92
   3  24  -3   66.32   16.08
   2  24  -3  281.58   21.82
   2  24  -3  254.45   15.28
   1  24  -3   68.36   15.87
   1  24  -3   80.95   12.65
   0  24  -3    9.09   11.79
  -1  24  -3  520.96   28.07
  -2  24  -3  198.42   19.70
  -3  24  -3   42.07   14.87
  -4  24  -3   25.04   14.42
  -5  24  -3  941.63   40.88
  -6  24  -3  192.48   25.52
  -7  24  -3  362.86   27.57
  -8  24  -3   85.60   21.30
  -9  24  -3  220.07   28.35
 -10  24  -3   13.41   16.97
 -11  24  -3  267.05   28.90
 -12  24  -3   12.26   20.23
 -13  24  -3   -7.05   20.98
 -14  24  -3   -0.44   22.06
  16  23  -3    4.75   25.69
  15  23  -3   60.85   27.43
  14  23  -3  -17.49   20.35
  13  23  -3   74.91   26.24
  12  23  -3   19.06   20.95
  11  23  -3  476.34   38.16
  10  23  -3   25.42   18.64
 -10 -23   3   21.40   14.32
   9  23  -3  105.70   23.97
  -9 -23   3  137.39   21.03
  -8 -23   3  176.81   22.31
   8  23  -3  103.15   22.68
   6  23  -3   30.43   14.03
   5  23  -3   98.53   18.84
   4  23  -3   20.46   11.86
   3  23  -3  774.31   35.63
   2  23  -3   10.03    7.31
   2  23  -3   18.40   11.17
   1  23  -3  297.55   21.32
   1  23  -3  301.12   16.80
   0  23  -3   62.84   15.04
  -1  23  -3  911.37   36.51
  -2  23  -3   52.91   14.31
  -3  23  -3  456.65   26.94
  -4  23  -3    2.58   12.51
  -5  23  -3  136.47   21.05
  -6  23  -3  154.97   23.45
  -7  23  -3   57.87   18.06
  -8  23  -3  177.17   25.98
  -9  23  -3    7.72   14.73
 -10  23  -3   40.80   19.03
 -11  23  -3   71.09   23.83
 -12  23  -3   24.84   21.72
 -13  23  -3   65.66   26.71
 -14  23  -3  -32.04   16.49
 -15  23  -3   53.40   27.68
  16  22  -3  163.37   36.37
  15  22  -3    1.98   22.32
  14  22  -3   56.73   27.63
  13  22  -3   23.48   21.43
  12  22  -3   67.95   23.63
  11  22  -3   85.17   23.84
  10  22  -3  118.02   26.35
 -10 -22   3  157.34   21.38
  -9 -22   3   53.76   16.14
   9  22  -3   32.25   18.78
  -8 -22   3  244.01   21.20
   8  22  -3  268.85   26.24
   7  22  -3  447.69   31.00
  -7 -22   3  445.14   26.40
  -6 -22   3   90.38   16.01
   6  22  -3   92.25   18.58
   5  22  -3  159.29   22.06
   4  22  -3   25.30   10.65
   3  22  -3  563.02   20.32
   3  22  -3  597.12   30.56
   2  22  -3  371.62   23.85
   2  22  -3  375.24   17.15
   1  22  -3  -11.63    8.94
   0  22  -3  362.02   22.97
  -1  22  -3  544.88   27.82
  -2  22  -3  830.56   34.86
  -3  22  -3  116.63   17.65
  -4  22  -3  203.45   19.43
  -5  22  -3  760.02   35.83
  -6  22  -3   20.51   15.06
  -7  22  -3   61.20   18.52
  -8  22  -3   11.59   15.02
  -9  22  -3   -7.16   13.35
 -10  22  -3  109.42   24.45
 -11  22  -3    7.00   18.35
 -12  22  -3  147.18   30.12
 -13  22  -3   -1.53   17.18
 -14  22  -3   14.47   26.76
 -15  22  -3    8.29   24.48
  16  21  -3   46.67   25.06
  15  21  -3   -1.48   23.62
  14  21  -3   17.03   21.20
  13  21  -3   -5.20   16.82
  12  21  -3   57.25   21.18
  11  21  -3    4.90   15.72
 -10 -21   3  766.64   34.49
  10  21  -3  697.56   42.91
  -9 -21   3   17.73   13.41
   9  21  -3  -13.82   14.15
  -8 -21   3  350.72   23.64
   8  21  -3  312.89   27.64
  -7 -21   3   76.53   14.96
   7  21  -3   89.26   18.37
   6  21  -3 1260.85   49.00
  -6 -21   3 1183.83   42.22
  -5 -21   3  -13.77    7.50
   5  21  -3   10.11   10.88
   4  21  -3  178.29   18.32
   3  21  -3  277.03   13.73
   3  21  -3  301.37   21.94
   2  21  -3  310.76   15.33
   2  21  -3  304.02   21.09
   1  21  -3    2.78    9.26
   0  21  -3  141.79   15.59
  -1  21  -3  170.07   17.08
  -2  21  -3 1116.52   40.11
  -3  21  -3   36.91   13.35
  -4  21  -3  259.66   19.77
  -5  21  -3  175.17   19.19
  -6  21  -3  766.07   36.61
  -7  21  -3   63.35   18.32
  -8  21  -3  285.52   25.36
  -9  21  -3   -9.80   13.71
 -10  21  -3   -5.01   16.64
 -11  21  -3   32.49   17.49
 -12  21  -3  153.11   26.91
 -13  21  -3  -26.01   18.12
 -14  21  -3  -29.23   20.67
 -15  21  -3   23.37   30.96
  16  20  -3   59.34   27.58
  15  20  -3    6.55   23.67
  14  20  -3  112.77   29.48
  13  20  -3   48.79   21.36
  12  20  -3  152.59   26.64
  11  20  -3   15.68   16.89
 -10 -20   3  389.87   24.93
  10  20  -3  341.84   31.41
   9  20  -3  114.02   23.25
  -9 -20   3  174.63   21.31
   8  20  -3   38.93   16.32
  -8 -20   3   30.21   13.70
  -7 -20   3  440.10   25.03
   7  20  -3  386.02   27.93
  -6 -20   3  108.62   16.23
   6  20  -3  111.57   19.34
   5  20  -3   -8.64    9.21
  -5 -20   3  -11.01    7.93
   4  20  -3  212.30   19.10
   3  20  -3   74.39   14.34
   2  20  -3 1995.24   56.40
   2  20  -3 1943.81   44.02
   1  20  -3  160.82   15.58
   0  20  -3 1406.69   44.22
  -1  20  -3  675.76   29.79
  -2  20  -3  976.20   36.51
  -3  20  -3   12.38   11.65
  -4  20  -3  159.40   16.87
  -5  20  -3  434.93   26.64
  -6  20  -3  297.24   23.58
  -7  20  -3   54.89   16.97
  -8  20  -3   -3.54   13.86
  -9  20  -3   33.53   16.78
 -10  20  -3   67.33   20.94
 -11  20  -3   80.28   21.85
 -12  20  -3  103.37   24.12
 -13  20  -3  -21.22   19.71
 -14  20  -3  -13.15   15.65
 -15  20  -3    6.49   20.98
  17  19  -3   44.77   29.57
  16  19  -3    4.86   23.22
  15  19  -3    2.49   20.48
  14  19  -3  -12.54   18.77
  13  19  -3  109.83   26.40
  12  19  -3   -9.65   15.03
  11  19  -3  482.50   36.26
  10  19  -3  241.19   31.48
 -10 -19   3  193.77   18.41
  -9 -19   3   14.59   12.91
   9  19  -3   15.89   15.27
  -8 -19   3  137.31   18.40
   8  19  -3  154.04   23.89
  -7 -19   3   36.91   12.64
   7  19  -3   26.48   13.82
   6  19  -3  289.88   23.27
  -6 -19   3  297.76   20.19
   5  19  -3   66.04   15.87
  -5 -19   3  122.70   16.12
  -4 -19   3  703.21   29.88
   4  19  -3  724.86   32.80
   4  19  -3  674.82   19.58
   3  19  -3 1365.98   45.38
   3  19  -3 1440.12   32.61
   2  19  -3    7.95    5.55
   1  19  -3  984.72   35.33
   0  19  -3   12.15    9.72
  -1  19  -3 1558.29   46.76
  -2  19  -3  445.28   23.79
  -3  19  -3  178.69   16.97
  -4  19  -3  441.21   24.47
  -5  19  -3   23.00   12.54
  -6  19  -3   43.21   14.57
  -7  19  -3  -15.12    9.92
  -8  19  -3  275.59   24.60
  -9  19  -3  117.00   21.92
 -10  19  -3   -6.15   14.22
 -11  19  -3   99.56   23.66
 -12  19  -3    9.91   19.55
 -13  19  -3   21.38   22.88
 -14  19  -3   -2.85   24.30
 -15  19  -3  120.13   36.23
  17  18  -3   -4.39   21.32
  16  18  -3  -14.25   21.61
  15  18  -3   -2.88   19.62
  14  18  -3   19.48   20.41
  13  18  -3  106.76   26.37
  12  18  -3   -5.35   15.37
  11  18  -3  126.63   25.26
 -10 -18   3   48.86   14.64
  10  18  -3   53.24   19.92
   9  18  -3  645.86   37.46
  -9 -18   3  582.95   28.51
   8  18  -3    2.40   11.02
  -8 -18   3    5.62   10.38
  -7 -18   3 1209.85   40.94
   7  18  -3 1263.08   48.80
   6  18  -3   78.06   16.07
  -6 -18   3   89.17   14.44
   5  18  -3  488.60   27.37
  -5 -18   3  463.35   23.84
   4  18  -3    9.16    7.90
   4  18  -3    1.78    4.74
  -4 -18   3    4.90    8.19
  -3 -18   3 1341.08   42.51
   3  18  -3 1369.93   31.08
   3  18  -3 1394.40   44.66
   2  18  -3   11.28    8.87
   2  18  -3    3.62    5.62
   0  18  -3   37.14   10.67
  -1  18  -3  617.46   27.07
  -2  18  -3  246.09   17.95
  -3  18  -3  639.94   28.59
  -4  18  -3    1.29    9.29
  -5  18  -3 1582.57   50.03
  -6  18  -3  234.01   20.37
  -7  18  -3  182.48   19.85
  -8  18  -3   -9.79   11.78
  -9  18  -3  260.91   24.14
 -10  18  -3   37.73   18.31
 -11  18  -3   93.44   23.49
 -12  18  -3   -2.25   18.97
 -13  18  -3   39.83   22.10
 -14  18  -3   -5.78   23.46
 -15  18  -3  104.83   34.21
 -16  18  -3   10.47   29.58
  17  17  -3   29.91   24.77
  16  17  -3    0.09   21.80
  15  17  -3  117.78   30.92
  14  17  -3   -6.51   18.82
  13  17  -3   89.12   24.02
  12  17  -3    8.93   15.61
  11  17  -3  265.93   32.02
  10  17  -3  289.81   27.57
 -10 -17   3  335.72   22.22
  -9 -17   3    2.76   11.05
   9  17  -3    2.52   12.70
  -8 -17   3  259.76   19.05
   8  17  -3  237.22   22.68
  -7 -17   3   25.01   10.71
   7  17  -3   21.26   12.36
  -6 -17   3 1189.75   38.85
   6  17  -3 1093.03   42.90
   5  17  -3  327.79   22.36
  -5 -17   3  339.93   20.07
   4  17  -3  172.49   16.44
   4  17  -3  152.84    8.08
  -4 -17   3  162.20   14.39
   3  17  -3  575.74   26.73
  -3 -17   3  522.82   24.61
   3  17  -3  517.34   16.28
   1  17  -3  782.89   29.71
   0  17  -3  212.92   15.77
  -1  17  -3 1344.49   40.84
  -2  17  -3  638.64   27.21
  -3  17  -3    2.18    8.97
  -4  17  -3   79.41   14.77
  -5  17  -3  140.88   15.99
  -6  17  -3  197.05   19.15
  -7  17  -3  -11.35   10.47
  -8  17  -3    6.73   12.31
  -9  17  -3   22.62   14.01
 -10  17  -3   16.58   16.81
 -11  17  -3  -13.80   15.29
 -12  17  -3   94.50   25.33
 -13  17  -3  228.97   32.53
 -14  17  -3    1.87   20.74
 -15  17  -3   62.34   26.61
 -16  17  -3   18.64   27.06
  17  16  -3   -2.59   21.94
  16  16  -3    1.13   21.48
  15  16  -3   41.14   24.31
  14  16  -3  188.89   32.30
  13  16  -3  -13.93   14.42
  12  16  -3   49.39   20.74
  11  16  -3  209.48   29.08
 -10 -16   3  135.42   15.74
  10  16  -3  143.88   23.98
  -9 -16   3  129.40   17.39
   9  16  -3  102.14   20.88
   8  16  -3  183.51   20.17
  -8 -16   3  181.65   15.68
   7  16  -3   -4.27    9.66
  -7 -16   3   15.84    9.93
   6  16  -3  534.51   28.80
  -6 -16   3  545.36   24.99
  -5 -16   3   59.64   12.33
   5  16  -3   53.83   12.75
   4  16  -3   76.17    5.89
  -4 -16   3  105.91   14.18
   4  16  -3   92.74   13.53
   3  16  -3  132.95    8.05
   3  16  -3  142.22   14.54
  -3 -16   3  110.72   12.45
   2  16  -3 4084.46   87.88
  -2 -16   3 4039.79   88.05
   1  16  -3  107.19   12.20
   0  16  -3 3151.11   71.17
  -1  16  -3    7.83    8.16
  -2  16  -3  496.43   23.39
  -3  16  -3  -10.76    7.21
  -4  16  -3  660.11   28.88
  -5  16  -3    8.55   10.15
  -6  16  -3  425.96   25.56
  -7  16  -3   54.80   15.47
  -8  16  -3   32.02   15.27
  -9  16  -3  851.03   40.55
 -10  16  -3    5.55   15.54
 -11  16  -3    4.37   15.45
 -12  16  -3  244.80   33.12
 -13  16  -3   24.58   22.21
 -14  16  -3   -7.59   17.99
 -15  16  -3    5.73   27.87
 -16  16  -3   84.40   40.13
  17  15  -3    7.62   22.51
  16  15  -3   -3.70   20.30
  15  15  -3   37.71   22.60
  14  15  -3  102.47   25.00
  13  15  -3  -12.96   15.47
  12  15  -3   80.06   22.54
  11  15  -3  102.11   23.18
  10  15  -3 1101.38   49.12
 -10 -15   3 1141.79   39.72
   9  15  -3    1.72   11.14
  -9 -15   3   30.86   12.10
  -8 -15   3  358.86   20.97
   8  15  -3  349.62   25.47
   7  15  -3    8.33   10.36
  -7 -15   3   25.39   10.14
  -6 -15   3  632.57   26.87
   6  15  -3  651.05   31.08
   5  15  -3    4.54    8.02
  -5 -15   3    4.44    7.31
   4  15  -3  450.01   23.62
  -4 -15   3  466.30   22.02
   3  15  -3  491.84   23.54
  -3 -15   3  495.63   22.53
   3  15  -3  470.70   13.76
  -2 -15   3   25.07    9.24
   1  15  -3   80.88   12.12
   0  15  -3  583.06   24.19
  -1  15  -3  670.36   26.25
  -2  15  -3 1079.72   34.90
  -3  15  -3   -7.50    5.62
  -4  15  -3  292.71   18.99
  -5  15  -3  233.75   17.45
  -6  15  -3  277.01   19.68
  -7  15  -3   80.10   16.90
  -8  15  -3 1082.08   43.61
  -9  15  -3   50.26   17.89
 -10  15  -3  245.99   24.84
 -11  15  -3    1.73   15.56
 -12  15  -3  151.96   28.80
 -13  15  -3   22.23   23.13
 -14  15  -3   71.77   29.94
 -15  15  -3   55.43   31.90
 -16  15  -3   16.49   27.73
  17  14  -3   -1.38   21.08
  16  14  -3  167.25   32.94
  15  14  -3   13.66   19.79
  14  14  -3  337.71   33.06
  13  14  -3   70.32   22.40
  12  14  -3   56.59   20.52
  11  14  -3   28.16   17.13
 -10 -14   3   22.11   11.45
  10  14  -3   37.59   15.60
  -9 -14   3  490.22   24.80
   9  14  -3  526.21   31.78
  -8 -14   3   29.82   10.97
   8  14  -3   20.74   12.12
  -7 -14   3  286.30   17.93
   7  14  -3  265.78   21.30
  -6 -14   3  480.94   22.50
   6  14  -3  484.70   26.35
  -5 -14   3  332.11   18.39
   5  14  -3  317.00   19.73
   4  14  -3  545.70   25.36
  -4 -14   3  537.27   23.01
  -3 -14   3  171.37   13.67
   3  14  -3  190.05   14.69
   3  14  -3  187.96    7.85
  -2 -14   3  187.66   13.74
   2  14  -3  183.67   13.93
   1  14  -3  101.75   10.79
   0  14  -3 1288.20   37.34
  -1  14  -3  216.32   14.88
  -2  14  -3  645.65   25.12
  -3  14  -3  491.92   22.92
  -4  14  -3  847.55   31.66
  -5  14  -3  891.67   34.11
  -6  14  -3  340.81   22.49
  -7  14  -3  -15.31   10.16
  -8  14  -3   11.98   11.80
  -9  14  -3  202.09   25.62
 -10  14  -3    7.81   13.94
 -11  14  -3    6.97   15.25
 -12  14  -3  288.17   30.23
 -13  14  -3   31.02   23.60
 -14  14  -3  168.20   36.71
 -15  14  -3    0.18   25.47
 -16  14  -3  236.20   53.64
  18  13  -3   19.59   24.96
  17  13  -3   40.90   25.45
  16  13  -3   41.78   24.05
  15  13  -3  254.85   35.92
  14  13  -3   59.20   22.77
  13  13  -3  143.30   25.80
  12  13  -3  191.56   28.92
  11  13  -3  245.47   30.12
  10  13  -3   17.50   13.43
 -10 -13   3   35.10   12.63
  -9 -13   3  167.31   15.64
   9  13  -3  150.68   20.87
  -8 -13   3   76.30   13.24
   8  13  -3   57.95   14.92
   7  13  -3   15.48   10.39
  -7 -13   3   25.30    8.97
   6  13  -3   62.60   12.06
  -6 -13   3   58.75   11.33
   5  13  -3 1281.23   41.71
  -5 -13   3 1273.97   37.78
   4  13  -3  109.73   12.29
  -4 -13   3   92.83   10.46
  -3 -13   3  251.64   15.41
   3  13  -3  256.16   16.05
   3  13  -3  265.85    8.62
   2  13  -3   56.84    9.93
  -2 -13   3   62.56   10.15
   1  13  -3  212.75   13.71
  -1 -13   3  217.29   14.03
   0  13  -3  141.21   11.01
  -1  13  -3 1906.86   47.47
  -2  13  -3   90.33   12.40
  -3  13  -3   88.10   12.76
  -4  13  -3  165.20   14.88
  -5  13  -3  373.79   21.78
  -6  13  -3  320.72   21.31
  -7  13  -3   59.61   14.71
  -8  13  -3  321.57   24.07
  -9  13  -3   68.59   15.16
 -10  13  -3  353.24   28.19
 -11  13  -3   35.57   18.45
 -12  13  -3   55.39   21.89
 -13  13  -3  441.36   38.50
 -14  13  -3   66.77   29.35
 -15  13  -3   64.71   33.76
 -16  13  -3   -3.42   32.53
  18  12  -3   30.34   24.03
  17  12  -3   -0.97   19.58
  16  12  -3    0.48   19.32
  15  12  -3   59.85   21.79
  14  12  -3  128.99   27.04
  13  12  -3  170.82   28.02
  12  12  -3    4.39   14.75
  11  12  -3  393.59   30.47
  10  12  -3   74.41   18.32
 -10 -12   3   86.39   15.19
   9  12  -3  712.91   35.93
  -9 -12   3  745.05   29.78
   8  12  -3  101.69   17.78
  -8 -12   3  122.64   15.28
  -7 -12   3  613.89   25.46
   7  12  -3  603.38   29.80
   6  12  -3  176.05   16.02
  -6 -12   3  180.38   14.33
   5  12  -3  380.10   21.14
  -5 -12   3  370.54   18.68
   4  12  -3  581.52   24.95
  -4 -12   3  609.07   23.67
   3  12  -3  523.45   22.18
  -3 -12   3  497.97   20.86
   2  12  -3   22.54    6.93
  -2 -12   3   20.54    6.71
   1  12  -3   91.91    9.30
  -1 -12   3   85.60    9.26
   0  12  -3  683.81   24.10
  -1  12  -3  183.29   12.83
  -2  12  -3  224.58   13.83
  -3  12  -3  418.03   19.93
  -4  12  -3  305.14   18.47
  -5  12  -3 1112.01   37.63
  -6  12  -3  140.26   15.15
  -7  12  -3  478.21   26.95
  -8  12  -3   22.57   12.58
  -9  12  -3 1411.98   51.78
 -10  12  -3   17.26   16.81
 -11  12  -3  251.87   31.48
 -12  12  -3  175.72   29.87
 -13  12  -3   55.21   23.77
 -14  12  -3   22.55   22.64
 -15  12  -3   24.84   33.65
 -16  12  -3  -11.43   30.92
  18  11  -3   51.72   26.51
  17  11  -3  122.37   30.60
  16  11  -3   -7.22   18.55
  15  11  -3   71.86   24.00
  14  11  -3   17.10   16.75
  13  11  -3  185.22   28.37
  12  11  -3   41.66   18.78
 -11 -11   3    8.81   10.55
  11  11  -3  -14.64   13.20
 -10 -11   3 1078.97   37.26
  10  11  -3 1024.42   44.87
   9  11  -3    0.16    9.88
  -9 -11   3   11.57    9.35
  -8 -11   3   81.34   12.37
   8  11  -3   74.61   15.16
  -7 -11   3  106.13   13.94
   7  11  -3  102.95   16.26
  -6 -11   3   22.56    8.29
   6  11  -3   14.54    8.86
  -5 -11   3  766.18   26.91
   5  11  -3  749.97   29.54
   4  11  -3  359.42   18.98
  -4 -11   3  356.58   17.43
   3  11  -3  842.76   28.41
  -3 -11   3  859.29   27.58
   2  11  -3   39.79    7.72
  -2 -11   3   28.78    7.17
  -1 -11   3   63.45    9.23
   1  11  -3   35.88    7.48
   0  11  -3  384.51   16.64
  -1  11  -3  250.20   13.96
  -2  11  -3   64.42    9.75
  -3  11  -3 2538.20   58.85
  -4  11  -3 1479.04   42.17
  -5  11  -3    9.84    7.37
  -6  11  -3   -6.96    8.33
  -7  11  -3   66.89   15.31
  -8  11  -3  641.38   32.37
  -9  11  -3   30.04   15.03
 -10  11  -3   54.22   19.62
 -11  11  -3   11.16   13.72
 -12  11  -3   70.11   22.73
 -13  11  -3   67.22   23.47
 -14  11  -3   -0.37   26.10
 -15  11  -3  286.03   50.34
 -16  11  -3  109.26   49.07
 -17  11  -3  156.11   66.36
  18  10  -3   55.87   26.46
  17  10  -3   -5.75   19.50
  16  10  -3   75.78   24.07
  15  10  -3   -3.09   17.28
  14  10  -3  253.35   33.89
  13  10  -3   42.78   18.33
  12  10  -3  118.53   23.50
  11  10  -3    7.20   13.87
 -11 -10   3   36.91   12.57
 -10 -10   3   20.82   10.86
  10  10  -3   31.02   13.25
   9  10  -3   -4.25    9.09
  -9 -10   3    2.40    7.67
   8  10  -3    4.77    8.89
  -8 -10   3    6.16    7.62
  -7 -10   3  142.44   13.07
   7  10  -3  154.75   15.94
  -6 -10   3  409.12   19.47
   6  10  -3  373.48   21.60
   5  10  -3 1186.27   37.72
  -5 -10   3 1213.02   35.01
  -4 -10   3  208.97   13.12
   4  10  -3  206.09   14.08
   3  10  -3   75.90    9.97
  -3 -10   3   57.11    8.98
  -2 -10   3 1198.21   33.12
   2  10  -3 1229.71   33.07
  -1 -10   3   87.57    8.76
   1  10  -3   91.97    8.42
   0  10  -3    6.21    5.04
   0 -10   3    0.20    4.57
  -1  10  -3   51.46    8.55
  -2  10  -3 1505.93   38.71
  -3  10  -3   65.73    9.29
  -4  10  -3 1267.67   37.85
  -5  10  -3    6.69    8.29
  -6  10  -3  212.59   17.75
  -7  10  -3  759.86   32.91
  -8  10  -3    5.53   11.19
  -9  10  -3   18.34   12.89
 -10  10  -3   36.56   18.56
 -11  10  -3  149.85   27.07
 -12  10  -3  203.53   32.10
 -13  10  -3   79.33   27.04
 -14  10  -3   93.76   34.39
 -15  10  -3    6.83   30.73
 -16  10  -3  345.66   58.49
 -17  10  -3  112.95   59.86
  18   9  -3    2.19   21.98
  17   9  -3   12.65   19.33
  16   9  -3   -1.05   16.56
  15   9  -3   -3.56   17.34
  14   9  -3   61.84   20.99
  13   9  -3  135.25   24.47
  12   9  -3  294.36   27.58
 -11  -9   3   -3.98    9.53
  11   9  -3   -2.89   12.98
  10   9  -3  109.98   19.42
 -10  -9   3   89.04   14.43
   9   9  -3   -4.70    9.13
  -9  -9   3   10.57    8.08
   8   9  -3  265.97   20.55
  -8  -9   3  262.53   16.23
   7   9  -3    4.78    8.89
  -7  -9   3    8.55    6.83
  -6  -9   3 1335.05   37.87
   6   9  -3 1366.48   42.34
   5   9  -3    7.33    6.83
  -5  -9   3   14.69    6.64
  -4  -9   3 1202.10   33.60
   4   9  -3 1195.59   35.05
  -3  -9   3  162.13   11.17
   3   9  -3  183.26   11.89
  -2  -9   3   26.99    6.54
   1   9  -3   12.68    5.02
  -1  -9   3   13.47    5.45
   0   9  -3   17.27    5.72
   0  -9   3   14.51    5.67
  -1   9  -3  236.40   12.70
  -2   9  -3   24.74    6.90
  -3   9  -3   65.72    9.57
  -4   9  -3  204.49   14.65
  -5   9  -3  658.30   27.02
  -6   9  -3 2045.82   55.81
  -7   9  -3   33.81   11.75
  -8   9  -3  702.86   33.73
  -9   9  -3  -18.57   11.26
 -10   9  -3  262.86   25.15
 -11   9  -3  -12.94   15.57
 -12   9  -3  232.55   33.67
 -13   9  -3   37.20   25.98
 -14   9  -3   22.66   27.94
 -15   9  -3  -19.98   34.55
 -16   9  -3   67.54   51.24
 -17   9  -3  -31.27   61.20
  18   8  -3   45.07   23.72
  17   8  -3    4.12   19.20
  16   8  -3   50.58   22.98
  15   8  -3  -27.85   14.21
  14   8  -3  -11.99   14.30
  13   8  -3  101.37   23.02
  12   8  -3  265.11   25.91
 -11  -8   3  159.41   16.65
  11   8  -3  113.69   21.83
  10   8  -3  103.60   18.83
 -10  -8   3   95.71   14.38
   9   8  -3    9.18   10.70
  -9  -8   3   16.16    8.32
  -8  -8   3   87.75   12.31
   8   8  -3   59.69   13.56
   7   8  -3  188.87   16.38
  -7  -8   3  184.18   13.95
  -6  -8   3   13.17    6.44
   6   8  -3    3.74    7.24
   5   8  -3    7.51    6.51
  -5  -8   3   -1.90    4.93
  -4  -8   3  669.35   23.00
   4   8  -3  677.38   24.28
   3   8  -3  414.77   17.27
  -3  -8   3  411.50   16.94
  -2  -8   3 3276.74   67.65
   2   8  -3 3388.17   66.74
   1   8  -3  236.95   11.73
  -1  -8   3  225.98   11.90
   0   8  -3  592.05   19.34
   0  -8   3  573.89   19.37
  -1   8  -3   84.78    7.91
  -2   8  -3  761.72   24.09
  -3   8  -3  100.97    9.83
  -4   8  -3   -1.94    5.71
  -5   8  -3 1561.40   44.49
  -6   8  -3   89.58   14.65
  -7   8  -3  126.61   18.40
  -8   8  -3  225.43   20.60
  -9   8  -3  132.25   21.41
 -10   8  -3  196.02   27.30
 -11   8  -3  121.07   26.73
 -12   8  -3   -1.89   18.37
 -13   8  -3   11.74   25.25
 -14   8  -3   38.28   26.64
 -15   8  -3   -9.86   33.43
 -16   8  -3  274.87   66.68
 -17   8  -3   44.65   68.86
  18   7  -3  -27.58   17.36
  17   7  -3   88.09   26.95
  16   7  -3   -8.59   15.74
  15   7  -3   53.29   21.30
  14   7  -3  -12.26   13.77
  13   7  -3  141.58   24.50
  12   7  -3  276.93   25.83
 -11  -7   3  480.82   25.26
  11   7  -3  500.44   32.20
 -10  -7   3  451.45   23.14
  10   7  -3  428.79   27.90
   9   7  -3   -9.34    7.99
  -9  -7   3   -4.06    6.15
  -8  -7   3  534.84   23.42
   8   7  -3  599.92   28.78
  -7  -7   3   13.61    7.71
   7   7  -3    5.65    8.69
   6   7  -3  621.06   26.13
  -6  -7   3  640.37   23.75
  -5  -7   3    1.84    5.04
   5   7  -3    5.85    6.07
   4   7  -3  724.34   24.53
  -4  -7   3  680.45   22.89
   3   7  -3 1336.86   34.20
  -3  -7   3 1336.47   34.13
   2   7  -3    9.90    4.46
  -2  -7   3    3.37    4.22
   1   7  -3  856.87   23.21
  -1  -7   3  821.93   23.83
   0   7  -3 1109.50   28.35
   0  -7   3 1114.48   28.81
   0  -7   3 1184.57   26.53
  -1   7  -3 1611.38   37.01
   1  -7   3 1599.50   36.20
  -2   7  -3   -0.07    4.40
   2  -7   3   -0.39    5.22
   3  -7   3 1878.00   46.15
  -3   7  -3 1950.46   45.79
  -4   7  -3   -2.77    3.94
   4  -7   3   -6.63    6.26
  -5   7  -3   41.38   10.55
  -6   7  -3  420.23   22.80
  -7   7  -3  240.46   19.72
  -8   7  -3   -3.32   10.49
  -9   7  -3  -18.14   11.28
 -10   7  -3  176.24   26.38
 -11   7  -3   35.15   22.25
 -12   7  -3  -13.23   18.69
 -13   7  -3  -14.22   23.29
 -14   7  -3   57.35   35.29
 -15   7  -3  271.45   56.58
 -16   7  -3   68.37   53.75
 -17   7  -3  262.77   95.38
  18   6  -3  -17.46   19.03
  17   6  -3    5.52   18.69
  16   6  -3  -13.91   15.55
  15   6  -3    7.28   17.44
  14   6  -3   -2.03   13.37
  13   6  -3   13.86   13.71
  12   6  -3   71.27   19.61
 -11  -6   3  181.29   18.40
  11   6  -3  199.35   21.94
  10   6  -3  168.15   18.65
 -10  -6   3  181.93   15.73
  -9  -6   3  139.33   13.58
   9   6  -3  142.45   19.16
  -8  -6   3   -2.11    7.52
   8   6  -3   -2.93    7.77
  -7  -6   3 1111.38   34.21
   7   6  -3 1126.00   38.16
  -6  -6   3   31.23    7.64
   6   6  -3   27.04    8.54
  -5  -6   3  738.80   24.62
   5   6  -3  754.66   26.56
  -4  -6   3   17.08    5.56
   4   6  -3    4.64    4.82
  -3  -6   3   19.56    5.35
   3   6  -3   16.42    5.33
   2   6  -3  393.51   14.46
  -2  -6   3  367.65   14.78
   1   6  -3   42.73    6.32
  -1  -6   3   37.97    6.47
  -1  -6   3   41.66    4.73
   0  -6   3   43.07    6.76
   0   6  -3   45.20    5.93
   0  -6   3   50.27    6.47
  -1   6  -3  140.73    8.94
   1  -6   3  141.63    8.51
   1  -6   3  141.94    9.08
  -2   6  -3   -0.34    3.89
   2  -6   3    1.26    3.76
  -3   6  -3  305.29   15.16
   3  -6   3  276.17   15.22
   4  -6   3   18.91    8.35
  -4   6  -3   29.01    7.07
   5  -6   3   -4.00    7.12
  -5   6  -3    9.04    8.02
  -6   6  -3  718.43   29.58
   8  -6   3    2.18    9.79
   9  -6   3  133.41   20.25
  10  -6   3   19.55   14.17
  11  -6   3  469.19   32.11
 -14   6  -3   -7.86   32.55
 -15   6  -3   -0.76   48.94
 -16   6  -3  -40.84   59.31
 -17   6  -3  296.13  106.16
  18   5  -3   -3.90   18.91
  17   5  -3   30.64   20.48
  16   5  -3   14.03   17.82
  15   5  -3   11.35   17.29
  14   5  -3    0.63   14.71
  13   5  -3  -10.00   11.29
  12   5  -3   12.10   12.81
 -11  -5   3   61.46   15.76
  11   5  -3  102.41   19.91
  10   5  -3   13.72   11.85
 -10  -5   3   27.14   10.63
   9   5  -3  161.98   17.21
  -9  -5   3  198.04   15.66
   8   5  -3  231.73   18.65
  -8  -5   3  254.04   17.06
  -7  -5   3  229.36   14.78
   7   5  -3  228.41   16.94
  -6  -5   3  124.63   11.20
   6   5  -3  142.77   12.68
   5   5  -3  344.96   17.05
  -5  -5   3  336.17   15.84
  -4  -5   3   70.21    7.67
   4   5  -3   61.85    8.65
  -3  -5   3 1099.22   29.15
   3   5  -3 1125.12   28.75
  -2  -5   3   14.88    5.02
   2   5  -3   21.96    5.09
  -1  -5   3   53.16    5.96
   1   5  -3   49.34    5.19
   0  -5   3 1366.56   28.60
   0   5  -3 1332.62   30.24
   0  -5   3 1349.93   30.94
   1  -5   3  141.66    8.87
  -1   5  -3  139.80    8.82
   1  -5   3  150.54    8.49
  -2   5  -3  498.52   17.25
   2  -5   3  499.50   18.17
   3  -5   3  372.60   17.11
  -3   5  -3  383.24   16.19
  -4   5  -3  246.44   14.68
   4  -5   3  231.25   15.03
   5  -5   3  124.21   12.03
   6  -5   3  506.10   24.76
   6  -5   3  515.57   25.58
   7  -5   3  152.08   16.17
   8  -5   3   -2.36    8.85
   9  -5   3   -6.71    9.92
  10  -5   3   81.29   18.19
  11  -5   3  117.24   22.66
  12  -5   3  128.74   23.40
  13  -5   3   23.60   16.36
  14  -5   3   19.88   18.28
 -16   5  -3   75.29   65.48
 -17   5  -3  784.12  165.66
  18   4  -3   45.15   24.75
  17   4  -3  -12.26   15.56
  16   4  -3   38.83   21.28
  15   4  -3   59.97   21.51
  14   4  -3   -8.86   14.30
  13   4  -3   -8.85   12.33
  12   4  -3  415.89   30.67
 -11  -4   3  284.28   21.76
  11   4  -3  354.41   26.55
 -10  -4   3  150.85   15.00
  10   4  -3  153.15   17.45
  -9  -4   3  204.19   16.21
   9   4  -3  182.72   17.96
   8   4  -3  104.62   15.72
  -8  -4   3  118.35   15.36
   7   4  -3  261.55   17.45
  -7  -4   3  257.21   15.62
   6   4  -3   18.53    7.54
  -6  -4   3   24.14    7.90
   5   4  -3  109.81   10.11
  -5  -4   3   95.67    9.58
  -4  -4   3  609.20   20.75
   4   4  -3  583.41   20.24
  -3  -4   3   51.27    7.38
   3   4  -3   59.38    7.39
  -2  -4   3 2842.52   56.67
   2   4  -3 2768.45   53.61
  -1  -4   3   -1.48    2.68
   1   4  -3    7.46    3.12
   0   4  -3 1660.70   34.46
   0  -4   3 1632.81   32.76
   0  -4   3 1670.05   35.31
   1  -4   3 1916.03   39.37
   1  -4   3 1950.76   39.82
  -1   4  -3 1927.57   40.08
  -2   4  -3 1627.72   36.90
   2  -4   3 1564.85   36.85
   3  -4   3   53.96    9.18
  -3   4  -3   86.77    7.93
   4  -4   3   74.44   10.16
   4  -4   3   75.01   10.91
   5  -4   3 1422.46   41.72
   5  -4   3 1439.38   41.23
   6  -4   3   11.73    9.83
   6  -4   3   37.65    9.85
   7  -4   3  326.80   21.59
   7  -4   3  313.07   21.46
   8  -4   3    6.43    9.81
   9  -4   3  238.11   21.50
  10  -4   3   60.53   17.45
  11  -4   3   12.86   15.81
  12  -4   3    8.61   14.07
  13  -4   3  358.94   30.45
  14  -4   3  110.70   25.36
  15  -4   3    0.65   18.91
 -17   4  -3  -44.16  123.98
  18   3  -3    5.41   20.75
  17   3  -3   -1.10   18.14
  16   3  -3   48.19   21.90
  15   3  -3    5.41   16.08
  14   3  -3   47.25   19.38
  13   3  -3  -16.50   11.73
  12   3  -3  316.18   26.36
  11   3  -3 1291.44   49.85
 -11  -3   3 1278.73   44.01
 -10  -3   3    5.03    8.74
  10   3  -3    6.36   10.45
  -9  -3   3  199.76   16.10
   9   3  -3  193.05   17.77
  -8  -3   3 2372.07   58.75
   8   3  -3 2322.20   61.97
   7   3  -3  394.72   20.94
  -7  -3   3  382.78   19.08
  -6  -3   3  276.80   15.23
   6   3  -3  254.69   15.58
  -5  -3   3  416.82   17.97
   5   3  -3  397.17   17.65
   4   3  -3  444.23   16.98
  -4  -3   3  434.40   17.24
   3   3  -3 1299.71   30.45
  -3  -3   3 1314.62   32.54
   2   3  -3  215.64    8.94
  -2  -3   3  215.72   10.44
   1   3  -3  398.19   11.69
  -1  -3   3  380.16   13.02
   0   3  -3  300.54   10.05
   0  -3   3  283.01    9.62
   0  -3   3  288.34   10.34
   1  -3   3  926.78   22.97
   1  -3   3  927.36   21.40
  -1   3  -3  894.39   22.44
  -2   3  -3  713.53   21.09
   2  -3   3  721.54   21.64
   3  -3   3   -2.18    4.84
   3  -3   3   -6.38    3.83
   4  -3   3   -4.28    4.96
   4  -3   3   -2.01    4.85
   5  -3   3 1633.93   44.86
   5  -3   3 1635.00   44.95
   6  -3   3  485.10   24.71
   6  -3   3  511.09   24.96
   7  -3   3   -0.19    8.98
   7  -3   3    4.14    9.01
   8  -3   3  311.77   22.35
   8  -3   3  336.06   23.11
   9  -3   3   15.49   12.37
  10  -3   3  335.95   26.05
  11  -3   3   36.52   17.05
  12  -3   3  265.47   31.45
  13  -3   3  106.75   23.95
  14  -3   3  245.78   33.62
  15  -3   3    9.45   19.07
  16  -3   3   14.89   19.59
  18   2  -3   69.69   24.20
  17   2  -3    2.38   17.77
  16   2  -3  177.11   30.09
  15   2  -3    5.15   16.10
  14   2  -3  247.80   30.59
  13   2  -3   -5.87   13.05
  12   2  -3   59.79   17.61
  11   2  -3   15.41   13.24
 -11  -2   3   -6.73   13.58
 -10  -2   3  143.88   15.22
  10   2  -3  149.94   19.92
  -9  -2   3  124.09   13.85
   9   2  -3  146.07   18.47
   8   2  -3  268.78   18.98
  -8  -2   3  263.89   17.99
  -7  -2   3  138.01   12.07
   7   2  -3  140.74   13.25
  -6  -2   3   -3.70    4.54
   6   2  -3   -1.99    4.93
  -5  -2   3   45.09    7.93
   5   2  -3   64.32    9.43
  -4  -2   3 1636.99   39.66
   4   2  -3 1645.90   38.13
   3   2  -3 1164.62   27.06
  -3  -2   3 1116.04   29.18
  -3  -2   3 1109.25   22.56
  -2  -2   3    8.90    4.09
   2   2  -3   12.43    3.04
  -1  -2   3  170.82    8.18
   0   2  -3  233.47    8.14
   0  -2   3  240.58    8.87
   0  -2   3  236.36    8.51
   1  -2   3  748.00   19.61
  -1   2  -3  758.34   19.26
   1  -2   3  742.05   17.53
   2  -2   3 1178.66   28.94
   2  -2   3 1180.46   29.22
   3  -2   3   25.70    6.81
   3  -2   3   24.77    6.68
   4  -2   3  789.90   26.84
   4  -2   3  859.88   27.76
   5  -2   3   55.02    9.48
   5  -2   3   52.84   10.82
   6  -2   3 6068.79  122.55
   6  -2   3 6130.01  120.21
   7  -2   3  269.41   19.64
   7  -2   3  276.39   20.12
   8  -2   3   10.17   10.39
   8  -2   3   -4.54    9.50
   9  -2   3   45.67   14.37
  10  -2   3    4.06   11.10
  11  -2   3   24.21   15.03
  12  -2   3  200.99   28.54
  13  -2   3   95.00   23.31
  14  -2   3  398.31   34.32
  15  -2   3   -0.10   17.32
  16  -2   3    0.12   20.09
  17  -2   3  -11.54   18.73
  18   1  -3   11.04   21.95
  17   1  -3   64.80   24.78
  16   1  -3   47.12   21.01
  15   1  -3   76.08   21.63
  14   1  -3   95.49   22.69
  13   1  -3  133.81   23.67
  12   1  -3   37.05   15.73
  11   1  -3  417.66   28.18
 -11  -1   3  438.18   26.60
 -10  -1   3   21.62   10.90
  10   1  -3   19.78   11.82
  -9  -1   3   37.65   11.40
   9   1  -3   45.01   12.72
   8   1  -3  193.66   16.42
   7   1  -3  100.73   11.45
   6   1  -3    5.41    6.09
   5   1  -3   12.53    5.83
   4   1  -3  125.93    8.97
   3   1  -3 2535.67   48.44
  -3  -1   3 2387.14   44.26
  -1  -1   3  365.94   10.03
  -1  -1   3  370.11   12.33
   0  -1   3  578.98   14.91
   0  -1   3  548.87   14.34
   1  -1   3  373.37   12.65
   2  -1   3 2405.90   48.66
   2  -1   3 2404.74   49.24
   3  -1   3 3236.45   65.75
   3  -1   3 3203.69   64.29
   4  -1   3  139.84   11.42
   4  -1   3  163.01   12.04
   5  -1   3 1031.80   33.03
   5  -1   3  996.23   32.69
   6  -1   3   85.90   14.23
   6  -1   3   73.86   14.10
   7  -1   3   18.25   10.46
   7  -1   3   27.79   11.19
   8  -1   3  355.00   23.37
   8  -1   3  343.02   22.82
   9  -1   3   12.24   10.88
   9  -1   3    0.27    9.81
  10  -1   3  313.37   25.35
  11  -1   3  237.08   22.72
  12  -1   3    1.52   14.99
  13  -1   3  141.06   26.20
  14  -1   3  206.91   30.67
  15  -1   3   86.68   26.42
  16  -1   3  -13.89   17.06
  17  -1   3   72.40   26.75
  18   0  -3  -18.21   17.03
  17   0  -3   17.74   19.32
  16   0  -3  -16.65   15.06
  15   0  -3  208.62   30.69
  14   0  -3   14.29   15.93
  13   0  -3   21.59   13.79
  12   0  -3    8.72   12.82
 -11   0   3  561.83   29.53
  11   0  -3  598.66   32.91
  10   0  -3   -6.94    8.98
   9   0  -3  215.75   18.37
   8   0  -3   -7.24    6.86
   7   0  -3   89.78   12.65
   6   0  -3   -6.84    4.14
   5   0  -3   14.49    6.04
   4   0  -3   -2.54    3.30
   3   0  -3 6049.84  102.93
  -3   0   3 5687.12   97.99
  -2   0   3   -1.56    2.23
  -1   0   3  408.56   11.15
   0   0   3    2.32    2.23
   1   0   3  703.52   18.38
   1   0   3  694.95   17.86
   2   0   3   -0.42    4.38
   2   0   3    4.98    4.43
   3   0   3   30.21    6.90
   3   0   3   28.25    6.71
   4   0   3   -4.75    4.54
   4   0   3   -3.48    4.50
   5   0   3  392.56   19.56
   5   0   3  412.50   19.87
   6   0   3   -3.20    8.69
   6   0   3   18.14   10.31
   7   0   3 1070.59   38.66
  -7   0  -3 1028.37   23.81
   7   0   3 1021.50   37.13
   8   0   3   -1.94    8.53
   8   0   3   -4.04    8.48
   9   0   3 1018.36   41.47
   9   0   3  898.45   38.78
  10   0   3    7.32   12.20
  11   0   3  203.72   22.56
  12   0   3   -1.45   14.62
  13   0   3  449.93   34.21
  14   0   3   75.72   24.43
  15   0   3    3.05   16.87
  16   0   3  -10.51   20.26
  17   0   3  -12.64   21.80
  18  -1  -3   19.75   21.51
  17  -1  -3   69.55   24.40
  16  -1  -3   51.77   21.46
  15  -1  -3  101.19   24.13
  14  -1  -3  114.35   23.52
  13  -1  -3  111.47   21.05
  12  -1  -3   35.87   14.63
  11  -1  -3  417.58   28.09
  10  -1  -3   15.65   11.16
   9  -1  -3   29.48   11.82
   8  -1  -3  189.31   16.22
   7  -1  -3  110.29   11.79
   6  -1  -3   11.45    6.41
   5  -1  -3   23.27    6.40
   4  -1  -3  114.19    8.41
   3  -1  -3 2598.99   49.57
  -2   1   3   10.49    3.00
  -1   1   3  338.80   10.32
   0   1   3  574.94   15.03
   1   1   3  347.18   11.66
   1   1   3  353.11   11.98
   2   1   3 2433.17   48.66
   2   1   3 2440.99   49.87
   3   1   3 3173.36   64.82
   3   1   3 3134.13   62.48
   4   1   3  165.14   11.76
   4   1   3  171.61   12.42
   5   1   3  949.49   31.89
   5   1   3  972.08   31.23
   6   1   3   67.53   11.80
   6   1   3   92.40   14.06
   7   1   3   20.32   10.03
   7   1   3   13.54   10.78
   8   1   3  383.08   24.55
   8   1   3  371.28   23.56
   9   1   3    8.83   10.79
   9   1   3    0.80    8.91
  10   1   3  253.10   23.32
  10   1   3  267.44   23.17
  11   1   3  232.36   23.39
  12   1   3   -8.29   14.11
  13   1   3   99.32   23.50
  14   1   3  242.40   33.06
  15   1   3   63.56   24.89
  16   1   3    6.83   19.73
  17   1   3   67.06   27.51
  18  -2  -3   87.90   26.75
  17  -2  -3  -11.16   18.35
  16  -2  -3  184.26   30.47
  15  -2  -3   -2.15   15.51
  14  -2  -3  227.93   30.20
  13  -2  -3    3.87   13.47
  12  -2  -3   94.81   19.38
  11  -2  -3   31.71   13.73
  10  -2  -3  138.85   19.27
   9  -2  -3  121.77   17.25
   8  -2  -3  272.17   18.64
   7  -2  -3  130.95   12.57
   6  -2  -3   -5.47    4.49
   5  -2  -3   72.02    9.19
   4  -2  -3 1708.48   37.69
   3  -2  -3 1120.63   24.98
  -2   2   3    9.65    3.30
  -1   2   3  157.94    7.14
   0   2   3  254.36    9.44
   1   2   3  787.95   20.12
   1   2   3  796.93   19.76
   2   2   3 1193.98   28.53
   2   2   3 1178.09   29.27
   3   2   3   30.36    6.80
   3   2   3   26.34    7.05
   4   2   3  820.82   25.95
   4   2   3  824.90   27.51
   5   2   3   45.93   10.31
   5   2   3   59.17   10.02
   6   2   3 5909.52  114.81
   6   2   3 5843.23  119.13
   7   2   3  235.09   18.63
   7   2   3  262.38   19.71
   8   2   3    8.52    9.98
   8   2   3    2.24    9.10
   9   2   3   39.74   13.39
   9   2   3   40.47   14.41
  10   2   3   13.75   12.92
  10   2   3    1.70   11.26
  11   2   3   43.46   15.68
  12   2   3  152.05   25.51
  13   2   3   76.38   22.46
  14   2   3  443.21   35.86
  15   2   3    0.51   15.42
  16   2   3   12.88   19.83
  17   2   3    0.72   22.45
  18  -3  -3   11.68   20.48
  17  -3  -3  -15.69   16.51
  16  -3  -3   18.72   18.52
  15  -3  -3   10.67   16.97
  14  -3  -3   37.80   18.38
  13  -3  -3   14.89   15.27
  12  -3  -3  380.33   28.42
  11  -3  -3 1284.61   48.21
  10  -3  -3    4.97    9.90
   9  -3  -3  180.90   17.58
   8  -3  -3 2329.70   60.21
   7  -3  -3  385.54   19.73
   6  -3  -3  261.07   14.83
   5  -3  -3  388.56   16.48
   4  -3  -3  464.19   15.68
   3  -3  -3 1317.51   28.10
  -2   3   3  211.84    9.15
  -1   3   3  388.60   12.04
   0   3   3  299.21   10.66
   1   3   3  944.31   22.69
   1   3   3  937.63   23.01
   2   3   3  705.12   20.54
   2   3   3  771.55   21.98
   3   3   3    0.62    4.30
   3   3   3   -4.04    4.40
   4   3   3    7.62    5.37
   4   3   3    4.29    5.27
   5   3   3 1706.77   43.66
   5   3   3 1604.86   45.37
   6   3   3  479.39   22.92
   6   3   3  476.68   24.72
   7   3   3   -5.23    8.26
   7   3   3   -6.34    7.32
   8   3   3  298.67   21.00
   8   3   3  288.17   21.61
   9   3   3   17.62   12.34
   9   3   3   12.44   11.04
  10   3   3  329.87   25.86
  10   3   3  316.89   24.68
  11   3   3   48.57   14.93
  11   3   3   48.80   16.91
  12   3   3  187.12   27.10
  13   3   3   93.16   22.77
  14   3   3  193.21   31.38
  15   3   3    7.81   19.76
  16   3   3  -13.36   19.83
  17   3   3   -6.94   22.04
  18  -4  -3   49.45   25.15
  17  -4  -3   -9.73   17.97
  16  -4  -3   41.99   20.39
  15  -4  -3   37.38   19.72
  14  -4  -3    4.86   14.33
  13  -4  -3  -10.59   12.85
  12  -4  -3  411.56   28.90
  11  -4  -3  346.19   25.51
  10  -4  -3  167.18   17.72
   9  -4  -3  190.94   17.51
   8  -4  -3  107.91   15.17
   7  -4  -3  255.97   16.30
   6  -4  -3   22.81    7.75
   5  -4  -3  100.85    8.90
   4  -4  -3  599.66   18.39
  -2   4   3 2785.79   52.50
  -1   4   3   -0.67    2.93
   0   4   3 1609.77   33.28
   1   4   3 1972.18   39.87
   1   4   3 1939.02   39.64
   2   4   3 1643.52   36.90
   2   4   3 1530.80   34.81
   3   4   3   72.36    7.40
   3   4   3   75.10    8.49
   4   4   3   67.67    9.43
   4   4   3   73.55   10.66
   5   4   3 1412.86   41.66
   5   4   3 1443.71   39.10
   6   4   3   18.38   10.26
   6   4   3   20.09    9.03
   7   4   3  261.56   18.67
   7   4   3  298.24   21.09
   8   4   3    5.68    9.66
   8   4   3   -3.82    8.75
   9   4   3  235.93   19.95
   9   4   3  192.09   19.70
  10   4   3   41.79   14.35
  10   4   3   46.11   13.83
  11   4   3    6.00   13.01
  11   4   3   29.84   14.81
  12   4   3    8.85   14.51
  13   4   3  346.01   30.55
  14   4   3  100.31   24.50
  15   4   3    5.38   17.79
  16   4   3   27.66   22.10
  17   4   3    7.22   21.52
  17  -5  -3   40.40   22.52
  16  -5  -3   -8.53   15.23
  15  -5  -3   19.18   18.23
  14  -5  -3  -13.60   13.00
  13  -5  -3   -7.88   13.75
  12  -5  -3   19.34   13.63
  11  -5  -3  130.70   20.95
  10  -5  -3    7.27   10.37
   9  -5  -3  156.42   16.26
   8  -5  -3  259.60   18.44
   7  -5  -3  251.66   16.82
   6  -5  -3  146.97   11.58
   5  -5  -3  359.52   15.86
   4  -5  -3   68.92    6.42
  -3   5   3 1161.31   25.49
  -2   5   3   21.15    5.18
  -1   5   3   60.02    5.74
   0   5   3 1344.20   27.32
   0   5   3 1299.84   29.14
   1   5   3  137.74    8.00
   1   5   3  137.74    8.39
   2   5   3  491.12   16.46
   2   5   3  491.97   17.32
   3   5   3  393.40   15.59
   3   5   3  370.23   16.59
   4   5   3  223.05   13.07
   4   5   3  227.62   14.55
   5   5   3  122.39   11.64
   5   5   3  121.11   12.77
   6   5   3  504.66   25.26
   6   5   3  541.86   23.70
   7   5   3  133.74   14.74
   7   5   3  154.69   16.48
   8   5   3   -7.80    8.78
   8   5   3  -19.27    6.43
   9   5   3    2.86   10.41
   9   5   3   -9.77    9.31
  10   5   3   69.72   15.56
  10   5   3  102.37   19.14
  11   5   3  121.98   22.44
  11   5   3   56.62   18.63
  12   5   3  111.35   24.22
  13   5   3   31.69   19.11
  14   5   3   14.44   19.66
  15   5   3   55.80   22.71
  16   5   3    6.72   20.77
  17   5   3  136.23   32.32
  16  -6  -3   -9.28   15.89
  15  -6  -3    3.88   16.43
  14  -6  -3   -6.12   14.28
  13  -6  -3   16.92   16.19
  12  -6  -3   61.50   17.99
  11  -6  -3  215.35   21.36
  10  -6  -3  170.67   17.91
   9  -6  -3  179.81   20.44
   8  -6  -3    2.24    8.62
   7  -6  -3 1216.41   37.30
   6  -6  -3   23.38    7.41
  -4   6   3   18.07    5.20
  -3   6   3   23.95    4.60
  -2   6   3  383.13   14.40
  -2   6   3  396.11   11.23
  -1   6   3   45.26    3.87
  -1   6   3   29.34    5.73
   0   6   3   66.94    7.44
   0   6   3   53.25    4.99
   1   6   3  143.15    8.60
   1   6   3  143.03    8.50
   2   6   3    4.54    3.75
   2   6   3    1.45    4.17
   3   6   3  271.11   13.10
   3   6   3  307.18   15.29
   4   6   3   27.26    6.84
   4   6   3   19.32    7.36
   5   6   3   18.60    7.73
   5   6   3   12.00    8.67
   6   6   3  658.62   26.12
   7   6   3 1127.77   41.35
   7   6   3 1194.13   38.91
   8   6   3    1.22    8.60
   8   6   3   -3.16    7.58
   9   6   3  111.73   19.73
   9   6   3  102.78   17.03
  10   6   3   28.46   13.30
  10   6   3   21.46   11.36
  11   6   3  424.05   28.93
  11   6   3  435.56   31.38
  12   6   3   -6.76   13.03
  12   6   3  -10.90   13.60
  13   6   3  108.97   24.07
  14   6   3    1.53   16.23
  15   6   3   15.51   18.83
  16   6   3  -20.85   18.56
  17   6   3   19.09   23.97
  15  -7  -3   55.51   21.03
  14  -7  -3   -8.06   14.51
  13  -7  -3  113.21   22.54
  12  -7  -3  331.41   26.30
  11  -7  -3  543.52   31.16
  10  -7  -3  469.60   27.25
   9  -7  -3   -8.62    8.42
   8  -7  -3  590.91   26.65
   7  -7  -3   10.80    7.55
  -6   7   3  683.83   24.40
  -5   7   3    1.86    5.12
  -4   7   3  712.54   20.68
  -3   7   3 1495.09   31.94
  -2   7   3    2.69    2.98
  -1   7   3  836.69   19.06
  -1   7   3  846.00   22.64
   0   7   3 1133.82   25.60
   0   7   3 1137.44   27.30
   1   7   3 1642.20   36.08
   1   7   3 1664.15   36.60
   2   7   3    4.77    4.58
   2   7   3    1.92    3.89
   3   7   3 1890.90   45.61
   3   7   3 1860.39   42.06
   4   7   3    1.59    5.87
   4   7   3   -3.29    4.56
   5   7   3   39.87    9.10
   5   7   3   33.83   10.31
   6   7   3  386.17   19.75
   7   7   3  236.36   17.21
   7   7   3  216.80   19.22
   8   7   3   -1.46    9.87
   8   7   3   -2.83    8.92
   9   7   3  -14.02    9.73
   9   7   3    4.63   10.13
  10   7   3  144.41   20.92
  10   7   3  143.06   22.61
  11   7   3   32.37   17.29
  11   7   3   29.60   14.61
  12   7   3    4.90   12.00
  12   7   3  -14.51   12.09
  13   7   3   -4.60   15.37
  14   7   3   33.47   21.37
  15   7   3   79.79   23.94
  16   7   3   36.18   21.60
  17   7   3   62.78   29.47
 -17   8   3   81.79  155.20
 -16   8   3  171.17   86.73
 -15   8   3  -55.97   43.87
  13  -8  -3  131.24   22.72
  12  -8  -3  287.86   24.93
  11  -8  -3  173.15   22.53
  10  -8  -3   89.89   16.98
   9  -8  -3    4.36    9.13
  -7   8   3  199.73   15.50
  -6   8   3    1.90    6.21
  -5   8   3   -3.39    4.38
  -4   8   3  711.21   20.86
  -3   8   3  453.98   14.62
  -2   8   3 3356.51   65.74
  -2   8   3 3440.34   62.22
  -1   8   3  264.19    9.56
  -1   8   3  262.18   11.68
   0   8   3  612.57   17.19
   0   8   3  606.40   18.65
   1   8   3   86.28    7.25
   1   8   3   85.94    7.16
   2   8   3  722.43   23.26
   2   8   3  734.41   21.71
   3   8   3  105.19    8.79
   3   8   3   97.91    9.92
   4   8   3   -5.09    4.72
   4   8   3   -2.07    5.99
   5   8   3 1523.09   40.11
   5   8   3 1500.83   44.64
   6   8   3   47.30   10.25
   7   8   3  158.37   20.09
   7   8   3  144.03   14.83
   8   8   3  247.65   19.17
   8   8   3  226.01   20.60
   9   8   3  142.46   19.15
   9   8   3   99.00   19.42
  10   8   3  162.26   24.48
  10   8   3  191.32   23.98
  11   8   3   79.83   20.91
  11   8   3   90.91   19.20
  12   8   3    2.10   15.31
  12   8   3  -24.48   12.06
  13   8   3   -0.37   15.87
  14   8   3   31.23   21.77
  15   8   3   -5.96   18.36
  16   8   3  117.60   28.34
  17   8   3    0.00   22.00
 -17   9   3   72.49  105.25
 -16   9   3  -27.22   56.31
 -15   9   3   39.41   42.74
 -14   9   3   77.44   36.02
 -13   9   3  232.35   41.02
 -12   9   3  359.91   33.83
 -11   9   3   11.08   16.23
 -10   9   3  115.55   21.04
  -9   9   3    5.38   10.90
  -8   9   3  263.95   18.44
  -7   9   3   12.25    8.54
  -6   9   3 1498.16   39.95
  -5   9   3    9.42    6.09
  -4   9   3 1335.56   32.46
  -3   9   3  186.28    9.50
  -2   9   3   35.10    5.32
  -1   9   3   19.80    5.30
  -1   9   3   27.79    4.64
   0   9   3   16.42    5.23
   0   9   3   13.59    4.26
   1   9   3  230.50   11.43
   1   9   3  243.59   11.73
   2   9   3   23.25    6.73
   2   9   3   20.41    5.73
   3   9   3   53.68    8.33
   3   9   3   56.31    9.69
   4   9   3  218.12   13.03
   4   9   3  197.21   14.77
   5   9   3  593.57   22.92
   5   9   3  610.34   26.94
   6   9   3 1898.53   48.61
   6   9   3 1798.55   53.18
   7   9   3   23.76   11.86
   7   9   3   18.54    9.55
   8   9   3  633.77   32.92
   8   9   3  676.60   30.15
   9   9   3  -14.38    9.88
   9   9   3    9.14    8.98
  10   9   3  242.63   24.33
  10   9   3  275.09   22.29
  11   9   3   -6.20   12.76
  11   9   3   -5.37   12.73
  12   9   3  165.78   27.05
  12   9   3  128.83   23.09
  13   9   3   23.65   19.88
  14   9   3  -14.99   16.27
  15   9   3    4.94   19.90
  16   9   3   46.67   24.33
  17   9   3   -7.82   18.66
 -18  10   3  497.19  215.63
 -17  10   3   21.54   69.55
 -16  10   3  352.42   73.30
 -15  10   3    0.35   35.59
 -14  10   3  429.44   43.93
 -13  10   3   61.25   26.96
 -12  10   3  139.07   28.95
 -11  10   3   18.19   17.13
 -10  10   3   30.27   15.06
  -9  10   3   -3.70    8.70
  -8  10   3   -7.74    8.79
  -7  10   3  171.24   14.73
  -6  10   3  419.14   19.07
  -5  10   3 1320.19   34.68
  -4  10   3  254.91   12.90
  -3  10   3   74.97    7.94
  -3  10   3   67.36    6.87
  -2  10   3 1329.32   30.01
  -2  10   3 1285.89   33.73
  -1  10   3   87.48    7.80
  -1  10   3   89.23    6.56
   0  10   3    6.48    3.92
   0  10   3   13.15    4.71
   1  10   3   64.14    8.09
   1  10   3   79.91    7.53
   2  10   3 1461.32   37.69
   2  10   3 1469.38   35.41
   3  10   3   63.43    9.28
   3  10   3   58.67   10.32
   4  10   3 1119.74   36.04
   4  10   3 1117.78   31.90
   5  10   3   14.18    9.22
   5  10   3   12.86    7.62
   6  10   3  159.96   16.65
   6  10   3  200.24   14.67
   7  10   3  747.05   29.76
   7  10   3  705.11   33.24
   8  10   3    8.56   11.65
   8  10   3    5.00    9.20
   9  10   3   11.97   11.11
   9  10   3    2.37   12.22
  10  10   3   16.12   15.28
  10  10   3   23.05   12.72
  11  10   3  137.95   24.52
  11  10   3  166.13   24.57
  12  10   3  123.80   25.46
  13  10   3   21.16   18.51
  14  10   3   63.49   24.60
  15  10   3   13.51   20.01
  16  10   3  156.12   33.06
 -18  11   3  458.21  136.43
 -17  11   3  481.08   89.56
 -16  11   3    3.94   40.29
 -15  11   3  201.21   47.74
 -14  11   3   60.46   29.54
 -13  11   3  323.61   39.17
 -12  11   3   55.13   22.44
 -11  11   3    4.02   14.55
 -10  11   3 1210.58   45.94
  -9  11   3   16.49   11.53
  -8  11   3   63.36   13.21
  -7  11   3  124.75   14.53
  -6  11   3    8.48    7.25
  -5  11   3  817.85   26.23
  -4  11   3  513.38   18.50
  -3  11   3  962.05   29.92
  -3  11   3  949.41   25.72
  -2  11   3   36.43    6.19
  -1  11   3   35.98    6.97
  -1  11   3   56.05    6.72
   0  11   3  394.79   14.84
   0  11   3  384.75   15.61
   1  11   3  244.65   12.44
   1  11   3  246.02   12.74
   2  11   3   62.31    9.67
   2  11   3   44.88    8.12
   3  11   3 2332.03   51.73
   3  11   3 2432.28   57.10
   4  11   3 1323.70   35.85
   4  11   3 1344.02   40.74
   5  11   3    2.28    8.61
   5  11   3   10.34    6.53
   6  11   3    3.16    7.23
   6  11   3  -12.86    7.80
   7  11   3   75.32   13.68
   7  11   3   69.46   15.61
   8  11   3  586.48   32.34
   8  11   3  594.99   28.36
   9  11   3   14.53   11.14
   9  11   3   13.91   13.23
  10  11   3   56.35   16.64
  10  11   3   38.51   14.12
  11  11   3   10.74   12.03
  11  11   3    8.42   13.69
  12  11   3   61.21   19.95
  13  11   3   51.64   21.98
  14  11   3  -23.08   15.73
  15  11   3  135.65   29.56
  16  11   3   16.29   23.14
 -18  12   3   24.20   93.21
 -17  12   3   27.06   53.79
 -16  12   3   15.49   33.75
 -15  12   3   59.97   34.76
 -14  12   3  152.92   33.75
 -13  12   3  268.74   36.80
 -12  12   3    4.76   16.21
 -11  12   3  465.02   30.85
 -10  12   3   77.44   16.77
  -9  12   3  788.07   33.51
  -8  12   3  147.74   17.85
  -7  12   3  716.28   27.64
  -6  12   3  178.84   13.57
  -5  12   3  409.52   18.58
  -4  12   3  679.26   22.42
  -3  12   3  686.92   21.17
  -3  12   3  587.48   23.16
  -2  12   3   31.48    6.35
  -2  12   3   30.62    7.58
  -1  12   3  100.52    8.92
  -1  12   3  106.47    7.62
   0  12   3  722.87   22.01
   0  12   3  712.09   22.74
   1  12   3  182.78   11.60
   1  12   3  167.57   11.35
   2  12   3  197.00   13.24
   2  12   3  181.90   11.98
   3  12   3  319.34   15.77
   3  12   3  380.23   19.80
   4  12   3  282.80   18.31
   4  12   3  305.87   15.87
   5  12   3 1046.00   32.16
   5  12   3  965.58   36.08
   6  12   3  148.86   19.05
   6  12   3  135.98   13.18
   7  12   3  465.77   27.53
   7  12   3  441.71   23.12
   8  12   3   30.57   12.03
   8  12   3   31.87   13.65
   9  12   3 1228.10   49.78
   9  12   3 1225.16   43.99
  10  12   3   14.46   12.06
  10  12   3    3.01   14.67
  11  12   3  195.35   28.22
  12  12   3  109.18   25.01
  13  12   3   46.15   21.26
  14  12   3  -11.97   16.58
  15  12   3   54.80   23.93
  16  12   3  -27.24   18.36
 -18  13   3  136.34   88.23
 -17  13   3   74.12   55.47
 -16  13   3    6.88   28.92
 -15  13   3  381.42   43.37
 -14  13   3   71.34   27.97
 -13  13   3  231.14   33.09
 -12  13   3  235.29   30.66
 -11  13   3  225.55   23.82
 -10  13   3   59.27   16.45
  -9  13   3  152.42   16.80
  -8  13   3   95.27   14.77
  -7  13   3   48.14   11.52
  -6  13   3   69.13   12.01
  -5  13   3 1516.10   39.98
  -4  13   3   97.61   10.17
  -3  13   3  321.15   14.66
  -3  13   3  299.89   17.17
  -2  13   3   73.23   10.47
  -1  13   3  221.87   12.96
  -1  13   3  233.04   11.82
   0  13   3  185.55   11.75
   0  13   3  185.15   11.21
   1  13   3 1848.66   44.81
   1  13   3 1877.93   43.08
   2  13   3   99.48   12.52
   2  13   3  107.92   12.32
   3  13   3   51.87    9.42
   3  13   3   60.98   11.59
   4  13   3  120.30   13.27
   4  13   3  137.02   11.84
   5  13   3  341.78   21.38
   5  13   3  312.85   17.22
   6  13   3  233.71   16.38
   6  13   3  288.12   21.16
   7  13   3   38.85   14.02
   7  13   3   38.89   11.85
   8  13   3  292.73   20.50
   8  13   3  284.56   23.61
   9  13   3   66.32   18.61
   9  13   3   74.57   15.73
  10  13   3  311.36   27.48
  10  13   3  333.43   24.00
  11  13   3   22.06   16.04
  12  13   3   56.87   20.22
  13  13   3  300.12   30.47
  14  13   3   47.30   22.77
  15  13   3   36.45   23.20
  16  13   3  -12.41   21.89
 -17  14   3   31.36   44.15
 -16  14   3  311.66   52.59
 -15  14   3   20.44   28.55
 -14  14   3  513.04   41.22
 -13  14   3  121.80   26.71
 -12  14   3   92.02   24.09
 -11  14   3    4.22   16.00
 -10  14   3   14.39   14.17
  -9  14   3  582.65   28.97
  -8  14   3   28.07   11.16
  -7  14   3  344.69   19.73
  -6  14   3  548.91   23.49
  -5  14   3  357.31   17.71
  -4  14   3  609.55   22.61
  -3  14   3  218.71   12.89
  -3  14   3  202.99   14.88
  -2  14   3  175.02   13.02
  -2  14   3  184.00   11.44
  -1  14   3   99.90    8.50
  -1  14   3  108.15   10.02
   0  14   3 1266.79   33.99
   0  14   3 1263.45   33.78
   1  14   3  176.53   12.71
   1  14   3  178.55   12.16
   2  14   3  599.48   24.00
   2  14   3  581.79   21.47
   3  14   3  450.75   22.02
   3  14   3  457.46   19.24
   4  14   3  771.82   26.82
   4  14   3  769.89   30.77
   5  14   3  776.17   32.71
   5  14   3  781.68   27.84
   6  14   3  290.89   21.80
   6  14   3  295.84   18.23
   7  14   3   -7.29    7.73
   7  14   3    3.21   10.05
   8  14   3   22.41   12.90
   8  14   3    3.19    9.39
   9  14   3  156.22   20.47
   9  14   3  183.07   25.15
  10  14   3   -6.46   13.84
  11  14   3  -15.68   14.17
  12  14   3  253.71   33.30
  13  14   3   17.94   18.99
  14  14   3  122.20   29.20
  15  14   3    3.05   20.98
  16  14   3  133.95   33.44
 -17  15   3   66.23   44.99
 -16  15   3   56.61   32.18
 -15  15   3   43.66   28.02
 -14  15   3  213.07   34.03
 -13  15   3   -3.70   15.44
 -12  15   3  104.51   23.52
 -11  15   3  122.38   22.61
 -10  15   3 1340.13   47.81
  -9  15   3   10.23   12.23
  -8  15   3  398.47   23.06
  -7  15   3   21.73    9.84
  -6  15   3  731.57   27.74
  -5  15   3   -3.86    6.33
  -4  15   3  507.39   21.00
  -3  15   3  532.73   23.93
  -3  15   3  519.40   20.37
  -2  15   3   25.92    7.02
  -1  15   3   78.38    8.35
  -1  15   3   77.23   11.10
   0  15   3  618.28   22.73
   0  15   3  636.09   22.74
   1  15   3  607.25   22.76
   1  15   3  620.75   23.79
   2  15   3  999.15   29.72
   2  15   3  997.13   32.65
   3  15   3    1.29    5.89
   3  15   3   -3.03    6.53
   4  15   3  256.19   15.81
   4  15   3  261.33   18.68
   5  15   3  212.41   18.26
   5  15   3  193.04   14.39
   6  15   3  246.50   17.08
   6  15   3  252.17   20.83
   7  15   3   55.39   12.88
   7  15   3   69.61   15.92
   8  15   3  962.47   42.70
   8  15   3  886.52   35.29
   9  15   3   40.89   17.06
   9  15   3   39.20   13.88
  10  15   3  206.27   28.34
  11  15   3  -20.31   14.22
  12  15   3  127.73   26.90
  13  15   3   -4.84   18.27
  14  15   3    4.10   21.24
  15  15   3   51.36   24.73
  16  15   3   -4.58   19.13
 -17  16   3    4.25   27.51
 -16  16   3  -10.11   26.80
 -15  16   3  103.34   31.44
 -14  16   3  280.03   31.49
 -13  16   3   15.54   19.11
 -12  16   3   75.17   21.45
 -11  16   3  178.31   26.17
 -10  16   3  172.18   19.40
  -9  16   3  140.87   20.41
  -8  16   3  221.91   18.30
  -7  16   3   13.05   10.00
  -6  16   3  617.97   26.11
  -5  16   3   62.73   11.32
  -4  16   3   96.95   12.19
  -3  16   3  113.25   10.73
  -3  16   3  140.94   14.05
  -2  16   3 4184.03   86.21
  -2  16   3 4144.57   82.26
  -1  16   3   99.44    9.77
  -1  16   3   99.35   10.72
   0  16   3 3232.76   68.74
   0  16   3 3227.21   67.91
   1  16   3   15.14    7.41
   1  16   3   21.74    8.46
   2  16   3  459.10   19.67
   2  16   3  467.75   22.11
   3  16   3  -12.39    6.21
   3  16   3   -1.86    6.08
   4  16   3  612.82   28.35
   4  16   3  596.72   24.09
   5  16   3   -8.16    8.41
   5  16   3    5.41    7.34
   6  16   3  379.52   24.90
   6  16   3  375.30   20.79
   7  16   3   62.35   13.56
   7  16   3   64.24   16.93
   8  16   3   33.75   14.24
   8  16   3   41.99   12.33
   9  16   3  690.07   38.24
  10  16   3   26.23   17.49
  11  16   3  -22.34   12.33
  12  16   3  199.39   31.46
  13  16   3   -0.13   18.53
  14  16   3    7.36   21.00
  15  16   3    1.27   20.46
  16  16   3   38.54   23.39
 -17  17   3   93.71   38.09
 -16  17   3   21.36   29.92
 -15  17   3  215.80   36.48
 -14  17   3   21.41   19.82
 -13  17   3  122.76   26.06
 -12  17   3  -17.50   14.24
 -11  17   3  251.66   24.06
 -10  17   3  335.65   25.36
  -9  17   3  -17.20   11.34
  -8  17   3  278.51   20.50
  -7  17   3   20.74   10.58
  -6  17   3 1387.36   41.76
  -5  17   3  378.44   19.81
  -4  17   3  206.41   14.80
  -3  17   3  602.31   23.07
  -3  17   3  602.37   26.93
  -1  17   3  831.35   26.99
  -1  17   3  798.64   28.21
   0  17   3  322.26   17.45
   0  17   3  280.80   16.15
   1  17   3 1255.20   37.59
   1  17   3 1282.75   35.65
   2  17   3  663.32   24.39
   2  17   3  575.42   25.51
   3  17   3   -2.42    7.96
   3  17   3   -1.22    6.37
   4  17   3   81.68   14.61
   4  17   3   59.36   11.35
   5  17   3  169.97   20.31
   5  17   3  124.02   13.19
   6  17   3  166.26   18.63
   6  17   3  166.90   14.65
   7  17   3  -11.30   10.23
   7  17   3  -17.60    6.96
   8  17   3    7.13   13.27
   8  17   3   10.46   11.05
   9  17   3    9.35   14.55
  10  17   3   -2.65   14.77
  11  17   3  -13.35   13.87
  12  17   3    2.63   19.05
  13  17   3  211.54   33.44
  14  17   3   -0.44   20.40
  15  17   3   40.36   24.14
  16  17   3  -12.72   22.33
 -17  18   3  -30.81   29.83
 -16  18   3   -8.33   26.56
 -15  18   3   18.78   22.33
 -14  18   3   72.43   24.06
 -13  18   3  140.41   26.94
 -12  18   3   -7.76   15.34
 -11  18   3  148.96   24.53
 -10  18   3   73.25   19.00
  -9  18   3  710.40   33.51
  -8  18   3  -14.44   10.95
  -7  18   3 1565.28   47.35
  -6  18   3   68.76   13.68
  -5  18   3  533.93   24.29
  -4  18   3    6.88    7.65
  -4  18   3   -3.37    7.36
  -3  18   3 1473.58   40.60
  -3  18   3 1469.59   45.14
  -2  18   3    9.80    8.35
  -2  18   3   11.25    7.75
  -1  18   3   53.63   10.44
   0  18   3   41.80   10.79
   0  18   3   40.83    9.62
   1  18   3  656.67   26.33
   1  18   3  659.02   25.05
   2  18   3  235.40   15.04
   2  18   3  238.24   17.25
   3  18   3  548.20   22.98
   3  18   3  580.67   27.07
   4  18   3    1.06    7.43
   4  18   3    0.97    8.68
   5  18   3 1400.18   41.40
   5  18   3 1399.97   48.34
   6  18   3  210.31   20.49
   6  18   3  187.66   16.33
   7  18   3  179.08   23.24
   7  18   3  148.38   18.27
   8  18   3   -1.74   12.86
   9  18   3  232.00   29.46
  10  18   3   11.20   16.38
  11  18   3   60.04   22.54
  12  18   3  -30.97   13.97
  13  18   3   28.16   21.35
  14  18   3   20.90   22.02
  15  18   3   75.64   28.69
 -17  19   3  157.53   46.66
 -16  19   3  -19.88   27.23
 -15  19   3   49.74   26.67
 -14  19   3   12.71   19.52
 -13  19   3  135.93   27.16
 -12  19   3   -6.69   14.66
 -11  19   3  607.18   34.42
 -10  19   3  228.78   22.51
  -9  19   3   40.77   16.53
  -8  19   3  164.42   20.84
  -7  19   3   24.30   11.70
  -6  19   3  326.99   21.05
  -5  19   3  108.92   14.96
  -4  19   3  762.36   28.31
  -4  19   3  741.87   32.69
  -3  19   3 1502.73   42.30
  -3  19   3 1621.01   48.47
  -2  19   3   14.60    8.00
  -1  19   3 1085.25   35.08
  -1  19   3 1069.64   33.70
   0  19   3   26.59   10.06
   0  19   3   23.67    8.86
   1  19   3 1480.79   43.42
   1  19   3 1497.25   40.73
   2  19   3  422.68   20.04
   2  19   3  409.88   22.44
   3  19   3  177.71   16.32
   3  19   3  157.74   13.75
   4  19   3  345.68   19.37
   4  19   3  375.31   23.97
   5  19   3   13.77   12.29
   5  19   3   12.01    9.28
   6  19   3   40.78   12.12
   6  19   3   28.08   12.73
   7  19   3  -12.62    8.64
   7  19   3   -0.61   11.04
   8  19   3  203.66   22.66
   9  19   3   81.54   21.25
  10  19   3   -9.23   14.11
  11  19   3   52.90   21.30
  12  19   3   -6.57   17.33
  13  19   3   -1.34   19.37
  14  19   3    1.05   20.37
  15  19   3   36.02   25.67
 -16  20   3   56.33   30.30
 -15  20   3   21.48   22.77
 -14  20   3  188.64   30.37
 -13  20   3   34.13   19.48
 -12  20   3  181.52   27.34
 -11  20   3   40.91   17.08
 -10  20   3  479.83   29.80
  -9  20   3  156.52   22.26
  -8  20   3   37.31   15.09
  -7  20   3  486.62   26.31
  -6  20   3  111.14   16.37
  -5  20   3  -10.85    8.29
  -4  20   3  227.71   19.36
  -4  20   3  193.87   15.41
  -3  20   3   42.43   10.77
  -2  20   3 2070.31   55.34
  -2  20   3 2050.69   51.92
  -1  20   3  195.86   15.42
  -1  20   3  166.34   13.93
   0  20   3 1501.69   41.72
   0  20   3 1383.77   41.59
   1  20   3  692.70   26.37
   1  20   3  685.37   28.44
   2  20   3  924.23   34.79
   2  20   3  936.92   31.52
   3  20   3    0.98    8.51
   3  20   3   18.22   11.48
   4  20   3  138.02   19.35
   4  20   3  138.36   14.11
   5  20   3  358.83   21.09
   5  20   3  372.03   25.62
   6  20   3  258.74   18.95
   6  20   3  247.80   22.71
   7  20   3   52.42   17.10
   8  20   3   -5.30   12.69
   9  20   3   29.81   17.53
  10  20   3   70.04   21.18
  11  20   3   21.75   19.38
  12  20   3   57.00   22.76
  13  20   3  -21.03   18.46
  14  20   3  -26.11   19.32
  15  20   3   -0.31   22.15
 -16  21   3   35.80   29.00
 -15  21   3    1.26   21.46
 -14  21   3   12.47   19.08
 -13  21   3  -22.19   15.46
 -12  21   3   56.01   20.23
 -11  21   3   10.65   16.08
 -10  21   3  861.52   39.89
  -9  21   3   -0.72   14.46
  -8  21   3  374.97   25.08
  -7  21   3   56.31   15.36
  -6  21   3 1511.01   46.74
  -5  21   3   -5.77    8.35
  -4  21   3  234.32   19.98
  -4  21   3  197.77   16.02
  -3  21   3  321.24   22.02
  -3  21   3  328.14   19.39
  -2  21   3  336.99   19.44
  -2  21   3  347.49   21.38
  -1  21   3    6.34    8.23
  -1  21   3    6.81    9.04
   0  21   3  161.79   14.53
   0  21   3  168.43   14.13
   1  21   3  187.07   16.15
   1  21   3  200.59   16.06
   2  21   3 1038.39   37.86
   2  21   3 1007.60   33.24
   3  21   3    8.82   11.37
   3  21   3   16.13   10.51
   4  21   3  212.13   16.57
   4  21   3  219.11   19.69
   5  21   3  110.99   19.49
   5  21   3  154.71   15.46
   6  21   3  674.60   35.89
   6  21   3  743.91   30.88
   7  21   3   73.79   19.64
   8  21   3  240.94   24.62
   9  21   3  -16.53   13.87
  10  21   3   -3.10   15.21
  11  21   3   -9.60   16.70
  12  21   3  139.52   30.63
  13  21   3  -15.54   19.86
  14  21   3   10.14   21.42
  15  21   3   24.47   25.61
 -15  22   3   19.75   23.17
 -14  22   3   80.11   24.54
 -13  22   3   21.89   19.92
 -12  22   3   96.89   23.67
 -11  22   3  167.35   25.51
 -10  22   3  212.93   26.06
  -9  22   3   48.03   17.12
  -8  22   3  251.46   22.00
  -7  22   3  508.04   28.37
  -6  22   3   87.91   16.72
  -5  22   3  185.24   16.55
  -4  22   3   22.57   12.45
  -4  22   3   32.79   11.27
  -3  22   3  606.39   26.09
  -3  22   3  593.58   29.70
  -2  22   3  439.58   24.29
  -2  22   3  391.73   21.39
  -1  22   3    1.60    8.21
  -1  22   3   -8.23    7.55
   0  22   3  395.17   21.92
   0  22   3  408.54   21.25
   1  22   3  569.62   27.53
   1  22   3  575.77   25.51
   2  22   3  785.63   33.27
   2  22   3  814.23   30.28
   3  22   3  105.91   17.16
   3  22   3   86.20   13.98
   4  22   3  197.43   23.72
   4  22   3  136.92   14.49
   5  22   3  623.61   28.06
   5  22   3  588.71   32.78
   6  22   3   17.41   12.33
   7  22   3   59.37   18.34
   8  22   3    2.91   13.34
   9  22   3  -11.83   14.25
  10  22   3   96.07   24.45
  11  22   3    8.82   18.92
  12  22   3   93.49   26.97
  13  22   3  -12.03   19.43
  14  22   3   34.05   24.14
  15  22   3   -5.13   22.84
 -15  23   3  124.63   31.05
 -14  23   3   -6.38   16.64
 -13  23   3  139.34   26.65
 -12  23   3   44.87   19.43
 -11  23   3  612.31   35.17
 -10  23   3   41.29   17.28
  -9  23   3   99.65   21.05
  -8  23   3  168.39   24.11
  -7  23   3   10.66   13.28
  -6  23   3   32.11   14.57
  -5  23   3   86.46   15.50
  -5  23   3   72.37   18.13
  -4  23   3    1.05   11.65
  -4  23   3    7.95   11.36
  -3  23   3  912.82   37.42
  -3  23   3  844.63   32.12
  -2  23   3   21.95   10.57
  -2  23   3   33.66   10.63
  -1  23   3  341.75   21.17
  -1  23   3  345.84   20.45
   0  23   3  120.07   16.40
   0  23   3  123.70   16.16
   1  23   3  887.84   32.52
   1  23   3  887.95   35.27
   2  23   3   44.13   11.41
   2  23   3   38.54   12.43
   3  23   3  407.84   22.00
   3  23   3  436.31   26.11
   4  23   3  -11.91    7.45
   4  23   3   -3.45   10.69
   5  23   3   83.64   17.64
   5  23   3   98.60   16.02
   6  23   3  148.89   23.14
   7  23   3   71.41   19.55
   8  23   3  104.82   23.24
   9  23   3    3.72   16.61
  10  23   3   20.75   19.87
  11  23   3   68.83   23.30
  12  23   3   19.71   21.84
  13  23   3   61.20   25.36
  14  23   3  -12.56   20.14
 -14  24   3   -6.94   16.78
 -13  24   3  219.07   30.36
 -12  24   3   26.46   18.13
 -11  24   3  298.68   26.93
 -10  24   3    2.57   13.64
  -9  24   3  344.25   26.59
  -8  24   3    8.69   13.80
  -7  24   3  463.86   27.60
  -6  24   3   78.08   17.69
  -5  24   3  176.08   17.30
  -5  24   3  209.76   21.49
  -4  24   3  -17.10    8.48
  -4  24   3   -7.68    9.99
  -3  24   3  116.77   18.50
  -3  24   3  141.36   17.55
  -2  24   3  287.46   19.49
  -2  24   3  299.84   21.08
  -1  24   3   76.96   14.04
  -1  24   3   95.58   15.58
   0  24   3   20.94   10.55
   0  24   3   18.30   10.01
   1  24   3  518.87   27.46
   1  24   3  524.86   25.39
   2  24   3  178.24   17.92
   2  24   3  158.71   14.91
   3  24   3   40.51   11.83
   3  24   3   64.27   15.97
   4  24   3   36.42   15.27
   4  24   3   22.61   11.49
   5  24   3  826.08   39.76
   6  24   3  143.74   23.91
   7  24   3  333.87   28.12
   8  24   3   83.94   21.85
   9  24   3  142.98   27.07
  10  24   3   -7.07   17.75
  11  24   3  213.36   33.45
  12  24   3   20.58   20.30
  13  24   3  -10.15   21.17
  14  24   3  -25.36   21.82
 -14  25   3   -4.35   17.56
 -13  25   3  143.72   25.58
 -12  25   3   83.89   23.09
 -11  25   3   78.69   22.03
 -10  25   3  225.26   28.28
  -9  25   3    1.61   15.57
  -8  25   3  284.00   24.07
  -7  25   3   70.49   18.40
  -6  25   3  289.74   23.18
  -5  25   3  210.15   26.02
  -5  25   3  188.44   18.10
  -4  25   3   43.56   15.56
  -4  25   3   48.39   15.03
  -3  25   3   -0.20   10.64
  -3  25   3   13.63   10.74
  -2  25   3   18.59   11.08
  -2  25   3    9.32   11.01
  -1  25   3  216.28   17.63
  -1  25   3  268.58   19.95
   0  25   3   -4.98    8.36
   0  25   3    4.27   10.10
   1  25   3  311.33   22.39
   1  25   3  337.66   21.18
   2  25   3  208.42   17.42
   2  25   3  202.64   19.27
   3  25   3  160.56   15.88
   3  25   3  186.52   18.98
   4  25   3   13.91   13.21
   4  25   3   10.89   10.73
   5  25   3  341.46   26.83
   6  25   3  115.49   23.00
   7  25   3   83.62   21.42
   8  25   3   41.67   20.77
   9  25   3    2.75   16.24
  10  25   3   34.77   21.00
  11  25   3   28.29   22.44
  12  25   3   76.25   25.47
  13  25   3   36.81   25.34
  14  25   3  -21.57   24.30
 -13  26   3   14.20   19.04
 -12  26   3   79.45   22.89
 -11  26   3   45.62   20.62
 -10  26   3   37.90   18.19
  -9  26   3   75.93   20.85
  -8  26   3  -15.28   13.27
  -7  26   3   25.91   15.25
  -6  26   3  256.67   25.75
  -6  26   3  266.75   22.73
  -5  26   3  218.44   27.27
  -5  26   3  208.69   24.18
  -4  26   3   25.71   13.99
  -4  26   3   30.47   12.87
  -3  26   3    2.89   10.48
  -3  26   3   -7.67    9.60
  -2  26   3  154.22   21.25
  -2  26   3  126.48   18.26
  -1  26   3    5.23    9.81
  -1  26   3   24.17   11.28
   0  26   3  216.31   18.42
   0  26   3  195.57   17.33
   1  26   3   51.65   13.33
   1  26   3   64.56   15.10
   2  26   3  678.16   29.50
   2  26   3  710.29   34.11
   3  26   3   40.85   12.67
   3  26   3   38.47   14.57
   4  26   3  138.58   21.54
   5  26   3   11.46   13.10
   6  26   3   62.63   18.46
   7  26   3   16.63   17.04
   8  26   3   31.51   17.92
   9  26   3   46.98   20.97
  10  26   3   11.77   20.07
  11  26   3   -6.30   19.58
  12  26   3  106.61   29.55
  13  26   3    7.68   24.07
  14  26   3   78.42   28.34
 -13  27   3    3.00   17.85
 -12  27   3  146.36   27.74
 -11  27   3   51.51   21.20
 -10  27   3  373.00   29.86
  -9  27   3   59.30   19.39
  -8  27   3  309.26   25.49
  -7  27   3  -19.55   13.79
  -6  27   3  310.57   28.31
  -6  27   3  307.98   23.76
  -5  27   3   -9.82   13.95
  -5  27   3   -6.63   12.37
  -4  27   3  167.90   21.86
  -4  27   3  200.88   25.20
  -3  27   3   84.85   18.72
  -3  27   3   55.21   14.73
  -2  27   3   34.76   12.49
  -2  27   3   17.76   12.16
  -1  27   3  102.36   17.28
  -1  27   3  108.26   17.83
   0  27   3   12.92   11.14
   0  27   3   24.48   10.77
   1  27   3  108.43   16.45
   1  27   3  124.34   19.06
   2  27   3   75.87   16.78
   2  27   3   73.47   14.74
   3  27   3  119.57   20.08
   3  27   3  118.96   16.78
   4  27   3  182.48   24.66
   5  27   3  115.09   22.80
   6  27   3  172.58   26.30
   7  27   3   72.24   21.30
   8  27   3  231.17   32.49
   9  27   3   61.82   23.53
  10  27   3  195.71   32.42
  11  27   3    6.99   21.34
  12  27   3   14.27   22.99
  13  27   3   25.81   26.08
 -12  28   3   15.05   20.02
 -11  28   3  141.85   26.37
 -10  28   3   12.39   18.54
  -9  28   3  233.87   28.15
  -8  28   3    5.22   15.81
  -7  28   3  169.61   28.91
  -7  28   3  150.46   24.12
  -6  28   3  113.60   20.66
  -6  28   3   95.53   23.18
  -5  28   3   -4.19   13.41
  -5  28   3   -4.56   14.32
  -4  28   3  229.75   20.21
  -4  28   3  247.72   23.30
  -3  28   3  127.98   19.97
  -3  28   3  135.81   21.44
  -2  28   3  120.71   18.49
  -2  28   3  114.58   19.29
  -1  28   3   23.96   12.43
  -1  28   3   31.24   12.18
   0  28   3  288.40   21.15
   0  28   3  273.72   21.66
   1  28   3   14.13   11.20
   1  28   3   20.27   12.87
   2  28   3   93.62   19.03
   2  28   3   93.55   16.58
   3  28   3  179.94   17.29
   3  28   3  194.27   21.70
   4  28   3  141.53   23.31
   5  28   3  230.71   28.68
   6  28   3   54.89   18.49
   7  28   3   23.21   18.15
   8  28   3   17.43   17.44
   9  28   3  114.56   26.57
  10  28   3   -3.26   18.10
  11  28   3  115.52   29.46
  12  28   3    6.40   24.67
  13  28   3  -25.70   22.42
 -12  29   3  -20.73   17.73
 -11  29   3   38.34   21.29
 -10  29   3   10.81   17.90
  -9  29   3   20.47   17.28
  -8  29   3    1.51   15.78
  -7  29   3   -2.98   16.68
  -7  29   3  -14.98   12.13
  -6  29   3   46.70   18.88
  -6  29   3   34.59   19.31
  -5  29   3  170.60   19.09
  -5  29   3  182.38   27.43
  -4  29   3  111.45   21.51
  -4  29   3   74.56   17.70
  -3  29   3  259.71   23.26
  -3  29   3  296.92   22.96
  -2  29   3    0.79   11.20
  -2  29   3   -5.64   11.28
  -1  29   3  242.12   20.84
  -1  29   3  233.52   20.18
   0  29   3   43.23   13.58
   0  29   3   57.56   15.59
   1  29   3  377.56   26.20
   1  29   3  454.73   26.13
   2  29   3   65.92   18.03
   2  29   3   72.10   14.95
   3  29   3   80.00   18.48
   4  29   3   96.65   22.36
   5  29   3  251.43   26.27
   6  29   3   -7.04   14.78
   7  29   3   -4.35   14.74
   8  29   3  -16.20   16.89
   9  29   3   57.00   23.59
  10  29   3  -34.54   15.47
  11  29   3    9.64   20.00
  12  29   3   29.00   24.59
  13  29   3   45.13   26.77
 -11  30   3  181.29   28.22
 -10  30   3   12.19   17.41
  -9  30   3  230.40   29.25
  -8  30   3  -14.26   17.44
  -8  30   3  -14.14   13.19
  -7  30   3  191.05   31.22
  -7  30   3  191.88   25.76
  -6  30   3    6.30   16.47
  -6  30   3   -4.76   14.36
  -5  30   3  503.52   30.08
  -5  30   3  452.32   33.14
  -4  30   3   28.78   15.90
  -4  30   3   27.50   16.72
  -3  30   3   27.37   13.89
  -3  30   3   39.73   15.79
  -2  30   3   17.87   13.75
  -2  30   3   -1.75   12.24
  -1  30   3   26.76   15.13
  -1  30   3   52.88   15.73
   0  30   3  162.12   22.61
   0  30   3  159.64   21.58
   1  30   3   27.73   12.90
   1  30   3   55.71   16.28
   2  30   3   -6.08   13.12
   2  30   3  -10.51   10.04
   3  30   3  194.38   26.19
   4  30   3  106.74   21.83
   5  30   3  218.85   24.72
   6  30   3   -4.06   16.39
   7  30   3   96.55   24.93
   8  30   3    3.01   17.21
   9  30   3   90.60   26.54
  10  30   3    3.06   21.20
  11  30   3    9.29   22.29
  12  30   3   36.33   24.65
  13  30   3   32.13   27.08
 -10  31   3  223.15   25.35
  -9  31   3  130.86   25.48
  -9  31   3  130.52   27.68
  -8  31   3    9.30   19.26
  -8  31   3   31.61   18.96
  -7  31   3    8.62   17.90
  -7  31   3   15.79   16.78
  -6  31   3  212.70   30.61
  -6  31   3  212.67   27.23
  -5  31   3  143.06   22.11
  -5  31   3  120.56   24.51
  -4  31   3  127.38   21.12
  -4  31   3   96.48   21.69
  -3  31   3  164.45   23.11
  -3  31   3  200.43   26.48
  -2  31   3   -9.78   10.75
  -2  31   3   -0.55   12.51
  -1  31   3  227.26   21.68
  -1  31   3  247.47   22.22
   0  31   3   42.61   14.50
   1  31   3   82.55   17.77
   1  31   3   99.54   19.66
   2  31   3   61.56   18.93
   3  31   3   98.36   21.22
   4  31   3  232.42   24.81
   5  31   3   17.34   17.49
   6  31   3   25.17   17.97
   7  31   3   28.26   19.72
   8  31   3  105.18   27.08
   9  31   3  -20.45   19.15
  10  31   3   48.74   25.26
  11  31   3  -13.25   18.37
  12  31   3    6.80   24.13
 -10  32   3    6.21   17.88
  -9  32   3   46.12   20.21
  -9  32   3   40.49   23.47
  -8  32   3   58.59   21.72
  -8  32   3   43.16   22.29
  -7  32   3   13.43   19.88
  -7  32   3   -1.46   15.10
  -6  32   3   52.22   21.32
  -6  32   3   75.09   19.33
  -5  32   3   60.66   20.86
  -5  32   3   86.11   20.93
  -4  32   3  247.25   25.33
  -4  32   3  243.55   22.69
  -3  32   3    2.63   14.69
  -3  32   3  -10.49   13.06
  -2  32   3  248.38   23.08
  -2  32   3  212.40   21.65
  -1  32   3   45.59   15.72
  -1  32   3   44.78   17.62
   0  32   3  703.12   36.60
   0  32   3  647.95   32.83
   1  32   3   -7.71   12.73
   1  32   3   -4.69   10.89
   2  32   3  168.86   26.86
   3  32   3    6.74   16.01
   4  32   3   21.54   16.90
   5  32   3  -24.46   14.63
   6  32   3  -15.55   14.83
   7  32   3   66.48   23.20
   8  32   3   41.68   22.79
   9  32   3  -27.97   15.57
  10  32   3   -6.67   18.95
  11  32   3  -19.75   20.56
  12  32   3    7.39   26.15
 -10  33   3   23.84   23.44
  -9  33   3   16.12   20.25
  -9  33   3   30.02   18.76
  -8  33   3  225.00   35.08
  -8  33   3  245.30   26.45
  -7  33   3   -9.65   15.80
  -7  33   3   11.56   18.92
  -6  33   3  225.28   24.03
  -6  33   3  260.22   34.69
  -5  33   3   98.26   24.02
  -5  33   3  113.22   21.64
  -4  33   3  191.84   21.10
  -4  33   3  131.21   24.59
  -3  33   3  -10.61   13.35
  -3  33   3  -16.31   12.33
  -2  33   3  230.81   27.29
  -2  33   3  225.75   22.91
  -1  33   3  220.78   25.92
  -1  33   3  223.76   27.64
   0  33   3  160.65   22.03
   0  33   3  123.38   23.20
   1  33   3  125.07   23.33
   2  33   3   22.74   16.80
   3  33   3  114.44   24.63
   4  33   3   75.01   22.12
   5  33   3   15.77   18.10
   6  33   3  118.62   26.70
   7  33   3   -6.96   17.78
   8  33   3   36.98   22.30
   9  33   3   -7.68   18.92
  10  33   3   28.28   24.07
  11  33   3  -23.94   18.33
 -12  34   3   91.83   36.63
 -11  34   3   44.07   27.85
 -10  34   3   12.60   22.47
  -9  34   3  112.16   29.01
  -8  34   3   28.67   19.51
  -8  34   3   59.11   24.50
  -7  34   3  194.19   28.81
  -7  34   3  197.86   33.13
  -6  34   3    3.05   15.79
  -6  34   3    0.28   18.15
  -5  34   3  234.55   23.79
  -5  34   3  227.76   31.67
  -4  34   3  256.29   29.54
  -4  34   3  215.37   29.93
  -3  34   3   81.18   20.18
  -3  34   3   72.02   22.30
  -2  34   3   32.34   17.99
  -2  34   3   47.95   17.46
  -1  34   3   59.68   19.89
  -1  34   3   19.53   15.76
   0  34   3   17.74   15.62
   0  34   3   21.19   13.91
   1  34   3   34.28   18.48
   2  34   3  186.61   28.16
   3  34   3  187.63   28.04
   4  34   3   23.10   17.91
   5  34   3  104.93   25.23
   6  34   3   17.18   20.37
   7  34   3   25.15   22.30
   8  34   3  -15.40   19.96
   9  34   3   38.02   25.18
  10  34   3   -8.99   19.23
  11  34   3   21.09   23.43
 -12  35   3   78.92   34.23
 -11  35   3   22.75   26.53
 -10  35   3   17.49   23.04
  -9  35   3   15.48   22.21
  -8  35   3  -12.25   16.85
  -8  35   3   13.35   20.78
  -7  35   3   61.56   25.17
  -7  35   3    3.32   16.74
  -6  35   3    8.63   18.13
  -6  35   3   22.83   20.63
  -5  35   3   49.68   20.62
  -5  35   3  116.44   24.29
  -4  35   3   23.64   17.97
  -4  35   3    0.08   16.67
  -3  35   3  172.76   26.30
  -3  35   3  273.70   32.93
  -2  35   3   47.36   19.84
  -2  35   3   63.58   21.75
  -1  35   3  304.08   26.12
  -1  35   3  339.05   28.14
   0  35   3  -22.87   14.46
   1  35   3   48.20   21.29
   2  35   3   82.43   22.40
   3  35   3  265.45   32.34
   4  35   3   26.87   20.25
   5  35   3  -13.83   16.31
   6  35   3    7.37   20.79
   7  35   3    1.28   20.20
   8  35   3  -21.87   19.08
   9  35   3  -25.35   20.40
  10  35   3   48.17   28.25
  11  35   3    5.83   25.04
 -11  36   3   52.52   28.64
 -10  36   3   12.02   23.89
  -9  36   3  104.89   31.12
  -8  36   3  -15.35   18.85
  -7  36   3   48.51   24.24
  -7  36   3   32.95   20.48
  -6  36   3   12.25   18.29
  -6  36   3   10.64   17.07
  -5  36   3   48.98   21.58
  -5  36   3  120.03   24.70
  -4  36   3    5.49   16.45
  -4  36   3   29.02   21.02
  -3  36   3    7.00   17.12
  -3  36   3    1.74   16.29
  -2  36   3   86.90   22.66
  -2  36   3  102.15   23.57
  -1  36   3  134.00   25.27
  -1  36   3  135.44   23.21
   0  36   3  121.95   26.36
   1  36   3  -13.29   16.17
   2  36   3   13.11   19.14
   3  36   3   28.01   18.87
   4  36   3  -30.97   17.30
   5  36   3  -30.58   15.45
   6  36   3   -0.43   20.42
   7  36   3  281.89   38.85
   8  36   3   23.17   23.33
   9  36   3   29.68   27.25
  10  36   3   -4.10   22.63
 -11  37   3    5.06   25.46
 -10  37   3   -7.72   21.19
  -9  37   3   15.34   22.86
  -8  37   3   81.04   28.00
  -7  37   3   14.98   21.12
  -6  37   3   50.44   20.76
  -6  37   3   21.15   20.60
  -5  37   3   -6.17   17.34
  -5  37   3   10.32   17.25
  -4  37   3   -3.69   17.07
  -4  37   3   -5.53   16.14
  -3  37   3    1.46   17.50
  -3  37   3   -0.07   16.95
  -2  37   3  162.92   26.59
  -2  37   3  137.49   26.65
  -1  37   3   11.46   16.74
   0  37   3   21.64   17.56
   1  37   3   -5.98   17.32
   2  37   3   28.07   19.61
   3  37   3  170.93   28.85
   4  37   3   -2.44   16.46
   5  37   3    7.01   20.37
   6  37   3  133.34   30.67
   7  37   3    4.58   22.07
   8  37   3   14.79   22.22
   9  37   3  -12.08   24.67
 -10  38   3  -36.08   19.56
  -9  38   3   -9.33   22.39
  -8  38   3   75.30   27.22
  -7  38   3  -17.57   19.07
  -6  38   3   -6.82   17.64
  -6  38   3  -32.04   17.79
  -5  38   3  -29.45   16.30
  -5  38   3   -2.72   16.95
  -4  38   3  108.36   25.42
  -4  38   3  107.41   23.73
  -3  38   3  -28.71   14.57
  -3  38   3  -16.36   14.53
  -2  38   3    3.08   16.71
  -2  38   3   25.65   17.67
  -1  38   3    2.06   17.17
   0  38   3  -19.74   13.67
   1  38   3   -8.13   16.72
   2  38   3  201.80   30.48
   3  38   3   26.20   21.00
   4  38   3   28.70   22.19
   5  38   3    1.02   21.71
   6  38   3   94.80   28.66
   7  38   3    0.94   22.63
   8  38   3   -0.93   20.80
   9  38   3   -3.31   23.79
  -9  39   3   -4.71   23.17
  -8  39   3   16.87   23.54
  -7  39   3   -8.93   19.89
  -6  39   3  -14.27   18.78
  -5  39   3  -27.59   16.24
  -5  39   3    1.57   18.17
  -4  39   3    3.24   17.67
  -4  39   3    6.13   17.18
  -3  39   3    9.60   17.30
  -3  39   3   -3.46   16.03
  -2  39   3   50.88   21.49
  -1  39   3   14.23   17.95
   0  39   3   -5.25   15.62
   1  39   3  -40.17   15.90
   2  39   3   32.35   20.10
   3  39   3   73.12   24.24
   4  39   3   -5.99   19.03
   5  39   3   14.24   21.80
   6  39   3   68.02   27.67
   7  39   3   -6.84   21.60
   8  39   3   48.18   28.90
  -9  40   3    4.73   23.80
  -8  40   3   -8.30   22.21
  -7  40   3   60.78   25.70
  -6  40   3   -7.97   19.83
  -5  40   3   -5.41   18.63
  -4  40   3   -9.65   16.64
  -4  40   3   12.88   17.89
  -3  40   3   -5.19   16.51
  -2  40   3   23.55   19.22
  -1  40   3   50.11   21.88
   0  40   3   36.32   19.96
   1  40   3   13.94   19.01
   2  40   3   17.66   19.57
   3  40   3  -10.35   17.27
   4  40   3    4.18   19.75
   5  40   3    7.00   21.63
   6  40   3   43.43   25.92
   7  40   3  121.15   32.24
   8  40   3   16.68   26.00
  -8  41   3  -20.59   21.62
  -7  41   3   -6.27   20.38
  -6  41   3  -27.44   19.23
  -5  41   3   -2.86   19.67
  -4  41   3    3.57   18.54
  -3  41   3   35.31   20.48
  -2  41   3  -25.12   16.01
  -1  41   3  132.84   29.05
   0  41   3   -5.13   18.49
   1  41   3   35.90   22.86
   2  41   3   -1.01   19.43
   3  41   3   82.59   26.92
   4  41   3   33.70   23.64
   5  41   3   40.79   26.14
   6  41   3   -9.20   21.52
   7  41   3   43.18   27.34
  -7  42   3  -41.29   19.58
  -6  42   3    8.33   21.55
  -5  42   3   89.46   26.72
  -3  42   3   18.29   20.48
  -2  42   3    0.26   19.10
  -1  42   3   12.13   20.54
   0  42   3    9.80   19.09
   1  42   3   10.94   21.53
   2  42   3   50.37   23.86
   3  42   3   36.44   22.64
   4  42   3    5.43   21.34
   5  42   3   31.63   23.42
   6  42   3   -8.64   23.43
  -6  43   3    5.40   21.06
  -1  43   3  141.34   28.20
   0  43   3   41.69   22.78
   1  43   3   28.19   22.03
   2  43   3    6.33   21.71
   3  43   3   53.99   26.39
   4  43   3    2.52   21.67
   5  43   3   51.12   27.61
  -1  44   3   -4.58   19.95
   0  44   3  168.89   33.18
   1  44   3   17.02   23.06
   2  44   3   20.39   23.41
   3  44   3    0.72   22.00
   4  44   3   47.83   28.41
   1  45   3    6.82   22.41
   2  45   3   -1.18   23.53
   2  45  -4    3.14   23.08
   1  45  -4   83.25   28.77
   0  45  -4   29.80   24.43
   5  44  -4   50.55   28.37
   4  44  -4   -4.83   21.48
   3  44  -4    7.88   23.28
   2  44  -4   -6.99   21.96
   1  44  -4   -0.87   22.09
   0  44  -4   59.37   25.11
  -1  44  -4    3.12   22.54
  -2  44  -4    8.74   22.72
  -3  44  -4   54.90   26.22
   6  43  -4   31.78   23.54
   5  43  -4   -7.66   23.38
   4  43  -4   74.78   29.06
   3  43  -4  -11.51   20.14
   2  43  -4   -3.64   20.53
   1  43  -4   69.36   26.34
   0  43  -4   21.84   23.74
  -1  43  -4   68.91   26.49
  -2  43  -4   -2.58   20.13
  -3  43  -4    9.23   21.43
  -4  43  -4   61.73   25.71
[truncated: 1,368,223 more chars]
