# Supplementary material
Source: MDPI journal article supplement (https://www.mdpi.com/2073-4352/8/5/229)
Supplement: s1 [file s1 › 4.cif]

 
data_170527g
 
_audit_creation_method            'SHELXL-2014/7'
_shelx_SHELXL_version_number      '2014/7'
_chemical_name_systematic         ?
_chemical_name_common             ?
_chemical_melting_point           ?
_chemical_formula_moiety          ?
_chemical_formula_sum
 'C98.50 H79.50 Dy Fe4 N12.50 O20' 
_chemical_formula_weight          2144.14

loop_
 _atom_type_symbol
 _atom_type_description
 _atom_type_scat_dispersion_real
 _atom_type_scat_dispersion_imag
 _atom_type_scat_source
 'C'  'C'   0.0033   0.0016
 'International Tables Vol C Tables 4.2.6.8 and 6.1.1.4'
 'H'  'H'   0.0000   0.0000
 'International Tables Vol C Tables 4.2.6.8 and 6.1.1.4'
 'N'  'N'   0.0061   0.0033
 'International Tables Vol C Tables 4.2.6.8 and 6.1.1.4'
 'O'  'O'   0.0106   0.0060
 'International Tables Vol C Tables 4.2.6.8 and 6.1.1.4'
 'Fe'  'Fe'   0.3463   0.8444
 'International Tables Vol C Tables 4.2.6.8 and 6.1.1.4'
 'Dy'  'Dy'  -0.1892   4.4098
 'International Tables Vol C Tables 4.2.6.8 and 6.1.1.4'
 
_space_group_crystal_system       monoclinic
_space_group_IT_number            14
_space_group_name_H-M_alt         'P 21/n'
_space_group_name_Hall            '-P 2yn'
 
_shelx_space_group_comment
;
The symmetry employed for this shelxl refinement is uniquely defined
by the following loop, which should always be used as a source of
symmetry information in preference to the above space-group names.
They are only intended as comments.
;
 
loop_
 _space_group_symop_operation_xyz
 'x, y, z'
 '-x+1/2, y+1/2, -z+1/2'
 '-x, -y, -z'
 'x-1/2, -y-1/2, z-1/2'
 
_cell_length_a                    14.3011(13)
_cell_length_b                    34.231(3)
_cell_length_c                    19.5141(17)
_cell_angle_alpha                 90
_cell_angle_beta                  106.873(3)
_cell_angle_gamma                 90
_cell_volume                      9141.7(14)
_cell_formula_units_Z             4
_cell_measurement_temperature     298(2)
_cell_measurement_reflns_used     9076 
_cell_measurement_theta_min       2.261 
_cell_measurement_theta_max       23.9765
 
_exptl_crystal_description        acicular 
_exptl_crystal_colour             dark 
_exptl_crystal_density_meas       ?
_exptl_crystal_density_method     ?
_exptl_crystal_density_diffrn     1.558          
_exptl_crystal_F_000              4352
_exptl_transmission_factor_min    ?
_exptl_transmission_factor_max    ?
_exptl_crystal_size_max           0.450
_exptl_crystal_size_mid           0.340
_exptl_crystal_size_min           0.280
_exptl_absorpt_coefficient_mu     1.507
_shelx_estimated_absorpt_T_min    0.550
_shelx_estimated_absorpt_T_max    0.678
_exptl_absorpt_correction_type    multi-scan 
_exptl_absorpt_correction_T_min   0.5504 
_exptl_absorpt_correction_T_max   0.6777 
_exptl_absorpt_process_details    sadabs 
_exptl_absorpt_special_details    ?
_diffrn_ambient_temperature       298(2)
_diffrn_radiation_wavelength      0.71073
_diffrn_radiation_type            MoK\a
_diffrn_source                    ?
_diffrn_radiation_monochromator   graphite 
_diffrn_measurement_device_type   'CCD area detector' 
_diffrn_measurement_method        'phi and omega scans' 
_diffrn_detector_area_resol_mean  ?
_diffrn_reflns_number             45803
_diffrn_reflns_av_unetI/netI      0.0999
_diffrn_reflns_av_R_equivalents   0.0724
_diffrn_reflns_limit_h_min        -16
_diffrn_reflns_limit_h_max        16
_diffrn_reflns_limit_k_min        -40
_diffrn_reflns_limit_k_max        35
_diffrn_reflns_limit_l_min        -21
_diffrn_reflns_limit_l_max        23
_diffrn_reflns_theta_min          2.261
_diffrn_reflns_theta_max          25.020
_diffrn_reflns_theta_full         25.020
_diffrn_measured_fraction_theta_max   0.998
_diffrn_measured_fraction_theta_full  0.998
_diffrn_reflns_Laue_measured_fraction_max    0.998
_diffrn_reflns_Laue_measured_fraction_full   0.998
_diffrn_reflns_point_group_measured_fraction_max   0.998
_diffrn_reflns_point_group_measured_fraction_full  0.998
_reflns_number_total              16090
_reflns_number_gt                 10256
_reflns_threshold_expression      'I > 2\s(I)'
_reflns_Friedel_coverage          0.000
_reflns_Friedel_fraction_max      .
_reflns_Friedel_fraction_full     .
 
_reflns_special_details
;
 Reflections were merged by SHELXL according to the crystal
 class for the calculation of statistics and refinement.
 
 _reflns_Friedel_fraction is defined as the number of unique
 Friedel pairs measured divided by the number that would be
 possible theoretically, ignoring centric projections and
 systematic absences.
;
 
_computing_data_collection        'Bruker SMART' 
_computing_cell_refinement        'Bruker SMART' 
_computing_data_reduction         'Bruker SHELXTL'
_computing_structure_solution     'SHELXL-2014/7 (Sheldrick, 2014)'
_computing_structure_refinement 'SHELXL-2014/7 (Sheldrick, 2014)'
_computing_molecular_graphics     'Bruker SHELXTL' 
_computing_publication_material   'Bruker SHELXTL'
_refine_special_details           ?
_refine_ls_structure_factor_coef  Fsqd
_refine_ls_matrix_type            full
_refine_ls_weighting_scheme       calc
_refine_ls_weighting_details
'w=1/[\s^2^(Fo^2^)+(0.0612P)^2^+56.1914P] where P=(Fo^2^+2Fc^2^)/3'
_atom_sites_solution_primary      ?
_atom_sites_solution_secondary    ?
_atom_sites_solution_hydrogens    geom
_refine_ls_hydrogen_treatment     constr
_refine_ls_extinction_method      none
_refine_ls_extinction_coef        .
_refine_ls_number_reflns          16090
_refine_ls_number_parameters      1225
_refine_ls_number_restraints      4033
_refine_ls_R_factor_all           0.1238
_refine_ls_R_factor_gt            0.0706
_refine_ls_wR_factor_ref          0.1846
_refine_ls_wR_factor_gt           0.1591
_refine_ls_goodness_of_fit_ref    1.047
_refine_ls_restrained_S_all       6.553
_refine_ls_shift/su_max           0.001
_refine_ls_shift/su_mean          0.000
 
loop_
 _atom_site_label
 _atom_site_type_symbol
 _atom_site_fract_x
 _atom_site_fract_y
 _atom_site_fract_z
 _atom_site_U_iso_or_equiv
 _atom_site_adp_type
 _atom_site_occupancy
 _atom_site_site_symmetry_order  
 _atom_site_calc_flag
 _atom_site_refinement_flags_posn
 _atom_site_refinement_flags_adp
 _atom_site_refinement_flags_occupancy
 _atom_site_disorder_assembly
 _atom_site_disorder_group
N9 N 0.9219(7) 0.7428(3) 0.6295(5) 0.064(2) Uani 1 1 d D U . . .
N11 N 0.0668(7) 0.7739(3) 0.5698(5) 0.067(2) Uani 1 1 d D U . . .
H22 H 0.0287 0.7635 0.5917 0.080 Uiso 1 1 calc R U . . .
N12 N 0.8874(17) 0.4763(9) 0.6408(12) 0.317(8) Uani 1 1 d D U . . .
N22 N 0.5612(17) 0.3717(6) 0.7543(13) 0.189(5) Uani 1 1 d . U . . .
Dy1 Dy 0.46936(3) 0.66608(2) 0.75198(2) 0.03140(13) Uani 1 1 d . U . . .
Fe1 Fe 0.43230(9) 0.58764(4) 0.88255(6) 0.0317(3) Uani 1 1 d . U . . .
Fe2 Fe 0.68722(8) 0.59839(3) 0.77516(6) 0.0315(3) Uani 1 1 d . U . . .
Fe3 Fe 0.19929(8) 0.63947(4) 0.67422(6) 0.0309(3) Uani 1 1 d . U . . .
Fe4 Fe 0.45291(9) 0.64369(4) 0.55705(6) 0.0329(3) Uani 1 1 d . U . . .
N1 N 0.5740(5) 0.6247(2) 0.6357(4) 0.0343(14) Uani 1 1 d . U . . .
N2 N 0.6122(5) 0.5991(2) 0.8501(4) 0.0327(14) Uani 1 1 d . U . . .
N3 N 0.3240(5) 0.5953(2) 0.7872(4) 0.0327(14) Uani 1 1 d . U . . .
N4 N 0.2803(5) 0.6479(2) 0.6040(4) 0.0341(15) Uani 1 1 d . U . . .
N5 N 0.1027(5) 0.6309(2) 0.7430(4) 0.0356(15) Uani 1 1 d . U . . .
N6 N 0.3632(6) 0.5654(2) 0.9602(4) 0.0439(17) Uani 1 1 d . U . . .
N7 N 0.6227(6) 0.5393(2) 0.7418(5) 0.0514(18) Uani 1 1 d . U . . .
N8 N 0.4071(6) 0.5797(2) 0.5366(5) 0.0519(18) Uani 1 1 d . U . . .
N13 N 0.0415(13) 0.5362(5) 0.5369(10) 0.144(4) Uani 0.5 1 d . U P A 1
O1 O 0.5247(5) 0.63849(19) 0.4897(3) 0.0462(15) Uani 1 1 d . U . . .
O2 O 0.7242(4) 0.59768(18) 0.6843(3) 0.0418(14) Uani 1 1 d . U . . .
O3 O 0.5698(4) 0.62324(16) 0.7065(3) 0.0320(12) Uani 1 1 d . U . . .
O4 O 0.7915(4) 0.57222(18) 0.8437(3) 0.0418(14) Uani 1 1 d . U . . .
O5 O 0.5134(4) 0.60927(17) 0.8248(3) 0.0349(12) Uani 1 1 d . U . . .
O6 O 0.5688(4) 0.58137(17) 0.9480(3) 0.0369(13) Uani 1 1 d . U . . .
O7 O 0.4278(4) 0.53302(17) 0.8546(3) 0.0425(14) Uani 1 1 d . U . . .
O8 O 0.3177(4) 0.63336(16) 0.7583(3) 0.0322(12) Uani 1 1 d . U . . .
O9 O 0.2130(4) 0.58109(17) 0.6809(3) 0.0393(13) Uani 1 1 d . U . . .
O10 O 0.4767(5) 0.70228(18) 0.5623(3) 0.0472(15) Uani 1 1 d . U . . .
O11 O 0.5246(5) 0.71073(18) 0.6800(3) 0.0439(14) Uani 1 1 d . U . . .
O12 O 0.1919(4) 0.69622(17) 0.6997(3) 0.0406(14) Uani 1 1 d . U . . .
O13 O 0.3465(4) 0.71464(16) 0.7191(3) 0.0394(13) Uani 1 1 d . U . . .
O14 O 0.4470(4) 0.68738(17) 0.8622(3) 0.0378(13) Uani 1 1 d . U . . .
O15 O 0.3927(4) 0.63934(17) 0.9182(3) 0.0389(13) Uani 1 1 d . U . . .
O16 O 0.6295(4) 0.68706(17) 0.8188(3) 0.0362(13) Uani 1 1 d . U . . .
O17 O 0.7520(4) 0.65063(18) 0.8041(3) 0.0413(14) Uani 1 1 d . U . . .
O18 O 0.0870(4) 0.64013(19) 0.5930(3) 0.0460(15) Uani 1 1 d . U . . .
O19 O 0.3159(4) 0.65197(18) 0.4972(3) 0.0408(14) Uani 1 1 d . U . . .
O20 O 0.3830(4) 0.64528(17) 0.6320(3) 0.0333(12) Uani 1 1 d . U . . .
C1 C 0.6093(7) 0.6223(3) 0.4934(5) 0.0405(18) Uani 1 1 d . U . . .
C2 C 0.6359(8) 0.6175(3) 0.4306(5) 0.052(2) Uani 1 1 d . U . . .
H2 H 0.5938 0.6265 0.3878 0.062 Uiso 1 1 calc R U . . .
C3 C 0.7219(8) 0.6001(3) 0.4298(6) 0.059(2) Uani 1 1 d . U . . .
H3 H 0.7372 0.5978 0.3868 0.071 Uiso 1 1 calc R U . . .
C4 C 0.7846(8) 0.5862(3) 0.4908(6) 0.052(2) Uani 1 1 d . U . . .
H4 H 0.8427 0.5743 0.4901 0.063 Uiso 1 1 calc R U . . .
C5 C 0.7608(7) 0.5900(3) 0.5546(5) 0.043(2) Uani 1 1 d . U . . .
H5 H 0.8037 0.5805 0.5967 0.052 Uiso 1 1 calc R U . . .
C6 C 0.6741(6) 0.6077(3) 0.5570(5) 0.0378(18) Uani 1 1 d . U . . .
C7 C 0.6570(6) 0.6104(2) 0.6284(5) 0.0335(17) Uani 1 1 d . U . . .
C8 C 0.8057(6) 0.5656(2) 0.9136(5) 0.0370(18) Uani 1 1 d . U . . .
C9 C 0.8975(7) 0.5504(3) 0.9530(5) 0.046(2) Uani 1 1 d . U . . .
H9 H 0.9445 0.5458 0.9295 0.055 Uiso 1 1 calc R U . . .
C10 C 0.9196(7) 0.5423(3) 1.0251(6) 0.056(3) Uani 1 1 d . U . . .
H10 H 0.9811 0.5328 1.0499 0.068 Uiso 1 1 calc R U . . .
C11 C 0.8508(7) 0.5481(3) 1.0596(6) 0.057(3) Uani 1 1 d . U . . .
H11 H 0.8650 0.5422 1.1080 0.068 Uiso 1 1 calc R U . . .
C12 C 0.7592(7) 0.5628(3) 1.0228(5) 0.045(2) Uani 1 1 d . U . . .
H12 H 0.7133 0.5672 1.0473 0.054 Uiso 1 1 calc R U . . .
C13 C 0.7352(6) 0.5710(3) 0.9496(5) 0.0362(18) Uani 1 1 d . U . . .
C14 C 0.6335(6) 0.5845(2) 0.9141(4) 0.0325(17) Uani 1 1 d . U . . .
C15 C 0.3522(7) 0.5124(3) 0.8177(5) 0.0417(19) Uani 1 1 d . U . . .
C16 C 0.3509(8) 0.4718(3) 0.8288(6) 0.051(2) Uani 1 1 d . U . . .
H16 H 0.4018 0.4602 0.8639 0.062 Uiso 1 1 calc R U . . .
C17 C 0.2767(9) 0.4492(3) 0.7894(6) 0.063(3) Uani 1 1 d . U . . .
H17 H 0.2774 0.4225 0.7991 0.076 Uiso 1 1 calc R U . . .
C18 C 0.2000(9) 0.4644(3) 0.7353(6) 0.065(3) Uani 1 1 d . U . . .
H18 H 0.1499 0.4486 0.7083 0.078 Uiso 1 1 calc R U . . .
C19 C 0.2010(8) 0.5041(3) 0.7229(6) 0.055(2) Uani 1 1 d . U . . .
H19 H 0.1506 0.5149 0.6864 0.066 Uiso 1 1 calc R U . . .
C20 C 0.2748(7) 0.5288(3) 0.7631(5) 0.0394(19) Uani 1 1 d . U . . .
C21 C 0.2707(6) 0.5699(2) 0.7421(5) 0.0335(17) Uani 1 1 d . U . . .
C22 C 0.0722(7) 0.6465(3) 0.5235(5) 0.044(2) Uani 1 1 d . U . . .
C23 C -0.0250(7) 0.6481(3) 0.4807(5) 0.061(3) Uani 1 1 d . U . . .
H23 H -0.0753 0.6436 0.5011 0.073 Uiso 1 1 calc R U . . .
C24 C -0.0467(8) 0.6564(4) 0.4087(6) 0.076(3) Uani 1 1 d . U . . .
H24 H -0.1114 0.6574 0.3805 0.091 Uiso 1 1 calc R U . . .
C25 C 0.0288(9) 0.6633(4) 0.3783(6) 0.082(3) Uani 1 1 d . U . . .
H25 H 0.0147 0.6698 0.3301 0.098 Uiso 1 1 calc R U . . .
C26 C 0.1241(8) 0.6605(4) 0.4202(5) 0.066(3) Uani 1 1 d . U . . .
H26 H 0.1742 0.6644 0.3994 0.080 Uiso 1 1 calc R U . . .
C27 C 0.1478(7) 0.6520(3) 0.4934(5) 0.046(2) Uani 1 1 d . U . . .
C28 C 0.2535(6) 0.6506(3) 0.5336(5) 0.0395(19) Uani 1 1 d . U . . .
C29 C 0.4982(7) 0.7239(3) 0.6188(5) 0.0415(19) Uani 1 1 d . U . . .
C30 C 0.4944(8) 0.7673(3) 0.6065(5) 0.049(2) Uani 1 1 d . U . . .
C31 C 0.4625(8) 0.7831(3) 0.5392(6) 0.061(2) Uani 1 1 d . U . . .
H31 H 0.4464 0.7666 0.4997 0.073 Uiso 1 1 calc R U . . .
C32 C 0.4537(10) 0.8231(3) 0.5290(7) 0.073(3) Uani 1 1 d . U . . .
H32 H 0.4310 0.8335 0.4831 0.088 Uiso 1 1 calc R U . . .
C33 C 0.4785(10) 0.8467(4) 0.5868(8) 0.081(3) Uani 1 1 d . U . . .
H33 H 0.4737 0.8736 0.5806 0.098 Uiso 1 1 calc R U . . .
C34 C 0.5106(10) 0.8315(4) 0.6541(7) 0.082(3) Uani 1 1 d . U . . .
H34 H 0.5258 0.8483 0.6932 0.098 Uiso 1 1 calc R U . . .
C35 C 0.5211(9) 0.7916(3) 0.6656(6) 0.064(3) Uani 1 1 d . U . . .
H35 H 0.5454 0.7815 0.7116 0.077 Uiso 1 1 calc R U . . .
C36 C 0.2600(6) 0.7222(3) 0.7171(5) 0.0371(18) Uani 1 1 d . U . . .
C37 C 0.2313(7) 0.7626(3) 0.7305(5) 0.0391(19) Uani 1 1 d . U . . .
C38 C 0.2872(7) 0.7934(3) 0.7233(5) 0.047(2) Uani 1 1 d . U . . .
H38 H 0.3439 0.7893 0.7100 0.056 Uiso 1 1 calc R U . . .
C39 C 0.2605(8) 0.8308(3) 0.7355(6) 0.059(3) Uani 1 1 d . U . . .
H39 H 0.2992 0.8519 0.7309 0.071 Uiso 1 1 calc R U . . .
C40 C 0.1761(9) 0.8369(3) 0.7545(6) 0.064(3) Uani 1 1 d . U . . .
H40 H 0.1563 0.8621 0.7611 0.077 Uiso 1 1 calc R U . . .
C41 C 0.1217(8) 0.8054(3) 0.7635(6) 0.060(2) Uani 1 1 d . U . . .
H41 H 0.0665 0.8093 0.7787 0.071 Uiso 1 1 calc R U . . .
C42 C 0.1479(7) 0.7685(3) 0.7504(5) 0.050(2) Uani 1 1 d . U . . .
H42 H 0.1093 0.7473 0.7549 0.060 Uiso 1 1 calc R U . . .
C43 C 0.3972(6) 0.6746(3) 0.9004(5) 0.0373(18) Uani 1 1 d . U . . .
C44 C 0.3376(6) 0.7034(3) 0.9288(5) 0.0382(19) Uani 1 1 d . U . . .
C45 C 0.3407(8) 0.7425(3) 0.9147(5) 0.052(2) Uani 1 1 d . U . . .
H45 H 0.3834 0.7517 0.8905 0.062 Uiso 1 1 calc R U . . .
C46 C 0.2791(9) 0.7688(3) 0.9368(6) 0.063(3) Uani 1 1 d . U . . .
H46 H 0.2820 0.7954 0.9280 0.076 Uiso 1 1 calc R U . . .
C47 C 0.2162(9) 0.7550(4) 0.9705(6) 0.068(3) Uani 1 1 d . U . . .
H47 H 0.1743 0.7723 0.9837 0.082 Uiso 1 1 calc R U . . .
C48 C 0.2127(8) 0.7169(4) 0.9855(6) 0.065(3) Uani 1 1 d . U . . .
H48 H 0.1696 0.7081 1.0098 0.078 Uiso 1 1 calc R U . . .
C49 C 0.2738(7) 0.6902(3) 0.9648(5) 0.050(2) Uani 1 1 d . U . . .
H49 H 0.2713 0.6638 0.9753 0.060 Uiso 1 1 calc R U . . .
C50 C 0.7179(6) 0.6825(3) 0.8193(4) 0.0355(18) Uani 1 1 d . U . . .
C51 C 0.7856(7) 0.7161(3) 0.8370(5) 0.0403(19) Uani 1 1 d . U . . .
C52 C 0.7570(8) 0.7514(3) 0.8559(5) 0.053(2) Uani 1 1 d . U . . .
H52 H 0.6931 0.7553 0.8569 0.063 Uiso 1 1 calc R U . . .
C53 C 0.8253(8) 0.7820(3) 0.8736(6) 0.059(3) Uani 1 1 d . U . . .
H53 H 0.8065 0.8062 0.8868 0.071 Uiso 1 1 calc R U . . .
C54 C 0.9187(8) 0.7764(3) 0.8718(6) 0.062(3) Uani 1 1 d . U . . .
H54 H 0.9637 0.7967 0.8840 0.075 Uiso 1 1 calc R U . . .
C55 C 0.9459(8) 0.7414(3) 0.8523(5) 0.053(2) Uani 1 1 d . U . . .
H55 H 1.0093 0.7380 0.8496 0.063 Uiso 1 1 calc R U . . .
C56 C 0.8819(7) 0.7110(3) 0.8364(5) 0.047(2) Uani 1 1 d . U . . .
H56 H 0.9027 0.6867 0.8251 0.056 Uiso 1 1 calc R U . . .
C57 C 0.2694(7) 0.5720(3) 0.9545(6) 0.053(2) Uani 1 1 d . U . . .
H57 H 0.2348 0.5889 0.9188 0.063 Uiso 1 1 calc R U . . .
C58 C 0.2210(9) 0.5553(3) 0.9980(7) 0.068(3) Uani 1 1 d . U . . .
H58 H 0.1550 0.5603 0.9910 0.082 Uiso 1 1 calc R U . . .
C59 C 0.2716(9) 0.5312(3) 1.0520(6) 0.066(3) Uani 1 1 d . U . . .
H59 H 0.2406 0.5198 1.0829 0.079 Uiso 1 1 calc R U . . .
C60 C 0.3679(9) 0.5240(3) 1.0601(6) 0.068(3) Uani 1 1 d . U . . .
H60 H 0.4039 0.5079 1.0968 0.081 Uiso 1 1 calc R U . . .
C61 C 0.4109(8) 0.5409(3) 1.0125(5) 0.049(2) Uani 1 1 d . U . . .
H61 H 0.4759 0.5352 1.0170 0.058 Uiso 1 1 calc R U . . .
C62 C 0.0258(7) 0.6076(3) 0.7228(5) 0.049(2) Uani 1 1 d . U . . .
H62 H 0.0111 0.5963 0.6776 0.059 Uiso 1 1 calc R U . . .
C63 C -0.0338(8) 0.5991(3) 0.7652(6) 0.058(3) Uani 1 1 d . U . . .
H63 H -0.0878 0.5829 0.7485 0.069 Uiso 1 1 calc R U . . .
C64 C -0.0118(7) 0.6149(3) 0.8320(6) 0.054(2) Uani 1 1 d . U . . .
H64 H -0.0497 0.6094 0.8623 0.065 Uiso 1 1 calc R U . . .
C65 C 0.0678(7) 0.6392(3) 0.8537(5) 0.051(2) Uani 1 1 d . U . . .
H65 H 0.0846 0.6504 0.8991 0.061 Uiso 1 1 calc R U . . .
C66 C 0.1223(7) 0.6469(3) 0.8076(5) 0.042(2) Uani 1 1 d . U . . .
H66 H 0.1750 0.6639 0.8224 0.051 Uiso 1 1 calc R U . . .
C67 C 0.5312(9) 0.5319(4) 0.7266(6) 0.070(2) Uani 1 1 d . U . . .
H67 H 0.4898 0.5525 0.7289 0.084 Uiso 1 1 calc R U . . .
C68 C 0.4890(10) 0.4954(4) 0.7072(7) 0.079(3) Uani 1 1 d . U . . .
H68 H 0.4215 0.4922 0.6932 0.095 Uiso 1 1 calc R U . . .
C69 C 0.5485(13) 0.4654(5) 0.7092(9) 0.117(4) Uani 1 1 d . U . . .
H69 H 0.5233 0.4403 0.6995 0.141 Uiso 1 1 calc R U . . .
C70 C 0.6431(14) 0.4714(5) 0.7251(9) 0.124(4) Uani 1 1 d . U . . .
H70 H 0.6855 0.4509 0.7245 0.149 Uiso 1 1 calc R U . . .
C71 C 0.6798(11) 0.5100(4) 0.7434(8) 0.095(3) Uani 1 1 d . U . . .
H71 H 0.7470 0.5141 0.7568 0.114 Uiso 1 1 calc R U . . .
C72 C 0.3556(9) 0.5616(3) 0.5706(7) 0.070(2) Uani 1 1 d . U . . .
H72 H 0.3422 0.5749 0.6082 0.084 Uiso 1 1 calc R U . . .
C73 C 0.3182(11) 0.5243(4) 0.5567(9) 0.097(3) Uani 1 1 d . U . . .
H73 H 0.2812 0.5134 0.5839 0.116 Uiso 1 1 calc R U . . .
C74 C 0.3357(12) 0.5053(5) 0.5056(9) 0.109(4) Uani 1 1 d . U . . .
H74 H 0.3116 0.4801 0.4952 0.131 Uiso 1 1 calc R U . . .
C75 C 0.3896(13) 0.5220(5) 0.4664(9) 0.115(4) Uani 1 1 d . U . . .
H75 H 0.4054 0.5081 0.4303 0.138 Uiso 1 1 calc R U . . .
C76 C 0.4205(10) 0.5605(4) 0.4821(7) 0.084(3) Uani 1 1 d . U . . .
H76 H 0.4519 0.5730 0.4527 0.101 Uiso 1 1 calc R U . . .
C77 C 0.9183(9) 0.7035(3) 0.6296(6) 0.067(3) Uani 1 1 d . U . . .
H77 H 0.9673 0.6887 0.6196 0.080 Uiso 1 1 calc R U . . .
C78 C 0.8401(9) 0.6858(4) 0.6447(6) 0.064(2) Uani 1 1 d . U . . .
H78 H 0.8347 0.6587 0.6444 0.077 Uiso 1 1 calc R U . . .
C79 C 0.7711(8) 0.7084(3) 0.6601(6) 0.061(2) Uani 1 1 d . U . . .
H79 H 0.7168 0.6971 0.6693 0.074 Uiso 1 1 calc R U . . .
C80 C 0.7819(9) 0.7475(4) 0.6619(6) 0.068(3) Uani 1 1 d . U . . .
H80 H 0.7349 0.7630 0.6728 0.082 Uiso 1 1 calc R U . . .
C81 C 0.8599(9) 0.7647(4) 0.6482(7) 0.070(3) Uani 1 1 d . U . . .
H81 H 0.8686 0.7917 0.6521 0.084 Uiso 1 1 calc R U . . .
C82 C 0.1206(10) 0.7501(4) 0.5490(7) 0.074(3) Uani 1 1 d . U . . .
H82 H 0.1174 0.7233 0.5561 0.089 Uiso 1 1 calc R U . . .
C83 C 0.1838(12) 0.7657(5) 0.5154(8) 0.102(4) Uani 1 1 d . U . . .
H83 H 0.2259 0.7499 0.4992 0.122 Uiso 1 1 calc R U . . .
C84 C 0.1830(12) 0.8050(5) 0.5063(8) 0.098(4) Uani 1 1 d . U . . .
H84 H 0.2257 0.8160 0.4838 0.118 Uiso 1 1 calc R U . . .
C85 C 0.1231(11) 0.8285(5) 0.5285(8) 0.091(4) Uani 1 1 d . U . . .
H85 H 0.1232 0.8554 0.5211 0.110 Uiso 1 1 calc R U . . .
C86 C 0.0604(9) 0.8117(4) 0.5633(7) 0.076(3) Uani 1 1 d . U . . .
H86 H 0.0173 0.8263 0.5805 0.091 Uiso 1 1 calc R U . . .
C87 C 0.572(2) 0.3781(7) 0.8256(16) 0.192(6) Uani 1 1 d . U . . .
H87 H 0.5177 0.3858 0.8388 0.230 Uiso 1 1 calc R U . . .
C88 C 0.646(2) 0.3746(8) 0.8706(17) 0.208(6) Uani 1 1 d . U . . .
H88 H 0.6481 0.3776 0.9184 0.250 Uiso 1 1 calc R U . . .
C89 C 0.736(2) 0.3652(8) 0.8507(17) 0.208(6) Uani 1 1 d . U . . .
H89 H 0.7974 0.3626 0.8837 0.250 Uiso 1 1 calc R U . . .
C90 C 0.719(2) 0.3609(8) 0.7790(18) 0.221(6) Uani 1 1 d . U . . .
H90 H 0.7745 0.3534 0.7665 0.265 Uiso 1 1 calc R U . . .
C91 C 0.639(2) 0.3651(7) 0.7213(16) 0.192(5) Uani 1 1 d . U . . .
H91 H 0.6347 0.3640 0.6729 0.230 Uiso 1 1 calc R U . . .
C92 C 0.8671(16) 0.4374(8) 0.6488(14) 0.309(8) Uani 1 1 d D U . . .
H92 H 0.8425 0.4216 0.6088 0.371 Uiso 1 1 calc R U . . .
C93 C 0.8835(17) 0.4221(6) 0.7166(18) 0.292(7) Uani 1 1 d D U . . .
H93 H 0.8697 0.3960 0.7221 0.350 Uiso 1 1 calc R U . . .
C94 C 0.9197(18) 0.4449(9) 0.7759(12) 0.300(8) Uani 1 1 d D U . . .
H94 H 0.9305 0.4342 0.8214 0.360 Uiso 1 1 calc R U . . .
C95 C 0.9401(17) 0.4835(8) 0.7683(13) 0.271(7) Uani 1 1 d D U . . .
H95 H 0.9655 0.4990 0.8085 0.326 Uiso 1 1 calc R U . . .
C96 C 0.9229(17) 0.4992(6) 0.7009(18) 0.302(8) Uani 1 1 d D U . . .
H96 H 0.9354 0.5255 0.6958 0.363 Uiso 1 1 calc R U . . .
C97 C 0.0486(16) 0.5324(7) 0.4680(11) 0.176(6) Uani 1 1 d D U . . .
H97 H 0.0714 0.5514 0.4429 0.211 Uiso 1 1 calc R U . A 1
C98 C 0.0415(13) 0.5362(5) 0.5369(10) 0.144(4) Uani 0.5 1 d D U P A 2
H98 H 0.0717 0.5567 0.5664 0.172 Uiso 0.5 1 calc R U P A 2
C99 C -0.0127(14) 0.5082(6) 0.5599(11) 0.167(6) Uani 1 1 d D U . . .
H99 H -0.0306 0.5156 0.6002 0.200 Uiso 1 1 calc R U . A 1
 
loop_
 _atom_site_aniso_label
 _atom_site_aniso_U_11
 _atom_site_aniso_U_22
 _atom_site_aniso_U_33
 _atom_site_aniso_U_23
 _atom_site_aniso_U_13
 _atom_site_aniso_U_12
N9 0.065(5) 0.062(5) 0.063(5) 0.016(4) 0.013(4) -0.015(5)
N11 0.064(5) 0.067(5) 0.064(4) 0.008(4) 0.008(4) -0.010(4)
N12 0.322(14) 0.237(14) 0.303(14) -0.008(13) -0.049(13) -0.006(14)
N22 0.180(9) 0.160(8) 0.199(10) -0.022(9) 0.011(9) -0.017(8)
Dy1 0.0257(2) 0.0350(2) 0.0351(2) 0.00266(19) 0.01130(16) 0.00119(19)
Fe1 0.0262(6) 0.0383(7) 0.0315(7) 0.0068(5) 0.0096(5) 0.0010(5)
Fe2 0.0255(6) 0.0342(7) 0.0361(7) 0.0060(5) 0.0110(5) 0.0041(5)
Fe3 0.0225(6) 0.0381(7) 0.0314(7) 0.0029(5) 0.0069(5) -0.0013(5)
Fe4 0.0310(7) 0.0395(7) 0.0308(7) 0.0038(5) 0.0129(5) 0.0017(6)
N1 0.031(3) 0.038(3) 0.039(3) 0.005(3) 0.018(3) 0.001(3)
N2 0.024(3) 0.040(3) 0.037(3) 0.008(3) 0.013(3) 0.005(3)
N3 0.031(3) 0.033(3) 0.035(3) 0.001(3) 0.012(3) 0.001(3)
N4 0.024(3) 0.043(3) 0.035(3) 0.004(3) 0.009(3) -0.001(3)
N5 0.027(3) 0.043(4) 0.042(4) 0.004(3) 0.017(3) -0.003(3)
N6 0.040(4) 0.050(4) 0.046(4) 0.011(3) 0.020(3) 0.005(3)
N7 0.042(4) 0.049(4) 0.063(4) 0.001(3) 0.015(3) 0.005(3)
N8 0.053(4) 0.051(4) 0.057(4) -0.004(3) 0.023(3) -0.007(3)
N13 0.129(7) 0.140(7) 0.138(7) 0.004(7) 0.000(7) 0.001(6)
O1 0.046(3) 0.055(3) 0.044(3) 0.010(3) 0.025(3) 0.009(3)
O2 0.038(3) 0.048(3) 0.044(3) 0.005(3) 0.020(3) 0.009(3)
O3 0.029(3) 0.043(3) 0.031(3) 0.003(2) 0.020(2) 0.004(2)
O4 0.031(3) 0.053(3) 0.044(3) 0.016(3) 0.015(3) 0.012(3)
O5 0.026(3) 0.044(3) 0.036(3) 0.010(2) 0.011(2) 0.006(2)
O6 0.034(3) 0.045(3) 0.033(3) 0.009(2) 0.012(2) -0.001(3)
O7 0.039(3) 0.038(3) 0.049(3) 0.006(3) 0.010(3) 0.001(3)
O8 0.028(3) 0.036(3) 0.035(3) 0.007(2) 0.012(2) 0.002(2)
O9 0.038(3) 0.040(3) 0.039(3) -0.001(2) 0.009(2) -0.007(2)
O10 0.053(3) 0.049(3) 0.043(3) 0.007(3) 0.018(3) 0.008(3)
O11 0.045(3) 0.049(3) 0.042(3) 0.008(3) 0.019(3) -0.006(3)
O12 0.034(3) 0.040(3) 0.046(3) 0.009(3) 0.008(2) 0.005(3)
O13 0.031(3) 0.034(3) 0.055(3) 0.003(3) 0.015(3) 0.003(2)
O14 0.038(3) 0.041(3) 0.040(3) -0.005(2) 0.020(2) -0.004(3)
O15 0.039(3) 0.039(3) 0.043(3) -0.001(3) 0.017(3) -0.001(3)
O16 0.027(3) 0.042(3) 0.040(3) 0.002(2) 0.011(2) -0.006(2)
O17 0.031(3) 0.044(3) 0.050(3) -0.007(3) 0.014(3) 0.002(3)
O18 0.030(3) 0.065(4) 0.041(3) 0.006(3) 0.009(3) -0.004(3)
O19 0.035(3) 0.053(3) 0.036(3) 0.008(3) 0.013(3) -0.001(3)
O20 0.024(3) 0.044(3) 0.031(3) 0.001(2) 0.008(2) 0.001(2)
C1 0.042(4) 0.044(4) 0.044(4) 0.000(3) 0.028(3) -0.005(3)
C2 0.053(5) 0.060(5) 0.049(5) 0.004(4) 0.027(4) 0.002(4)
C3 0.061(5) 0.067(6) 0.059(5) -0.004(5) 0.034(5) 0.001(5)
C4 0.049(5) 0.058(5) 0.064(5) -0.009(4) 0.040(4) 0.004(4)
C5 0.041(4) 0.047(4) 0.047(4) -0.003(4) 0.023(4) -0.003(4)
C6 0.037(4) 0.037(4) 0.046(4) 0.003(3) 0.022(3) -0.006(3)
C7 0.030(3) 0.033(3) 0.042(4) -0.001(3) 0.018(3) -0.006(3)
C8 0.028(4) 0.036(4) 0.045(4) 0.012(3) 0.007(3) 0.001(3)
C9 0.036(4) 0.051(5) 0.048(5) 0.006(4) 0.009(4) 0.009(4)
C10 0.035(5) 0.066(5) 0.060(5) 0.014(5) 0.002(4) 0.012(4)
C11 0.045(5) 0.064(5) 0.054(5) 0.009(5) 0.004(4) 0.005(5)
C12 0.036(4) 0.054(5) 0.046(4) 0.008(4) 0.012(4) 0.008(4)
C13 0.029(4) 0.041(4) 0.037(4) 0.008(3) 0.006(3) 0.005(3)
C14 0.029(4) 0.034(4) 0.036(4) 0.000(3) 0.012(3) 0.004(3)
C15 0.048(4) 0.033(4) 0.047(4) 0.006(3) 0.019(3) 0.002(3)
C16 0.060(5) 0.034(4) 0.059(5) 0.012(4) 0.016(4) 0.001(4)
C17 0.074(6) 0.038(5) 0.077(6) 0.002(5) 0.022(5) -0.006(5)
C18 0.067(6) 0.046(5) 0.076(6) -0.006(5) 0.009(5) -0.006(5)
C19 0.053(5) 0.044(4) 0.062(5) -0.003(4) 0.008(4) -0.007(4)
C20 0.044(4) 0.036(4) 0.042(4) -0.001(3) 0.017(3) -0.004(3)
C21 0.032(4) 0.031(4) 0.038(4) 0.002(3) 0.011(3) -0.002(3)
C22 0.035(4) 0.056(4) 0.039(4) 0.005(4) 0.007(3) -0.004(4)
C23 0.037(5) 0.094(6) 0.046(5) 0.005(5) 0.003(4) -0.010(5)
C24 0.044(5) 0.120(7) 0.056(5) 0.014(5) 0.003(5) -0.007(5)
C25 0.054(6) 0.128(7) 0.053(5) 0.017(6) 0.001(5) -0.005(6)
C26 0.043(5) 0.107(6) 0.045(5) 0.013(5) 0.007(4) -0.011(5)
C27 0.036(4) 0.066(5) 0.031(4) 0.007(4) 0.003(3) 0.000(4)
C28 0.031(4) 0.049(4) 0.035(4) 0.006(3) 0.005(3) -0.007(3)
C29 0.036(4) 0.051(4) 0.045(4) 0.009(4) 0.023(3) 0.000(3)
C30 0.057(5) 0.043(5) 0.052(5) 0.004(4) 0.024(4) -0.004(4)
C31 0.076(5) 0.047(5) 0.059(5) 0.009(4) 0.020(5) -0.002(5)
C32 0.095(7) 0.046(5) 0.071(6) 0.018(5) 0.011(5) 0.003(5)
C33 0.102(7) 0.045(6) 0.092(7) 0.009(5) 0.020(6) 0.004(6)
C34 0.106(7) 0.062(6) 0.079(6) -0.013(5) 0.030(6) -0.004(6)
C35 0.076(6) 0.056(5) 0.061(5) -0.005(5) 0.021(5) -0.002(5)
C36 0.029(4) 0.042(4) 0.037(4) 0.012(3) 0.003(3) 0.001(3)
C37 0.041(4) 0.035(4) 0.040(4) 0.000(3) 0.011(3) 0.009(4)
C38 0.039(4) 0.045(4) 0.055(5) -0.004(4) 0.011(4) 0.003(4)
C39 0.058(5) 0.047(5) 0.064(5) -0.007(4) 0.002(5) -0.002(5)
C40 0.073(6) 0.053(5) 0.060(5) -0.011(5) 0.011(5) 0.017(5)
C41 0.057(5) 0.057(5) 0.066(5) -0.004(4) 0.020(4) 0.012(4)
C42 0.047(4) 0.049(4) 0.055(4) -0.001(4) 0.018(4) 0.010(4)
C43 0.032(4) 0.045(4) 0.034(4) -0.002(3) 0.010(3) -0.001(3)
C44 0.034(4) 0.047(4) 0.031(4) -0.009(4) 0.006(3) 0.002(4)
C45 0.053(5) 0.052(4) 0.049(4) -0.009(4) 0.012(4) 0.006(4)
C46 0.066(5) 0.064(5) 0.054(5) -0.010(5) 0.008(5) 0.014(5)
C47 0.054(6) 0.082(6) 0.061(6) -0.020(5) 0.007(5) 0.015(5)
C48 0.051(5) 0.084(6) 0.064(6) -0.018(5) 0.022(5) -0.002(5)
C49 0.041(4) 0.061(5) 0.050(4) -0.018(4) 0.015(4) -0.001(4)
C50 0.035(4) 0.049(4) 0.027(4) 0.004(3) 0.015(3) -0.001(3)
C51 0.041(4) 0.042(4) 0.042(4) -0.002(4) 0.018(4) -0.008(4)
C52 0.045(5) 0.053(5) 0.066(5) -0.012(4) 0.025(4) -0.004(4)
C53 0.059(5) 0.048(5) 0.073(6) -0.016(5) 0.022(5) -0.008(5)
C54 0.051(5) 0.061(6) 0.076(6) -0.012(5) 0.020(5) -0.018(5)
C55 0.042(5) 0.058(5) 0.064(5) -0.009(4) 0.025(4) -0.011(4)
C56 0.042(4) 0.044(4) 0.053(4) -0.011(4) 0.013(4) -0.009(4)
C57 0.048(4) 0.057(5) 0.058(5) 0.016(4) 0.023(4) 0.002(4)
C58 0.056(6) 0.070(6) 0.085(6) 0.010(5) 0.032(5) -0.005(5)
C59 0.070(6) 0.065(6) 0.076(6) 0.018(5) 0.042(5) -0.008(5)
C60 0.076(6) 0.061(6) 0.068(6) 0.018(5) 0.024(5) -0.001(5)
C61 0.049(5) 0.047(5) 0.053(5) 0.015(4) 0.020(4) 0.008(4)
C62 0.037(4) 0.066(5) 0.048(4) -0.009(4) 0.018(4) -0.015(4)
C63 0.044(5) 0.070(6) 0.064(6) -0.001(5) 0.023(5) -0.019(5)
C64 0.040(5) 0.063(6) 0.065(6) 0.015(5) 0.023(4) -0.001(4)
C65 0.038(5) 0.071(5) 0.050(5) 0.003(4) 0.022(4) 0.004(4)
C66 0.031(4) 0.052(4) 0.044(4) 0.000(4) 0.011(3) -0.004(4)
C67 0.064(5) 0.066(5) 0.082(5) -0.018(4) 0.026(4) -0.008(4)
C68 0.079(5) 0.071(5) 0.090(5) -0.011(5) 0.029(5) -0.014(5)
C69 0.115(7) 0.092(7) 0.134(7) -0.009(6) 0.018(7) -0.008(7)
C70 0.118(7) 0.082(7) 0.148(7) -0.012(7) 0.002(7) 0.011(7)
C71 0.083(6) 0.075(6) 0.111(6) -0.010(5) 0.003(5) 0.001(5)
C72 0.075(5) 0.059(5) 0.081(5) -0.006(4) 0.030(4) -0.007(4)
C73 0.105(6) 0.081(6) 0.112(7) -0.007(6) 0.042(6) -0.031(6)
C74 0.122(8) 0.092(7) 0.115(8) -0.018(7) 0.037(7) -0.040(7)
C75 0.139(8) 0.092(7) 0.118(8) -0.029(7) 0.045(7) -0.034(7)
C76 0.096(6) 0.071(5) 0.090(6) -0.015(5) 0.035(5) -0.027(5)
C77 0.067(6) 0.061(6) 0.072(6) -0.003(5) 0.020(5) -0.002(5)
C78 0.063(5) 0.060(5) 0.067(5) 0.002(4) 0.015(4) -0.012(5)
C79 0.053(5) 0.067(5) 0.061(5) 0.008(4) 0.012(4) -0.010(4)
C80 0.061(5) 0.076(6) 0.068(5) 0.003(5) 0.019(5) 0.010(5)
C81 0.069(6) 0.057(6) 0.079(6) 0.001(5) 0.012(6) 0.009(5)
C82 0.078(5) 0.076(5) 0.070(5) -0.004(5) 0.021(5) -0.001(5)
C83 0.105(8) 0.116(8) 0.092(7) -0.010(7) 0.042(6) -0.009(7)
C84 0.102(8) 0.112(8) 0.083(7) 0.019(7) 0.033(6) -0.012(7)
C85 0.086(7) 0.093(7) 0.084(7) 0.027(6) 0.009(6) -0.005(6)
C86 0.067(5) 0.079(6) 0.073(5) 0.007(5) 0.006(5) 0.003(5)
C87 0.183(10) 0.165(9) 0.194(11) -0.017(10) 0.002(10) -0.013(9)
C88 0.192(12) 0.177(10) 0.217(12) -0.025(10) -0.002(11) -0.002(11)
C89 0.190(11) 0.182(10) 0.217(12) -0.026(11) 0.001(12) -0.002(10)
C90 0.213(11) 0.185(10) 0.221(11) -0.024(10) -0.007(11) 0.006(10)
C91 0.178(10) 0.157(8) 0.209(10) -0.033(9) 0.007(9) 0.003(9)
C92 0.319(14) 0.227(14) 0.297(15) -0.006(14) -0.044(14) 0.000(14)
C93 0.299(13) 0.221(13) 0.276(14) -0.006(12) -0.041(13) 0.006(12)
C94 0.308(14) 0.222(14) 0.284(15) -0.008(13) -0.047(14) -0.001(14)
C95 0.275(12) 0.204(12) 0.261(13) -0.006(12) -0.040(12) 0.000(12)
C96 0.309(14) 0.227(14) 0.288(15) -0.019(13) -0.045(14) -0.010(13)
C97 0.163(10) 0.165(10) 0.168(10) -0.008(10) -0.004(10) 0.001(9)
C98 0.129(7) 0.140(7) 0.138(7) 0.004(7) 0.000(7) 0.001(6)
C99 0.140(10) 0.143(10) 0.179(10) -0.003(10) -0.015(9) -0.021(9)
 
_geom_special_details
;
 All esds (except the esd in the dihedral angle between two l.s. planes)
 are estimated using the full covariance matrix.  The cell esds are taken
 into account individually in the estimation of esds in distances, angles
 and torsion angles; correlations between esds in cell parameters are only
 used when they are defined by crystal symmetry.  An approximate (isotropic)
 treatment of cell esds is used for estimating esds involving l.s. planes.
;
 
loop_
 _geom_bond_atom_site_label_1
 _geom_bond_atom_site_label_2
 _geom_bond_distance
 _geom_bond_site_symmetry_2
 _geom_bond_publ_flag
N9 C81 1.292(14) . ?
N9 C77 1.347(14) . ?
N11 C82 1.267(15) . ?
N11 C86 1.300(15) . ?
N12 C96 1.377(9) . ?
N12 C92 1.383(9) . ?
N22 C87 1.37(3) . ?
N22 C91 1.45(3) . ?
Dy1 O11 2.362(6) . ?
Dy1 O13 2.368(6) . ?
Dy1 O14 2.379(6) . ?
Dy1 O5 2.382(5) . ?
Dy1 O16 2.394(5) . ?
Dy1 O3 2.396(5) . ?
Dy1 O20 2.415(5) . ?
Dy1 O8 2.476(5) . ?
Fe1 O7 1.943(6) . ?
Fe1 O5 1.980(6) . ?
Fe1 O6 2.010(6) . ?
Fe1 O15 2.041(6) . ?
Fe1 N3 2.064(7) . ?
Fe1 N6 2.173(8) . ?
Fe2 O4 1.912(6) . ?
Fe2 O2 1.992(6) . ?
Fe2 O3 2.007(5) . ?
Fe2 O17 2.018(6) . ?
Fe2 N2 2.049(7) . ?
Fe2 N7 2.239(8) . ?
Fe3 O18 1.901(6) . ?
Fe3 O8 1.998(5) . ?
Fe3 O9 2.009(6) . ?
Fe3 O12 2.016(6) . ?
Fe3 N4 2.056(7) . ?
Fe3 N5 2.207(7) . ?
Fe4 O1 1.896(6) . ?
Fe4 O19 1.989(6) . ?
Fe4 O20 1.998(6) . ?
Fe4 O10 2.032(7) . ?
Fe4 N1 2.057(7) . ?
Fe4 N8 2.289(8) . ?
N1 C7 1.330(10) . ?
N1 O3 1.402(8) . ?
N2 C14 1.298(10) . ?
N2 O5 1.398(8) . ?
N3 C21 1.311(10) . ?
N3 O8 1.411(8) . ?
N4 C28 1.319(10) . ?
N4 O20 1.413(8) . ?
N5 C62 1.324(11) . ?
N5 C66 1.328(11) . ?
N6 C57 1.333(12) . ?
N6 C61 1.344(11) . ?
N7 C67 1.281(13) . ?
N7 C71 1.287(15) . ?
N8 C72 1.283(14) . ?
N8 C76 1.311(14) . ?
N13 C97 1.383(9) . ?
N13 C99 1.387(9) . ?
O1 C1 1.313(11) . ?
O2 C7 1.301(10) . ?
O4 C8 1.339(10) . ?
O6 C14 1.287(10) . ?
O7 C15 1.317(11) . ?
O9 C21 1.296(10) . ?
O10 C29 1.288(11) . ?
O11 C29 1.229(10) . ?
O12 C36 1.289(10) . ?
O13 C36 1.254(10) . ?
O14 C43 1.250(10) . ?
O15 C43 1.263(10) . ?
O16 C50 1.272(10) . ?
O17 C50 1.265(10) . ?
O18 C22 1.330(10) . ?
O19 C28 1.292(10) . ?
C1 C2 1.393(12) . ?
C1 C6 1.409(13) . ?
C2 C3 1.372(14) . ?
C3 C4 1.353(14) . ?
C4 C5 1.389(12) . ?
C5 C6 1.392(12) . ?
C6 C7 1.486(12) . ?
C8 C13 1.398(12) . ?
C8 C9 1.413(12) . ?
C9 C10 1.378(13) . ?
C10 C11 1.359(14) . ?
C11 C12 1.392(13) . ?
C12 C13 1.399(12) . ?
C13 C14 1.492(11) . ?
C15 C16 1.408(12) . ?
C15 C20 1.412(12) . ?
C16 C17 1.357(14) . ?
C17 C18 1.386(15) . ?
C18 C19 1.380(14) . ?
C19 C20 1.401(13) . ?
C20 C21 1.464(12) . ?
C22 C27 1.385(13) . ?
C22 C23 1.400(13) . ?
C23 C24 1.377(14) . ?
C24 C25 1.395(16) . ?
C25 C26 1.375(15) . ?
C26 C27 1.399(13) . ?
C27 C28 1.488(12) . ?
C29 C30 1.504(13) . ?
C30 C31 1.369(14) . ?
C30 C35 1.382(14) . ?
C31 C32 1.385(14) . ?
C32 C33 1.348(17) . ?
C33 C34 1.363(17) . ?
C34 C35 1.385(15) . ?
C36 C37 1.486(12) . ?
C37 C38 1.356(13) . ?
C37 C42 1.372(13) . ?
C38 C39 1.377(13) . ?
C39 C40 1.376(16) . ?
C40 C41 1.370(15) . ?
C41 C42 1.364(13) . ?
C43 C44 1.508(12) . ?
C44 C45 1.370(13) . ?
C44 C49 1.379(13) . ?
C45 C46 1.411(14) . ?
C46 C47 1.344(16) . ?
C47 C48 1.343(16) . ?
C48 C49 1.400(14) . ?
C50 C51 1.476(12) . ?
C51 C52 1.363(13) . ?
C51 C56 1.392(13) . ?
C52 C53 1.403(14) . ?
C53 C54 1.360(15) . ?
C54 C55 1.350(14) . ?
C55 C56 1.360(13) . ?
C57 C58 1.364(14) . ?
C58 C59 1.370(15) . ?
C59 C60 1.362(15) . ?
C60 C61 1.381(14) . ?
C62 C63 1.379(13) . ?
C63 C64 1.361(14) . ?
C64 C65 1.374(14) . ?
C65 C66 1.375(13) . ?
C67 C68 1.390(16) . ?
C68 C69 1.328(19) . ?
C69 C70 1.31(2) . ?
C70 C71 1.430(19) . ?
C72 C73 1.379(16) . ?
C73 C74 1.274(19) . ?
C74 C75 1.36(2) . ?
C75 C76 1.396(18) . ?
C77 C78 1.378(15) . ?
C78 C79 1.355(15) . ?
C79 C80 1.346(15) . ?
C80 C81 1.355(16) . ?
C82 C83 1.370(18) . ?
C83 C84 1.36(2) . ?
C84 C85 1.33(2) . ?
C85 C86 1.398(18) . ?
C87 C88 1.16(3) . ?
C88 C89 1.49(4) . ?
C89 C90 1.36(3) . ?
C90 C91 1.36(3) . ?
C92 C93 1.378(9) . ?
C93 C94 1.366(9) . ?
C94 C95 1.370(9) . ?
C95 C96 1.375(9) . ?
C97 C98 1.383(9) . ?
C97 C99 1.53(2) 3_566 ?
C98 C99 1.387(9) . ?
C99 C97 1.53(2) 3_566 ?
 
loop_
 _geom_angle_atom_site_label_1
 _geom_angle_atom_site_label_2
 _geom_angle_atom_site_label_3
 _geom_angle
 _geom_angle_site_symmetry_1
 _geom_angle_site_symmetry_3
 _geom_angle_publ_flag
C81 N9 C77 123.4(11) . . ?
C82 N11 C86 129.8(13) . . ?
C96 N12 C92 119.3(12) . . ?
C87 N22 C91 127(3) . . ?
O11 Dy1 O13 74.6(2) . . ?
O11 Dy1 O14 119.7(2) . . ?
O13 Dy1 O14 75.3(2) . . ?
O11 Dy1 O5 143.8(2) . . ?
O13 Dy1 O5 141.4(2) . . ?
O14 Dy1 O5 78.0(2) . . ?
O11 Dy1 O16 72.4(2) . . ?
O13 Dy1 O16 117.0(2) . . ?
O14 Dy1 O16 76.9(2) . . ?
O5 Dy1 O16 82.80(19) . . ?
O11 Dy1 O3 80.6(2) . . ?
O13 Dy1 O3 143.8(2) . . ?
O14 Dy1 O3 140.77(19) . . ?
O5 Dy1 O3 68.79(19) . . ?
O16 Dy1 O3 78.67(19) . . ?
O11 Dy1 O20 77.3(2) . . ?
O13 Dy1 O20 79.3(2) . . ?
O14 Dy1 O20 143.28(19) . . ?
O5 Dy1 O20 108.03(19) . . ?
O16 Dy1 O20 139.10(19) . . ?
O3 Dy1 O20 69.74(18) . . ?
O11 Dy1 O8 140.5(2) . . ?
O13 Dy1 O8 74.87(19) . . ?
O14 Dy1 O8 75.16(19) . . ?
O5 Dy1 O8 71.62(18) . . ?
O16 Dy1 O8 145.31(18) . . ?
O3 Dy1 O8 111.72(19) . . ?
O20 Dy1 O8 72.91(18) . . ?
O7 Fe1 O5 100.2(3) . . ?
O7 Fe1 O6 91.3(2) . . ?
O5 Fe1 O6 77.3(2) . . ?
O7 Fe1 O15 160.1(3) . . ?
O5 Fe1 O15 97.8(2) . . ?
O6 Fe1 O15 101.0(2) . . ?
O7 Fe1 N3 85.1(3) . . ?
O5 Fe1 N3 81.3(2) . . ?
O6 Fe1 N3 157.3(3) . . ?
O15 Fe1 N3 89.3(3) . . ?
O7 Fe1 N6 82.8(3) . . ?
O5 Fe1 N6 171.1(3) . . ?
O6 Fe1 N6 94.3(3) . . ?
O15 Fe1 N6 80.7(3) . . ?
N3 Fe1 N6 107.4(3) . . ?
O4 Fe2 O2 105.2(3) . . ?
O4 Fe2 O3 175.1(2) . . ?
O2 Fe2 O3 78.3(2) . . ?
O4 Fe2 O17 91.0(3) . . ?
O2 Fe2 O17 92.4(3) . . ?
O3 Fe2 O17 92.2(2) . . ?
O4 Fe2 N2 88.3(3) . . ?
O2 Fe2 N2 164.6(3) . . ?
O3 Fe2 N2 87.8(2) . . ?
O17 Fe2 N2 94.7(3) . . ?
O4 Fe2 N7 87.2(3) . . ?
O2 Fe2 N7 85.6(3) . . ?
O3 Fe2 N7 89.7(3) . . ?
O17 Fe2 N7 176.9(3) . . ?
N2 Fe2 N7 87.8(3) . . ?
O18 Fe3 O8 174.6(3) . . ?
O18 Fe3 O9 96.3(3) . . ?
O8 Fe3 O9 78.4(2) . . ?
O18 Fe3 O12 95.9(3) . . ?
O8 Fe3 O12 89.5(2) . . ?
O9 Fe3 O12 162.5(2) . . ?
O18 Fe3 N4 86.9(3) . . ?
O8 Fe3 N4 93.2(2) . . ?
O9 Fe3 N4 96.9(3) . . ?
O12 Fe3 N4 96.2(3) . . ?
O18 Fe3 N5 89.0(3) . . ?
O8 Fe3 N5 91.0(2) . . ?
O9 Fe3 N5 84.0(3) . . ?
O12 Fe3 N5 83.7(3) . . ?
N4 Fe3 N5 175.8(3) . . ?
O1 Fe4 O19 104.2(3) . . ?
O1 Fe4 O20 175.3(3) . . ?
O19 Fe4 O20 79.0(2) . . ?
O1 Fe4 O10 90.7(3) . . ?
O19 Fe4 O10 90.6(3) . . ?
O20 Fe4 O10 92.7(2) . . ?
O1 Fe4 N1 88.8(3) . . ?
O19 Fe4 N1 162.9(3) . . ?
O20 Fe4 N1 87.4(2) . . ?
O10 Fe4 N1 100.5(3) . . ?
O1 Fe4 N8 88.5(3) . . ?
O19 Fe4 N8 81.4(3) . . ?
O20 Fe4 N8 88.6(3) . . ?
O10 Fe4 N8 171.6(3) . . ?
N1 Fe4 N8 87.9(3) . . ?
C7 N1 O3 112.7(7) . . ?
C7 N1 Fe4 128.4(6) . . ?
O3 N1 Fe4 118.7(5) . . ?
C14 N2 O5 111.5(6) . . ?
C14 N2 Fe2 131.1(6) . . ?
O5 N2 Fe2 115.9(5) . . ?
C21 N3 O8 112.7(6) . . ?
C21 N3 Fe1 131.2(6) . . ?
O8 N3 Fe1 115.0(5) . . ?
C28 N4 O20 111.3(7) . . ?
C28 N4 Fe3 130.9(6) . . ?
O20 N4 Fe3 117.1(5) . . ?
C62 N5 C66 117.3(8) . . ?
C62 N5 Fe3 120.8(6) . . ?
C66 N5 Fe3 121.8(6) . . ?
C57 N6 C61 116.4(8) . . ?
C57 N6 Fe1 122.3(6) . . ?
C61 N6 Fe1 121.0(6) . . ?
C67 N7 C71 116.7(11) . . ?
C67 N7 Fe2 123.6(8) . . ?
C71 N7 Fe2 119.5(8) . . ?
C72 N8 C76 114.7(10) . . ?
C72 N8 Fe4 123.3(8) . . ?
C76 N8 Fe4 121.3(8) . . ?
C97 N13 C99 117.1(14) . . ?
C1 O1 Fe4 132.6(6) . . ?
C7 O2 Fe2 114.8(5) . . ?
N1 O3 Fe2 114.0(4) . . ?
N1 O3 Dy1 123.0(4) . . ?
Fe2 O3 Dy1 119.2(2) . . ?
C8 O4 Fe2 130.5(5) . . ?
N2 O5 Fe1 113.9(4) . . ?
N2 O5 Dy1 118.5(4) . . ?
Fe1 O5 Dy1 123.2(3) . . ?
C14 O6 Fe1 112.0(5) . . ?
C15 O7 Fe1 128.7(6) . . ?
N3 O8 Fe3 111.4(4) . . ?
N3 O8 Dy1 118.8(4) . . ?
Fe3 O8 Dy1 117.2(2) . . ?
C21 O9 Fe3 112.1(5) . . ?
C29 O10 Fe4 127.2(6) . . ?
C29 O11 Dy1 138.9(6) . . ?
C36 O12 Fe3 129.9(6) . . ?
C36 O13 Dy1 143.3(6) . . ?
C43 O14 Dy1 133.0(6) . . ?
C43 O15 Fe1 134.0(6) . . ?
C50 O16 Dy1 139.4(6) . . ?
C50 O17 Fe2 130.8(6) . . ?
C22 O18 Fe3 134.3(6) . . ?
C28 O19 Fe4 113.0(5) . . ?
N4 O20 Fe4 113.7(4) . . ?
N4 O20 Dy1 122.5(4) . . ?
Fe4 O20 Dy1 119.6(2) . . ?
O1 C1 C2 119.0(9) . . ?
O1 C1 C6 123.9(8) . . ?
C2 C1 C6 117.1(9) . . ?
C3 C2 C1 122.5(10) . . ?
C4 C3 C2 120.6(10) . . ?
C3 C4 C5 119.0(10) . . ?
C4 C5 C6 121.5(9) . . ?
C5 C6 C1 119.3(8) . . ?
C5 C6 C7 116.6(8) . . ?
C1 C6 C7 124.1(8) . . ?
O2 C7 N1 120.0(8) . . ?
O2 C7 C6 118.9(8) . . ?
N1 C7 C6 121.1(8) . . ?
O4 C8 C13 124.7(7) . . ?
O4 C8 C9 117.3(8) . . ?
C13 C8 C9 117.9(8) . . ?
C10 C9 C8 122.1(10) . . ?
C11 C10 C9 119.4(9) . . ?
C10 C11 C12 120.4(10) . . ?
C11 C12 C13 121.0(9) . . ?
C8 C13 C12 119.2(8) . . ?
C8 C13 C14 123.9(8) . . ?
C12 C13 C14 117.0(8) . . ?
O6 C14 N2 121.6(7) . . ?
O6 C14 C13 119.0(7) . . ?
N2 C14 C13 119.4(8) . . ?
O7 C15 C16 119.4(9) . . ?
O7 C15 C20 122.6(8) . . ?
C16 C15 C20 117.9(9) . . ?
C17 C16 C15 121.2(10) . . ?
C16 C17 C18 122.2(10) . . ?
C19 C18 C17 117.2(10) . . ?
C18 C19 C20 122.7(10) . . ?
C19 C20 C15 118.7(9) . . ?
C19 C20 C21 117.5(8) . . ?
C15 C20 C21 123.6(8) . . ?
O9 C21 N3 120.9(8) . . ?
O9 C21 C20 120.3(8) . . ?
N3 C21 C20 118.8(8) . . ?
O18 C22 C27 122.9(8) . . ?
O18 C22 C23 116.8(9) . . ?
C27 C22 C23 120.3(9) . . ?
C24 C23 C22 120.5(10) . . ?
C23 C24 C25 119.7(11) . . ?
C26 C25 C24 119.5(11) . . ?
C25 C26 C27 121.7(11) . . ?
C22 C27 C26 118.3(9) . . ?
C22 C27 C28 124.8(8) . . ?
C26 C27 C28 116.9(9) . . ?
O19 C28 N4 122.5(8) . . ?
O19 C28 C27 117.8(8) . . ?
N4 C28 C27 119.7(8) . . ?
O11 C29 O10 123.4(9) . . ?
O11 C29 C30 120.2(9) . . ?
O10 C29 C30 116.3(8) . . ?
C31 C30 C35 119.9(10) . . ?
C31 C30 C29 121.9(9) . . ?
C35 C30 C29 118.2(9) . . ?
C30 C31 C32 121.2(11) . . ?
C33 C32 C31 118.7(11) . . ?
C32 C33 C34 120.7(12) . . ?
C33 C34 C35 121.5(12) . . ?
C30 C35 C34 117.8(11) . . ?
O13 C36 O12 121.9(8) . . ?
O13 C36 C37 120.4(8) . . ?
O12 C36 C37 117.5(8) . . ?
C38 C37 C42 120.2(9) . . ?
C38 C37 C36 120.3(9) . . ?
C42 C37 C36 119.6(9) . . ?
C37 C38 C39 120.2(10) . . ?
C40 C39 C38 119.7(11) . . ?
C41 C40 C39 119.5(10) . . ?
C42 C41 C40 120.4(11) . . ?
C41 C42 C37 119.9(10) . . ?
O14 C43 O15 125.4(8) . . ?
O14 C43 C44 118.2(8) . . ?
O15 C43 C44 116.4(8) . . ?
C45 C44 C49 119.0(9) . . ?
C45 C44 C43 120.6(9) . . ?
C49 C44 C43 120.2(9) . . ?
C44 C45 C46 120.2(11) . . ?
C47 C46 C45 119.5(12) . . ?
C48 C47 C46 121.3(12) . . ?
C47 C48 C49 120.3(12) . . ?
C44 C49 C48 119.7(11) . . ?
O17 C50 O16 123.6(8) . . ?
O17 C50 C51 117.1(8) . . ?
O16 C50 C51 119.3(8) . . ?
C52 C51 C56 119.2(9) . . ?
C52 C51 C50 121.8(9) . . ?
C56 C51 C50 119.0(8) . . ?
C51 C52 C53 119.2(10) . . ?
C54 C53 C52 120.5(10) . . ?
C55 C54 C53 119.9(10) . . ?
C54 C55 C56 120.9(10) . . ?
C55 C56 C51 120.3(9) . . ?
N6 C57 C58 123.9(10) . . ?
C57 C58 C59 118.7(11) . . ?
C60 C59 C58 119.3(11) . . ?
C59 C60 C61 118.6(11) . . ?
N6 C61 C60 123.1(10) . . ?
N5 C62 C63 123.6(9) . . ?
C64 C63 C62 118.6(10) . . ?
C63 C64 C65 118.5(10) . . ?
C64 C65 C66 119.3(10) . . ?
N5 C66 C65 122.7(9) . . ?
N7 C67 C68 125.1(12) . . ?
C69 C68 C67 117.6(14) . . ?
C70 C69 C68 119.5(17) . . ?
C69 C70 C71 118.8(17) . . ?
N7 C71 C70 122.0(14) . . ?
N8 C72 C73 126.3(13) . . ?
C74 C73 C72 118.3(15) . . ?
C73 C74 C75 119.8(16) . . ?
C74 C75 C76 117.9(16) . . ?
N8 C76 C75 122.7(14) . . ?
N9 C77 C78 118.2(12) . . ?
C79 C78 C77 119.0(12) . . ?
C80 C79 C78 119.2(12) . . ?
C79 C80 C81 121.5(12) . . ?
N9 C81 C80 118.3(12) . . ?
N11 C82 C83 116.7(14) . . ?
C84 C83 C82 117.8(16) . . ?
C85 C84 C83 122.6(16) . . ?
C84 C85 C86 118.0(15) . . ?
N11 C86 C85 115.0(14) . . ?
C88 C87 N22 124(4) . . ?
C87 C88 C89 119(4) . . ?
C90 C89 C88 113(3) . . ?
C89 C90 C91 134(4) . . ?
C90 C91 N22 103(3) . . ?
C93 C92 N12 119.4(12) . . ?
C94 C93 C92 121.0(13) . . ?
C93 C94 C95 119.8(12) . . ?
C94 C95 C96 119.7(12) . . ?
C95 C96 N12 120.8(12) . . ?
C98 C97 C99 108.7(18) . 3_566 ?
N13 C97 C99 108.7(18) . 3_566 ?
C97 C98 C99 117.1(14) . . ?
C98 C99 C97 132.5(19) . 3_566 ?
N13 C99 C97 132.5(19) . 3_566 ?
 
_refine_diff_density_max    1.265
_refine_diff_density_min   -1.206
_refine_diff_density_rms    0.135

_shelx_res_file
;

    170527g.res created by SHELXL-2014/7

TITL 170527g in P2(1)/n
CELL 0.71073  14.3011  34.2310  19.5141  90.000 106.873  90.000
ZERR    4.00   0.0013   0.0028   0.0017   0.000   0.003   0.000
LATT 1
SYMM 0.5-X, 0.5+Y, 0.5-Z
SFAC C  H  N  O  Fe Dy
UNIT 394 318 50 80 16 4
OMIT  -1.00  50.04
L.S. 10
ACTA
BOND
FMAP 2
PLAN 20
size 0.45 0.34 0.28
dfix 3.15 0.01 n9 n11
dfix 2.34 0.02 n12 c93 c93 c95 c95 n12 c92 c94 c94 c96 c96 c92 c97 c99
dfix 1.39 0.01 n12 c92 c92 c93 c93 c94 c94 c95 c95 c96 c96 n12 c97 c98 c98 c99
flat 0.02 n12 c92 c93 c94 c95 c96
simu 0.02 0.04 3.8
exyz n13 c98
eadp n13 c98
TEMP 25
WGHT    0.061200   56.191399
FVAR       0.16210
MOLE 1
N9    3    0.921945    0.742806    0.629547    11.00000    0.06522    0.06194 =
         0.06270    0.01572    0.01307   -0.01502
N11   3    0.066795    0.773890    0.569841    11.00000    0.06376    0.06678 =
         0.06406    0.00754    0.00826   -0.00987
AFIX  43
H22   2    0.028707    0.763487    0.591667    11.00000   -1.20000
AFIX   0
N12   3    0.887420    0.476330    0.640831    11.00000    0.32219    0.23660 =
         0.30283   -0.00835   -0.04931   -0.00598
N22   3    0.561237    0.371729    0.754337    11.00000    0.17966    0.16009 =
         0.19855   -0.02238    0.01113   -0.01707
DY1   6    0.469358    0.666076    0.751980    11.00000    0.02569    0.03501 =
         0.03507    0.00266    0.01130    0.00119
FE1   5    0.432298    0.587637    0.882549    11.00000    0.02619    0.03828 =
         0.03147    0.00679    0.00965    0.00098
FE2   5    0.687215    0.598391    0.775163    11.00000    0.02553    0.03418 =
         0.03609    0.00602    0.01103    0.00406
FE3   5    0.199286    0.639470    0.674217    11.00000    0.02247    0.03815 =
         0.03144    0.00287    0.00688   -0.00127
FE4   5    0.452910    0.643687    0.557047    11.00000    0.03101    0.03947 =
         0.03079    0.00379    0.01288    0.00175
N1    3    0.573972    0.624694    0.635661    11.00000    0.03109    0.03783 =
         0.03866    0.00543    0.01755    0.00050
N2    3    0.612159    0.599148    0.850066    11.00000    0.02389    0.03964 =
         0.03697    0.00760    0.01276    0.00463
N3    3    0.324023    0.595313    0.787157    11.00000    0.03145    0.03325 =
         0.03467    0.00087    0.01179    0.00122
N4    3    0.280336    0.647923    0.603987    11.00000    0.02446    0.04285 =
         0.03524    0.00418    0.00916   -0.00149
N5    3    0.102690    0.630932    0.742977    11.00000    0.02666    0.04265 =
         0.04178    0.00427    0.01658   -0.00289
N6    3    0.363151    0.565442    0.960206    11.00000    0.03961    0.04997 =
         0.04647    0.01133    0.01958    0.00487
N7    3    0.622742    0.539316    0.741808    11.00000    0.04245    0.04872 =
         0.06318    0.00067    0.01540    0.00473
N8    3    0.407132    0.579662    0.536626    11.00000    0.05259    0.05109 =
         0.05657   -0.00356    0.02302   -0.00688
PART 1
N13   3    0.041464    0.536205    0.536859    10.50000    0.12858    0.13954 =
         0.13792    0.00357   -0.00010    0.00051
PART 0
O1    4    0.524678    0.638485    0.489713    11.00000    0.04648    0.05537 =
         0.04402    0.00966    0.02454    0.00874
O2    4    0.724176    0.597675    0.684291    11.00000    0.03833    0.04792 =
         0.04435    0.00530    0.02040    0.00866
O3    4    0.569845    0.623238    0.706521    11.00000    0.02932    0.04323 =
         0.03066    0.00318    0.02013    0.00433
O4    4    0.791484    0.572224    0.843701    11.00000    0.03066    0.05326 =
         0.04410    0.01627    0.01481    0.01181
O5    4    0.513354    0.609274    0.824769    11.00000    0.02560    0.04417 =
         0.03646    0.00979    0.01143    0.00624
O6    4    0.568795    0.581369    0.947962    11.00000    0.03377    0.04510 =
         0.03302    0.00938    0.01160   -0.00139
O7    4    0.427808    0.533020    0.854579    11.00000    0.03949    0.03769 =
         0.04871    0.00624    0.01038    0.00069
O8    4    0.317659    0.633364    0.758320    11.00000    0.02769    0.03566 =
         0.03516    0.00711    0.01220    0.00230
O9    4    0.212998    0.581085    0.680938    11.00000    0.03769    0.03992 =
         0.03885   -0.00070    0.00897   -0.00710
O10   4    0.476694    0.702282    0.562334    11.00000    0.05275    0.04860 =
         0.04272    0.00729    0.01795    0.00790
O11   4    0.524592    0.710727    0.680003    11.00000    0.04507    0.04885 =
         0.04197    0.00792    0.01931   -0.00574
O12   4    0.191943    0.696219    0.699710    11.00000    0.03408    0.03986 =
         0.04566    0.00862    0.00830    0.00534
O13   4    0.346493    0.714644    0.719134    11.00000    0.03109    0.03391 =
         0.05479    0.00341    0.01513    0.00284
O14   4    0.447002    0.687377    0.862214    11.00000    0.03813    0.04132 =
         0.03974   -0.00525    0.02021   -0.00447
O15   4    0.392709    0.639345    0.918162    11.00000    0.03865    0.03892 =
         0.04253   -0.00142    0.01693   -0.00097
O16   4    0.629515    0.687064    0.818812    11.00000    0.02697    0.04226 =
         0.04020    0.00230    0.01111   -0.00552
O17   4    0.751990    0.650626    0.804108    11.00000    0.03106    0.04442 =
         0.04985   -0.00665    0.01383    0.00186
O18   4    0.086993    0.640126    0.593013    11.00000    0.03036    0.06542 =
         0.04135    0.00578    0.00907   -0.00419
O19   4    0.315894    0.651975    0.497164    11.00000    0.03512    0.05295 =
         0.03581    0.00819    0.01280   -0.00103
O20   4    0.383015    0.645276    0.632044    11.00000    0.02433    0.04439 =
         0.03107    0.00128    0.00795    0.00125
C1    1    0.609266    0.622306    0.493361    11.00000    0.04230    0.04431 =
         0.04441   -0.00002    0.02751   -0.00484
C2    1    0.635909    0.617549    0.430647    11.00000    0.05315    0.06045 =
         0.04904    0.00350    0.02681    0.00230
AFIX  43
H2    2    0.593816    0.626540    0.387766    11.00000   -1.20000
AFIX   0
C3    1    0.721899    0.600101    0.429752    11.00000    0.06109    0.06747 =
         0.05883   -0.00449    0.03441    0.00062
AFIX  43
H3    2    0.737248    0.597804    0.386766    11.00000   -1.20000
AFIX   0
C4    1    0.784564    0.586209    0.490820    11.00000    0.04902    0.05811 =
         0.06444   -0.00891    0.03995    0.00391
AFIX  43
H4    2    0.842716    0.574297    0.490099    11.00000   -1.20000
AFIX   0
C5    1    0.760751    0.590003    0.554632    11.00000    0.04117    0.04692 =
         0.04718   -0.00324    0.02308   -0.00297
AFIX  43
H5    2    0.803675    0.580493    0.596729    11.00000   -1.20000
AFIX   0
C6    1    0.674116    0.607712    0.557031    11.00000    0.03702    0.03698 =
         0.04572    0.00311    0.02207   -0.00645
C7    1    0.657044    0.610386    0.628443    11.00000    0.02995    0.03313 =
         0.04192   -0.00112    0.01769   -0.00632
C8    1    0.805720    0.565560    0.913598    11.00000    0.02782    0.03615 =
         0.04485    0.01196    0.00697    0.00124
C9    1    0.897502    0.550392    0.952966    11.00000    0.03552    0.05078 =
         0.04817    0.00611    0.00868    0.00949
AFIX  43
H9    2    0.944451    0.545757    0.929471    11.00000   -1.20000
AFIX   0
C10   1    0.919622    0.542254    1.025054    11.00000    0.03521    0.06638 =
         0.06017    0.01372    0.00211    0.01236
AFIX  43
H10   2    0.981133    0.532847    1.049889    11.00000   -1.20000
AFIX   0
C11   1    0.850789    0.548090    1.059568    11.00000    0.04525    0.06360 =
         0.05450    0.00858    0.00427    0.00463
AFIX  43
H11   2    0.864965    0.542223    1.108042    11.00000   -1.20000
AFIX   0
C12   1    0.759235    0.562788    1.022825    11.00000    0.03594    0.05415 =
         0.04559    0.00791    0.01193    0.00806
AFIX  43
H12   2    0.713334    0.567193    1.047344    11.00000   -1.20000
AFIX   0
C13   1    0.735223    0.571034    0.949564    11.00000    0.02867    0.04106 =
         0.03696    0.00767    0.00641    0.00465
C14   1    0.633451    0.584521    0.914115    11.00000    0.02882    0.03411 =
         0.03618   -0.00021    0.01210    0.00360
C15   1    0.352249    0.512351    0.817659    11.00000    0.04831    0.03274 =
         0.04715    0.00552    0.01894    0.00226
C16   1    0.350886    0.471754    0.828845    11.00000    0.06048    0.03411 =
         0.05857    0.01195    0.01582    0.00062
AFIX  43
H16   2    0.401771    0.460204    0.863902    11.00000   -1.20000
AFIX   0
C17   1    0.276713    0.449160    0.789434    11.00000    0.07446    0.03817 =
         0.07683    0.00204    0.02175   -0.00568
AFIX  43
H17   2    0.277396    0.422541    0.799098    11.00000   -1.20000
AFIX   0
C18   1    0.199956    0.464411    0.735254    11.00000    0.06703    0.04584 =
         0.07556   -0.00647    0.00859   -0.00608
AFIX  43
H18   2    0.149859    0.448565    0.708341    11.00000   -1.20000
AFIX   0
C19   1    0.200968    0.504080    0.722913    11.00000    0.05292    0.04414 =
         0.06239   -0.00292    0.00772   -0.00699
AFIX  43
H19   2    0.150600    0.514864    0.686399    11.00000   -1.20000
AFIX   0
C20   1    0.274753    0.528788    0.763126    11.00000    0.04359    0.03595 =
         0.04195   -0.00073    0.01744   -0.00393
C21   1    0.270699    0.569948    0.742126    11.00000    0.03192    0.03117 =
         0.03818    0.00150    0.01149   -0.00238
C22   1    0.072207    0.646510    0.523469    11.00000    0.03489    0.05639 =
         0.03875    0.00507    0.00653   -0.00385
C23   1   -0.025027    0.648138    0.480723    11.00000    0.03732    0.09418 =
         0.04563    0.00544    0.00333   -0.00956
AFIX  43
H23   2   -0.075321    0.643598    0.501069    11.00000   -1.20000
AFIX   0
C24   1   -0.046726    0.656415    0.408746    11.00000    0.04372    0.12049 =
         0.05575    0.01414    0.00265   -0.00698
AFIX  43
H24   2   -0.111437    0.657395    0.380534    11.00000   -1.20000
AFIX   0
C25   1    0.028755    0.663322    0.378337    11.00000    0.05438    0.12759 =
         0.05339    0.01680    0.00051   -0.00466
AFIX  43
H25   2    0.014686    0.669767    0.330111    11.00000   -1.20000
AFIX   0
C26   1    0.124137    0.660527    0.420221    11.00000    0.04307    0.10746 =
         0.04488    0.01326    0.00736   -0.01094
AFIX  43
H26   2    0.174214    0.664391    0.399377    11.00000   -1.20000
AFIX   0
C27   1    0.147787    0.652022    0.493376    11.00000    0.03642    0.06642 =
         0.03108    0.00650    0.00323   -0.00020
C28   1    0.253516    0.650561    0.533550    11.00000    0.03137    0.04913 =
         0.03526    0.00568    0.00544   -0.00674
C29   1    0.498202    0.723891    0.618790    11.00000    0.03572    0.05054 =
         0.04515    0.00918    0.02250    0.00039
C30   1    0.494381    0.767321    0.606541    11.00000    0.05676    0.04257 =
         0.05246    0.00368    0.02420   -0.00396
C31   1    0.462481    0.783055    0.539245    11.00000    0.07565    0.04718 =
         0.05889    0.00855    0.01972   -0.00210
AFIX  43
H31   2    0.446439    0.766556    0.499679    11.00000   -1.20000
AFIX   0
C32   1    0.453656    0.823075    0.528990    11.00000    0.09477    0.04631 =
         0.07055    0.01812    0.01101    0.00290
AFIX  43
H32   2    0.431014    0.833477    0.483110    11.00000   -1.20000
AFIX   0
C33   1    0.478507    0.846664    0.586769    11.00000    0.10168    0.04492 =
         0.09233    0.00910    0.01997    0.00365
AFIX  43
H33   2    0.473712    0.873606    0.580615    11.00000   -1.20000
AFIX   0
C34   1    0.510582    0.831475    0.654108    11.00000    0.10619    0.06215 =
         0.07879   -0.01259    0.03003   -0.00399
AFIX  43
H34   2    0.525756    0.848285    0.693231    11.00000   -1.20000
AFIX   0
C35   1    0.521100    0.791584    0.665619    11.00000    0.07578    0.05634 =
         0.06103   -0.00525    0.02114   -0.00246
AFIX  43
H35   2    0.545350    0.781461    0.711603    11.00000   -1.20000
AFIX   0
C36   1    0.259952    0.722197    0.717133    11.00000    0.02855    0.04167 =
         0.03698    0.01190    0.00316    0.00090
C37   1    0.231257    0.762568    0.730496    11.00000    0.04137    0.03504 =
         0.04016    0.00048    0.01065    0.00880
C38   1    0.287225    0.793399    0.723273    11.00000    0.03861    0.04529 =
         0.05538   -0.00390    0.01126    0.00334
AFIX  43
H38   2    0.343886    0.789257    0.710039    11.00000   -1.20000
AFIX   0
C39   1    0.260456    0.830797    0.735461    11.00000    0.05778    0.04663 =
         0.06396   -0.00681    0.00242   -0.00150
AFIX  43
H39   2    0.299197    0.851886    0.730875    11.00000   -1.20000
AFIX   0
C40   1    0.176134    0.836857    0.754459    11.00000    0.07288    0.05341 =
         0.05997   -0.01050    0.01071    0.01731
AFIX  43
H40   2    0.156295    0.862094    0.761096    11.00000   -1.20000
AFIX   0
C41   1    0.121671    0.805413    0.763514    11.00000    0.05707    0.05719 =
         0.06566   -0.00398    0.02001    0.01247
AFIX  43
H41   2    0.066457    0.809276    0.778713    11.00000   -1.20000
AFIX   0
C42   1    0.147873    0.768466    0.750388    11.00000    0.04708    0.04915 =
         0.05506   -0.00093    0.01774    0.01007
AFIX  43
H42   2    0.109279    0.747317    0.754918    11.00000   -1.20000
AFIX   0
C43   1    0.397155    0.674639    0.900440    11.00000    0.03237    0.04491 =
         0.03449   -0.00197    0.00955   -0.00071
C44   1    0.337603    0.703365    0.928819    11.00000    0.03430    0.04697 =
         0.03135   -0.00888    0.00627    0.00222
C45   1    0.340657    0.742459    0.914688    11.00000    0.05321    0.05196 =
         0.04884   -0.00921    0.01187    0.00637
AFIX  43
H45   2    0.383426    0.751701    0.890487    11.00000   -1.20000
AFIX   0
C46   1    0.279068    0.768754    0.936757    11.00000    0.06597    0.06370 =
         0.05449   -0.01007    0.00814    0.01353
AFIX  43
H46   2    0.281955    0.795369    0.928011    11.00000   -1.20000
AFIX   0
C47   1    0.216198    0.755032    0.970520    11.00000    0.05446    0.08198 =
         0.06145   -0.02015    0.00701    0.01479
AFIX  43
H47   2    0.174293    0.772302    0.983737    11.00000   -1.20000
AFIX   0
C48   1    0.212726    0.716863    0.985535    11.00000    0.05121    0.08444 =
         0.06374   -0.01843    0.02193   -0.00159
AFIX  43
H48   2    0.169570    0.708073    1.009785    11.00000   -1.20000
AFIX   0
C49   1    0.273792    0.690244    0.964840    11.00000    0.04142    0.06071 =
         0.04951   -0.01752    0.01546   -0.00137
AFIX  43
H49   2    0.271319    0.663832    0.975347    11.00000   -1.20000
AFIX   0
C50   1    0.717939    0.682527    0.819262    11.00000    0.03458    0.04946 =
         0.02677    0.00352    0.01548   -0.00121
C51   1    0.785633    0.716050    0.837024    11.00000    0.04077    0.04211 =
         0.04176   -0.00222    0.01801   -0.00788
C52   1    0.757027    0.751439    0.855857    11.00000    0.04488    0.05331 =
         0.06558   -0.01165    0.02473   -0.00428
AFIX  43
H52   2    0.693089    0.755304    0.856906    11.00000   -1.20000
AFIX   0
C53   1    0.825272    0.781969    0.873643    11.00000    0.05889    0.04832 =
         0.07292   -0.01646    0.02204   -0.00831
AFIX  43
H53   2    0.806495    0.806188    0.886766    11.00000   -1.20000
AFIX   0
C54   1    0.918657    0.776402    0.871830    11.00000    0.05065    0.06122 =
         0.07579   -0.01181    0.02015   -0.01762
AFIX  43
H54   2    0.963681    0.796696    0.884044    11.00000   -1.20000
AFIX   0
C55   1    0.945907    0.741363    0.852268    11.00000    0.04204    0.05845 =
         0.06354   -0.00909    0.02479   -0.01145
AFIX  43
H55   2    1.009272    0.737955    0.849600    11.00000   -1.20000
AFIX   0
C56   1    0.881944    0.710980    0.836411    11.00000    0.04183    0.04416 =
         0.05338   -0.01109    0.01262   -0.00900
AFIX  43
H56   2    0.902662    0.686705    0.825106    11.00000   -1.20000
AFIX   0
C57   1    0.269351    0.571996    0.954522    11.00000    0.04806    0.05662 =
         0.05789    0.01556    0.02313    0.00204
AFIX  43
H57   2    0.234795    0.588923    0.918847    11.00000   -1.20000
AFIX   0
C58   1    0.221031    0.555336    0.997954    11.00000    0.05580    0.06996 =
         0.08538    0.00995    0.03152   -0.00515
AFIX  43
H58   2    0.154982    0.560282    0.990999    11.00000   -1.20000
AFIX   0
C59   1    0.271639    0.531181    1.052010    11.00000    0.06999    0.06530 =
         0.07590    0.01780    0.04152   -0.00836
AFIX  43
H59   2    0.240617    0.519843    1.082860    11.00000   -1.20000
AFIX   0
C60   1    0.367885    0.523958    1.060060    11.00000    0.07638    0.06056 =
         0.06760    0.01787    0.02375   -0.00060
AFIX  43
H60   2    0.403872    0.507932    1.096767    11.00000   -1.20000
AFIX   0
C61   1    0.410892    0.540945    1.012542    11.00000    0.04913    0.04749 =
         0.05300    0.01528    0.02031    0.00816
AFIX  43
H61   2    0.475920    0.535167    1.016952    11.00000   -1.20000
AFIX   0
C62   1    0.025775    0.607568    0.722846    11.00000    0.03714    0.06600 =
         0.04832   -0.00924    0.01821   -0.01466
AFIX  43
H62   2    0.011092    0.596257    0.677633    11.00000   -1.20000
AFIX   0
C63   1   -0.033769    0.599078    0.765213    11.00000    0.04388    0.06985 =
         0.06368   -0.00114    0.02263   -0.01934
AFIX  43
H63   2   -0.087817    0.582880    0.748507    11.00000   -1.20000
AFIX   0
C64   1   -0.011768    0.614906    0.832003    11.00000    0.03951    0.06269 =
         0.06487    0.01481    0.02346   -0.00113
AFIX  43
H64   2   -0.049710    0.609373    0.862260    11.00000   -1.20000
AFIX   0
C65   1    0.067795    0.639248    0.853688    11.00000    0.03820    0.07061 =
         0.05041    0.00322    0.02200    0.00358
AFIX  43
H65   2    0.084603    0.650446    0.899054    11.00000   -1.20000
AFIX   0
C66   1    0.122277    0.646871    0.807630    11.00000    0.03119    0.05185 =
         0.04385    0.00012    0.01105   -0.00390
AFIX  43
H66   2    0.175012    0.663889    0.822358    11.00000   -1.20000
AFIX   0
C67   1    0.531203    0.531877    0.726649    11.00000    0.06378    0.06584 =
         0.08237   -0.01791    0.02590   -0.00792
AFIX  43
H67   2    0.489754    0.552468    0.728862    11.00000   -1.20000
AFIX   0
C68   1    0.489011    0.495437    0.707157    11.00000    0.07933    0.07143 =
         0.09042   -0.01137    0.02925   -0.01396
AFIX  43
H68   2    0.421535    0.492220    0.693165    11.00000   -1.20000
AFIX   0
C69   1    0.548462    0.465371    0.709220    11.00000    0.11459    0.09177 =
         0.13399   -0.00922    0.01789   -0.00841
AFIX  43
H69   2    0.523301    0.440256    0.699506    11.00000   -1.20000
AFIX   0
C70   1    0.643108    0.471377    0.725090    11.00000    0.11826    0.08212 =
         0.14768   -0.01238    0.00181    0.01099
AFIX  43
H70   2    0.685464    0.450856    0.724455    11.00000   -1.20000
AFIX   0
C71   1    0.679794    0.510028    0.743350    11.00000    0.08298    0.07497 =
         0.11100   -0.00979    0.00251    0.00103
AFIX  43
H71   2    0.746955    0.514140    0.756758    11.00000   -1.20000
AFIX   0
C72   1    0.355637    0.561605    0.570590    11.00000    0.07499    0.05920 =
         0.08099   -0.00626    0.02959   -0.00682
AFIX  43
H72   2    0.342244    0.574931    0.608197    11.00000   -1.20000
AFIX   0
C73   1    0.318234    0.524336    0.556699    11.00000    0.10488    0.08057 =
         0.11223   -0.00661    0.04226   -0.03140
AFIX  43
H73   2    0.281235    0.513386    0.583886    11.00000   -1.20000
AFIX   0
C74   1    0.335699    0.505302    0.505641    11.00000    0.12212    0.09172 =
         0.11471   -0.01781    0.03741   -0.04034
AFIX  43
H74   2    0.311620    0.480075    0.495242    11.00000   -1.20000
AFIX   0
C75   1    0.389592    0.521952    0.466423    11.00000    0.13857    0.09249 =
         0.11797   -0.02949    0.04525   -0.03369
AFIX  43
H75   2    0.405360    0.508128    0.430269    11.00000   -1.20000
AFIX   0
C76   1    0.420536    0.560468    0.482129    11.00000    0.09586    0.07149 =
         0.09002   -0.01533    0.03480   -0.02728
AFIX  43
H76   2    0.451936    0.573014    0.452724    11.00000   -1.20000
AFIX   0
C77   1    0.918341    0.703476    0.629552    11.00000    0.06715    0.06050 =
         0.07231   -0.00295    0.02040   -0.00213
AFIX  43
H77   2    0.967341    0.688667    0.619591    11.00000   -1.20000
AFIX   0
C78   1    0.840106    0.685792    0.644711    11.00000    0.06268    0.05991 =
         0.06743    0.00245    0.01540   -0.01173
AFIX  43
H78   2    0.834729    0.658713    0.644400    11.00000   -1.20000
AFIX   0
C79   1    0.771086    0.708437    0.660083    11.00000    0.05322    0.06675 =
         0.06137    0.00800    0.01195   -0.01031
AFIX  43
H79   2    0.716848    0.697104    0.669262    11.00000   -1.20000
AFIX   0
C80   1    0.781945    0.747507    0.661911    11.00000    0.06081    0.07603 =
         0.06770    0.00336    0.01948    0.00963
AFIX  43
H80   2    0.734863    0.763038    0.672844    11.00000   -1.20000
AFIX   0
C81   1    0.859913    0.764740    0.648186    11.00000    0.06864    0.05669 =
         0.07859    0.00108    0.01187    0.00937
AFIX  43
H81   2    0.868563    0.791661    0.652080    11.00000   -1.20000
AFIX   0
C82   1    0.120593    0.750075    0.548975    11.00000    0.07751    0.07599 =
         0.06972   -0.00413    0.02149   -0.00134
AFIX  43
H82   2    0.117353    0.723308    0.556123    11.00000   -1.20000
AFIX   0
C83   1    0.183795    0.765685    0.515358    11.00000    0.10544    0.11621 =
         0.09222   -0.00989    0.04181   -0.00883
AFIX  43
H83   2    0.225886    0.749853    0.499238    11.00000   -1.20000
AFIX   0
C84   1    0.182958    0.805032    0.506348    11.00000    0.10242    0.11194 =
         0.08349    0.01879    0.03288   -0.01189
AFIX  43
H84   2    0.225741    0.816030    0.483844    11.00000   -1.20000
AFIX   0
C85   1    0.123140    0.828545    0.528524    11.00000    0.08628    0.09332 =
         0.08433    0.02706    0.00922   -0.00511
AFIX  43
H85   2    0.123217    0.855377    0.521058    11.00000   -1.20000
AFIX   0
C86   1    0.060384    0.811654    0.563293    11.00000    0.06657    0.07897 =
         0.07252    0.00694    0.00634    0.00320
AFIX  43
H86   2    0.017270    0.826339    0.580455    11.00000   -1.20000
AFIX   0
C87   1    0.572353    0.378148    0.825572    11.00000    0.18294    0.16548 =
         0.19401   -0.01652    0.00163   -0.01347
AFIX  43
H87   2    0.517663    0.385838    0.838803    11.00000   -1.20000
AFIX   0
C88   1    0.645858    0.374595    0.870609    11.00000    0.19236    0.17707 =
         0.21680   -0.02528   -0.00224   -0.00196
AFIX  43
H88   2    0.648114    0.377596    0.918428    11.00000   -1.20000
AFIX   0
C89   1    0.736053    0.365198    0.850662    11.00000    0.18998    0.18158 =
         0.21702   -0.02614    0.00099   -0.00232
AFIX  43
H89   2    0.797387    0.362561    0.883699    11.00000   -1.20000
AFIX   0
C90   1    0.719066    0.360896    0.779002    11.00000    0.21314    0.18517 =
         0.22085   -0.02404   -0.00690    0.00633
AFIX  43
H90   2    0.774458    0.353429    0.766482    11.00000   -1.20000
AFIX   0
C91   1    0.638837    0.365090    0.721321    11.00000    0.17842    0.15743 =
         0.20900   -0.03262    0.00727    0.00321
AFIX  43
H91   2    0.634717    0.363984    0.672915    11.00000   -1.20000
AFIX   0
C92   1    0.867070    0.437397    0.648808    11.00000    0.31929    0.22667 =
         0.29688   -0.00620   -0.04421    0.00045
AFIX  43
H92   2    0.842535    0.421646    0.608777    11.00000   -1.20000
AFIX   0
C93   1    0.883483    0.422148    0.716636    11.00000    0.29911    0.22119 =
         0.27593   -0.00627   -0.04127    0.00609
AFIX  43
H93   2    0.869700    0.395980    0.722123    11.00000   -1.20000
AFIX   0
C94   1    0.919700    0.444903    0.775928    11.00000    0.30849    0.22192 =
         0.28429   -0.00849   -0.04725   -0.00141
AFIX  43
H94   2    0.930461    0.434235    0.821392    11.00000   -1.20000
AFIX   0
C95   1    0.940133    0.483479    0.768259    11.00000    0.27456    0.20430 =
         0.26063   -0.00571   -0.03990   -0.00036
AFIX  43
H95   2    0.965548    0.498999    0.808484    11.00000   -1.20000
AFIX   0
C96   1    0.922924    0.499161    0.700870    11.00000    0.30884    0.22703 =
         0.28759   -0.01916   -0.04522   -0.00976
AFIX  43
H96   2    0.935411    0.525499    0.695776    11.00000   -1.20000
AFIX   0
C97   1    0.048578    0.532416    0.467995    11.00000    0.16319    0.16503 =
         0.16762   -0.00841   -0.00354    0.00072
AFIX  43
H97   2    0.071444    0.551445    0.442860    11.00000   -1.20000
PART 2
AFIX   0
C98   1    0.041464    0.536205    0.536859    10.50000    0.12858    0.13954 =
         0.13792    0.00357   -0.00010    0.00051
AFIX  43
H98   2    0.071673    0.556653    0.566432    10.50000   -1.20000
PART 0
AFIX   0
C99   1   -0.012657    0.508198    0.559905    11.00000    0.14023    0.14281 =
         0.17867   -0.00301   -0.01513   -0.02115
AFIX  43
H99   2   -0.030563    0.515593    0.600202    11.00000   -1.20000
AFIX   0
hklf 4

REM  170527g in P2(1)/n
REM R1 =  0.0706 for   10256 Fo > 4sig(Fo)  and  0.1238 for all   16090 data
REM   1225 parameters refined using   4033 restraints

END

WGHT      0.0612     56.2004

REM Highest difference peak  1.265,  deepest hole -1.206,  1-sigma level  0.135
Q1    1   0.5100  0.6683  0.7286  11.00000  0.05    1.26
Q2    1   0.9552  0.7414  0.6364  11.00000  0.05    0.96
Q3    1   0.0393  0.7751  0.5756  11.00000  0.05    0.93
Q4    1   0.4824  0.6466  0.7830  11.00000  0.05    0.92
Q5    1   0.2146  0.6581  0.8634  11.00000  0.05    0.89
Q6    1   0.2394  0.7152  0.5405  11.00000  0.05    0.88
Q7    1   0.4336  0.7450  0.8831  11.00000  0.05    0.79
Q8    1   0.4244  0.5698  0.6937  11.00000  0.05    0.78
Q9    1   0.5012  0.7447  0.6179  11.00000  0.05    0.75
Q10   1   0.6831  0.3830  0.6407  11.00000  0.05    0.74
Q11   1   0.4173  0.6466  0.7104  11.00000  0.05    0.71
Q12   1   0.7464  0.6382  0.8344  11.00000  0.05    0.69
Q13   1   0.2360  0.6379  0.6461  11.00000  0.05    0.68
Q14   1   0.7221  0.6731  0.6411  11.00000  0.05    0.68
Q15   1   0.4818  0.6892  0.9456  11.00000  0.05    0.68
Q16   1   0.6985  0.6161  0.9648  11.00000  0.05    0.67
Q17   1   0.5111  0.6438  0.5397  11.00000  0.05    0.67
Q18   1  -0.0027  0.5110  0.4994  11.00000  0.05    0.65
Q19   1   0.4714  0.6863  0.7856  11.00000  0.05    0.65
Q20   1   0.5698  0.5197  0.7595  11.00000  0.05    0.64
;
_shelx_res_checksum   34379

_shelx_hkl_file
;
   2   0   0   89.72    7.07
   3   0   0    3.93    3.62
   4   0   0 2016.28  109.94
   5   0   0   -0.34    4.37
   6   0   0   36.89    8.62
   7   0   0   -6.96    5.95
   8   0   0  538.03   37.34
   9   0   0   -5.42    7.64
  10   0   0   21.05   10.60
  11   0   0    4.83   10.51
  12   0   0  405.72   35.88
 -12   0   0  436.57   36.80
 -13   0   0    2.78   13.43
  13   0   0   -4.21   13.06
 -14   0   0   62.30   21.46
 -15   0   0  -16.93   14.16
 -16   0   0   31.83   18.74
 -15   1   0   29.16   18.78
  14  -1   0  112.33   25.22
 -14   1   0  163.14   27.19
 -13   1   0   -7.12   11.73
  13  -1   0  -12.71   11.94
 -12   1   0   14.08   13.32
  12  -1   0    8.07   13.99
 -11   1   0   78.82   17.78
  11  -1   0   76.54   17.78
  10  -1   0  254.69   24.18
   9  -1   0  264.47   23.54
   8  -1   0  814.12   52.31
   7  -1   0    2.87    6.86
   6  -1   0 1301.29   75.17
   5  -1   0   38.39    7.91
   4  -1   0 2442.20  132.47
   3  -1   0  615.73   36.02
   2  -1   0  458.88   26.66
   3   1   0  598.78   34.45
   4   1   0 2396.77  129.40
   5   1   0   23.27    6.32
   6   1   0 1329.97   76.00
   7   1   0   -2.14    7.08
   8   1   0  822.30   51.82
   9   1   0  251.18   22.72
  10   1   0  299.05   26.57
  11   1   0   73.07   16.76
 -11  -1   0  102.08   16.34
  12   1   0   28.47   15.24
 -12  -1   0    5.28   13.12
 -13  -1   0  -10.34   10.04
  13   1   0   -9.49   11.81
 -14  -1   0  148.99   28.46
 -15  -1   0   35.43   20.55
 -16  -1   0   36.19   20.25
 -15   2   0   -6.73   14.14
  14  -2   0   53.43   21.83
 -14   2   0   55.14   19.53
 -13   2   0   10.38   13.48
  13  -2   0   13.72   14.49
  12  -2   0   96.84   20.37
 -12   2   0   70.68   18.66
 -11   2   0  168.00   23.42
  11  -2   0  156.68   24.67
 -10   2   0   48.74   14.29
  10  -2   0   32.95   12.81
   9  -2   0   60.44   13.96
   8  -2   0   56.95   13.24
   7  -2   0  747.51   47.90
   6  -2   0  199.63   17.70
   5  -2   0 1118.15   64.78
   4  -2   0 1108.13   63.14
   3  -2   0 3169.17  169.61
   2  -2   0  488.19   28.46
  -2  -2   0  467.32   24.88
   3   2   0 3248.62  172.54
   4   2   0 1043.05   58.41
   5   2   0 1152.48   65.21
   6   2   0  212.42   17.28
   7   2   0  740.86   46.23
   8   2   0   51.82   11.86
  -9  -2   0   80.24   12.85
   9   2   0   63.85   13.49
 -10  -2   0   62.77   12.71
  10   2   0   56.94   13.73
 -11  -2   0  155.79   19.97
  11   2   0  138.54   22.15
  12   2   0  108.93   21.79
 -13  -2   0    0.08   12.68
 -14  -2   0   60.27   21.93
 -15  -2   0    1.29   17.61
 -16  -2   0   60.68   23.22
 -17  -2   0   15.78   18.01
  15  -3   0  183.89   32.22
  14  -3   0    5.99   15.23
 -14   3   0    6.52   14.50
  13  -3   0  249.63   28.32
 -13   3   0  212.95   25.58
 -12   3   0   84.79   19.82
  12  -3   0   93.13   20.57
  11  -3   0  196.67   22.35
 -11   3   0  168.87   20.37
  10  -3   0   -6.33    9.58
 -10   3   0   -1.83    8.46
   9  -3   0  168.25   19.20
  -9   3   0  170.31   21.44
   8  -3   0    6.90    9.29
   7  -3   0   33.85   10.38
   6  -3   0    1.02    5.95
   5  -3   0  157.33   14.35
   4  -3   0  466.79   29.82
   3  -3   0  724.72   42.36
   2  -3   0  122.57    9.01
   2  -3   0   90.77    7.20
   1  -3   0 3471.93  184.25
  -2  -3   0  105.80    7.55
  -3  -3   0  686.10   37.31
   3   3   0  715.75   39.19
  -4  -3   0  422.47   25.11
   4   3   0  447.24   26.35
  -5  -3   0  157.41   11.94
   5   3   0  141.79   12.23
   6   3   0    4.79    5.33
  -6  -3   0   -1.16    4.57
   7   3   0   26.79    8.50
  -7  -3   0   33.72    9.28
  -8  -3   0   -0.16    7.06
   8   3   0   -5.39    6.81
   9   3   0  171.35   17.62
  -9  -3   0  153.41   15.65
  10   3   0   -3.77    8.79
 -10  -3   0    2.94    7.78
 -11  -3   0  229.69   21.03
  11   3   0  211.06   22.77
 -12  -3   0  111.28   18.96
  12   3   0   73.33   18.34
 -13  -3   0  233.86   31.92
 -14  -3   0    2.14   15.83
 -15  -3   0  296.21   39.40
 -16  -3   0   22.50   18.62
 -17  -3   0   37.77   20.74
  15  -4   0   21.23   21.05
 -14   4   0  150.60   25.36
  14  -4   0  130.92   27.06
 -13   4   0  193.17   22.84
  13  -4   0  193.25   29.71
  12  -4   0  225.40   30.50
 -12   4   0  158.29   24.27
 -11   4   0  622.87   42.59
  11  -4   0  532.81   43.20
 -10   4   0   58.28   13.40
  10  -4   0   24.28   12.82
  -9   4   0  218.34   20.29
   9  -4   0  185.07   20.48
  -8   4   0  371.06   30.31
   8  -4   0  496.70   34.07
   7  -4   0 1304.44   75.48
  -7   4   0 1210.16   71.44
   6  -4   0    8.24    6.65
  -5   4   0   62.38    7.80
   5  -4   0   80.00    9.98
  -4   4   0  240.12   15.37
   4  -4   0  200.02   16.66
  -3   4   0  104.07    8.24
   3  -4   0  112.41   10.35
   3  -4   0  107.03    8.78
   2  -4   0  810.27   44.88
   2  -4   0  763.75   40.75
   1  -4   0  372.98   21.82
   1  -4   0  447.11   24.15
   0  -4   0 6148.70  300.56
  -1  -4   0  378.31   20.54
  -2  -4   0  751.56   39.36
  -3  -4   0   96.29    8.26
  -4  -4   0  199.79   13.68
   4   4   0  181.94   13.08
   5   4   0   73.21    7.85
  -5  -4   0   72.81    7.98
   6   4   0    9.84    5.59
  -6  -4   0    4.63    5.37
  -7  -4   0 1295.56   70.19
   7   4   0 1308.08   74.76
  -8  -4   0  463.95   30.52
   8   4   0  478.50   32.76
  -9  -4   0  208.74   17.91
   9   4   0  201.91   19.45
  10   4   0   20.00   10.86
 -10  -4   0   21.49   10.25
 -11  -4   0  600.21   38.46
  11   4   0  522.74   40.36
 -12  -4   0  178.57   22.92
 -14  -4   0  156.73   29.32
 -15  -4   0   23.21   19.73
 -16  -4   0    1.58   17.16
 -17  -4   0    3.80   20.68
 -18  -4   0   40.75   23.95
  15  -5   0  124.76   27.55
  14  -5   0   43.94   19.78
  13  -5   0   32.85   18.88
 -13   5   0   44.17   16.25
  12  -5   0  194.38   28.76
 -12   5   0  202.79   22.33
 -11   5   0  197.32   25.16
  11  -5   0  182.21   26.54
 -10   5   0  723.29   46.45
  10  -5   0  671.35   48.84
   9  -5   0   42.45   14.12
  -9   5   0   71.27   13.40
   8  -5   0 1373.90   85.25
  -8   5   0 1481.34   81.42
  -7   5   0  659.14   39.41
   7  -5   0  589.11   41.69
   6  -5   0  778.42   49.10
  -6   5   0  778.63   45.63
  -5   5   0  121.81   10.59
   5  -5   0  112.08   12.40
  -4   5   0  792.44   47.07
   4  -5   0  829.47   46.15
   4  -5   0  954.86   51.68
   3  -5   0  328.47   19.34
  -3   5   0  324.09   18.88
   3  -5   0  311.13   21.70
   2  -5   0 1155.17   56.77
   2  -5   0 1055.57   61.60
   1  -5   0   15.52    3.59
   1  -5   0   24.28    4.22
  -1  -5   0    4.80    2.76
  -2  -5   0 1004.19   52.01
  -3  -5   0  312.57   19.03
   4   5   0  930.12   51.13
  -4  -5   0  918.04   49.44
   5   5   0  121.83   10.23
  -5  -5   0  123.75   10.83
   6   5   0  856.84   49.24
  -6  -5   0  828.23   47.07
  -7  -5   0  642.57   38.19
   7   5   0  629.70   39.58
  -8  -5   0 1435.36   78.61
   8   5   0 1469.55   83.73
   9   5   0   34.62   11.06
  -9  -5   0   49.01   11.26
  10   5   0  677.09   46.47
 -10  -5   0  726.10   44.27
 -11  -5   0  152.14   17.51
  11   5   0  175.40   19.81
 -12  -5   0  184.65   19.90
 -14  -5   0   84.42   24.00
 -15  -5   0   99.45   26.31
 -16  -5   0   90.82   26.15
 -17  -5   0  150.52   31.31
 -18  -5   0  -17.89   19.11
  16  -6   0  227.96   36.78
  15  -6   0   44.98   22.41
  14  -6   0  399.77   38.97
  13  -6   0   71.09   20.67
 -12   6   0  321.72   29.60
  12  -6   0  389.65   34.83
 -11   6   0   97.20   19.23
  11  -6   0  116.47   22.63
  10  -6   0  138.99   21.22
 -10   6   0   75.06   15.82
  -9   6   0   47.25   12.03
   9  -6   0   39.00   13.44
  -8   6   0  133.10   16.16
   8  -6   0   66.61   15.42
  -7   6   0    4.69    7.05
   7  -6   0    7.93    8.85
  -6   6   0  685.90   38.98
   6  -6   0  615.83   42.35
   5  -6   0   37.54    9.22
  -5   6   0   29.17    6.27
  -4   6   0  214.49   13.85
   4  -6   0  212.09   14.58
   4  -6   0  194.38   16.61
   3  -6   0   12.22    4.72
   3  -6   0   17.11    5.87
  -3   6   0   12.62    3.18
   2  -6   0 5234.60  255.30
   2  -6   0 5144.56  275.36
   1  -6   0  483.55   28.27
   1  -6   0  472.09   26.17
   0  -6   0  835.11   44.70
   0  -6   0  786.58   41.94
  -1  -6   0  467.17   25.67
  -2  -6   0 5301.67  260.84
  -3  -6   0   13.83    4.73
  -4  -6   0  196.74   14.16
   4   6   0  199.97   12.92
   5   6   0   36.47    6.39
  -5  -6   0   27.86    6.92
  -6  -6   0  571.07   35.12
   6   6   0  618.59   36.07
  -7  -6   0   13.62    7.73
   7   6   0    9.62    6.99
   8   6   0   70.10   12.77
  -8  -6   0   64.84   13.15
   9   6   0   43.54   11.46
  -9  -6   0   50.50   11.82
  10   6   0   95.45   16.53
 -10  -6   0  152.32   20.12
 -11  -6   0  128.12   19.70
 -12  -6   0  466.18   34.28
 -14  -6   0  319.52   34.43
 -15  -6   0   25.57   17.64
 -16  -6   0  226.46   37.15
 -17  -6   0   24.71   20.68
 -18  -6   0   71.14   26.85
  16  -7   0   17.31   21.18
  15  -7   0  162.23   30.92
  14  -7   0   45.80   19.11
  13  -7   0  189.94   31.64
 -12   7   0  346.99   28.34
  12  -7   0  269.28   30.22
 -11   7   0  156.93   22.82
  11  -7   0  201.95   23.91
  10  -7   0  237.15   25.49
 -10   7   0  294.52   24.07
  -9   7   0    5.50    7.25
   9  -7   0    1.02    9.24
  -8   7   0  155.11   16.22
   8  -7   0  206.94   20.66
  -7   7   0   27.18    8.19
   7  -7   0   25.11   10.43
  -6   7   0  994.34   56.88
   6  -7   0 1032.30   62.28
  -5   7   0  277.72   18.47
   5  -7   0  268.66   22.11
   5  -7   0  302.97   19.81
   4  -7   0    3.53    4.32
   4  -7   0   10.11    6.12
  -4   7   0   11.96    3.68
   3  -7   0   95.07    8.84
  -3   7   0   99.53    7.41
   3  -7   0  119.66   11.11
   2  -7   0 1714.86   89.89
   2  -7   0 1835.74   97.57
   1  -7   0   22.04    5.31
   0  -7   0    7.13    3.60
   0  -7   0    5.30    3.12
  -1  -7   0   21.46    5.10
  -2  -7   0 1797.02   91.15
  -3  -7   0  103.17    9.21
  -4  -7   0   13.63    5.58
   5   7   0  246.90   16.54
  -5  -7   0  267.83   18.31
  -6  -7   0 1040.33   57.69
   6   7   0 1060.09   59.28
   7   7   0    3.40    6.43
  -7  -7   0   17.19    7.90
  -8  -7   0  195.35   17.20
   8   7   0  188.76   16.89
   9   7   0   -4.22    7.22
  -9  -7   0   11.41    8.68
 -10  -7   0  227.82   21.16
  10   7   0  265.64   22.14
 -11  -7   0  178.40   18.93
 -12  -7   0  331.08   27.48
 -15  -7   0  202.77   34.09
 -16  -7   0   34.66   21.28
 -17  -7   0   15.22   19.86
 -18  -7   0  -19.30   21.26
  16  -8   0   97.99   27.74
  15  -8   0   46.44   21.58
  14  -8   0   13.01   17.81
  13  -8   0   16.63   15.78
  12  -8   0   59.78   18.81
  11  -8   0  782.44   59.42
 -11   8   0  942.91   55.79
  10  -8   0   91.35   18.40
 -10   8   0   51.67   13.44
   9  -8   0  154.27   22.58
  -9   8   0  118.27   16.64
   8  -8   0   86.27   16.99
  -8   8   0   79.89   12.75
  -7   8   0  870.29   51.85
   7  -8   0  927.85   57.91
  -6   8   0   13.37    6.23
   6  -8   0   23.89    9.83
   5  -8   0 1073.65   61.63
   5  -8   0  977.91   55.05
  -5   8   0  979.33   55.20
  -4   8   0  135.14    9.24
   4  -8   0  122.54   12.72
   4  -8   0  116.12   10.84
   3  -8   0  304.73   21.73
   3  -8   0  421.49   25.63
   2  -8   0   -0.19    3.51
   1  -8   0 5644.99  277.05
   1  -8   0 5617.67  298.01
   0  -8   0  241.24   15.49
   0  -8   0  244.05   15.79
  -1  -8   0 5659.71  278.26
  -2  -8   0    2.39    3.92
  -3  -8   0  399.39   24.25
  -4  -8   0  134.32   11.21
   5   8   0 1063.26   58.94
  -5  -8   0 1092.74   58.64
   6   8   0   27.99    6.52
  -6  -8   0   13.77    7.75
   7   8   0  909.10   52.82
  -7  -8   0  919.88   52.39
  -8  -8   0  108.65   15.84
   8   8   0   74.34   12.18
  -9  -8   0  122.34   14.36
   9   8   0  112.15   13.30
 -10  -8   0  106.53   18.70
 -11  -8   0  869.81   53.68
 -12  -8   0   57.05   15.62
 -15  -8   0   20.98   19.57
 -16  -8   0   28.97   19.64
 -17  -8   0   17.14   21.07
 -18  -8   0   -9.94   21.17
  17  -9   0   78.27   26.86
  16  -9   0   70.15   24.86
  15  -9   0  176.57   34.66
  14  -9   0   -9.18   15.24
  13  -9   0  223.61   33.85
  12  -9   0   25.80   15.73
  11  -9   0  325.94   31.70
 -10   9   0   55.76   13.39
  10  -9   0   52.42   15.50
   9  -9   0   55.01   15.19
  -9   9   0   86.88   13.31
   8  -9   0  154.76   21.16
  -8   9   0   99.19   12.72
  -7   9   0   13.90    6.88
   7  -9   0   19.07   10.27
   6  -9   0    8.92    8.69
  -6   9   0    1.33    4.72
   6  -9   0    0.71    6.12
   5  -9   0  109.96   13.33
  -5   9   0   97.62    8.93
   5  -9   0  102.76   10.72
   4  -9   0  117.48   10.64
  -4   9   0  103.53    8.26
   4  -9   0  112.27   11.83
   3  -9   0 2944.50  166.38
   3  -9   0 3188.75  154.24
   2  -9   0   32.43    7.06
   2  -9   0    5.93    4.80
  -1  -9   0    3.14    4.17
  -2  -9   0   28.67    5.97
  -3  -9   0 3013.76  151.56
  -4  -9   0   89.07    9.60
  -5  -9   0   74.32   11.07
  -6  -9   0   -3.02    5.85
   6   9   0   -2.48    3.96
  -7  -9   0    4.03    7.95
   7   9   0   11.06    6.22
   8   9   0   98.71   11.66
  -8  -9   0  137.20   17.91
  -9  -9   0   70.64   13.95
 -10  -9   0   57.17   15.08
 -11  -9   0  338.59   28.12
 -12  -9   0   18.38   13.00
 -15  -9   0  163.35   30.29
 -16  -9   0   73.68   25.09
 -17  -9   0   83.78   28.47
  17 -10   0    4.38   19.62
  16 -10   0   62.59   26.96
  15 -10   0   39.67   23.28
  14 -10   0   41.56   20.83
  13 -10   0   83.86   23.41
  12 -10   0  208.88   30.63
  11 -10   0   79.05   19.69
  10 -10   0  115.28   20.62
 -10  10   0   50.07   13.01
   9 -10   0  438.10   35.12
  -9  10   0  392.79   28.49
  -8  10   0  114.92   12.14
   8 -10   0  112.53   18.82
   7 -10   0  394.54   31.43
  -7  10   0  392.29   25.41
   6 -10   0  278.89   22.08
   6 -10   0  390.28   27.78
  -6  10   0  291.40   20.48
   5 -10   0  816.01   52.20
   5 -10   0  828.89   47.11
  -5  10   0  844.73   45.68
   4 -10   0   97.05   10.72
   4 -10   0  111.19   12.42
  -4  10   0  102.86    7.89
   3 -10   0  854.67   48.68
   3 -10   0  927.73   53.40
   2 -10   0  268.10   18.93
   2 -10   0  242.45   17.26
   1 -10   0  709.51   42.48
   1 -10   0  743.88   40.08
   0 -10   0 1799.79   95.71
   0 -10   0 1726.60   89.80
  -1 -10   0  690.91   38.77
  -1 -10   0  719.92   39.42
  -2 -10   0  263.55   17.61
  -3 -10   0  885.10   48.59
  -4 -10   0  110.12   11.01
  -5 -10   0  856.88   48.49
  -6 -10   0  367.29   25.26
   7  10   0  390.66   24.58
  -7 -10   0  401.06   27.49
  -8 -10   0   69.13   13.53
   8  10   0   85.13   10.98
  -9 -10   0  467.12   32.44
 -10 -10   0   93.60   17.96
 -11 -10   0  116.14   21.14
 -12 -10   0  217.62   26.64
 -15 -10   0   48.10   22.53
 -16 -10   0  115.25   28.24
 -17 -10   0  -19.80   16.96
  17 -11   0  -11.65   22.90
  16 -11   0   14.98   21.84
  15 -11   0   -8.22   17.98
  14 -11   0    5.97   15.94
  13 -11   0   44.35   19.25
  12 -11   0  221.28   33.14
  11 -11   0   33.62   17.98
  10 -11   0  220.64   24.99
   9 -11   0   11.20   10.81
  -9  11   0   13.91    7.81
  -8  11   0  451.81   29.93
   8 -11   0  494.08   37.36
   7 -11   0  191.02   16.99
  -7  11   0  173.37   14.42
   7 -11   0  179.68   19.74
   6 -11   0 1080.48   59.00
   6 -11   0 1020.56   64.84
  -6  11   0 1031.07   57.22
  -5  11   0  106.62    8.82
   5 -11   0  117.72   16.65
   5 -11   0   92.88   11.19
   4 -11   0  625.89   38.12
  -4  11   0  638.24   35.46
   4 -11   0  691.24   42.65
   3 -11   0   51.71    9.73
   3 -11   0   34.56    8.21
   2 -11   0  550.63   32.18
   2 -11   0  540.38   34.36
   1 -11   0  631.24   39.52
   1 -11   0  702.33   37.74
  -1 -11   0  646.40   36.57
  -1 -11   0  655.75   36.89
  -2 -11   0  544.55   31.75
  -3 -11   0   52.69    9.23
  -4 -11   0  704.78   40.66
  -5 -11   0  100.09   11.13
  -6 -11   0 1128.78   62.78
  -7 -11   0  177.66   16.72
  -8 -11   0  531.13   35.08
  -9 -11   0   -0.88    8.41
 -10 -11   0  223.88   22.08
 -11 -11   0   45.98   16.40
 -12 -11   0  202.15   21.49
 -15 -11   0   19.38   19.00
 -16 -11   0    8.94   18.57
 -17 -11   0   -6.56   18.66
  17 -12   0  -13.90   20.01
  16 -12   0   45.88   24.07
  15 -12   0   56.75   24.54
  14 -12   0   69.84   23.53
  13 -12   0    8.52   18.06
  12 -12   0   60.30   20.88
  11 -12   0   76.60   21.43
  10 -12   0  188.62   27.38
   9 -12   0   47.28   15.89
   8 -12   0   11.33   11.20
  -8  12   0   19.74    7.25
   7 -12   0   33.63   10.22
   7 -12   0   56.73   14.40
   6 -12   0   28.50    9.59
  -6  12   0   24.35    6.22
   6 -12   0   26.32    9.53
   5 -12   0  165.20   18.40
  -5  12   0  202.66   12.89
   5 -12   0  205.64   16.71
   4 -12   0 1118.64   57.04
   4 -12   0  907.99   60.73
   3 -12   0  110.06   11.41
   3 -12   0  119.61   12.73
   2 -12   0   84.15    9.88
   2 -12   0   97.95   10.57
   1 -12   0 2133.22  108.62
   1 -12   0 2110.90  116.16
   0 -12   0  537.15   31.62
   0 -12   0  557.02   32.84
  -1 -12   0 2132.13  115.46
  -1 -12   0 2167.15  109.84
  -2 -12   0   85.93    9.60
  -3 -12   0  126.53   11.97
  -4 -12   0  954.16   53.29
  -5 -12   0  185.95   16.08
  -6 -12   0    8.59    7.82
  -7 -12   0   52.99   12.60
  -8 -12   0    2.87    8.45
  -9 -12   0   12.37   10.17
 -10 -12   0  186.07   24.30
 -11 -12   0   82.14   17.79
 -12 -12   0   96.48   19.19
 -16 -12   0   50.12   23.45
 -17 -12   0  -16.40   18.43
  17 -13   0   12.67   23.70
  16 -13   0   11.39   20.97
  15 -13   0   56.78   23.98
  14 -13   0   17.90   20.71
  13 -13   0   -0.04   17.48
  12 -13   0   13.95   16.51
  11 -13   0   28.74   15.40
  10 -13   0   55.37   17.92
   9 -13   0   98.10   21.01
   8 -13   0   91.82   18.42
   7 -13   0   18.56    8.95
   7 -13   0   15.87   10.80
  -7  13   0   30.69    6.96
   6 -13   0  484.27   32.92
  -6  13   0  499.38   29.39
   6 -13   0  529.19   37.63
   5 -13   0   -1.09    7.00
   5 -13   0    0.15    6.62
  -5  13   0    5.06    3.63
   4 -13   0 1679.03   95.82
   4 -13   0 1639.61   88.17
   3 -13   0  405.30   26.36
   3 -13   0  386.52   28.03
   2 -13   0   47.72    9.47
   2 -13   0   49.51    9.98
   0 -13   0   12.96    5.25
   0 -13   0   13.99    5.68
  -2 -13   0   41.01    4.63
  -2 -13   0   24.38    7.24
  -3 -13   0  352.22   23.55
  -4 -13   0 1717.96   90.71
  -5 -13   0    1.16    5.42
  -6 -13   0  574.91   36.37
  -7 -13   0   22.88    9.41
  -8 -13   0   97.33   15.84
  -9 -13   0  125.15   19.21
 -10 -13   0   58.57   16.42
 -11 -13   0   37.46   15.47
 -12 -13   0   17.33   13.43
 -13 -13   0    5.14   14.65
 -16 -13   0   55.37   23.95
 -17 -13   0    0.62   16.97
  17 -14   0  -40.14   19.59
  16 -14   0   -4.30   18.09
  15 -14   0   33.30   20.89
  14 -14   0    6.34   19.73
  13 -14   0   28.83   21.55
  12 -14   0   -9.48   13.76
  11 -14   0    7.29   14.17
  10 -14   0   -0.08   12.74
   9 -14   0  296.06   29.64
   8 -14   0   23.71   13.00
   8 -14   0   46.46   12.31
   7 -14   0  115.02   17.49
   7 -14   0  116.33   19.53
   6 -14   0  114.28   19.07
  -6  14   0  141.84   10.65
   6 -14   0  142.60   14.95
   5 -14   0  337.64   27.55
   5 -14   0  335.51   24.62
   4 -14   0   18.88    9.08
   4 -14   0    5.16    6.86
   3 -14   0 1501.80   84.97
   3 -14   0 1429.62   78.69
   2 -14   0  290.43   23.04
   2 -14   0  327.44   22.39
   1 -14   0    3.35    6.41
   1 -14   0   10.37    6.66
   0 -14   0  558.35   32.29
   0 -14   0  514.16   32.78
  -1 -14   0    3.26    5.76
  -2 -14   0  290.62   18.10
  -2 -14   0  301.71   20.92
  -3 -14   0 1509.37   80.31
  -4 -14   0   12.72    7.25
  -5 -14   0  360.98   25.50
  -6 -14   0  147.90   15.21
  -7 -14   0  134.83   17.99
  -8 -14   0   35.35   11.69
  -9 -14   0  301.24   25.08
 -10 -14   0    5.99   11.20
 -11 -14   0   13.02   13.66
 -12 -14   0    3.33   11.93
 -13 -14   0   17.38   14.19
 -16 -14   0   14.87   19.71
 -17 -14   0  -11.15   18.13
  17 -15   0   33.36   25.89
  16 -15   0   -7.61   18.28
  15 -15   0   29.88   21.07
  14 -15   0    3.49   19.61
  13 -15   0  301.09   42.28
  12 -15   0   15.09   15.31
  11 -15   0   16.75   14.45
  10 -15   0   29.63   16.50
   9 -15   0    2.89   12.83
   8 -15   0   -3.41    9.15
   8 -15   0   -6.63    8.06
   7 -15   0   99.63   18.97
   7 -15   0  110.17   16.95
  -6  15   0   49.13    6.91
   6 -15   0   27.60   12.00
   6 -15   0   39.56   11.51
   5 -15   0  841.24   55.86
   5 -15   0  905.74   52.09
   4 -15   0   23.14    9.57
   4 -15   0   41.78   11.26
   3 -15   0  216.22   19.24
   3 -15   0  286.42   21.83
   2 -15   0  485.75   32.72
   2 -15   0  479.98   30.97
   1 -15   0  905.72   50.46
   1 -15   0  879.88   53.08
  -1 -15   0  909.97   49.85
  -1 -15   0  829.93   48.45
  -2 -15   0  509.12   29.68
  -2 -15   0  512.47   31.85
  -3 -15   0  276.08   20.58
  -4 -15   0   44.68   10.49
  -5 -15   0  890.46   51.82
  -6 -15   0   37.88   11.27
  -7 -15   0  102.36   16.25
  -8 -15   0   -5.15    7.70
  -9 -15   0    9.62   11.23
 -10 -15   0    1.66   12.41
 -11 -15   0   11.39   11.78
 -12 -15   0   36.68   16.22
 -13 -15   0  191.25   22.27
 -16 -15   0    0.53   15.89
 -17 -15   0   86.63   27.39
  17 -16   0   10.93   24.56
  16 -16   0   -2.89   19.42
  15 -16   0    8.38   18.87
  14 -16   0   57.52   21.83
  13 -16   0  135.47   29.05
  12 -16   0    5.93   15.13
  11 -16   0   84.68   22.30
  10 -16   0   21.10   15.73
   9 -16   0  519.92   42.47
   8 -16   0   59.63   15.04
   8 -16   0   57.23   16.96
   7 -16   0   19.90   12.12
   7 -16   0   37.45   11.92
   6 -16   0  100.43   16.28
   6 -16   0   86.65   17.21
   5 -16   0  163.99   18.53
   5 -16   0  150.48   16.05
   4 -16   0  413.22   31.38
   4 -16   0  428.35   29.36
   3 -16   0   -6.17    6.13
   3 -16   0   -0.98    6.45
   2 -16   0  240.06   19.79
   2 -16   0  253.67   20.72
   1 -16   0 2667.14  147.00
   1 -16   0 2704.39  137.91
   0 -16   0 2111.24  113.67
   0 -16   0 2022.76  107.14
  -1 -16   0 2654.90  139.94
  -1 -16   0 2528.48  132.63
  -2 -16   0  212.10   18.19
  -2 -16   0  256.55   15.98
  -3 -16   0   -4.94    4.79
  -5 -16   0  149.22   15.33
  -6 -16   0   79.13   14.43
  -7 -16   0   22.36   10.50
  -8 -16   0   62.37   14.67
  -9 -16   0  572.38   39.27
 -10 -16   0   12.64   12.23
 -11 -16   0  115.40   20.64
 -12 -16   0    9.83   13.00
 -13 -16   0  173.97   26.83
 -16 -16   0  -11.95   16.77
 -17 -16   0    3.97   17.97
  16 -17   0   40.27   24.84
  15 -17   0    0.20   18.95
  14 -17   0   30.59   20.64
  13 -17   0    7.87   17.86
  12 -17   0   70.82   22.97
  11 -17   0   -1.22   14.33
  10 -17   0  191.11   29.80
   9 -17   0  136.39   22.05
   9 -17   0  126.07   23.80
   8 -17   0   65.79   18.10
   8 -17   0   85.34   17.70
   7 -17   0   38.84   12.21
   7 -17   0   37.45   14.30
   6 -17   0  207.77   20.60
   6 -17   0  258.51   24.32
   5 -17   0   78.93   15.13
   5 -17   0   84.81   15.86
   4 -17   0  521.63   36.30
   4 -17   0  476.87   33.39
   3 -17   0    8.50    8.24
   3 -17   0    0.62    7.70
   2 -17   0   21.85    8.95
   2 -17   0   25.96    9.82
  -1 -17   0  109.75   12.51
  -2 -17   0   11.56    7.91
  -2 -17   0   36.03    6.70
  -3 -17   0   18.35    8.66
  -4 -17   0  532.74   34.45
  -5 -17   0   81.66   13.23
  -6 -17   0  293.58   23.49
  -7 -17   0   51.94   13.50
  -8 -17   0   96.47   17.58
  -9 -17   0  119.14   19.70
 -10 -17   0  169.00   23.85
 -11 -17   0    4.54   12.67
 -12 -17   0   81.28   20.14
 -13 -17   0   15.01   15.27
 -16 -17   0   13.97   19.48
  16 -18   0  133.44   34.52
  15 -18   0   16.10   22.42
  14 -18   0  176.21   34.94
  13 -18   0   39.65   22.58
  12 -18   0   14.84   17.12
  11 -18   0   37.26   19.01
  10 -18   0   55.31   19.45
   9 -18   0   36.46   17.55
   9 -18   0   15.71   13.41
   8 -18   0  328.68   31.74
   8 -18   0  376.73   29.82
   7 -18   0   20.35   12.08
   7 -18   0   11.32   12.16
   6 -18   0  768.46   46.95
   6 -18   0  669.58   49.65
   5 -18   0  145.52   17.22
   5 -18   0  184.00   19.77
   4 -18   0  450.36   32.78
   4 -18   0  394.62   29.94
   3 -18   0  172.87   17.88
   3 -18   0  186.32   17.47
   2 -18   0  745.43   44.07
   2 -18   0  686.44   45.49
   1 -18   0   14.49    7.57
   1 -18   0   26.90    8.84
   0 -18   0  402.94   27.29
   0 -18   0  391.04   27.03
  -1 -18   0   16.72    8.64
  -1 -18   0   19.30    7.14
  -2 -18   0  725.61   43.85
  -2 -18   0  748.43   42.59
  -3 -18   0  148.82   10.29
  -3 -18   0  141.94   14.77
  -4 -18   0  450.00   30.66
  -5 -18   0  188.65   18.32
  -6 -18   0  684.28   43.20
  -7 -18   0    5.86    9.22
  -8 -18   0  357.26   28.46
  -9 -18   0   11.88   11.40
 -10 -18   0   68.48   17.23
 -11 -18   0   65.45   18.16
 -12 -18   0   11.82   14.81
 -13 -18   0   53.75   18.84
 -16 -18   0  112.54   29.26
  16 -19   0    8.80   23.08
  15 -19   0   28.80   25.23
  14 -19   0   -6.72   18.68
  13 -19   0  150.21   31.87
  12 -19   0  256.53   31.57
  11 -19   0   16.66   16.10
  10 -19   0  219.42   32.76
   9 -19   0   44.97   16.78
   9 -19   0   31.92   14.36
   8 -19   0   73.61   18.84
   8 -19   0   44.89   14.86
   7 -19   0   32.24   14.75
   7 -19   0   18.23   12.27
   6 -19   0  127.68   21.36
   6 -19   0  143.00   21.43
   5 -19   0  751.52   47.91
   5 -19   0  753.31   51.18
   4 -19   0  267.74   22.66
   4 -19   0  246.49   23.19
   3 -19   0    8.34    9.37
   3 -19   0   11.70    9.22
   2 -19   0   45.28   11.37
   2 -19   0   52.67   12.27
   1 -19   0   15.14    9.32
   1 -19   0   10.34    7.53
   0 -19   0   16.05    7.03
   0 -19   0    6.12    6.73
  -1 -19   0   23.18    9.53
  -1 -19   0   11.87    6.93
  -2 -19   0   51.04    8.20
  -2 -19   0   30.45    8.99
  -3 -19   0   15.67    9.06
  -4 -19   0  243.45   20.83
  -5 -19   0  755.84   46.64
  -6 -19   0  126.10   18.37
  -7 -19   0   28.63   12.46
  -8 -19   0   77.13   16.24
  -9 -19   0   29.99   14.08
 -10 -19   0  239.54   23.55
 -11 -19   0   20.39   14.70
 -12 -19   0  275.81   27.32
 -13 -19   0  149.49   26.76
 -16 -19   0   36.48   21.16
  16 -20   0   35.59   26.99
  15 -20   0   28.19   25.19
  14 -20   0    4.39   19.35
  13 -20   0  100.07   28.63
  12 -20   0    9.13   16.10
  11 -20   0   91.41   24.36
  10 -20   0   24.13   17.37
   9 -20   0  712.12   54.68
   9 -20   0  725.85   49.77
   8 -20   0   74.69   19.10
   8 -20   0  101.22   20.95
   7 -20   0   60.74   17.22
   7 -20   0   58.94   17.69
   6 -20   0    5.58   12.02
   6 -20   0   20.55   11.91
   5 -20   0    5.26    9.45
   5 -20   0    3.18    9.82
   4 -20   0    5.62    8.54
   4 -20   0    0.95    9.13
   3 -20   0    8.52    9.72
   3 -20   0   -5.70    8.04
   2 -20   0  313.55   23.62
   2 -20   0  240.83   22.84
   1 -20   0   94.10   15.73
   1 -20   0  102.60   14.91
   0 -20   0   84.15   12.34
   0 -20   0   57.06   13.14
  -1 -20   0   82.07   10.56
  -1 -20   0  117.36   16.03
  -2 -20   0  284.25   20.06
  -2 -20   0  295.38   22.71
  -3 -20   0   -5.24    7.30
  -4 -20   0    0.02    8.85
  -5 -20   0    0.75    7.22
  -6 -20   0   11.26   10.87
  -7 -20   0   94.94   17.83
  -8 -20   0   55.25   16.55
  -9 -20   0  745.62   49.25
 -10 -20   0    6.01   12.74
 -11 -20   0  103.66   21.70
 -12 -20   0    8.19   15.93
 -13 -20   0  101.56   23.45
 -16 -20   0   33.29   21.34
  16 -21   0   12.01   24.10
  15 -21   0   24.43   25.99
  14 -21   0    4.97   20.29
  13 -21   0   20.86   16.90
  12 -21   0   -2.82   17.24
  11 -21   0   23.50   18.76
  10 -21   0   59.21   21.58
   9 -21   0   10.61   15.50
   9 -21   0   27.86   14.03
   8 -21   0   29.55   15.83
   8 -21   0   -1.70   12.23
   7 -21   0  105.34   19.85
   7 -21   0   55.58   18.54
   6 -21   0    2.06   12.01
   6 -21   0   19.73   12.14
   5 -21   0   54.00   15.10
   5 -21   0   42.51   14.79
   4 -21   0   -8.26    8.98
   4 -21   0   -4.31    9.36
   3 -21   0  245.71   21.85
   3 -21   0  224.08   21.76
   2 -21   0    6.05    9.44
   2 -21   0    6.92    9.69
   1 -21   0  224.09   20.58
   1 -21   0  253.73   20.93
   0 -21   0   -6.26    7.95
   0 -21   0    0.41    6.69
  -1 -21   0  215.03   18.91
  -1 -21   0  243.84   18.34
  -2 -21   0    8.67    6.96
  -2 -21   0   15.67    9.57
  -3 -21   0  240.93   20.99
  -4 -21   0   -9.48    8.06
  -5 -21   0   37.50   13.04
  -6 -21   0    3.22    8.07
  -7 -21   0   57.72   15.38
  -8 -21   0   10.01   12.71
  -9 -21   0   -0.19   11.58
 -10 -21   0   71.16   18.25
 -11 -21   0   20.87   14.80
 -12 -21   0   -1.29   14.96
 -13 -21   0   11.56   15.71
 -16 -21   0    9.02   18.72
  15 -22   0  -11.51   20.55
  14 -22   0   35.40   21.64
  13 -22   0  103.30   29.61
  12 -22   0    2.57   18.47
  11 -22   0   54.18   20.07
  10 -22   0   40.03   20.34
   9 -22   0   59.91   19.38
   9 -22   0   61.77   21.01
   8 -22   0  217.05   30.54
   8 -22   0  206.88   23.21
   7 -22   0  114.83   22.24
   7 -22   0  153.00   25.19
   6 -22   0  152.95   24.69
   6 -22   0  186.85   26.15
   5 -22   0  160.91   24.00
   5 -22   0  174.04   24.41
   4 -22   0  157.70   18.45
   4 -22   0  120.23   21.02
   3 -22   0   13.39   10.22
   3 -22   0   18.50   10.76
   2 -22   0   48.69   14.24
   2 -22   0   53.92   13.97
   1 -22   0   64.86   13.38
   1 -22   0   41.39   12.87
   0 -22   0   49.39   11.63
   0 -22   0   38.70   10.38
  -1 -22   0   34.09    9.64
  -1 -22   0   40.82   10.66
  -2 -22   0   47.73    9.82
  -2 -22   0   44.08   12.47
  -3 -22   0   16.53   10.68
  -4 -22   0  124.07   14.72
  -5 -22   0  143.53   18.77
  -6 -22   0  127.27   20.18
  -7 -22   0  124.49   21.29
  -8 -22   0  203.55   22.59
  -9 -22   0   69.62   18.45
 -10 -22   0   92.83   20.44
 -11 -22   0   77.88   20.56
 -12 -22   0   17.51   16.60
 -13 -22   0  143.63   27.02
  15 -23   0    1.30   20.82
  14 -23   0    3.98   21.88
  13 -23   0   -8.45   19.68
  12 -23   0  219.66   39.16
  11 -23   0    1.11   16.80
  10 -23   0   45.13   19.40
   9 -23   0   41.63   17.95
   9 -23   0   53.29   21.06
   8 -23   0    6.84   13.45
   8 -23   0    3.63   14.62
   7 -23   0   -2.08   12.08
   7 -23   0  -13.25   11.47
   6 -23   0  542.25   42.80
   6 -23   0  537.97   40.04
   5 -23   0    1.36   11.30
   5 -23   0   31.95   15.00
   4 -23   0  118.45   20.30
   4 -23   0  109.54   19.59
   3 -23   0  259.86   25.63
   3 -23   0  341.03   26.95
   2 -23   0  184.51   20.05
   2 -23   0  180.91   19.31
   1 -23   0  212.47   20.56
   1 -23   0  248.08   21.80
   0 -23   0   -0.83    8.98
   0 -23   0    1.68    6.96
  -1 -23   0  221.89   19.58
  -1 -23   0  177.26   16.99
  -2 -23   0  154.65   17.14
  -3 -23   0  284.60   24.00
  -4 -23   0   82.39   16.57
  -5 -23   0   11.44   11.59
  -6 -23   0  618.84   41.87
  -7 -23   0   -3.83   10.89
  -8 -23   0    7.14   14.93
  -9 -23   0   49.31   16.91
 -10 -23   0   89.05   20.07
 -11 -23   0   -9.03   12.93
 -12 -23   0  197.38   29.69
 -13 -23   0  -14.52   13.82
  15 -24   0   -7.14   23.52
  14 -24   0   15.79   23.14
  13 -24   0   10.72   20.67
  12 -24   0   10.18   20.26
  11 -24   0  -16.35   14.69
  10 -24   0  -16.48   15.30
   9 -24   0   16.45   17.74
   9 -24   0   12.78   14.79
   8 -24   0    3.70   13.45
   8 -24   0    5.11   13.75
   7 -24   0   -4.52   11.19
   7 -24   0   -8.16   12.87
   6 -24   0   10.47   12.69
   6 -24   0    3.55   13.36
   5 -24   0   -0.55   10.86
   5 -24   0   -9.35   10.83
   4 -24   0   88.59   19.31
   4 -24   0   84.04   18.01
   3 -24   0   70.72   16.76
   3 -24   0   50.70   14.99
   2 -24   0  739.24   47.76
   2 -24   0  749.40   49.88
   1 -24   0   36.00   13.23
   1 -24   0   21.90   10.97
   0 -24   0   64.95   12.40
   0 -24   0   42.64   13.60
  -1 -24   0   34.77   11.93
  -1 -24   0   22.45    9.49
  -2 -24   0  739.83   46.69
  -3 -24   0   84.17   16.15
  -4 -24   0   62.94   15.29
  -5 -24   0   -4.29   10.23
  -6 -24   0    9.33   12.58
  -7 -24   0  -11.48   11.22
  -8 -24   0   -5.28   12.42
  -9 -24   0   29.87   15.74
 -10 -24   0   15.24   15.47
 -11 -24   0  -11.23   12.72
 -12 -24   0    5.24   15.81
 -13 -24   0   15.32   17.52
  15 -25   0  -13.44   23.90
  14 -25   0    4.11   23.97
  13 -25   0    3.07   20.19
  12 -25   0   20.43   20.71
  11 -25   0   -0.91   17.95
  10 -25   0   -5.31   14.50
   9 -25   0  -13.44   13.39
   9 -25   0   -6.47   14.94
   8 -25   0  216.59   32.55
   8 -25   0  261.78   27.68
   7 -25   0    8.66   13.11
   7 -25   0    5.91   14.93
   6 -25   0   23.81   16.52
   6 -25   0   30.00   15.96
   5 -25   0  -11.17   10.72
   5 -25   0  -11.13   10.79
   4 -25   0  167.82   20.37
   4 -25   0  135.63   23.31
   3 -25   0  158.61   19.81
   3 -25   0  211.18   26.13
   2 -25   0  142.56   21.55
   2 -25   0  126.36   20.62
   1 -25   0   51.76   13.37
   1 -25   0   60.15   14.40
   0 -25   0    9.04   10.71
   0 -25   0   13.90    9.07
  -1 -25   0   38.64   13.69
  -2 -25   0  148.07   17.22
  -3 -25   0  166.95   17.51
  -4 -25   0  157.69   18.47
  -5 -25   0  -11.10    7.21
  -6 -25   0   16.20   13.48
  -7 -25   0  -15.51    9.97
  -8 -25   0  209.64   23.41
  -9 -25   0    0.13   11.81
 -10 -25   0   13.95   14.34
 -11 -25   0   -0.21   16.02
 -12 -25   0   -3.39   15.60
 -13 -25   0  -18.38   13.79
  14 -26   0    4.18   24.42
  13 -26   0  106.73   30.02
  12 -26   0   12.53   19.92
  11 -26   0   35.14   22.32
  10 -26   0    8.86   18.18
   9 -26   0  126.13   27.95
   9 -26   0  201.21   30.31
   8 -26   0   35.48   19.01
   8 -26   0   20.32   17.05
   7 -26   0  321.41   32.43
   7 -26   0  309.13   30.92
   6 -26   0   33.04   15.87
   6 -26   0   34.87   17.15
   5 -26   0   23.29   15.10
   5 -26   0   29.23   15.12
   4 -26   0    3.36   12.01
   4 -26   0   24.00   14.53
   3 -26   0   42.94   14.53
   3 -26   0   23.27   12.00
   2 -26   0    1.03   11.05
   2 -26   0   -6.18   10.46
   1 -26   0   26.32   13.22
   1 -26   0   38.86   12.60
   0 -26   0  270.34   22.67
   0 -26   0  260.99   23.86
  -1 -26   0   31.74   13.61
  -2 -26   0   18.02   11.53
  -3 -26   0   25.96   10.95
  -4 -26   0   10.75    9.44
  -5 -26   0   23.64   14.06
  -6 -26   0   20.92   11.52
  -7 -26   0  390.55   32.14
  -8 -26   0   45.67   18.07
  -9 -26   0  161.67   26.33
 -10 -26   0  -23.48   13.13
 -11 -26   0   44.10   19.12
 -12 -26   0   -4.79   16.02
 -13 -26   0   88.28   25.13
  14 -27   0   -3.51   23.72
  13 -27   0   77.91   27.39
  12 -27   0   40.61   23.03
  11 -27   0  -11.14   17.47
  10 -27   0    1.24   19.07
   9 -27   0   41.48   19.65
   8 -27   0    2.38   14.85
   8 -27   0    8.03   17.74
   7 -27   0    4.31   16.30
   7 -27   0   25.91   15.73
   6 -27   0   57.43   20.71
   6 -27   0  117.94   23.32
   5 -27   0  169.92   26.63
   5 -27   0  152.23   26.02
   4 -27   0  -11.06   11.30
   4 -27   0    5.00   12.61
   3 -27   0   31.52   13.81
   3 -27   0   59.05   17.87
   2 -27   0    5.34    9.69
   2 -27   0  -10.42   10.43
   1 -27   0  174.52   18.70
   1 -27   0  194.08   20.82
   0 -27   0   29.13   13.25
  -1 -27   0  180.80   19.83
  -2 -27   0   14.82   11.44
  -3 -27   0   50.25   14.83
  -4 -27   0  -16.55    8.36
  -5 -27   0  157.08   23.49
  -6 -27   0   50.59   16.99
  -7 -27   0   13.89   13.88
  -8 -27   0    3.56   12.85
  -9 -27   0   52.01   18.93
 -10 -27   0   21.50   16.31
 -11 -27   0  -21.13   13.16
 -12 -27   0   33.24   19.57
 -13 -27   0   69.77   22.97
  14 -28   0   -1.21   24.72
  13 -28   0    7.36   23.34
  12 -28   0   11.99   20.47
  11 -28   0   46.52   23.93
  10 -28   0   -0.99   19.04
   9 -28   0  140.84   29.26
   8 -28   0    0.19   15.88
   8 -28   0    9.53   16.74
   7 -28   0  103.30   23.96
   7 -28   0  114.38   26.09
   6 -28   0    3.79   15.13
   6 -28   0  -17.41   11.52
   5 -28   0    8.59   13.92
   5 -28   0   -4.33   13.90
   4 -28   0   -7.94   12.81
   4 -28   0   -9.41   12.41
   3 -28   0  178.48   24.54
   3 -28   0  149.32   24.64
   2 -28   0  138.74   24.24
   2 -28   0  198.60   25.17
   1 -28   0   11.62   12.56
   1 -28   0    2.99   10.18
   0 -28   0   29.25   14.42
  -1 -28   0    3.65   10.84
  -2 -28   0  155.91   22.81
  -4 -28   0    6.53   12.05
  -5 -28   0   26.91   14.24
  -6 -28   0   -7.90   11.89
  -7 -28   0   44.63   17.11
  -8 -28   0    3.05   13.67
  -9 -28   0  176.19   24.99
 -10 -28   0   19.75   16.32
 -11 -28   0   62.42   21.86
 -12 -28   0  -17.06   13.75
 -13 -28   0    1.97   18.56
  13 -29   0   23.38   26.12
  12 -29   0   25.47   24.19
  11 -29   0   16.81   22.12
  10 -29   0  101.01   28.00
   9 -29   0  -11.13   14.91
   8 -29   0  164.35   30.61
   8 -29   0  173.09   30.63
   7 -29   0  124.00   28.07
   7 -29   0   88.27   23.70
   6 -29   0   84.21   23.44
   6 -29   0   69.10   22.39
   5 -29   0   64.70   22.02
   5 -29   0   30.11   17.13
   4 -29   0   69.35   19.98
   4 -29   0   51.55   18.63
   3 -29   0   15.47   14.76
   3 -29   0    7.31   13.36
   2 -29   0   -3.18   12.99
   2 -29   0    0.91   11.41
   1 -29   0    7.72   12.58
   0 -29   0    2.59   10.16
  -1 -29   0    4.48   10.04
  -2 -29   0   -7.84   11.33
  -3 -29   0    3.59   11.98
  -4 -29   0   34.62   16.01
  -5 -29   0   41.43   15.64
  -6 -29   0   44.64   17.88
  -7 -29   0  134.13   22.87
  -9 -29   0    0.96   15.09
 -10 -29   0  116.36   25.71
 -11 -29   0  -17.08   14.42
 -12 -29   0   15.62   20.57
 -13 -29   0    5.25   18.95
 -14 -29   0   47.77   24.40
  13 -30   0   -0.47   24.89
  12 -30   0   29.12   22.79
  11 -30   0    7.52   20.37
  10 -30   0   30.59   21.53
   9 -30   0    9.44   18.31
   8 -30   0    4.20   17.72
   8 -30   0   -4.73   16.70
   7 -30   0  -21.88   12.15
   7 -30   0  -10.71   15.26
   6 -30   0  174.68   28.72
   6 -30   0  160.88   29.34
   5 -30   0   -0.88   15.42
   5 -30   0  -11.93   12.52
   4 -30   0  157.61   25.63
   4 -30   0  197.69   30.00
   3 -30   0   -3.57   11.69
   3 -30   0  -22.68    9.70
   2 -30   0   10.92   15.47
   2 -30   0   31.62   14.62
   1 -30   0    5.17   12.85
   0 -30   0  256.43   25.89
  -1 -30   0   15.31   13.73
  -2 -30   0   -1.80   12.99
  -3 -30   0  -14.51   10.83
  -4 -30   0  169.40   25.34
  -5 -30   0   17.88   11.94
  -6 -30   0  154.12   24.13
  -7 -30   0  -13.54   12.48
  -8 -30   0   19.51   15.77
  -9 -30   0    4.12   15.81
 -10 -30   0   -6.22   15.42
 -11 -30   0   -7.40   16.83
 -12 -30   0   23.48   20.72
 -13 -30   0   19.32   21.04
  13 -31   0   28.06   27.04
  12 -31   0   34.99   27.57
  11 -31   0   -2.39   20.47
  10 -31   0   76.43   27.92
   9 -31   0   16.68   19.52
   8 -31   0  141.41   31.56
   8 -31   0   57.26   23.47
   7 -31   0   -4.87   18.26
   7 -31   0   -6.80   15.95
   6 -31   0   -3.30   16.67
   6 -31   0   -7.68   14.11
   5 -31   0  111.54   23.80
   5 -31   0   72.94   23.45
   4 -31   0  168.32   29.16
   4 -31   0  171.25   26.86
   3 -31   0   -7.25   12.50
   3 -31   0   -7.29   12.23
   2 -31   0   -1.86   14.51
   2 -31   0   -5.13   11.57
   1 -31   0   71.68   20.02
   0 -31   0   13.67   14.58
  -1 -31   0   97.24   21.67
  -2 -31   0  -28.08   10.55
  -3 -31   0   -8.63   11.55
  -4 -31   0  135.04   23.12
  -5 -31   0   78.65   19.36
  -6 -31   0   -4.50   13.00
  -7 -31   0   -2.65   14.68
  -8 -31   0   98.47   22.03
  -9 -31   0    0.57   15.09
 -10 -31   0   42.78   19.31
 -11 -31   0    1.14   16.51
 -12 -31   0    5.02   16.17
 -13 -31   0  -10.96   18.23
  12 -32   0   28.17   25.99
  11 -32   0   36.48   26.64
  10 -32   0  -17.28   18.11
   9 -32   0  185.00   33.61
   8 -32   0   -2.72   19.02
   8 -32   0   -6.14   16.87
   7 -32   0   35.54   20.17
   7 -32   0   21.79   20.88
   6 -32   0  -10.05   16.00
   6 -32   0  -10.99   16.94
   5 -32   0   77.48   23.07
   5 -32   0   98.72   23.43
   4 -32   0   63.00   19.88
   4 -32   0   80.18   22.52
   3 -32   0   13.00   16.13
   3 -32   0   13.08   14.93
   2 -32   0   92.11   22.73
   1 -32   0    4.88   11.64
   0 -32   0   32.75   16.89
  -1 -32   0    6.70   14.48
  -2 -32   0   54.90   18.53
  -3 -32   0    4.59   13.63
  -4 -32   0   64.02   18.57
  -5 -32   0   72.09   19.11
  -6 -32   0   17.00   15.22
  -7 -32   0   24.60   16.92
  -8 -32   0    1.14   14.98
  -9 -32   0  110.72   22.08
 -10 -32   0  -20.59   13.05
 -11 -32   0   20.69   20.02
 -12 -32   0   -4.91   16.72
 -13 -32   0   -7.03   18.98
  12 -33   0   21.15   25.20
  11 -33   0   11.73   22.36
  10 -33   0  -12.69   18.22
   9 -33   0   -2.32   18.91
   8 -33   0    4.99   17.45
   8 -33   0  -10.11   18.58
   7 -33   0   46.97   23.31
   7 -33   0   60.83   22.55
   6 -33   0  -11.65   15.56
   6 -33   0   -3.80   16.48
   5 -33   0   60.06   22.51
   5 -33   0   58.12   20.45
   4 -33   0   13.78   16.05
   4 -33   0   16.92   17.90
   3 -33   0  240.45   33.17
   2 -33   0   -6.03   14.25
   1 -33   0   54.76   19.90
   0 -33   0  -16.76   11.48
  -1 -33   0   49.83   19.27
  -2 -33   0   17.84   15.00
  -3 -33   0  140.38   25.13
  -4 -33   0   27.13   15.97
  -5 -33   0   23.95   15.73
  -6 -33   0   -8.62   14.27
  -7 -33   0   89.76   22.42
  -8 -33   0  -23.70   13.41
  -9 -33   0   -1.05   16.27
 -10 -33   0   12.94   18.46
 -11 -33   0   22.35   19.18
 -12 -33   0  -22.93   17.85
  12 -34   0   11.70   26.11
  11 -34   0  123.59   33.84
  10 -34   0  -22.25   18.11
   9 -34   0   -6.85   19.30
   8 -34   0  -14.32   17.93
   7 -34   0  158.95   33.20
   7 -34   0  112.07   28.22
   6 -34   0   62.32   21.87
   6 -34   0   11.23   18.74
   5 -34   0  158.79   30.70
   5 -34   0  170.37   29.39
   4 -34   0    5.91   15.06
   4 -34   0   29.19   18.73
   3 -34   0   39.08   20.05
   2 -34   0   18.08   17.15
   1 -34   0   98.40   23.43
   0 -34   0  -12.58   13.72
  -1 -34   0   93.46   22.40
  -2 -34   0    2.72   12.25
  -3 -34   0   27.96   16.80
  -4 -34   0    8.58   14.60
  -5 -34   0  131.22   24.21
  -6 -34   0   27.00   16.92
  -7 -34   0  137.95   25.73
  -8 -34   0  -22.94   14.13
  -9 -34   0   -9.11   15.49
 -10 -34   0   10.65   18.82
 -11 -34   0   75.97   24.46
 -12 -34   0   16.34   22.24
  11 -35   0   57.85   30.32
  10 -35   0   33.26   25.64
   9 -35   0   26.17   21.94
   8 -35   0   80.08   26.25
   7 -35   0   25.70   20.62
   7 -35   0   25.71   23.05
   6 -35   0   41.63   23.33
   6 -35   0   -1.10   18.94
   5 -35   0   24.67   19.43
   5 -35   0   40.95   19.48
   4 -35   0  100.19   26.73
   3 -35   0  224.00   33.37
   2 -35   0   19.38   18.33
   1 -35   0  130.54   26.42
   0 -35   0  -18.32   12.38
  -1 -35   0   90.52   20.36
  -2 -35   0    1.70   13.67
  -3 -35   0  170.88   27.35
  -4 -35   0   43.61   18.75
  -5 -35   0   34.02   17.34
  -6 -35   0    7.77   15.34
  -7 -35   0   22.19   15.50
  -8 -35   0   92.25   24.01
  -9 -35   0    2.44   17.27
 -10 -35   0   34.73   20.90
 -11 -35   0   79.88   24.40
  11 -36   0   -7.83   24.05
  10 -36   0   16.03   23.00
   9 -36   0   -0.63   22.03
   8 -36   0    5.36   20.50
   7 -36   0    3.09   19.85
   7 -36   0    6.35   21.30
   6 -36   0    8.30   19.05
   6 -36   0   -0.54   19.98
   5 -36   0    8.49   18.09
   5 -36   0   22.44   19.22
   4 -36   0  105.19   26.98
   3 -36   0   44.74   20.17
   2 -36   0  171.51   31.11
   1 -36   0   38.56   20.37
   0 -36   0  170.19   25.79
  -1 -36   0   10.39   14.53
  -2 -36   0  170.98   28.70
  -3 -36   0   39.11   18.08
  -4 -36   0   62.35   20.76
  -5 -36   0   16.56   16.45
  -6 -36   0   13.90   17.04
  -7 -36   0   -0.37   14.57
  -8 -36   0   -9.46   15.23
  -9 -36   0  -22.58   15.27
 -10 -36   0   13.79   18.68
 -11 -36   0    2.45   17.38
  10 -37   0   -8.37   22.26
   9 -37   0  -16.15   18.74
   8 -37   0   20.02   23.45
   7 -37   0   42.42   24.17
   7 -37   0   15.04   24.52
   6 -37   0  114.69   29.39
   6 -37   0   56.74   25.48
   5 -37   0   -5.47   19.78
   4 -37   0  129.22   28.81
   3 -37   0   80.87   24.32
   2 -37   0   69.30   22.70
   1 -37   0   33.03   19.71
   0 -37   0    2.58   15.79
  -1 -37   0   43.99   20.06
  -2 -37   0   46.44   19.71
  -3 -37   0   45.26   18.91
  -4 -37   0  127.12   25.92
  -5 -37   0   16.91   17.54
  -6 -37   0   87.81   23.37
  -7 -37   0   14.32   16.54
  -8 -37   0   17.31   17.52
  -9 -37   0  -19.75   15.32
 -10 -37   0   26.95   18.65
  10 -38   0   -0.51   23.03
   9 -38   0   -5.91   21.31
   8 -38   0   -4.65   21.03
   7 -38   0   60.15   28.30
   7 -38   0  109.54   30.37
   6 -38   0  -14.72   17.13
   6 -38   0  -35.39   17.58
   5 -38   0  136.67   31.60
   4 -38   0   -7.12   16.60
   3 -38   0   45.66   21.63
   2 -38   0   21.69   18.65
   1 -38   0   92.34   25.01
   0 -38   0   52.66   21.23
  -1 -38   0  102.96   24.88
  -2 -38   0   41.76   20.24
  -3 -38   0   37.58   16.01
  -4 -38   0   31.48   18.65
  -5 -38   0   75.49   23.27
  -6 -38   0   -5.45   14.57
  -7 -38   0   83.33   22.87
  -8 -38   0    5.38   14.79
  -9 -38   0  -15.29   15.08
 -10 -38   0  -26.28   15.49
   9 -39   0    4.77   21.91
   8 -39   0   -2.12   21.34
   7 -39   0   13.95   25.04
   7 -39   0   31.94   23.12
   6 -39   0  -26.25   21.22
   5 -39   0   -4.98   19.04
   4 -39   0   13.75   20.87
   3 -39   0  187.76   33.86
   2 -39   0   12.67   16.86
   1 -39   0  219.04   34.46
   0 -39   0   -7.83   15.81
  -1 -39   0  160.12   29.08
  -2 -39   0   31.61   19.40
  -3 -39   0  141.67   26.66
  -4 -39   0    5.80   16.47
  -5 -39   0   -1.09   15.06
  -6 -39   0  -22.37   14.02
  -7 -39   0    8.04   17.01
  -8 -39   0  -11.26   15.60
  -9 -39   0  -11.82   14.44
   8 -40   0   -1.38   21.98
   6 -40   0   -2.35   21.88
   5 -40   0   37.17   24.69
   4 -40   0    1.52   16.97
   3 -40   0   45.06   22.04
   2 -40   0   42.28   21.81
   1 -40   0   33.28   19.50
   0 -40   0   42.51   20.22
  -1 -40   0   14.06   15.15
  -2 -40   0   48.15   20.74
  -3 -40   0   43.25   20.43
  -4 -40   0   -8.58   16.11
  -5 -40   0   26.13   18.79
  -6 -40   0   -6.03   14.95
  -7 -40   0   46.56   21.86
  -8 -40   0   -3.15   16.29
   8 -41   0   35.87   26.41
   6 -41   0   12.92   23.71
   5 -41   0   21.49   23.08
   4 -41   0   44.46   23.68
   3 -41   0   17.45   20.81
   2 -41   0   11.90   18.78
   1 -41   0   10.33   18.50
   0 -41   0   12.61   19.54
  -1 -41   0    8.70   17.47
  -2 -41   0   14.51   18.07
  -3 -41   0    2.36   17.36
  -4 -41   0   34.48   20.42
  -5 -41   0    1.10   18.01
  -6 -41   0   13.41   15.61
  -7 -41   0   -4.75   18.12
  -8 -41   0   43.37   21.96
   6 -42   0   19.47   25.01
   5 -42   0    1.82   20.76
   4 -42   0   22.65   21.06
   3 -42   0   16.57   21.76
   2 -42   0   37.83   21.80
   1 -42   0  -20.61   17.03
   0 -42   0  150.14   31.20
  -1 -42   0  -27.09   15.52
  -2 -42   0   10.07   17.06
  -3 -42   0  -14.72   16.20
  -4 -42   0   18.90   19.61
  -5 -42   0  -12.24   15.33
  -6 -42   0   -6.74   14.79
  -7 -42   0    0.56   18.66
   6 -43   0   -1.41   24.88
   5 -43   0   23.23   22.92
   4 -43   0   31.53   24.24
   3 -43   0    7.50   21.45
   2 -43   0   -4.00   19.04
   1 -43   0   20.82   20.13
   0 -43   0    7.06   19.59
  -1 -43   0    9.74   19.49
  -2 -43   0  -13.20   13.86
  -3 -43   0   -1.01   18.32
  -4 -43   0    2.09   19.23
  -5 -43   0   10.48   18.72
  -6 -43   0   15.05   16.21
   4 -44   0    3.01   21.52
   3 -44   0   -7.19   19.51
   2 -44   0    5.61   18.69
   1 -44   0   -0.62   17.91
   0 -44   0   29.78   19.94
  -1 -44   0    7.48   19.78
  -2 -44   0   -1.03   18.17
  -3 -44   0  -23.14   16.14
  -4 -44   0   16.66   19.91
   3 -45   0    3.83   20.90
   2 -45   0  -18.92   18.30
   1 -45   0   26.39   22.17
   0 -45   0    4.76   19.41
  -1 -45   0   58.21   24.36
  -2 -45   0    2.57   18.71
  -3 -45   0   10.88   19.67
  -3 -45   1   20.68   19.18
  -2 -45   1    4.48   18.57
  -1 -45   1    9.19   17.67
   0 -45   1   -0.77   18.83
   1 -45   1  -16.38   18.57
   2 -45   1   -8.76   19.60
  -4 -44   1   42.31   22.45
  -3 -44   1   36.63   21.18
  -2 -44   1   21.17   20.13
  -1 -44   1   10.03   18.83
   0 -44   1   40.47   22.43
   1 -44   1  -10.13   16.91
   2 -44   1  -14.69   17.69
   3 -44   1   -6.81   21.25
   4 -44   1  -17.37   20.84
  -6 -43   1   -2.00   16.98
  -5 -43   1   17.19   19.01
  -4 -43   1   13.87   18.00
  -3 -43   1   25.66   20.07
  -2 -43   1   -0.97   17.95
  -1 -43   1   42.63   22.02
   0 -43   1   -3.31   17.27
   1 -43   1   25.44   21.98
   2 -43   1  -29.83   16.70
   3 -43   1   -7.21   18.94
   4 -43   1   -5.16   19.94
   5 -43   1   -8.66   21.72
  -7 -42   1   27.79   18.22
  -6 -42   1   -1.51   16.99
  -5 -42   1   35.80   20.52
  -4 -42   1   -5.12   16.43
  -3 -42   1  -10.37   17.40
  -2 -42   1  -13.50   16.74
  -1 -42   1  -16.90   16.05
   0 -42   1    4.06   18.70
   1 -42   1   11.55   19.25
   2 -42   1   31.99   20.97
   3 -42   1   12.15   22.06
   4 -42   1  -23.47   18.08
   5 -42   1    2.58   21.24
  -8 -41   1   11.24   19.13
  -7 -41   1   -0.27   15.72
  -6 -41   1   -4.70   17.52
  -5 -41   1  -18.30   15.32
  -4 -41   1  -10.66   15.41
  -3 -41   1    6.66   17.93
  -2 -41   1    6.49   17.53
  -1 -41   1   26.74   19.41
   0 -41   1    3.53   17.95
   1 -41   1   59.62   24.04
   2 -41   1    6.62   17.78
   3 -41   1   99.15   27.71
   4 -41   1  -14.95   17.59
   5 -41   1  -14.17   20.32
  -9 -40   1   -9.42   16.99
  -8 -40   1   -8.79   17.17
  -7 -40   1   -1.42   16.41
  -6 -40   1   20.89   18.44
  -5 -40   1   -0.27   15.57
  -4 -40   1   19.43   17.71
  -3 -40   1   -1.18   17.50
  -2 -40   1   16.66   17.50
  -1 -40   1   47.02   21.32
   0 -40   1  177.85   31.62
   1 -40   1    8.80   17.04
   2 -40   1   44.64   22.05
   3 -40   1   28.55   21.18
   4 -40   1    7.69   19.43
   5 -40   1   38.64   25.47
   6 -40   1    8.85   22.20
   7 -40   1   97.07   30.02
   8 -40   1    4.84   22.74
  -9 -39   1  -20.51   16.07
  -8 -39   1   37.73   19.80
  -7 -39   1  -14.84   15.94
  -6 -39   1    8.68   16.22
  -5 -39   1   17.24   15.14
  -4 -39   1   45.00   20.10
  -3 -39   1   12.87   16.91
  -2 -39   1   39.11   18.17
  -1 -39   1   -9.38   14.73
   0 -39   1  -12.09   13.92
   1 -39   1  -19.44   15.48
   2 -39   1   51.94   21.82
   3 -39   1   19.85   20.18
   4 -39   1  139.55   30.33
   5 -39   1    3.87   20.73
   6 -39   1   71.61   27.73
   7 -39   1    8.79   21.99
   8 -39   1   82.88   28.98
   9 -39   1   -7.44   22.00
 -10 -38   1  -24.67   16.02
  -9 -38   1  -22.28   14.81
  -8 -38   1   -7.27   15.76
  -7 -38   1   12.09   16.69
  -6 -38   1   -7.26   14.06
  -5 -38   1  -10.31   10.39
  -4 -38   1   25.42   17.74
  -3 -38   1    1.36   15.75
  -2 -38   1   63.86   21.03
  -1 -38   1    2.46   13.23
   0 -38   1  115.92   26.08
   1 -38   1   22.86   19.49
   2 -38   1  160.51   30.10
   3 -38   1   44.81   20.59
   4 -38   1   56.12   23.60
   5 -38   1    1.68   19.66
   6 -38   1   38.55   23.82
   6 -38   1   39.87   22.07
   7 -38   1   21.29   22.10
   8 -38   1   -9.53   19.31
   9 -38   1  -12.49   22.10
 -10 -37   1   -5.23   16.87
  -9 -37   1  -14.47   13.93
  -8 -37   1    7.05   16.19
  -7 -37   1   14.35   17.44
  -6 -37   1    3.58   12.08
  -5 -37   1   -2.79   13.32
  -4 -37   1   13.51   13.84
  -3 -37   1  105.04   23.35
  -2 -37   1   24.81   17.79
  -1 -37   1  105.87   24.43
   0 -37   1    3.78   16.22
   1 -37   1  102.08   24.72
   2 -37   1    5.31   17.17
   3 -37   1  181.94   31.65
   4 -37   1    5.26   17.52
   5 -37   1   12.43   19.69
   6 -37   1   98.79   27.71
   6 -37   1   51.14   24.94
   7 -37   1    5.24   20.20
   8 -37   1   44.28   23.85
   9 -37   1    6.32   20.66
  10 -37   1   24.10   24.98
 -11 -36   1  107.10   26.46
 -10 -36   1    3.77   15.89
  -9 -36   1    0.71   17.06
  -8 -36   1    0.71   14.86
  -7 -36   1   60.48   20.67
  -6 -36   1    7.38   14.56
  -5 -36   1   84.73   21.50
  -4 -36   1    2.06   12.17
  -3 -36   1   40.81   17.96
  -2 -36   1   10.88   15.66
  -1 -36   1  144.33   27.33
   0 -36   1   -8.57   15.96
   1 -36   1   92.61   24.87
   2 -36   1   -4.35   15.25
   3 -36   1   33.60   18.59
   4 -36   1    9.07   18.91
   5 -36   1   67.17   26.74
   5 -36   1   93.63   24.45
   6 -36   1   29.72   21.37
   6 -36   1   45.21   24.14
   7 -36   1  270.36   39.69
   8 -36   1    2.94   20.24
   9 -36   1   -7.25   20.62
  10 -36   1   20.23   24.66
 -11 -35   1   50.14   22.76
 -10 -35   1  -18.58   16.23
  -9 -35   1   -5.55   16.69
  -8 -35   1    6.72   16.44
  -7 -35   1   38.97   18.10
  -6 -35   1   -0.92   14.56
  -5 -35   1    1.51   13.65
  -4 -35   1   42.13   15.50
  -3 -35   1  212.61   30.31
  -2 -35   1    3.90   14.75
  -1 -35   1   51.43   19.42
   0 -35   1   -6.54   14.87
   1 -35   1   18.56   18.47
   2 -35   1   20.46   18.51
   3 -35   1   80.43   22.97
   4 -35   1  120.13   27.26
   4 -35   1  110.13   26.05
   5 -35   1   -5.03   17.04
   5 -35   1   -1.03   15.88
   6 -35   1   17.68   19.83
   6 -35   1   28.11   21.10
   7 -35   1  107.22   28.63
   7 -35   1   86.94   26.11
   8 -35   1   -6.15   19.91
   9 -35   1   -3.26   21.24
  10 -35   1    5.48   20.83
  11 -35   1   34.07   26.53
 -12 -34   1   47.20   23.56
 -11 -34   1  -13.99   16.14
 -10 -34   1   12.99   19.49
  -9 -34   1   52.04   20.93
  -8 -34   1   17.21   18.60
  -7 -34   1   47.42   17.48
  -6 -34   1    2.88   14.98
  -5 -34   1   50.25   18.57
  -4 -34   1  208.32   24.06
  -3 -34   1   20.95   16.00
  -2 -34   1  116.78   23.60
  -1 -34   1   -6.00   13.42
   0 -34   1   17.93   15.77
   1 -34   1  -13.67   14.40
   2 -34   1  116.40   24.83
   3 -34   1    4.65   16.06
   4 -34   1   11.39   15.51
   4 -34   1   29.27   19.39
   5 -34   1   13.20   16.07
   5 -34   1    4.47   17.47
   6 -34   1  -13.64   16.08
   6 -34   1   -9.93   16.99
   7 -34   1    6.23   18.74
   7 -34   1   24.70   22.31
   8 -34   1  -10.96   18.31
   9 -34   1   51.06   23.51
  10 -34   1  -11.70   19.77
  11 -34   1    8.48   23.60
 -12 -33   1   28.11   20.42
 -11 -33   1    0.34   18.84
 -10 -33   1   13.38   17.93
  -9 -33   1    9.49   16.22
  -7 -33   1   22.16   17.09
  -6 -33   1   22.00   16.78
  -5 -33   1   -2.57   12.91
  -4 -33   1   99.82   21.58
  -3 -33   1   75.59   20.02
  -2 -33   1  -14.22   13.18
  -1 -33   1   -6.78   12.94
   0 -33   1   13.13   15.58
   1 -33   1  -10.24   12.34
   2 -33   1  -15.40   14.01
   3 -33   1    7.36   15.80
   3 -33   1    9.53   15.31
   4 -33   1  114.40   24.27
   4 -33   1  117.54   25.83
   5 -33   1   32.66   20.96
   5 -33   1   90.38   23.08
   6 -33   1   38.65   21.70
   6 -33   1   39.68   21.54
   7 -33   1  -12.15   15.70
   7 -33   1    1.72   20.83
   8 -33   1   80.64   25.35
   9 -33   1  -10.40   16.79
  10 -33   1  130.40   31.74
  11 -33   1    2.02   21.76
  12 -33   1   16.86   25.24
 -13 -32   1   -9.65   17.62
 -12 -32   1   49.99   20.62
 -11 -32   1   37.43   22.11
 -10 -32   1  -12.47   12.88
  -9 -32   1    2.96   14.13
  -8 -32   1   -6.93   12.78
  -7 -32   1   23.98   17.34
  -6 -32   1   36.60   17.27
  -5 -32   1   40.48   17.18
  -4 -32   1  204.95   28.44
  -3 -32   1   23.04   15.59
  -2 -32   1  -15.19   12.83
  -1 -32   1   38.50   16.53
   0 -32   1  156.99   25.92
   1 -32   1  164.31   26.69
   2 -32   1    6.61   15.07
   3 -32   1   29.02   16.58
   3 -32   1   18.03   15.97
   4 -32   1   36.85   17.34
   4 -32   1   52.68   19.87
   5 -32   1    5.16   15.36
   5 -32   1   -0.70   15.61
   6 -32   1   96.60   26.16
   6 -32   1  113.82   26.50
   7 -32   1   36.67   20.62
   7 -32   1   62.47   25.00
   8 -32   1    6.22   18.37
   9 -32   1   22.22   20.39
  10 -32   1   22.39   22.75
  11 -32   1    4.92   22.07
  12 -32   1   18.28   25.61
 -13 -31   1   86.12   27.63
 -12 -31   1  -16.26   17.61
 -11 -31   1   16.79   17.42
 -10 -31   1   24.03   20.20
  -9 -31   1   13.29   17.15
  -8 -31   1   20.41   16.55
  -7 -31   1   77.35   20.62
  -6 -31   1   28.90   13.82
  -5 -31   1  169.15   25.78
  -4 -31   1   58.16   18.14
  -3 -31   1   89.78   20.28
  -2 -31   1  -23.20   11.08
  -1 -31   1   90.47   19.35
   0 -31   1   11.00   14.27
   1 -31   1   65.37   19.32
   2 -31   1  -18.87   11.92
   2 -31   1  -18.60   10.12
   3 -31   1   49.14   17.92
   3 -31   1   64.93   18.87
   4 -31   1    9.26   14.17
   4 -31   1   -7.56   13.68
   5 -31   1   11.96   15.36
   5 -31   1   23.18   16.76
   6 -31   1   54.70   22.08
   6 -31   1   83.13   22.11
   7 -31   1   31.85   18.02
   7 -31   1   48.47   21.83
   8 -31   1   93.88   25.94
   9 -31   1   24.22   20.78
  10 -31   1   24.50   22.32
  11 -31   1    2.92   23.96
  12 -31   1    5.00   23.25
  13 -31   1   -6.17   22.47
 -13 -30   1   -4.93   17.89
 -12 -30   1   25.05   20.88
 -11 -30   1   68.45   23.10
 -10 -30   1  -10.73   17.09
  -9 -30   1  196.08   30.51
  -8 -30   1    2.44   13.86
  -7 -30   1   46.91   15.48
  -6 -30   1   21.44   15.25
  -5 -30   1  112.16   19.73
  -4 -30   1   46.85   16.64
  -3 -30   1    4.47   13.01
  -2 -30   1    2.24   12.51
  -1 -30   1   24.94   12.55
   0 -30   1   16.36   12.30
   1 -30   1   22.98   15.12
   2 -30   1  -15.98   12.11
   2 -30   1   -0.46   12.38
   3 -30   1   90.43   19.74
   3 -30   1   70.84   20.33
   4 -30   1  120.80   24.62
   4 -30   1  177.05   27.14
   5 -30   1  112.10   24.70
   5 -30   1  111.54   23.60
   6 -30   1   -7.66   14.47
   6 -30   1  -18.83   11.39
   7 -30   1   81.43   24.88
   7 -30   1  132.54   27.37
   8 -30   1    4.56   16.91
   9 -30   1   90.79   25.79
  10 -30   1   -7.34   16.87
  11 -30   1   51.77   26.81
  12 -30   1  -20.05   17.89
  13 -30   1   73.58   30.42
 -14 -29   1  -30.74   15.92
 -13 -29   1   25.56   21.01
 -12 -29   1   -5.12   16.10
 -11 -29   1   -7.48   16.91
 -10 -29   1   72.73   21.73
  -9 -29   1   10.68   14.77
  -8 -29   1  207.43   29.55
  -7 -29   1   12.44   14.68
  -6 -29   1   -4.32   12.72
  -5 -29   1   33.43   16.41
  -4 -29   1   36.16   15.53
  -3 -29   1   28.70   14.65
  -2 -29   1   51.35   16.08
  -1 -29   1   38.63   15.54
   0 -29   1   21.12   13.66
   1 -29   1  405.51   31.95
   1 -29   1  359.76   31.70
   2 -29   1    2.44   13.73
   2 -29   1   10.45   13.03
   3 -29   1  203.05   26.83
   3 -29   1  180.39   27.28
   4 -29   1  195.44   28.05
   4 -29   1  134.44   24.62
   5 -29   1  411.45   35.19
   5 -29   1  361.13   35.05
   6 -29   1  -12.08   14.02
   6 -29   1    3.28   15.99
   7 -29   1  -10.53   15.94
   7 -29   1   13.05   15.77
   8 -29   1    9.71   16.55
   9 -29   1   40.77   21.31
  10 -29   1   20.59   20.87
  11 -29   1  -15.80   17.81
  12 -29   1    2.66   20.78
  13 -29   1  101.52   31.15
 -14 -28   1   91.93   26.30
 -13 -28   1   -6.75   19.38
 -12 -28   1   47.82   21.39
 -11 -28   1  -13.65   14.46
 -10 -28   1   -1.45   14.69
  -9 -28   1   -3.30   14.16
  -8 -28   1   88.86   20.87
  -7 -28   1    9.39   14.15
  -6 -28   1   37.47   15.68
  -5 -28   1   69.14   17.83
  -4 -28   1  122.85   19.59
  -3 -28   1   41.19   13.34
  -2 -28   1   46.81   14.93
  -1 -28   1   54.21   16.63
   0 -28   1  235.88   23.29
   1 -28   1   18.32   11.23
   1 -28   1   33.29   14.31
   2 -28   1  182.79   25.80
   2 -28   1  149.47   23.38
   3 -28   1    0.72   10.89
   3 -28   1    6.95   12.54
   4 -28   1   52.29   17.19
   4 -28   1   18.34   14.24
   5 -28   1   41.21   17.60
   5 -28   1   14.22   15.14
   6 -28   1  126.65   25.43
   6 -28   1   93.28   23.11
   7 -28   1  176.47   29.74
   7 -28   1   84.95   24.47
   8 -28   1   98.67   25.26
   9 -28   1  242.16   36.22
  10 -28   1   33.32   21.03
  11 -28   1   27.28   21.23
  12 -28   1    6.03   21.22
  13 -28   1   30.62   24.48
 -14 -27   1   -1.62   19.73
 -13 -27   1   34.45   20.72
 -12 -27   1   46.01   21.65
 -11 -27   1  -14.43   14.50
 -10 -27   1   66.46   21.51
  -9 -27   1   -6.83   14.83
  -8 -27   1  187.40   27.66
  -7 -27   1   43.14   15.87
  -6 -27   1  273.06   25.29
  -5 -27   1   45.63   15.26
  -3 -27   1   -0.44   10.37
  -2 -27   1  110.97   18.83
  -1 -27   1   11.70   11.54
   0 -27   1   58.12   13.55
   0 -27   1   48.13   15.38
   1 -27   1   67.68   15.69
   1 -27   1   43.91   15.56
   2 -27   1   99.26   20.38
   2 -27   1  115.56   19.30
   3 -27   1   79.29   17.47
   3 -27   1   45.30   16.74
   4 -27   1  258.38   26.33
   4 -27   1  234.92   24.89
   5 -27   1    0.16   12.75
   5 -27   1  -19.12   10.73
   6 -27   1   58.35   20.26
   6 -27   1   64.90   20.67
   7 -27   1  -27.82   12.20
   7 -27   1   -5.15   14.42
   8 -27   1  315.33   34.85
   8 -27   1  369.17   34.52
   9 -27   1   22.17   18.20
  10 -27   1  206.94   35.28
  11 -27   1    5.24   19.17
  12 -27   1   45.44   24.67
  13 -27   1   40.19   24.85
  14 -27   1   45.02   28.14
 -14 -26   1   -5.48   18.16
 -13 -26   1  -12.50   15.77
 -12 -26   1   -8.42   14.47
 -11 -26   1   36.26   19.54
 -10 -26   1   16.05   14.67
  -9 -26   1   60.56   18.68
  -8 -26   1   67.75   18.75
  -7 -26   1   40.45   16.69
  -6 -26   1   17.52   14.03
  -5 -26   1   -8.86    9.81
  -4 -26   1    4.12   11.49
  -3 -26   1    6.04   10.14
  -2 -26   1  298.43   25.55
  -1 -26   1   19.89   11.84
   0 -26   1   14.98   10.45
   0 -26   1   33.38   12.75
   1 -26   1   28.21   12.91
   1 -26   1   30.33   12.08
   2 -26   1  919.27   58.92
   2 -26   1  985.35   61.79
   3 -26   1  147.77   23.60
   3 -26   1  170.50   23.71
   4 -26   1  109.04   20.79
   4 -26   1  153.99   23.79
   5 -26   1   22.09   13.82
   5 -26   1   15.43   13.34
   6 -26   1  -10.23   13.80
   6 -26   1    6.45   13.40
   7 -26   1    6.58   14.48
   7 -26   1   -2.47   13.43
   8 -26   1   20.45   17.97
   8 -26   1   14.24   14.99
   9 -26   1   30.76   19.18
  10 -26   1  124.41   27.65
  11 -26   1   -1.98   17.76
  12 -26   1   48.38   22.78
  13 -26   1   30.33   24.62
  14 -26   1   32.66   25.62
 -14 -25   1  -26.57   12.85
 -13 -25   1   38.70   19.83
 -12 -25   1  110.27   24.15
 -11 -25   1  -15.71   11.16
 -10 -25   1  -10.28   13.73
  -9 -25   1   51.01   19.39
  -8 -25   1  -14.66   11.87
  -7 -25   1   -6.42   11.44
  -6 -25   1  201.98   21.86
  -5 -25   1   -4.86   10.32
  -4 -25   1    3.97   10.52
  -3 -25   1   37.63   12.81
  -2 -25   1  181.20   19.04
  -1 -25   1  182.17   18.66
  -1 -25   1  166.27   16.57
   0 -25   1   53.30   12.46
   0 -25   1   44.51   11.91
   1 -25   1  671.24   45.53
   1 -25   1  678.70   44.56
   2 -25   1   33.54   13.88
   2 -25   1   40.59   13.79
   3 -25   1  156.72   19.45
   3 -25   1  178.92   20.37
   4 -25   1   -4.64   10.83
   4 -25   1   22.95   13.44
   5 -25   1  285.69   28.42
   5 -25   1  290.76   27.05
   6 -25   1  214.78   29.76
   6 -25   1  219.61   29.57
   7 -25   1  105.05   22.96
   7 -25   1   56.35   19.38
   8 -25   1   83.55   21.89
   8 -25   1  110.96   25.62
   9 -25   1  107.57   25.33
  10 -25   1   31.80   18.68
  11 -25   1   16.91   20.03
  12 -25   1   61.04   25.38
  13 -25   1   88.57   30.39
  14 -25   1    6.05   21.76
 -14 -24   1    6.05   17.54
 -13 -24   1   81.46   22.93
 -12 -24   1    7.02   16.32
 -11 -24   1   33.45   17.59
 -10 -24   1   31.39   15.26
  -9 -24   1   17.88   14.05
  -8 -24   1   -8.49   12.70
  -7 -24   1  155.75   23.93
  -6 -24   1    7.26   12.04
  -5 -24   1  110.36   19.85
  -4 -24   1   90.22   15.04
  -3 -24   1   50.33   13.95
  -2 -24   1  167.28   21.24
  -1 -24   1  121.94   18.55
  -1 -24   1  130.22   14.34
   0 -24   1  231.04   21.07
   0 -24   1  255.32   22.08
   1 -24   1   32.86   10.96
   2 -24   1   99.05   18.51
   2 -24   1   86.04   17.66
   3 -24   1   31.17   13.24
   3 -24   1   24.66   11.86
   4 -24   1    6.71   11.72
   4 -24   1   13.73   12.45
   5 -24   1   87.76   19.46
   5 -24   1  142.98   23.08
   6 -24   1   71.73   19.43
   6 -24   1   37.88   16.33
   7 -24   1  468.88   36.89
   7 -24   1  436.07   39.18
   8 -24   1   75.94   20.13
   8 -24   1  103.03   24.17
   9 -24   1  247.70   35.64
  10 -24   1   15.12   18.01
  11 -24   1  148.47   30.20
  12 -24   1  -11.83   15.93
  13 -24   1   59.79   26.33
  14 -24   1   14.22   23.42
  15 -24   1   12.16   24.29
 -14 -23   1   11.95   17.94
 -13 -23   1    3.26   14.48
 -12 -23   1   22.85   16.20
 -11 -23   1   66.83   20.33
 -10 -23   1   -4.39   13.31
  -9 -23   1  -26.49   11.15
  -8 -23   1   -1.94   12.18
  -7 -23   1    3.13   12.18
  -6 -23   1   -8.80   10.08
  -5 -23   1    3.39   10.78
  -4 -23   1   -5.40    9.59
  -3 -23   1  231.46   20.58
  -2 -23   1  113.51   16.39
  -1 -23   1  118.71   13.17
  -1 -23   1  121.96   18.15
   0 -23   1  116.18   13.63
   0 -23   1   94.66   16.97
   1 -23   1  601.91   39.80
   1 -23   1  608.28   41.30
   2 -23   1   80.43   16.85
   2 -23   1   98.40   17.22
   3 -23   1  896.82   55.68
   3 -23   1  899.81   58.71
   4 -23   1  161.99   18.92
   4 -23   1  147.94   18.99
   5 -23   1  142.27   23.07
   5 -23   1  145.93   23.01
   6 -23   1  115.76   22.51
   6 -23   1  128.51   21.64
   7 -23   1   47.93   17.33
   7 -23   1   34.13   15.76
   8 -23   1  325.80   33.55
   8 -23   1  342.59   30.34
   9 -23   1   33.06   18.99
  10 -23   1   19.21   16.50
  11 -23   1   76.16   24.12
  12 -23   1   33.90   21.83
  13 -23   1   47.06   24.54
  14 -23   1    6.95   19.72
  15 -23   1   73.47   31.90
 -14 -22   1  -31.25   13.85
 -13 -22   1    9.63   17.72
 -12 -22   1   -4.66   13.82
 -11 -22   1  -12.96   12.55
 -10 -22   1   78.61   18.40
  -9 -22   1  193.46   26.85
  -8 -22   1   66.41   17.35
  -7 -22   1  184.96   20.18
  -6 -22   1  152.87   21.82
  -5 -22   1   -7.41    9.60
  -4 -22   1  -17.30    7.79
  -3 -22   1   41.79   12.55
  -2 -22   1  323.16   23.19
  -2 -22   1  344.03   26.01
  -1 -22   1  100.07   12.52
  -1 -22   1  118.23   17.50
   0 -22   1   13.35    8.14
   0 -22   1    9.51    9.82
   1 -22   1   10.71    9.74
   1 -22   1   15.37    9.52
   2 -22   1  977.18   56.72
   2 -22   1  892.04   59.03
   3 -22   1   64.15   15.98
   3 -22   1   89.86   17.27
   4 -22   1  539.12   37.55
   4 -22   1  491.81   38.59
   5 -22   1   -0.78   10.60
   5 -22   1   -0.46   10.64
   6 -22   1   17.63   13.57
   6 -22   1   56.57   15.18
   7 -22   1   -6.88   10.92
   7 -22   1   -2.11   11.83
   8 -22   1   62.65   19.56
   8 -22   1   73.48   18.90
   9 -22   1  136.73   24.90
  10 -22   1   22.33   18.57
  11 -22   1   99.00   26.08
  12 -22   1   36.65   19.76
  13 -22   1   23.49   20.54
  14 -22   1   18.56   22.85
  15 -22   1   11.64   23.04
 -14 -21   1   -4.54   16.32
 -13 -21   1  -15.77   15.64
 -12 -21   1   86.08   21.80
 -11 -21   1   -4.86   12.55
 -10 -21   1  206.23   28.36
  -9 -21   1  -16.21   12.43
  -8 -21   1   83.11   19.19
  -7 -21   1    4.20    9.26
  -6 -21   1  348.64   27.17
  -5 -21   1  277.89   24.14
  -4 -21   1   32.31   11.85
  -3 -21   1   13.58   10.04
  -2 -21   1   99.73   16.69
  -2 -21   1  146.41   12.87
  -1 -21   1   43.84   12.03
  -1 -21   1   20.76    8.71
   0 -21   1  116.18   15.30
   0 -21   1   82.20   14.91
   1 -21   1   47.45   12.24
   1 -21   1   35.62   10.80
   2 -21   1  375.49   27.95
   2 -21   1  361.36   28.76
   3 -21   1   55.40   14.31
   3 -21   1   54.82   14.85
   4 -21   1  495.09   39.13
   4 -21   1  581.53   38.17
   5 -21   1   -6.42    9.78
   5 -21   1   -5.16    8.90
   6 -21   1  333.65   30.62
   6 -21   1  314.70   27.32
   7 -21   1   54.60   18.07
   7 -21   1   25.17   13.72
   8 -21   1  192.37   28.28
   8 -21   1  173.51   25.71
   9 -21   1  -18.39   13.23
  10 -21   1  224.95   34.02
  11 -21   1   10.18   16.26
  12 -21   1  425.02   42.88
  13 -21   1   25.21   21.24
  14 -21   1   -0.14   22.16
  15 -21   1  -16.83   21.21
 -14 -20   1   47.51   20.03
 -13 -20   1   26.51   18.71
 -12 -20   1   10.47   16.14
 -11 -20   1   16.42   14.79
 -10 -20   1  250.43   25.14
  -9 -20   1   58.21   18.02
  -8 -20   1   52.44   16.57
  -7 -20   1   -2.27    9.89
  -6 -20   1  343.43   27.30
  -5 -20   1   69.24   13.29
  -4 -20   1  398.61   28.92
  -3 -20   1    7.23    5.46
  -3 -20   1   -8.16    5.45
  -2 -20   1  422.09   27.51
  -2 -20   1  423.93   29.58
  -1 -20   1  119.78   12.41
  -1 -20   1  116.14   13.70
   0 -20   1   14.45    7.52
   0 -20   1    8.26    7.09
   1 -20   1   25.04   10.15
   1 -20   1   29.73   10.46
   2 -20   1  252.93   22.77
   2 -20   1  278.15   22.30
   3 -20   1   60.25   14.73
   3 -20   1   62.49   14.13
   4 -20   1  152.68   17.74
   4 -20   1  182.64   20.17
   5 -20   1   13.99   10.56
   5 -20   1   12.16   11.58
   6 -20   1  117.44   19.16
   6 -20   1   79.48   19.01
   7 -20   1   64.74   17.96
   7 -20   1   42.39   15.79
   8 -20   1  401.69   37.04
   8 -20   1  448.16   33.94
   9 -20   1   63.03   18.22
  10 -20   1   12.29   17.22
  11 -20   1  160.98   29.75
  12 -20   1   63.43   23.07
  13 -20   1   86.62   25.99
  14 -20   1  125.22   31.29
  15 -20   1   27.68   23.17
  16 -20   1  246.79   44.71
 -14 -19   1  -23.54   13.67
 -13 -19   1    3.61   14.80
 -12 -19   1   -8.47   13.02
 -11 -19   1  161.14   24.99
 -10 -19   1  381.27   31.59
  -9 -19   1   20.93   13.58
  -8 -19   1   63.14   14.31
  -7 -19   1    2.29   10.47
  -6 -19   1   54.20   13.79
  -5 -19   1  268.81   22.68
  -4 -19   1  152.54   16.35
  -3 -19   1  226.71   19.24
  -3 -19   1  209.46   14.99
  -2 -19   1   -3.43    5.59
  -2 -19   1   -5.24    5.56
  -1 -19   1  153.34   13.46
  -1 -19   1  110.53   13.46
   0 -19   1  119.89   13.04
   0 -19   1  113.38   15.47
   1 -19   1  323.09   23.03
   1 -19   1  263.87   22.88
   2 -19   1   28.33   10.67
   2 -19   1   38.86   11.17
   3 -19   1  441.09   33.08
   3 -19   1  431.87   30.80
   4 -19   1   56.60   14.12
   4 -19   1   31.18   12.38
   5 -19   1   57.62   15.80
   5 -19   1   42.86   12.93
   6 -19   1    7.55   12.82
   6 -19   1   -4.21    8.88
   7 -19   1   62.28   17.65
   7 -19   1   62.71   15.78
   8 -19   1   40.24   14.90
   8 -19   1   51.17   17.03
   9 -19   1  134.10   21.42
   9 -19   1   29.43   17.25
  10 -19   1   33.22   19.31
  11 -19   1   28.89   17.10
  12 -19   1   40.93   19.21
  13 -19   1   81.32   26.81
  14 -19   1   12.97   22.30
  15 -19   1  136.34   32.50
  16 -19   1   69.77   28.81
 -14 -18   1   38.47   19.26
 -13 -18   1   17.21   16.09
 -12 -18   1  -15.76   13.02
 -11 -18   1   11.56   14.53
 -10 -18   1   42.90   15.89
  -9 -18   1  949.13   58.83
  -8 -18   1  -15.52    8.93
  -7 -18   1  348.58   27.48
  -6 -18   1   96.53   16.55
  -5 -18   1  189.05   18.34
  -4 -18   1   -9.74    6.08
  -3 -18   1  529.32   31.09
  -3 -18   1  538.64   34.45
  -2 -18   1   -0.81    5.58
  -2 -18   1    1.67    7.30
  -1 -18   1  680.64   41.84
  -1 -18   1  705.09   41.43
   0 -18   1  438.45   29.16
   0 -18   1  416.22   28.21
   1 -18   1   39.84    9.78
   2 -18   1    5.54    8.63
   2 -18   1   12.01    8.52
   3 -18   1  133.16   15.33
   3 -18   1  160.37   20.34
   4 -18   1   52.10   13.01
   4 -18   1   32.76   12.22
   5 -18   1  171.40   18.22
   5 -18   1  218.24   21.88
   6 -18   1    0.84    8.92
   6 -18   1   -8.86    9.81
   7 -18   1   -3.13    9.11
   7 -18   1  -11.65    9.40
   8 -18   1   -1.84   11.10
   8 -18   1    8.09   11.19
   9 -18   1  910.04   56.12
   9 -18   1  867.95   63.02
  10 -18   1   30.12   17.21
  11 -18   1  129.34   26.59
  12 -18   1   21.03   17.82
  13 -18   1  202.41   35.35
  14 -18   1   -1.94   18.90
  15 -18   1   53.13   27.23
  16 -18   1   21.36   23.46
 -14 -17   1   21.55   17.16
 -13 -17   1  148.67   25.88
 -12 -17   1   19.93   14.91
 -11 -17   1   -6.23   11.36
 -10 -17   1  100.51   19.70
  -9 -17   1   58.47   16.20
  -8 -17   1   49.65   14.85
  -7 -17   1    0.56    8.39
  -6 -17   1  349.28   26.51
  -5 -17   1  618.48   39.43
  -4 -17   1   57.77   11.16
  -3 -17   1  161.71   15.38
  -3 -17   1  197.22   12.66
  -2 -17   1   22.17    7.91
  -1 -17   1 1178.19   65.77
  -1 -17   1 1129.54   63.45
   0 -17   1  468.66   30.25
   0 -17   1  480.95   31.30
   1 -17   1 1508.44   85.83
   1 -17   1 1486.02   80.31
   3 -17   1   10.49    7.86
   3 -17   1    6.19    8.02
   4 -17   1  683.51   42.39
   4 -17   1  675.86   46.02
   5 -17   1 1070.99   69.31
   5 -17   1 1142.24   64.00
   6 -17   1   83.05   17.83
   6 -17   1   69.05   14.66
   7 -17   1  -13.67    7.55
   7 -17   1  -10.55    8.10
   8 -17   1   23.22   11.79
   8 -17   1   21.38   12.87
   9 -17   1   11.56   11.85
  10 -17   1   57.19   20.17
  11 -17   1    8.42   15.96
  12 -17   1  251.92   30.85
  13 -17   1  256.00   38.72
  14 -17   1    4.84   20.09
  15 -17   1   38.98   23.88
  16 -17   1   62.49   29.69
 -17 -16   1   -5.90   18.10
 -14 -16   1  191.73   29.13
 -13 -16   1   15.17   14.79
 -12 -16   1  -12.10   11.67
 -11 -16   1  -14.14   10.13
 -10 -16   1   86.87   18.67
  -9 -16   1   37.29   14.42
  -8 -16   1   -9.56    8.58
  -7 -16   1   11.93    9.24
  -6 -16   1  264.91   21.95
  -5 -16   1   94.31   15.20
  -4 -16   1   -3.76    5.38
  -3 -16   1  416.76   24.61
  -3 -16   1  422.67   28.22
  -2 -16   1  991.14   56.46
  -2 -16   1 1028.81   56.72
  -1 -16   1   39.65    9.74
   0 -16   1  226.71   17.77
   0 -16   1  215.06   17.41
   1 -16   1   20.63    8.76
   2 -16   1 2209.54  114.36
   2 -16   1 2174.62  122.66
   3 -16   1  192.19   18.40
   3 -16   1  199.38   17.24
   4 -16   1  622.00   38.81
   4 -16   1  610.43   42.23
   5 -16   1  838.63   51.93
   5 -16   1  935.78   58.30
   6 -16   1  337.53   24.87
   6 -16   1  267.99   26.59
   7 -16   1  163.09   20.85
   7 -16   1  175.55   17.78
   8 -16   1  246.51   26.30
   8 -16   1  247.42   22.31
   9 -16   1  233.53   31.41
  10 -16   1    6.54   13.88
  11 -16   1   17.39   16.48
  12 -16   1   59.02   21.12
  13 -16   1   26.87   20.29
  14 -16   1  107.00   29.11
  15 -16   1   -2.04   19.78
  16 -16   1  201.08   40.45
 -17 -15   1  -10.15   17.89
 -14 -15   1   23.55   17.77
 -13 -15   1  -13.97   12.45
 -12 -15   1    3.27   12.46
 -11 -15   1   -5.97   11.29
 -10 -15   1  220.17   22.17
  -9 -15   1   70.05   16.12
  -8 -15   1   26.35   11.82
  -7 -15   1   27.55   10.64
  -6 -15   1  688.19   42.78
  -5 -15   1   -4.19    6.81
  -4 -15   1  525.92   33.39
  -3 -15   1  211.79   17.52
  -3 -15   1  212.56   13.61
  -2 -15   1 1492.23   79.92
  -2 -15   1 1428.07   77.84
  -1 -15   1 1095.58   62.41
  -1 -15   1 1210.37   65.12
   0 -15   1  596.90   33.35
   0 -15   1  489.46   33.70
   1 -15   1   38.66    9.70
   2 -15   1  381.46   28.66
   2 -15   1  433.90   27.71
   3 -15   1   70.51   12.72
   3 -15   1   55.76   10.88
   4 -15   1  863.44   53.39
   4 -15   1  785.98   47.97
   5 -15   1    9.62   10.17
   5 -15   1    0.58    7.45
   6 -15   1  573.07   41.47
  -6  15  -1  574.42   32.90
   6 -15   1  538.16   36.15
   7 -15   1    7.74   10.84
   7 -15   1   14.94    9.78
   8 -15   1  468.80   37.70
   8 -15   1  436.75   32.00
   9 -15   1   39.62   15.01
  10 -15   1   91.43   21.29
  11 -15   1    1.69   12.90
  12 -15   1   34.22   17.99
  13 -15   1    9.74   17.44
  14 -15   1   11.28   19.73
  15 -15   1    2.78   20.00
  16 -15   1   30.53   25.62
  17 -15   1    9.03   23.11
 -17 -14   1   12.02   20.08
 -13 -14   1    6.47   13.35
 -12 -14   1   13.15   14.33
 -11 -14   1   12.92   12.41
 -10 -14   1   64.70   15.93
  -9 -14   1  160.25   21.85
  -8 -14   1  125.97   18.50
  -7 -14   1   -5.64    7.17
  -6 -14   1    1.23    7.54
  -5 -14   1  257.32   20.47
  -4 -14   1  250.27   19.52
  -3 -14   1  185.00   16.00
  -2 -14   1  908.31   49.66
  -2 -14   1  866.28   49.42
  -1 -14   1   28.57    6.30
  -1 -14   1   14.13    6.64
   0 -14   1  994.97   59.57
   0 -14   1 1089.57   56.83
   1 -14   1 2663.73  135.36
   1 -14   1 2659.20  145.44
   2 -14   1   22.40    8.12
   2 -14   1   16.65    7.77
   3 -14   1   19.49    8.06
   3 -14   1   25.82    8.90
   4 -14   1  611.64   43.82
   4 -14   1  729.68   40.95
   5 -14   1  108.41   16.93
  -5  14  -1   67.91    8.56
   5 -14   1  104.56   15.11
   6 -14   1   42.81   13.50
   6 -14   1   48.32   11.54
  -6  14  -1   74.14    9.27
   7 -14   1    0.98   10.39
  -7  14  -1    7.57    5.62
   7 -14   1   -4.19    6.63
   8 -14   1   12.20   12.08
   8 -14   1    1.95    9.12
   9 -14   1  206.61   24.53
  10 -14   1   48.16   17.93
  11 -14   1   -0.58   13.77
  12 -14   1  152.87   27.55
  13 -14   1  126.07   28.09
  14 -14   1   91.20   27.08
  15 -14   1   33.27   22.56
  16 -14   1    2.37   22.53
  17 -14   1   14.80   23.65
 -17 -13   1    7.67   19.31
 -13 -13   1  176.44   25.44
 -12 -13   1   32.26   15.16
 -11 -13   1   65.31   16.84
 -10 -13   1  137.19   21.20
  -9 -13   1   17.22   10.82
  -8 -13   1  233.66   20.42
  -7 -13   1  381.43   27.54
  -6 -13   1  358.05   25.72
  -5 -13   1   42.44    9.51
  -4 -13   1   99.49   13.71
  -3 -13   1   16.77    7.62
  -2 -13   1  747.03   41.06
  -2 -13   1  712.46   41.39
  -1 -13   1  327.53   21.97
  -1 -13   1  347.90   21.66
   0 -13   1  438.41   28.02
   0 -13   1  443.20   26.90
   1 -13   1 3192.03  170.98
   1 -13   1 3123.49  158.85
   2 -13   1  652.23   38.64
   2 -13   1  685.72   42.12
   3 -13   1   48.57   10.48
   3 -13   1   13.70    6.98
   4 -13   1  256.06   19.90
   4 -13   1  293.83   23.60
  -5  13  -1 1399.91   73.06
   5 -13   1 1406.75   74.13
   5 -13   1 1277.00   81.00
   6 -13   1  239.81   22.78
   6 -13   1  220.90   19.00
   7 -13   1   39.17   14.26
   7 -13   1   36.31   11.06
  -7  13  -1   55.63    9.22
   8 -13   1  118.93   21.28
  -8  13  -1  125.51   12.87
   9 -13   1   50.83   16.49
  10 -13   1   99.19   21.84
  11 -13   1   -3.36   12.78
  12 -13   1   15.14   16.77
  13 -13   1  304.48   34.31
  14 -13   1   -5.87   17.77
  15 -13   1   24.06   21.18
  16 -13   1   16.69   25.17
  17 -13   1   -3.59   22.28
 -17 -12   1   -9.12   18.08
 -13 -12   1  160.74   25.67
 -12 -12   1  182.54   25.49
 -11 -12   1   36.00   14.50
 -10 -12   1  -16.46    8.94
  -9 -12   1  534.48   36.41
  -8 -12   1   56.21   12.89
  -7 -12   1  365.09   26.51
  -6 -12   1   -1.16    6.68
  -5 -12   1  853.06   49.21
  -4 -12   1  222.70   17.28
  -3 -12   1 1197.64   64.68
  -2 -12   1    8.90    3.66
  -2 -12   1    5.62    5.29
  -1 -12   1 1031.42   56.26
  -1 -12   1  981.09   54.18
   0 -12   1  195.14   15.92
   0 -12   1  257.68   16.43
   1 -12   1 1161.06   64.79
   1 -12   1 1090.42   59.79
   2 -12   1   99.44   10.18
   2 -12   1   92.80   10.94
   3 -12   1 1188.33   69.31
   3 -12   1 1159.65   63.24
  -4  12  -1  209.00   14.11
   4 -12   1  206.18   19.45
   4 -12   1  224.85   17.11
   5 -12   1 1509.84   80.80
  -5  12  -1 1487.77   80.79
   5 -12   1 1543.69   89.45
  -6  12  -1  705.97   38.63
   6 -12   1  646.92   45.24
   6 -12   1  626.24   39.59
   7 -12   1  348.97   26.22
   7 -12   1  424.78   32.42
  -7  12  -1  366.08   24.77
   8 -12   1   19.69   11.81
  -8  12  -1   13.89    7.00
   9 -12   1  701.41   51.09
  10 -12   1    2.88   12.65
  11 -12   1  178.79   29.00
  12 -12   1    3.16   14.30
  13 -12   1   21.90   16.75
  14 -12   1  -10.34   16.44
  15 -12   1    5.43   18.25
  16 -12   1   16.58   21.31
  17 -12   1   -8.09   21.37
 -17 -11   1   25.50   22.02
 -13 -11   1  183.56   26.24
 -12 -11   1   -5.08   11.12
 -11 -11   1  298.35   26.56
 -10 -11   1  -14.09    8.84
  -9 -11   1   -5.20    8.31
  -8 -11   1   32.98   10.76
  -7 -11   1   73.72   13.57
  -7 -11   1   61.97    7.66
  -6 -11   1   30.13    5.24
  -6 -11   1   38.89    9.85
  -5 -11   1   12.06    7.22
  -4 -11   1 1391.92   74.43
  -3 -11   1 1682.72   87.89
  -2 -11   1 1483.82   78.32
  -2 -11   1 1514.62   80.70
  -1 -11   1 3277.84  171.83
  -1 -11   1 3171.69  161.45
   0 -11   1  976.17   51.48
   0 -11   1  949.52   54.49
   1 -11   1   23.99    6.58
   2 -11   1   42.79    8.13
   2 -11   1   49.21    8.99
   3 -11   1 1336.98   69.52
   3 -11   1 1281.30   75.78
  -4  11  -1 1048.17   58.45
   4 -11   1 1118.24   65.77
   4 -11   1 1097.44   59.03
   5 -11   1   53.66   10.78
   5 -11   1   82.67   12.95
  -5  11  -1   61.84    8.60
  -6  11  -1  219.06   16.99
   6 -11   1  284.97   23.68
   6 -11   1  203.37   17.79
  -7  11  -1  280.66   19.60
   7 -11   1  254.19   24.83
  -8  11  -1  476.66   30.84
   8 -11   1  467.40   37.27
   9 -11   1   21.97   12.13
  -9  11  -1   17.87    8.85
  10 -11   1   42.06   16.74
  11 -11   1   56.92   19.13
  12 -11   1   52.97   18.91
  13 -11   1   94.52   24.72
  14 -11   1    1.86   16.16
  15 -11   1  130.94   31.66
  16 -11   1   -4.70   19.41
  17 -11   1   22.00   23.14
 -18 -10   1    2.31   21.59
 -17 -10   1   -2.09   18.74
 -13 -10   1   45.76   15.96
 -12 -10   1   88.35   19.04
 -11 -10   1  699.26   46.30
 -10 -10   1   87.38   17.48
  -9 -10   1  134.01   15.40
  -8 -10   1    4.53    6.07
  -8 -10   1    4.82    8.89
  -7 -10   1 1199.63   65.57
  -7 -10   1 1153.92   65.81
  -6 -10   1   60.53    7.30
  -6 -10   1   46.40   10.74
  -5 -10   1   21.95    7.71
  -4 -10   1  177.12   14.62
  -3 -10   1   -1.61    4.18
  -2 -10   1  859.03   46.89
  -1 -10   1  455.13   26.67
  -1 -10   1  451.42   26.63
   0 -10   1  963.51   50.91
   0 -10   1  956.59   54.07
   1 -10   1 2370.45  116.84
   1 -10   1 2260.39  125.81
   2 -10   1    8.40    5.04
   2 -10   1   10.46    5.24
  -3  10  -1  225.77   15.07
   3 -10   1  281.91   20.39
   3 -10   1  234.84   16.79
   4 -10   1  184.98   18.06
   4 -10   1  241.20   16.78
  -4  10  -1  250.54   15.09
  -5  10  -1  125.03   10.51
   5 -10   1  132.01   12.19
   5 -10   1  114.70   14.51
  -6  10  -1  286.65   19.69
   6 -10   1  248.12   23.73
   6 -10   1  317.56   21.47
  -7  10  -1  100.66   11.41
   7 -10   1  128.60   19.51
  -8  10  -1    5.26    6.67
   8 -10   1   12.80   11.12
   9 -10   1    9.63   10.75
  -9  10  -1   11.81    8.32
  10 -10   1  116.36   21.94
 -10  10  -1  102.71   16.91
  11 -10   1  212.51   26.09
  12 -10   1  187.62   30.35
  13 -10   1    3.43   15.48
  14 -10   1   68.89   23.07
  15 -10   1    4.03   19.90
  16 -10   1  101.01   29.54
  17 -10   1   26.35   25.23
 -18  -9   1  -13.92   18.52
 -17  -9   1   -3.01   18.54
 -16  -9   1   21.46   19.52
 -13  -9   1   44.81   15.71
 -12  -9   1  624.73   43.30
 -11  -9   1  151.83   22.74
 -10  -9   1  323.48   26.31
   9   9  -1   -1.08    6.58
  -9  -9   1   -6.05    7.79
   8   9  -1  732.77   44.19
  -8  -9   1  752.87   45.41
  -7  -9   1  279.04   21.72
  -6  -9   1  793.32   46.27
  -6  -9   1  803.53   45.13
  -5  -9   1  111.17    8.62
  -5  -9   1  119.54   11.92
  -4  -9   1  319.60   21.19
  -3  -9   1  282.96   18.82
  -2  -9   1  188.42   13.75
  -1  -9   1   53.31    5.70
  -1  -9   1   52.11    6.20
   0  -9   1  545.18   33.32
   0  -9   1  593.40   31.73
   1  -9   1 1372.98   77.75
   1  -9   1 1427.21   72.00
   2  -9   1 2066.71  108.77
   2  -9   1 1868.59   99.78
   3  -9   1  380.35   23.30
   3  -9   1  394.60   26.88
  -3   9  -1  383.36   22.26
  -4   9  -1  157.22   11.49
   4  -9   1  173.17   15.88
   4  -9   1  149.84   12.54
   5  -9   1  287.41   20.10
  -5   9  -1  309.84   19.54
   5  -9   1  295.37   23.58
   6  -9   1 2081.01  104.24
   6  -9   1 1936.77  114.52
  -6   9  -1 1984.82  107.12
  -7   9  -1   -4.50    4.99
   7  -9   1   -2.90    7.87
  -8   9  -1  161.34   15.33
   8  -9   1  187.32   20.81
   9  -9   1    8.34   10.62
  -9   9  -1    5.76    7.11
 -10   9  -1  171.68   18.51
  10  -9   1  192.89   26.53
  11  -9   1   25.26   15.72
 -11   9  -1   15.66   12.56
  12  -9   1  227.91   28.29
  13  -9   1   -9.27   14.23
  14  -9   1  -10.23   14.76
  15  -9   1    0.58   17.27
  16  -9   1    2.42   19.35
  17  -9   1   -8.71   18.38
 -18  -8   1   28.47   24.21
 -17  -8   1   15.35   18.83
 -16  -8   1  252.98   39.17
 -13  -8   1  107.95   20.84
 -12  -8   1  503.81   37.06
 -11  -8   1  173.61   20.30
 -10  -8   1   69.50   15.61
   9   8  -1   25.07    8.98
  -9  -8   1   30.67   11.58
   8   8  -1  363.05   25.45
  -8  -8   1  382.20   27.29
  -7  -8   1  102.73   14.74
   7   8  -1   76.79    9.68
  -6  -8   1   40.80    9.28
  -5  -8   1  739.84   41.36
  -5  -8   1  737.78   42.24
  -4  -8   1   68.18    9.70
  -3  -8   1  139.51   11.59
  -2  -8   1  426.21   25.15
  -1  -8   1  372.15   21.54
  -1  -8   1  361.45   21.70
   0  -8   1  231.10   14.48
   0  -8   1  212.68   14.97
   1  -8   1   80.58    8.54
   1  -8   1   95.42    7.87
   2  -8   1 1458.32   74.07
   2  -8   1 1427.81   80.68
   3  -8   1   53.49    6.43
  -3   8  -1   57.67    5.89
   3  -8   1   66.09   10.14
   4  -8   1  177.16   13.07
   4  -8   1  164.72   15.80
  -4   8  -1  178.58   12.40
   5  -8   1  825.98   44.59
  -5   8  -1  782.61   45.10
   5  -8   1  790.14   50.35
  -6   8  -1  127.13   12.96
   6  -8   1  191.42   18.33
  -7   8  -1  240.50   18.52
   7  -8   1  220.70   21.79
   8  -8   1  -10.13    8.97
  -8   8  -1   -4.80    6.06
  -9   8  -1  282.99   23.13
   9  -8   1  295.69   27.35
  10  -8   1   39.58   14.44
 -10   8  -1    7.57   10.10
 -11   8  -1   34.81   14.37
  11  -8   1   15.02   15.15
  12  -8   1  115.68   23.99
  13  -8   1    4.92   14.17
  14  -8   1   25.32   21.28
  15  -8   1   10.75   18.28
  16  -8   1   55.54   27.33
 -18  -7   1   -3.71   20.10
 -17  -7   1  146.58   30.97
 -16  -7   1   42.15   23.05
 -13  -7   1  181.27   25.69
 -12  -7   1  403.60   31.72
 -11  -7   1  800.81   50.85
  10   7  -1  506.24   34.96
 -10  -7   1  500.26   34.90
  -9  -7   1   67.10   13.67
   9   7  -1   46.14   10.92
  -8  -7   1 1854.57   97.56
   8   7  -1 1782.80  101.38
   7   7  -1   73.07   10.62
  -6  -7   1  112.25   11.71
   6   7  -1  105.67    9.80
  -5  -7   1   76.29    9.07
  -4  -7   1   16.72    5.71
  -3  -7   1 2776.84  139.53
  -2  -7   1  765.76   41.35
  -1  -7   1 6271.39  307.81
   0  -7   1 7705.34  409.54
   0  -7   1 7857.34  380.68
   1  -7   1  197.44   14.05
   1  -7   1  180.74   12.20
   2  -7   1  191.14   13.09
   2  -7   1  215.44   15.37
  -2   7  -1  192.87   12.39
   3  -7   1 1564.81   89.44
   3  -7   1 1609.41   81.41
  -3   7  -1 1619.28   84.22
   4  -7   1  122.66   10.59
   4  -7   1  156.27   14.16
  -4   7  -1  132.21   10.48
   5  -7   1  113.84   10.14
  -5   7  -1   91.24    9.39
   5  -7   1   86.77   13.74
  -6   7  -1   -2.96    5.47
   6  -7   1    3.75    7.14
  -7   7  -1   44.72   10.09
   7  -7   1    8.45    9.39
   8  -7   1   29.51   12.36
  -8   7  -1   62.67   12.02
   9  -7   1   50.47   14.09
  -9   7  -1   73.90   13.72
 -10   7  -1   37.60   13.60
  10  -7   1   44.07   15.02
 -11   7  -1  189.21   21.87
  11  -7   1  273.93   27.56
 -12   7  -1   11.49   12.55
  12  -7   1   13.55   14.83
  13  -7   1   37.67   19.42
  14  -7   1   11.29   17.95
  15  -7   1  151.11   32.85
  16  -7   1   18.42   20.56
 -18  -6   1   10.35   18.23
 -17  -6   1   48.45   22.80
 -16  -6   1    3.51   19.59
 -13  -6   1  126.41   21.75
 -12  -6   1   14.43   13.49
 -11  -6   1 1130.37   66.85
 -10  -6   1  199.48   19.72
  10   6  -1  191.21   19.31
   9   6  -1  472.76   33.88
  -9  -6   1  534.22   34.16
   8   6  -1  104.12   14.96
  -8  -6   1  112.10   13.18
   7   6  -1 2511.09  138.57
  -7  -6   1 2575.51  131.50
  -6  -6   1    5.60    5.78
   6   6  -1    1.66    4.63
  -5  -6   1  704.27   39.52
   5   6  -1  673.69   39.36
  -4  -6   1  131.48   11.04
  -4  -6   1  130.25    9.34
  -3  -6   1  215.87   14.83
  -2  -6   1   24.71    5.56
  -1  -6   1 1127.53   57.97
   0  -6   1 1814.25   97.24
   0  -6   1 1807.51   90.51
   1  -6   1 1851.29   93.15
   1  -6   1 1879.27  101.08
   2  -6   1  126.05   10.19
  -2   6  -1  143.19    9.88
   2  -6   1  179.49   13.02
   3  -6   1  690.91   38.14
  -3   6  -1  681.45   39.35
   3  -6   1  777.25   43.46
   4  -6   1  191.26   13.02
   4  -6   1  166.29   15.52
  -4   6  -1  185.45   13.00
  -5   6  -1  461.04   28.86
   5  -6   1  479.04   32.45
  -6   6  -1    4.04    5.60
   6  -6   1   -1.93    6.00
   7  -6   1  939.37   58.95
  -7   6  -1  917.41   54.65
   8  -6   1  373.24   30.85
  -8   6  -1  385.72   27.99
   9  -6   1    2.38    9.89
  -9   6  -1   -5.78    7.43
 -10   6  -1   10.06   10.24
  10  -6   1   19.09   12.65
  11  -6   1  417.16   40.19
 -11   6  -1  612.36   39.79
 -12   6  -1   -0.58   11.31
  12  -6   1  -10.29   12.44
  13  -6   1  116.57   25.78
  14  -6   1    9.90   16.92
  15  -6   1   20.21   18.88
 -18  -5   1    0.08   19.64
 -17  -5   1   64.69   23.93
 -16  -5   1   16.53   19.38
 -15  -5   1  292.53   39.35
 -13  -5   1  365.77   30.41
 -12  -5   1   41.29   14.91
 -11  -5   1  329.91   27.41
  11   5  -1  349.78   29.51
  10   5  -1   69.01   14.87
 -10  -5   1   96.81   16.63
  -9  -5   1   40.26   11.38
   9   5  -1   20.51    9.42
   8   5  -1  213.22   19.24
  -8  -5   1  239.76   19.42
   7   5  -1  118.81   12.67
  -7  -5   1  131.51   13.53
   6   5  -1  161.39   13.30
  -6  -5   1  160.85   13.95
  -5  -5   1  561.96   32.53
   5   5  -1  541.28   32.63
   4   5  -1   46.43    5.45
  -4  -5   1   60.20    8.28
  -3  -5   1  570.91   31.79
  -2  -5   1  448.48   25.16
  -1  -5   1 1718.92   86.22
   0  -5   1  159.38    9.83
   0  -5   1  152.97   10.46
   1  -5   1  403.49   21.13
   1  -5   1  375.13   23.51
  -2   5  -1 2410.19  127.56
   2  -5   1 2425.61  121.96
   2  -5   1 2545.57  132.96
  -3   5  -1 3399.22  172.82
   3  -5   1 3224.40  179.19
   3  -5   1 3371.72  164.89
   4  -5   1  272.80   20.06
  -4   5  -1  251.07   17.29
  -5   5  -1   70.38    8.40
   5  -5   1   48.34   10.34
  -6   5  -1  311.35   22.00
   6  -5   1  306.96   24.40
   7  -5   1   21.97    9.71
  -7   5  -1    6.89    6.80
   8  -5   1  106.84   17.63
  -8   5  -1   73.93   13.59
   9  -5   1    3.74    9.48
  -9   5  -1    7.84    8.85
  10  -5   1   81.58   17.92
 -10   5  -1  105.79   17.49
  11  -5   1  218.81   24.78
 -11   5  -1  200.37   21.95
  12  -5   1  167.03   28.92
 -12   5  -1  210.43   22.73
  13  -5   1   22.47   16.72
 -13   5  -1   14.98   14.02
  14  -5   1   13.60   18.41
  15  -5   1  103.68   27.15
 -18  -4   1   22.62   22.92
 -17  -4   1   26.44   19.49
 -16  -4   1  161.29   30.75
 -15  -4   1   16.66   19.74
 -13  -4   1    2.84   10.35
  12   4  -1  274.92   26.95
 -12  -4   1  313.96   26.47
  11   4  -1  495.14   38.01
 -11  -4   1  534.07   36.55
 -10  -4   1  161.60   17.21
  10   4  -1  176.52   18.69
  -9  -4   1  148.70   18.16
   9   4  -1  126.09   17.55
   8   4  -1  116.79   16.07
  -8  -4   1  126.98   16.75
  -7  -4   1  101.23   11.86
   7   4  -1  101.75   11.77
   6   4  -1  369.89   24.43
  -6  -4   1  360.14   23.92
  -5  -4   1  790.04   43.42
   5   4  -1  770.90   44.98
  -4  -4   1  323.76   20.13
   4   4  -1  316.57   19.88
  -3  -4   1 1078.51   56.23
  -2  -4   1 2473.84  123.18
  -1  -4   1    1.73    2.00
   0  -4   1  384.48   20.43
   1  -4   1   52.25    5.38
  -2   4  -1   71.87    5.72
   2  -4   1   50.10    4.87
   2  -4   1   52.27    6.25
   3  -4   1 1092.23   57.86
   3  -4   1 1235.54   64.69
  -3   4  -1 1070.89   60.86
  -4   4  -1   33.26    6.48
   4  -4   1   29.92    7.24
   5  -4   1  389.76   27.89
  -5   4  -1  413.93   26.10
   6  -4   1    2.36    6.42
  -6   4  -1    0.54    5.18
   7  -4   1  175.88   18.75
  -7   4  -1  228.86   18.96
   8  -4   1   64.82   15.14
  -8   4  -1  111.52   16.90
  -9   4  -1   -3.17    7.21
   9  -4   1    0.61    8.59
 -10   4  -1   16.13   10.64
  10  -4   1   20.54   12.62
 -11   4  -1   53.32   15.59
  11  -4   1   58.02   16.57
 -12   4  -1   43.21   16.29
  12  -4   1   26.94   15.67
  13  -4   1  -13.26   13.69
 -13   4  -1  -22.34    9.93
  14  -4   1   96.85   24.05
 -14   4  -1   64.20   21.04
  15  -4   1   28.83   21.58
 -17  -3   1   19.38   19.61
 -16  -3   1   47.54   20.26
 -15  -3   1    4.38   16.38
 -12  -3   1  168.52   19.12
  12   3  -1  195.63   22.14
 -11  -3   1  130.89   19.54
  11   3  -1  130.71   20.77
  10   3  -1  698.15   46.95
 -10  -3   1  698.64   43.69
   9   3  -1  182.29   18.34
   8   3  -1 2291.27  128.00
   7   3  -1  156.92   15.12
   6   3  -1  479.48   30.85
   5   3  -1  296.38   20.10
   4   3  -1  810.90   45.92
   3   3  -1 1123.16   61.15
  -2  -3   1  129.29    8.98
  -1  -3   1 1596.61   79.66
   1  -3   1  529.83   30.19
  -2   3  -1    5.26    2.64
   2  -3   1   -0.87    2.99
  -3   3  -1  631.47   35.94
   3  -3   1  642.48   38.02
   4  -3   1 1220.83   66.93
  -4   3  -1 1107.80   63.70
   5  -3   1   75.06   11.02
  -5   3  -1   50.05    8.73
   6  -3   1  164.48   16.51
  -6   3  -1  200.12   16.32
  -7   3  -1  265.31   21.57
   7  -3   1  268.06   23.23
  -8   3  -1 1086.45   63.44
   8  -3   1 1019.27   65.45
   9  -3   1   77.05   15.67
  -9   3  -1   86.56   15.58
  10  -3   1  328.18   29.66
 -10   3  -1  353.64   28.79
  11  -3   1    9.50   11.53
 -11   3  -1   17.88   12.74
 -12   3  -1  102.47   19.98
  12  -3   1   26.61   16.18
  13  -3   1  -11.34   12.45
 -13   3  -1  -13.30   11.42
 -14   3  -1   65.12   20.50
  14  -3   1   29.52   19.42
 -17  -2   1    9.32   17.39
 -16  -2   1   91.99   25.48
 -15  -2   1   -4.46   15.56
 -14  -2   1  249.18   33.93
  13   2  -1   42.04   16.79
 -12  -2   1  192.57   25.06
  12   2  -1  190.09   21.86
  11   2  -1  216.86   22.97
 -11  -2   1  213.50   20.38
  10   2  -1  144.15   17.60
   9   2  -1  133.37   18.69
   8   2  -1  166.26   16.65
   7   2  -1  436.97   30.26
   6   2  -1  169.81   14.60
   5   2  -1   31.83    7.15
   4   2  -1  664.12   38.63
   3   2  -1  261.92   16.54
   1  -2   1  576.12   32.33
   2  -2   1 1309.76   72.32
  -2   2  -1 1334.27   70.01
  -3   2  -1 2868.15  153.44
   3  -2   1 3014.52  158.13
   4  -2   1  793.91   48.61
  -4   2  -1  863.92   47.28
   5  -2   1  189.37   15.72
  -5   2  -1  162.95   14.51
   6  -2   1   20.44    8.45
  -6   2  -1   18.93    7.79
  -7   2  -1  374.26   27.59
   7  -2   1  351.31   27.52
  -8   2  -1  717.54   49.31
   8  -2   1  864.33   52.26
  -9   2  -1  124.98   18.64
   9  -2   1  116.86   18.10
 -10   2  -1    2.94   10.03
  10  -2   1   14.33   11.51
  11  -2   1   66.59   17.34
 -11   2  -1  121.79   20.39
  12  -2   1  141.52   24.26
 -12   2  -1  195.96   26.60
 -13   2  -1   68.55   18.80
  13  -2   1   82.76   21.75
 -14   2  -1   28.87   18.82
  14  -2   1   60.89   21.82
 -15   2  -1  -18.02   15.38
 -16  -1   1    1.79   17.23
 -15  -1   1  282.02   31.82
 -14  -1   1  189.39   29.70
  13   1  -1   90.49   21.56
 -12  -1   1  -12.82    8.64
  12   1  -1   -4.66   11.73
  11   1  -1   27.27   12.90
  10   1  -1  111.35   19.09
   9   1  -1  105.95   16.85
   8   1  -1  504.51   35.31
   7   1  -1  718.14   45.34
   6   1  -1   72.97   11.05
   5   1  -1  987.66   56.93
   4   1  -1  935.20   53.16
   3   1  -1 4645.90  245.85
  -2   1  -1   62.17    5.94
   2  -1   1   73.35    6.44
   3  -1   1 1129.39   64.04
  -3   1  -1 1170.21   62.61
   4  -1   1 2068.62  109.91
  -4   1  -1 1933.78  106.88
   5  -1   1  310.98   23.28
  -5   1  -1  360.30   23.53
  -6   1  -1  480.88   32.05
   6  -1   1  480.20   32.48
   7  -1   1   34.95   10.40
  -7   1  -1   60.62   12.89
  -8   1  -1  242.19   21.89
   8  -1   1  213.31   20.97
  -9   1  -1   86.22   17.37
   9  -1   1  121.01   18.35
 -10   1  -1  106.79   18.66
  10  -1   1   90.50   17.81
  11  -1   1  174.22   21.04
 -11   1  -1  178.99   25.20
  12  -1   1   97.95   21.55
 -12   1  -1   68.96   18.94
 -13   1  -1   51.88   18.16
  13  -1   1   52.56   18.93
 -14   1  -1   -3.76   15.49
 -15   1  -1   61.53   22.27
 -16   0   1  -20.30   14.87
 -15   0   1  227.78   28.14
 -14   0   1    4.32   15.04
  13   0  -1   52.27   18.32
  12   0  -1  -17.21   10.76
  11   0  -1  233.51   23.92
  10   0  -1    3.53    9.40
   9   0  -1  215.74   21.03
   8   0  -1   -4.59    6.85
   7   0  -1  356.13   26.35
   6   0  -1   -4.48    4.43
   5   0  -1   17.45    6.07
   4   0  -1   -1.11    4.06
   3   0  -1  598.12   34.73
   2   0  -1   -3.01    1.58
  -2   0  -1    2.25    2.15
   2   0   1   -0.74    2.08
   3   0   1 1328.67   73.39
   5   0   1 2244.97  123.32
   6   0   1   -0.30    5.93
   7   0   1 1567.91   90.36
   8   0   1    2.91    7.40
  -8   0  -1   -4.88    6.78
   9   0   1  241.58   23.52
  -9   0  -1  321.79   26.33
  10   0   1   -7.33    8.20
 -10   0  -1   -5.13    7.89
 -10   0  -1   -1.85    6.31
  11   0   1  168.79   25.36
 -11   0  -1  228.44   24.05
 -12   0  -1    2.45   11.70
  12   0   1    4.20   12.90
 -13   0  -1   -8.46   12.13
  13   0   1   -4.12   11.69
 -14   0  -1  -11.65   13.69
 -15   0  -1  -13.15   15.76
 -16   0  -1   -4.84   16.68
 -15   1   1  301.17   33.01
  14  -1  -1  154.34   28.24
 -14   1   1  235.42   31.09
  13  -1  -1  110.18   23.83
 -13   1   1  100.34   21.51
  12  -1  -1    7.44   13.00
  11  -1  -1    6.07   11.23
  10  -1  -1   92.42   17.37
   9  -1  -1   90.60   16.84
   8  -1  -1  456.60   33.15
   7  -1  -1  650.64   42.12
   6  -1  -1   58.26   10.38
   5  -1  -1  976.36   56.90
   4  -1  -1  953.53   54.57
   3  -1  -1 4748.47  251.73
   2  -1  -1   55.91    5.32
   2   1   1   72.94    6.06
  -3  -1  -1 1079.63   56.90
   3   1   1 1166.99   62.20
   4   1   1 2130.07  115.76
   5   1   1  326.27   22.53
   6   1   1  454.58   30.43
   7   1   1   55.39   11.86
   8   1   1  164.78   17.25
   9   1   1  118.26   18.05
  -9  -1  -1  106.55   12.39
  10   1   1  101.52   18.96
 -10  -1  -1  148.08   17.44
 -10  -1  -1  113.20   20.28
  11   1   1  203.03   26.69
 -11  -1  -1  198.06   26.58
 -12  -1  -1   68.65   20.22
  12   1   1  108.26   21.11
 -13  -1  -1   44.29   17.71
 -14  -1  -1    2.26   16.94
 -15  -1  -1   43.10   21.64
 -16  -1  -1   29.66   19.34
 -15   2   1   34.66   18.10
  14  -2  -1  210.99   26.70
 -14   2   1  223.96   31.46
  13  -2  -1   32.26   15.92
 -13   2   1   43.45   16.51
  12  -2  -1  190.16   23.14
 -12   2   1  184.42   22.34
  11  -2  -1  231.30   24.58
  10  -2  -1  165.36   19.45
   9  -2  -1  141.48   20.55
   8  -2  -1  201.42   19.67
   7  -2  -1  433.64   30.97
   6  -2  -1  157.13   14.84
   5  -2  -1   33.37    7.87
   4  -2  -1  661.19   39.57
   3  -2  -1  261.32   17.66
   2  -2  -1   39.42    5.24
   2  -2  -1   37.24    5.32
  -2  -2  -1 1321.34   66.18
  -3  -2  -1 3056.94  154.29
   3   2   1 3189.72  166.33
  -4  -2  -1  734.33   40.22
   4   2   1  781.24   43.94
   5   2   1  185.34   14.58
  -5  -2  -1  170.14   12.54
   6   2   1    7.77    5.80
  -6  -2  -1   10.61    5.78
   7   2   1  361.75   26.61
  -7  -2  -1  356.64   23.52
  -8  -2  -1  857.97   48.61
   8   2   1  850.44   53.44
   9   2   1  141.40   18.97
  -9  -2  -1  126.06   13.09
 -10  -2  -1   12.30   11.92
 -10  -2  -1    5.61    8.05
  10   2   1   -7.41    8.54
 -11  -2  -1  129.28   23.85
 -11  -2  -1  108.05   17.28
  11   2   1   88.58   18.98
  12   2   1  183.15   26.82
 -12  -2  -1  224.33   29.42
 -13  -2  -1   56.08   19.46
 -14  -2  -1   44.75   20.50
 -15  -2  -1  -20.31   15.21
 -16  -2  -1    2.03   17.62
 -17  -2  -1  -10.93   16.87
  15  -3  -1  -10.66   17.40
 -14   3   1  194.57   28.65
  14  -3  -1  112.80   25.09
  13  -3  -1   14.16   14.54
 -13   3   1   14.77   14.17
 -12   3   1  219.51   23.55
  12  -3  -1  184.41   27.76
  11  -3  -1  150.08   23.88
  10  -3  -1  684.97   48.63
   9  -3  -1  194.99   20.20
   8  -3  -1 2156.85  122.88
   7  -3  -1  152.34   16.05
   6  -3  -1  470.63   31.97
   5  -3  -1  286.39   21.10
   4  -3  -1  800.95   47.22
   3  -3  -1 1127.90   63.22
   2  -3  -1  125.88    9.92
   2  -3  -1  138.18    9.27
   1  -3  -1 1570.77   82.70
   1  -3  -1 1502.41   76.74
  -2  -3  -1    7.97    3.01
   3   3   1  677.95   36.38
  -3  -3  -1  603.91   34.02
  -4  -3  -1 1157.50   60.23
   4   3   1 1170.17   64.65
  -5  -3  -1   62.98    8.61
   5   3   1   68.12    9.16
  -6  -3  -1  185.84   14.09
   6   3   1  172.99   15.11
   7   3   1  288.23   22.67
  -7  -3  -1  306.72   20.61
  -8  -3  -1 1016.47   56.37
   8   3   1 1004.32   61.31
   9   3   1   67.55   14.23
  -9  -3  -1  103.79   14.28
  10   3   1  333.92   28.10
 -10  -3  -1  354.67   25.50
 -11  -3  -1   16.55    9.74
 -11  -3  -1    0.94   11.93
  11   3   1    0.56   10.58
 -12  -3  -1   92.69   20.79
 -13  -3  -1  -16.12   11.85
 -14  -3  -1   73.56   23.35
 -15  -3  -1   -2.66   18.52
 -16  -3  -1   19.51   18.88
 -17  -3  -1   47.46   24.16
  15  -4  -1   58.31   22.86
  14  -4  -1  212.21   33.19
  13  -4  -1   22.34   16.80
 -13   4   1   16.64   14.59
 -12   4   1  214.49   24.60
  12  -4  -1  318.43   30.35
  11  -4  -1  492.30   39.78
 -11   4   1  467.85   36.18
  10  -4  -1  156.30   19.44
   9  -4  -1  118.46   18.74
   8  -4  -1  129.92   19.15
   7  -4  -1  124.02   14.75
   6  -4  -1  367.53   26.81
   5  -4  -1  777.34   47.39
   4  -4  -1  330.77   22.88
   3  -4  -1 1071.87   60.01
   3  -4  -1 1048.36   55.41
   2  -4  -1 2454.14  135.41
   2  -4  -1 2600.16  125.83
   1  -4  -1    1.00    2.27
   1  -4  -1    6.15    2.45
   0  -4  -1  354.55   19.26
  -1  -4  -1   51.02    4.46
  -2  -4  -1   50.19    5.11
  -3  -4  -1 1151.60   60.12
   3   4   1 1189.36   63.63
  -4  -4  -1   12.09    4.73
   4   4   1   27.36    5.30
  -5  -4  -1  396.34   24.04
   5   4   1  403.27   25.50
  -6  -4  -1   -4.94    4.35
   6   4   1    6.09    5.61
   7   4   1  230.35   18.80
  -7  -4  -1  197.32   16.27
  -8  -4  -1   78.38   12.48
   8   4   1   62.69   12.67
  -9  -4  -1   12.30    8.26
   9   4   1    6.33    7.87
  10   4   1   24.11   10.90
 -10  -4  -1   45.19   11.82
 -11  -4  -1   72.95   15.31
  11   4   1   32.43   14.24
 -12  -4  -1   55.09   17.60
 -13  -4  -1   -4.84   11.45
 -14  -4  -1   96.83   25.68
 -15  -4  -1   15.98   18.46
 -16  -4  -1  153.47   30.55
 -17  -4  -1   29.44   21.77
  16  -5  -1   40.83   22.23
  15  -5  -1  257.28   31.11
  14  -5  -1    9.61   15.48
 -13   5   1  310.04   29.76
  13  -5  -1  338.38   33.47
  12  -5  -1   43.10   17.14
 -12   5   1   51.07   16.89
  11  -5  -1  377.32   31.69
 -11   5   1  218.67   25.10
 -10   5   1  141.43   19.10
  10  -5  -1   83.86   17.94
   9  -5  -1   26.76   11.98
   8  -5  -1  225.19   22.01
   7  -5  -1  158.64   16.86
   6  -5  -1  162.20   15.84
   5  -5  -1  544.34   35.33
   4  -5  -1   43.79    8.58
   4  -5  -1   41.55    7.52
   3  -5  -1  583.96   31.93
   3  -5  -1  557.24   34.57
   2  -5  -1  392.26   23.22
   2  -5  -1  427.24   25.41
   1  -5  -1 1866.02   89.45
   1  -5  -1 1692.12   95.69
   0  -5  -1  165.68   10.53
  -1  -5  -1  390.77   21.48
  -2  -5  -1 2623.19  130.33
  -3  -5  -1 3390.25  168.16
  -4  -5  -1  252.57   16.61
   4   5   1  256.10   16.49
   5   5   1   55.76    7.13
  -5  -5  -1   65.07    9.28
   6   5   1  331.07   22.54
  -6  -5  -1  323.06   21.47
   7   5   1    2.70    6.34
  -7  -5  -1   -1.95    6.12
   8   5   1   85.72   14.16
  -8  -5  -1   98.49   14.48
   9   5   1   -1.53    7.79
  -9  -5  -1    6.58    7.74
  10   5   1   68.66   14.76
 -10  -5  -1   65.08   12.97
 -11  -5  -1  210.11   19.53
 -12  -5  -1  214.42   30.06
 -13  -5  -1   33.06   15.47
 -14  -5  -1   16.50   17.99
 -15  -5  -1  207.90   35.49
 -16  -5  -1   90.20   27.54
 -17  -5  -1   39.60   20.92
  16  -6  -1   14.94   20.96
  15  -6  -1   59.91   22.63
  14  -6  -1   11.43   15.54
  13  -6  -1  113.54   24.66
  12  -6  -1   37.93   16.43
 -12   6   1   16.81   12.96
  11  -6  -1 1154.60   80.30
 -11   6   1 1364.83   76.58
 -10   6   1  232.94   21.03
  10  -6  -1  212.46   23.35
  -9   6   1  457.75   32.37
   9  -6  -1  468.83   35.94
   8  -6  -1  150.75   20.96
   7  -6  -1 2406.13  135.59
   6  -6  -1    9.74    7.56
   5  -6  -1  690.15   43.49
   4  -6  -1  150.04   11.97
   4  -6  -1  142.74   13.33
   3  -6  -1  160.76   13.46
   3  -6  -1  245.32   16.47
   2  -6  -1   58.51    6.62
   2  -6  -1   49.45    7.50
   1  -6  -1 1109.94   57.11
   1  -6  -1  941.16   53.01
   0  -6  -1 1770.92   88.84
  -1  -6  -1 1973.45   98.74
  -2  -6  -1  161.58   11.34
  -3  -6  -1  824.32   44.04
   4   6   1  188.38   12.91
  -4  -6  -1  199.63   13.87
   5   6   1  504.66   30.51
  -5  -6  -1  515.53   30.16
   6   6   1    7.58    5.47
  -6  -6  -1    0.42    5.17
   7   6   1  938.15   56.18
  -7  -6  -1  978.08   53.58
  -8  -6  -1  403.29   27.02
   8   6   1  387.45   27.76
  -9  -6  -1   -4.76    7.36
   9   6   1   -4.19    6.77
 -10  -6  -1   26.97   10.92
  10   6   1   23.34   11.03
 -11  -6  -1  488.56   34.03
 -12  -6  -1    0.65   12.57
 -13  -6  -1  131.41   25.60
 -14  -6  -1   -8.26   14.58
 -15  -6  -1    8.39   17.87
 -16  -6  -1   49.48   23.98
 -17  -6  -1   47.29   23.84
  16  -7  -1   58.78   24.56
  15  -7  -1  141.52   29.37
  14  -7  -1   23.68   16.89
  13  -7  -1  193.11   30.71
  12  -7  -1  370.13   35.18
 -11   7   1  653.20   46.71
  11  -7  -1  767.20   53.43
 -10   7   1  419.75   32.09
  10  -7  -1  474.24   37.01
  -9   7   1   79.75   12.80
   9  -7  -1   34.47   12.90
  -8   7   1 1741.66   96.76
   8  -7  -1 1770.37  103.25
   7  -7  -1   75.73   14.71
  -7   7   1  124.61   12.17
   6  -7  -1  121.26   13.25
  -6   7   1   88.87   10.06
   5  -7  -1   96.05   13.60
  -5   7   1   99.76    8.89
   5  -7  -1  104.95   10.62
   4  -7  -1   19.57    6.83
   4  -7  -1    6.59    5.00
   3  -7  -1 2836.98  138.94
   3  -7  -1 2685.35  149.69
   2  -7  -1  745.61   40.57
   2  -7  -1  750.89   43.66
   1  -7  -1 5827.24  288.29
   1  -7  -1 5898.02  309.73
   0  -7  -1 7463.59  370.87
   0  -7  -1 7691.22  398.84
  -1  -7  -1  190.27   12.66
  -2  -7  -1  202.46   13.62
  -3  -7  -1 1711.06   87.40
   4   7   1  156.04   10.69
  -4  -7  -1  162.77   12.57
   5   7   1   72.20    7.52
  -5  -7  -1   79.19   10.62
   6   7   1   -6.72    4.35
  -6  -7  -1   -0.17    5.63
   7   7   1   11.60    6.92
  -7  -7  -1   11.16    8.25
   8   7   1   46.11   10.50
  -8  -7  -1   55.24   11.95
   9   7   1   73.27   13.13
  -9  -7  -1   64.33   12.62
 -10  -7  -1   68.09   14.33
 -11  -7  -1  266.86   23.01
 -13  -7  -1   42.33   19.00
 -14  -7  -1    2.96   16.21
 -15  -7  -1  164.44   32.27
 -16  -7  -1    5.35   17.93
 -17  -7  -1   85.42   27.73
  17  -8  -1   50.89   24.82
  16  -8  -1  253.79   40.60
  15  -8  -1   12.18   19.22
  14  -8  -1  250.72   36.92
  13  -8  -1  103.32   25.23
  12  -8  -1  477.89   41.86
 -11   8   1  110.05   19.65
  11  -8  -1  205.20   23.92
  10  -8  -1   64.18   16.40
 -10   8   1   26.98   10.83
  -9   8   1   37.43   10.10
   9  -8  -1   25.19   12.31
  -8   8   1  490.84   29.82
   8  -8  -1  376.67   32.70
  -7   8   1   87.51   11.14
   7  -8  -1  120.82   17.72
   6  -8  -1   44.46   11.37
  -6   8   1   59.68    8.52
   5  -8  -1  794.73   44.00
  -5   8   1  756.68   42.30
   5  -8  -1  743.48   47.87
   4  -8  -1   80.42    9.81
  -4   8   1   61.18    5.76
   4  -8  -1   68.82   10.00
   3  -8  -1  209.27   16.54
   2  -8  -1  422.46   24.81
   2  -8  -1  405.73   26.36
   0  -8  -1  210.84   13.95
  -1  -8  -1   81.23    7.28
  -2  -8  -1 1408.47   72.46
  -3  -8  -1   59.83    7.09
  -4  -8  -1  185.07   13.93
   5   8   1  844.59   47.99
  -5  -8  -1  877.42   47.87
  -6  -8  -1  155.83   14.19
   6   8   1  152.60   12.52
   7   8   1  261.45   19.07
  -7  -8  -1  264.74   20.19
   8   8   1    2.70    6.82
  -8  -8  -1    1.80    6.73
  -9  -8  -1  287.06   22.56
   9   8   1  292.74   22.92
 -10  -8  -1   29.00   11.64
 -11  -8  -1   25.42   12.35
 -13  -8  -1   -0.58   14.46
 -14  -8  -1   25.73   18.04
 -15  -8  -1   15.63   18.30
 -16  -8  -1   59.86   26.20
 -17  -8  -1   28.20   21.33
  17  -9  -1   12.79   23.05
  16  -9  -1   20.47   20.21
  15  -9  -1   84.07   24.63
  14  -9  -1   15.64   18.51
  13  -9  -1   61.00   21.22
  12  -9  -1  597.16   48.12
  11  -9  -1  211.02   30.14
  10  -9  -1  313.63   30.14
 -10   9   1  360.52   26.25
  -9   9   1   -2.02    6.46
   9  -9  -1   -8.25    8.73
   8  -9  -1  762.84   49.69
  -8   9   1  669.05   42.78
  -7   9   1  323.55   21.61
   7  -9  -1  304.97   26.45
   6  -9  -1  757.13   50.42
  -6   9   1  786.92   44.25
   6  -9  -1  815.27   46.22
  -5   9   1  103.38    8.77
   5  -9  -1  133.48   14.02
   5  -9  -1   93.38   11.04
   4  -9  -1  312.13   22.49
   4  -9  -1  270.19   19.86
   3  -9  -1  283.55   20.37
   3  -9  -1  255.87   18.26
   2  -9  -1  187.70   14.10
   2  -9  -1  147.48   12.68
   1  -9  -1   75.64    7.72
   1  -9  -1   40.33    7.03
   0  -9  -1  556.38   34.06
   0  -9  -1  631.79   33.28
  -1  -9  -1 1415.22   72.91
  -2  -9  -1 2039.82  103.49
  -3  -9  -1  401.97   24.43
  -4  -9  -1  179.06   13.95
   5   9   1  286.67   18.32
  -5  -9  -1  316.73   20.98
   6   9   1 2105.02  112.87
  -6  -9  -1 2073.39  108.41
   7   9   1    8.41    6.81
  -7  -9  -1   -7.37    5.87
   8   9   1  173.96   15.46
  -8  -9  -1  177.69   16.42
  -9  -9  -1    3.36    8.96
 -10  -9  -1  143.56   16.22
 -11  -9  -1   16.35   12.59
 -13  -9  -1    8.42   16.19
 -14  -9  -1   16.47   18.48
 -15  -9  -1  -13.36   17.45
 -16  -9  -1    4.96   20.25
 -17  -9  -1   12.00   21.43
  17 -10  -1    9.53   22.46
  16 -10  -1   92.18   27.19
  15 -10  -1   15.37   18.12
  14 -10  -1   11.24   18.44
  13 -10  -1   37.33   18.45
  12 -10  -1   88.01   21.95
  11 -10  -1  703.38   52.89
  10 -10  -1   45.02   15.09
  -9  10   1  120.98   13.30
   9 -10  -1  136.58   21.92
  -8  10   1    3.60    6.53
   8 -10  -1   13.36    8.82
   7 -10  -1 1075.47   67.18
  -7  10   1 1065.42   59.54
   6 -10  -1   24.45    9.21
   6 -10  -1   33.54   11.17
  -6  10   1   34.97    6.58
  -5  10   1   25.56    4.77
   5 -10  -1   26.23    9.36
   5 -10  -1   14.61    7.23
   4 -10  -1  245.01   17.27
   4 -10  -1  181.67   17.50
   3 -10  -1   15.15    5.93
   3 -10  -1   29.89    7.57
   2 -10  -1  827.21   51.63
   2 -10  -1  953.03   49.17
   1 -10  -1  411.29   26.47
   1 -10  -1  485.74   28.06
   0 -10  -1  965.21   54.53
   0 -10  -1  991.92   52.13
  -1 -10  -1 2266.19  123.02
  -1 -10  -1 2349.91  116.66
  -2 -10  -1    5.31    4.58
  -3 -10  -1  235.14   16.61
  -4 -10  -1  188.25   14.85
  -5 -10  -1  108.15   11.45
   6  10   1  218.79   15.11
  -6 -10  -1  228.00   18.10
  -7 -10  -1  137.59   13.79
   7  10   1  114.88   11.05
   8  10   1    3.36    6.29
  -8 -10  -1    7.98    8.35
  -9 -10  -1   10.82    9.75
 -10 -10  -1  141.24   20.57
 -11 -10  -1  194.39   20.32
 -14 -10  -1   66.98   23.24
 -15 -10  -1   -2.59   16.00
 -16 -10  -1   90.77   27.11
 -17 -10  -1   18.56   23.93
  17 -11  -1   20.85   22.03
  16 -11  -1   75.43   24.45
  15 -11  -1  225.45   38.31
  14 -11  -1   -0.43   15.14
  13 -11  -1  123.74   27.16
  12 -11  -1   16.62   15.80
  11 -11  -1  336.94   33.06
  10 -11  -1   -9.87    9.06
   9 -11  -1    5.79   11.10
  -9  11   1    0.22    6.93
   8 -11  -1   29.84   11.76
  -8  11   1   25.53    7.56
   7 -11  -1   61.55   15.13
   7 -11  -1  122.68   13.48
  -6  11   1   28.42    5.91
   6 -11  -1   35.13    9.54
   6 -11  -1   20.34   10.07
  -5  11   1   31.76    4.90
   5 -11  -1   24.26    8.57
   5 -11  -1   27.36    9.41
   4 -11  -1 1337.09   80.59
   4 -11  -1 1450.62   75.14
   3 -11  -1 1670.16   95.71
   3 -11  -1 1732.80   89.32
   2 -11  -1 1434.64   79.00
   2 -11  -1 1358.92   73.74
   1 -11  -1 3083.68  163.21
   1 -11  -1 2981.15  152.65
   0 -11  -1  965.78   54.19
   0 -11  -1  964.05   51.83
  -1 -11  -1   12.70    4.19
  -2 -11  -1   41.87    7.89
  -3 -11  -1 1318.27   69.73
  -4 -11  -1 1153.63   62.40
  -5 -11  -1  109.25   13.76
   6  11   1  249.79   16.43
  -6 -11  -1  282.27   20.86
   7  11   1  220.07   15.37
  -7 -11  -1  217.40   18.38
  -8 -11  -1  522.35   34.19
  -9 -11  -1   -2.39    8.55
 -10 -11  -1   47.54   15.43
 -11 -11  -1   79.95   18.40
 -12 -11  -1   83.52   18.12
 -14 -11  -1   -7.29   15.19
 -15 -11  -1   73.98   24.61
 -16 -11  -1  -16.58   16.49
 -17 -11  -1   31.49   23.26
  17 -12  -1  -19.94   20.63
  16 -12  -1   45.41   25.24
  15 -12  -1   73.40   26.46
  14 -12  -1  -11.76   17.76
  13 -12  -1  128.51   28.99
  12 -12  -1  180.53   29.52
  11 -12  -1   19.48   15.45
  10 -12  -1   -5.20   10.82
   9 -12  -1  483.60   38.77
   8 -12  -1   79.83   16.61
  -8  12   1   78.81    9.38
  -7  12   1  386.90   23.19
   7 -12  -1  354.78   30.05
   7 -12  -1  357.52   26.78
   6 -12  -1   -3.56    6.23
  -6  12   1   -0.15    3.59
   6 -12  -1   -0.27    8.25
   5 -12  -1  839.23   51.77
  -5  12   1  764.79   42.97
   5 -12  -1  807.88   47.25
   4 -12  -1  250.35   20.09
   4 -12  -1  189.13   17.20
   3 -12  -1 1216.96   66.32
   3 -12  -1 1224.98   71.09
   2 -12  -1    0.84    5.42
   1 -12  -1 1009.29   55.49
   1 -12  -1 1031.01   58.37
   0 -12  -1  223.11   16.16
   0 -12  -1  246.07   16.63
  -1 -12  -1 1160.01   62.04
  -1 -12  -1 1173.06   64.01
  -2 -12  -1   90.70    9.61
  -3 -12  -1 1231.48   65.87
  -4 -12  -1  168.22   14.51
  -5 -12  -1 1695.77   89.72
  -6 -12  -1  706.58   42.30
  -7 -12  -1  435.14   29.70
  -8 -12  -1    5.84    8.41
  -9 -12  -1  747.45   46.38
 -10 -12  -1  -19.01    9.95
 -11 -12  -1  214.96   21.73
 -12 -12  -1    0.92   12.04
 -14 -12  -1  -17.10   15.85
 -15 -12  -1   13.31   17.63
 -16 -12  -1    3.68   18.55
 -17 -12  -1  -11.91   17.35
  17 -13  -1   13.04   25.09
  16 -13  -1    0.99   19.21
  15 -13  -1    4.71   19.32
  14 -13  -1   42.22   21.79
  13 -13  -1  144.87   30.91
  12 -13  -1   33.54   17.36
  11 -13  -1   22.80   16.57
  10 -13  -1  107.02   22.22
   9 -13  -1   23.05   13.90
   8 -13  -1  227.19   22.67
   8 -13  -1  217.35   20.33
  -7  13   1  338.98   21.38
   7 -13  -1  336.51   26.23
   7 -13  -1  353.73   29.47
  -6  13   1  332.94   19.25
   6 -13  -1  305.23   26.69
   6 -13  -1  314.12   24.07
   5 -13  -1  104.56   15.19
   5 -13  -1   56.72   12.87
   4 -13  -1  108.08   13.26
   4 -13  -1   67.25   12.50
   3 -13  -1    0.67    6.36
   2 -13  -1  726.47   43.89
   2 -13  -1  701.29   41.54
   1 -13  -1  359.82   23.72
   1 -13  -1  334.49   22.65
   0 -13  -1  429.87   27.05
   0 -13  -1  438.27   26.95
  -1 -13  -1 3132.59  160.01
  -1 -13  -1 3228.04  169.44
  -2 -13  -1  621.56   36.27
  -3 -13  -1   32.24    8.59
  -4 -13  -1  310.78   21.93
  -5 -13  -1 1374.83   74.49
  -6 -13  -1  235.30   19.39
  -7 -13  -1   67.91   13.17
  -8 -13  -1  146.02   15.70
  -9 -13  -1   53.11   14.15
 -10 -13  -1  156.07   22.81
 -11 -13  -1   -4.84   10.35
 -12 -13  -1   -4.37   11.09
 -14 -13  -1    5.61   16.60
 -15 -13  -1   14.61   18.86
 -16 -13  -1    0.10   19.54
 -17 -13  -1   77.77   28.09
  17 -14  -1  -22.28   21.04
  16 -14  -1   56.83   24.95
  15 -14  -1    2.44   19.01
  14 -14  -1  100.35   28.03
  13 -14  -1    7.03   16.07
  12 -14  -1   34.24   17.71
  11 -14  -1   25.19   16.74
  10 -14  -1   57.18   18.05
   9 -14  -1  188.90   26.96
   8 -14  -1   95.20   18.89
   8 -14  -1   91.11   16.69
   7 -14  -1    8.97    9.48
   7 -14  -1   -1.46    7.84
   6 -14  -1   12.80    8.35
   6 -14  -1   -0.21    8.15
   5 -14  -1  276.88   21.98
   4 -14  -1  264.84   21.79
   4 -14  -1  236.49   20.03
   3 -14  -1  196.08   17.90
   3 -14  -1  207.94   17.69
   2 -14  -1  942.15   56.89
   2 -14  -1  970.24   54.04
   1 -14  -1   43.87    9.45
   1 -14  -1   58.52    9.72
   0 -14  -1 1005.04   55.33
   0 -14  -1 1013.03   57.47
  -1 -14  -1 2574.77  136.75
  -1 -14  -1 2522.13  129.85
  -2 -14  -1    8.82    6.56
  -3 -14  -1   28.05    7.56
  -4 -14  -1  714.40   42.07
  -5 -14  -1   96.84   14.29
  -6 -14  -1   33.73   10.53
  -7 -14  -1  -10.98    5.99
  -8 -14  -1    9.85    9.42
  -9 -14  -1  221.55   20.87
 -10 -14  -1   74.03   16.75
 -11 -14  -1   -2.40   10.95
 -12 -14  -1  183.54   25.30
 -14 -14  -1   55.84   22.35
 -15 -14  -1   16.69   19.64
 -16 -14  -1   19.21   19.41
 -17 -14  -1    0.46   20.70
  17 -15  -1   -8.19   21.60
  16 -15  -1   24.10   23.02
  15 -15  -1   42.12   22.55
  14 -15  -1   19.64   21.58
  13 -15  -1  -19.77   14.22
  12 -15  -1   11.40   15.43
  11 -15  -1   -8.46   12.73
  10 -15  -1  233.72   26.72
   9 -15  -1   40.41   16.01
   8 -15  -1   35.57   14.10
   8 -15  -1   34.55   12.19
   7 -15  -1   13.61    9.87
   7 -15  -1   18.90   11.15
   6 -15  -1  614.69   40.45
   6 -15  -1  628.85   44.17
   5 -15  -1   -0.77    8.20
   5 -15  -1    1.75    7.82
   4 -15  -1  514.94   35.76
   4 -15  -1  500.31   33.40
   3 -15  -1  201.32   18.02
   3 -15  -1  215.82   18.91
   2 -15  -1 1529.99   84.90
   2 -15  -1 1432.15   79.73
   1 -15  -1 1264.86   67.50
   1 -15  -1 1071.50   63.63
   0 -15  -1  548.87   32.73
   0 -15  -1  521.90   33.00
  -2 -15  -1  362.32   25.16
  -2 -15  -1  403.14   22.83
  -3 -15  -1   53.89   10.72
  -4 -15  -1  822.47   47.41
  -5 -15  -1   12.79    8.32
  -6 -15  -1  614.64   38.66
  -7 -15  -1   16.13    9.61
  -8 -15  -1  467.52   32.73
  -9 -15  -1   40.43   13.52
 -10 -15  -1  124.68   20.51
 -11 -15  -1   13.20   12.41
 -12 -15  -1   29.41   14.71
 -15 -15  -1    2.43   16.51
 -16 -15  -1   16.64   17.34
 -17 -15  -1   27.26   22.55
  17 -16  -1  -20.13   22.89
  16 -16  -1   -3.95   20.05
  15 -16  -1   86.06   27.03
  14 -16  -1  139.92   31.86
  13 -16  -1   10.17   16.66
  12 -16  -1    7.20   15.22
  11 -16  -1  -12.48   13.40
  10 -16  -1   88.21   21.44
   9 -16  -1   61.98   16.41
   9 -16  -1   73.54   19.07
   8 -16  -1   -0.43   10.52
   8 -16  -1   -7.17    8.29
   7 -16  -1   -0.34    8.67
   7 -16  -1    8.82   11.48
   6 -16  -1  331.53   25.70
   6 -16  -1  262.27   25.99
   5 -16  -1  119.53   17.68
   5 -16  -1   63.03   14.68
   4 -16  -1   -3.72    6.78
   4 -16  -1    3.20    7.46
   3 -16  -1  387.82   27.72
   3 -16  -1  400.74   29.37
   2 -16  -1 1068.94   57.91
   2 -16  -1  946.02   59.91
   1 -16  -1   58.82   12.02
   0 -16  -1  220.94   16.82
   0 -16  -1  205.50   17.46
  -1 -16  -1   21.05    8.57
  -1 -16  -1   28.73    7.29
  -2 -16  -1 2135.76  111.18
  -2 -16  -1 2146.53  114.76
  -3 -16  -1  200.10   16.45
  -4 -16  -1  604.00   37.37
  -5 -16  -1  888.98   51.61
  -6 -16  -1  281.12   22.31
  -7 -16  -1  168.08   16.70
  -8 -16  -1  218.38   20.47
  -9 -16  -1  163.02   18.70
 -10 -16  -1   10.28   12.02
 -11 -16  -1    1.67   12.69
 -12 -16  -1   66.68   18.55
 -15 -16  -1   -3.15   16.25
 -16 -16  -1   88.12   27.68
  17 -17  -1    7.48   23.77
  16 -17  -1  -41.55   16.82
  15 -17  -1   19.55   22.09
  14 -17  -1   29.70   21.56
  13 -17  -1   99.19   29.03
  12 -17  -1   -0.85   16.20
  11 -17  -1  -13.13   13.44
  10 -17  -1  142.28   26.28
   9 -17  -1   98.78   19.14
   9 -17  -1   76.23   18.74
   8 -17  -1   58.86   16.68
   8 -17  -1   40.84   13.78
   7 -17  -1   -3.55    8.81
   7 -17  -1   -2.36   10.56
   6 -17  -1  305.34   28.31
   6 -17  -1  363.14   27.81
   5 -17  -1  706.46   43.14
   5 -17  -1  608.47   44.77
   4 -17  -1   46.26   12.01
   4 -17  -1   42.13   11.80
   3 -17  -1  216.66   18.99
   3 -17  -1  192.39   18.72
   2 -17  -1   32.69    9.03
   1 -17  -1 1093.53   63.19
   1 -17  -1 1172.65   66.09
   0 -17  -1  485.04   31.18
   0 -17  -1  484.59   30.90
  -1 -17  -1 1431.85   77.27
  -1 -17  -1 1439.77   79.62
  -2 -17  -1   69.91   12.10
  -4 -17  -1  660.52   40.50
  -5 -17  -1 1149.96   64.86
  -6 -17  -1   88.68   14.75
  -7 -17  -1   -8.65    7.48
  -8 -17  -1   43.61   14.22
  -9 -17  -1   21.64   12.32
 -10 -17  -1  107.92   20.31
 -11 -17  -1   -5.90   11.19
 -12 -17  -1  320.36   28.63
 -15 -17  -1   36.42   21.23
 -16 -17  -1   40.23   22.25
  16 -18  -1    6.35   23.98
  15 -18  -1  -17.85   18.92
  14 -18  -1   62.66   25.47
  13 -18  -1    6.52   16.57
  12 -18  -1   13.14   17.52
  11 -18  -1   40.69   18.79
  10 -18  -1   39.11   18.20
   9 -18  -1  877.90   62.13
   9 -18  -1  880.81   56.67
   8 -18  -1    2.00   10.58
   8 -18  -1    4.85   10.36
   7 -18  -1  309.73   29.08
   7 -18  -1  331.27   27.80
   6 -18  -1   92.85   18.50
   6 -18  -1   55.94   15.74
   5 -18  -1  147.69   17.52
   5 -18  -1  196.20   20.03
   4 -18  -1   -3.26    8.09
   4 -18  -1   -0.45    7.86
   3 -18  -1  506.88   35.43
   3 -18  -1  486.54   33.20
   2 -18  -1    0.31    8.09
   2 -18  -1   -0.74    7.65
   1 -18  -1  729.42   42.96
   1 -18  -1  665.40   43.26
   0 -18  -1  425.49   29.03
   0 -18  -1  445.01   29.10
  -2 -18  -1    3.91    7.57
  -2 -18  -1    3.67    4.90
  -3 -18  -1  125.62   14.05
  -4 -18  -1   38.56   11.33
  -5 -18  -1  223.24   19.74
  -6 -18  -1   -2.13    7.74
  -7 -18  -1   -7.74    8.26
  -8 -18  -1   -1.52   10.26
  -9 -18  -1  960.32   58.60
 -10 -18  -1   36.25   14.67
 -11 -18  -1  188.01   25.29
 -12 -18  -1   15.37   15.31
 -15 -18  -1   56.74   22.02
 -16 -18  -1   33.84   20.82
  16 -19  -1  -13.47   21.97
  15 -19  -1   14.29   21.53
  14 -19  -1  -13.99   17.31
  13 -19  -1   22.41   20.31
  12 -19  -1    4.79   17.00
  11 -19  -1  159.65   29.31
  10 -19  -1  372.56   36.36
   9 -19  -1   38.56   15.66
   9 -19  -1   16.63   14.72
   8 -19  -1   85.00   19.53
   8 -19  -1   41.15   14.98
   7 -19  -1    4.49   10.91
   7 -19  -1   -6.75    9.89
   6 -19  -1   56.19   15.77
   6 -19  -1   36.36   13.62
   5 -19  -1  249.53   24.62
   5 -19  -1  298.37   24.88
   4 -19  -1  151.36   17.21
   4 -19  -1  148.79   16.94
   3 -19  -1  271.44   22.02
   3 -19  -1  206.81   20.77
   2 -19  -1   19.82   10.31
   2 -19  -1    3.27    7.59
   1 -19  -1  131.79   14.27
   1 -19  -1  160.56   15.14
   0 -19  -1  108.81   14.72
   0 -19  -1  121.67   12.34
  -1 -19  -1  293.55   20.35
  -1 -19  -1  278.75   21.81
  -2 -19  -1   27.55    9.96
  -2 -19  -1   44.42    7.58
  -3 -19  -1  440.18   29.75
   3  19   1  420.61   24.92
  -4 -19  -1   48.81   10.96
  -5 -19  -1   58.45   13.37
  -6 -19  -1   13.16    9.89
  -7 -19  -1   40.30   12.71
  -8 -19  -1   63.51   15.35
  -9 -19  -1  105.64   19.54
 -10 -19  -1   34.61   14.45
 -11 -19  -1   13.96   13.79
 -12 -19  -1   65.95   18.81
 -15 -19  -1   94.65   26.55
 -16 -19  -1   75.83   25.49
  16 -20  -1  101.84   31.87
  15 -20  -1    1.94   21.02
  14 -20  -1   31.87   22.19
  13 -20  -1   29.88   23.11
  12 -20  -1   -6.70   15.47
  11 -20  -1  -17.95   14.58
  10 -20  -1  232.15   28.12
  10 -20  -1  209.34   28.89
   9 -20  -1   71.66   20.04
   9 -20  -1   64.44   17.99
   8 -20  -1   80.58   19.73
   8 -20  -1  110.06   21.46
   7 -20  -1   -1.55   10.09
   7 -20  -1    5.21   11.16
   6 -20  -1  404.49   31.46
   6 -20  -1  351.14   31.82
   5 -20  -1   98.73   17.52
   5 -20  -1   83.08   17.40
   4 -20  -1  392.71   31.44
   4 -20  -1  423.99   31.13
   3 -20  -1   19.14   10.00
   3 -20  -1    4.91    9.17
   2 -20  -1  396.82   30.41
   2 -20  -1  453.28   31.18
   1 -20  -1  131.62   14.15
   1 -20  -1  125.73   14.82
   0 -20  -1   -4.79    7.79
   0 -20  -1    3.66    6.16
  -1 -20  -1   30.99   10.01
  -1 -20  -1   27.33    7.81
  -2 -20  -1  275.33   22.05
  -2 -20  -1  276.29   18.84
  -3 -20  -1   49.31   11.12
  -5 -20  -1   10.74   10.01
  -6 -20  -1  110.61   18.05
  -7 -20  -1   48.39   15.06
  -8 -20  -1  423.53   32.42
  -9 -20  -1   72.10   17.05
 -10 -20  -1   11.78   12.98
 -11 -20  -1  179.13   25.57
 -12 -20  -1   65.66   19.83
 -15 -20  -1   -6.05   14.80
 -16 -20  -1  170.87   33.50
  16 -21  -1   -2.28   22.88
  15 -21  -1    1.54   19.78
  14 -21  -1  -26.46   16.05
  13 -21  -1   -8.92   18.70
  12 -21  -1   90.69   25.80
  11 -21  -1   15.89   18.20
  10 -21  -1  268.74   33.17
  10 -21  -1  154.83   30.54
   9 -21  -1   -8.37   12.54
   9 -21  -1   10.18   15.35
   8 -21  -1   87.03   20.53
   8 -21  -1   48.19   16.74
   7 -21  -1   23.27   14.56
   7 -21  -1    4.64   12.62
   6 -21  -1  405.58   31.92
   6 -21  -1  337.23   31.53
   5 -21  -1  267.33   24.52
   5 -21  -1  206.95   22.30
   4 -21  -1    8.61   10.90
   4 -21  -1   39.99   13.25
   3 -21  -1   20.21   11.71
   3 -21  -1   40.12   12.52
   2 -21  -1  144.40   16.78
   2 -21  -1  146.51   16.97
   1 -21  -1   21.03    9.42
   1 -21  -1   15.97   10.50
   0 -21  -1   91.07   14.75
   0 -21  -1  112.53   14.65
  -1 -21  -1   35.80    9.22
  -1 -21  -1   50.30   11.09
  -2 -21  -1  372.22   27.29
  -2 -21  -1  372.61   24.12
  -3 -21  -1   60.47   13.51
  -4 -21  -1  587.10   38.61
  -5 -21  -1   -3.56    9.06
  -6 -21  -1  341.56   27.11
  -7 -21  -1   50.40   14.57
  -8 -21  -1  197.33   26.09
  -9 -21  -1    1.32   11.23
 -10 -21  -1  195.18   21.52
 -11 -21  -1    5.77   12.78
 -12 -21  -1  435.43   35.48
 -15 -21  -1    9.41   17.62
  16 -22  -1   69.10   28.48
  15 -22  -1    0.31   19.12
  14 -22  -1  -18.04   19.45
  13 -22  -1   14.35   20.63
  12 -22  -1    3.31   19.25
  11 -22  -1   -3.20   16.93
  10 -22  -1   75.49   20.34
  10 -22  -1   25.99   19.28
   9 -22  -1  165.59   28.73
   9 -22  -1  132.66   24.81
   8 -22  -1   56.69   18.49
   8 -22  -1   39.61   17.63
   7 -22  -1  227.08   29.96
   7 -22  -1  179.61   27.52
   6 -22  -1   80.19   19.44
   6 -22  -1  115.67   21.39
   5 -22  -1    6.82   10.97
   5 -22  -1    3.36   11.15
   4 -22  -1   -2.49    9.60
   4 -22  -1   -4.48   10.07
   3 -22  -1   62.28   15.69
   3 -22  -1   85.11   16.36
   2 -22  -1  352.29   27.13
   2 -22  -1  289.86   26.08
   1 -22  -1  161.98   19.92
   1 -22  -1  129.76   17.97
   0 -22  -1   19.34    8.31
   0 -22  -1    4.45    9.81
  -1 -22  -1   10.45    9.44
  -1 -22  -1    4.91    7.12
  -2 -22  -1  903.31   53.81
  -3 -22  -1   58.54   14.00
  -4 -22  -1  494.96   34.40
  -5 -22  -1   -3.32    8.59
  -6 -22  -1   30.23   13.33
  -7 -22  -1   -8.57   11.13
  -8 -22  -1   62.80   17.88
  -9 -22  -1  193.73   26.33
 -10 -22  -1   54.67   17.22
 -11 -22  -1  112.79   22.52
 -12 -22  -1   40.06   19.49
 -15 -22  -1   32.85   21.00
  15 -23  -1   -6.26   22.43
  14 -23  -1   -3.61   20.18
  13 -23  -1   14.08   21.67
  12 -23  -1   26.97   20.51
  11 -23  -1   31.00   21.03
  10 -23  -1    4.99   15.57
  10 -23  -1  -13.47   13.74
   9 -23  -1   -5.42   12.32
   9 -23  -1   -2.83   14.43
   8 -23  -1   20.21   14.64
   8 -23  -1   -9.13   12.22
   7 -23  -1   20.62   13.30
   7 -23  -1    8.94   13.64
   6 -23  -1  -17.55   10.00
   6 -23  -1   -1.17   10.34
   5 -23  -1    7.60   11.90
   5 -23  -1   19.84   12.99
   4 -23  -1   -4.28   10.25
   4 -23  -1   -9.70    9.08
   3 -23  -1  283.34   24.94
   3 -23  -1  261.27   24.53
   2 -23  -1  117.88   19.65
   2 -23  -1  129.82   18.59
   1 -23  -1  117.84   14.77
   1 -23  -1  121.24   19.10
   0 -23  -1  123.42   14.21
   0 -23  -1  152.43   20.42
  -1 -23  -1  562.34   37.83
  -1 -23  -1  570.43   36.24
  -2 -23  -1  113.41   17.59
  -3 -23  -1  823.34   50.61
  -4 -23  -1  152.05   16.43
  -5 -23  -1  118.73   19.28
  -6 -23  -1  117.83   20.23
  -7 -23  -1   46.73   15.88
  -8 -23  -1  313.10   27.88
  -9 -23  -1   35.00   14.71
 -10 -23  -1   37.61   15.43
 -11 -23  -1  110.65   23.03
 -12 -23  -1    5.26   16.53
 -13 -23  -1   50.74   19.22
 -15 -23  -1   39.25   21.91
  15 -24  -1  -23.91   20.18
  14 -24  -1  -15.48   18.52
  13 -24  -1   61.76   26.31
  12 -24  -1   37.42   23.28
  11 -24  -1   33.27   20.58
  10 -24  -1   14.81   18.25
  10 -24  -1   56.09   20.05
   9 -24  -1   21.13   18.22
   9 -24  -1   41.57   19.03
   8 -24  -1   -0.51   14.01
   8 -24  -1   -4.88   13.38
   7 -24  -1  182.93   27.59
   7 -24  -1  115.13   23.80
   6 -24  -1    9.36   13.67
   6 -24  -1   11.34   12.74
   5 -24  -1  102.36   20.37
   5 -24  -1  131.60   23.07
   4 -24  -1  176.00   24.96
   4 -24  -1  173.09   23.75
   3 -24  -1   48.17   15.18
   3 -24  -1   59.31   16.31
   2 -24  -1  130.62   20.40
   2 -24  -1  135.37   19.61
   1 -24  -1  137.07   20.71
   1 -24  -1  132.41   15.37
   0 -24  -1  226.05   21.08
   0 -24  -1  201.71   18.88
  -1 -24  -1   34.01   12.78
  -2 -24  -1   95.68   16.61
  -3 -24  -1   17.85   11.43
  -4 -24  -1   -4.47    9.14
  -5 -24  -1   73.06   16.81
  -6 -24  -1   41.67   14.41
  -7 -24  -1  513.18   37.64
  -8 -24  -1  146.13   23.88
  -9 -24  -1  202.88   23.06
 -10 -24  -1   14.84   15.36
 -11 -24  -1  141.31   24.90
 -12 -24  -1   -4.49   15.76
 -13 -24  -1   41.60   21.04
 -15 -24  -1    4.31   17.52
  15 -25  -1  -10.55   21.56
  14 -25  -1  -18.25   19.94
  13 -25  -1    5.15   20.47
  12 -25  -1   63.99   26.26
  11 -25  -1   11.39   18.06
  10 -25  -1   -2.96   15.04
  10 -25  -1    3.72   15.49
   9 -25  -1   51.04   19.92
   9 -25  -1   60.25   20.73
   8 -25  -1  -12.95   13.93
   8 -25  -1  -12.30   11.73
   7 -25  -1   10.98   14.93
   7 -25  -1    2.57   14.09
   6 -25  -1  212.84   25.84
   6 -25  -1  240.79   25.33
   5 -25  -1   -6.74   10.76
   5 -25  -1    0.16   11.89
   4 -25  -1   -1.71    9.85
   4 -25  -1  -11.07   10.47
   3 -25  -1    6.55   12.34
   3 -25  -1   40.22   14.81
   2 -25  -1  192.46   21.24
   2 -25  -1  230.20   22.26
   1 -25  -1  174.61   18.86
   1 -25  -1  201.37   20.42
   0 -25  -1   49.04   12.53
   0 -25  -1   55.22   15.09
  -1 -25  -1  664.40   43.23
  -2 -25  -1   16.69    9.43
  -3 -25  -1  178.45   19.12
  -4 -25  -1   11.33   11.91
  -5 -25  -1  270.58   24.79
  -7 -25  -1   45.30   16.40
  -8 -25  -1  120.03   21.75
  -9 -25  -1  121.63   22.71
 -10 -25  -1   30.85   16.77
 -11 -25  -1   15.06   16.70
 -12 -25  -1   72.71   22.70
 -13 -25  -1   46.09   21.79
  15 -26  -1  -17.07   21.08
  14 -26  -1   25.94   24.72
  13 -26  -1  -25.21   16.33
  12 -26  -1   -0.46   19.68
  11 -26  -1   11.61   19.65
  10 -26  -1   31.25   20.65
   9 -26  -1   44.51   20.52
   9 -26  -1   82.25   22.98
   8 -26  -1   62.36   20.94
   8 -26  -1   57.14   20.40
   7 -26  -1   46.41   17.97
   7 -26  -1   38.13   18.97
   6 -26  -1   22.20   14.59
   6 -26  -1   -6.18   11.62
   5 -26  -1   -8.39   11.86
   5 -26  -1  -15.59   10.02
   4 -26  -1   24.12   13.76
   4 -26  -1    0.71   12.39
   3 -26  -1   -1.12   11.39
   3 -26  -1    7.93   11.56
   2 -26  -1  369.45   29.84
   2 -26  -1  326.71   29.22
   1 -26  -1    2.93    9.42
   1 -26  -1   16.42   12.06
   0 -26  -1   22.40   10.65
   0 -26  -1   17.19   10.83
  -1 -26  -1   31.73   13.08
  -2 -26  -1  837.92   52.19
  -3 -26  -1  143.56   21.03
  -4 -26  -1  120.38   20.08
  -5 -26  -1   33.58   13.81
  -6 -26  -1    1.04   12.48
  -7 -26  -1    9.97   13.86
  -8 -26  -1    5.57   12.29
  -9 -26  -1   39.24   15.66
 -10 -26  -1  115.12   22.70
 -11 -26  -1   -5.96   16.05
 -12 -26  -1   18.59   16.48
 -13 -26  -1   27.06   19.41
  14 -27  -1    8.91   22.26
  13 -27  -1   -5.48   20.93
  12 -27  -1   34.90   24.05
  11 -27  -1   -7.57   18.86
  10 -27  -1   73.90   23.60
   9 -27  -1  -13.05   16.32
   9 -27  -1   -2.90   14.97
   8 -27  -1  232.16   35.02
   8 -27  -1  213.74   33.18
   7 -27  -1   28.31   17.18
   7 -27  -1   19.02   18.19
   6 -27  -1  256.65   28.05
   6 -27  -1  245.96   27.06
   5 -27  -1   61.76   18.93
   5 -27  -1   92.88   21.80
   4 -27  -1   79.03   19.55
   4 -27  -1   51.92   17.10
   3 -27  -1   -0.53   10.72
   3 -27  -1   -3.69   11.81
   2 -27  -1  109.91   21.26
   2 -27  -1  153.62   22.21
   1 -27  -1   21.36   12.46
   1 -27  -1   25.85   11.15
   0 -27  -1   58.41   16.62
  -1 -27  -1   48.02   14.96
  -2 -27  -1  131.03   20.65
  -3 -27  -1   50.09   15.24
  -4 -27  -1  236.65   23.23
  -5 -27  -1   -4.09    9.20
  -6 -27  -1   63.99   18.13
  -7 -27  -1   -7.87   10.61
  -9 -27  -1   37.58   16.50
 -10 -27  -1  221.41   31.21
 -11 -27  -1   -6.86   15.54
 -12 -27  -1   44.32   20.54
 -13 -27  -1  -17.99   16.26
  14 -28  -1   67.46   29.01
  13 -28  -1  -13.67   20.37
  12 -28  -1   22.93   22.17
  11 -28  -1   -3.46   19.67
  10 -28  -1  -23.11   15.62
   9 -28  -1   -2.62   16.60
   9 -28  -1   -2.82   17.34
   8 -28  -1   13.55   18.05
   8 -28  -1   92.64   23.93
   7 -28  -1   11.30   18.65
   7 -28  -1   14.73   16.36
   6 -28  -1   48.70   19.70
   6 -28  -1   66.52   20.83
   5 -28  -1   76.21   20.43
   5 -28  -1   83.60   21.84
   4 -28  -1  184.43   27.61
   4 -28  -1  131.56   23.27
   3 -28  -1   51.83   15.49
   3 -28  -1   25.18   15.57
   2 -28  -1   66.07   15.97
   2 -28  -1   43.79   15.45
   1 -28  -1   51.76   16.58
   1 -28  -1   70.14   16.12
   0 -28  -1  295.08   26.95
  -1 -28  -1   18.94   13.64
  -3 -28  -1   18.80   12.94
  -4 -28  -1   24.76   14.32
  -5 -28  -1   51.46   16.02
  -6 -28  -1  140.46   22.61
  -7 -28  -1  107.72   21.75
  -8 -28  -1  110.53   22.26
 -10 -28  -1    9.72   15.66
 -11 -28  -1   69.80   22.44
 -12 -28  -1   -5.59   16.13
 -13 -28  -1   58.10   21.97
  14 -29  -1  -18.33   22.25
  13 -29  -1    7.88   22.23
  12 -29  -1  -17.52   16.76
  11 -29  -1   -2.63   20.99
  10 -29  -1   49.15   24.45
   9 -29  -1   -0.66   18.33
   9 -29  -1    0.97   15.30
   8 -29  -1  167.57   31.52
   8 -29  -1  286.35   39.48
   7 -29  -1   10.41   16.78
   7 -29  -1   15.16   17.94
   6 -29  -1   -4.30   13.80
   6 -29  -1  -11.94   14.66
   5 -29  -1   30.48   18.04
   5 -29  -1   40.98   20.00
   4 -29  -1   60.54   18.77
   4 -29  -1   53.25   17.91
   3 -29  -1   43.41   16.03
   3 -29  -1   31.50   14.51
   2 -29  -1   57.19   16.91
   2 -29  -1   76.41   19.62
   1 -29  -1   50.76   15.27
   0 -29  -1   37.13   15.30
  -1 -29  -1  329.13   28.13
  -2 -29  -1   21.99   13.78
  -3 -29  -1  132.65   22.11
  -4 -29  -1  157.39   23.69
  -5 -29  -1  457.18   35.70
  -6 -29  -1   -4.87   12.47
  -7 -29  -1    0.46   14.54
  -8 -29  -1   17.17   15.37
  -9 -29  -1   16.72   16.81
 -10 -29  -1    6.86   15.67
 -11 -29  -1  -13.96   12.98
 -12 -29  -1  -10.30   14.69
 -13 -29  -1   52.18   21.52
  13 -30  -1  -11.65   19.93
  12 -30  -1   31.47   24.03
  11 -30  -1   81.77   28.41
  10 -30  -1   15.17   20.46
   9 -30  -1  240.75   38.88
   9 -30  -1  184.91   33.69
   8 -30  -1   16.41   19.59
   8 -30  -1  -13.50   14.13
   7 -30  -1   95.74   24.03
   7 -30  -1   77.22   24.77
   6 -30  -1   32.51   19.82
   6 -30  -1   28.63   18.34
   5 -30  -1  190.34   28.84
   5 -30  -1  145.76   26.38
   4 -30  -1   53.76   18.79
   4 -30  -1   50.98   18.07
   3 -30  -1   -0.51   13.94
   3 -30  -1   -0.48   13.03
   2 -30  -1   -0.14   13.29
   2 -30  -1  -11.78   11.18
   1 -30  -1   19.81   15.16
   0 -30  -1   28.48   15.32
  -1 -30  -1    8.76   13.46
  -2 -30  -1   -7.82   11.55
  -3 -30  -1   43.94   16.94
  -4 -30  -1  122.48   22.27
  -5 -30  -1   87.29   20.12
  -6 -30  -1  -12.29   12.30
  -7 -30  -1  103.41   22.71
  -8 -30  -1   -5.93   10.83
  -9 -30  -1   81.02   22.29
 -10 -30  -1   -3.35   15.79
 -11 -30  -1   46.92   20.28
 -12 -30  -1  -14.03   16.55
 -13 -30  -1   56.29   22.66
  13 -31  -1   69.44   29.92
  12 -31  -1    8.23   22.55
  11 -31  -1   -7.36   21.51
  10 -31  -1   38.97   23.12
   9 -31  -1   13.84   21.29
   9 -31  -1    9.08   19.49
   8 -31  -1   28.43   19.27
   8 -31  -1   15.27   19.60
   7 -31  -1  115.03   25.92
   7 -31  -1  124.91   29.67
   6 -31  -1   18.87   17.41
   6 -31  -1   33.57   18.51
   5 -31  -1  170.39   28.54
   5 -31  -1  206.14   30.23
   4 -31  -1   56.11   19.44
   4 -31  -1   40.09   18.38
   3 -31  -1  126.59   23.83
   3 -31  -1  118.64   24.47
   2 -31  -1  -20.38   10.76
   1 -31  -1   81.53   18.17
   0 -31  -1   63.77   18.60
  -1 -31  -1   36.13   17.48
  -2 -31  -1  -31.19    9.27
  -3 -31  -1   54.51   18.05
  -4 -31  -1    0.25   12.20
  -5 -31  -1   23.95   15.09
  -6 -31  -1   38.05   17.58
  -7 -31  -1   39.31   17.70
  -8 -31  -1  112.01   23.50
  -9 -31  -1   28.61   16.03
 -10 -31  -1   81.44   22.85
 -11 -31  -1  -22.27   15.79
 -12 -31  -1   -7.23   16.25
 -13 -31  -1    6.48   19.93
  13 -32  -1   -1.23   21.73
  12 -32  -1   40.45   26.31
  11 -32  -1   72.08   29.03
  10 -32  -1   -5.93   19.64
   9 -32  -1   26.95   23.32
   9 -32  -1   16.78   21.77
   8 -32  -1   19.17   21.11
   8 -32  -1    3.19   18.35
   7 -32  -1   40.99   19.68
   7 -32  -1   16.49   18.73
   6 -32  -1   65.10   23.42
   6 -32  -1   94.57   24.96
   5 -32  -1   59.00   22.84
   5 -32  -1   36.79   19.12
   4 -32  -1  229.04   31.90
   4 -32  -1  206.74   32.22
   3 -32  -1   40.30   18.66
   3 -32  -1   38.89   17.24
   2 -32  -1    3.96   14.66
   1 -32  -1   34.53   17.86
   0 -32  -1  220.35   30.58
  -1 -32  -1  164.40   26.93
  -2 -32  -1    0.28   13.20
  -3 -32  -1   -6.04   12.56
  -4 -32  -1   29.29   15.96
  -5 -32  -1   17.26   15.83
  -6 -32  -1  150.70   25.88
  -7 -32  -1   19.64   16.82
  -8 -32  -1   -8.52   14.72
  -9 -32  -1    6.63   15.43
 -10 -32  -1   13.78   18.42
 -11 -32  -1    5.56   19.00
 -12 -32  -1  -15.57   17.84
  12 -33  -1   59.45   27.12
  11 -33  -1    8.58   20.74
  10 -33  -1   56.01   26.21
   9 -33  -1    2.46   20.23
   8 -33  -1  262.69   40.97
   8 -33  -1  311.63   41.38
   7 -33  -1   13.26   18.59
   7 -33  -1  -19.22   17.69
   6 -33  -1   13.91   19.00
   6 -33  -1   42.94   21.76
   5 -33  -1   27.06   18.47
   5 -33  -1    3.91   16.95
   4 -33  -1  104.71   24.59
   4 -33  -1  118.68   26.52
   3 -33  -1  117.99   25.61
   2 -33  -1  -15.45   10.55
   1 -33  -1   -2.48   13.87
   0 -33  -1    4.21   15.11
  -1 -33  -1   14.02   13.34
  -2 -33  -1  -15.53    9.81
  -3 -33  -1    8.77   13.76
  -4 -33  -1   88.52   21.70
  -5 -33  -1   77.45   20.87
  -6 -33  -1   47.52   18.84
  -7 -33  -1   -8.13   13.56
  -8 -33  -1   54.83   20.71
  -9 -33  -1   -4.32   16.26
 -10 -33  -1   81.14   24.07
 -11 -33  -1   -0.57   16.48
 -12 -33  -1   10.07   20.66
  12 -34  -1   74.44   29.38
  11 -34  -1   17.24   21.64
  10 -34  -1  -12.51   19.65
   9 -34  -1   97.72   29.01
   8 -34  -1  -12.51   18.20
   8 -34  -1   31.23   22.92
   7 -34  -1   16.36   21.43
   7 -34  -1   52.43   23.09
   6 -34  -1    8.35   18.48
   6 -34  -1    7.61   17.38
   5 -34  -1   42.94   22.09
   5 -34  -1   40.92   20.88
   4 -34  -1  245.64   34.02
   4 -34  -1  271.39   37.38
   3 -34  -1   16.49   18.05
   2 -34  -1  166.88   29.17
   1 -34  -1   22.09   16.83
   0 -34  -1   28.42   16.84
  -1 -34  -1   -0.66   14.70
  -2 -34  -1  115.01   24.13
  -3 -34  -1    0.96   10.68
  -4 -34  -1    7.04   15.58
  -5 -34  -1   -6.91   14.56
  -6 -34  -1   12.32   16.06
  -7 -34  -1   22.93   16.21
  -8 -34  -1  -17.27   15.23
  -9 -34  -1   42.01   20.01
 -10 -34  -1   -3.81   17.40
 -11 -34  -1    3.88   18.91
  11 -35  -1   13.92   23.74
  10 -35  -1   -5.04   19.95
   9 -35  -1  -18.95   17.79
   8 -35  -1   27.25   23.62
   8 -35  -1   -6.67   19.07
   7 -35  -1   41.04   22.01
   7 -35  -1   31.42   24.17
   6 -35  -1  -10.15   17.20
   6 -35  -1  -10.28   16.57
   5 -35  -1  -14.44   14.94
   5 -35  -1   22.84   20.67
   4 -35  -1   39.41   21.77
   3 -35  -1  294.60   38.69
   2 -35  -1   37.91   18.31
   1 -35  -1   62.05   21.58
   0 -35  -1    5.76   16.65
  -1 -35  -1   21.04   17.26
  -2 -35  -1   -1.22   15.55
  -3 -35  -1   80.19   18.90
  -4 -35  -1   85.59   22.04
  -5 -35  -1    0.23   15.01
  -6 -35  -1   16.59   17.27
  -7 -35  -1   75.24   19.34
  -8 -35  -1   -4.56   16.82
  -9 -35  -1  -14.93   15.67
 -10 -35  -1  -20.90   15.42
 -11 -35  -1   25.32   19.68
  11 -36  -1  133.33   35.47
  10 -36  -1  -10.38   18.99
   9 -36  -1   -3.61   18.78
   8 -36  -1  -27.67   16.73
   8 -36  -1   -5.92   20.41
   7 -36  -1  109.93   27.35
   7 -36  -1   72.64   27.80
   6 -36  -1  -11.68   15.21
   6 -36  -1  -14.81   19.14
   5 -36  -1  118.54   27.05
   5 -36  -1  106.09   28.63
   4 -36  -1    6.06   18.36
   3 -36  -1   59.43   22.93
   2 -36  -1   -0.83   16.01
   1 -36  -1  226.95   33.70
   0 -36  -1    3.43   16.65
  -1 -36  -1   60.16   21.32
  -2 -36  -1  -14.79   14.99
  -3 -36  -1   57.88   19.64
  -4 -36  -1    8.80   15.64
  -5 -36  -1   98.48   23.64
  -6 -36  -1   36.90   19.73
  -7 -36  -1  164.67   25.34
  -8 -36  -1   -2.10   16.45
  -9 -36  -1   -4.10   16.26
 -10 -36  -1   -5.46   17.43
 -11 -36  -1   77.98   25.00
  10 -37  -1  -18.53   20.85
   9 -37  -1    0.20   19.71
   8 -37  -1    3.54   19.13
   8 -37  -1    2.98   24.26
   7 -37  -1   28.61   21.76
   7 -37  -1    7.60   22.09
   6 -37  -1   18.51   21.81
   6 -37  -1  -17.87   14.93
   5 -37  -1    4.15   18.81
   4 -37  -1   27.76   20.15
   3 -37  -1  122.79   28.09
   2 -37  -1   18.78   16.80
   1 -37  -1   91.50   24.22
   0 -37  -1   -3.13   15.74
  -1 -37  -1  105.47   25.05
  -2 -37  -1    5.76   16.41
  -3 -37  -1  150.81   28.03
  -4 -37  -1   11.83   16.99
  -5 -37  -1    0.70   15.64
  -6 -37  -1   61.49   21.27
  -7 -37  -1   13.20   16.17
  -8 -37  -1   -3.61   15.81
  -9 -37  -1  -24.03   16.97
 -10 -37  -1   21.11   17.62
  10 -38  -1  -21.63   20.26
   9 -38  -1   -6.76   19.62
   8 -38  -1   11.42   25.34
   8 -38  -1  -23.61   18.54
   7 -38  -1    6.72   20.52
   7 -38  -1   26.31   24.21
   6 -38  -1  -17.45   19.00
   5 -38  -1   -3.45   20.04
   4 -38  -1   55.40   25.59
   3 -38  -1    0.73   17.25
   2 -38  -1  106.57   26.74
   1 -38  -1   14.04   16.58
   0 -38  -1  147.96   28.59
  -1 -38  -1    1.56   14.46
  -2 -38  -1  191.44   30.79
  -3 -38  -1   30.76   19.01
  -4 -38  -1   17.80   17.76
  -5 -38  -1    5.84   16.20
  -6 -38  -1   40.12   20.51
  -7 -38  -1   -0.94   16.42
  -8 -38  -1   -8.93   14.36
  -9 -38  -1   -4.95   17.27
   9 -39  -1   -6.68   21.24
   8 -39  -1   69.58   28.06
   7 -39  -1  -15.98   18.93
   7 -39  -1    1.81   22.32
   6 -39  -1   16.65   23.38
   5 -39  -1   10.26   21.40
   4 -39  -1   62.23   24.48
   3 -39  -1    5.05   19.27
   2 -39  -1   50.55   21.66
   1 -39  -1   -2.26   16.54
   0 -39  -1    6.87   17.68
  -1 -39  -1   14.37   17.63
  -2 -39  -1   22.94   16.57
  -3 -39  -1    5.58   17.29
  -4 -39  -1   98.17   24.69
  -5 -39  -1   -7.24   15.69
  -6 -39  -1   80.72   23.59
  -7 -39  -1    9.32   18.21
  -8 -39  -1   39.53   19.87
  -9 -39  -1  -22.08   16.03
   8 -40  -1   13.33   21.41
   7 -40  -1   55.99   28.32
   6 -40  -1   47.50   25.45
   5 -40  -1    2.59   20.68
   4 -40  -1   53.75   23.61
   3 -40  -1   -8.60   18.04
   2 -40  -1    4.34   17.24
   1 -40  -1   92.30   25.89
   0 -40  -1  103.30   26.55
  -1 -40  -1   -1.04   15.27
  -2 -40  -1   43.13   20.08
  -3 -40  -1   21.88   18.39
  -4 -40  -1   15.10   17.95
  -5 -40  -1   28.72   19.84
  -6 -40  -1   14.10   16.77
  -7 -40  -1   72.97   23.91
  -8 -40  -1   -3.76   16.37
   7 -41  -1   30.28   28.54
   6 -41  -1    7.67   24.22
   5 -41  -1   -3.15   21.82
   4 -41  -1   -3.03   19.09
   3 -41  -1   48.52   24.11
   2 -41  -1   17.24   19.18
   1 -41  -1   71.36   22.54
   0 -41  -1   42.06   19.82
  -1 -41  -1   62.73   22.15
  -2 -41  -1    0.67   17.06
  -3 -41  -1   52.61   21.67
  -4 -41  -1    1.36   17.34
  -5 -41  -1    4.78   17.78
  -6 -41  -1    1.32   17.59
  -7 -41  -1   10.59   18.41
   7 -42  -1   25.99   27.85
   6 -42  -1    3.44   22.48
   5 -42  -1   57.97   27.01
   4 -42  -1   15.79   20.99
   3 -42  -1    8.68   19.66
   2 -42  -1  -11.54   17.98
   1 -42  -1   -7.29   15.84
   0 -42  -1   16.29   20.32
  -1 -42  -1   -1.55   16.08
  -2 -42  -1    2.17   18.29
  -3 -42  -1   -9.08   16.53
  -4 -42  -1   -1.94   16.57
  -5 -42  -1   16.33   18.85
  -6 -42  -1   -3.94   18.14
   6 -43  -1   -4.31   24.00
   5 -43  -1   46.27   25.73
   4 -43  -1    8.18   21.24
   3 -43  -1   40.68   23.04
   2 -43  -1   -0.22   21.91
   1 -43  -1    8.78   20.47
   0 -43  -1    2.80   19.01
  -1 -43  -1   30.36   21.60
  -2 -43  -1  -14.59   17.28
  -3 -43  -1   -9.51   13.19
  -4 -43  -1  -14.45   13.30
  -5 -43  -1   14.33   19.16
   5 -44  -1    2.13   23.16
   4 -44  -1   46.26   25.59
   3 -44  -1   -9.70   18.37
   2 -44  -1   11.90   19.00
   1 -44  -1   23.33   19.83
   0 -44  -1   36.00   22.54
  -1 -44  -1   -3.21   18.12
  -2 -44  -1  -23.28   15.42
  -3 -44  -1   -3.93   16.05
  -4 -44  -1  -11.94   15.47
   3 -45  -1    5.61   20.80
   2 -45  -1   34.05   24.27
   1 -45  -1    4.64   19.55
   0 -45  -1   17.49   20.08
  -1 -45  -1   -8.37   17.70
  -2 -45  -1  -11.13   16.81
  -3 -45   2   29.72   19.16
  -2 -45   2    9.64   19.68
  -1 -45   2   72.24   24.44
   0 -45   2    8.50   21.01
   1 -45   2   -4.43   19.13
   2 -45   2  -15.46   19.24
  -4 -44   2  -16.41   15.94
  -3 -44   2   -5.30   15.00
  -2 -44   2    7.72   20.07
  -1 -44   2   -0.23   18.25
   0 -44   2   39.50   21.88
   1 -44   2  -24.83   18.69
   2 -44   2  -16.03   19.53
   3 -44   2    6.24   22.00
   4 -44   2  -10.84   21.40
  -6 -43   2   11.65   18.79
  -5 -43   2   -8.78   15.37
  -4 -43   2   18.34   19.19
  -3 -43   2   -5.13   17.90
  -2 -43   2    9.38   18.94
  -1 -43   2   47.97   20.42
   0 -43   2   13.42   20.04
   1 -43   2  -13.73   17.18
   2 -43   2    1.63   19.58
   3 -43   2    6.70   21.41
   4 -43   2   45.57   24.60
  -7 -42   2  -18.94   16.26
  -6 -42   2    4.07   15.42
  -5 -42   2   -5.48   15.29
  -4 -42   2   39.41   20.79
  -3 -42   2   -1.02   17.09
  -2 -42   2   16.89   19.18
  -1 -42   2   45.07   21.64
   0 -42   2   84.77   25.61
   1 -42   2   -5.49   17.84
   2 -42   2   -1.26   17.05
   3 -42   2   -3.08   19.63
   4 -42   2    8.71   21.79
  -8 -41   2   17.59   15.39
  -7 -41   2   -7.69   16.45
  -6 -41   2   10.00   16.10
  -5 -41   2  -11.05   16.98
  -4 -41   2   -5.80   15.33
  -3 -41   2    7.84   17.53
  -2 -41   2   20.18   19.12
  -1 -41   2   15.27   19.35
   0 -41   2    9.17   19.41
   1 -41   2  -12.88   17.49
   2 -41   2  -18.50   16.87
   3 -41   2    9.04   20.93
   4 -41   2    4.74   21.83
   5 -41   2  -14.91   18.93
  -9 -40   2    2.51   19.94
  -8 -40   2    0.55   15.51
  -7 -40   2    3.76   16.00
  -6 -40   2   -8.57   15.23
  -5 -40   2   -8.49   17.12
  -4 -40   2  -19.12   14.32
  -3 -40   2  -16.58   14.26
  -2 -40   2   -4.76   17.60
  -1 -40   2   -3.34   16.50
   0 -40   2   13.86   18.84
   1 -40   2   -5.79   15.19
   2 -40   2  110.29   27.75
   3 -40   2   11.73   20.67
   4 -40   2   25.19   21.67
   5 -40   2    7.84   23.32
   7 -40   2   32.71   22.36
   8 -40   2  -14.96   20.76
  -9 -39   2  -14.41   16.37
  -8 -39   2    3.09   19.08
  -7 -39   2   52.49   20.04
  -6 -39   2  -13.98   14.15
  -5 -39   2  -12.13   15.02
  -4 -39   2  -27.07   13.62
  -3 -39   2   42.91   18.77
  -2 -39   2   56.55   21.08
  -1 -39   2   13.95   18.39
   0 -39   2   -1.57   15.77
   1 -39   2   22.77   19.70
   2 -39   2   13.50   17.64
   3 -39   2   99.43   25.71
   4 -39   2   -5.86   18.92
   5 -39   2   -1.15   20.71
   7 -39   2   11.43   21.48
   8 -39   2    2.45   20.39
 -10 -38   2  -12.08   18.38
  -9 -38   2  -13.17   16.15
  -8 -38   2  -14.29   15.58
  -7 -38   2   14.96   16.93
  -6 -38   2   -9.37   14.64
  -5 -38   2    9.93   16.42
  -4 -38   2  -17.62   13.39
  -3 -38   2    6.52   12.86
  -2 -38   2    0.08   15.96
  -1 -38   2  105.88   25.79
   0 -38   2   -6.53   14.11
   1 -38   2   -4.68   16.87
   2 -38   2  -10.26   15.77
   3 -38   2  -10.38   16.76
   4 -38   2   -6.53   18.25
   5 -38   2   17.79   19.45
   6 -38   2   11.23   20.39
   7 -38   2  180.77   34.57
   8 -38   2   -2.82   22.36
   9 -38   2  -10.51   21.50
 -11 -37   2   13.45   22.61
 -10 -37   2  -14.46   16.54
  -9 -37   2  -32.78   13.32
  -8 -37   2   36.89   19.45
  -7 -37   2   14.73   16.99
  -6 -37   2   -4.64   14.86
  -5 -37   2  -12.20   13.75
  -4 -37   2    2.36   14.03
  -3 -37   2   51.78   17.77
  -2 -37   2   20.57   17.23
  -1 -37   2    7.94   16.60
   0 -37   2   -4.20   15.24
   1 -37   2   41.70   19.88
   2 -37   2   15.41   17.69
   3 -37   2   44.53   21.04
   4 -37   2   45.44   22.55
   5 -37   2   -8.43   16.22
   5 -37   2   -4.58   16.25
   6 -37   2   81.67   24.77
   7 -37   2   39.37   21.03
   8 -37   2   40.54   24.23
   9 -37   2   -5.60   20.33
  10 -37   2   60.17   26.79
 -11 -36   2    0.87   19.14
 -10 -36   2  -26.69   13.90
  -9 -36   2   13.25   15.97
  -8 -36   2   45.08   18.60
  -7 -36   2   13.08   17.08
  -6 -36   2   -5.30   14.24
  -5 -36   2    0.31   14.61
  -4 -36   2  134.18   25.29
  -3 -36   2   21.43   16.10
  -2 -36   2   28.49   17.01
  -1 -36   2    2.12   14.57
   0 -36   2   30.79   19.62
   1 -36   2   -7.29   14.96
   2 -36   2  204.80   32.80
   3 -36   2   44.56   19.89
   4 -36   2   25.04   20.56
   5 -36   2   -7.79   17.51
   5 -36   2   -7.77   14.96
   6 -36   2   32.13   20.10
   7 -36   2    3.81   18.48
   8 -36   2   10.70   20.93
   9 -36   2    9.29   21.19
  10 -36   2   -5.27   23.00
 -12 -35   2   22.18   21.17
 -11 -35   2   12.51   18.56
 -10 -35   2   14.57   17.43
  -9 -35   2    3.70   17.62
  -8 -35   2  142.25   27.05
  -7 -35   2   26.24   17.18
  -6 -35   2   61.46   18.16
  -5 -35   2   12.11   12.71
  -4 -35   2   67.80   19.59
  -3 -35   2   34.88   16.39
  -2 -35   2   69.87   19.77
  -1 -35   2   -7.56   11.63
   0 -35   2   -8.96   15.29
   1 -35   2   -3.98   15.90
   2 -35   2   -5.65   15.31
   3 -35   2  103.85   24.78
   4 -35   2   16.11   18.28
   4 -35   2   31.10   19.68
   5 -35   2   -9.23   16.59
   5 -35   2   -6.23   15.34
   6 -35   2   72.79   24.81
   6 -35   2  117.76   26.58
   7 -35   2   -6.87   18.60
   8 -35   2   71.34   26.22
   9 -35   2    3.61   18.74
  10 -35   2   72.02   28.23
  11 -35   2   25.03   27.30
 -12 -34   2   53.23   23.77
 -11 -34   2   38.65   18.63
 -10 -34   2   15.06   18.81
  -9 -34   2    7.55   17.04
  -8 -34   2    8.81   16.90
  -7 -34   2   53.73   19.22
  -6 -34   2   41.38   16.80
  -5 -34   2   35.05   16.39
  -4 -34   2   57.64   18.19
  -3 -34   2   -3.76   12.46
  -2 -34   2   49.48   18.51
  -1 -34   2   63.76   19.50
   0 -34   2  251.69   33.24
   1 -34   2   84.23   22.05
   2 -34   2   34.30   18.14
   3 -34   2   22.25   17.13
   4 -34   2   11.54   19.10
   4 -34   2    7.73   17.68
   5 -34   2  -22.33   15.98
   5 -34   2   -5.25   13.70
   6 -34   2    7.61   17.19
   6 -34   2   34.69   21.96
   7 -34   2  209.37   34.61
   8 -34   2    2.93   18.87
   9 -34   2  -25.40   16.25
  10 -34   2  -15.49   20.43
  11 -34   2    5.28   23.81
 -12 -33   2   33.56   22.48
 -11 -33   2   30.58   21.81
 -10 -33   2   17.70   19.84
  -9 -33   2    2.05   15.84
  -8 -33   2   -4.08   15.45
  -7 -33   2   81.12   20.84
  -6 -33   2   20.96   16.63
  -5 -33   2   84.34   21.37
  -4 -33   2   74.06   18.07
  -3 -33   2  127.02   23.93
  -2 -33   2   18.47   14.81
  -1 -33   2  173.47   26.68
   0 -33   2   81.26   20.74
   1 -33   2   41.31   18.20
   2 -33   2    7.95   16.02
   3 -33   2   53.10   19.57
   3 -33   2   31.76   17.45
   4 -33   2  -12.24   14.37
   4 -33   2  -14.67   15.17
   5 -33   2  -13.68   14.43
   5 -33   2   -1.54   14.48
   6 -33   2   11.22   17.38
   6 -33   2   -0.80   17.27
   7 -33   2   15.64   18.92
   8 -33   2   20.18   20.28
   9 -33   2   11.66   20.34
  10 -33   2  -11.95   18.89
  11 -33   2    7.37   24.21
  12 -33   2  -22.84   22.12
 -13 -32   2  -26.43   18.43
 -12 -32   2   30.72   20.43
 -11 -32   2   25.17   21.62
 -10 -32   2  -23.25   13.94
  -9 -32   2  162.24   27.50
  -8 -32   2   15.08   15.69
  -7 -32   2  133.78   24.95
  -6 -32   2   21.47   15.51
  -5 -32   2  242.66   25.90
  -4 -32   2  222.73   24.14
  -3 -32   2  -15.22   11.84
  -2 -32   2   -6.47   11.68
  -1 -32   2   34.35   15.71
   0 -32   2   -0.58   12.37
   1 -32   2   15.01   15.20
   2 -32   2    5.27   14.89
   2 -32   2   -5.53   12.69
   3 -32   2   71.06   20.83
   3 -32   2   88.98   20.50
   4 -32   2    0.31   15.47
   4 -32   2   20.68   16.19
   5 -32   2  167.44   29.23
   5 -32   2  188.85   30.08
   6 -32   2   -5.71   14.25
   6 -32   2   -0.50   15.47
   7 -32   2   38.84   21.54
   8 -32   2   -1.79   17.73
   9 -32   2   45.49   22.75
  10 -32   2  -14.72   19.97
  11 -32   2    5.35   22.45
  12 -32   2  -12.00   21.80
 -13 -31   2   26.53   22.69
 -12 -31   2    2.11   20.09
 -11 -31   2   -0.28   14.90
 -10 -31   2   62.93   22.71
  -9 -31   2   31.86   19.42
  -8 -31   2  220.42   25.87
  -7 -31   2    2.52   14.06
  -6 -31   2   90.48   20.43
  -5 -31   2   22.95   14.91
  -4 -31   2   93.75   20.80
  -3 -31   2   -7.11   11.83
  -2 -31   2  -15.08   10.89
  -1 -31   2  152.77   24.27
   0 -31   2  124.83   22.97
   1 -31   2  224.21   24.66
   2 -31   2   -2.63   11.60
   2 -31   2  -16.24   11.50
   3 -31   2   32.11   18.67
   3 -31   2   30.10   16.10
   4 -31   2  107.87   23.76
   4 -31   2  102.45   22.69
   5 -31   2  233.76   26.79
   5 -31   2  208.47   26.73
   6 -31   2   18.38   17.72
   6 -31   2   48.33   19.94
   7 -31   2  -11.75   15.18
   8 -31   2   11.18   18.41
   9 -31   2    0.48   18.95
  10 -31   2   60.94   26.24
  11 -31   2   -1.40   19.74
  12 -31   2    9.40   23.23
 -14 -30   2   64.80   26.42
 -13 -30   2  -29.14   16.68
 -12 -30   2   55.12   24.38
 -11 -30   2  -17.32   17.37
 -10 -30   2   39.71   19.95
  -9 -30   2    2.01   16.05
  -8 -30   2   92.07   23.06
  -7 -30   2    6.57   11.46
  -6 -30   2   54.74   16.97
  -5 -30   2   -6.14   10.08
  -4 -30   2  189.38   22.46
  -3 -30   2   28.63   15.93
  -2 -30   2   66.34   17.71
  -1 -30   2    1.53   12.76
   0 -30   2  723.63   49.14
   1 -30   2   39.29   16.26
   1 -30   2   35.24   14.50
   2 -30   2  163.58   24.28
   2 -30   2  110.58   22.96
   3 -30   2    3.36   11.35
   3 -30   2  -22.56   12.00
   4 -30   2   44.27   17.93
   4 -30   2   77.51   20.72
   5 -30   2  106.86   23.13
   5 -30   2   95.53   22.49
   6 -30   2   27.98   19.19
   6 -30   2   47.76   20.14
   7 -30   2   -0.91   14.50
   8 -30   2   42.18   22.63
   9 -30   2   74.25   25.50
  10 -30   2   -5.74   17.55
  11 -30   2   14.78   21.19
  12 -30   2   37.82   25.81
  13 -30   2   18.74   24.07
 -14 -29   2  -20.74   15.54
 -13 -29   2   57.12   22.54
 -12 -29   2   10.79   16.72
 -11 -29   2   -7.25   17.58
 -10 -29   2  116.35   22.15
  -9 -29   2  104.46   22.88
  -8 -29   2   55.46   19.21
  -7 -29   2   99.41   22.20
  -6 -29   2  205.00   23.40
  -5 -29   2   80.27   19.39
  -4 -29   2  220.51   23.61
  -3 -29   2   49.54   16.45
  -2 -29   2    3.00   11.90
  -1 -29   2   39.75   15.39
   0 -29   2   34.31   15.23
   1 -29   2    3.93   11.76
   1 -29   2   -3.43   12.13
   2 -29   2   11.64   12.68
   2 -29   2   13.46   13.20
   3 -29   2  -11.65   11.37
   3 -29   2    9.49   13.77
   4 -29   2  252.12   27.60
   4 -29   2  258.35   26.85
   5 -29   2   30.08   16.09
   5 -29   2   19.85   16.04
   6 -29   2  219.91   31.69
   6 -29   2  180.22   31.20
   7 -29   2   -1.50   16.41
   7 -29   2   -4.13   14.94
   8 -29   2  280.19   33.11
   9 -29   2   20.41   20.22
  10 -29   2  157.77   31.69
  11 -29   2    7.19   21.02
  12 -29   2   43.03   27.33
  13 -29   2   24.40   25.99
 -14 -28   2   29.64   21.98
 -13 -28   2    5.00   20.20
 -12 -28   2  -12.77   16.89
 -11 -28   2  113.32   24.29
 -10 -28   2    0.41   16.97
  -9 -28   2  228.18   31.54
  -8 -28   2   11.16   16.09
  -7 -28   2   51.57   18.49
  -6 -28   2    5.70   12.76
  -5 -28   2  114.63   21.56
  -4 -28   2   26.52   12.53
  -3 -28   2   -0.25    8.80
  -2 -28   2  162.23   19.26
  -1 -28   2    0.98   11.00
   0 -28   2   79.04   18.05
   1 -28   2   25.13   13.14
   1 -28   2   20.74   14.03
   2 -28   2  223.55   23.80
   2 -28   2  211.05   22.86
   3 -28   2   72.04   19.08
   3 -28   2   60.99   17.94
   4 -28   2  214.45   25.05
   4 -28   2  230.94   24.68
   5 -28   2   93.44   21.35
   5 -28   2  106.58   22.45
   6 -28   2   26.21   17.56
   6 -28   2   36.18   16.27
   7 -28   2   90.49   23.74
   7 -28   2  107.82   25.20
   8 -28   2   13.44   17.60
   9 -28   2   69.16   24.19
  10 -28   2   90.87   27.43
  11 -28   2   13.61   19.98
  12 -28   2   65.26   27.07
  13 -28   2   35.79   25.49
 -15 -27   2   53.26   26.56
 -14 -27   2    7.55   17.17
 -13 -27   2   63.66   20.74
 -12 -27   2  -21.43   13.66
 -11 -27   2   13.59   18.86
 -10 -27   2   11.03   16.93
  -9 -27   2   25.38   16.12
  -8 -27   2  -17.22   12.53
  -7 -27   2  -15.29   10.56
  -6 -27   2    4.47   12.97
  -5 -27   2   61.12   15.24
  -4 -27   2    8.53   12.26
  -3 -27   2   96.75   18.45
  -2 -27   2   19.35   12.23
  -1 -27   2  117.02   19.75
   0 -27   2   41.67   14.35
   0 -27   2   64.56   14.68
   1 -27   2  646.67   44.28
   1 -27   2  653.87   45.38
   2 -27   2    0.59   11.29
   2 -27   2   14.95   11.46
   3 -27   2   71.69   18.15
   3 -27   2   84.79   19.11
   4 -27   2   10.31   13.19
   4 -27   2    2.51   12.77
   5 -27   2  518.19   39.96
   5 -27   2  514.56   42.33
   6 -27   2   13.18   15.35
   6 -27   2   38.34   18.18
   7 -27   2   15.16   16.75
   7 -27   2    8.69   15.46
   8 -27   2   82.56   23.95
   9 -27   2   81.88   23.69
  10 -27   2   34.55   22.18
  11 -27   2    9.94   19.55
  12 -27   2   39.39   23.63
  13 -27   2  112.23   32.18
  14 -27   2   13.28   26.11
 -15 -26   2   -7.25   17.58
 -14 -26   2    8.11   16.83
 -13 -26   2   58.53   22.07
 -12 -26   2    0.96   15.09
 -11 -26   2   28.85   17.32
 -10 -26   2    4.16   14.24
  -9 -26   2   50.03   19.42
  -8 -26   2   58.42   17.87
  -7 -26   2  183.81   26.61
  -6 -26   2   69.48   18.08
  -5 -26   2  128.43   21.77
  -4 -26   2    2.62   11.12
  -3 -26   2  229.65   22.35
  -2 -26   2   26.13   12.24
  -1 -26   2  138.41   20.21
   0 -26   2  306.24   25.53
   0 -26   2  270.63   24.43
   1 -26   2   33.44   12.95
   1 -26   2   31.64   12.82
   2 -26   2    4.50   11.76
   2 -26   2    9.93   12.36
   3 -26   2  152.11   23.63
   3 -26   2  188.86   25.16
   4 -26   2   28.77   15.51
   4 -26   2   52.99   16.12
   5 -26   2  155.19   25.08
   5 -26   2  201.36   28.38
   6 -26   2   32.59   17.11
   6 -26   2   14.97   14.95
   7 -26   2  223.80   32.70
   7 -26   2  250.06   33.30
   8 -26   2   95.06   24.31
   9 -26   2  245.97   37.02
  10 -26   2   16.66   17.80
  11 -26   2  158.41   32.46
  12 -26   2    6.95   21.56
  13 -26   2   24.25   22.89
  14 -26   2   31.35   24.89
 -15 -25   2    2.94   19.75
 -14 -25   2    4.19   18.01
 -13 -25   2    6.65   17.51
 -12 -25   2   63.16   21.54
 -11 -25   2  151.48   26.71
 -10 -25   2  110.36   23.33
  -9 -25   2   -9.95   10.71
  -8 -25   2  117.28   22.06
  -7 -25   2   -0.23   11.69
  -6 -25   2  163.29   24.03
  -5 -25   2    9.47   11.72
  -4 -25   2   -7.64    7.73
  -3 -25   2  341.63   27.66
  -2 -25   2  131.10   15.29
  -1 -25   2    7.49    9.93
  -1 -25   2   15.66    9.18
   0 -25   2   48.49   13.56
   0 -25   2   58.28   13.19
   1 -25   2  339.54   27.90
   1 -25   2  362.18   29.23
   2 -25   2   58.92   15.78
   2 -25   2   29.71   12.84
   3 -25   2  371.41   31.61
   3 -25   2  367.86   30.53
   4 -25   2  208.33   22.08
   4 -25   2  193.50   22.88
   5 -25   2   19.41   14.72
   5 -25   2   24.89   14.49
   6 -25   2  110.34   23.33
   6 -25   2  121.57   23.42
   7 -25   2   74.98   20.61
   7 -25   2   43.40   18.22
   8 -25   2  299.66   32.67
   9 -25   2   84.44   23.86
  10 -25   2  259.20   32.57
  11 -25   2   95.76   26.96
  12 -25   2   14.81   19.82
  13 -25   2   50.72   26.23
  14 -25   2   -1.26   22.57
 -15 -24   2    2.67   19.01
 -14 -24   2   55.52   20.82
 -13 -24   2  -10.27   14.38
 -12 -24   2   10.99   15.12
 -11 -24   2    4.42   12.96
 -10 -24   2  151.19   25.73
  -9 -24   2  -10.76   12.88
  -8 -24   2   -3.41   12.34
  -7 -24   2   31.79   15.25
  -6 -24   2    6.75   11.53
  -5 -24   2   -5.00   10.39
  -4 -24   2   79.06   16.68
  -3 -24   2   43.28   11.84
  -2 -24   2  300.20   24.78
  -1 -24   2   90.79   16.53
  -1 -24   2  104.82   15.31
   0 -24   2  573.36   38.87
   0 -24   2  556.78   37.71
   1 -24   2   25.69   12.16
   1 -24   2   29.67   12.41
   2 -24   2  954.86   56.18
   2 -24   2  847.65   58.04
   3 -24   2  120.31   20.40
   3 -24   2  102.12   18.97
   4 -24   2  698.90   49.94
   4 -24   2  697.74   46.70
   5 -24   2   45.91   16.62
   5 -24   2   44.79   15.25
   6 -24   2   63.98   19.12
   6 -24   2   67.85   18.19
   7 -24   2    8.97   14.14
   7 -24   2    9.79   13.34
   8 -24   2   17.90   16.53
   9 -24   2   16.89   17.03
  10 -24   2   83.76   23.96
  11 -24   2   17.10   19.16
  12 -24   2   75.36   27.31
  13 -24   2    6.82   20.86
  14 -24   2   71.82   29.22
 -15 -23   2   -4.79   17.31
 -14 -23   2  -24.70   15.47
 -13 -23   2   19.61   18.43
 -12 -23   2   33.07   18.88
 -11 -23   2  -14.89   12.07
 -10 -23   2  173.45   26.72
  -9 -23   2   15.31   13.85
  -8 -23   2   54.65   16.79
  -7 -23   2   -3.01   11.11
  -6 -23   2  641.91   43.58
  -5 -23   2  -16.87    8.56
  -4 -23   2   96.28   17.18
  -3 -23   2   25.90   11.52
  -2 -23   2  335.47   26.84
  -2 -23   2  361.63   25.28
  -1 -23   2   95.74   16.10
  -1 -23   2   97.40   14.33
   0 -23   2   32.44   10.59
   0 -23   2   26.81   10.86
   1 -23   2  267.34   22.80
   1 -23   2  264.24   23.88
   2 -23   2  518.97   36.81
   2 -23   2  554.71   39.34
   3 -23   2  170.13   19.48
   3 -23   2  189.16   24.92
   4 -23   2   16.75   11.82
   4 -23   2    7.74   11.14
   5 -23   2  376.56   33.47
   5 -23   2  370.43   30.18
   6 -23   2  546.04   39.85
   6 -23   2  532.60   43.27
   7 -23   2   25.31   14.33
   7 -23   2   26.08   16.57
   8 -23   2  143.44   26.88
   9 -23   2   48.53   20.66
  10 -23   2  170.04   31.71
  11 -23   2   28.83   20.17
  12 -23   2  142.54   32.28
  13 -23   2    1.05   21.81
  14 -23   2   -4.81   21.39
  15 -23   2   47.05   29.36
 -15 -22   2   21.08   18.75
 -14 -22   2   28.51   19.81
 -13 -22   2   12.34   15.77
 -12 -22   2   17.61   17.08
 -11 -22   2    3.43   14.25
 -10 -22   2  209.82   28.83
  -9 -22   2  127.69   23.76
  -8 -22   2   42.87   16.30
  -7 -22   2  168.65   18.67
  -6 -22   2   13.96    9.29
  -5 -22   2  139.33   20.44
  -4 -22   2  402.48   30.08
  -3 -22   2  355.10   27.27
  -2 -22   2 1112.95   62.80
  -2 -22   2 1034.69   62.02
  -1 -22   2  301.71   24.15
  -1 -22   2  344.93   24.58
   0 -22   2   28.09   10.89
   0 -22   2   33.40   11.03
   1 -22   2  241.50   20.95
   1 -22   2  228.87   21.86
   2 -22   2  569.77   38.58
   2 -22   2  588.28   41.46
   3 -22   2   69.02   16.11
   4 -22   2   94.05   18.16
   4 -22   2   64.75   15.77
   5 -22   2  472.58   37.77
   5 -22   2  439.53   33.68
   6 -22   2  181.29   27.95
   6 -22   2  184.64   24.91
   7 -22   2  355.88   34.12
   7 -22   2  355.00   29.81
   8 -22   2  152.69   27.61
   9 -22   2  224.47   27.95
  10 -22   2    5.55   15.40
  11 -22   2   92.67   26.78
  12 -22   2   46.30   22.90
  13 -22   2   11.15   21.93
  14 -22   2  -14.95   20.55
  15 -22   2  -11.05   22.33
 -15 -21   2   39.01   21.03
 -14 -21   2   -5.02   15.78
 -13 -21   2  127.56   26.36
 -12 -21   2    9.95   15.15
 -11 -21   2  334.92   30.67
 -10 -21   2   75.59   19.20
  -9 -21   2  108.96   21.64
  -8 -21   2  -12.56   10.47
  -7 -21   2   31.51   13.53
  -6 -21   2   17.36   11.86
  -5 -21   2  205.54   19.83
  -4 -21   2   77.82   13.66
  -3 -21   2 1019.77   58.75
  -3 -21   2  975.31   56.95
  -2 -21   2  158.87   16.84
  -2 -21   2  166.49   15.33
  -1 -21   2  361.71   26.35
  -1 -21   2  380.36   27.20
   0 -21   2   21.00    9.59
   0 -21   2   50.07   11.37
   1 -21   2 1063.21   60.82
   1 -21   2 1049.35   64.69
   2 -21   2   66.61   15.12
   2 -21   2   96.92   16.09
   3 -21   2  990.88   63.40
   3 -21   2  997.87   59.23
   4 -21   2    2.49    9.11
   4 -21   2    4.95    9.34
   5 -21   2  206.28   20.73
   5 -21   2  175.06   22.11
   6 -21   2  127.13   20.91
   6 -21   2  125.54   22.98
   7 -21   2   29.29   15.46
   7 -21   2   23.31   13.33
   8 -21   2   91.74   22.69
   9 -21   2   81.71   23.17
  10 -21   2    3.35   15.61
  11 -21   2   64.40   23.06
  12 -21   2    3.67   18.53
  13 -21   2   88.36   28.36
  14 -21   2   -4.67   18.71
  15 -21   2  108.06   33.75
 -15 -20   2   33.21   19.58
 -14 -20   2  -15.69   14.80
 -13 -20   2   26.70   17.69
 -12 -20   2   -9.26   13.10
 -11 -20   2   28.45   15.52
 -10 -20   2  226.09   29.36
  -9 -20   2  509.90   38.03
  -8 -20   2   14.84   10.70
  -7 -20   2  601.09   41.15
  -6 -20   2   42.81   13.86
  -5 -20   2  256.70   22.42
  -4 -20   2    0.64    8.50
  -3 -20   2  947.75   55.19
  -3 -20   2  935.82   53.89
  -2 -20   2   86.86   15.12
  -2 -20   2  104.65   13.45
  -1 -20   2  275.59   21.90
  -1 -20   2  273.79   21.18
   0 -20   2  115.17   14.98
   0 -20   2   73.08   13.51
   1 -20   2  197.28   17.45
   1 -20   2  166.40   18.19
   2 -20   2  819.39   49.05
   2 -20   2  789.56   52.06
   3 -20   2   69.89   15.15
   3 -20   2   80.50   15.86
   4 -20   2  181.05   19.91
   4 -20   2  163.53   17.49
   5 -20   2  322.77   28.53
   5 -20   2  256.34   23.61
   6 -20   2    8.51   11.23
   6 -20   2   16.75   13.30
   7 -20   2   10.44   12.75
   7 -20   2   12.01   13.05
   8 -20   2    2.97   12.82
   8 -20   2    4.10   11.42
   9 -20   2  269.60   30.41
  10 -20   2   94.41   23.43
  11 -20   2   88.32   25.13
  12 -20   2   12.30   18.45
  13 -20   2   59.62   24.69
  14 -20   2  -29.40   17.95
  15 -20   2   31.69   23.73
 -15 -19   2   19.24   18.53
 -14 -19   2  -16.04   14.09
 -13 -19   2   52.26   18.82
 -12 -19   2    0.72   13.71
 -11 -19   2   57.84   17.44
 -10 -19   2  501.71   38.30
  -9 -19   2   -0.33   12.14
  -8 -19   2  176.05   24.26
  -7 -19   2    4.08   10.37
  -6 -19   2  824.30   51.07
  -5 -19   2  327.76   25.82
  -4 -19   2  208.12   19.06
  -3 -19   2  347.26   22.66
  -3 -19   2  344.32   25.79
  -2 -19   2   85.93   12.66
  -1 -19   2  284.43   22.74
  -1 -19   2  335.04   23.14
   0 -19   2   64.05   11.80
   0 -19   2   58.69   11.76
   1 -19   2  628.73   38.92
   1 -19   2  633.07   41.62
   2 -19   2  974.06   55.42
   2 -19   2  920.22   59.22
   3 -19   2   76.35   15.21
   3 -19   2   59.14   14.07
   4 -19   2    3.51    8.71
   4 -19   2   -1.06    8.19
   5 -19   2    3.34   10.48
   5 -19   2    7.97    9.00
   6 -19   2  338.90   27.54
   6 -19   2  358.41   31.75
   7 -19   2  -12.25   10.29
   7 -19   2    2.17    9.92
   8 -19   2  154.04   18.27
   8 -19   2  151.02   26.78
   9 -19   2  -11.26   13.77
  10 -19   2   61.40   20.82
  11 -19   2    4.79   16.75
  12 -19   2  263.94   33.11
  13 -19   2   85.06   27.50
  14 -19   2   -6.20   19.19
  15 -19   2    9.22   24.85
  16 -19   2   37.16   24.97
 -15 -18   2  122.16   26.63
 -14 -18   2  214.70   31.92
 -13 -18   2   -2.97   14.36
 -12 -18   2   62.72   19.47
 -11 -18   2   47.19   16.74
 -10 -18   2  371.61   31.53
  -9 -18   2    0.80   12.74
  -8 -18   2   16.91   12.45
  -7 -18   2  150.62   17.41
  -6 -18   2  162.43   17.64
  -5 -18   2   29.88   11.62
  -4 -18   2  636.99   40.21
  -4 -18   2  639.22   36.30
  -3 -18   2   15.73    8.76
  -3 -18   2   17.21    6.22
  -2 -18   2 1924.57  101.45
  -2 -18   2 1903.85  105.06
  -1 -18   2  269.28   21.24
  -1 -18   2  324.20   22.02
   0 -18   2  908.38   52.03
   0 -18   2  916.80   54.99
   1 -18   2  397.26   31.15
   1 -18   2  499.62   30.28
   2 -18   2 1106.02   68.53
   2 -18   2 1165.64   64.01
   3 -18   2   64.38   14.75
   3 -18   2  110.12   16.60
   4 -18   2  764.90   48.17
   4 -18   2  841.96   53.86
   5 -18   2   23.84   12.10
   5 -18   2   16.72    9.47
   6 -18   2    1.14    8.85
   6 -18   2   -1.31    9.55
   7 -18   2  -17.00    8.77
   7 -18   2    8.23   10.71
   8 -18   2   73.22   19.42
   8 -18   2  103.12   17.83
   9 -18   2   96.36   23.01
  10 -18   2   22.14   16.16
  11 -18   2   64.98   20.85
  12 -18   2   73.78   23.61
  13 -18   2    0.57   18.01
  14 -18   2   51.24   24.57
  15 -18   2    6.84   21.88
  16 -18   2  149.41   34.98
 -14 -17   2    4.00   16.00
 -13 -17   2   41.76   17.44
 -12 -17   2   -6.42   12.42
 -11 -17   2  201.77   27.72
 -10 -17   2  676.18   46.41
  -9 -17   2  -15.92   10.22
  -8 -17   2   17.04   11.97
  -7 -17   2  168.13   21.70
  -6 -17   2  245.89   21.65
  -5 -17   2  148.77   16.19
  -4 -17   2  149.10   15.50
  -4 -17   2  154.12   10.90
  -3 -17   2  463.82   28.95
  -3 -17   2  499.51   31.83
  -2 -17   2   67.55   12.54
  -2 -17   2   70.42   10.33
  -1 -17   2   66.92   12.41
  -1 -17   2   87.40   11.89
   0 -17   2   53.25   10.51
   0 -17   2   58.17   10.97
   1 -17   2  766.25   43.81
   1 -17   2  726.98   46.75
   2 -17   2  228.84   20.87
   2 -17   2  252.02   19.70
   3 -17   2  116.87   15.98
   3 -17   2  106.88   16.87
   4 -17   2  282.89   23.50
   4 -17   2  364.17   28.35
   5 -17   2  165.25   16.58
   5 -17   2  139.49   21.20
   6 -17   2  187.68   21.69
   6 -17   2  172.72   17.89
   7 -17   2    7.68   11.82
   7 -17   2   -7.94    8.74
   8 -17   2  469.47   33.35
   8 -17   2  469.25   39.64
   9 -17   2   15.64   15.19
  10 -17   2   59.22   20.56
  11 -17   2   11.21   15.73
  12 -17   2   58.14   22.30
  13 -17   2   26.68   18.69
  14 -17   2   29.42   22.07
  15 -17   2  -29.93   18.50
  16 -17   2   16.47   24.89
 -14 -16   2  155.91   28.06
 -13 -16   2   21.63   16.01
 -12 -16   2  -16.06   10.87
 -11 -16   2  -13.36   11.07
 -10 -16   2    2.22   12.06
  -9 -16   2  470.45   35.12
  -8 -16   2   -7.54    8.81
  -7 -16   2  575.55   38.53
  -6 -16   2  186.37   18.28
  -5 -16   2  471.03   32.14
  -4 -16   2   -5.23    3.50
  -4 -16   2   -7.73    6.67
  -3 -16   2 1876.76  101.93
  -3 -16   2 1893.08   99.71
  -2 -16   2    1.87    5.34
  -2 -16   2   23.46    7.60
  -1 -16   2   52.67    9.71
  -1 -16   2   62.62   10.55
   0 -16   2  527.12   35.02
   0 -16   2  569.96   33.64
   2 -16   2    9.61    8.66
   2 -16   2   14.15    7.87
   3 -16   2  252.98   19.61
   3 -16   2  240.69   22.00
   4 -16   2  316.76   23.22
   4 -16   2  308.29   26.48
   5 -16   2  550.66   39.95
   5 -16   2  516.46   34.31
   6 -16   2  154.99   16.74
  -6  16  -2  183.01   14.15
   6 -16   2  185.55   21.19
   7 -16   2   15.99    9.81
   7 -16   2   12.82   12.57
   8 -16   2   25.94   11.99
   8 -16   2   56.75   16.92
   9 -16   2  322.04   31.59
  10 -16   2   20.88   15.77
  11 -16   2   68.67   21.74
  12 -16   2   72.49   23.26
  13 -16   2   92.32   25.86
  14 -16   2   58.24   23.94
  15 -16   2    7.93   21.72
  16 -16   2    0.31   22.35
 -14 -15   2  106.32   23.81
 -13 -15   2  233.88   30.38
 -12 -15   2   -1.35   12.33
 -11 -15   2   92.20   19.23
 -10 -15   2   11.79   12.10
  -9 -15   2    6.32   11.17
  -8 -15   2   76.34   15.54
  -7 -15   2   63.27   14.02
  -6 -15   2  380.71   27.86
  -5 -15   2  453.95   30.58
  -4 -15   2  175.29   11.56
  -4 -15   2  168.87   16.17
  -3 -15   2   16.35    5.61
  -3 -15   2   15.27    8.10
  -2 -15   2    3.78    5.32
  -2 -15   2    5.98    5.87
  -1 -15   2 1208.32   66.43
  -1 -15   2 1130.57   63.41
   0 -15   2   45.99    9.20
   0 -15   2   44.28    8.12
   1 -15   2 4423.93  220.53
   1 -15   2 4402.26  237.65
   2 -15   2   21.23    7.91
   2 -15   2    2.05    6.98
   3 -15   2  138.93   18.06
   3 -15   2  131.20   13.22
   4 -15   2  342.12   28.89
   4 -15   2  402.79   26.39
   5 -15   2 1197.83   77.48
   5 -15   2 1336.15   70.37
   6 -15   2   24.34   12.74
  -6  15  -2   29.30    7.42
   6 -15   2   25.53   10.15
   7 -15   2   22.79   12.29
   7 -15   2   35.67   11.15
   8 -15   2   19.90   10.09
   8 -15   2   19.99   13.64
   9 -15   2   94.89   21.76
  10 -15   2   17.30   14.45
  11 -15   2   35.71   17.66
  12 -15   2  136.09   28.21
  13 -15   2  257.54   32.29
  14 -15   2  -20.10   14.48
  15 -15   2   51.01   25.60
  16 -15   2    0.71   23.05
 -14 -14   2  183.00   28.22
 -13 -14   2   61.24   18.93
 -12 -14   2   -6.97   11.02
 -11 -14   2  283.78   26.34
 -10 -14   2  187.13   24.72
  -9 -14   2  284.21   24.87
  -8 -14   2  256.84   22.30
  -7 -14   2   45.77   11.79
  -6 -14   2   90.38   15.19
  -5 -14   2  452.41   30.50
  -4 -14   2   45.05    9.92
  -4 -14   2   40.96    5.82
  -3 -14   2  942.19   52.79
  -3 -14   2  966.16   53.89
  -2 -14   2  992.19   55.85
  -2 -14   2 1036.42   56.95
  -1 -14   2   39.44    8.54
  -1 -14   2   34.72    7.38
   0 -14   2 1510.37   84.40
   0 -14   2 1495.71   78.92
   1 -14   2  527.59   29.44
   1 -14   2  410.66   30.68
   2 -14   2  707.99   44.78
   2 -14   2  708.84   40.90
   3 -14   2   50.78   10.53
   3 -14   2   80.20   13.44
   4 -14   2 1525.90   92.32
   4 -14   2 1627.60   84.17
   5 -14   2 1029.19   64.40
   5 -14   2  965.13   56.62
  -5  14  -2 1045.93   56.33
  -6  14  -2   16.21    6.52
   6 -14   2    7.56    9.94
   6 -14   2    7.99    7.42
   7 -14   2  405.13   28.65
   7 -14   2  426.73   34.86
  -7  14  -2  412.95   27.04
   8 -14   2   45.61   15.48
   9 -14   2  857.30   60.92
  10 -14   2   64.38   19.67
  11 -14   2   51.03   18.41
  12 -14   2  189.27   32.06
  13 -14   2   38.35   21.72
  14 -14   2   -3.01   19.18
  15 -14   2    8.96   20.69
  16 -14   2   68.08   29.31
 -14 -13   2   39.21   16.76
 -13 -13   2   50.12   18.13
 -12 -13   2   38.30   14.99
 -11 -13   2   42.93   14.65
 -10 -13   2  289.33   25.74
  -9 -13   2   -0.28    8.78
  -8 -13   2   84.33   15.36
  -7 -13   2  213.15   19.23
  -6 -13   2   96.08   14.94
  -5 -13   2  464.33   30.76
  -4 -13   2 2206.40  114.92
  -3 -13   2   45.09    5.66
  -3 -13   2   47.37    9.21
  -2 -13   2  509.61   29.93
  -2 -13   2  496.03   30.74
  -1 -13   2  327.91   21.47
  -1 -13   2  322.63   21.44
   0 -13   2 1843.40   98.93
   0 -13   2 1727.71   92.08
   1 -13   2  395.50   23.01
   1 -13   2  310.41   24.25
   2 -13   2   38.35    8.44
   2 -13   2   36.78    9.33
   3 -13   2  354.43   23.92
   3 -13   2  383.60   27.72
  -4  13  -2  857.49   50.07
   4 -13   2  880.30   50.68
   4 -13   2  980.48   57.85
   5 -13   2  121.59   14.98
  -5  13  -2   90.13   10.32
   5 -13   2  100.25   16.92
   6 -13   2  392.31   33.11
   6 -13   2  413.12   27.89
  -6  13  -2  462.21   27.26
   7 -13   2   74.58   15.17
   7 -13   2   83.04   14.23
  -7  13  -2   83.58   10.17
  -8  13  -2 1049.22   62.91
   8 -13   2 1157.56   72.78
  10 -13   2  253.73   28.43
  11 -13   2   11.43   14.02
  12 -13   2  126.88   25.78
  13 -13   2    4.53   16.35
  14 -13   2    4.69   19.64
  15 -13   2   76.75   26.52
  16 -13   2  -21.93   21.28
  17 -13   2    1.24   23.39
 -18 -12   2   53.89   26.39
 -14 -12   2  218.98   24.99
 -13 -12   2   40.46   17.67
 -12 -12   2    7.61   12.33
 -11 -12   2  433.98   33.74
 -10 -12   2   29.01   13.45
  -9 -12   2   20.18   11.62
  -8 -12   2   21.29   10.42
  -7 -12   2   86.48   14.64
  -7 -12   2   69.90    7.83
  -6 -12   2  149.40   10.92
  -6 -12   2  165.39   15.19
  -5 -12   2   -0.28    6.10
  -4 -12   2  423.99   27.86
  -3 -12   2   38.92    4.88
  -3 -12   2   42.40    9.02
  -2 -12   2 1374.46   72.48
  -2 -12   2 1356.82   74.56
  -1 -12   2  148.60   12.54
  -1 -12   2  158.42   12.27
   0 -12   2  217.26   17.02
   0 -12   2  252.33   16.61
   1 -12   2 1376.31   81.26
   1 -12   2 1508.25   75.23
   2 -12   2  462.59   31.42
   2 -12   2  477.49   28.48
   3 -12   2   30.58    9.52
   3 -12   2   50.48    9.14
   4 -12   2 1145.14   60.30
  -4  12  -2 1126.92   60.53
   4 -12   2 1053.47   66.96
   5 -12   2   50.48   10.39
  -5  12  -2   39.60    8.18
   5 -12   2   62.76   13.96
   6 -12   2  308.95   21.44
  -6  12  -2  300.34   20.41
   6 -12   2  258.70   25.25
   7 -12   2    3.07    7.40
  -7  12  -2    1.66    6.03
   7 -12   2   -7.32    9.26
  -8  12  -2   39.81   10.08
  -9  12  -2   80.72   13.55
   9 -12   2   56.74   18.15
  10 -12   2   79.33   19.56
  11 -12   2   -0.20   13.02
  12 -12   2  232.18   29.57
  13 -12   2   19.16   17.79
  14 -12   2  136.60   32.00
  15 -12   2    3.56   19.22
  16 -12   2   88.95   30.91
  17 -12   2   75.13   29.56
 -18 -11   2   28.00   23.59
 -14 -11   2   61.02   18.94
 -13 -11   2  150.70   24.81
 -12 -11   2  281.19   26.31
 -11 -11   2   27.86   13.66
 -10 -11   2  137.40   21.05
  -9 -11   2   -1.77    7.86
  -8 -11   2  347.54   26.14
  -8 -11   2  329.44   22.41
  -7 -11   2   37.47    7.53
  -7 -11   2   45.80   11.48
  -6 -11   2  415.01   24.69
  -6 -11   2  417.96   28.50
  -5 -11   2   16.16    8.06
  -5 -11   2   23.63    4.44
  -4 -11   2  760.31   43.79
  -3 -11   2   69.59   10.56
  -3 -11   2   81.52    6.62
  -2 -11   2   27.21    5.22
  -2 -11   2   14.63    6.09
  -1 -11   2   12.70    5.21
  -1 -11   2   18.16    4.86
   0 -11   2  112.90   10.58
   0 -11   2  109.37    9.80
   1 -11   2  826.76   49.75
   1 -11   2  860.76   45.55
   2 -11   2   78.91    8.17
   2 -11   2   67.15   10.97
   3 -11   2   43.26   10.52
   3 -11   2   67.78    7.75
   4 -11   2  345.69   26.53
   4 -11   2  343.23   22.14
  -4  11  -2  326.05   21.28
   5 -11   2 1408.35   72.36
  -5  11  -2 1401.71   74.11
   5 -11   2 1261.99   80.53
   6 -11   2  462.90   35.12
  -6  11  -2  456.65   29.09
   6 -11   2  465.42   29.22
  -7  11  -2   41.89    9.31
   7 -11   2   25.09   11.83
   8 -11   2  366.47   31.73
  -8  11  -2  349.08   25.43
  -9  11  -2   29.93   10.61
   9 -11   2   47.95   16.38
  10 -11   2  296.30   29.98
  11 -11   2   -2.95   13.25
  12 -11   2   84.90   23.47
  13 -11   2  360.12   37.21
  14 -11   2   47.11   22.66
  15 -11   2    0.80   18.64
  16 -11   2    9.55   23.03
  17 -11   2   -7.42   21.67
 -18 -10   2  -11.37   18.15
 -14 -10   2   12.59   14.52
 -13 -10   2  182.48   26.21
 -12 -10   2  247.14   24.30
 -11 -10   2   -9.54   10.34
 -10 -10   2   51.45   14.03
  -9 -10   2  197.71   19.02
  -8 -10   2  321.51   22.54
  -8 -10   2  336.48   25.35
  -7 -10   2  397.25   27.21
  -7 -10   2  348.94   23.64
  -6 -10   2    5.90    6.96
  -6 -10   2    2.81    4.03
  -5 -10   2  698.62   39.21
  -5 -10   2  705.48   41.53
  -4 -10   2  638.70   37.54
  -4 -10   2  634.55   35.37
  -3 -10   2  433.36   24.65
  -3 -10   2  424.41   26.68
  -2 -10   2   52.05    8.58
  -2 -10   2   51.93    5.49
  -1 -10   2  335.44   21.18
  -1 -10   2  347.37   21.40
   0 -10   2 1161.90   65.63
   0 -10   2 1181.38   61.21
   1 -10   2  719.18   38.25
   1 -10   2  685.36   42.08
   2 -10   2    2.05    3.92
   2 -10   2    3.43    5.02
  -3  10  -2  107.72    9.40
   3 -10   2  124.26   10.67
   3 -10   2  123.54   12.47
   4 -10   2    0.88    4.76
  -4  10  -2   10.43    4.81
   4 -10   2    0.47    6.30
  -5  10  -2 1214.80   67.36
   5 -10   2 1191.85   65.18
   5 -10   2 1272.36   74.26
  -6  10  -2  115.02   11.95
   6 -10   2  149.58   17.02
   6 -10   2  104.99   11.77
   7 -10   2  611.43   44.29
  -7  10  -2  635.50   38.60
   8 -10   2   12.66   11.19
  -8  10  -2    0.49    6.72
  -9  10  -2  611.60   39.42
   9 -10   2  582.76   45.08
  10 -10   2   22.61   14.52
 -10  10  -2  -10.63    9.19
  11 -10   2  273.09   29.36
  12 -10   2   28.81   16.87
  13 -10   2   13.36   16.66
  14 -10   2    2.24   17.36
  15 -10   2  -16.97   17.96
  16 -10   2    2.76   18.94
  17 -10   2   27.12   28.19
 -18  -9   2    9.91   19.87
 -14  -9   2    7.87   13.45
 -13  -9   2  192.53   21.69
 -12  -9   2  152.95   23.68
 -11  -9   2  507.16   36.91
 -10  -9   2   -5.49    9.15
  -9  -9   2   55.24   10.96
  -9  -9   2   37.39   11.77
  -8  -9   2  269.69   22.87
  -8  -9   2  316.26   21.42
  -7  -9   2  117.80   13.28
  -7  -9   2  100.62   10.46
  -6  -9   2   58.64    7.31
  -6  -9   2   84.22   12.74
  -5  -9   2  235.15   15.82
  -5  -9   2  262.24   19.05
  -4  -9   2   28.21    4.30
  -4  -9   2   19.00    6.66
  -3  -9   2 1236.72   67.13
  -3  -9   2 1299.28   68.48
  -2  -9   2   -2.67    3.48
  -2  -9   2    8.72    3.55
  -1  -9   2 1487.91   81.16
  -1  -9   2 1493.23   76.83
   0  -9   2 2811.70  150.05
   0  -9   2 2772.48  139.39
   1  -9   2  859.72   44.01
   1  -9   2  798.20   48.25
   2  -9   2   -1.53    3.48
   2  -9   2    0.13    4.64
   3  -9   2 1429.21   80.98
  -3   9  -2 1406.86   75.27
   3  -9   2 1394.65   72.80
  -4   9  -2  289.05   18.89
   4  -9   2  280.42   18.57
   4  -9   2  293.73   22.92
   5  -9   2    1.46    5.49
  -5   9  -2    9.40    5.80
   6  -9   2   82.44   15.71
  -6   9  -2   61.09   10.45
   7  -9   2   30.36   12.53
  -7   9  -2   64.47   10.84
  -8   9  -2  269.03   21.45
   8  -9   2  262.46   25.75
  -9   9  -2   68.89   13.80
   9  -9   2   62.10   15.94
  10  -9   2    7.61   12.36
 -10   9  -2   -0.38    8.80
 -11   9  -2    1.47   10.12
  11  -9   2   37.52   16.29
  12  -9   2    6.12   15.85
  13  -9   2   56.32   20.35
  14  -9   2   46.46   20.99
  15  -9   2  118.02   29.23
  16  -9   2   37.68   23.17
 -18  -8   2  -16.18   17.55
 -17  -8   2   24.25   19.58
 -14  -8   2    8.25   12.83
 -13  -8   2   87.50   20.05
 -12  -8   2  133.44   21.98
 -11  -8   2 1030.13   62.62
 -10  -8   2  162.93   22.28
  -9  -8   2  376.47   28.18
  -8  -8   2   39.16    9.18
  -8  -8   2   29.87   10.81
  -7  -8   2 1600.97   86.80
  -7  -8   2 1614.19   89.09
  -6  -8   2   -2.55    4.11
  -6  -8   2    9.36    6.80
  -5  -8   2  677.00   38.19
  -5  -8   2  661.03   39.26
  -4  -8   2   11.62    5.43
  -4  -8   2    9.77    3.27
  -3  -8   2  680.04   39.43
  -3  -8   2  731.23   39.08
  -2  -8   2  620.81   34.80
  -2  -8   2  621.34   34.81
  -1  -8   2 1132.05   62.42
  -1  -8   2 1144.76   59.39
   0  -8   2  218.79   15.15
   0  -8   2  208.24   13.80
   1  -8   2  141.59    9.36
   1  -8   2  102.52   10.40
  -2   8  -2  540.09   29.04
   2  -8   2  461.47   31.83
   2  -8   2  522.73   28.42
   3  -8   2  320.39   22.03
  -3   8  -2  264.35   17.85
   3  -8   2  269.18   17.47
  -4   8  -2  396.15   24.23
   4  -8   2  379.18   27.94
   4  -8   2  395.63   23.26
  -5   8  -2   22.26    6.70
   5  -8   2    3.91    7.62
   5  -8   2   20.84    6.73
  -6   8  -2  396.72   24.45
   6  -8   2  288.12   26.61
   7  -8   2  385.28   31.15
  -7   8  -2  390.80   27.05
  -8   8  -2   74.67   12.68
   8  -8   2   42.67   13.80
   9  -8   2   -3.92    9.33
  -9   8  -2   -0.61    7.72
  10  -8   2   10.06   12.38
 -10   8  -2    1.94   10.14
 -11   8  -2  292.46   26.35
  11  -8   2  293.28   29.95
  12  -8   2   90.85   24.19
  13  -8   2   49.82   19.45
  15  -8   2   41.38   23.12
  16  -8   2   60.53   25.49
 -18  -7   2  -29.67   17.45
 -17  -7   2   39.61   22.12
 -14  -7   2   12.67   13.80
 -13  -7   2    7.00   12.43
 -12  -7   2  112.62   20.60
 -11  -7   2  149.59   22.25
  10   7  -2  185.60   18.48
 -10  -7   2  194.05   19.41
   9   7  -2  107.27   13.09
  -9  -7   2  116.80   17.28
   8   7  -2  341.83   25.06
  -8  -7   2  379.42   26.95
  -7  -7   2  324.76   23.94
  -6  -7   2  668.44   39.29
  -6  -7   2  664.40   39.74
  -5  -7   2  536.23   31.51
  -5  -7   2  538.24   32.62
  -4  -7   2   27.31    6.64
  -4  -7   2   33.00    4.91
  -3  -7   2  853.07   46.46
  -3  -7   2  851.77   46.72
  -2  -7   2   83.48    6.92
  -2  -7   2   93.32    8.58
  -1  -7   2 1696.62   90.65
  -1  -7   2 1667.00   85.34
   0  -7   2   65.19    6.36
   0  -7   2   67.96    7.35
   1  -7   2   -3.82    3.22
  -2   7  -2   49.36    6.08
   2  -7   2   45.39    7.55
   2  -7   2   46.19    6.30
   3  -7   2  560.88   36.74
   3  -7   2  599.50   31.76
  -3   7  -2  588.45   33.38
  -4   7  -2  189.54   14.05
   4  -7   2  182.78   16.72
   4  -7   2  190.82   13.07
   5  -7   2  697.41   46.70
  -5   7  -2  770.84   42.95
  -6   7  -2 1390.29   76.05
   6  -7   2 1342.59   81.33
  -7   7  -2    4.37    7.06
   7  -7   2   -0.18    8.73
  -8   7  -2  148.95   15.44
   8  -7   2  154.71   18.66
  -9   7  -2   -1.16    7.92
   9  -7   2   -8.67    8.56
  10  -7   2  133.24   22.95
 -10   7  -2  169.95   18.30
 -11   7  -2   15.27   11.84
  11  -7   2   18.13   14.00
 -12   7  -2  202.42   25.68
  12  -7   2  164.68   27.73
  13  -7   2   13.70   15.89
  14  -7   2   20.91   18.54
  15  -7   2   -4.69   16.98
  16  -7   2   43.34   25.09
 -18  -6   2   39.15   23.83
 -17  -6   2   20.76   20.11
 -14  -6   2   75.36   19.91
 -13  -6   2   62.74   17.36
 -12  -6   2  453.37   34.52
 -11  -6   2  489.81   36.07
  11   6  -2  482.80   36.26
  10   6  -2   48.19   12.82
 -10  -6   2   41.49   12.54
   9   6  -2  222.92   19.54
  -9  -6   2  240.75   20.62
   8   6  -2  125.45   15.94
  -8  -6   2  133.19   17.76
  -7  -6   2    5.48    6.66
   7   6  -2   -6.63    5.69
  -6  -6   2  147.61   13.71
  -5  -6   2    4.09    4.04
  -5  -6   2    1.57    4.60
  -4  -6   2  649.94   36.97
  -4  -6   2  646.56   36.75
  -3  -6   2  195.54   14.34
  -3  -6   2  209.55   12.98
  -2  -6   2  623.58   34.31
  -2  -6   2  621.04   34.68
  -1  -6   2   45.53    6.44
  -1  -6   2   44.62    5.18
   0  -6   2 1355.77   75.18
   0  -6   2 1400.84   69.68
   1  -6   2 1076.57   53.90
   1  -6   2 1047.22   59.56
   2  -6   2   14.77    5.68
   2  -6   2   11.11    3.75
  -2   6  -2    9.17    3.76
  -3   6  -2   44.00    6.41
   3  -6   2   37.84    5.61
   3  -6   2   30.69    7.64
   4  -6   2   58.86    6.31
   4  -6   2   55.72    9.63
  -4   6  -2   65.79    7.62
  -5   6  -2  670.83   38.19
   5  -6   2  602.22   41.15
  -6   6  -2   96.75   13.11
   6  -6   2  122.75   14.64
   7  -6   2   49.97   13.67
  -7   6  -2   36.42   10.09
   8  -6   2   12.05   11.05
  -8   6  -2   34.30   10.62
  -9   6  -2   61.60   14.02
   9  -6   2   64.33   15.98
  10  -6   2   47.94   15.16
 -10   6  -2   13.84   10.42
 -11   6  -2    4.45   11.46
  11  -6   2   15.74   13.95
 -12   6  -2   -8.65   10.52
  12  -6   2   -1.99   13.28
 -13   6  -2   12.45   13.38
  13  -6   2    8.76   16.24
  14  -6   2   46.82   21.17
  15  -6   2  -16.40   16.92
 -18  -5   2   24.21   22.29
 -17  -5   2   47.73   23.39
 -14  -5   2  111.12   21.34
 -13  -5   2   46.43   15.91
 -12  -5   2  248.65   24.48
  11   5  -2  705.11   47.35
 -11  -5   2  682.62   45.46
 -10  -5   2  262.54   22.52
  10   5  -2  220.59   21.26
  -9  -5   2    0.55    7.94
   9   5  -2   -6.69    6.58
  -8  -5   2 2536.29  131.97
   8   5  -2 2528.72  139.57
   7   5  -2   93.40   12.50
  -7  -5   2   85.85   13.42
   6   5  -2   64.75    7.92
  -6  -5   2   45.21    9.80
  -5  -5   2  240.16   17.50
  -5  -5   2  249.06   16.85
  -4  -5   2  508.18   29.04
  -4  -5   2  479.50   29.04
  -3  -5   2  982.17   53.32
  -3  -5   2  964.45   51.72
  -2  -5   2 1197.56   64.40
  -2  -5   2 1186.08   61.57
  -1  -5   2  270.65   16.11
  -1  -5   2  275.09   16.60
   0  -5   2  856.41   43.85
   0  -5   2  851.53   47.61
   1  -5   2 2751.89  147.32
  -1   5  -2 2697.81  142.36
   1  -5   2 2789.51  135.43
   2  -5   2  115.40   10.13
  -2   5  -2   95.41    8.28
   2  -5   2   83.57    6.81
  -3   5  -2 2054.67  107.58
   3  -5   2 2013.50  112.20
   3  -5   2 2042.31  101.53
   4  -5   2  618.82   38.29
  -4   5  -2  579.56   35.12
   5  -5   2   95.27   11.92
  -6   5  -2  133.31   13.17
   6  -5   2  116.04   14.59
  -7   5  -2  603.11   37.02
   7  -5   2  505.96   38.60
   8  -5   2   -3.80    8.27
  -8   5  -2   -0.08    8.17
  -9   5  -2    7.06    8.93
   9  -5   2    0.61    9.03
  10  -5   2  205.09   23.36
 -10   5  -2  237.08   22.96
 -11   5  -2    7.17   11.76
  11  -5   2   21.32   13.96
  12  -5   2   15.23   14.64
 -12   5  -2   33.62   14.83
 -13   5  -2    1.09   12.36
  13  -5   2   -5.33   13.29
  14  -5   2  163.24   31.00
  15  -5   2   28.31   21.76
 -18  -4   2   27.54   22.97
 -17  -4   2   12.69   17.71
 -16  -4   2   41.31   20.54
 -13  -4   2   32.33   14.44
  12   4  -2   32.74   14.40
 -12  -4   2   31.20   14.25
  11   4  -2  678.92   47.93
 -11  -4   2  731.29   46.27
  10   4  -2  491.38   35.33
 -10  -4   2  492.19   34.10
   9   4  -2  298.66   24.28
   8   4  -2    5.11    8.23
   7   4  -2 1700.28   95.35
   6   4  -2   73.15    8.76
   5   4  -2  687.77   40.17
  -4  -4   2  381.99   23.33
  -3  -4   2   84.35    7.06
  -3  -4   2   73.05    7.85
  -2  -4   2   43.81    4.49
  -2  -4   2   45.44    5.03
  -1  -4   2  297.91   17.87
  -1  -4   2  305.92   17.27
   0  -4   2  674.40   38.12
   0  -4   2  682.36   34.95
   1  -4   2   66.70    6.85
  -1   4  -2   68.27    5.97
   2  -4   2   24.92    6.27
  -2   4  -2   25.90    5.36
   3  -4   2 2407.68  118.75
   3  -4   2 2516.38  130.89
  -3   4  -2 2256.66  125.66
   4  -4   2  149.53   13.73
  -4   4  -2  144.33   12.04
  -5   4  -2   11.91    6.02
   5  -4   2   -1.84    4.76
   6  -4   2  531.18   35.09
  -6   4  -2  454.66   31.79
   7  -4   2  983.83   61.10
  -7   4  -2  960.61   58.09
  -8   4  -2  407.90   30.72
   8  -4   2  442.06   33.26
  -9   4  -2   22.46   10.03
   9  -4   2   12.87   11.58
 -10   4  -2    5.93    9.77
  10  -4   2    8.22   10.71
  11  -4   2  171.41   26.94
 -11   4  -2  180.72   21.54
 -12   4  -2   13.17   14.54
  12  -4   2    8.87   14.72
  13  -4   2   82.63   22.49
 -13   4  -2  132.04   25.13
 -14   4  -2   23.48   17.15
  14  -4   2   42.50   19.17
 -17  -3   2   93.48   25.66
 -16  -3   2   15.64   20.85
 -13  -3   2  175.58   24.36
 -12  -3   2  -23.96    9.03
  12   3  -2   -1.30   11.32
  11   3  -2   41.12   13.67
  10   3  -2   27.81   11.75
   9   3  -2   53.33   12.91
   8   3  -2  114.01   14.16
   7   3  -2  166.12   15.55
   6   3  -2  104.87   10.84
   5   3  -2   66.48    7.60
  -3  -3   2  153.55   10.97
  -2  -3   2    0.39    2.22
  -1  -3   2 1827.47   91.13
  -1   3  -2   31.15    4.16
   1  -3   2   37.36    5.70
   2  -3   2 5166.32  272.43
  -2   3  -2 5108.15  264.81
  -3   3  -2 1044.38   55.00
   3  -3   2  945.39   57.04
  -4   3  -2   99.50    9.92
   4  -3   2  101.20   10.84
   5  -3   2    0.97    5.50
  -5   3  -2    7.15    5.78
  -6   3  -2   75.04   12.37
   6  -3   2   43.08   11.41
  -7   3  -2  112.38   16.11
   7  -3   2  106.36   16.36
  -8   3  -2  175.22   17.72
   8  -3   2  127.22   16.60
   9  -3   2   50.67   14.99
  -9   3  -2   28.81   11.76
  10  -3   2   -3.21    9.06
 -10   3  -2   -1.36    9.52
  11  -3   2  167.64   21.70
 -11   3  -2  204.32   26.15
 -12   3  -2   39.64   15.90
  12  -3   2   61.03   18.59
  13  -3   2    0.27   14.08
 -13   3  -2   -2.52   13.02
  14  -3   2  -16.17   16.00
 -14   3  -2    5.73   16.69
 -17  -2   2   -7.75   17.25
 -16  -2   2   18.08   17.19
 -13  -2   2  100.91   20.70
  13   2  -2   89.93   20.13
  12   2  -2   58.60   17.87
  11   2  -2  895.01   59.08
  10   2  -2   30.56   12.52
   9   2  -2  405.85   30.58
   8   2  -2   97.32   15.58
   7   2  -2  124.89   13.18
   6   2  -2   17.23    6.64
   5   2  -2  490.73   30.67
   4   2  -2    4.85    4.17
  -3  -2   2   47.72    6.33
  -2  -2   2   21.66    3.88
   0   2  -2  262.24   14.98
   0  -2   2  251.09   15.54
  -1   2  -2  176.70   11.14
   1  -2   2  158.44   11.46
  -2   2  -2   41.97    6.07
   2  -2   2   23.24    5.64
  -3   2  -2  939.35   54.49
   3  -2   2 1032.06   56.66
  -4   2  -2    8.84    5.27
   4  -2   2   20.24    6.34
   5  -2   2  176.57   16.02
  -5   2  -2  198.17   15.92
   6  -2   2   64.27   13.00
  -6   2  -2   46.81   11.34
   7  -2   2  950.12   60.97
  -7   2  -2 1030.69   60.00
  -8   2  -2  153.72   17.49
   8  -2   2  163.85   21.45
  -9   2  -2  276.33   24.63
   9  -2   2  272.71   25.10
  10  -2   2   23.37   12.35
 -10   2  -2   20.54   12.09
 -11   2  -2  105.42   19.74
  11  -2   2   51.38   16.49
 -12   2  -2    1.99   11.74
  12  -2   2   -0.04   11.86
  13  -2   2   20.90   15.93
 -13   2  -2   55.59   18.92
 -14   2  -2    2.65   15.83
  14  -2   2   -1.64   15.87
 -15   2  -2  -17.65   15.08
 -16  -1   2   -1.91   15.14
 -15  -1   2   67.01   21.91
  13   1  -2   10.30   13.95
  12   1  -2   35.64   15.70
  11   1  -2  360.68   30.66
  10   1  -2  182.93   19.54
   9   1  -2   23.99   10.10
   8   1  -2  558.72   37.92
   7   1  -2  112.18   12.72
   6   1  -2   -0.71    4.76
   5   1  -2  425.29   27.50
   4   1  -2   53.41    8.15
   3   1  -2  311.40   19.48
  -2  -1   2  177.12   11.73
   0  -1   2  277.53   16.58
   1  -1   2   11.53    3.24
  -1   1  -2   19.30    3.60
   2  -1   2   18.22    4.81
  -2   1  -2   19.72    4.03
  -3   1  -2 1704.37   92.87
   3  -1   2 1764.97   95.26
  -4   1  -2 1279.66   73.56
   4  -1   2 1392.69   75.66
   5  -1   2  513.91   33.81
  -5   1  -2  533.27   33.56
  -6   1  -2  155.56   17.14
   6  -1   2  223.43   18.84
   7  -1   2   46.38   11.42
  -7   1  -2   29.64   10.95
   8  -1   2  236.76   21.61
  -8   1  -2  231.13   21.79
   9  -1   2   23.33   10.64
  -9   1  -2   11.67    9.23
 -10   1  -2  341.72   28.82
  10  -1   2  257.25   26.51
 -11   1  -2  273.70   27.10
  11  -1   2  266.14   27.52
  12  -1   2    2.56   12.71
 -12   1  -2   -4.95   11.89
  13  -1   2   12.19   15.38
 -13   1  -2   -8.17   12.64
 -14   1  -2  154.52   28.76
 -15   1  -2   -7.08   17.61
 -16   1  -2  -22.67   14.40
 -16   0   2  168.83   29.27
 -15   0   2   15.36   16.34
  14   0  -2  224.50   32.95
  13   0  -2    4.77   13.66
  12   0  -2  192.01   26.63
  11   0  -2   19.49   12.68
  10   0  -2  627.54   44.23
   9   0  -2   -9.21    7.29
   8   0  -2   64.76   12.89
   7   0  -2   -6.85    5.68
   6   0  -2   70.55   11.15
   5   0  -2    5.21    5.23
   4   0  -2 1105.92   62.40
   3   0  -2    0.11    3.42
  -2   0   2  899.10   49.78
   1   0   2   -1.30    1.81
  -1   0  -2    4.27    2.32
  -2   0  -2  125.55   10.13
   2   0   2  125.71    9.99
  -3   0  -2    3.89    5.29
  -4   0  -2 1328.63   70.48
   4   0   2 1193.48   70.91
  -5   0  -2   -2.51    5.03
   5   0   2   -1.98    5.22
  -6   0  -2 3527.76  187.85
   6   0   2 3519.30  191.68
   7   0   2   -1.03    7.53
  -7   0  -2  -13.03    6.58
  -8   0  -2  255.94   18.26
   8   0   2  260.88   22.34
  -8   0  -2  220.65   22.10
  -9   0  -2    4.00    6.23
   9   0   2   -2.02    8.79
  -9   0  -2   -0.60    8.94
  10   0   2  102.55   17.63
 -10   0  -2   38.35   14.71
 -11   0  -2    6.80   12.23
  11   0   2   13.47   12.67
  12   0   2  182.81   27.89
 -12   0  -2  215.76   28.63
  13   0   2    2.58   14.14
 -13   0  -2   -0.69   13.80
 -14   0  -2  249.98   35.43
 -15   0  -2  -14.57   14.92
 -16   0  -2    1.81   17.69
 -15   1   2  120.86   25.21
  14  -1  -2   86.95   22.86
  13  -1  -2   13.91   15.36
  12  -1  -2   12.83   13.29
  11  -1  -2  387.21   33.06
  10  -1  -2  176.66   23.47
   9  -1  -2   28.75   11.43
   8  -1  -2  584.37   39.87
   7  -1  -2  114.24   13.94
   6  -1  -2    0.96    5.45
   5  -1  -2  414.40   27.47
   4  -1  -2   54.98    8.54
   3  -1  -2  326.17   20.95
  -2   1   2  200.33   13.26
  -1   1   2  882.45   49.35
   1  -1  -2  917.54   46.11
  -1  -1  -2   32.67    4.53
   1   1   2   15.48    3.45
  -2  -1  -2   17.00    4.88
   2   1   2   15.70    4.05
  -3  -1  -2 1831.00   89.55
   3   1   2 1812.10   97.86
  -3  -1  -2 1752.33   96.48
  -4  -1  -2 1217.77   71.93
  -4  -1  -2 1345.53   66.03
   4   1   2 1331.64   72.93
  -5  -1  -2  554.24   34.29
   5   1   2  500.40   33.21
  -5  -1  -2  517.02   29.09
  -6  -1  -2  157.48   17.78
  -6  -1  -2  183.71   14.40
   6   1   2  265.29   19.06
  -7  -1  -2   37.82   11.80
  -7  -1  -2   20.39    7.92
  -8  -1  -2  223.79   17.65
   8   1   2  233.10   21.46
  -8  -1  -2  267.00   23.12
  -9  -1  -2   13.12   10.04
  -9  -1  -2   20.20    8.35
   9   1   2   16.33   10.03
  10   1   2  312.44   27.99
 -10  -1  -2  312.83   23.24
 -10  -1  -2  333.53   29.39
 -11  -1  -2  262.49   27.31
  11   1   2  260.22   25.91
 -12  -1  -2   16.27   13.16
  12   1   2   13.33   12.93
 -13  -1  -2   -9.59   12.71
 -14  -1  -2  144.80   28.05
 -15  -1  -2   -2.87   15.07
 -16  -1  -2  -13.23   16.20
  15  -2  -2  228.69   34.89
  14  -2  -2   20.95   17.94
 -14   2   2   22.75   16.54
  13  -2  -2   95.85   22.95
  12  -2  -2   70.41   18.70
  11  -2  -2  949.79   63.34
  10  -2  -2   73.82   16.65
   9  -2  -2  390.37   30.83
   8  -2  -2  117.48   18.53
   7  -2  -2  154.85   16.02
   6  -2  -2   16.93    7.19
   5  -2  -2  490.72   31.83
   4  -2  -2   11.08    5.23
   3  -2  -2   33.05    6.49
   2  -2  -2   21.19    4.52
   2  -2  -2   17.16    4.17
  -1   2   2  120.46    7.80
   1  -2  -2   82.80    6.80
  -1  -2  -2  189.91   12.48
   2   2   2   19.31    4.47
  -2  -2  -2   27.07    5.67
   3   2   2 1030.74   57.65
  -3  -2  -2 1066.08   52.79
  -3  -2  -2 1004.27   57.82
  -4  -2  -2    6.84    5.83
   4   2   2   35.12    6.48
  -4  -2  -2   18.79    4.60
   5   2   2  204.01   16.01
  -5  -2  -2  208.16   13.54
  -5  -2  -2  176.46   16.72
  -6  -2  -2   89.46   10.73
   6   2   2   72.39   12.32
  -6  -2  -2   45.76   12.66
  -7  -2  -2 1041.84   62.87
   7   2   2 1059.87   62.16
  -7  -2  -2  990.08   55.56
   8   2   2  151.58   16.38
  -8  -2  -2  131.77   12.91
  -8  -2  -2  141.41   17.57
  -9  -2  -2  258.16   19.57
  -9  -2  -2  274.23   25.10
   9   2   2  252.98   22.92
  10   2   2   51.87   14.02
 -10  -2  -2   63.73   12.28
 -10  -2  -2   24.92   13.21
  11   2   2   60.21   16.85
 -11  -2  -2  118.53   21.96
  12   2   2    0.82   10.87
 -12  -2  -2   -5.86   12.87
 -13  -2  -2   34.97   18.33
 -14  -2  -2   18.06   17.10
 -15  -2  -2   -9.17   16.01
 -16  -2  -2   41.86   21.91
 -17  -2  -2  -24.22   18.48
  15  -3  -2  173.50   32.06
 -14   3   2   75.00   19.40
  14  -3  -2   79.71   23.37
  13  -3  -2  143.07   25.91
  12  -3  -2   -8.64   10.75
  11  -3  -2   57.33   15.91
  10  -3  -2   49.19   14.83
   9  -3  -2   61.37   14.25
   8  -3  -2  137.18   20.47
   7  -3  -2  194.25   18.59
   6  -3  -2  121.24   13.24
   5  -3  -2   82.26   11.84
   4  -3  -2  230.37   17.39
   3  -3  -2  161.13   12.85
   2  -3  -2   -0.98    2.67
   2  -3  -2   -2.22    2.75
   1  -3  -2 1843.37   91.86
  -1   3   2 1829.74   98.66
   0  -3  -2  880.94   45.09
  -1  -3  -2   38.36    3.61
  -1  -3  -2   23.76    4.75
  -2  -3  -2 5284.80  255.46
  -2  -3  -2 5150.78  269.77
   2   3   2 5213.27  275.16
  -3  -3  -2  973.44   51.05
   3   3   2  972.54   55.24
  -3  -3  -2 1039.40   56.43
   4   3   2  120.03   10.22
  -4  -3  -2  105.12    8.66
  -5  -3  -2    7.56    4.50
   5   3   2   12.74    5.83
   6   3   2   35.19    9.48
  -6  -3  -2   55.10    8.65
  -7  -3  -2   67.79   11.42
  -7  -3  -2  137.24   18.39
   7   3   2   75.31   13.11
   8   3   2  120.48   15.09
  -8  -3  -2  199.01   19.57
  -8  -3  -2  140.90   13.72
  -9  -3  -2   77.41   12.09
   9   3   2   63.11   13.73
  -9  -3  -2   53.70   15.00
 -10  -3  -2    8.99    8.38
  10   3   2    6.95    9.68
 -10  -3  -2  -12.86    9.46
 -11  -3  -2  156.47   25.40
  11   3   2  167.72   20.11
 -12  -3  -2   25.84   15.59
 -13  -3  -2  -12.80   12.84
 -14  -3  -2  -19.62   13.52
 -15  -3  -2   81.17   24.31
 -16  -3  -2   48.52   21.83
 -17  -3  -2   79.56   27.29
  15  -4  -2    5.45   18.31
  14  -4  -2  133.35   26.73
  13  -4  -2   40.35   17.28
 -13   4   2   61.64   18.44
  12  -4  -2   41.81   17.29
  11  -4  -2  710.39   51.25
  10  -4  -2  518.52   39.92
   9  -4  -2  310.28   27.52
   8  -4  -2   19.22   10.10
   7  -4  -2 1688.90   97.70
   6  -4  -2   68.88   11.85
   5  -4  -2  730.53   45.06
   4  -4  -2  370.92   25.15
   3  -4  -2   61.62    7.40
   3  -4  -2   80.74    8.48
   2  -4  -2   53.19    7.41
   2  -4  -2   59.56    6.27
   1  -4  -2  287.55   16.81
   0  -4  -2  639.66   34.18
   0   4   2  653.39   36.33
   0  -4  -2  663.16   35.59
  -1  -4  -2  130.16    7.82
  -1  -4  -2   92.93    8.61
  -2  -4  -2   30.11    6.40
  -2  -4  -2   31.91    5.04
   2   4   2   31.79    4.92
   3   4   2 2521.23  135.65
  -3  -4  -2 2557.94  126.36
   4   4   2  147.70   11.40
  -4  -4  -2  139.29   10.37
  -5  -4  -2    6.61    4.33
   5   4   2    6.08    4.93
  -6  -4  -2  598.24   32.65
   6   4   2  522.15   35.21
  -7  -4  -2  979.34   53.50
   7   4   2  971.36   58.42
  -8  -4  -2  378.19   31.02
   8   4   2  405.33   30.08
  -8  -4  -2  444.61   27.16
   9   4   2   15.68    9.14
  -9  -4  -2   32.32    9.25
  -9  -4  -2   23.19   12.49
 -10  -4  -2   11.38   12.19
  10   4   2    3.72    9.95
 -10  -4  -2    0.42    8.21
  11   4   2  165.19   23.50
 -11  -4  -2  225.18   29.22
 -12  -4  -2    2.81   13.64
 -13  -4  -2  144.03   26.95
 -14  -4  -2   36.10   20.94
 -15  -4  -2   18.91   21.25
 -16  -4  -2  -15.69   17.11
 -17  -4  -2   38.44   21.94
  16  -5  -2   16.52   19.25
  15  -5  -2   63.88   22.25
  14  -5  -2  107.99   25.04
 -13   5   2   46.44   16.70
  13  -5  -2   24.90   17.53
 -12   5   2  306.60   27.05
  12  -5  -2  254.61   28.25
  11  -5  -2  717.19   52.03
  10  -5  -2  232.05   24.15
   9  -5  -2   10.03    9.74
   8  -5  -2 2484.71  140.92
   7  -5  -2   75.16   14.42
   6  -5  -2   80.61   13.00
   5  -5  -2  238.36   19.20
   4  -5  -2  482.89   30.54
   4  -5  -2  445.61   27.82
   3  -5  -2 1003.94   58.51
   3  -5  -2 1046.01   54.59
   2  -5  -2 1109.63   60.28
   2  -5  -2 1219.02   65.09
   1  -5  -2  264.94   16.61
   1  -5  -2  250.60   15.76
   0  -5  -2  834.33   43.81
   0   5   2  821.65   46.29
   0  -5  -2  867.99   45.43
  -1  -5  -2 2735.78  137.08
  -1  -5  -2 2806.01  144.79
  -2  -5  -2  126.64    9.17
   3   5   2 1972.64  108.49
  -3  -5  -2 2079.29  101.85
   4   5   2  633.58   37.17
  -4  -5  -2  653.00   35.31
   5   5   2   94.67    9.62
  -5  -5  -2   95.91    8.99
  -6  -5  -2  120.68   11.31
   6   5   2  134.40   12.48
  -7  -5  -2  510.87   30.94
   7   5   2  506.13   33.62
   8   5   2    4.97    7.52
  -8  -5  -2    2.96    6.25
  -9  -5  -2   -1.17    6.61
   9   5   2   -1.52    7.72
  -9  -5  -2   10.06   10.17
  10   5   2  216.28   21.53
 -10  -5  -2  214.15   24.73
 -10  -5  -2  257.72   20.11
 -11  -5  -2   44.16   16.81
 -12  -5  -2   30.46   15.99
 -13  -5  -2   -3.62   13.69
 -14  -5  -2  211.60   34.16
 -15  -5  -2   29.77   19.67
 -16  -5  -2   16.03   19.72
 -17  -5  -2   37.25   24.94
  16  -6  -2  154.41   32.70
  15  -6  -2   38.27   21.91
  14  -6  -2   51.41   21.92
  13  -6  -2   35.80   17.49
  12  -6  -2  417.53   36.04
 -12   6   2  339.36   30.83
  11  -6  -2  456.53   38.22
  10  -6  -2   38.45   14.25
   9  -6  -2  228.54   23.12
   8  -6  -2  146.61   17.68
   7  -6  -2   22.60   10.60
   6  -6  -2  141.08   15.24
   5  -6  -2    3.43    4.97
   4  -6  -2  667.36   41.63
   4  -6  -2  684.19   38.60
   3  -6  -2  199.17   15.55
   3  -6  -2  189.04   14.14
   2  -6  -2  629.20   37.14
   2  -6  -2  622.48   34.68
   1  -6  -2   40.71    6.58
   0  -6  -2 1366.95   71.00
   0  -6  -2 1344.02   68.46
   0   6   2 1310.28   72.56
  -1  -6  -2 1027.89   52.86
  -2  -6  -2   17.18    4.70
  -3  -6  -2   36.26    6.32
   3   6   2   44.22    4.99
  -4  -6  -2   70.17    7.42
   4   6   2   76.65    7.33
   5   6   2  606.30   36.29
  -5  -6  -2  617.94   34.84
   6   6   2  105.31   11.13
  -6  -6  -2  100.85   10.58
   7   6   2   50.32   10.89
  -7  -6  -2   58.75   10.75
  -8  -6  -2   47.65    9.84
   8   6   2   14.29    8.71
   9   6   2   64.11   13.06
  -9  -6  -2   71.76   13.22
 -10  -6  -2    1.10   11.48
 -10  -6  -2   45.57   12.22
  10   6   2   36.79   11.75
 -11  -6  -2    7.74   14.78
 -12  -6  -2   -4.75   12.37
 -13  -6  -2   11.16   16.11
 -14  -6  -2    9.40   17.35
 -15  -6  -2  -16.41   16.68
 -16  -6  -2   42.09   23.16
 -17  -6  -2    1.29   20.89
  17  -7  -2   26.51   21.20
  16  -7  -2  -16.56   16.01
  15  -7  -2   55.91   23.52
  14  -7  -2    6.36   15.92
  13  -7  -2    2.58   13.40
  12  -7  -2  131.80   24.73
 -11   7   2   67.48   16.26
  11  -7  -2  154.25   24.60
  10  -7  -2  204.20   23.08
   9  -7  -2  166.32   22.82
   8  -7  -2  412.18   32.67
   7  -7  -2  353.79   28.38
   6  -7  -2  683.63   44.61
   5  -7  -2  575.71   37.62
   5  -7  -2  564.74   34.59
   4  -7  -2   30.75    7.64
   4  -7  -2   19.89    6.70
   3  -7  -2  940.95   50.72
   3  -7  -2  927.60   54.56
   2  -7  -2  125.46    9.63
   2  -7  -2   83.92    9.33
   1  -7  -2 1603.96   83.82
   1  -7  -2 1455.61   78.28
   0   7   2   63.75    6.62
   0  -7  -2   79.76    6.96
   0  -7  -2   84.00    7.65
  -1  -7  -2    7.76    3.72
  -2  -7  -2   48.91    6.91
  -3  -7  -2  565.93   31.55
  -4  -7  -2  202.86   14.58
   4   7   2  215.57   14.06
   5   7   2  745.68   42.74
  -5  -7  -2  735.53   41.30
  -6  -7  -2 1376.79   72.98
   6   7   2 1376.81   77.05
   7   7   2   -6.61    5.81
  -7  -7  -2    1.56    6.19
  -8  -7  -2  186.14   16.08
   8   7   2  171.75   16.63
  -9  -7  -2   -3.42    6.99
   9   7   2   -1.45    7.33
 -10  -7  -2  149.98   15.81
 -11  -7  -2  -13.07   13.45
 -12  -7  -2  199.69   30.23
 -13  -7  -2   29.41   17.56
 -14  -7  -2    9.96   16.54
 -15  -7  -2   13.37   19.22
 -16  -7  -2   30.75   22.27
 -17  -7  -2   32.50   23.95
  17  -8  -2   45.50   26.18
  16  -8  -2   15.17   21.03
  15  -8  -2   18.88   19.62
  14  -8  -2    9.50   16.98
  13  -8  -2   96.84   23.42
  12  -8  -2   82.47   21.75
  11  -8  -2  918.00   66.98
 -11   8   2 1077.57   61.89
  10  -8  -2  137.52   22.09
 -10   8   2   89.25   15.03
   9  -8  -2  300.39   27.77
  -9   8   2  305.82   23.23
   8  -8  -2   37.92   12.69
   7  -8  -2 1507.74   89.42
   6  -8  -2    2.57    7.14
   6  -8  -2   -4.70    5.67
   5  -8  -2  605.82   37.99
   5  -8  -2  674.42   41.89
   4  -8  -2    3.63    4.81
   4  -8  -2    8.53    5.79
   3  -8  -2  600.62   37.74
   3  -8  -2  743.97   41.71
   2  -8  -2  609.08   37.41
   2  -8  -2  635.88   35.37
   1  -8  -2 1109.50   63.19
   1  -8  -2 1161.61   59.85
   0  -8  -2  202.20   13.99
   0  -8  -2  203.65   13.56
   1   8   2  117.98    8.97
  -1  -8  -2  140.39   10.13
  -2  -8  -2  517.44   29.13
  -3  -8  -2  316.13   19.71
  -4  -8  -2  394.50   24.35
   4   8   2  406.60   23.57
   5   8   2   25.00    5.93
  -5  -8  -2   13.76    6.61
  -6  -8  -2  295.39   20.75
   6   8   2  306.83   20.77
   7   8   2  402.34   27.44
  -7  -8  -2  424.91   27.24
   8   8   2   49.12   10.77
  -8  -8  -2   53.05   11.32
  -9  -8  -2   -0.31    7.60
   9   8   2   -6.89    6.88
 -10  -8  -2   10.35   10.08
 -11  -8  -2  271.21   29.75
 -12  -8  -2   47.29   19.16
 -13  -8  -2   65.27   21.41
 -14  -8  -2   75.60   24.38
 -15  -8  -2   19.07   19.89
 -16  -8  -2   99.13   28.81
 -17  -8  -2  115.49   31.81
  17  -9  -2  145.03   32.80
  16  -9  -2   -5.52   18.23
  15  -9  -2  133.81   28.87
  14  -9  -2   -8.40   14.43
  13  -9  -2  217.31   33.68
  12  -9  -2  165.75   27.80
  11  -9  -2  497.58   41.33
  10  -9  -2  -10.64   10.43
 -10   9   2   -5.69    7.62
  -9   9   2   18.02    8.71
   9  -9  -2   52.97   15.03
  -8   9   2  201.25   17.70
   8  -9  -2  273.47   24.57
  -7   9   2  154.46   12.31
   7  -9  -2  106.94   17.74
   6  -9  -2   41.48   12.06
  -6   9   2   59.35    7.32
   6  -9  -2   89.36   13.39
   5  -9  -2  336.29   22.77
  -5   9   2  339.95   18.72
   5  -9  -2  252.64   23.00
   4  -9  -2   27.79    7.25
   4  -9  -2   31.14    8.13
   3  -9  -2 1376.38   70.37
   3  -9  -2 1259.89   74.98
   2  -9  -2    4.55    4.91
   2  -9  -2    0.08    4.55
   1  -9  -2 1474.68   78.51
   1  -9  -2 1359.74   73.74
   0  -9  -2 2667.78  144.81
   0  -9  -2 2752.03  136.16
   1   9   2  819.00   43.98
  -1  -9  -2  769.06   42.54
  -2  -9  -2    5.45    4.23
  -3  -9  -2 1429.29   74.17
   4   9   2  317.07   18.96
  -4  -9  -2  320.28   20.75
   5   9   2   10.43    4.95
  -5  -9  -2   13.45    6.63
  -6  -9  -2   89.39   12.77
   6   9   2   87.69    9.58
   7   9   2   27.72    8.17
  -7  -9  -2   40.01   10.36
  -8  -9  -2  290.70   21.49
   8   9   2  268.07   21.25
  -9  -9  -2   36.45   11.09
 -10  -9  -2   -4.96    9.41
 -11  -9  -2   13.89   15.16
 -12  -9  -2   -3.14   14.66
 -13  -9  -2   68.05   21.89
 -14  -9  -2   32.75   20.89
 -15  -9  -2  102.72   27.77
 -16  -9  -2    1.92   19.42
 -17  -9  -2  135.12   32.45
  18 -10  -2    9.53   24.85
  17 -10  -2   16.63   22.84
  16 -10  -2   73.22   27.77
  15 -10  -2    8.97   16.55
  14 -10  -2  -11.91   14.63
  13 -10  -2   82.68   22.76
  12 -10  -2  221.90   27.05
  11 -10  -2   22.48   15.36
  10 -10  -2   30.60   14.88
  -9  10   2  237.87   18.27
   9 -10  -2  183.98   21.94
  -8  10   2  354.05   23.12
   8 -10  -2  314.57   28.44
   7 -10  -2  356.19   29.35
  -7  10   2  364.47   23.18
   6 -10  -2    8.70    8.27
   6 -10  -2   21.90    8.28
  -6  10   2   21.74    5.16
  -5  10   2  613.89   34.07
   5 -10  -2  649.24   41.52
   5 -10  -2  614.63   38.06
   4 -10  -2  642.95   38.74
   4 -10  -2  661.70   41.77
   3 -10  -2  441.13   28.44
   3 -10  -2  386.59   26.14
   2 -10  -2   65.98    9.70
   2 -10  -2   37.61    8.84
   1 -10  -2  368.88   22.37
   1 -10  -2  317.49   22.12
   0 -10  -2 1180.33   61.78
   0 -10  -2 1161.30   64.63
   1  10   2  708.74   39.66
  -1 -10  -2  705.76   38.94
  -2 -10  -2   -1.27    3.76
  -3 -10  -2  119.86   10.69
  -4 -10  -2   -7.59    4.28
   5  10   2 1351.62   73.31
  -5 -10  -2 1346.79   71.93
   6  10   2  125.04   10.54
  -6 -10  -2  122.14   12.46
  -7 -10  -2  687.50   40.30
   7  10   2  649.80   39.80
  -8 -10  -2    0.79    7.44
  -9 -10  -2  660.30   41.12
 -10 -10  -2   -0.86    9.65
 -11 -10  -2  301.26   25.06
 -12 -10  -2   33.32   18.73
 -13 -10  -2   19.74   15.98
 -14 -10  -2   -3.95   14.94
 -15 -10  -2   27.86   19.04
 -16 -10  -2    8.30   17.96
 -17 -10  -2    5.39   18.87
  18 -11  -2    4.39   23.16
  17 -11  -2   -6.23   19.70
  16 -11  -2   43.03   23.18
  15 -11  -2    7.82   18.33
  14 -11  -2   35.79   20.40
  13 -11  -2  139.52   27.70
  12 -11  -2  299.02   32.03
  11 -11  -2   23.52   16.01
  10 -11  -2  112.96   21.20
   9 -11  -2   -1.96   10.01
   8 -11  -2  328.41   28.08
  -8  11   2  275.27   20.36
   7 -11  -2   55.60   12.71
   7 -11  -2   58.46   14.06
  -7  11   2   36.28    7.57
   6 -11  -2  362.65   26.37
  -6  11   2  340.71   21.73
   6 -11  -2  406.54   29.69
   5 -11  -2   40.43    9.87
   5 -11  -2   31.45    9.94
   4 -11  -2  627.26   40.86
   4 -11  -2  767.44   45.05
   3 -11  -2   96.58   10.66
   3 -11  -2   79.45   12.25
   2 -11  -2    3.75    5.88
   2 -11  -2   35.48    7.61
   1 -11  -2   23.38    6.40
   1 -11  -2    9.96    6.09
   0 -11  -2  116.60    9.92
   0 -11  -2  118.74   10.33
  -1 -11  -2  807.32   44.30
   1  11   2  815.96   45.30
  -2 -11  -2   65.30    7.37
  -3 -11  -2   51.20    8.98
  -4 -11  -2  331.43   22.13
  -5 -11  -2 1401.38   74.81
  -6 -11  -2  505.42   32.00
   6  11   2  507.17   29.77
  -7 -11  -2   25.81    9.71
   7  11   2   32.06    7.13
  -8 -11  -2  411.31   28.63
  -9 -11  -2   54.72   13.53
 -10 -11  -2  315.70   25.45
 -11 -11  -2    7.58   11.11
 -12 -11  -2  102.99   25.01
 -13 -11  -2  287.14   32.99
 -14 -11  -2   20.23   18.34
 -15 -11  -2    2.19   18.14
 -16 -11  -2   47.15   24.08
 -17 -11  -2   16.97   21.47
  17 -12  -2   -6.71   18.09
  16 -12  -2  103.56   29.18
  15 -12  -2    3.02   18.83
  14 -12  -2  206.34   33.92
  13 -12  -2   48.10   19.87
  12 -12  -2    8.71   15.17
  11 -12  -2  371.61   35.30
  10 -12  -2   24.62   15.01
   9 -12  -2    9.02   11.77
   8 -12  -2    5.75   10.68
   7 -12  -2   78.24   14.18
  -7  12   2   52.86    7.98
   7 -12  -2   49.64   12.33
  -6  12   2  183.63   11.78
   6 -12  -2  147.61   17.71
   6 -12  -2  192.69   17.35
   5 -12  -2    7.82    7.99
   5 -12  -2    9.95    8.30
   4 -12  -2  422.38   32.68
   4 -12  -2  549.04   32.13
   3 -12  -2   75.89   11.96
   3 -12  -2   37.27    9.44
   2 -12  -2 1367.54   72.59
   2 -12  -2 1340.60   77.00
   1 -12  -2  169.53   14.13
   1 -12  -2  191.59   15.01
   0 -12  -2  272.41   18.35
   0 -12  -2  243.63   17.55
   1  12   2 1454.43   79.51
  -1 -12  -2 1468.10   76.45
  -2 -12  -2  444.46   27.08
  -3 -12  -2   39.40    8.56
  -4 -12  -2 1069.20   58.38
  -5 -12  -2   50.46   10.90
   6  12   2  258.96   17.10
  -6 -12  -2  292.40   21.22
  -7 -12  -2    5.11    8.03
  -8 -12  -2   10.19    9.45
  -9 -12  -2   82.13   15.42
 -10 -12  -2   88.88   17.72
 -11 -12  -2    7.14   11.50
 -12 -12  -2  186.73   30.74
 -13 -12  -2   13.12   17.05
 -14 -12  -2  173.28   31.40
 -15 -12  -2   -4.36   14.80
 -16 -12  -2  130.44   29.40
 -17 -12  -2   32.54   25.17
  17 -13  -2   69.26   25.60
  16 -13  -2   18.52   20.14
  15 -13  -2  113.73   29.18
  14 -13  -2   30.70   19.91
  13 -13  -2   52.45   22.26
  12 -13  -2   19.56   16.37
  11 -13  -2   30.37   15.62
  10 -13  -2  307.44   30.84
   9 -13  -2   10.71   12.62
   8 -13  -2  124.50   18.53
   8 -13  -2   56.49   16.44
  -7  13   2  219.11   15.02
   7 -13  -2  217.67   21.69
   7 -13  -2  251.98   21.68
  -6  13   2   74.38    6.69
   6 -13  -2   80.93   14.82
   6 -13  -2   91.20   16.14
   5 -13  -2  477.63   35.52
   5 -13  -2  530.66   33.83
   4 -13  -2 2074.18  110.26
   4 -13  -2 2113.83  118.17
   3 -13  -2   66.02   11.35
   3 -13  -2   44.43   11.00
   2 -13  -2  455.05   30.68
   2 -13  -2  530.57   32.64
   1 -13  -2  303.59   21.03
   1 -13  -2  290.25   20.56
   0 -13  -2 1817.69   96.94
   0 -13  -2 1719.68   91.95
  -1 -13  -2  366.78   23.38
  -2 -13  -2   53.54    9.11
   2  13   2   32.56    5.42
  -3 -13  -2  408.78   26.20
  -4 -13  -2 1014.99   56.17
  -5 -13  -2   93.23   13.50
  -6 -13  -2  426.50   28.68
  -7 -13  -2   66.00   12.99
  -8 -13  -2 1168.65   66.14
  -9 -13  -2    9.88   10.91
 -10 -13  -2  268.23   23.74
 -11 -13  -2   -6.11    9.21
 -13 -13  -2   -8.37   14.94
 -14 -13  -2    8.84   17.16
 -15 -13  -2   46.55   23.33
 -16 -13  -2    2.19   18.09
 -17 -13  -2    8.59   20.66
  17 -14  -2   22.89   25.03
  16 -14  -2  -11.07   20.37
  15 -14  -2  105.39   28.15
  14 -14  -2  115.73   28.58
  13 -14  -2   48.08   20.61
  12 -14  -2  -22.24   12.65
  11 -14  -2  256.99   29.86
  10 -14  -2  102.60   22.62
   9 -14  -2  314.59   30.36
   8 -14  -2  196.05   21.77
   8 -14  -2  158.39   18.28
   7 -14  -2   48.08   12.30
   7 -14  -2   26.86   11.62
   6 -14  -2  150.64   19.53
   6 -14  -2  105.32   18.04
   5 -14  -2  365.02   27.22
   4 -14  -2   24.25   10.02
   3 -14  -2  923.45   55.88
   3 -14  -2  908.94   52.85
   2 -14  -2 1063.36   58.23
   2 -14  -2 1003.13   60.75
   1 -14  -2   35.98    9.14
   0 -14  -2 1396.94   81.15
   0 -14  -2 1534.00   78.17
  -1 -14  -2  500.62   30.67
   2  14   2  733.93   40.26
  -2 -14  -2  701.12   41.14
  -3 -14  -2   39.74    9.43
  -4 -14  -2 1589.09   84.39
  -5 -14  -2 1034.92   58.01
  -6 -14  -2   -4.48    6.46
  -7 -14  -2  454.55   30.74
  -8 -14  -2   57.33   13.79
  -9 -14  -2  958.75   57.10
 -10 -14  -2   68.91   16.32
 -11 -14  -2   82.39   17.70
 -13 -14  -2    2.93   15.93
 -14 -14  -2   27.29   19.49
 -15 -14  -2   19.53   19.51
 -16 -14  -2   99.89   27.76
  17 -15  -2   59.12   27.60
  16 -15  -2   29.22   25.28
  15 -15  -2   79.10   25.49
  14 -15  -2   81.57   25.82
  13 -15  -2  210.66   34.40
  12 -15  -2    8.13   16.08
  11 -15  -2  116.94   23.42
  10 -15  -2   -1.84   13.08
   9 -15  -2   31.43   15.06
   8 -15  -2   83.01   18.42
   8 -15  -2   98.90   17.95
   7 -15  -2   88.11   17.07
   7 -15  -2   18.77   11.59
   6 -15  -2  424.75   31.10
   6 -15  -2  421.71   33.26
   5 -15  -2  452.42   34.62
   5 -15  -2  504.57   33.51
   4 -15  -2  165.63   16.84
   4 -15  -2  175.83   17.44
   3 -15  -2   60.23   12.76
   2 -15  -2   14.93    8.02
   2 -15  -2   -8.95    5.96
   1 -15  -2 1122.26   62.58
   1 -15  -2 1135.92   65.14
  -1 -15  -2 4300.56  227.07
  -1 -15  -2 4250.30  214.19
   2  15   2    3.86    4.43
  -2 -15  -2    6.01    5.53
  -3 -15  -2  125.16   12.76
  -4 -15  -2  357.57   24.95
  -5 -15  -2 1174.02   65.16
  -6 -15  -2   19.30    9.60
  -7 -15  -2   29.64   10.68
  -8 -15  -2   38.02   12.68
  -9 -15  -2   70.19   16.10
 -10 -15  -2   32.88   14.03
 -11 -15  -2   51.78   16.39
 -13 -15  -2  293.21   39.38
 -14 -15  -2   14.47   16.35
 -15 -15  -2   20.98   19.62
 -16 -15  -2   11.34   18.78
  17 -16  -2    5.33   24.03
  16 -16  -2   59.96   25.63
  15 -16  -2   -3.67   16.20
  14 -16  -2  103.58   28.27
  13 -16  -2   -4.21   16.81
  12 -16  -2   -5.26   14.65
  11 -16  -2    3.63   12.96
  10 -16  -2   37.24   17.21
   9 -16  -2  444.12   38.57
   9 -16  -2  475.68   35.40
   8 -16  -2   -5.26    8.95
   8 -16  -2    4.92    9.36
   7 -16  -2  580.11   44.51
   7 -16  -2  661.75   42.69
   6 -16  -2  172.52   19.61
   6 -16  -2  163.11   18.05
   5 -16  -2  494.65   35.05
   5 -16  -2  429.46   32.27
   4 -16  -2   -1.09    7.33
   4 -16  -2   -0.70    7.61
   3 -16  -2 1899.08  106.99
   3 -16  -2 1858.80  100.59
   2 -16  -2   -1.95    6.72
   2 -16  -2    6.30    8.38
   1 -16  -2   86.80   12.21
   1 -16  -2   54.40   10.45
   0 -16  -2  570.33   34.96
   0 -16  -2  553.40   34.72
   2  16   2   -3.55    4.02
  -2 -16  -2    1.08    5.31
  -3 -16  -2  238.80   18.43
  -4 -16  -2  314.97   23.16
  -5 -16  -2  618.97   38.47
  -6 -16  -2  183.08   17.29
  -7 -16  -2   25.75   10.37
  -8 -16  -2   11.38   10.64
  -9 -16  -2  349.76   27.56
 -10 -16  -2   32.25   14.31
 -11 -16  -2   82.18   18.07
 -13 -16  -2  133.29   28.61
 -14 -16  -2   43.02   21.13
 -15 -16  -2   15.40   18.34
 -16 -16  -2   -2.15   18.49
  17 -17  -2   -7.54   22.64
  16 -17  -2  -12.39   19.91
  15 -17  -2    7.38   17.26
  14 -17  -2   -1.63   17.76
  13 -17  -2   33.08   21.32
  12 -17  -2  -14.35   13.87
  11 -17  -2  225.10   32.91
  10 -17  -2  676.30   52.46
   9 -17  -2   -1.23   11.67
   9 -17  -2   18.25   12.09
   8 -17  -2   13.45   11.44
   8 -17  -2   31.96   12.45
   7 -17  -2   79.91   17.72
   7 -17  -2  123.88   21.00
   6 -17  -2  255.94   23.86
   6 -17  -2  186.89   20.45
   5 -17  -2  155.76   17.36
   5 -17  -2  147.03   17.62
   4 -17  -2  121.38   14.72
   4 -17  -2  174.04   17.54
   3 -17  -2  547.76   35.26
   3 -17  -2  490.17   35.51
   2 -17  -2   76.46   14.57
   2 -17  -2  108.35   15.36
   1 -17  -2   90.09   13.58
   1 -17  -2  135.27   17.13
   0 -17  -2   62.64   12.21
   0 -17  -2   51.45    9.72
  -1 -17  -2  762.36   44.41
  -1 -17  -2  743.06   43.82
   2  17   2  240.68   16.42
  -3 -17  -2  111.03   15.07
  -4 -17  -2  271.51   20.89
  -5 -17  -2  137.20   14.90
  -6 -17  -2  209.62   18.86
  -7 -17  -2   21.50   10.87
  -8 -17  -2  560.07   37.54
  -9 -17  -2    9.32   11.60
 -10 -17  -2  105.36   19.22
 -11 -17  -2    6.48   12.09
 -13 -17  -2   10.90   17.11
 -14 -17  -2    1.44   16.59
 -15 -17  -2   13.40   17.63
 -16 -17  -2    7.12   19.84
  17 -18  -2   -7.06   23.98
  16 -18  -2   17.03   22.75
  15 -18  -2   67.22   23.79
  14 -18  -2  154.10   33.33
  13 -18  -2  -10.16   15.65
  12 -18  -2   22.69   18.54
  11 -18  -2   34.46   18.66
  10 -18  -2  405.46   38.03
   9 -18  -2    3.15   12.08
   9 -18  -2    8.00   12.24
   8 -18  -2   -3.39   10.32
   8 -18  -2   17.31   12.39
   7 -18  -2  133.20   23.57
   7 -18  -2  203.38   25.45
   6 -18  -2  190.22   21.94
   6 -18  -2  215.80   21.62
   5 -18  -2   32.99   12.20
   5 -18  -2   70.09   15.10
   4 -18  -2  635.16   41.58
   4 -18  -2  636.36   43.61
   3 -18  -2   27.92   10.77
   3 -18  -2   17.78   10.19
   2 -18  -2 1932.73  112.21
   2 -18  -2 2049.97  106.78
   1 -18  -2  336.98   24.85
   1 -18  -2  356.15   25.75
   0 -18  -2  913.10   51.81
   0 -18  -2  858.16   52.10
  -1 -18  -2  466.47   29.56
  -1 -18  -2  416.65   27.76
  -2 -18  -2 1085.55   61.77
   2  18   2 1126.17   61.57
  -3 -18  -2   77.54   13.73
  -4 -18  -2  833.79   49.35
  -5 -18  -2   33.30    9.71
  -6 -18  -2    2.41    8.56
  -7 -18  -2   -0.01    9.69
  -8 -18  -2   49.72   14.74
  -9 -18  -2  139.04   21.44
 -10 -18  -2   66.60   17.15
 -11 -18  -2  106.59   20.01
 -13 -18  -2   11.01   17.64
 -14 -18  -2   51.06   21.38
 -15 -18  -2   -6.43   15.12
 -16 -18  -2  145.66   32.57
  16 -19  -2   23.60   24.20
  15 -19  -2   32.97   21.55
  14 -19  -2  -13.49   18.21
  13 -19  -2   36.10   23.25
  12 -19  -2  -16.06   15.16
  11 -19  -2   47.49   20.47
  10 -19  -2  553.48   48.35
  10 -19  -2  653.80   45.89
   9 -19  -2    7.32   13.87
   9 -19  -2    7.73   12.24
   8 -19  -2  174.65   26.83
   8 -19  -2  196.02   26.67
   7 -19  -2   25.40   12.98
   7 -19  -2    7.43   11.74
   6 -19  -2  931.77   56.00
   6 -19  -2  794.28   57.31
   5 -19  -2  324.85   27.08
   5 -19  -2  319.01   27.87
   4 -19  -2  229.99   21.63
   4 -19  -2  206.15   20.54
   3 -19  -2  436.72   30.66
   3 -19  -2  375.33   30.27
   2 -19  -2  164.17   16.70
   1 -19  -2  290.33   23.97
   1 -19  -2  348.62   24.58
   0 -19  -2   49.33   10.80
   0 -19  -2   82.07    9.92
  -1 -19  -2  715.44   40.65
  -1 -19  -2  631.24   40.94
   2  19   2  907.25   51.97
  -2 -19  -2  926.46   53.26
  -3 -19  -2   61.83   13.22
  -4 -19  -2    7.18    8.71
  -5 -19  -2   10.50    9.11
  -6 -19  -2  363.93   27.43
  -7 -19  -2  -20.06    8.29
  -8 -19  -2  151.43   21.56
  -9 -19  -2   -3.09   11.55
 -10 -19  -2   73.88   17.77
 -11 -19  -2   32.45   15.29
 -13 -19  -2   43.52   21.12
 -14 -19  -2    4.23   17.10
 -15 -19  -2   10.84   16.54
 -16 -19  -2   31.01   21.05
  16 -20  -2   64.78   28.69
  15 -20  -2   42.70   25.24
  14 -20  -2  -14.80   18.37
  13 -20  -2   26.95   20.82
  12 -20  -2   -2.24   17.09
  11 -20  -2   20.38   18.06
  10 -20  -2  226.87   30.63
  10 -20  -2  172.83   30.18
   9 -20  -2  552.90   45.85
   9 -20  -2  570.49   43.07
   8 -20  -2   18.98   14.28
   8 -20  -2   32.03   15.18
   7 -20  -2  673.13   45.16
   7 -20  -2  565.51   45.86
   6 -20  -2   70.60   18.06
   6 -20  -2   45.17   15.60
   5 -20  -2  188.53   21.43
   5 -20  -2  274.95   24.39
   4 -20  -2   -0.13    8.64
   4 -20  -2   -0.59    9.28
   3 -20  -2  878.07   56.14
   3 -20  -2  994.67   59.83
   2 -20  -2  136.39   15.17
   2 -20  -2  116.72   17.98
   1 -20  -2  274.57   22.28
   1 -20  -2  297.74   23.14
   0 -20  -2   91.44   15.52
   0 -20  -2   88.56   12.91
  -1 -20  -2  204.95   15.98
  -1 -20  -2  194.00   18.27
  -2 -20  -2  791.25   47.09
   2  20   2  769.19   45.14
  -3 -20  -2   81.49   14.60
  -4 -20  -2  197.28   18.70
  -5 -20  -2  271.57   22.73
  -6 -20  -2    0.37    8.85
  -7 -20  -2    1.77   10.67
  -8 -20  -2   -9.68    9.94
  -9 -20  -2  325.81   27.48
 -10 -20  -2  132.86   22.71
 -11 -20  -2  143.39   23.78
 -12 -20  -2   22.77   16.14
 -13 -20  -2   64.57   23.05
 -14 -20  -2   -8.30   13.63
 -15 -20  -2   32.88   20.44
  16 -21  -2   10.51   25.59
  15 -21  -2   30.81   23.94
  14 -21  -2  -26.22   15.70
  13 -21  -2  116.77   29.28
  12 -21  -2   16.17   17.92
  11 -21  -2  311.67   34.59
  10 -21  -2   93.16   24.24
  10 -21  -2   74.33   20.76
   9 -21  -2   83.96   21.73
   9 -21  -2   52.21   18.60
   8 -21  -2    5.76   12.76
   8 -21  -2    8.63   12.20
   7 -21  -2   33.78   15.33
   7 -21  -2   23.96   15.11
   6 -21  -2   12.25   13.44
   6 -21  -2    0.80   12.02
   5 -21  -2  256.59   23.85
   5 -21  -2  187.10   21.85
   4 -21  -2   76.55   16.00
   4 -21  -2   48.65   14.20
   3 -21  -2  976.08   65.29
   3 -21  -2 1148.03   64.19
   2 -21  -2  183.49   18.57
   2 -21  -2  138.43   16.61
   1 -21  -2  381.27   27.59
   1 -21  -2  370.00   28.19
   0 -21  -2   33.97    9.42
   0 -21  -2   55.91   13.45
  -1 -21  -2  995.01   58.54
  -1 -21  -2 1022.28   58.42
  -2 -21  -2   78.00   14.35
   2  21   2   41.84    9.50
  -3 -21  -2  921.59   54.56
  -4 -21  -2   11.28    9.45
  -5 -21  -2  206.27   19.79
  -6 -21  -2  126.68   19.71
  -7 -21  -2   14.63   11.96
  -8 -21  -2   82.48   18.12
  -9 -21  -2  134.43   21.82
 -10 -21  -2    1.65   12.59
 -11 -21  -2   37.13   17.95
 -12 -21  -2   -9.29   14.31
 -13 -21  -2   71.68   23.35
 -14 -21  -2  -13.82   13.33
 -15 -21  -2   63.98   23.95
  16 -22  -2   13.06   26.93
  15 -22  -2   10.76   22.78
  14 -22  -2    6.78   20.00
  13 -22  -2   48.86   23.66
  12 -22  -2   36.85   21.32
  11 -22  -2   16.11   17.15
  10 -22  -2  144.12   26.10
  10 -22  -2  147.84   27.31
   9 -22  -2  164.22   28.37
   9 -22  -2  153.90   27.02
   8 -22  -2   60.88   18.53
   8 -22  -2   52.52   18.37
   7 -22  -2  225.64   29.98
   7 -22  -2  215.57   31.03
   6 -22  -2   18.23   13.19
   6 -22  -2    9.04   13.32
   5 -22  -2  145.95   22.42
   5 -22  -2  112.34   21.08
   4 -22  -2  360.03   30.56
   4 -22  -2  389.52   30.75
   3 -22  -2  399.44   30.65
   3 -22  -2  366.32   30.74
   2 -22  -2 1131.05   66.55
   2 -22  -2 1124.72   68.83
   1 -22  -2  347.35   26.40
   1 -22  -2  347.25   27.40
   0 -22  -2   54.79   11.38
   0 -22  -2   37.16   12.63
  -1 -22  -2  193.34   17.16
  -1 -22  -2  248.75   21.05
  -2 -22  -2  539.09   36.08
  -3 -22  -2   62.03   14.49
  -4 -22  -2   73.30   15.19
  -5 -22  -2  431.41   31.08
  -6 -22  -2  103.54   18.62
  -7 -22  -2  448.33   33.70
  -8 -22  -2   99.61   19.13
  -9 -22  -2  284.12   26.38
 -10 -22  -2   29.04   15.04
 -11 -22  -2  182.50   27.08
 -12 -22  -2   24.96   18.45
 -13 -22  -2    8.16   16.80
 -14 -22  -2    4.23   15.85
 -15 -22  -2   26.49   19.48
  16 -23  -2   -1.11   23.33
  15 -23  -2    5.13   22.66
  14 -23  -2  -14.73   16.43
  13 -23  -2    0.22   19.23
  12 -23  -2   41.28   22.07
  11 -23  -2    1.13   17.06
  11 -23  -2   -4.03   15.64
  10 -23  -2  185.80   32.94
  10 -23  -2  288.85   36.79
   9 -23  -2   18.40   17.30
   9 -23  -2    4.92   15.36
   8 -23  -2   62.40   20.00
   8 -23  -2   63.45   19.67
   7 -23  -2  -10.72   11.86
   7 -23  -2   -1.44   11.67
   6 -23  -2  609.74   45.68
   6 -23  -2  581.89   43.68
   5 -23  -2   -8.53    9.54
   5 -23  -2   -5.28   10.51
   4 -23  -2   58.30   14.64
   4 -23  -2  116.31   18.92
   3 -23  -2   24.49   12.71
   3 -23  -2   51.04   14.25
   2 -23  -2  335.40   27.87
   2 -23  -2  349.22   27.75
   1 -23  -2  109.50   15.90
   1 -23  -2   95.23   17.72
   0 -23  -2   41.93   10.64
   0 -23  -2   33.07   13.14
  -1 -23  -2  279.63   21.59
  -1 -23  -2  297.88   24.44
  -2 -23  -2  476.74   33.10
  -3 -23  -2  150.57   17.08
  -4 -23  -2   18.93    9.90
  -5 -23  -2  360.08   28.35
  -6 -23  -2  523.55   37.28
  -7 -23  -2   18.97   13.46
  -8 -23  -2  194.33   26.23
  -9 -23  -2   85.48   20.05
 -10 -23  -2  230.16   29.96
 -11 -23  -2   44.69   18.26
 -12 -23  -2  186.64   28.30
 -13 -23  -2   -1.60   16.10
 -14 -23  -2   -3.90   16.60
 -15 -23  -2   10.45   18.45
  15 -24  -2   -6.83   21.36
  14 -24  -2   26.53   24.43
  13 -24  -2   -8.49   20.61
  12 -24  -2   29.47   22.35
  11 -24  -2    6.35   18.32
  11 -24  -2  -12.62   15.52
  10 -24  -2  137.47   28.29
  10 -24  -2  134.25   28.76
   9 -24  -2   -4.44   14.93
   9 -24  -2   -9.45   12.78
   8 -24  -2   -6.51   13.31
   8 -24  -2    0.15   14.10
   7 -24  -2   29.91   15.88
   7 -24  -2   37.53   16.42
   6 -24  -2   25.05   14.09
   6 -24  -2   12.69   12.52
   5 -24  -2   -4.11   12.44
   5 -24  -2   -5.38   10.78
   4 -24  -2  114.59   20.80
   4 -24  -2   74.41   17.01
   3 -24  -2   96.04   18.98
   3 -24  -2  100.84   19.54
   2 -24  -2  338.04   27.13
   2 -24  -2  312.20   27.02
   1 -24  -2   88.98   16.19
   1 -24  -2   99.75   18.42
   0 -24  -2  529.77   37.72
   0 -24  -2  564.02   36.85
  -1 -24  -2   46.15   13.33
  -2 -24  -2  930.07   56.36
  -3 -24  -2  100.28   17.59
  -4 -24  -2  632.47   41.50
  -5 -24  -2   22.56   13.26
  -6 -24  -2   73.73   16.57
  -7 -24  -2   -4.80    8.71
  -8 -24  -2    8.94   13.64
  -9 -24  -2   38.15   15.49
 -10 -24  -2   80.22   20.49
 -11 -24  -2  -18.56   13.47
 -12 -24  -2  157.76   26.92
 -13 -24  -2    4.31   17.32
 -14 -24  -2   77.63   25.34
  15 -25  -2   -2.39   19.91
  14 -25  -2   -4.93   20.80
  13 -25  -2    6.17   20.01
  12 -25  -2   45.08   22.31
  11 -25  -2   98.03   27.97
  10 -25  -2  114.87   26.81
  10 -25  -2  139.62   29.33
   9 -25  -2    6.26   16.13
   9 -25  -2   14.26   16.41
   8 -25  -2  137.20   27.04
   8 -25  -2  184.64   29.81
   7 -25  -2  -13.54   11.96
   7 -25  -2  -10.31   12.42
   6 -25  -2  125.39   23.48
   6 -25  -2   85.65   21.41
   5 -25  -2   28.02   13.86
   5 -25  -2   26.22   14.14
   4 -25  -2    7.16   11.21
   4 -25  -2   -6.10   10.11
   3 -25  -2  411.16   31.92
   3 -25  -2  343.17   30.40
   2 -25  -2  145.02   17.51
   2 -25  -2  177.39   19.55
   1 -25  -2   25.93   10.82
   1 -25  -2   37.93   13.90
   0 -25  -2   53.10   15.52
   0 -25  -2   73.45   13.07
  -1 -25  -2  332.15   27.39
  -3 -25  -2  339.47   27.37
  -4 -25  -2  175.60   18.55
  -5 -25  -2   29.64   14.21
  -6 -25  -2  111.61   20.44
  -7 -25  -2   49.62   16.85
  -9 -25  -2   72.82   18.97
 -10 -25  -2  286.70   27.85
 -11 -25  -2   88.64   23.39
 -12 -25  -2    9.20   16.47
 -13 -25  -2   43.38   22.37
 -14 -25  -2   13.41   18.20
  15 -26  -2   -1.49   22.69
  14 -26  -2   24.93   23.85
  13 -26  -2   46.50   25.30
  12 -26  -2   -5.28   18.45
  11 -26  -2   18.64   19.42
  10 -26  -2   -0.10   17.38
  10 -26  -2    5.34   17.57
   9 -26  -2   49.06   21.56
   9 -26  -2   46.86   21.14
   8 -26  -2   27.06   18.38
   8 -26  -2   43.87   21.48
   7 -26  -2  177.24   27.92
   7 -26  -2  149.22   28.00
   6 -26  -2   82.49   20.79
   6 -26  -2  118.06   23.85
   5 -26  -2  142.70   23.08
   5 -26  -2   90.25   21.68
   4 -26  -2   20.42   14.74
   4 -26  -2   23.33   14.88
   3 -26  -2  240.80   24.18
   3 -26  -2  223.77   23.63
   2 -26  -2   20.65   12.03
   2 -26  -2   16.50   12.86
   1 -26  -2  158.37   20.52
   1 -26  -2  146.77   22.53
   0 -26  -2  330.11   27.93
  -1 -26  -2   54.41   14.93
  -2 -26  -2    8.85   11.97
  -3 -26  -2  160.51   20.75
  -4 -26  -2   47.91   13.47
  -5 -26  -2  139.22   21.93
  -6 -26  -2   13.04   13.26
  -7 -26  -2  185.20   25.95
  -8 -26  -2   99.65   19.98
 -10 -26  -2   32.28   15.03
 -11 -26  -2  191.42   29.21
 -12 -26  -2  -10.58   16.17
 -13 -26  -2    7.73   18.50
 -14 -26  -2   29.05   21.82
  14 -27  -2   -7.15   22.03
  13 -27  -2   53.03   26.83
  12 -27  -2    2.02   18.51
  11 -27  -2    6.35   19.77
  10 -27  -2    3.64   17.35
  10 -27  -2    1.94   17.29
   9 -27  -2   17.72   17.91
   9 -27  -2   27.19   19.19
   8 -27  -2   -7.17   14.75
   8 -27  -2   -6.29   15.47
   7 -27  -2   -7.18   13.95
   7 -27  -2   -8.10   13.38
   6 -27  -2    0.61   13.79
   6 -27  -2    7.25   14.40
   5 -27  -2   65.59   20.21
   5 -27  -2   65.70   18.37
   4 -27  -2   29.04   15.66
   4 -27  -2   14.18   13.67
   3 -27  -2   93.09   20.08
   3 -27  -2   96.10   19.17
   2 -27  -2    8.24   12.73
   2 -27  -2   42.87   14.27
   1 -27  -2  135.03   16.90
   1 -27  -2  159.25   21.94
   0 -27  -2   41.76   15.14
  -1 -27  -2  645.11   43.99
  -2 -27  -2    6.89   10.93
  -3 -27  -2   42.69   12.67
  -4 -27  -2    6.16    9.98
  -5 -27  -2  468.47   35.49
  -6 -27  -2   16.27   14.75
  -7 -27  -2   20.94   15.37
  -8 -27  -2   53.63   16.31
  -9 -27  -2   38.42   15.61
 -10 -27  -2   15.84   16.45
 -11 -27  -2    1.16   15.94
 -12 -27  -2   17.54   17.38
 -13 -27  -2   81.85   26.68
 -14 -27  -2   45.32   22.75
  14 -28  -2   36.12   26.50
  13 -28  -2   25.36   23.60
  12 -28  -2  -16.72   16.25
  11 -28  -2   60.85   25.38
  10 -28  -2   32.41   21.76
  10 -28  -2    2.54   18.22
   9 -28  -2  163.27   31.58
   9 -28  -2  244.46   36.62
   8 -28  -2    0.75   16.56
   8 -28  -2   -8.34   14.49
   7 -28  -2   34.72   19.01
   7 -28  -2   11.52   17.24
   6 -28  -2    6.22   15.55
   6 -28  -2   17.93   14.73
   5 -28  -2  240.38   26.50
   5 -28  -2  205.35   25.09
   4 -28  -2   44.44   17.65
   4 -28  -2   61.83   17.03
   3 -28  -2   11.62   13.69
   3 -28  -2   12.43   11.81
   2 -28  -2  147.69   18.75
   2 -28  -2  162.44   25.10
   1 -28  -2    2.95   11.99
   0 -28  -2  107.28   20.84
  -1 -28  -2   34.43   15.19
  -2 -28  -2  199.07   20.51
  -3 -28  -2   38.28   15.24
  -4 -28  -2  180.36   19.88
  -5 -28  -2  108.53   21.03
  -6 -28  -2   16.57   14.78
  -7 -28  -2  100.48   22.00
  -8 -28  -2   24.85   15.03
  -9 -28  -2   62.71   20.90
 -10 -28  -2   69.83   20.51
 -11 -28  -2    3.51   16.60
 -12 -28  -2   53.58   20.00
 -13 -28  -2   30.80   22.01
  14 -29  -2    1.10   25.41
  13 -29  -2   28.41   25.51
  12 -29  -2   32.26   23.89
  11 -29  -2   15.18   20.86
  10 -29  -2  104.09   28.26
  10 -29  -2  146.95   33.36
   9 -29  -2  108.16   26.93
   9 -29  -2   38.79   21.93
   8 -29  -2   35.96   22.25
   8 -29  -2   61.25   21.49
   7 -29  -2   92.38   25.36
   7 -29  -2   87.67   23.94
   6 -29  -2  270.34   35.38
   6 -29  -2  211.38   26.94
   5 -29  -2   87.18   22.86
   5 -29  -2  135.39   24.96
   4 -29  -2  261.47   27.57
   4 -29  -2  264.89   27.92
   3 -29  -2   51.74   15.79
   3 -29  -2   52.34   18.30
   2 -29  -2   29.46   13.39
   2 -29  -2   17.86   11.88
   1 -29  -2   80.83   19.94
   0 -29  -2   31.36   15.02
  -1 -29  -2    9.07   13.03
  -2 -29  -2   -6.31   11.58
  -3 -29  -2    7.53   13.10
  -4 -29  -2  205.37   21.36
  -5 -29  -2   49.42   17.23
  -6 -29  -2  193.34   27.39
  -7 -29  -2   14.03   15.05
  -8 -29  -2  269.54   27.19
  -9 -29  -2    9.78   15.27
 -10 -29  -2  162.14   27.54
 -11 -29  -2   -9.42   15.93
 -12 -29  -2   51.41   22.01
 -13 -29  -2   34.87   20.85
  13 -30  -2  -17.75   19.47
  12 -30  -2   92.25   28.61
  11 -30  -2   -5.80   17.27
  10 -30  -2   14.77   20.88
  10 -30  -2   15.57   19.90
   9 -30  -2   11.27   18.16
   9 -30  -2   -1.44   19.68
   8 -30  -2   65.01   25.53
   8 -30  -2   75.24   23.88
   7 -30  -2   -2.34   15.57
   7 -30  -2  -15.80   13.81
   6 -30  -2   72.42   21.12
   6 -30  -2   63.54   20.93
   5 -30  -2   -4.86   15.24
   5 -30  -2    2.70   13.51
   4 -30  -2  195.67   23.72
   4 -30  -2  243.48   32.56
   3 -30  -2   55.89   17.06
   3 -30  -2   44.40   19.51
   2 -30  -2   76.95   20.14
   1 -30  -2    8.97   13.83
   0 -30  -2  753.30   51.59
  -1 -30  -2   25.72   15.04
  -2 -30  -2  129.36   23.37
  -3 -30  -2   -7.18   12.12
  -4 -30  -2   74.88   18.35
  -5 -30  -2  104.55   21.86
  -6 -30  -2   78.19   20.01
  -7 -30  -2   -3.91   13.03
  -8 -30  -2   32.33   17.55
  -9 -30  -2   72.64   21.11
 -10 -30  -2   -5.18   15.63
 -11 -30  -2   -4.45   14.91
 -12 -30  -2   44.54   21.63
 -13 -30  -2   12.47   19.85
  13 -31  -2    1.43   22.96
  12 -31  -2   56.14   25.50
  11 -31  -2    8.53   20.75
  10 -31  -2   55.66   22.74
  10 -31  -2   63.76   26.93
   9 -31  -2   -3.78   19.87
   9 -31  -2   43.78   22.10
   8 -31  -2  237.20   38.16
   8 -31  -2  223.09   35.40
   7 -31  -2   10.47   17.29
   7 -31  -2  -15.01   16.31
   6 -31  -2  101.60   26.47
   6 -31  -2  140.14   27.46
   5 -31  -2   19.06   15.72
   5 -31  -2   12.47   16.46
   4 -31  -2  111.36   21.91
   4 -31  -2   75.51   22.64
   3 -31  -2   -4.28   13.70
   3 -31  -2   -7.83   12.09
   2 -31  -2    4.04   15.02
   1 -31  -2  192.18   28.82
   0 -31  -2   82.25   18.00
  -1 -31  -2  259.52   26.89
  -2 -31  -2   -6.81   12.88
  -3 -31  -2   23.65   14.85
  -4 -31  -2  152.61   24.86
  -5 -31  -2  204.25   23.55
  -6 -31  -2   19.06   15.98
  -7 -31  -2   -5.51   13.33
  -8 -31  -2    6.38   16.31
  -9 -31  -2   -5.64   15.74
 -10 -31  -2   44.82   20.40
 -11 -31  -2   -8.69   16.39
 -12 -31  -2   -0.71   18.45
  13 -32  -2    0.32   24.19
  12 -32  -2   64.41   26.00
  11 -32  -2    6.82   22.03
  10 -32  -2   -7.62   17.93
   9 -32  -2  187.04   34.18
   9 -32  -2  139.10   32.81
   8 -32  -2   47.68   24.98
   8 -32  -2   29.31   20.24
   7 -32  -2  162.72   29.10
   7 -32  -2  161.71   32.85
   6 -32  -2    1.64   14.32
   6 -32  -2   14.39   18.38
   5 -32  -2  293.83   30.60
   5 -32  -2  266.45   30.26
   4 -32  -2  281.09   30.36
   4 -32  -2  274.74   28.65
   3 -32  -2   15.59   16.52
   2 -32  -2    3.29   14.20
   1 -32  -2   36.67   17.63
   0 -32  -2   26.63   16.15
  -1 -32  -2   27.23   16.57
  -2 -32  -2   -4.13   12.36
  -3 -32  -2   56.38   18.29
  -4 -32  -2   14.58   15.21
  -5 -32  -2  147.27   25.23
  -6 -32  -2  -12.53   13.07
  -7 -32  -2   70.72   19.05
  -8 -32  -2  -14.21   15.03
  -9 -32  -2   24.36   18.20
 -10 -32  -2    0.63   16.13
 -11 -32  -2   23.38   17.71
 -12 -32  -2   -2.11   16.69
 -12 -32  -2    3.81   19.26
  12 -33  -2   12.22   24.29
  11 -33  -2  -10.51   19.58
  10 -33  -2   51.80   22.72
   9 -33  -2   27.01   21.65
   9 -33  -2   42.10   23.87
   8 -33  -2    2.16   17.19
   8 -33  -2    3.61   20.94
   7 -33  -2   72.58   23.09
   7 -33  -2   94.73   27.01
   6 -33  -2   28.18   20.49
   6 -33  -2   72.58   21.77
   5 -33  -2   91.63   24.60
   5 -33  -2  145.58   28.60
   4 -33  -2   90.34   24.50
   4 -33  -2   88.89   22.27
   3 -33  -2  146.04   28.40
   2 -33  -2   10.14   15.46
   1 -33  -2  186.41   29.83
   0 -33  -2   95.60   22.69
  -1 -33  -2   50.01   18.24
  -2 -33  -2    0.36   14.17
  -3 -33  -2   43.52   17.81
  -4 -33  -2   -0.16   14.39
  -5 -33  -2    2.43   14.73
  -6 -33  -2    7.07   15.57
  -7 -33  -2    4.22   11.97
  -8 -33  -2    5.81   16.81
  -9 -33  -2   -5.43   16.78
 -10 -33  -2  -10.63   14.90
 -11 -33  -2  -15.28   16.48
 -12 -33  -2   -9.29   19.17
 -12 -33  -2   -8.87   17.15
  12 -34  -2    8.10   22.46
  11 -34  -2   95.65   30.74
  10 -34  -2   48.14   22.88
   9 -34  -2   39.31   25.03
   9 -34  -2   36.78   23.42
   8 -34  -2   17.18   20.40
   8 -34  -2    7.89   19.65
   7 -34  -2   58.28   24.68
   7 -34  -2   90.64   25.79
   6 -34  -2    4.14   17.36
   6 -34  -2   22.24   16.81
   5 -34  -2   72.88   23.50
   5 -34  -2   59.68   22.30
   4 -34  -2   83.07   23.81
   3 -34  -2    6.98   16.31
   2 -34  -2   56.84   19.51
   1 -34  -2   69.53   21.08
   0 -34  -2  233.70   33.15
  -1 -34  -2   58.76   20.40
  -2 -34  -2   18.34   17.59
  -3 -34  -2   -5.57   10.91
  -4 -34  -2   -4.70   13.83
  -5 -34  -2  -16.46   13.17
  -6 -34  -2   14.62   16.47
  -7 -34  -2  163.85   26.60
  -8 -34  -2   -1.07   16.40
  -9 -34  -2   -9.69   16.48
 -10 -34  -2   -8.28   15.97
 -11 -34  -2   36.35   21.44
  12 -35  -2   13.96   25.38
  11 -35  -2   -0.55   22.33
  10 -35  -2    8.84   20.94
   9 -35  -2   -7.01   22.90
   9 -35  -2   18.81   22.46
   8 -35  -2  203.47   38.65
   8 -35  -2  199.42   34.86
   7 -35  -2   33.82   19.93
   7 -35  -2   12.21   22.96
   6 -35  -2   64.46   25.17
   6 -35  -2   98.67   26.46
   5 -35  -2  -11.50   16.74
   5 -35  -2   -2.16   16.55
   4 -35  -2   87.52   24.86
   3 -35  -2   27.19   18.66
   2 -35  -2   74.05   22.98
   1 -35  -2    6.35   15.96
   0 -35  -2    4.20   16.29
  -1 -35  -2   -5.38   14.41
  -2 -35  -2   -0.16   15.38
  -3 -35  -2   88.74   22.66
  -4 -35  -2    7.80   16.31
  -5 -35  -2  -27.46   13.54
  -6 -35  -2  101.13   24.55
  -7 -35  -2   17.88   16.62
  -8 -35  -2   30.81   18.93
  -9 -35  -2    6.69   17.92
 -10 -35  -2   56.77   21.71
 -11 -35  -2   31.35   21.57
  11 -36  -2  -19.95   22.45
  10 -36  -2  -20.56   19.79
   9 -36  -2   25.55   25.37
   9 -36  -2   -0.62   19.67
   8 -36  -2   20.13   21.11
   8 -36  -2   62.98   27.50
   7 -36  -2   -6.15   22.13
   7 -36  -2   -7.30   18.04
   6 -36  -2   -1.45   17.09
   6 -36  -2   -3.01   18.91
   5 -36  -2   16.45   20.02
   4 -36  -2  175.67   32.24
   3 -36  -2   33.63   20.86
   2 -36  -2   42.80   20.25
   1 -36  -2    2.74   16.31
   0 -36  -2   75.48   19.53
  -1 -36  -2    3.24   13.39
  -2 -36  -2  133.22   25.98
  -3 -36  -2   11.67   16.52
  -4 -36  -2   29.83   18.33
  -5 -36  -2   -9.20   14.29
  -6 -36  -2   29.81   19.34
  -7 -36  -2   12.30   16.57
  -8 -36  -2    1.39   15.37
  -9 -36  -2  -17.17   15.67
 -10 -36  -2   13.17   20.04
  11 -37  -2   -7.96   21.01
  10 -37  -2  -13.51   20.21
   9 -37  -2  -12.41   18.88
   8 -37  -2   23.10   21.00
   8 -37  -2    5.50   23.21
   7 -37  -2    1.12   20.72
   7 -37  -2   -6.81   17.26
   6 -37  -2    5.03   20.17
   6 -37  -2  -12.97   17.14
   5 -37  -2  -13.41   18.39
   4 -37  -2    7.08   18.46
   3 -37  -2   39.72   21.13
   2 -37  -2   41.07   21.03
   1 -37  -2   52.88   20.56
   0 -37  -2  -15.32   15.88
  -1 -37  -2   22.83   18.36
  -2 -37  -2   16.55   13.91
  -3 -37  -2   51.86   21.35
  -4 -37  -2   38.28   19.73
  -5 -37  -2   -2.70   15.61
  -6 -37  -2   31.73   18.95
  -7 -37  -2   31.12   19.21
  -8 -37  -2   -5.75   15.59
  -9 -37  -2  -31.35   14.22
 -10 -37  -2   57.64   23.87
  10 -38  -2   -3.21   21.48
   9 -38  -2   21.16   24.09
   8 -38  -2  -16.84   20.25
   8 -38  -2  -13.43   23.58
   7 -38  -2   39.19   23.69
   7 -38  -2   21.71   24.44
   6 -38  -2  -11.03   20.76
   5 -38  -2   36.48   21.34
   4 -38  -2  -17.01   15.29
   3 -38  -2  -22.47   16.61
   2 -38  -2   -7.46   15.46
   1 -38  -2  121.24   27.43
   0 -38  -2  -14.33   15.46
  -1 -38  -2    2.39   16.62
  -2 -38  -2   10.70   16.77
  -3 -38  -2   -4.76   15.59
  -4 -38  -2   -6.86   15.87
  -5 -38  -2    9.46   16.84
  -6 -38  -2    4.91   17.32
  -7 -38  -2  157.36   28.16
  -8 -38  -2  -13.37   16.01
  -9 -38  -2    7.61   18.41
   9 -39  -2   -4.37   22.94
   8 -39  -2   -9.15   21.01
   8 -39  -2   -8.18   22.78
   7 -39  -2   16.22   24.77
   6 -39  -2  -26.95   17.83
   5 -39  -2    0.34   18.78
   4 -39  -2   -7.84   19.19
   3 -39  -2    7.61   18.93
   2 -39  -2   47.73   22.14
   1 -39  -2   65.38   19.52
   0 -39  -2   10.03   16.36
  -1 -39  -2    1.59   16.92
  -2 -39  -2   30.68   19.32
  -3 -39  -2   94.47   25.01
  -4 -39  -2   -9.75   15.26
  -5 -39  -2    8.70   17.63
  -6 -39  -2   34.79   20.83
  -7 -39  -2   38.05   19.14
  -8 -39  -2  -15.71   15.93
   9 -40  -2    7.59   23.64
   8 -40  -2   17.00   21.69
   8 -40  -2   14.36   26.04
   7 -40  -2   36.83   26.85
   6 -40  -2   -9.92   20.84
   5 -40  -2   20.66   21.90
   4 -40  -2  -10.17   17.76
   3 -40  -2  -18.16   16.33
   2 -40  -2   -2.46   17.29
   1 -40  -2    3.19   17.18
   0 -40  -2   22.94   19.61
  -1 -40  -2   -2.20   15.04
  -2 -40  -2   87.65   24.08
  -3 -40  -2   13.83   14.68
  -4 -40  -2   -5.10   14.89
  -5 -40  -2    2.36   16.95
  -6 -40  -2   31.33   20.88
  -7 -40  -2   21.25   18.91
  -8 -40  -2   -9.94   14.90
   8 -41  -2   39.65   29.73
   7 -41  -2   -8.00   23.47
   6 -41  -2   24.86   24.92
   5 -41  -2    7.64   20.01
   4 -41  -2    0.39   19.33
   3 -41  -2  -11.19   18.78
   2 -41  -2  -13.00   17.45
   1 -41  -2   43.75   21.26
   0 -41  -2   -8.94   16.67
  -1 -41  -2  -10.99   16.03
  -2 -41  -2    5.56   17.28
  -3 -41  -2   -2.65   14.60
  -4 -41  -2   27.38   18.73
  -5 -41  -2  -14.58   13.65
  -6 -41  -2   42.26   22.45
  -7 -41  -2   -5.80   15.37
   7 -42  -2   -3.02   23.55
   6 -42  -2   23.13   23.80
   5 -42  -2   13.56   22.02
   4 -42  -2   86.88   27.47
   3 -42  -2   -8.38   18.29
   2 -42  -2   35.37   21.03
   1 -42  -2   37.31   22.02
   0 -42  -2   96.88   24.75
  -1 -42  -2   -6.72   17.99
  -2 -42  -2  -11.78   14.89
  -3 -42  -2    2.84   17.52
  -4 -42  -2   -1.47   18.29
  -5 -42  -2  -10.15   15.46
  -6 -42  -2    2.28   19.17
   6 -43  -2    0.72   22.72
   5 -43  -2  -19.66   22.82
   4 -43  -2   14.58   19.54
   3 -43  -2  -10.55   20.39
   2 -43  -2   -9.54   20.01
   1 -43  -2   33.83   21.49
   0 -43  -2   18.40   19.83
  -1 -43  -2   -3.01   18.83
  -2 -43  -2  -20.40   16.99
  -3 -43  -2  -15.97   15.47
  -4 -43  -2   21.98   20.63
  -5 -43  -2   11.28   18.85
   5 -44  -2   43.23   26.61
   4 -44  -2  -17.12   19.78
   3 -44  -2  -25.83   17.46
   2 -44  -2   11.95   19.32
   1 -44  -2   18.28   21.28
   0 -44  -2   39.76   21.84
  -1 -44  -2   -5.08   15.86
  -2 -44  -2  -16.82   17.76
  -3 -44  -2   12.57   20.33
  -4 -44  -2    3.37   17.77
   3 -45  -2   17.04   23.55
   2 -45  -2   -2.07   20.07
   1 -45  -2   79.47   28.27
   0 -45  -2  -14.17   17.38
  -1 -45  -2   -8.31   18.38
  -2 -45  -2  -13.73   17.62
  -3 -45   3  -15.26   16.22
  -2 -45   3   -3.76   19.15
  -1 -45   3  -10.59   19.43
   0 -45   3   22.97   21.47
   1 -45   3   -9.73   20.98
  -4 -44   3   15.89   19.49
  -3 -44   3   -6.26   16.95
  -2 -44   3   -1.57   18.57
  -1 -44   3   -1.67   16.66
   0 -44   3   73.70   27.62
   1 -44   3  -10.25   18.75
   2 -44   3   12.03   21.18
   3 -44   3    5.77   21.27
  -6 -43   3   -8.65   16.92
  -5 -43   3    1.82   18.37
  -4 -43   3   -3.80   16.77
  -3 -43   3   11.51   17.81
  -2 -43   3    0.50   18.40
  -1 -43   3   45.54   22.60
   0 -43   3  -13.74   17.31
   1 -43   3  -13.54   19.45
   2 -43   3    8.25   17.50
   3 -43   3   -2.81   20.45
  -7 -42   3   -1.13   16.07
  -6 -42   3  -13.02   15.38
  -5 -42   3   13.53   19.03
  -4 -42   3   -7.49   16.16
  -3 -42   3  -11.95   15.84
  -2 -42   3  -17.69   16.36
  -1 -42   3   -7.82   16.54
   0 -42   3  -14.71   16.11
   1 -42   3  -22.93   16.87
   2 -42   3    2.96   18.13
   3 -42   3   13.42   22.49
  -8 -41   3   -6.58   16.92
  -7 -41   3  -14.01   13.87
  -6 -41   3  -35.68   13.86
  -5 -41   3  -15.26   16.59
  -4 -41   3    0.06   16.80
  -3 -41   3    7.80   16.96
  -2 -41   3  -14.23   16.40
  -1 -41   3   59.34   23.19
   0 -41   3   -7.97   17.47
   1 -41   3   21.61   19.51
   2 -41   3   33.18   23.13
   3 -41   3   15.91   21.11
   4 -41   3    1.09   20.11
  -9 -40   3   -9.04   16.97
  -8 -40   3   -3.12   16.90
  -7 -40   3    1.47   17.09
  -6 -40   3    0.52   16.54
  -5 -40   3   -9.58   15.28
  -4 -40   3   -9.78   15.85
  -3 -40   3    4.64   16.45
  -2 -40   3    7.38   17.07
  -1 -40   3    5.91   17.88
   0 -40   3   19.85   18.05
   1 -40   3   -3.10   16.87
   2 -40   3   -0.12   18.00
   3 -40   3   -4.36   16.48
   4 -40   3   -7.25   20.39
   7 -40   3   83.66   28.61
  -9 -39   3   -4.31   13.89
  -8 -39   3   17.95   18.19
  -7 -39   3  -11.39   16.04
  -6 -39   3  -11.34   14.17
  -5 -39   3   14.53   16.54
  -4 -39   3    5.24   15.76
  -3 -39   3    5.35   14.97
  -2 -39   3   27.38   18.65
  -1 -39   3   -6.06   16.39
   0 -39   3  -16.23   14.99
   1 -39   3  -31.80   14.05
   2 -39   3   27.09   18.93
   3 -39   3   27.28   19.55
   4 -39   3  -22.23   17.67
   6 -39   3   61.77   25.83
   7 -39   3   16.48   22.46
   8 -39   3   68.92   27.91
 -10 -38   3   -7.69   17.41
  -9 -38   3  -14.81   14.68
  -8 -38   3   26.29   16.20
  -7 -38   3  -18.70   13.87
  -6 -38   3   -4.03   12.39
  -5 -38   3   -8.77   10.94
  -4 -38   3   47.20   19.74
  -3 -38   3   -9.43   14.55
  -2 -38   3    4.26   15.51
  -1 -38   3   -8.48   15.13
   0 -38   3   -4.22   15.55
   1 -38   3   -9.46   16.36
   2 -38   3   93.29   25.55
   3 -38   3   11.92   18.45
   4 -38   3    8.16   20.72
   6 -38   3   83.02   25.75
   7 -38   3    6.67   20.71
   8 -38   3    9.58   22.65
   9 -38   3   32.46   26.62
 -11 -37   3    4.54   17.53
 -10 -37   3  -19.16   16.89
  -9 -37   3   -6.06   17.01
  -8 -37   3   28.22   18.44
  -7 -37   3   12.01   16.37
  -6 -37   3    4.00   14.15
  -5 -37   3    1.55   14.98
  -4 -37   3   -0.01   13.32
  -3 -37   3   -5.14   14.37
  -2 -37   3   62.99   20.09
  -1 -37   3   24.50   17.14
   0 -37   3    2.17   14.82
   1 -37   3   -8.21   15.25
   2 -37   3    7.44   17.60
   3 -37   3  164.00   31.36
   4 -37   3   -1.08   18.05
   5 -37   3   18.09   19.68
   6 -37   3  115.17   28.29
   7 -37   3   20.53   21.35
   8 -37   3   31.77   23.42
   9 -37   3    7.66   22.05
 -11 -36   3   47.50   23.19
 -10 -36   3   -3.20   17.34
  -9 -36   3   27.65   19.25
  -8 -36   3   12.63   17.40
  -7 -36   3   30.19   16.79
  -6 -36   3  -12.01   14.26
  -5 -36   3   77.94   21.51
  -4 -36   3    2.26   12.88
  -3 -36   3   11.75   15.21
  -2 -36   3   14.41   16.27
  -1 -36   3  105.58   24.14
   0 -36   3   61.23   21.50
   1 -36   3  -18.19   14.25
   2 -36   3    2.77   15.97
   4 -36   3   -7.51   16.37
   4 -36   3  -21.30   15.75
   5 -36   3    9.56   19.67
   5 -36   3    9.76   16.59
   6 -36   3   32.38   21.85
   7 -36   3  238.76   38.02
   8 -36   3    4.27   20.48
   9 -36   3   37.96   24.01
  10 -36   3  -11.34   21.55
 -12 -35   3   52.61   21.39
 -11 -35   3   21.71   20.69
 -10 -35   3   -5.48   15.56
  -9 -35   3  -10.24   11.15
  -8 -35   3    1.41   15.37
  -7 -35   3   30.00   18.89
  -6 -35   3   -7.60   14.17
  -5 -35   3   34.17   17.49
  -4 -35   3    1.28   13.46
  -3 -35   3  118.14   23.19
  -2 -35   3   39.33   17.60
  -1 -35   3  213.25   25.29
   0 -35   3  -21.00   14.07
   1 -35   3   -6.32   14.02
   2 -35   3   39.98   19.83
   3 -35   3  242.03   34.85
   4 -35   3   17.49   18.38
   4 -35   3    3.56   16.05
   5 -35   3  -11.46   15.80
   5 -35   3   12.66   18.14
   6 -35   3   20.98   19.75
   7 -35   3    8.46   19.76
   8 -35   3   -6.31   18.61
   9 -35   3   -2.09   19.28
  10 -35   3   34.94   26.63
 -12 -34   3   59.38   26.26
 -11 -34   3  -21.95   15.52
 -10 -34   3   -0.84   16.53
  -9 -34   3   34.47   18.86
  -8 -34   3   23.44   15.34
  -7 -34   3  107.28   23.67
  -6 -34   3    9.52   14.03
  -5 -34   3  110.09   22.83
  -4 -34   3  156.42   26.16
  -3 -34   3   59.70   18.78
  -2 -34   3   37.74   17.06
  -1 -34   3   23.45   15.75
   0 -34   3    7.43   15.38
   1 -34   3    7.05   15.03
   2 -34   3  203.22   30.74
   3 -34   3  175.70   28.25
   3 -34   3  113.76   25.73
   4 -34   3   20.79   17.72
   4 -34   3   10.01   17.61
   5 -34   3   69.02   24.27
   5 -34   3   52.56   22.29
   6 -34   3   44.26   21.07
   7 -34   3   -6.05   18.56
   8 -34   3   16.60   20.65
   9 -34   3    0.48   21.08
  10 -34   3   -1.38   21.19
  11 -34   3  -12.05   21.42
 -13 -33   3   -8.36   16.64
 -12 -33   3   17.28   21.97
 -11 -33   3    3.32   18.48
 -10 -33   3    8.87   19.13
  -9 -33   3   21.44   19.52
  -8 -33   3  100.29   23.29
  -7 -33   3   18.58   15.55
  -6 -33   3  161.28   26.16
  -5 -33   3   41.60   15.19
  -4 -33   3  111.63   22.64
  -3 -33   3   -8.38   12.13
  -2 -33   3  192.39   27.30
  -1 -33   3  129.77   23.77
   0 -33   3   76.36   19.92
   1 -33   3   71.31   21.30
   2 -33   3   18.59   15.16
   3 -33   3   77.38   23.26
   3 -33   3  126.88   25.26
   4 -33   3   57.09   22.12
   4 -33   3   73.83   21.07
   5 -33   3   11.97   17.18
   5 -33   3   -5.58   15.66
   6 -33   3   81.56   24.31
   7 -33   3   -3.25   16.55
   8 -33   3   70.65   25.87
   9 -33   3   18.15   21.21
  10 -33   3   11.18   23.00
  11 -33   3  -18.88   20.19
 -13 -32   3  -29.40   16.77
 -12 -32   3   22.00   19.28
 -11 -32   3   -9.99   17.45
 -10 -32   3   27.23   18.88
  -9 -32   3    8.03   16.34
  -8 -32   3   68.60   21.28
  -7 -32   3  -10.17   12.23
  -6 -32   3   38.42   17.25
  -5 -32   3   66.25   19.52
  -4 -32   3  130.54   23.58
  -3 -32   3   -7.95    9.69
  -2 -32   3  170.59   25.41
  -1 -32   3   38.21   16.36
   0 -32   3  499.65   38.90
   1 -32   3   -1.78   12.68
   2 -32   3   82.72   20.00
   2 -32   3  110.80   22.98
   3 -32   3    4.14   13.66
   3 -32   3   -4.41   14.49
   4 -32   3   24.23   17.97
   4 -32   3   36.71   18.02
   5 -32   3   -5.01   15.95
   5 -32   3    8.81   16.82
   6 -32   3   12.61   16.05
   7 -32   3   35.15   21.05
   8 -32   3   30.73   22.62
   9 -32   3  -13.55   17.47
  10 -32   3  -10.29   19.97
  11 -32   3   16.56   22.84
  12 -32   3   10.11   23.33
 -13 -31   3   35.76   24.24
 -12 -31   3   -4.96   17.80
 -11 -31   3   13.95   18.22
 -10 -31   3  190.42   31.17
  -9 -31   3  113.42   25.51
  -8 -31   3   12.98   13.78
  -7 -31   3   15.75   15.55
  -5 -31   3  100.08   21.30
  -4 -31   3   72.78   17.05
  -3 -31   3  155.78   24.27
  -2 -31   3   13.49   12.73
  -1 -31   3  192.88   22.05
   0 -31   3   47.91   16.99
   1 -31   3   62.63   19.35
   2 -31   3   56.54   18.48
   2 -31   3   38.88   17.06
   3 -31   3   79.88   22.22
   3 -31   3   81.80   20.74
   4 -31   3  252.44   28.93
   4 -31   3  226.47   31.63
   5 -31   3    9.47   15.47
   5 -31   3    5.90   16.15
   6 -31   3   25.07   17.82
   7 -31   3   54.00   20.82
   8 -31   3   41.39   22.10
   9 -31   3   -7.00   18.84
  10 -31   3   21.48   22.65
  11 -31   3   -3.17   21.99
  12 -31   3    3.47   23.41
 -14 -30   3   23.32   22.69
 -13 -30   3   -7.19   17.72
 -12 -30   3  -22.50   17.03
 -11 -30   3   93.72   25.96
 -10 -30   3    6.45   18.25
  -9 -30   3  110.48   24.56
  -8 -30   3  -21.03   12.70
  -7 -30   3  217.83   29.90
  -6 -30   3   -3.88   10.18
  -4 -30   3   21.44   15.48
  -3 -30   3   35.01   15.15
  -2 -30   3    9.35   11.00
  -1 -30   3   14.53   13.62
   0 -30   3  104.88   20.52
   1 -30   3   24.56   15.34
   1 -30   3   27.35   14.71
   2 -30   3  -11.21   12.14
   2 -30   3  -18.21   11.23
   3 -30   3  197.14   28.55
   3 -30   3  170.45   27.35
   4 -30   3   90.33   23.42
   4 -30   3  121.24   24.73
   5 -30   3  219.88   32.71
   5 -30   3  269.76   34.68
   6 -30   3   -9.33   15.98
   6 -30   3  -13.03   13.47
   7 -30   3  128.53   28.63
   8 -30   3   14.77   19.10
   9 -30   3  108.80   29.28
  10 -30   3   16.51   21.88
  11 -30   3   14.96   21.49
  12 -30   3   14.36   23.81
 -14 -29   3    7.31   20.34
 -13 -29   3   71.77   25.03
 -12 -29   3    1.24   16.52
 -11 -29   3   57.41   22.98
 -10 -29   3    2.02   12.99
  -9 -29   3    5.08   13.81
  -8 -29   3    0.59   15.12
  -7 -29   3  -10.33   12.35
  -6 -29   3   43.78   17.62
  -5 -29   3   69.90   18.82
  -4 -29   3   34.32   15.98
  -3 -29   3  205.49   22.27
  -2 -29   3    4.89   12.26
  -1 -29   3  185.74   20.67
   0 -29   3   41.58   14.59
   1 -29   3  343.75   30.29
   1 -29   3  335.36   29.46
   2 -29   3   71.58   18.45
   2 -29   3   50.75   17.22
   3 -29   3   41.59   16.69
   3 -29   3   43.84   18.29
   4 -29   3   68.43   20.97
   4 -29   3  132.30   24.40
   5 -29   3  219.71   32.27
   5 -29   3  219.78   26.02
   6 -29   3   -3.12   14.79
   6 -29   3   -0.92   16.02
   7 -29   3   10.48   15.98
   8 -29   3   -4.63   16.85
   9 -29   3   48.67   23.91
  10 -29   3   -1.55   19.56
  11 -29   3    3.40   19.45
  12 -29   3   -3.76   19.70
  13 -29   3  114.61   33.79
 -14 -28   3   37.11   22.24
 -13 -28   3   11.30   19.79
 -12 -28   3   11.78   18.23
 -11 -28   3   57.05   19.52
 -10 -28   3   19.13   18.66
  -9 -28   3  131.63   25.84
  -8 -28   3   22.63   16.38
  -7 -28   3   61.45   18.64
  -6 -28   3   43.90   16.70
  -5 -28   3    0.32   13.18
  -4 -28   3  177.87   20.82
  -3 -28   3   68.76   17.08
  -2 -28   3   77.83   17.96
  -1 -28   3   17.48   12.81
   0 -28   3  291.33   26.10
   0 -28   3  288.32   25.81
   1 -28   3   10.28   12.59
   1 -28   3   22.51   13.31
   2 -28   3   98.66   20.10
   2 -28   3  132.14   22.79
   3 -28   3  153.06   24.54
   3 -28   3  140.36   24.09
   4 -28   3  134.59   24.72
   4 -28   3  149.60   24.81
   5 -28   3  233.35   31.47
   5 -28   3  172.73   28.98
   6 -28   3   19.32   18.88
   6 -28   3   37.21   17.68
   7 -28   3    9.65   16.06
   8 -28   3   21.02   18.74
   9 -28   3   78.90   24.94
  10 -28   3   18.80   20.16
  11 -28   3   42.68   24.14
  12 -28   3   12.40   23.26
  13 -28   3    5.35   22.32
 -15 -27   3   17.30   22.84
 -14 -27   3   -8.17   16.26
 -13 -27   3  -18.86   15.61
 -12 -27   3   73.01   21.94
 -11 -27   3   23.15   18.31
 -10 -27   3  290.82   28.96
  -9 -27   3   36.00   14.31
  -8 -27   3  239.83   26.11
  -7 -27   3   -1.03   12.61
  -6 -27   3  283.32   27.21
  -5 -27   3   -3.60    9.50
  -4 -27   3   96.70   19.83
  -3 -27   3   42.63   14.61
  -2 -27   3    6.15   10.92
  -1 -27   3   89.71   17.73
   0 -27   3    8.89   10.23
   0 -27   3    2.22   10.66
   1 -27   3   67.19   17.70
   1 -27   3   60.64   15.95
   2 -27   3   47.44   15.66
   2 -27   3   39.43   15.05
   3 -27   3   92.31   19.68
   3 -27   3   81.22   19.61
   4 -27   3  166.55   26.33
   4 -27   3  175.41   25.95
   5 -27   3  156.82   26.84
   5 -27   3  177.79   27.07
   6 -27   3  148.45   26.60
   6 -27   3  139.19   27.60
   7 -27   3   94.97   24.77
   8 -27   3  246.07   36.13
   9 -27   3   39.52   20.85
  10 -27   3  175.28   34.43
  11 -27   3    5.81   19.22
  12 -27   3   28.51   22.46
  13 -27   3   23.99   25.92
 -15 -26   3    5.99   18.64
 -14 -26   3  108.70   27.32
 -13 -26   3    3.42   17.81
 -12 -26   3   47.58   21.02
 -11 -26   3   29.62   16.05
 -10 -26   3   28.41   18.08
  -9 -26   3   80.10   21.04
  -8 -26   3   22.11   14.60
  -7 -26   3   15.96   13.96
  -6 -26   3  177.74   25.19
  -5 -26   3  176.22   20.78
  -4 -26   3   -0.57   11.21
  -3 -26   3   -0.71    9.80
  -2 -26   3   76.93   16.72
  -1 -26   3   14.13   11.49
  -1 -26   3    1.10    9.00
   0 -26   3  149.66   17.84
   0 -26   3  153.76   17.80
   1 -26   3   28.57   12.15
   1 -26   3   60.12   15.54
   2 -26   3  569.57   40.31
   2 -26   3  572.64   42.29
   3 -26   3   63.75   17.21
   3 -26   3   38.91   14.86
   4 -26   3  126.25   23.51
   4 -26   3  131.44   22.06
   5 -26   3   27.57   14.83
   5 -26   3   20.97   15.14
   6 -26   3   50.96   18.49
   6 -26   3   32.17   17.14
   7 -26   3   13.78   17.05
   8 -26   3    1.03   14.85
   9 -26   3   59.13   22.55
  10 -26   3    4.97   17.68
  11 -26   3   -8.29   18.47
  12 -26   3  108.79   31.36
  13 -26   3   29.72   24.22
  14 -26   3   33.65   25.88
 -15 -25   3  204.37   34.36
 -14 -25   3  -19.73   16.77
 -13 -25   3   93.21   24.59
 -12 -25   3   25.80   18.01
 -11 -25   3   57.66   20.08
 -10 -25   3  120.09   21.05
  -9 -25   3   13.78   13.70
  -8 -25   3  211.81   23.23
  -7 -25   3   79.99   18.81
  -6 -25   3  251.98   24.96
  -5 -25   3  155.51   17.96
  -4 -25   3   59.62   15.39
  -3 -25   3    3.91    9.44
  -2 -25   3   -1.54    7.30
  -1 -25   3  232.39   20.81
  -1 -25   3  208.77   20.58
   0 -25   3    0.63    9.77
   0 -25   3   -8.75    8.46
   1 -25   3  349.42   27.43
   1 -25   3  315.14   28.27
   2 -25   3  176.67   23.63
   2 -25   3  174.16   24.51
   3 -25   3  181.72   24.84
   3 -25   3  212.03   27.93
   4 -25   3    9.78   11.66
   4 -25   3    9.79   12.49
   5 -25   3  322.85   28.03
   5 -25   3  287.64   30.22
   6 -25   3  113.47   21.71
   6 -25   3  127.66   24.26
   7 -25   3   40.53   19.27
   8 -25   3   55.64   21.76
   9 -25   3   10.43   16.34
  10 -25   3   15.86   17.53
  11 -25   3   26.67   21.71
  12 -25   3   35.94   23.64
  13 -25   3   48.02   26.84
  14 -25   3   -0.26   23.19
 -16 -24   3   11.47   21.67
 -15 -24   3    9.75   19.20
 -14 -24   3  -15.20   15.06
 -13 -24   3  120.35   27.00
 -12 -24   3   35.49   19.20
 -11 -24   3  189.33   28.23
 -10 -24   3   -0.18   15.50
  -9 -24   3  288.64   28.05
  -8 -24   3   21.49   14.69
  -7 -24   3  372.27   30.38
  -6 -24   3   79.43   15.81
  -5 -24   3  184.12   20.26
  -4 -24   3   -9.34    8.87
  -3 -24   3  140.66   19.98
  -2 -24   3  187.43   19.42
  -2 -24   3  222.34   19.03
  -1 -24   3   39.20   12.63
  -1 -24   3   82.43   14.55
   0 -24   3   37.74   12.64
   0 -24   3   32.11   12.17
   1 -24   3  395.50   31.45
   1 -24   3  401.77   29.83
   2 -24   3  160.48   22.89
   2 -24   3  161.94   22.77
   3 -24   3   32.54   14.02
   3 -24   3   22.39   13.30
   4 -24   3   31.00   13.93
   4 -24   3    7.50   11.37
   5 -24   3  736.52   53.88
   5 -24   3  737.13   48.84
   6 -24   3  165.64   25.26
   6 -24   3  185.75   28.11
   7 -24   3  325.69   33.34
   8 -24   3   38.03   20.63
   9 -24   3  127.29   27.79
  10 -24   3   10.63   17.13
  11 -24   3  174.25   34.14
  12 -24   3   11.19   19.76
  13 -24   3  -15.79   19.15
  14 -24   3    4.41   23.14
 -16 -23   3   -2.64   19.46
 -15 -23   3   88.94   25.46
 -14 -23   3   -6.64   16.57
 -13 -23   3   98.29   24.15
 -12 -23   3   42.93   18.67
 -11 -23   3  457.00   38.09
 -10 -23   3   47.54   17.71
  -9 -23   3   88.82   20.53
  -8 -23   3  213.10   27.92
  -7 -23   3   -9.30   10.91
  -6 -23   3   26.97   13.45
  -5 -23   3   65.73   15.89
  -4 -23   3   12.82   10.88
  -3 -23   3  658.75   42.88
  -2 -23   3    6.50    9.35
  -2 -23   3   10.23    8.52
  -1 -23   3  248.33   21.57
  -1 -23   3  261.98   21.94
   0 -23   3  101.23   16.60
   0 -23   3   98.99   16.66
   1 -23   3  782.59   51.18
   1 -23   3  756.57   47.41
   2 -23   3   47.68   15.08
   2 -23   3   66.04   15.06
   3 -23   3  368.19   31.40
   3 -23   3  363.21   28.82
   4 -23   3    4.92   12.38
   4 -23   3   -3.65    9.60
   5 -23   3  139.90   21.22
   5 -23   3   78.37   19.18
   6 -23   3  195.13   25.81
   6 -23   3  167.28   27.56
   7 -23   3   43.79   18.62
   8 -23   3  148.28   27.89
   9 -23   3   11.50   17.02
  10 -23   3   43.36   21.46
  11 -23   3   72.46   24.52
  12 -23   3   12.99   21.24
  13 -23   3   33.55   23.48
  14 -23   3    7.66   25.13
 -15 -22   3    4.64   18.71
 -14 -22   3   75.46   22.56
 -13 -22   3   26.26   18.37
 -12 -22   3   96.54   23.10
 -11 -22   3   69.51   20.26
 -10 -22   3  182.65   27.50
  -9 -22   3   49.41   14.91
  -8 -22   3  205.11   26.90
  -7 -22   3  347.62   29.28
  -6 -22   3   62.11   15.69
  -5 -22   3  126.00   19.50
  -4 -22   3   25.91   11.44
  -3 -22   3  563.32   37.76
  -2 -22   3  366.78   27.65
  -2 -22   3  361.60   26.24
  -1 -22   3   -5.81    7.02
  -1 -22   3    8.81    9.24
   0 -22   3  393.06   28.78
   0 -22   3  347.36   26.70
   1 -22   3  430.76   32.89
   1 -22   3  447.92   31.09
   2 -22   3  784.57   46.83
   2 -22   3  675.84   48.83
   3 -22   3   90.79   17.57
   3 -22   3   63.89   15.96
   4 -22   3  161.07   18.31
   4 -22   3  195.47   25.96
   5 -22   3  491.42   40.72
   5 -22   3  528.19   36.74
   6 -22   3    7.59   13.52
   6 -22   3   33.06   13.50
   7 -22   3   58.12   19.97
   8 -22   3   -7.12   13.55
   9 -22   3   -9.26   15.21
  10 -22   3   96.42   25.05
  11 -22   3   -3.50   17.18
  12 -22   3   38.32   23.84
  13 -22   3   -9.45   19.85
  14 -22   3   32.42   25.67
  15 -22   3   -7.23   22.38
 -16 -21   3   29.84   20.00
 -15 -21   3  -13.12   16.58
 -14 -21   3   -1.22   15.53
 -13 -21   3  -21.76   13.58
 -12 -21   3   43.01   17.33
 -11 -21   3   12.29   13.90
 -10 -21   3  528.60   40.64
  -9 -21   3    4.97   13.11
  -8 -21   3  323.28   28.53
  -7 -21   3   77.24   17.15
  -6 -21   3 1145.77   67.73
  -5 -21   3    9.96   10.14
  -4 -21   3  173.67   18.04
  -3 -21   3  205.39   19.42
  -3 -21   3  188.05   16.42
  -2 -21   3  198.91   19.78
  -2 -21   3  236.77   18.83
  -1 -21   3    1.97    7.18
  -1 -21   3   -2.08    7.73
   0 -21   3  118.99   16.36
   0 -21   3  112.09   14.22
   1 -21   3  130.31   15.25
   1 -21   3  146.00   19.51
   2 -21   3  880.73   58.28
   2 -21   3  937.96   54.45
   3 -21   3   37.41   13.93
   3 -21   3   59.16   14.36
   4 -21   3  199.09   22.09
   4 -21   3  197.70   20.09
   5 -21   3  142.85   23.80
   5 -21   3  155.11   18.06
   6 -21   3  690.42   44.76
   6 -21   3  653.81   50.05
   7 -21   3   82.45   17.76
   7 -21   3   60.73   19.77
   8 -21   3  213.50   27.01
   9 -21   3   -7.04   15.77
  10 -21   3    8.31   17.48
  11 -21   3   20.76   19.21
  12 -21   3  112.26   29.47
  13 -21   3  -14.53   18.68
  14 -21   3   -3.95   18.54
  15 -21   3   -5.71   22.70
 -15 -20   3   17.03   18.83
 -14 -20   3  165.85   29.17
 -13 -20   3    8.96   17.17
 -12 -20   3  141.24   25.75
 -11 -20   3   28.56   15.54
 -10 -20   3  447.39   36.23
  -9 -20   3  167.09   25.39
  -8 -20   3   51.81   16.36
  -7 -20   3  412.32   31.34
  -6 -20   3   37.77   11.85
  -5 -20   3   -8.09    8.96
  -4 -20   3  137.11   18.87
  -3 -20   3   47.96    9.81
  -3 -20   3   48.01   13.21
  -2 -20   3 1795.88   97.30
  -2 -20   3 1826.48  101.15
  -1 -20   3  126.70   13.67
  -1 -20   3  109.92   12.85
   0 -20   3 1185.19   67.72
   0 -20   3 1260.21   72.65
   1 -20   3  648.86   39.90
   1 -20   3  629.93   42.98
   2 -20   3  849.91   56.34
   2 -20   3  899.62   52.30
   3 -20   3   38.34   12.39
   3 -20   3   26.48   11.81
   4 -20   3  128.44   21.12
   4 -20   3  142.45   19.12
   5 -20   3  389.41   34.12
   5 -20   3  403.50   29.99
   6 -20   3  228.92   22.00
   6 -20   3  233.90   25.83
   7 -20   3   54.49   14.88
   7 -20   3   45.85   17.68
   8 -20   3   -2.67   12.29
   9 -20   3   23.81   16.54
  10 -20   3   41.13   19.01
  11 -20   3   29.36   18.75
  12 -20   3   44.59   23.89
  13 -20   3   -4.03   19.56
  14 -20   3   -7.78   21.92
  15 -20   3   -2.95   20.82
 -15 -19   3   16.44   19.08
 -14 -19   3   -7.40   15.39
 -13 -19   3  139.64   26.66
 -12 -19   3   -9.84   13.10
 -11 -19   3  530.71   40.71
 -10 -19   3  124.68   22.92
  -9 -19   3   19.03   14.66
  -8 -19   3  105.64   19.80
  -7 -19   3   43.27   14.14
  -6 -19   3  259.85   23.22
  -5 -19   3   79.40   15.86
  -4 -19   3  662.17   41.63
  -4 -19   3  644.26   38.37
  -3 -19   3 1352.52   74.88
  -3 -19   3 1336.41   75.46
  -2 -19   3    8.05    8.67
  -2 -19   3    5.73    7.47
  -1 -19   3  960.66   53.07
  -1 -19   3  856.59   54.27
   0 -19   3    6.11    8.03
   0 -19   3   10.89    8.29
   1 -19   3 1431.13   75.98
   1 -19   3 1348.19   81.58
   2 -19   3  352.67   25.26
   2 -19   3  320.13   27.12
   3 -19   3  183.31   19.74
   3 -19   3  179.30   17.88
   4 -19   3  272.35   23.57
   4 -19   3  339.50   28.55
   5 -19   3    5.66   11.55
   5 -19   3   22.22   10.32
   6 -19   3   23.15   13.60
   6 -19   3    4.10   10.71
   7 -19   3   -5.07    9.45
   7 -19   3    1.28   11.17
   8 -19   3  199.14   25.45
   9 -19   3   52.32   21.09
  10 -19   3   -5.03   13.68
  11 -19   3   47.40   21.30
  12 -19   3   -3.42   16.26
  13 -19   3   18.25   21.64
  14 -19   3   -2.06   19.74
  15 -19   3   45.81   28.49
 -15 -18   3   -7.96   15.67
 -14 -18   3   26.76   19.00
 -13 -18   3  109.67   23.73
 -12 -18   3  -20.87   11.19
 -11 -18   3   45.51   17.47
 -10 -18   3   47.47   16.42
  -9 -18   3  540.77   39.60
  -8 -18   3    4.27   11.65
  -7 -18   3 1126.95   66.57
  -6 -18   3   53.79   13.10
  -5 -18   3  403.83   29.64
  -4 -18   3    0.22    4.99
  -4 -18   3    0.45    7.92
  -3 -18   3 1341.84   77.21
  -3 -18   3 1479.14   78.88
  -2 -18   3   -0.13    6.91
  -2 -18   3    1.25    8.04
  -1 -18   3   20.41    8.44
  -1 -18   3   11.89    7.96
   0 -18   3   25.29    8.90
   0 -18   3   31.69    9.62
   1 -18   3  559.58   38.57
   1 -18   3  589.60   35.70
   2 -18   3  295.65   21.70
   2 -18   3  251.55   23.60
   3 -18   3  506.92   36.94
   3 -18   3  500.48   33.29
   4 -18   3    2.73    9.91
   4 -18   3    4.69    7.94
   5 -18   3 1186.09   77.39
   5 -18   3 1273.88   69.79
   6 -18   3  197.51   19.34
   6 -18   3  205.19   23.49
   7 -18   3  154.26   24.74
   7 -18   3  159.62   17.11
   8 -18   3   16.50   14.27
   9 -18   3  169.12   28.80
  10 -18   3   41.96   20.25
  11 -18   3   62.87   22.29
  12 -18   3   -5.06   16.93
  13 -18   3    2.81   21.84
  14 -18   3   26.63   22.30
  15 -18   3   22.35   25.40
 -15 -17   3  156.68   28.60
 -14 -17   3  -25.20   14.08
 -13 -17   3   94.61   22.84
 -12 -17   3    6.11   13.60
 -11 -17   3  186.97   22.04
 -10 -17   3  259.21   25.94
  -9 -17   3  -12.96   11.60
  -8 -17   3  207.86   21.41
  -7 -17   3   21.30   10.27
  -6 -17   3 1154.28   66.69
  -5 -17   3  255.18   21.82
  -4 -17   3  197.04   17.98
  -4 -17   3  183.87   13.86
  -3 -17   3  387.40   25.27
  -3 -17   3  397.61   27.62
  -2 -17   3   56.23   10.42
  -2 -17   3   56.03   12.03
  -1 -17   3  715.78   44.29
  -1 -17   3  729.48   42.84
   0 -17   3  219.27   19.29
   0 -17   3  240.55   18.44
   1 -17   3 1062.86   61.05
   1 -17   3 1167.26   67.09
   2 -17   3  552.73   39.24
   2 -17   3  604.43   36.18
   3 -17   3    5.57    7.95
   3 -17   3    9.54    8.05
   4 -17   3   75.01   13.52
   4 -17   3   80.27   16.33
   5 -17   3  100.91   19.33
   5 -17   3  125.55   16.92
   6 -17   3  193.58   26.70
   6 -17   3  206.25   18.90
   7 -17   3    5.77   10.94
   7 -17   3    0.06    8.88
   8 -17   3   13.55   11.73
   9 -17   3   16.07   15.52
  10 -17   3   -2.77   14.25
  11 -17   3   -2.66   13.86
  12 -17   3   32.10   20.18
  13 -17   3  123.40   30.08
  14 -17   3   -7.29   17.55
  15 -17   3   11.96   22.61
  16 -17   3  -20.40   23.29
 -15 -16   3   59.19   21.20
 -14 -16   3  197.24   30.75
 -13 -16   3    6.66   16.11
 -12 -16   3   95.02   21.40
 -11 -16   3  186.05   26.50
 -10 -16   3  210.04   27.78
  -9 -16   3  111.84   20.54
  -8 -16   3  205.86   20.88
  -7 -16   3   22.97   11.84
  -6 -16   3  400.44   29.54
  -5 -16   3   48.01    5.90
  -5 -16   3   34.98   11.26
  -4 -16   3   63.53    7.38
  -4 -16   3   56.85   12.43
  -3 -16   3   77.22   13.31
  -3 -16   3   71.59    8.50
  -2 -16   3 3828.99  196.90
  -2 -16   3 3973.63  208.97
  -1 -16   3   87.23   11.77
  -1 -16   3   88.20   13.04
   0 -16   3 3138.97  167.09
   0 -16   3 2976.86  155.10
   1 -16   3   25.06    9.57
   2 -16   3  452.60   33.10
   2 -16   3  484.62   30.00
   3 -16   3    0.04    6.56
   3 -16   3   -7.35    6.79
   4 -16   3  571.48   42.03
   4 -16   3  625.98   37.51
   5 -16   3   -5.46    8.97
   5 -16   3    8.62    8.33
   6 -16   3  329.80   24.66
  -6  16  -3  329.20   23.03
   6 -16   3  348.80   30.84
   7 -16   3   25.00   11.08
   7 -16   3   62.54   16.85
   8 -16   3   32.18   15.10
   9 -16   3  581.05   47.13
  10 -16   3   29.12   17.85
  11 -16   3  -10.49   13.14
  12 -16   3  175.30   31.56
  13 -16   3   15.83   21.35
  14 -16   3  -21.12   17.61
  15 -16   3    0.42   21.09
  16 -16   3   21.38   28.21
 -15 -15   3   15.59   16.85
 -14 -15   3   78.23   21.74
 -13 -15   3  -14.73   10.98
 -12 -15   3   80.48   20.17
 -11 -15   3  102.43   20.76
 -10 -15   3  995.24   62.05
  -9 -15   3   20.15   12.78
  -8 -15   3  281.20   24.53
  -7 -15   3   35.22   12.16
  -6 -15   3  663.30   42.24
  -5 -15   3    2.78    6.53
  -5 -15   3    1.73    4.19
  -4 -15   3  478.66   28.84
  -4 -15   3  496.93   32.25
  -3 -15   3  515.40   33.31
  -3 -15   3  535.61   31.61
  -2 -15   3    1.87    6.66
  -2 -15   3    3.48    5.50
  -1 -15   3   79.39    9.91
  -1 -15   3   93.53   11.30
   0 -15   3  501.14   32.11
   0 -15   3  565.70   35.02
   1 -15   3  714.86   39.54
   1 -15   3  643.92   43.09
   2 -15   3  955.33   52.49
   2 -15   3  927.56   57.89
   3 -15   3    1.72    6.07
   3 -15   3    3.27    7.96
   4 -15   3  214.31   18.16
   4 -15   3  270.86   23.45
   5 -15   3  177.53   19.26
  -5  15  -3  170.33   14.43
   5 -15   3  158.28   15.37
   6 -15   3  197.61   18.08
  -6  15  -3  233.26   17.28
   6 -15   3  219.15   23.83
   7 -15   3   50.21   12.65
  -7  15  -3   70.68   11.54
   7 -15   3   65.66   17.66
   8 -15   3  818.80   58.29
   9 -15   3   59.80   18.71
  10 -15   3  228.30   32.85
  11 -15   3  -24.30   11.23
  12 -15   3   90.68   24.71
  13 -15   3   -1.53   17.20
  14 -15   3   14.02   19.46
  15 -15   3   41.46   23.49
  16 -15   3   29.34   26.21
 -15 -14   3   14.16   17.89
 -14 -14   3  313.14   31.00
 -13 -14   3   65.33   19.13
 -12 -14   3   97.62   21.32
 -11 -14   3   21.33   14.27
 -10 -14   3   11.69   12.81
  -9 -14   3  520.10   37.37
  -8 -14   3    6.03    8.06
  -7 -14   3  278.23   23.22
  -6 -14   3  391.39   22.77
  -6 -14   3  361.61   26.94
  -5 -14   3  356.89   26.01
  -5 -14   3  353.16   21.60
  -4 -14   3  444.51   26.02
  -4 -14   3  423.18   29.02
  -3 -14   3  254.68   19.21
  -3 -14   3  247.94   17.06
  -2 -14   3  131.29   11.18
  -2 -14   3  117.14   12.30
  -1 -14   3   88.27    9.82
  -1 -14   3   80.30    9.17
   0 -14   3 1129.91   64.24
   0 -14   3 1073.10   59.40
   1 -14   3  206.49   19.12
   1 -14   3  256.06   17.27
   2 -14   3  571.09   34.07
   2 -14   3  583.30   38.56
   3 -14   3  398.07   26.43
   3 -14   3  423.11   30.72
   4 -14   3  712.34   41.55
   5 -14   3  800.75   54.49
  -5  14  -3  849.30   47.47
   5 -14   3  816.56   47.15
   6 -14   3  303.98   27.79
  -6  14  -3  310.58   21.58
   6 -14   3  279.93   21.83
  -7  14  -3    1.03    6.47
   7 -14   3   -6.68    6.93
   7 -14   3   -5.57   10.17
   8 -14   3   32.46   14.78
   9 -14   3  159.00   25.71
  10 -14   3   15.97   15.64
  11 -14   3   -9.64   12.33
  12 -14   3  190.83   32.38
  13 -14   3   12.13   17.35
  14 -14   3  109.72   28.17
  15 -14   3  -11.68   17.23
  16 -14   3   57.15   29.60
 -15 -13   3  255.80   34.15
 -14 -13   3   64.51   20.08
 -13 -13   3  191.55   28.47
 -12 -13   3  164.62   25.55
 -11 -13   3  222.59   27.92
 -10 -13   3   39.49   14.65
  -9 -13   3  129.80   20.13
  -8 -13   3   64.84   14.75
  -7 -13   3    7.06    9.10
  -7 -13   3   26.12    6.30
  -6 -13   3   48.68    6.98
  -5 -13   3 1192.39   65.30
  -5 -13   3 1194.68   66.69
  -4 -13   3   76.13    7.83
  -4 -13   3   92.72   12.22
  -3 -13   3  208.20   17.18
  -3 -13   3  222.39   15.17
  -2 -13   3   67.23    7.91
  -2 -13   3   76.19   11.54
  -1 -13   3  185.71   14.75
  -1 -13   3  191.39   14.98
   0 -13   3  159.71   14.18
   0 -13   3  165.65   13.38
   1 -13   3 1708.53   88.77
   1 -13   3 1730.80   97.06
   2 -13   3   80.58    9.10
   2 -13   3   91.16   13.39
   3 -13   3   89.10   10.05
   3 -13   3   88.02   14.65
   4 -13   3  138.90   18.41
  -4  13  -3   96.48   10.86
   4 -13   3  119.08   12.01
   5 -13   3  310.16   28.61
   5 -13   3  392.20   24.62
  -5  13  -3  380.94   24.11
  -6  13  -3  197.12   16.51
   6 -13   3  179.37   16.56
   6 -13   3  249.15   23.71
   7 -13   3   39.17   10.92
  -7  13  -3   52.61   10.11
   7 -13   3   35.70   13.84
   8 -13   3  235.09   25.60
  -8  13  -3  213.31   18.97
   9 -13   3   98.40   21.59
  10 -13   3  253.69   28.99
  11 -13   3   34.65   17.91
  12 -13   3   29.46   18.51
  13 -13   3  297.33   35.68
  14 -13   3   44.33   23.31
  15 -13   3   30.04   21.56
  16 -13   3   23.72   26.16
 -15 -12   3   18.73   16.88
 -14 -12   3   80.41   21.84
 -13 -12   3  120.38   23.01
 -12 -12   3   19.18   13.61
 -11 -12   3  335.22   28.95
 -10 -12   3   43.89   15.02
  -9 -12   3  693.12   45.33
  -8 -12   3  125.76   18.74
  -7 -12   3  521.78   31.96
  -7 -12   3  550.66   35.92
  -6 -12   3  179.64   12.95
  -5 -12   3  400.47   24.00
  -5 -12   3  396.55   27.13
  -4 -12   3  511.24   32.67
  -4 -12   3  533.26   30.48
  -3 -12   3  538.11   32.95
  -3 -12   3  536.61   31.49
  -2 -12   3    5.59    4.21
  -2 -12   3    5.04    5.28
  -1 -12   3   89.09    9.28
  -1 -12   3   90.37    9.53
   0 -12   3  736.19   43.99
   0 -12   3  727.95   40.70
   1 -12   3  195.27   16.65
   1 -12   3  207.74   14.57
   2 -12   3  176.54   13.48
   2 -12   3  179.76   16.62
   3 -12   3  341.92   25.66
   3 -12   3  300.73   20.89
   4 -12   3  337.84   22.02
  -4  12  -3  334.69   21.80
   4 -12   3  314.55   26.19
  -5  12  -3  869.67   50.67
   5 -12   3  913.53   57.71
   5 -12   3  885.92   49.33
   6 -12   3  126.49   12.99
   6 -12   3  149.34   21.56
  -6  12  -3  135.96   13.21
  -7  12  -3  398.84   27.59
   7 -12   3  407.40   33.95
  -8  12  -3   33.23    9.76
   8 -12   3   33.77   13.87
  -9  12  -3 1126.02   65.23
   9 -12   3 1068.54   73.02
  10 -12   3   16.58   14.28
  11 -12   3  123.94   25.86
  12 -12   3  121.38   26.43
  13 -12   3   37.31   22.38
  14 -12   3    2.23   18.22
  15 -12   3    3.72   19.01
  16 -12   3    9.94   23.52
 -15 -11   3   66.24   22.17
 -14 -11   3   32.29   16.32
 -13 -11   3  216.20   29.02
 -12 -11   3   52.94   16.32
 -11 -11   3    5.31   11.71
 -10 -11   3  940.51   58.32
  -9 -11   3   17.73   10.55
  -8 -11   3   81.41   11.04
  -8 -11   3   67.38   14.14
  -7 -11   3   67.42    8.61
  -7 -11   3   79.12   14.16
  -6 -11   3    2.68    7.36
  -6 -11   3   14.73    5.30
  -5 -11   3  636.27   38.64
  -5 -11   3  633.13   36.37
  -4 -11   3  324.19   22.49
  -4 -11   3  327.77   20.14
  -3 -11   3  702.58   40.88
  -3 -11   3  715.21   40.33
  -2 -11   3   27.50    7.30
  -2 -11   3   31.29    5.79
  -1 -11   3   21.57    5.51
  -1 -11   3   17.06    6.12
   0 -11   3  439.53   26.65
   0 -11   3  470.44   29.23
   1 -11   3  181.43   15.59
   1 -11   3  191.54   13.35
   2 -11   3   42.08    9.92
   2 -11   3   75.29    7.85
  -3  11  -3 2216.99  115.79
   3 -11   3 2137.73  111.20
   3 -11   3 2207.92  122.83
   4 -11   3 1267.96   66.06
  -4  11  -3 1208.74   68.36
   4 -11   3 1270.29   74.98
   5 -11   3   18.30    9.67
  -5  11  -3    5.45    5.84
   5 -11   3   10.90    6.23
   6 -11   3   -0.35    5.85
  -6  11  -3    2.81    6.68
   6 -11   3    5.82    9.60
  -7  11  -3  100.09   11.89
   7 -11   3   66.63   16.10
   8 -11   3  472.92   41.04
  -8  11  -3  632.02   37.33
  -9  11  -3   13.36    9.60
   9 -11   3   37.69   15.13
  10 -11   3   37.08   17.10
 -10  11  -3   58.13   13.84
  11 -11   3    6.57   14.63
  12 -11   3   56.15   19.26
  13 -11   3   36.41   19.94
  14 -11   3   -5.85   17.51
  15 -11   3  104.98   27.96
  16 -11   3   46.43   26.62
 -15 -10   3   -1.27   15.42
 -14 -10   3  270.60   27.24
 -13 -10   3   34.27   15.43
 -12 -10   3  162.47   24.17
 -11 -10   3   51.92   15.62
 -10 -10   3   28.45   12.40
  -9 -10   3    6.89    9.34
  -8 -10   3   -7.09    6.90
  -8 -10   3   -7.04    5.49
  -7 -10   3  138.41   12.14
  -7 -10   3  138.20   15.03
  -6 -10   3  361.65   25.42
  -6 -10   3  339.21   22.21
  -5 -10   3 1062.99   60.53
  -5 -10   3 1116.08   60.40
  -4 -10   3  145.01   10.57
  -4 -10   3  140.68   13.14
  -3 -10   3   63.33    9.27
  -3 -10   3   56.87    7.16
  -2 -10   3 1139.42   60.08
  -2 -10   3 1101.92   62.08
  -1 -10   3   81.15    8.15
  -1 -10   3   68.00    7.84
   0 -10   3    9.10    4.94
   0 -10   3    1.36    3.97
   1 -10   3   89.18    7.81
   1 -10   3   74.72    9.34
   2 -10   3 1311.44   69.27
   2 -10   3 1370.86   77.30
   3 -10   3   88.96    8.59
  -3  10  -3   85.25    8.86
   3 -10   3   76.95   12.91
   4 -10   3 1115.80   69.33
  -4  10  -3 1213.45   63.96
   4 -10   3 1135.54   60.75
  -5  10  -3   16.45    7.01
   5 -10   3   21.40    6.90
   5 -10   3   12.03    9.10
   6 -10   3  216.74   22.39
   6 -10   3  240.92   17.51
  -6  10  -3  251.11   18.88
   7 -10   3  664.77   45.84
  -7  10  -3  586.25   39.00
   8 -10   3   11.07   11.40
  -8  10  -3   10.43    7.73
   9 -10   3    8.02   12.43
  -9  10  -3    4.55    8.97
  10 -10   3   41.24   16.61
 -10  10  -3   22.97   12.18
  11 -10   3  111.16   23.94
  12 -10   3  149.72   27.03
  13 -10   3   49.01   20.99
  14 -10   3   31.71   20.18
  15 -10   3   14.92   20.57
  16 -10   3  104.51   31.65
 -15  -9   3    1.27   13.54
 -14  -9   3   42.46   16.58
 -13  -9   3  132.68   23.63
 -12  -9   3  243.09   24.58
 -11  -9   3   11.76   11.40
 -10  -9   3   80.85   16.84
  -9  -9   3   -4.26    6.84
  -9  -9   3    5.69    8.00
  -8  -9   3  237.64   18.48
  -8  -9   3  236.36   20.72
  -7  -9   3   -5.97    6.27
  -7  -9   3    1.48    5.73
  -6  -9   3 1315.52   73.24
  -6  -9   3 1332.54   72.85
  -5  -9   3   13.21    6.97
  -5  -9   3   21.06    5.32
  -4  -9   3 1170.17   63.76
  -4  -9   3 1184.79   64.59
  -3  -9   3  150.71   11.14
  -3  -9   3  159.57   13.03
  -2  -9   3   50.28    6.05
  -2  -9   3   48.05    7.53
  -1  -9   3    4.96    4.36
  -1  -9   3    8.42    4.18
   0  -9   3    8.71    4.70
   0  -9   3    1.98    3.73
   1  -9   3  236.56   17.72
   1  -9   3  233.07   14.81
   2  -9   3    9.16    5.47
   2  -9   3   21.94    5.56
  -3   9  -3   71.57    7.82
   3  -9   3   50.35   11.12
   3  -9   3   56.89    8.11
  -4   9  -3  172.52   14.07
   4  -9   3  176.61   12.93
   4  -9   3  185.97   17.70
   5  -9   3  600.29   43.93
   5  -9   3  700.28   37.58
  -5   9  -3  705.16   40.23
  -6   9  -3 1714.88   94.12
   6  -9   3 1716.03  101.01
  -7   9  -3   18.09    8.55
   7  -9   3   39.38   13.40
  -8   9  -3  544.34   35.99
   8  -9   3  536.23   41.35
  -9   9  -3    4.77    8.74
   9  -9   3    2.25   10.76
 -10   9  -3  260.60   23.60
  10  -9   3  231.25   26.46
  11  -9   3    0.88   12.85
 -11   9  -3    1.31   10.59
  12  -9   3  161.95   30.04
  13  -9   3   19.49   18.90
  14  -9   3    1.53   16.18
  15  -9   3    8.26   20.04
  16  -9   3   47.47   23.94
 -15  -8   3   -0.22   13.81
 -14  -8   3    0.31   12.94
 -13  -8   3  110.32   21.64
 -12  -8   3  328.82   29.27
 -11  -8   3  135.53   20.83
 -10  -8   3   86.39   16.98
 -10  -8   3   45.29   13.14
  -9  -8   3    2.28    8.39
  -9  -8   3    8.97    7.77
  -8  -8   3   40.30   11.26
  -8  -8   3   45.91   10.01
  -7  -8   3  161.03   15.85
  -7  -8   3  154.79   13.80
  -6  -8   3    5.56    5.03
  -6  -8   3   -0.29    5.80
  -5  -8   3   -7.63    4.61
  -5  -8   3    0.41    3.59
  -4  -8   3  508.51   31.02
  -4  -8   3  517.71   30.10
  -3  -8   3  388.72   24.27
  -3  -8   3  392.35   23.45
  -2  -8   3 3099.40  164.95
  -2  -8   3 3093.67  155.16
  -1  -8   3  285.37   18.51
  -1  -8   3  279.25   17.90
   0  -8   3  520.11   28.97
   0  -8   3  524.19   31.80
   1  -8   3   85.73    7.10
   1  -8   3   70.12    8.68
  -2   8  -3  668.60   37.19
   2  -8   3  645.49   40.42
   2  -8   3  650.93   35.17
   3  -8   3  107.33   12.18
   3  -8   3  104.66    8.59
  -3   8  -3  102.88    9.70
   4  -8   3   -1.24    3.67
   4  -8   3   -6.96    6.30
   5  -8   3 1355.98   69.46
  -5   8  -3 1323.87   73.93
   5  -8   3 1325.87   79.33
   6  -8   3   67.57   14.37
  -6   8  -3   79.96   12.44
  -7   8  -3  117.75   13.29
   7  -8   3  106.54   19.13
  -8   8  -3  226.15   19.32
   8  -8   3  188.27   22.15
   9  -8   3  137.06   22.20
  -9   8  -3  153.16   19.34
  10  -8   3  217.29   28.17
 -10   8  -3   85.35   18.47
  11  -8   3  118.83   23.70
 -11   8  -3   93.82   18.62
  12  -8   3    5.80   15.57
 -12   8  -3    1.52   12.80
  13  -8   3  -11.36   14.62
  14  -8   3   13.22   17.63
  15  -8   3   -2.89   18.38
  16  -8   3  101.78   29.82
 -18  -7   3  -27.23   17.65
 -15  -7   3   73.99   20.13
 -14  -7   3  -10.36   11.15
 -13  -7   3  156.19   24.70
 -12  -7   3  239.81   24.17
 -11  -7   3  538.35   38.55
 -10  -7   3  375.50   29.15
 -10  -7   3  413.56   30.61
  -9  -7   3   -6.04    7.27
  -9  -7   3   -5.77    7.20
  -8  -7   3  491.58   33.48
  -8  -7   3  501.82   32.68
  -7  -7   3   40.81   10.13
  -7  -7   3   26.82    8.36
  -6  -7   3  584.41   35.35
  -6  -7   3  586.48   36.27
  -5  -7   3    3.82    5.67
  -5  -7   3   11.94    4.73
  -4  -7   3  629.43   36.64
  -4  -7   3  648.69   37.18
  -3  -7   3 1174.71   64.06
  -3  -7   3 1163.02   62.09
  -2  -7   3    2.70    3.28
  -2  -7   3    2.75    3.97
  -1  -7   3  663.72   39.68
  -1  -7   3  721.19   37.67
   0  -7   3 1018.55   59.06
   0  -7   3 1083.84   54.39
   1  -7   3 1494.88   84.62
   1  -7   3 1553.58   76.74
   2  -7   3    7.66    3.65
   2  -7   3    1.39    4.54
  -2   7  -3    4.02    3.90
   3  -7   3 1724.63   98.46
   3  -7   3 1759.38   87.86
  -3   7  -3 1762.89   93.57
   4  -7   3   -4.59    6.35
   4  -7   3   -1.69    3.32
  -5   7  -3   81.52   10.93
   5  -7   3   56.27   12.15
   6  -7   3  391.38   29.39
  -6   7  -3  325.40   24.77
  -7   7  -3  256.77   20.09
   7  -7   3  197.80   21.90
   8  -7   3  -11.58    8.47
  -8   7  -3   -7.61    6.81
   9  -7   3    8.40    9.74
  -9   7  -3   -0.49    7.97
  10  -7   3  164.83   24.76
 -10   7  -3  130.29   19.92
  11  -7   3   25.69   15.33
 -11   7  -3   34.13   13.54
 -12   7  -3   -6.09   11.04
  12  -7   3  -14.53   11.38
  13  -7   3   -9.47   14.83
  14  -7   3   57.10   22.97
  15  -7   3   61.59   25.42
 -18  -6   3  -14.85   18.56
 -14  -6   3   12.18   13.67
 -13  -6   3   27.63   14.74
 -12  -6   3   18.89   14.34
 -11  -6   3  189.64   21.04
 -10  -6   3  240.77   22.18
  -9  -6   3   96.06   16.31
  -8  -6   3    1.43    7.48
  -8  -6   3    2.87    6.90
  -7  -6   3 1107.97   61.60
  -7  -6   3 1065.98   62.76
  -6  -6   3   17.90    7.83
  -6  -6   3   19.02    6.60
  -5  -6   3  711.13   41.54
  -5  -6   3  719.45   41.51
  -4  -6   3   10.96    4.17
  -4  -6   3    7.96    5.30
  -3  -6   3   27.44    6.50
  -3  -6   3   35.00    5.49
  -2  -6   3  355.21   21.53
  -2  -6   3  348.97   21.43
  -1  -6   3   26.59    5.67
  -1  -6   3   40.06    6.43
   0  -6   3   35.09    5.51
   0  -6   3   20.14    5.82
   1  -6   3  104.14   10.14
  -1   6  -3  110.42    8.93
   1  -6   3  105.49    7.56
   2  -6   3   -2.16    3.08
  -2   6  -3    4.78    3.81
   2  -6   3    1.87    2.92
  -3   6  -3  216.10   15.91
   3  -6   3  213.25   13.47
   3  -6   3  251.25   18.80
   4  -6   3   20.15    4.95
   4  -6   3   15.31    7.80
  -4   6  -3   18.27    6.02
   5  -6   3   22.98    9.46
  -5   6  -3   19.60    6.92
   6  -6   3  582.24   40.32
  -6   6  -3  579.64   37.01
  -7   6  -3  939.12   58.89
   7  -6   3 1062.43   64.32
   8  -6   3   -3.66    9.26
  -8   6  -3    1.22    7.05
   9  -6   3  100.63   19.33
  -9   6  -3  118.08   17.51
  10  -6   3   21.20   13.32
 -10   6  -3   20.71   11.71
  11  -6   3  360.73   34.46
 -11   6  -3  393.19   32.07
  12  -6   3   -0.66   12.36
 -12   6  -3    2.97   12.27
  13  -6   3   86.32   23.39
 -13   6  -3  133.85   23.69
  14  -6   3    8.71   17.91
  15  -6   3   23.21   21.62
 -18  -5   3    4.81   20.26
 -14  -5   3    0.51   12.19
 -13  -5   3  -12.08   10.63
 -12  -5   3   -3.46   11.40
  12   5  -3  -14.46   10.48
  11   5  -3   72.69   16.65
 -11  -5   3   58.91   15.51
 -10  -5   3    7.49    9.77
  10   5  -3   -2.79    8.75
   9   5  -3  178.09   17.43
  -7  -5   3  148.02   13.98
  -6  -5   3  115.77   11.15
  -5  -5   3  248.47   17.36
  -4  -5   3   80.30    7.79
  -3  -5   3  935.05   52.46
  -3  -5   3  955.74   50.75
  -2  -5   3   31.37    5.71
  -2  -5   3   35.46    5.77
  -1  -5   3   46.48    5.65
  -1  -5   3   48.41    5.35
   0  -5   3 1184.68   66.84
   0  -5   3 1231.91   61.24
  -1   5  -3  126.93    9.63
   1  -5   3  115.65   10.60
   1  -5   3  106.27    7.66
  -2   5  -3  403.21   24.56
   2  -5   3  411.13   26.67
   3  -5   3  368.62   25.51
  -3   5  -3  368.32   23.39
   4  -5   3  209.99   18.51
  -4   5  -3  231.98   16.61
   5  -5   3  125.90   13.98
  -5   5  -3   91.82   11.07
  -6   5  -3  521.15   32.19
   6  -5   3  423.23   33.45
  -7   5  -3  164.81   17.00
   7  -5   3  144.69   18.01
  -8   5  -3   -8.53    7.32
   8  -5   3   -6.70    7.68
   9  -5   3   -1.15    8.74
  -9   5  -3   -5.02    7.37
 -10   5  -3   89.85   17.73
  10  -5   3   68.93   18.46
  11  -5   3  101.10   21.62
 -11   5  -3   88.41   18.41
  12  -5   3   83.17   21.09
 -12   5  -3  103.38   20.42
 -13   5  -3    5.29   13.08
  13  -5   3   13.80   15.57
  14  -5   3   -1.91   15.56
  15  -5   3   68.87   23.98
 -14  -4   3   -6.70   11.77
 -13  -4   3  -12.07    9.44
  12   4  -3  450.61   35.52
 -12  -4   3  435.43   33.88
  11   4  -3  405.89   32.43
  10   4  -3  134.86   16.28
   9   4  -3  152.26   16.46
   8   4  -3  131.39   14.70
  -6  -4   3    2.91    5.01
  -5  -4   3  130.85   11.46
  -4  -4   3  491.74   29.56
  -3  -4   3   50.83    6.79
  -2  -4   3 2480.99  132.59
  -1  -4   3    1.61    3.16
  -1  -4   3    0.84    2.60
   0  -4   3 1505.89   75.30
   1  -4   3 1765.06   94.00
  -1   4  -3 1666.36   90.59
  -2   4  -3 1512.32   80.92
   2  -4   3 1508.39   84.03
   3  -4   3   86.24   10.12
  -3   4  -3   83.02    9.00
  -4   4  -3   71.82    9.89
   4  -4   3   58.52   11.00
  -5   4  -3 1387.41   74.61
   5  -4   3 1271.79   77.50
   6  -4   3   39.36   11.01
  -6   4  -3   52.73   10.89
  -7   4  -3  279.85   22.72
   7  -4   3  252.16   23.70
   8  -4   3    5.45   10.33
  -8   4  -3    6.39    8.77
   9  -4   3  202.04   21.90
  -9   4  -3  198.26   20.38
 -10   4  -3   53.13   15.04
  10  -4   3   58.58   16.10
  11  -4   3    4.70   12.61
 -11   4  -3   13.62   14.08
  12  -4   3   20.50   14.73
 -12   4  -3   29.50   15.47
  13  -4   3  309.84   33.51
 -13   4  -3  365.84   33.27
 -14   4  -3   80.51   21.98
  14  -4   3   89.00   25.55
 -17  -3   3  -10.34   15.52
 -14  -3   3   24.79   13.71
 -13  -3   3   22.61   13.28
  13   3  -3   -2.38   11.94
  12   3  -3  251.46   25.33
  11   3  -3 1071.83   67.79
  10   3  -3   17.05    9.23
   9   3  -3  161.07   17.22
   8   3  -3 2127.04  119.35
   7   3  -3  327.19   24.05
  -5  -3   3  415.66   26.78
  -4  -3   3  470.69   28.72
  -3  -3   3 1124.69   62.27
  -2  -3   3  235.53   15.48
  -1  -3   3  339.45   20.66
   0  -3   3  297.60   18.88
   1  -3   3  924.68   53.30
  -1   3  -3  959.02   51.55
  -2   3  -3  671.79   39.18
   2  -3   3  705.93   40.93
  -3   3  -3    0.13    3.89
   3  -3   3   -1.89    3.77
   4  -3   3    6.08    5.57
  -4   3  -3   -0.42    4.05
   5  -3   3 1564.81   88.68
  -5   3  -3 1515.59   85.34
  -6   3  -3  360.28   29.42
   6  -3   3  507.31   32.83
   7  -3   3    1.93    7.50
  -7   3  -3   -1.87    7.56
   8  -3   3  268.34   24.66
  -8   3  -3  253.19   23.01
   9  -3   3   37.25   12.94
  -9   3  -3   41.82   13.26
 -10   3  -3  308.80   27.22
  10  -3   3  258.24   26.72
 -11   3  -3   49.14   16.43
  11  -3   3   16.02   14.25
  12  -3   3  166.19   27.93
 -12   3  -3  210.53   28.27
  13  -3   3  134.63   26.27
 -13   3  -3   59.98   19.44
 -14   3  -3  244.14   33.09
  14  -3   3  171.21   31.84
 -15   3  -3   -3.39   14.68
 -14  -2   3  187.33   25.80
  13   2  -3   12.76   13.75
  12   2  -3   92.62   19.71
  11   2  -3   15.91   12.29
  10   2  -3  135.15   16.64
   9   2  -3   92.99   15.56
   8   2  -3  162.09   16.26
   7   2  -3  104.94   14.66
   6   2  -3   -0.77    4.94
  -5  -2   3   48.05    8.44
  -4  -2   3 1466.63   80.98
  -3  -2   3  946.05   53.08
  -2  -2   3   11.36    3.80
  -1  -2   3  127.14    9.49
   0  -2   3  201.58   13.92
   0   2  -3  216.42   13.48
  -1   2  -3  670.88   37.90
   1  -2   3  681.93   39.13
  -2   2  -3  996.00   55.75
   2  -2   3 1030.73   57.55
   3  -2   3   18.64    6.67
  -3   2  -3   36.37    7.23
   4  -2   3  751.15   45.42
  -4   2  -3  736.13   43.83
   5  -2   3  104.61   12.13
  -5   2  -3   60.09   11.51
   6  -2   3 5528.33  297.49
  -6   2  -3 5525.83  289.88
   7  -2   3  223.56   20.99
  -7   2  -3  223.41   20.46
   8  -2   3   27.29   11.21
  -8   2  -3    2.00    8.65
   9  -2   3   29.83   12.54
  -9   2  -3   33.31   12.34
  10  -2   3   17.92   11.97
 -10   2  -3   -1.82   11.17
 -11   2  -3   52.50   16.67
  11  -2   3   33.53   15.96
 -12   2  -3  144.46   24.98
  12  -2   3  155.76   25.74
 -13   2  -3   59.11   19.81
  13  -2   3   74.19   20.33
 -14   2  -3  329.92   35.38
 -15   2  -3  -17.88   14.58
  13   1  -3   97.34   20.69
  12   1  -3   15.18   12.31
  11   1  -3  354.07   30.23
  10   1  -3   27.05   12.05
   9   1  -3   40.88   12.27
   8   1  -3  179.67   17.51
   7   1  -3   83.08   12.86
   6   1  -3   10.05    6.61
   5   1  -3   34.68    7.75
  -4  -1   3  134.12   11.49
  -3  -1   3 2191.54  118.27
  -2  -1   3   15.30    3.97
  -1  -1   3  330.34   20.21
   0  -1   3  479.37   27.48
   0   1  -3  456.82   26.46
   1  -1   3  389.50   24.49
  -1   1  -3  412.16   24.05
  -2   1  -3 2440.88  128.44
   2  -1   3 2435.51  131.61
  -3   1  -3 2953.11  160.99
   3  -1   3 3174.58  165.38
  -4   1  -3  128.31    8.12
  -4   1  -3  100.60   11.40
   4  -1   3  136.21   12.47
  -5   1  -3  951.54   55.43
   5  -1   3  924.30   56.32
  -5   1  -3  936.72   48.48
  -6   1  -3   72.44   10.01
  -6   1  -3  121.05   16.58
  -7   1  -3   47.23   12.02
   7  -1   3   31.41   10.72
  -8   1  -3  313.00   21.51
   8  -1   3  333.95   27.92
  -8   1  -3  361.82   28.20
  -9   1  -3    5.14    9.17
   9  -1   3   16.19   10.77
 -10   1  -3  213.03   23.55
  10  -1   3  234.87   24.50
  11  -1   3  219.15   24.43
 -11   1  -3  215.87   24.60
 -12   1  -3   -7.78   11.10
  12  -1   3   10.62   13.95
  13  -1   3  159.69   27.32
 -13   1  -3   76.79   22.62
 -14   1  -3  207.79   33.22
 -15   1  -3   86.46   24.10
  14   0  -3   -1.45   14.64
  13   0  -3    8.96   12.99
  12   0  -3   -6.32   11.24
  11   0  -3  781.63   53.78
  10   0  -3   -1.55    8.19
   9   0  -3  169.59   18.01
   8   0  -3   -9.06    6.48
   7   0  -3   50.67   11.03
   6   0  -3   -2.91    4.61
   5   0  -3   31.83    7.72
  -3   0   3 5615.00  297.30
  -2   0   3   -2.97    2.51
  -1   0   3  376.46   22.73
   0   0   3    2.76    2.46
   0   0  -3    1.60    2.37
   1   0   3  627.18   36.04
  -1   0  -3  622.51   35.49
   2   0   3    2.14    3.99
  -2   0  -3   -1.90    3.71
  -3   0  -3   51.21    7.92
   3   0   3   27.24    6.99
  -4   0  -3   -2.35    3.28
   4   0   3   -7.55    3.93
  -4   0  -3    1.72    2.73
  -5   0  -3  488.39   30.08
   5   0   3  397.20   28.60
  -5   0  -3  378.73   23.41
   6   0   3    5.16    8.16
  -6   0  -3   -4.89    5.02
  -6   0  -3    7.16    9.14
  -7   0  -3  955.06   49.84
   7   0   3  874.87   57.07
  -7   0  -3  940.63   57.35
  -8   0  -3    0.83    7.91
  -8   0  -3    2.63    5.93
   8   0   3   13.72    8.78
  -9   0  -3  898.14   57.79
   9   0   3  868.18   57.50
 -10   0  -3    8.60   10.81
  10   0   3   13.47   11.33
 -11   0  -3  192.67   23.15
  11   0   3  174.48   25.76
 -12   0  -3   -3.37   12.36
  12   0   3   -7.38   11.50
 -13   0  -3  496.89   42.61
 -14   0  -3   23.56   19.45
 -15   0  -3    4.29   16.94
 -16   0  -3   -6.13   15.67
  14  -1  -3   98.13   22.03
  13  -1  -3  108.60   23.35
  12  -1  -3   22.83   15.02
  11  -1  -3  385.36   33.05
  10  -1  -3   22.49   11.10
   9  -1  -3   53.37   13.89
   8  -1  -3  203.23   19.92
   7  -1  -3   87.75   14.02
   6  -1  -3    8.89    6.17
   5  -1  -3   27.34    7.35
   4  -1  -3  127.12   11.45
  -3   1   3 2193.99  118.89
  -2   1   3   12.14    4.17
  -1   1   3  305.34   19.65
   1  -1  -3  339.48   18.61
   0  -1  -3  469.89   26.80
   0   1   3  469.47   27.33
   1   1   3  394.03   23.93
  -1  -1  -3  400.15   23.95
   2   1   3 2437.34  129.99
  -2  -1  -3 2392.91  127.49
   3   1   3 3047.78  160.86
  -3  -1  -3 2932.71  157.83
   4   1   3  123.99   11.86
  -4  -1  -3  139.32    8.85
  -4  -1  -3  109.49   12.21
  -5  -1  -3  885.15   54.60
   5   1   3  941.88   54.93
  -5  -1  -3  931.04   48.04
  -6  -1  -3   46.26    9.96
  -6  -1  -3  116.67   16.81
  -7  -1  -3   13.57    7.12
   7   1   3   51.84   11.92
  -7  -1  -3   31.94   11.31
  -8  -1  -3  350.42   28.54
   8   1   3  339.03   27.24
  -8  -1  -3  328.66   22.22
   9   1   3   22.47   11.06
  -9  -1  -3   -1.72    8.63
  -9  -1  -3    8.22    7.41
 -10  -1  -3  224.39   24.93
  10   1   3  264.94   25.36
 -11  -1  -3  229.48   25.98
  11   1   3  233.40   24.45
 -12  -1  -3   -0.23   13.11
  12   1   3   -2.66   12.94
 -13  -1  -3   83.01   21.10
 -14  -1  -3  194.30   32.17
 -15  -1  -3   69.28   25.62
 -16  -1  -3   -3.27   18.58
 -17  -1  -3   87.64   27.35
  15  -2  -3    1.56   16.76
  14  -2  -3  121.57   24.26
  13  -2  -3    1.39   14.17
  12  -2  -3  114.52   22.76
  11  -2  -3   38.03   14.64
  10  -2  -3  145.30   22.08
   9  -2  -3  101.66   17.26
   8  -2  -3  203.37   19.97
   7  -2  -3  116.15   16.15
   6  -2  -3   -8.20    4.37
   5  -2  -3   47.13    9.43
   4  -2  -3 1460.54   81.71
  -3   2   3  988.09   56.10
  -2   2   3   14.01    4.29
   2  -2  -3    2.66    3.42
  -1   2   3  123.75   10.10
   1  -2  -3  151.42    9.58
   1  -2  -3  144.33    9.72
   0  -2  -3  209.53   12.36
   0   2   3  192.37   13.61
   0  -2  -3  230.05   13.87
  -1  -2  -3  645.60   37.78
   1   2   3  695.04   38.13
  -2  -2  -3  976.55   56.63
   2   2   3 1065.85   57.06
  -3  -2  -3   36.77    5.03
  -3  -2  -3   36.14    7.84
   3   2   3   33.12    6.75
  -4  -2  -3  819.14   40.83
  -4  -2  -3  764.68   46.58
   4   2   3  755.71   45.85
  -5  -2  -3   57.80    7.07
  -5  -2  -3   64.16   12.17
   5   2   3  103.20   10.66
   6   2   3 5495.88  300.14
  -6  -2  -3 5661.74  276.44
  -6  -2  -3 5668.03  295.19
   7   2   3  218.58   20.36
  -7  -2  -3  237.80   22.06
  -7  -2  -3  245.26   16.81
  -8  -2  -3    6.51    9.59
  -8  -2  -3   14.32    7.00
   8   2   3   23.35   10.14
  -9  -2  -3   40.14   10.42
   9   2   3   33.49   12.33
  -9  -2  -3   44.03   14.07
  10   2   3    0.77   11.07
 -10  -2  -3   -4.44   12.05
  11   2   3   34.69   14.26
 -11  -2  -3   53.36   17.33
 -12  -2  -3  102.99   22.85
 -13  -2  -3   84.46   23.92
 -14  -2  -3  368.92   37.75
 -15  -2  -3   -7.90   18.08
 -16  -2  -3   34.53   21.79
 -17  -2  -3   25.18   22.19
  15  -3  -3   -9.65   15.22
  14  -3  -3    7.81   16.19
  13  -3  -3   -8.99   12.96
  12  -3  -3  277.96   28.91
  11  -3  -3 1008.20   66.60
  10  -3  -3    5.27   10.73
   9  -3  -3  183.66   19.77
   8  -3  -3 2066.27  118.33
   7  -3  -3  357.37   27.32
   6  -3  -3  211.79   18.23
   5  -3  -3  393.07   27.24
   4  -3  -3  476.91   30.55
   3  -3  -3 1123.45   63.40
   2  -3  -3  213.05   14.81
  -2   3   3  238.61   15.94
   1  -3  -3  371.24   20.50
   1  -3  -3  365.14   20.47
  -1   3   3  332.89   21.73
   0   3   3  292.75   17.19
   0  -3  -3  256.01   15.51
   0  -3  -3  262.78   16.78
  -1  -3  -3  985.81   48.70
  -1  -3  -3  951.70   52.59
   1   3   3  922.24   52.76
  -2  -3  -3  738.22   37.11
   2   3   3  729.18   41.14
  -2  -3  -3  693.95   41.54
   3   3   3   -6.06    3.06
  -3  -3  -3   -6.75    2.95
  -3  -3  -3    1.33    2.75
  -4  -3  -3    5.09    3.68
   4   3   3   14.09    5.47
  -4  -3  -3   -3.38    4.77
   5   3   3 1569.32   86.18
  -5  -3  -3 1561.50   78.22
  -5  -3  -3 1458.83   86.10
  -6  -3  -3  468.92   27.93
  -6  -3  -3  390.32   32.85
   6   3   3  570.65   33.35
  -7  -3  -3   -3.44    5.23
   7   3   3   -1.16    7.65
  -7  -3  -3    0.19    8.52
  -8  -3  -3  265.55   24.48
   8   3   3  242.89   22.16
  -8  -3  -3  258.52   18.42
  -9  -3  -3   39.13   13.33
   9   3   3   13.50   10.44
  -9  -3  -3   31.01    9.35
  10   3   3  282.46   26.68
 -10  -3  -3  318.89   29.58
 -11  -3  -3   59.40   18.11
  11   3   3   59.91   16.59
 -12  -3  -3  193.86   29.22
 -13  -3  -3   91.20   24.28
 -14  -3  -3  235.27   36.15
 -15  -3  -3  -11.84   15.88
 -16  -3  -3    2.83   17.26
 -17  -3  -3   16.02   21.81
  16  -4  -3   23.70   21.60
  15  -4  -3   33.09   19.59
  14  -4  -3   -8.03   14.15
  13  -4  -3    2.23   13.83
  12  -4  -3  464.13   39.47
  11  -4  -3  400.32   34.99
  10  -4  -3  174.68   24.74
   9  -4  -3  161.08   18.64
   8  -4  -3  147.73   17.47
   7  -4  -3  252.22   21.86
   6  -4  -3    4.52    6.41
   5  -4  -3  127.67   12.95
   4  -4  -3  494.15   31.74
   3  -4  -3   41.87    7.46
   3  -4  -3   56.88    8.47
  -2   4   3 2603.68  137.81
   2  -4  -3 2509.58  128.17
   1  -4  -3    2.54    3.29
  -1   4   3    1.69    3.37
   1  -4  -3    1.05    2.37
   0  -4  -3 1453.69   74.21
   0   4   3 1493.11   79.76
   0  -4  -3 1461.44   77.93
  -1  -4  -3 1709.81   86.41
   1   4   3 1754.30   93.16
  -1  -4  -3 1719.04   92.04
  -2  -4  -3 1562.56   77.67
   2   4   3 1526.67   84.12
  -2  -4  -3 1561.08   84.14
  -3  -4  -3   94.23    7.27
  -3  -4  -3   71.74   10.84
   3   4   3   99.76    8.64
  -4  -4  -3   61.78   10.91
   4   4   3   61.21    7.64
  -4  -4  -3   66.19    6.49
  -5  -4  -3 1493.61   80.63
  -5  -4  -3 1354.70   72.07
   5   4   3 1357.06   78.80
  -6  -4  -3   35.18   11.56
   6   4   3   38.21    9.38
  -6  -4  -3   26.14    7.25
  -7  -4  -3  274.30   18.69
  -7  -4  -3  266.74   24.20
   7   4   3  260.69   21.90
   8   4   3   -0.65    8.12
  -8  -4  -3   14.85   10.33
  -8  -4  -3   15.21    7.49
   9   4   3  222.83   20.77
  -9  -4  -3  220.85   17.46
  -9  -4  -3  182.90   21.02
  10   4   3   48.53   14.30
 -10  -4  -3   69.80   16.52
 -11  -4  -3   44.31   17.57
 -12  -4  -3   23.25   15.62
 -13  -4  -3  342.52   34.63
 -14  -4  -3   39.54   21.96
 -15  -4  -3  -10.26   16.97
 -16  -4  -3   16.41   22.74
 -17  -4  -3  -11.22   20.04
  16  -5  -3    5.61   17.17
  15  -5  -3   18.05   19.29
  14  -5  -3   10.02   16.32
  13  -5  -3    4.56   14.64
  12  -5  -3   10.01   13.69
  11  -5  -3   69.92   18.25
  10  -5  -3    8.58   10.46
   9  -5  -3  179.86   19.97
   8  -5  -3  188.76   19.90
   7  -5  -3  164.01   17.29
   6  -5  -3  102.69   12.68
   5  -5  -3  255.90   20.21
   4  -5  -3   43.79    8.33
   4  -5  -3   53.48    9.43
   3  -5  -3  968.73   51.98
   3  -5  -3  956.78   55.54
   2  -5  -3   13.62    5.14
   1  -5  -3   44.21    4.89
   1  -5  -3   43.22    6.47
  -1   5   3   36.02    6.33
   0  -5  -3 1173.99   60.97
   0   5   3 1138.51   65.00
   0  -5  -3 1250.38   63.85
  -1  -5  -3  119.21    8.72
   1   5   3   97.35    8.78
  -1  -5  -3  115.63   10.08
  -2  -5  -3  420.91   27.09
   2   5   3  443.99   25.66
  -2  -5  -3  427.86   23.73
  -3  -5  -3  368.36   25.47
  -3  -5  -3  392.47   21.66
   3   5   3  373.97   23.24
  -4  -5  -3  217.13   13.94
   4   5   3  200.14   14.99
  -4  -5  -3  205.72   17.66
  -5  -5  -3  113.31   10.38
  -5  -5  -3  110.60   15.10
   5   5   3  150.68   12.54
  -6  -5  -3  502.76   34.14
  -6  -5  -3  461.02   27.54
   6   5   3  413.32   30.02
  -7  -5  -3  185.52   19.03
  -7  -5  -3  121.39   12.30
   7   5   3  115.57   14.86
   8   5   3  -18.51    6.28
  -8  -5  -3   -0.83    6.12
  -8  -5  -3   -1.94    6.71
  -9  -5  -3   -7.30    9.09
   9   5   3    2.90    8.15
  -9  -5  -3   -3.70    6.48
  10   5   3   73.27   15.89
 -10  -5  -3   93.42   17.53
 -11  -5  -3   62.47   19.44
 -12  -5  -3  113.88   24.32
 -13  -5  -3   15.01   15.91
 -14  -5  -3  -12.63   16.25
 -15  -5  -3   47.55   23.82
 -16  -5  -3   25.10   20.47
 -17  -5  -3  101.99   31.94
  16  -6  -3  -26.49   14.92
  15  -6  -3   -7.45   17.20
  14  -6  -3  -12.24   12.94
  13  -6  -3   24.79   18.14
  12  -6  -3   40.31   17.80
  11  -6  -3  179.02   26.22
  10  -6  -3  224.41   23.70
   9  -6  -3  110.46   19.12
   8  -6  -3    0.74    8.84
   7  -6  -3 1049.63   64.75
   6  -6  -3   21.10    8.72
   5  -6  -3  700.29   44.16
   4  -6  -3   14.21    6.05
   4  -6  -3   11.82    5.73
   3  -6  -3   22.72    6.52
   3  -6  -3    7.92    5.28
   2  -6  -3  347.04   23.37
   2  -6  -3  375.85   22.46
  -1   6   3   23.95    5.74
   1  -6  -3   34.49    5.15
   1  -6  -3   37.12    6.24
   0   6   3   32.95    5.74
   0  -6  -3   35.32    6.47
   0  -6  -3   39.14    5.94
  -1  -6  -3  120.00    8.87
  -1  -6  -3  114.93   10.02
   1   6   3  103.78    8.68
  -2  -6  -3    6.49    3.64
  -2  -6  -3    4.75    4.63
   2   6   3   -0.96    2.87
  -3  -6  -3  250.12   15.30
   3   6   3  242.70   15.89
  -3  -6  -3  222.25   18.31
  -4  -6  -3   32.32    6.37
   4   6   3   22.93    5.89
  -4  -6  -3   10.28    6.19
  -5  -6  -3   10.06    8.43
  -5  -6  -3   30.86    7.26
   5   6   3   29.26    7.34
  -6  -6  -3  609.77   34.24
  -6  -6  -3  518.61   39.37
   6   6   3  633.65   37.30
  -7  -6  -3 1149.55   58.93
   7   6   3 1096.69   63.88
  -7  -6  -3  983.76   65.68
  -8  -6  -3   -1.99    6.01
   8   6   3   -4.80    7.53
  -8  -6  -3    0.53    9.73
  -9  -6  -3  106.71   12.23
  -9  -6  -3  119.36   20.67
   9   6   3  115.61   16.90
 -10  -6  -3   18.04   13.37
 -11  -6  -3  415.46   37.39
 -12  -6  -3  -11.60   12.78
 -13  -6  -3  152.34   28.62
 -14  -6  -3   -1.04   15.48
 -15  -6  -3   22.77   21.94
 -16  -6  -3    6.52   20.01
 -17  -6  -3   56.42   26.05
  17  -7  -3   85.02   29.09
  16  -7  -3    0.96   19.45
  15  -7  -3   29.62   20.06
  14  -7  -3    0.23   14.49
  13  -7  -3   97.91   23.54
  12  -7  -3  260.40   29.36
  11  -7  -3  444.97   37.77
  10  -7  -3  370.75   32.24
   9  -7  -3  -10.62    7.47
   8  -7  -3  479.77   36.03
   7  -7  -3   16.40    9.50
   6  -7  -3  578.57   39.05
   5  -7  -3    7.01    6.12
   5  -7  -3    3.74    6.45
   4  -7  -3  554.48   35.19
   4  -7  -3  643.81   38.43
   3  -7  -3 1204.69   63.01
   3  -7  -3 1146.88   67.16
   2  -7  -3    3.14    4.15
   2  -7  -3   -0.64    3.12
  -1   7   3  641.20   41.74
   1  -7  -3  767.28   40.21
   1  -7  -3  781.08   39.88
   0  -7  -3  998.09   53.33
   0  -7  -3 1009.54   55.18
   0   7   3 1036.19   56.47
  -1  -7  -3 1502.73   76.83
  -1  -7  -3 1582.95   81.60
   1   7   3 1436.96   81.51
  -2  -7  -3    0.79    4.42
   2   7   3    4.49    3.46
  -2  -7  -3    7.52    3.94
   3   7   3 1783.47   95.94
  -3  -7  -3 1778.68   97.44
  -3  -7  -3 1765.85   90.13
  -4  -7  -3  -16.06    5.32
  -4  -7  -3    5.91    4.60
   4   7   3    3.61    4.17
  -5  -7  -3   66.53    9.65
  -5  -7  -3   58.87   12.70
   5   7   3   61.14    9.33
  -6  -7  -3  349.88   28.71
  -6  -7  -3  352.13   23.38
   6   7   3  385.87   25.12
   7   7   3  220.29   19.15
  -7  -7  -3  207.93   17.26
  -7  -7  -3  258.94   22.90
   8   7   3   -4.16    6.87
  -8  -7  -3   -1.58    5.94
  -8  -7  -3   -8.60    8.79
  -9  -7  -3   -0.84    7.12
  -9  -7  -3    0.00    7.92
   9   7   3   -0.67    7.99
 -10  -7  -3  151.66   24.73
 -11  -7  -3   18.03   16.15
 -12  -7  -3   -3.71   12.51
 -13  -7  -3    1.48   15.14
 -14  -7  -3   60.85   23.25
 -15  -7  -3  112.91   28.54
 -16  -7  -3   54.88   25.24
 -17  -7  -3   33.78   24.16
  17  -8  -3  -21.91   16.46
  16  -8  -3   39.99   23.02
  15  -8  -3   -9.32   17.30
  14  -8  -3    3.07   15.08
  13  -8  -3  123.07   25.90
  12  -8  -3  316.47   32.13
  11  -8  -3   83.52   20.27
  10  -8  -3   45.23   15.19
   9  -8  -3   -5.22    9.73
   8  -8  -3   43.40   13.68
   7  -8  -3  170.04   18.39
   6  -8  -3   19.21    8.82
   5  -8  -3   -2.26    5.49
   5  -8  -3   -3.59    5.46
   4  -8  -3  642.46   36.26
   4  -8  -3  553.30   37.82
   3  -8  -3  390.06   25.21
   3  -8  -3  399.44   26.72
   2  -8  -3 2936.09  161.16
   2  -8  -3 3041.27  150.67
  -1   8   3  262.50   17.80
   1  -8  -3  256.47   15.78
   1  -8  -3  250.37   17.27
   0   8   3  504.68   29.71
   0  -8  -3  491.19   29.05
   0  -8  -3  503.83   28.87
   1   8   3   70.60    7.13
  -1  -8  -3   92.08    7.89
  -1  -8  -3   83.70    8.72
   2   8   3  676.31   37.69
  -2  -8  -3  662.23   39.88
  -2  -8  -3  665.63   36.46
   3   8   3   97.41    8.42
  -3  -8  -3  108.70    9.20
   4   8   3   -2.96    3.66
   5   8   3 1436.21   78.38
  -5  -8  -3 1394.51   74.10
  -6  -8  -3   60.89   10.87
   6   8   3   56.11    9.70
  -7  -8  -3  145.54   13.17
  -7  -8  -3  135.98   19.45
   7   8   3  122.50   13.63
  -8  -8  -3  206.10   21.56
  -8  -8  -3  207.01   17.00
   8   8   3  185.21   17.83
  -9  -8  -3  152.18   23.26
  -9  -8  -3  125.26   13.86
 -10  -8  -3  121.79   22.94
 -11  -8  -3  105.72   23.98
 -12  -8  -3   -4.56   15.08
 -13  -8  -3   -6.59   14.18
 -14  -8  -3   20.45   19.80
 -15  -8  -3  -31.51   14.40
 -16  -8  -3   80.40   26.19
 -17  -8  -3    5.37   19.17
  17  -9  -3   11.49   22.26
  16  -9  -3   -1.74   17.27
  15  -9  -3    0.45   16.55
  14  -9  -3   34.81   18.97
  13  -9  -3  124.41   25.71
  12  -9  -3  221.50   26.54
  11  -9  -3   19.56   13.72
  10  -9  -3   74.71   17.95
   9  -9  -3   -9.77    7.70
   8  -9  -3  234.37   23.30
   7  -9  -3    3.09    8.89
   6  -9  -3 1260.47   74.43
   6  -9  -3 1210.19   68.87
   5  -9  -3   29.30    8.81
   5  -9  -3   12.95    6.40
   4  -9  -3 1131.70   65.49
   4  -9  -3 1086.04   60.90
   3  -9  -3  128.18   12.36
   3  -9  -3  144.64   12.84
   2  -9  -3   58.81    8.87
   2  -9  -3   19.65    6.67
   1  -9  -3   16.08    6.16
   1  -9  -3   19.11    4.22
   1  -9  -3   13.74    5.33
   0  -9  -3   16.83    4.77
   0  -9  -3   19.90    5.78
   0   9   3    5.89    4.21
  -1  -9  -3  224.77   16.58
  -1  -9  -3  226.25   15.49
   1   9   3  241.27   15.28
   2   9   3   10.06    4.09
  -3  -9  -3   54.42    8.21
   3   9   3   46.14    5.76
  -4  -9  -3  217.73   15.10
   4   9   3  188.09   13.82
  -5  -9  -3  614.49   36.12
   5   9   3  640.83   36.97
  -6  -9  -3 1800.14   92.56
   6   9   3 1744.47   97.56
  -7  -9  -3   39.12    9.95
   7   9   3   29.20    8.79
  -8  -9  -3  579.16   42.34
  -8  -9  -3  570.32   35.36
   8   9   3  555.11   36.82
  -9  -9  -3    5.04   10.81
  -9  -9  -3    3.92    8.27
 -10  -9  -3  231.43   20.83
 -10  -9  -3  280.27   28.51
 -11  -9  -3   -5.87   13.09
 -12  -9  -3  134.03   27.07
 -13  -9  -3   41.43   20.09
 -14  -9  -3   12.43   17.04
 -15  -9  -3   31.03   20.54
 -16  -9  -3   50.37   24.82
 -17  -9  -3    2.49   21.93
  18 -10  -3   82.55   27.06
  17 -10  -3    1.71   19.98
  16 -10  -3   59.58   25.22
  15 -10  -3    1.74   18.55
  14 -10  -3  265.54   31.73
  13 -10  -3   49.33   20.52
  12 -10  -3  113.04   24.47
  11 -10  -3   22.06   14.98
  10 -10  -3   50.75   16.69
   9 -10  -3    0.63    9.87
   8 -10  -3   -6.68    8.52
   7 -10  -3  122.40   17.81
   7 -10  -3  134.12   16.69
   6 -10  -3  372.53   26.25
   6 -10  -3  329.61   27.58
   5 -10  -3 1028.63   58.56
   5 -10  -3 1034.95   62.81
   4 -10  -3  135.68   15.08
   4 -10  -3  205.17   15.77
   3 -10  -3   66.06   10.89
   3 -10  -3   54.18   10.03
   2 -10  -3 1056.92   60.87
   2 -10  -3 1054.29   57.53
   1 -10  -3   72.96    8.16
   1 -10  -3   73.38    6.90
   1 -10  -3   76.66    8.88
   0 -10  -3    4.01    3.49
   0 -10  -3   16.16    5.65
   0  10   3    9.05    4.70
  -1 -10  -3   90.54    8.59
   1  10   3   61.87    7.20
  -1 -10  -3   89.88    9.41
   2  10   3 1382.04   73.19
  -2 -10  -3 1310.13   70.04
   3  10   3   65.46    7.17
  -3 -10  -3  107.15    9.85
   4  10   3 1115.52   61.41
  -4 -10  -3 1122.82   59.98
  -5 -10  -3   30.21    8.14
   5  10   3   36.90    6.75
  -6 -10  -3  223.32   17.62
   6  10   3  243.14   17.33
   7  10   3  683.13   40.19
  -7 -10  -3  624.48   38.95
  -8 -10  -3   18.30    9.07
  -9 -10  -3    4.47    8.99
  -9 -10  -3   16.93   12.03
 -10 -10  -3   21.51   12.37
 -10 -10  -3   50.34   13.89
 -11 -10  -3   94.31   23.47
 -12 -10  -3  109.86   23.20
 -13 -10  -3   28.50   18.47
 -14 -10  -3   65.84   24.02
 -15 -10  -3   19.76   18.54
 -16 -10  -3  135.19   31.80
 -17 -10  -3   45.27   25.60
  18 -11  -3   76.56   30.95
  17 -11  -3  118.46   30.02
  16 -11  -3    4.28   19.21
  15 -11  -3   60.28   23.72
  14 -11  -3   23.18   17.07
  13 -11  -3  165.03   29.44
  12 -11  -3   69.15   21.03
  11 -11  -3   31.39   15.82
  10 -11  -3  946.46   64.68
   9 -11  -3   12.00   12.28
  -8  11   3   91.00   10.99
   8 -11  -3   73.29   16.44
   7 -11  -3   94.17   17.32
   7 -11  -3  123.56   18.43
  -7  11   3   84.80    9.25
   6 -11  -3   21.70    8.85
  -6  11   3   26.29    5.18
   6 -11  -3   33.07   10.62
   5 -11  -3  607.68   43.23
   5 -11  -3  727.12   41.84
   4 -11  -3  335.70   25.82
   4 -11  -3  363.97   25.10
   3 -11  -3  704.07   44.41
   3 -11  -3  734.24   42.39
   2 -11  -3   32.86    7.48
   2 -11  -3   20.27    6.98
   1 -11  -3   25.68    6.40
   1 -11  -3   27.13    6.64
   1 -11  -3   22.76    4.86
   0  11   3  404.81   25.23
   0 -11  -3  402.48   25.11
   0 -11  -3  404.82   24.77
   1  11   3  191.98   14.17
  -1 -11  -3  224.57   15.42
   2  11   3   46.22    5.99
  -2 -11  -3   70.00    7.81
  -3 -11  -3 2222.10  112.88
   3  11   3 2199.18  118.06
  -4 -11  -3 1361.86   71.54
   4  11   3 1337.55   73.14
   5  11   3   11.64    4.77
  -5 -11  -3    8.02    6.83
   6  11   3    5.78    5.31
  -6 -11  -3   -8.75    5.76
  -7 -11  -3   98.07   14.39
  -8 -11  -3  581.52   36.69
  -9 -11  -3   33.57   13.94
  -9 -11  -3   15.36   10.01
 -10 -11  -3   31.83   16.36
 -10 -11  -3   48.67   14.31
 -11 -11  -3    1.99   13.46
 -12 -11  -3   80.56   22.70
 -13 -11  -3   70.08   22.66
 -14 -11  -3  -10.93   14.90
 -15 -11  -3  129.28   30.42
 -16 -11  -3    2.30   19.66
  18 -12  -3   28.31   23.55
  17 -12  -3   -1.84   22.26
  16 -12  -3   18.71   22.42
  15 -12  -3   10.79   19.94
  14 -12  -3   57.87   21.77
  13 -12  -3   92.96   23.73
  12 -12  -3    1.93   12.72
  11 -12  -3  307.91   31.30
  10 -12  -3   42.53   16.30
   9 -12  -3  671.79   49.11
   8 -12  -3   85.33   17.78
   7 -12  -3  494.40   36.42
  -7  12   3  481.33   27.50
   7 -12  -3  433.89   32.64
   6 -12  -3  193.00   17.70
   6 -12  -3  166.90   18.41
  -6  12   3  141.62   10.71
   5 -12  -3  412.11   29.05
   5 -12  -3  309.30   25.62
   4 -12  -3  527.57   35.24
   4 -12  -3  502.90   33.30
   3 -12  -3  539.16   33.68
   3 -12  -3  455.63   31.29
   2 -12  -3    3.34    6.18
   2 -12  -3    7.53    5.71
   1 -12  -3  101.47   10.12
   1 -12  -3   81.84   12.09
   1 -12  -3   86.53    7.76
   0 -12  -3  721.79   40.94
   0 -12  -3  714.24   40.96
   0  12   3  709.64   41.76
  -1 -12  -3  224.87   16.05
   1  12   3  200.34   14.69
   2  12   3  183.18   12.64
  -2 -12  -3  183.38   14.32
   3  12   3  330.11   20.35
  -3 -12  -3  348.89   22.47
   4  12   3  326.89   19.88
  -4 -12  -3  340.81   22.92
  -5 -12  -3  942.23   52.50
   5  12   3  940.81   52.02
  -6 -12  -3  119.11   12.49
   6  12   3  118.86   10.36
  -7 -12  -3  450.75   29.66
  -8 -12  -3   29.40   10.61
  -9 -12  -3 1167.05   66.12
 -10 -12  -3    1.00   10.76
 -10 -12  -3    1.01   11.57
 -11 -12  -3  186.95   29.74
 -12 -12  -3  125.23   23.38
 -13 -12  -3   63.88   22.37
 -14 -12  -3    9.47   17.43
 -15 -12  -3   30.06   20.62
 -16 -12  -3   -3.23   16.99
  18 -13  -3   24.85   24.30
  17 -13  -3   45.27   25.08
  16 -13  -3    5.58   19.63
  15 -13  -3  288.02   41.52
  14 -13  -3   53.89   22.68
  13 -13  -3  172.54   30.58
  12 -13  -3  171.64   28.36
  11 -13  -3  216.16   26.14
  10 -13  -3   22.53   15.44
   9 -13  -3  137.02   21.76
   8 -13  -3   65.55   16.65
   8 -13  -3   19.84   11.53
   7 -13  -3   29.74   12.60
   7 -13  -3   55.38   13.35
   6 -13  -3   22.33    9.94
   6 -13  -3   39.23   12.18
   5 -13  -3 1314.23   70.03
   5 -13  -3 1136.80   73.36
   4 -13  -3   41.33   12.22
   4 -13  -3   86.06   13.61
   3 -13  -3  264.33   19.82
   3 -13  -3  229.95   19.76
   2 -13  -3   49.44    9.43
   2 -13  -3   47.16    5.12
   2 -13  -3   65.97   11.48
   1 -13  -3  197.17   16.36
   1 -13  -3  210.83   14.35
   1 -13  -3  229.82   17.10
   0  13   3  184.93   14.01
   0 -13  -3  162.43   14.49
   1  13   3 1697.19   93.32
  -1 -13  -3 1731.09   89.48
   2  13   3   56.72    6.79
  -2 -13  -3   77.28    8.91
  -3 -13  -3   88.98   12.08
   3  13   3   58.36    6.55
  -4 -13  -3   96.37   13.33
  -5 -13  -3  318.70   22.51
  -6 -13  -3  232.31   19.08
  -7 -13  -3   42.43   10.81
  -8 -13  -3  256.10   21.07
  -9 -13  -3   95.22   17.14
 -10 -13  -3  254.68   29.46
 -10 -13  -3  305.06   24.09
 -11 -13  -3   -1.65   11.66
 -12 -13  -3   15.92   16.95
 -13 -13  -3  286.06   38.92
 -14 -13  -3   36.62   20.14
 -15 -13  -3   24.21   20.92
 -16 -13  -3   17.96   20.02
  17 -14  -3   -7.23   20.40
  16 -14  -3  126.99   31.18
  15 -14  -3    1.53   19.95
  14 -14  -3  276.02   33.73
  13 -14  -3   42.70   18.90
  12 -14  -3   73.54   21.98
  11 -14  -3   19.14   15.65
  10 -14  -3   44.28   17.86
   9 -14  -3  510.20   41.01
   8 -14  -3    8.07   11.05
   8 -14  -3   19.76   11.77
   7 -14  -3  297.67   25.19
   7 -14  -3  301.18   27.36
   6 -14  -3  354.76   30.23
   6 -14  -3  398.02   29.07
   5 -14  -3  378.34   28.76
   5 -14  -3  325.89   26.38
   4 -14  -3  412.98   31.56
   4 -14  -3  479.89   31.07
   3 -14  -3  185.72   17.89
   3 -14  -3  230.09   18.85
   2 -14  -3  129.61   13.22
   2 -14  -3  112.58    8.78
   2 -14  -3  123.05   13.30
   1 -14  -3   80.42    7.45
   1 -14  -3   50.14   11.51
   0 -14  -3 1072.89   59.16
   1  14   3  171.78   14.36
  -1 -14  -3  224.97   16.12
  -2 -14  -3  533.56   32.95
   2  14   3  565.86   32.10
  -3 -14  -3  454.13   28.52
   3  14   3  443.75   25.95
  -4 -14  -3  721.97   42.25
  -5 -14  -3  772.63   45.10
  -6 -14  -3  328.19   23.81
  -7 -14  -3   -2.84    8.37
  -8 -14  -3   10.09   10.11
  -9 -14  -3  148.78   16.55
 -10 -14  -3   17.10   14.61
 -10 -14  -3   -0.61   10.88
 -11 -14  -3   -3.99   13.89
 -12 -14  -3  176.32   30.30
 -13 -14  -3   21.91   17.48
 -14 -14  -3   66.11   23.87
 -15 -14  -3    7.65   19.25
 -16 -14  -3  101.90   28.42
  17 -15  -3   -2.49   20.72
  16 -15  -3    1.72   20.29
  15 -15  -3   14.72   20.83
  14 -15  -3   39.60   22.00
  13 -15  -3  -16.65   13.25
  12 -15  -3   62.83   20.94
  11 -15  -3  117.92   24.39
  10 -15  -3  945.21   66.37
   9 -15  -3   23.38   13.84
   8 -15  -3  313.76   27.22
   8 -15  -3  321.17   29.59
   7 -15  -3   39.74   13.81
   7 -15  -3   11.10    9.98
   6 -15  -3  658.16   43.82
   6 -15  -3  540.93   39.49
   5 -15  -3   -0.97    8.20
   5 -15  -3    6.73    8.38
   4 -15  -3  377.93   28.87
   4 -15  -3  436.25   30.66
   3 -15  -3  511.37   35.29
   3 -15  -3  530.01   34.50
   2 -15  -3   26.30    8.48
   2 -15  -3   10.35    4.59
   1 -15  -3   83.94   14.03
   1 -15  -3   96.15    8.81
   1 -15  -3   87.50   12.41
   0 -15  -3  553.42   34.63
   1  15   3  592.84   37.59
  -1 -15  -3  686.11   38.63
   2  15   3  898.37   50.70
  -2 -15  -3  911.26   50.91
  -3 -15  -3   -3.71    6.33
   3  15   3   -2.36    3.53
  -4 -15  -3  248.25   19.40
  -5 -15  -3  206.13   17.64
  -6 -15  -3  228.82   19.63
  -7 -15  -3   71.68   14.05
  -8 -15  -3  911.95   54.04
  -9 -15  -3   24.89   11.90
 -10 -15  -3  198.08   19.67
 -11 -15  -3   -6.42   12.69
 -12 -15  -3  149.11   28.48
 -13 -15  -3  -10.84   15.26
 -14 -15  -3   39.39   20.16
 -15 -15  -3    9.01   16.12
 -16 -15  -3   -0.47   18.30
  17 -16  -3  -11.59   23.29
  16 -16  -3    4.62   19.96
  15 -16  -3   32.81   22.67
  14 -16  -3  248.02   38.91
  13 -16  -3   11.04   16.68
  12 -16  -3   38.98   18.51
  11 -16  -3  130.58   25.97
  10 -16  -3  217.21   26.89
   9 -16  -3  159.30   23.74
   9 -16  -3  110.01   22.45
   8 -16  -3  229.75   24.17
   8 -16  -3  169.65   25.22
   7 -16  -3   24.56   13.47
   7 -16  -3   28.70   12.71
   6 -16  -3  441.43   37.05
   6 -16  -3  563.93   37.18
   5 -16  -3   67.27   13.66
   5 -16  -3   64.48   14.31
   4 -16  -3   97.10   16.62
   4 -16  -3   95.04   15.24
   3 -16  -3   83.31   14.01
   3 -16  -3   90.46   14.63
   2 -16  -3 3808.25  194.76
   2 -16  -3 3784.56  207.25
   2 -16  -3 3882.99  197.75
   1 -16  -3   80.48   14.11
   1 -16  -3   74.34    8.30
   1 -16  -3   94.37   12.61
   0 -16  -3 2980.95  162.21
   0 -16  -3 3027.51  154.03
   1  16   3    6.46    5.70
  -2 -16  -3  457.28   29.14
   2  16   3  442.25   27.20
   3  16   3   -0.67    3.47
  -3 -16  -3    1.00    6.78
  -4 -16  -3  615.49   37.75
  -5 -16  -3    8.10    8.45
  -6 -16  -3  387.79   27.51
  -7 -16  -3   69.35   15.17
  -8 -16  -3   27.57   12.14
  -9 -16  -3  670.29   43.65
 -10 -16  -3   20.59   12.89
 -11 -16  -3  -12.44   10.55
 -12 -16  -3  118.22   26.51
 -13 -16  -3   -3.92   15.01
 -14 -16  -3   -4.51   15.81
 -15 -16  -3   15.07   19.20
 -16 -16  -3   43.96   24.32
  17 -17  -3    0.98   25.88
  16 -17  -3    1.83   18.67
  15 -17  -3  103.37   29.39
  14 -17  -3   -0.51   17.13
  13 -17  -3   87.01   25.30
  12 -17  -3    2.82   15.74
  11 -17  -3  225.71   28.06
  10 -17  -3  257.94   29.58
   9 -17  -3   21.67   13.17
   9 -17  -3   22.44   14.35
   8 -17  -3  210.99   24.25
   8 -17  -3  230.23   23.40
   7 -17  -3   18.05   11.93
   7 -17  -3   24.67   13.41
   6 -17  -3 1204.95   70.60
   6 -17  -3 1170.09   74.44
   5 -17  -3  285.89   24.75
   5 -17  -3  283.39   25.66
   4 -17  -3  163.52   17.62
   4 -17  -3  185.43   18.50
   3 -17  -3  453.07   32.93
   3 -17  -3  473.80   32.56
   1 -17  -3  687.20   39.43
   1 -17  -3  710.51   42.98
   1 -17  -3  662.96   41.76
   0 -17  -3  298.91   22.74
   1  17   3 1180.88   62.95
  -1 -17  -3 1030.41   61.07
  -2 -17  -3  561.15   35.06
   2  17   3  568.33   33.56
   3  17   3    8.44    4.21
  -3 -17  -3   10.52    7.73
  -4 -17  -3   94.69   14.22
  -5 -17  -3  125.69   14.34
  -6 -17  -3  187.59   17.79
  -7 -17  -3   -9.37    8.48
  -8 -17  -3    2.21   11.15
  -9 -17  -3   24.15   12.52
 -10 -17  -3   12.00   12.52
 -11 -17  -3   -7.50   12.84
 -12 -17  -3   23.97   18.73
 -13 -17  -3  190.75   32.54
 -14 -17  -3  -15.44   14.79
 -15 -17  -3   38.90   21.00
 -16 -17  -3   19.10   21.59
  17 -18  -3  -13.36   22.17
  16 -18  -3    2.61   17.80
  15 -18  -3   18.98   21.25
  14 -18  -3   30.20   22.14
  13 -18  -3   93.82   25.56
  12 -18  -3    0.18   15.84
  11 -18  -3   76.32   22.18
  10 -18  -3   36.12   19.03
   9 -18  -3  541.72   44.25
   9 -18  -3  561.14   41.59
   8 -18  -3   -5.42   11.15
   8 -18  -3   10.31   11.94
   7 -18  -3 1100.38   72.49
   7 -18  -3 1142.42   68.88
   6 -18  -3   45.43   15.02
   6 -18  -3   77.86   17.15
   5 -18  -3  397.45   31.19
   5 -18  -3  416.22   32.35
   4 -18  -3   -0.76    8.33
   4 -18  -3   12.09    9.31
   3 -18  -3 1262.35   74.29
   3 -18  -3 1370.05   78.44
   2 -18  -3    7.24    8.45
   2 -18  -3   -0.20    4.41
   2 -18  -3   -3.53    6.29
   1 -18  -3   50.44   12.24
   1 -18  -3   41.09    9.97
   0 -18  -3   28.71    9.06
   0 -18  -3   18.75    7.69
  -1 -18  -3  601.55   37.32
   1  18   3  577.40   35.98
   2  18   3  232.79   17.71
  -2 -18  -3  277.02   20.90
  -3 -18  -3  450.88   30.53
   3  18   3  489.47   27.61
  -4 -18  -3    0.24    7.67
  -5 -18  -3 1227.09   68.81
  -6 -18  -3  226.92   19.96
  -7 -18  -3  141.64   16.29
  -8 -18  -3   -1.83   11.12
  -9 -18  -3  194.02   20.09
 -10 -18  -3   60.99   16.71
 -11 -18  -3   77.58   18.44
 -11 -18  -3   40.24   19.16
 -12 -18  -3  -11.18   14.56
 -13 -18  -3   38.72   20.52
 -14 -18  -3   -0.67   16.88
 -15 -18  -3   49.20   22.66
  17 -19  -3   37.31   27.55
  16 -19  -3   -8.64   18.60
  15 -19  -3   13.35   22.10
  14 -19  -3    7.69   19.00
  13 -19  -3  132.89   29.10
  12 -19  -3  -16.52   13.98
  11 -19  -3  457.56   41.76
  10 -19  -3  160.37   29.12
  10 -19  -3  185.34   28.98
   9 -19  -3   11.25   13.75
   9 -19  -3   62.67   18.54
   8 -19  -3  110.17   21.76
   8 -19  -3  119.16   21.97
   7 -19  -3   71.08   17.73
   7 -19  -3   25.89   13.84
   6 -19  -3  263.14   25.26
   6 -19  -3  209.68   23.18
   5 -19  -3  113.21   19.19
   5 -19  -3   71.00   16.13
   4 -19  -3  524.59   38.08
   4 -19  -3  612.71   40.80
   3 -19  -3 1467.50   79.97
   3 -19  -3 1340.82   82.66
   2 -19  -3    5.95    5.21
   2 -19  -3   27.22   10.97
   1 -19  -3  855.70   55.84
   1 -19  -3 1016.92   56.11
   0 -19  -3   26.05   10.38
  -1 -19  -3 1423.61   79.54
   1  19   3 1492.22   81.67
   2  19   3  321.00   21.62
  -2 -19  -3  323.16   24.26
  -3 -19  -3  208.80   18.38
  -4 -19  -3  303.36   23.35
  -6 -19  -3   25.55   11.08
  -7 -19  -3   -2.65    9.18
  -8 -19  -3  215.66   21.22
  -9 -19  -3   98.56   19.84
 -10 -19  -3   -4.72   10.05
 -11 -19  -3   61.37   17.71
 -11 -19  -3   29.59   18.44
 -12 -19  -3  -11.05   15.34
 -13 -19  -3   -1.34   15.32
 -14 -19  -3    8.42   17.28
 -15 -19  -3   35.56   20.87
  16 -20  -3   48.18   25.50
  15 -20  -3    9.27   21.92
  14 -20  -3  106.07   29.41
  13 -20  -3    1.00   18.62
  12 -20  -3   84.77   24.49
  11 -20  -3    7.92   15.57
  10 -20  -3  442.07   38.40
  10 -20  -3  296.33   31.90
   9 -20  -3  173.59   28.64
   9 -20  -3  140.73   26.48
   8 -20  -3   67.29   18.34
   8 -20  -3   40.86   16.95
   7 -20  -3  455.30   37.13
   7 -20  -3  400.96   34.47
   6 -20  -3   97.34   19.64
   6 -20  -3   59.20   15.94
   5 -20  -3   -6.88    9.39
   5 -20  -3   -5.95    9.00
   4 -20  -3  168.45   18.62
   4 -20  -3  161.51   22.71
   3 -20  -3   74.85   15.05
   2 -20  -3 1676.18   89.70
   2 -20  -3 1644.17   96.90
   2 -20  -3 1744.77   93.38
   1 -20  -3  156.22   17.05
   1 -20  -3  170.99   16.30
   0 -20  -3 1212.22   70.32
   0 -20  -3 1280.06   71.86
  -1 -20  -3  634.24   39.90
   1  20   3  611.54   38.21
  -2 -20  -3  807.00   49.88
   2  20   3  875.19   48.87
  -3 -20  -3   30.94   11.13
  -4 -20  -3  159.39   16.30
  -5 -20  -3  381.52   28.08
  -6 -20  -3  234.88   21.25
  -7 -20  -3   42.72   14.34
  -8 -20  -3   -4.48   10.62
  -9 -20  -3   42.18   14.54
 -10 -20  -3   60.87   17.11
 -11 -20  -3   64.81   19.30
 -11 -20  -3   53.50   20.49
 -12 -20  -3   17.19   19.35
 -13 -20  -3    2.73   15.71
 -14 -20  -3  -18.83   14.12
 -15 -20  -3   13.00   18.00
  16 -21  -3   62.73   28.54
  15 -21  -3    2.74   21.07
  14 -21  -3  -18.55   17.88
  13 -21  -3   -3.87   16.44
  12 -21  -3   48.46   20.19
  11 -21  -3   27.53   17.50
  10 -21  -3  562.73   49.38
  10 -21  -3  690.49   49.17
   9 -21  -3    2.23   14.67
   9 -21  -3   15.40   14.42
   8 -21  -3  279.64   29.21
   8 -21  -3  329.48   31.37
   7 -21  -3   63.61   18.96
   7 -21  -3   54.79   18.37
   6 -21  -3 1120.32   68.90
   6 -21  -3 1089.70   71.45
   5 -21  -3  -16.87    8.68
   5 -21  -3    5.07    9.59
   4 -21  -3  162.81   19.45
   4 -21  -3  183.53   20.04
   3 -21  -3  230.64   21.99
   3 -21  -3  197.19   21.29
   2 -21  -3  261.13   23.06
   2 -21  -3  284.47   23.28
   2 -21  -3  220.51   16.81
   1 -21  -3    7.34    8.36
   1 -21  -3   -1.90    8.61
   0 -21  -3  149.74   16.59
   0 -21  -3  121.12   13.21
  -1 -21  -3  149.17   19.49
   1  21   3  147.30   14.12
  -2 -21  -3  907.50   54.05
  -3 -21  -3   35.88   12.15
  -4 -21  -3  186.05   18.21
  -5 -21  -3  163.41   17.39
  -6 -21  -3  636.70   41.74
  -7 -21  -3   51.06   15.11
  -8 -21  -3  251.48   23.92
  -9 -21  -3   -4.93   10.80
 -10 -21  -3  -15.16   10.39
 -11 -21  -3   41.25   16.73
 -11 -21  -3   -3.78   16.25
 -12 -21  -3   65.97   23.02
 -13 -21  -3   -6.50   14.57
 -14 -21  -3   -2.27   14.14
 -15 -21  -3   14.36   19.06
  16 -22  -3  146.63   35.96
  15 -22  -3   23.65   22.27
  14 -22  -3   67.48   26.38
  13 -22  -3   24.55   20.09
  12 -22  -3   98.95   26.19
  11 -22  -3   99.49   24.98
  10 -22  -3  154.20   28.39
  10 -22  -3  109.01   26.03
   9 -22  -3   26.59   16.35
   9 -22  -3   45.88   19.05
   8 -22  -3  195.63   29.03
   8 -22  -3  212.26   24.99
   7 -22  -3  336.55   32.83
   7 -22  -3  384.21   33.16
   6 -22  -3   44.82   16.30
   6 -22  -3   83.99   19.97
   5 -22  -3  161.66   22.72
   5 -22  -3  145.48   23.69
   4 -22  -3   26.70   13.33
   4 -22  -3   24.04   12.03
   3 -22  -3  447.28   35.89
   3 -22  -3  567.46   37.95
   2 -22  -3  391.51   30.05
   2 -22  -3  381.91   29.37
   1 -22  -3   -3.43    7.37
   1 -22  -3    2.12    9.47
   0 -22  -3  378.60   27.54
   0 -22  -3  413.48   29.63
  -1 -22  -3  438.10   31.97
   1  22   3  455.83   30.01
  -2 -22  -3  775.49   48.01
  -3 -22  -3   40.04   12.76
  -4 -22  -3  212.29   19.90
  -5 -22  -3  536.44   36.78
  -6 -22  -3   18.41   11.95
  -7 -22  -3   40.69   14.74
  -8 -22  -3   -2.78    9.76
  -9 -22  -3  -20.73   10.79
 -10 -22  -3  101.19   21.87
 -11 -22  -3    8.69   15.51
 -11 -22  -3   11.23   16.15
 -12 -22  -3   58.70   23.01
 -13 -22  -3   -1.54   14.51
 -14 -22  -3   50.92   22.41
 -15 -22  -3    4.00   17.97
  16 -23  -3    7.52   24.91
  15 -23  -3  108.03   34.31
  14 -23  -3   -0.28   19.63
  13 -23  -3  112.37   29.74
  12 -23  -3   40.33   21.70
  11 -23  -3  422.39   38.71
  11 -23  -3  402.15   40.40
  10 -23  -3   22.89   17.81
  10 -23  -3   48.53   20.81
   9 -23  -3  106.96   24.49
   9 -23  -3  101.13   22.65
   8 -23  -3  205.73   31.29
   8 -23  -3  132.66   26.02
   7 -23  -3   20.04   14.87
   7 -23  -3   31.89   16.03
   6 -23  -3   17.67   14.68
   6 -23  -3   26.76   13.94
   5 -23  -3   41.88   14.22
   5 -23  -3   35.52   15.50
   4 -23  -3   17.28   12.88
   4 -23  -3   -0.76    9.39
   3 -23  -3  740.00   47.34
   3 -23  -3  656.25   46.84
   2 -23  -3   10.28    9.23
   2 -23  -3   12.73   10.28
   1 -23  -3  238.64   21.19
   1 -23  -3  259.83   22.59
   0 -23  -3  104.60   14.65
   0 -23  -3   97.28   18.04
   1  23   3  775.45   46.93
  -1 -23  -3  759.26   47.89
  -2 -23  -3   64.99   14.97
  -3 -23  -3  353.84   27.47
  -4 -23  -3    6.84    8.47
  -5 -23  -3  122.66   19.61
  -6 -23  -3  146.30   21.61
  -7 -23  -3   55.14   15.58
  -8 -23  -3  176.54   20.26
  -9 -23  -3   13.81   12.58
 -10 -23  -3   24.67   15.56
 -11 -23  -3   70.58   23.11
 -11 -23  -3   76.16   20.69
 -12 -23  -3    8.43   18.08
 -13 -23  -3   29.71   18.60
 -14 -23  -3   -1.28   16.83
  15 -24  -3    3.51   21.98
  14 -24  -3   -6.14   19.45
  13 -24  -3   92.48   28.50
  12 -24  -3   20.91   19.86
  11 -24  -3  291.05   38.85
  11 -24  -3  154.31   31.35
  10 -24  -3    6.64   16.76
  10 -24  -3    4.61   15.40
   9 -24  -3  298.04   32.06
   9 -24  -3  272.65   30.66
   8 -24  -3   14.27   15.02
   8 -24  -3   19.85   15.18
   7 -24  -3  400.48   36.03
   7 -24  -3  371.23   34.74
   6 -24  -3   61.26   18.97
   6 -24  -3   84.23   19.79
   5 -24  -3  156.92   25.19
   5 -24  -3  192.52   26.47
   4 -24  -3   -0.87   11.33
   4 -24  -3   -8.77    9.85
   3 -24  -3  116.46   20.15
   3 -24  -3  104.34   19.17
   2 -24  -3  207.98   20.61
   2 -24  -3  202.08   20.69
   1 -24  -3   76.62   17.19
   1 -24  -3   82.96   14.42
   0 -24  -3   26.03   12.88
   0 -24  -3   33.14   10.41
  -1 -24  -3  388.72   30.30
  -2 -24  -3  142.70   20.72
  -3 -24  -3   50.14   14.11
  -4 -24  -3   20.12   10.66
  -5 -24  -3  699.81   45.82
  -6 -24  -3  153.46   21.40
  -7 -24  -3  256.42   24.27
  -8 -24  -3   61.07   17.81
  -9 -24  -3   90.88   19.65
 -10 -24  -3   -0.87   13.73
 -11 -24  -3  203.10   33.42
 -12 -24  -3  -14.60   15.59
 -13 -24  -3   -8.16   15.68
 -14 -24  -3   15.02   17.97
  15 -25  -3  129.24   34.16
  14 -25  -3    8.02   19.86
  13 -25  -3  133.70   30.74
  12 -25  -3    9.98   17.97
  11 -25  -3   44.81   22.01
  11 -25  -3   59.08   23.84
  10 -25  -3  166.10   32.27
  10 -25  -3   91.36   24.90
   9 -25  -3    6.20   17.35
   9 -25  -3   62.81   20.68
   8 -25  -3  194.31   31.69
   8 -25  -3  209.02   31.09
   7 -25  -3   40.10   18.13
   7 -25  -3   76.39   21.33
   6 -25  -3  200.57   29.79
   6 -25  -3  221.78   24.74
   5 -25  -3  179.86   27.06
   5 -25  -3  163.27   20.52
   4 -25  -3   43.13   14.18
   4 -25  -3   30.41   13.42
   3 -25  -3   21.15   11.35
   3 -25  -3    1.79   10.70
   2 -25  -3   11.39   11.10
   2 -25  -3    3.82   10.61
   1 -25  -3  228.67   20.69
   1 -25  -3  219.91   22.60
   0 -25  -3   -2.42    8.26
   0 -25  -3   -0.89    8.41
  -1 -25  -3  308.55   25.78
  -2 -25  -3  151.19   21.61
  -3 -25  -3  185.57   23.72
  -4 -25  -3   -3.90   10.61
  -5 -25  -3  342.12   28.37
  -6 -25  -3   95.98   18.42
  -7 -25  -3   59.46   16.97
  -8 -25  -3   56.07   17.66
  -9 -25  -3   -5.69   13.39
 -10 -25  -3   19.50   16.49
 -11 -25  -3   14.93   17.19
 -11 -25  -3   15.86   18.16
 -12 -25  -3   43.05   21.91
 -13 -25  -3   13.03   17.29
 -14 -25  -3    5.29   17.57
  15 -26  -3   33.56   25.96
  14 -26  -3   95.04   31.18
  13 -26  -3    4.87   19.44
  12 -26  -3   62.57   24.80
  11 -26  -3   42.72   21.08
  11 -26  -3   39.37   21.07
  10 -26  -3    7.07   18.55
  10 -26  -3   20.88   18.38
   9 -26  -3   77.03   22.35
   9 -26  -3  120.48   26.79
   8 -26  -3    5.46   14.10
   8 -26  -3   29.10   18.91
   7 -26  -3   17.06   17.08
   7 -26  -3   18.17   15.00
   6 -26  -3  220.13   25.57
   6 -26  -3  199.53   28.72
   5 -26  -3  181.64   27.75
   5 -26  -3  177.27   22.50
   4 -26  -3   13.29   13.24
   4 -26  -3   16.05   13.00
   3 -26  -3   -4.50   10.43
   3 -26  -3    7.53    9.97
   2 -26  -3  119.13   20.97
   2 -26  -3  115.29   19.23
   1 -26  -3    9.15   10.12
   1 -26  -3   17.18   13.03
   0 -26  -3  153.82   22.87
  -1 -26  -3   58.16   16.18
  -2 -26  -3  493.35   35.51
  -3 -26  -3   60.64   16.94
  -4 -26  -3  116.61   20.13
  -5 -26  -3   37.74   14.67
  -6 -26  -3   36.00   14.72
  -7 -26  -3   38.68   16.02
  -8 -26  -3   44.92   16.03
  -9 -26  -3   47.22   17.45
 -10 -26  -3    7.37   15.17
 -11 -26  -3    5.29   14.19
 -11 -26  -3   -7.07   16.05
 -12 -26  -3  103.10   28.06
 -13 -26  -3    0.13   17.17
 -14 -26  -3   52.86   23.74
  15 -27  -3   13.63   23.46
  14 -27  -3   -0.46   22.52
  13 -27  -3    5.37   21.85
  12 -27  -3   70.43   25.49
  11 -27  -3    7.25   20.67
  11 -27  -3   27.37   20.67
  10 -27  -3  344.65   44.46
  10 -27  -3  276.62   33.72
   9 -27  -3   30.91   22.04
   9 -27  -3   42.75   20.34
   8 -27  -3  267.59   37.44
   8 -27  -3  255.38   35.28
   7 -27  -3   -9.45   14.44
   7 -27  -3    9.00   14.59
   6 -27  -3  246.68   34.22
   6 -27  -3  266.97   28.05
   5 -27  -3   -1.92   12.07
   5 -27  -3    4.44   15.47
   4 -27  -3  150.59   25.40
   4 -27  -3  174.71   24.36
   3 -27  -3   51.04   16.39
   3 -27  -3   38.36   14.71
   2 -27  -3   21.86   13.68
   2 -27  -3   -0.34   10.54
   1 -27  -3  103.13   18.54
   1 -27  -3  126.95   18.95
   0 -27  -3   10.78   10.45
  -1 -27  -3   58.45   16.31
  -2 -27  -3   29.84   14.01
  -3 -27  -3   76.16   17.95
  -4 -27  -3  151.33   23.17
  -5 -27  -3  143.42   22.76
  -6 -27  -3  146.04   23.17
  -7 -27  -3   42.08   16.99
  -8 -27  -3  214.29   23.30
  -9 -27  -3   24.78   16.93
 -10 -27  -3  195.66   28.69
 -11 -27  -3  -11.74   15.70
 -11 -27  -3  -13.65   14.55
 -12 -27  -3   11.56   19.17
 -13 -27  -3    1.58   17.07
  14 -28  -3   67.75   31.18
  13 -28  -3   24.51   22.55
  12 -28  -3   39.77   23.48
  11 -28  -3   98.34   26.17
  11 -28  -3   89.81   27.55
  10 -28  -3   23.62   22.13
  10 -28  -3   26.39   20.14
   9 -28  -3  110.62   28.18
   9 -28  -3  139.97   29.40
   8 -28  -3    4.96   15.57
   8 -28  -3    8.59   18.38
   7 -28  -3   95.39   23.03
   7 -28  -3   65.47   23.02
   6 -28  -3   77.16   22.46
   6 -28  -3   70.18   19.80
   5 -28  -3   -3.90   15.09
   5 -28  -3   10.32   14.19
   4 -28  -3  167.17   21.48
   4 -28  -3  208.76   29.46
   3 -28  -3   98.30   19.35
   3 -28  -3  109.44   20.95
   2 -28  -3  121.76   20.21
   2 -28  -3  126.72   23.12
   1 -28  -3   30.03   16.02
   0 -28  -3  284.23   26.90
  -1 -28  -3   23.65   14.20
  -2 -28  -3   65.38   17.59
  -3 -28  -3  136.66   22.54
  -4 -28  -3  129.34   22.49
  -5 -28  -3  205.41   26.67
  -6 -28  -3   39.76   15.60
  -7 -28  -3    3.74   13.94
  -8 -28  -3   32.73   15.47
  -9 -28  -3  117.91   23.37
 -10 -28  -3  -10.42   14.76
 -11 -28  -3   63.04   21.56
 -11 -28  -3   84.06   25.02
 -12 -28  -3   -0.16   18.55
 -13 -28  -3   -4.95   18.38
  14 -29  -3   36.68   26.06
  13 -29  -3   99.88   31.19
  12 -29  -3  -11.94   18.00
  11 -29  -3   53.83   24.08
  11 -29  -3   76.32   28.10
  10 -29  -3   -5.12   19.31
  10 -29  -3    9.83   18.07
   9 -29  -3   17.81   19.35
   9 -29  -3    4.79   18.89
   8 -29  -3   -4.87   16.76
   8 -29  -3    1.94   15.74
   7 -29  -3  -14.00   13.38
   7 -29  -3   -2.67   15.10
   6 -29  -3   26.90   17.80
   6 -29  -3   39.82   17.13
   5 -29  -3  153.55   28.16
   5 -29  -3  132.67   24.41
   4 -29  -3   59.06   19.86
   4 -29  -3   96.55   20.98
   3 -29  -3  223.01   25.31
   3 -29  -3  258.48   25.53
   2 -29  -3    5.13   10.76
   2 -29  -3   -2.80   12.16
   1 -29  -3  193.47   22.92
   0 -29  -3   56.10   16.92
  -1 -29  -3  328.39   29.44
  -2 -29  -3   61.61   15.87
  -3 -29  -3   49.69   16.33
  -4 -29  -3  117.22   22.41
  -5 -29  -3  181.63   21.04
  -6 -29  -3  -12.98   11.30
  -7 -29  -3    3.19   14.57
  -8 -29  -3   11.85   14.09
  -9 -29  -3   10.98   15.05
 -10 -29  -3   -4.99   16.21
 -11 -29  -3   -3.81   16.15
 -11 -29  -3   18.49   16.70
 -12 -29  -3  -22.49   17.05
 -13 -29  -3   74.54   25.86
  14 -30  -3   27.91   26.11
  13 -30  -3   -9.07   21.64
  12 -30  -3    1.39   21.02
  11 -30  -3  116.62   31.84
  10 -30  -3   26.69   22.60
  10 -30  -3   19.53   19.67
   9 -30  -3  147.48   33.30
   9 -30  -3  213.33   35.11
   8 -30  -3  -14.13   17.60
   8 -30  -3    7.38   16.12
   7 -30  -3  113.67   29.21
   7 -30  -3  185.72   30.60
   6 -30  -3   -0.28   16.84
   6 -30  -3   -2.58   14.18
   5 -30  -3  386.77   35.74
   5 -30  -3  408.31   36.97
   4 -30  -3   39.85   18.58
   4 -30  -3   54.51   17.70
   3 -30  -3   43.61   18.44
[truncated: 1,371,036 more chars]
